# Supplementary material for: The human umbilical cord–mesenchymal stem cell secretome regulates hair growth and cycle transition by promoting methylthioadenosine synthesis via the PI3K/AKT/mTOR pathway
Source: Research Square preprint supplement (doi:10.21203/rs.3.rs-7150416/v1), 2025-08-07

UNEDITED WESTERN BLOTS

Representative unedited western blots from Fig.7C

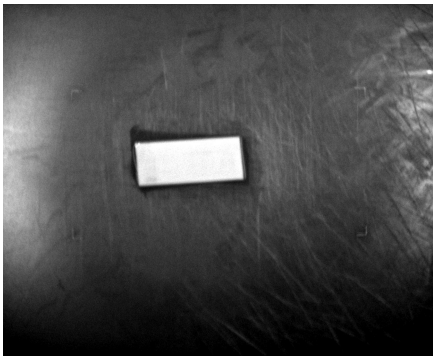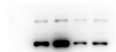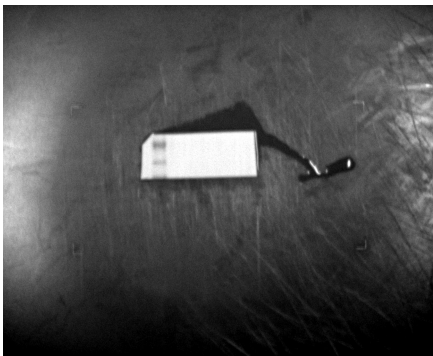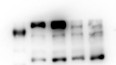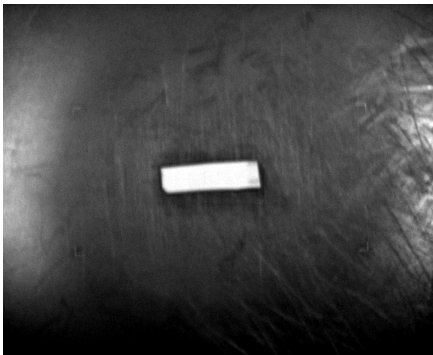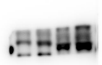

UNEDITED WESTERN BLOTS

Representative unedited western blots from Fig.7C

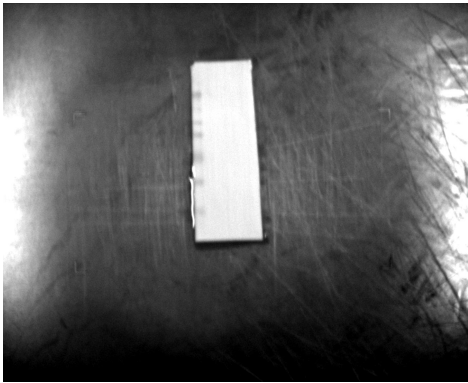

PI3K

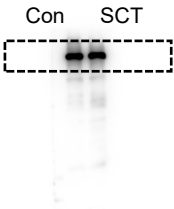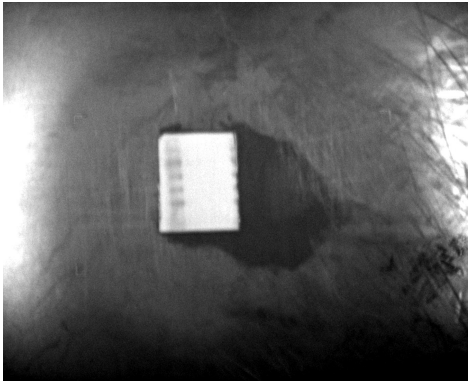

AKT

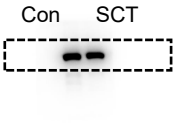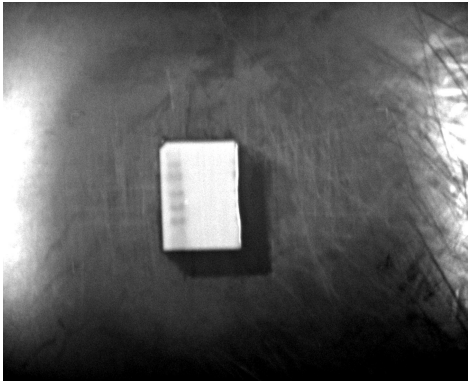

mTOR

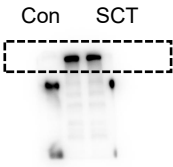

UNEDITED WESTERN BLOTS

Representative unedited western blots from Fig.7C

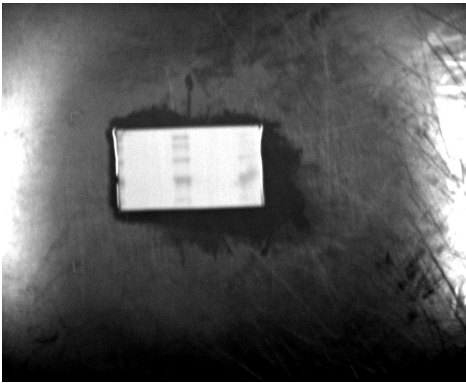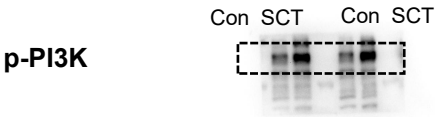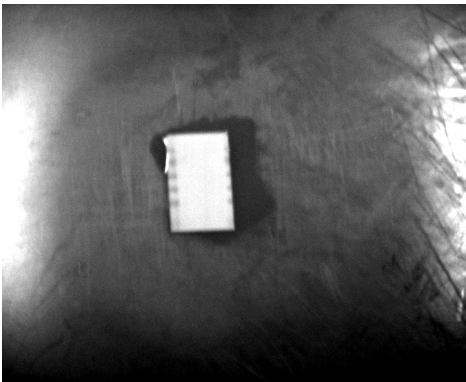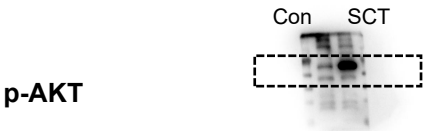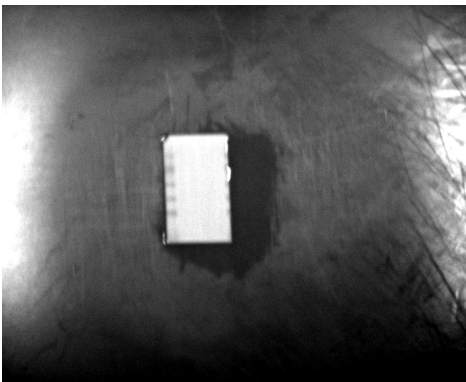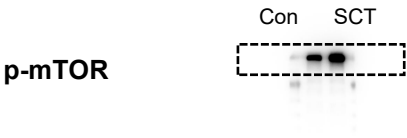

UNEDITED WESTERN BLOTS  
Representative unedited western blots from Fig.7F

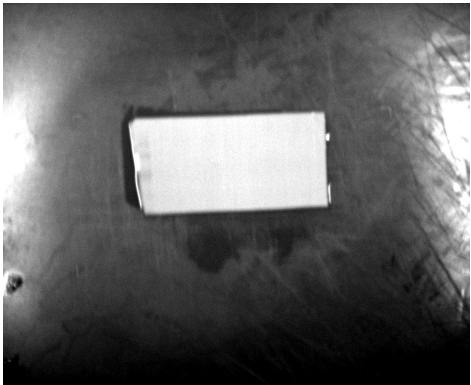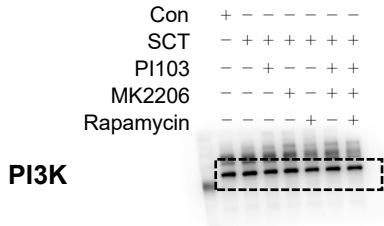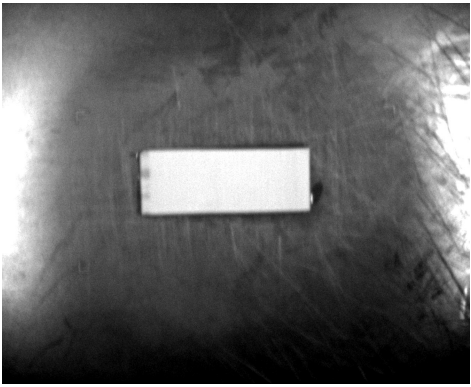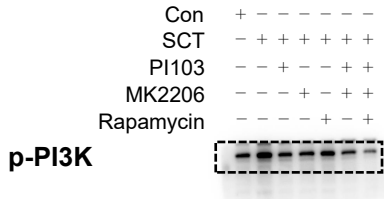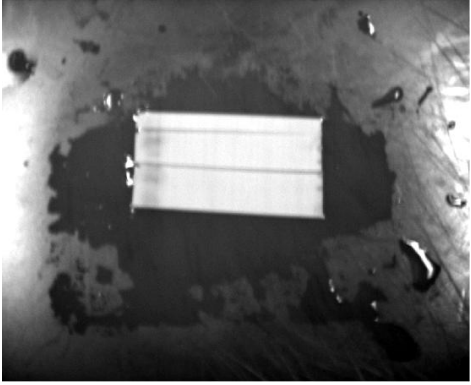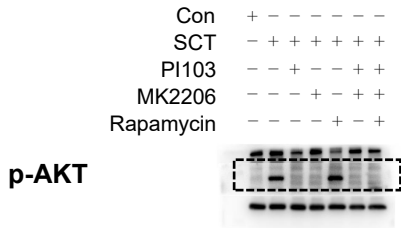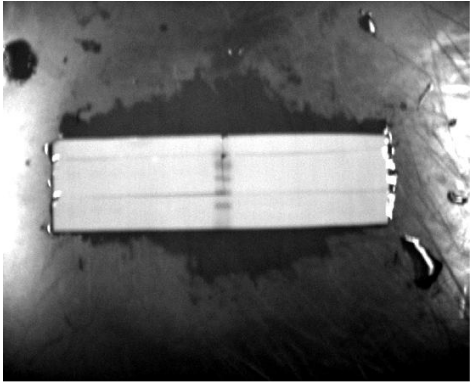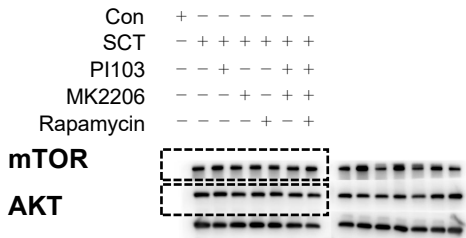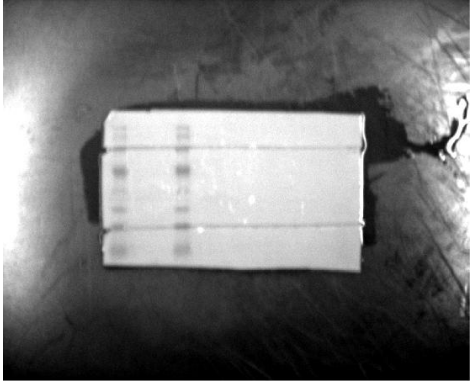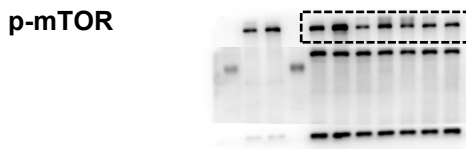

Supplement: Supplementary file 1 [file 8e0bc9f71cd0012358211601.pdf]
