# Supplementary material for: The human umbilical cord–mesenchymal stem cell secretome regulates hair growth and cycle transition by promoting methylthioadenosine synthesis via the PI3K/AKT/mTOR pathway
Source: Research Square preprint supplement (doi:10.21203/rs.3.rs-7150416/v1), 2025-08-07
Supplement: Supplementary file 1 [file 6fe89e56f2a8483b8f097816.xlsx]

## Sheet: protein identification table
PG.ProteinGroups	PG.ProteinAccessions	PG.Genes	PG.ProteinDescriptions	CONT1.PG.Quantity	CONT2.PG.Quantity	CONT3.PG.Quantity	SCT1.PG.Quantity	SCT2.PG.Quantity	SCT3.PG.Quantity	CONX1.PG.Quantity	CONX2.PG.Quantity	CONX3.PG.Quantity
A0A023J5X7;A0A023J5Z0;A0A023J632;A0A023J654;A0A023J663;A0A023J684;A0A023J692;A0A023J6C5;A0A023J6E1;A0A023J6K5;A0A023J6M1;A0A067XKR4;A0A067XKW7;A0A075DCI1;A0A0F6PZ84;A0A0F6Q0S0;A0A141CM24;A0A141CM50;A0A6M8U8E2;A3E4B6;A3R461;A3R4A0;A9UIX0;B9V1K8;F1JVR2;K7X731;K7X7Z6;P03911;Q5GA75;Q7JCY6;Q7JCZ9;Q9ME04;W0TGY1	A0A023J5X7;A0A023J5Z0;A0A023J632;A0A023J654;A0A023J663;A0A023J684;A0A023J692;A0A023J6C5;A0A023J6E1;A0A023J6K5;A0A023J6M1;A0A067XKR4;A0A067XKW7;A0A075DCI1;A0A0F6PZ84;A0A0F6Q0S0;A0A141CM24;A0A141CM50;A0A6M8U8E2;A3E4B6;A3R461;A3R4A0;A9UIX0;B9V1K8;F1JVR2;K7X731;K7X7Z6;P03911;Q5GA75;Q7JCY6;Q7JCZ9;Q9ME04;W0TGY1	ND4;ND4;ND4;ND4;ND4;ND4;ND4;ND4;ND4;ND4;ND4;ND4;ND4;ND4;ND4;ND4;ND4;ND4;ND4;ND4;ND4;ND4;ND4;Nd4;ND4;ND4;ND4;Mtnd4;ND4;mt-Nd4;ND4;ND4;ND4	NADH-ubiquinone oxidoreductase chain 4					278.709
A0A023J6F3;A0A023J6I7;A0A075DC90;A0A0F6PXF3;A3E4B0;A3R455;A3R481;K7XK22;K7XKA7;P00405;Q5GA81;Q7JCZ1;Q7JD03	A0A023J6F3;A0A023J6I7;A0A075DC90;A0A0F6PXF3;A3E4B0;A3R455;A3R481;K7XK22;K7XKA7;P00405;Q5GA81;Q7JCZ1;Q7JD03	COX2;COX2;COX2;COXII;COX2;COXII;COXII;COXII;COXII;Mtco2;COX2;mt-Co2;COX2	Cytochrome c oxidase subunit 2	20868.1	12057.6	9185.95	13196.5	9745.61	9538.71	17349.3	19745.6	11412
A0A023T778;G3UZW7;P61327;Q9CQL1	A0A023T778;G3UZW7;P61327;Q9CQL1	Magohb;Magohb;Magoh;Magohb	Mago homolog B, exon junction complex core component;Mago homolog B, exon junction complex core component;Protein mago nashi homolog;Protein mago nashi homolog 2	12711.1	12552.2	15515.1	12268.7	8349.81	12557.1	15679.1	17497.7	13608.3
A0A023UF19;A2APA8;Q3ULB3;Q3URU7;Q61312	A0A023UF19;A2APA8;Q3ULB3;Q3URU7;Q61312	Tfap2c	Transcription factor AP-2 gamma;Transcription factor AP-2, gamma;Transcription factor AP-2, gamma;Transcription factor AP-2 C-terminal domain-containing protein (Fragment);Transcription factor AP-2 gamma	10279.7	8163.31	6838.56	14046.1	8288.28	7924.59	10042.7	5618.69	5422.06
A0A067XG49;F6QYS7;F6YMV1;Q8VHG2	A0A067XG49;F6QYS7;F6YMV1;Q8VHG2	Amot	Angiomotin;Angiomotin (Fragment);Angiomotin (Fragment);Angiomotin	3484.01	4694.58	3454.62	2260.96	1334.75	3218.78	2443.75	1128.35	1177.46
A0A067XG53	A0A067XG53	Cask	Calcium/calmodulin-dependent serine protein kinase (MAGUK family) (Fragment)	2737.03	2982.16	1967.96	3674.39	5053.97	4089.68		5400.75	975.922
A0A068BD65;A0A068BFV6;A0A068BGT5;A0A068BGV8;A0A068BIV0;P28704;Q3TWJ1	A0A068BD65;A0A068BFV6;A0A068BGT5;A0A068BGV8;A0A068BIV0;P28704;Q3TWJ1	Rxrb	Putative retinoid X receptor beta isoform 2;Putative retinoid X receptor beta isoform 3;Retinoid X receptor beta;Putative retinoid X receptor beta isoform 1;Putative retinoid X receptor beta isoform 5;Retinoic acid receptor RXR-beta;Retinoid X receptor beta	19545.3	18835.2	19319.5	1962.33	3142.17	1714.58	6385.7		2816.85
A0A068BEQ2;G3UX44;P50171	A0A068BEQ2;G3UX44;P50171	Hsd17b8	H2-K region protein 6;H2-K region expressed gene 6 (Fragment);(3R)-3-hydroxyacyl-CoA dehydrogenase	118838	130845	115531	67257.2	74416.1	76450.8	102382	80941.4	90337.3
A0A068BER1;P21958;Q3TBA3;Q3U543;Q3U6V4;Q5D0F3;Q62428;Q62429;Q64333;Q78E61;Q9QWR3	A0A068BER1;P21958;Q3TBA3;Q3U543;Q3U6V4;Q5D0F3;Q62428;Q62429;Q64333;Q78E61;Q9QWR3	Tap1;Tap1;Tap1;Tap1;Tap1;Tap1;Tap1;Tap1;Tap1;Tap1;Tap-1	ABC-type antigen peptide transporter;Antigen peptide transporter 1;Transporter 1, ATP-binding cassette, sub-family B (MDR/TAP);ABC-type antigen peptide transporter;ABC-type antigen peptide transporter;ABC-type antigen peptide transporter;ABC-type antigen peptide transporter;ABC-type antigen peptide transporter;ABC-type antigen peptide transporter;ABC-type antigen peptide transporter;Tap-1 protein…	9470.62	9616.56	10440.1	13573.6	20923.2	19552.3	19918.6	21957.4	22703.1
A0A068BFR3;E9Q3P9;F8WGS1;G3UY29;P46638;P62492;Q0PD45;Q78ZJ8	A0A068BFR3;E9Q3P9;F8WGS1;G3UY29;P46638;P62492;Q0PD45;Q78ZJ8	Rab11b;Rab11a;Rab11a;Rab11b;Rab11b;Rab11a;Rab11a;Rab11b	RAS oncogene family protein;RAB11A, member RAS oncogene family;RAB11A, member RAS oncogene family (Fragment);RAB11B, member RAS oncogene family;Ras-related protein Rab-11B;Ras-related protein Rab-11A;Rab11A;RAB11B protein	9441.9	11901.5	12660.6	8948.86	10296.9	9560.54	9212.09	12138.9	7608.09
A0A068BFS4;O35730	A0A068BFS4;O35730	Ring1	RING-type E3 ubiquitin transferase;E3 ubiquitin-protein ligase RING1	9526.27	11957.1	13042.8	9945.83	8052.75	6730.2	4252.03	6466.42	6462.32
A0A068BFU4;A0A2Z4SWZ4;A0A2Z4SWZ5;A0A2Z4SWZ8;A0A2Z4SX04;A0A2Z4SX15;A0A2Z4SX16;A0A2Z4SX17;A0A2Z4SX26;A0A2Z4SX54;A0A2Z4SX81;A0A2Z4SX90;A0A2Z4SXB5;A0A2Z4SXC6;A0A2Z4SY32;A0A2Z4SY53;A0A2Z4SYI8;A0A2Z4SYN0;A0A2Z4SYP0;A0A2Z4SYQ8;A0A2Z4SYS8;A0A2Z4SYT7;A0A2Z4T169;A0A2Z4T188;A0A2Z4T196;A0A2Z4T259;A0A2Z4T270;A0A2Z4T282;A0A2Z4T2A8;A0A2Z4T397;A0A2Z4T3A7;A0A498U6I0;E5FDC7;E5FDC8;E5FDD1;E5FDD2;E5FDD4;E5FDD5;E5FDD…	A0A068BFU4;A0A2Z4SWZ4;A0A2Z4SWZ5;A0A2Z4SWZ8;A0A2Z4SX04;A0A2Z4SX15;A0A2Z4SX16;A0A2Z4SX17;A0A2Z4SX26;A0A2Z4SX54;A0A2Z4SX81;A0A2Z4SX90;A0A2Z4SXB5;A0A2Z4SXC6;A0A2Z4SY32;A0A2Z4SY53;A0A2Z4SYI8;A0A2Z4SYN0;A0A2Z4SYP0;A0A2Z4SYQ8;A0A2Z4SYS8;A0A2Z4SYT7;A0A2Z4T169;A0A2Z4T188;A0A2Z4T196;A0A2Z4T259;A0A2Z4T270;A0A2Z4T282;A0A2Z4T2A8;A0A2Z4T397;A0A2Z4T3A7;A0A498U6I0;E5FDC7;E5FDC8;E5FDD1;E5FDD2;E5FDD4;E5FDD5;E5FDD…	H2-Ab1;H2-Eb1;H2-Eb1;H2-Ab1;H2-Eb1;H2-Eb1;H2-Eb1;H2-Ab1;H2-Eb1;H2-Ab1;H2-Eb1;H2-Eb1;H2-Eb1;H2-Eb1;H2-Eb1;H2-Eb1;H2-Eb1;H2-Eb1;H2-Eb1;H2-Eb1;H2-Eb1;H2-Eb1;H2-Eb1;H2-Eb1;H2-Eb1;H2-Eb1;H2-Eb1;H2-Eb1;H2-Eb1;H2-Eb1;H2-Eb1;H2-Eb1;H2-Eb1;H2-Eb1;H2-Eb1;H2-Eb1;H2-Eb1;H2-Eb1;H2-Eb1;H2-Eb1;H2-Eb1;H2-Eb;H2-Eb;H2-Eb;H2-Eb;H2-Eb;H2-Eb;H2-Eb;H2-Eb;H2-Eb;H2-Eb;H2-Eb;H2-Eb;H2-Eb;H2-Eb;H2-Eb1;H2-Eb1;H2-Eb1;;H2-Eb1…	MHC class II antigen A beta 1;MHC class II antigen E beta (Fragment);MHC class II antigen E beta (Fragment);MHC class II antigen A beta 1 (Fragment);MHC class II antigen E beta (Fragment);MHC class II antigen E beta (Fragment);MHC class II antigen E beta (Fragment);MHC class II antigen A beta 1 (Fragment);MHC class II antigen E beta (Fragment);MHC class II antigen A beta 1 (Fragment);MHC class II…	8932.29	7721.57	4812.09	491.777	498.957	2276.52	878.595	2797.71	3411.53
A0A068BIR7;Q9Z1P7	A0A068BIR7;Q9Z1P7	Kank3	KN motif and ankyrin repeat domains 3;KN motif and ankyrin repeat domain-containing protein 3	3898.5	1756.61	3037.45	6433.73	2729.57	5003.56	674.068	1243.71	2844.26
A0A068BIS1;Q3TCU5;Q3TED6;Q3U7C1;Q3U9A3;Q5XW48;Q5XW49;Q5XW51;Q5XW52;Q91WI5;Q9D679;Q9R233	A0A068BIS1;Q3TCU5;Q3TED6;Q3U7C1;Q3U9A3;Q5XW48;Q5XW49;Q5XW51;Q5XW52;Q91WI5;Q9D679;Q9R233	Tapbp	TAP binding protein;TAP binding protein;Ig-like domain-containing protein;Ig-like domain-containing protein (Fragment);Ig-like domain-containing protein;Tapasin (Fragment);Tapasin (Fragment);Tapasin (Fragment);Tapasin (Fragment);TAP binding protein;Ig-like domain-containing protein;Tapasin	9192.49	10978.5	8917.41	3661.38	2730.41	4589.41	4171.39	2619.42	3692.06
A0A068BIT0;Q14C53;Q31125	A0A068BIT0;Q14C53;Q31125	Slc39a7	Solute carrier family 39;Solute carrier family 39 (Zinc transporter), member 7;Zinc transporter SLC39A7	2205.97	1187.94	1262.04	968.952		95.1421		1789.91	1978.36
A0A068BIT8;P28063	A0A068BIT8;P28063	Psmb8	Proteasome subunit beta;Proteasome subunit beta type-8	4466.71	3412.17	3768.83	1459.09	2441.88	5393.44	3183.25		2883.5
A0A068EW80;D3YXR5;D3Z3A6;Q60953	A0A068EW80;D3YXR5;D3Z3A6;Q60953	Pml	Promyelocytic leukemia;Promyelocytic leukemia;Promyelocytic leukemia;Protein PML	273898	268588	231650	215349	195227	204310	194109	222741	243157
A0A075B5P3;A0A0A6YVP0;A0A0F7QZE4;A0A0F7R1P3;A0A4V6JA63;Q569X1;Q8R3H6;Q91Z05	A0A075B5P3;A0A0A6YVP0;A0A0F7QZE4;A0A0F7R1P3;A0A4V6JA63;Q569X1;Q8R3H6;Q91Z05	Ighg2b;Ighg2b;HC;HC;Ighg2b;Ighg;Ighg;Ighg	Immunoglobulin heavy constant gamma 2B (Fragment);Immunoglobulin heavy constant gamma 2B (Fragment);MAb 110 heavy chain;MAb 106 heavy chain;IgG2b;Ighg protein;Ighg protein;Ighg protein	10317.7	4519.87	5841.35	3962.09	4348.59	5125.55	2931.55	2630.04	2716.76
A0A075B5P4;A0A0A6YWR2;A0A0B6VMB2;A0A0C6E3V3;A0A4U9FFL2	A0A075B5P4;A0A0A6YWR2;A0A0B6VMB2;A0A0C6E3V3;A0A4U9FFL2	Ighg1;Ighg1;HC;HC;Ighg1	Immunoglobulin heavy constant gamma 1 (G1m marker) (Fragment);Immunoglobulin heavy constant gamma 1 (G1m marker) (Fragment);MAb 31C6 heavy chain;HC protein;IgG1	1219.13	1093.58	644.272	2416.1	2096.3	2035.49	1126.67	1115.2	271.755
A0A075B5P5;A0A1Y7VJN6;A0A4U9FKB1;P03987	A0A075B5P5;A0A1Y7VJN6;A0A4U9FKB1;P03987	Ighg3;Ighg3;Ighg3;	Immunoglobulin heavy constant gamma 3 (Fragment);Immunoglobulin heavy constant gamma 3 (Fragment);IgG3;Ig gamma-3 chain C region	2004.07		138.701	2327.75	2321.64	2624.92		3354.5	7817.31
A0A075B5P6;A0A075B6A0;P01872	A0A075B5P6;A0A075B6A0;P01872	Ighm	Immunoglobulin heavy constant mu (Fragment);Immunoglobulin heavy constant mu (Fragment);Immunoglobulin heavy constant mu	2045.63	1076.07	556.348	1090.56	1752.25	1378.34	407.598
A0A075B5V1;A0A075B5V6;A0A0M4LB22;P01756;P01757;P06330;Q9QXE9;Q9QXF0	A0A075B5V1;A0A075B5V6;A0A0M4LB22;P01756;P01757;P06330;Q9QXE9;Q9QXF0	Ighv1-31;Ighv1-42;;;;;;	Immunoglobulin heavy variable 1-31;Immunoglobulin heavy variable V1-42;B2 12-1 anti-human butyrylcholinesterase (BChE) heavy chain variable region (Fragment);Ig heavy chain V region MOPC 104E;Ig heavy chain V region J558;Ig heavy chain V region AC38 205.12;Immunoglobulin heavy chain V-D-J region (Fragment);Immunoglobulin heavy chain V-D-J region (Fragment)
A0A075F5C6;A0A075F6C2;A0A075F882;A0A075F891;A0A2I3BR06;A0A2R8W6L8;P38532;Q52L52	A0A075F5C6;A0A075F6C2;A0A075F882;A0A075F891;A0A2I3BR06;A0A2R8W6L8;P38532;Q52L52	Hsf1	Heat shock factor 1;Heat shock transcription factor 1 gammaalpha isoform;Heat shock transcription factor 1 beta isoform;Heat shock transcription factor 1 alpha isoform;Heat shock factor 1 (Fragment);Heat shock factor 1;Heat shock factor protein 1;Heat shock factor 1				8435.2	7411.4	7335.52	5570.41	3454.21	2683.24
A0A077S9N1;P17897	A0A077S9N1;P17897	Lyz1	Lysozyme f3;Lysozyme C-1	21300.9	15447.7	8794.91	3437.66	1855.26	3240.63
A0A087WNL7;A0A087WNX7;A0A087WP63;A0A087WQ44	A0A087WNL7;A0A087WNX7;A0A087WP63;A0A087WQ44	Srcap;Srcap;Gm42715;Srcap	Snf2-related CREBBP activator protein;Snf2-related CREBBP activator protein;Predicted gene 42715 (Fragment);Snf2-related CREBBP activator protein	483.87	1192.43	774.003	1236.77	1242.74	1370.18	1364.45	911.186	977.566
A0A087WNM2;A0A087WQ57;Q8VI33	A0A087WNM2;A0A087WQ57;Q8VI33	Taf9	TATA-box binding protein associated factor 9 (Fragment);TATA-box binding protein associated factor 9 (Fragment);Transcription initiation factor TFIID subunit 9	11694.4	14031.8	16292.1	10657.5	12036.2	10467.4	12216.9	11553.8	9308.31
A0A087WNN1;A0A087WRG1;A0A087WRU9;Q8BVM7	A0A087WNN1;A0A087WRG1;A0A087WRU9;Q8BVM7	Flacc1	Flagellum associated containing coiled-coil domains 1;Flagellum associated containing coiled-coil domains 1;Flagellum associated containing coiled-coil domains 1;Flagellum-associated coiled-coil domain-containing protein 1	1120.05	2321.39	2761.51		2122.34
A0A087WNP6;A0A087WRM0;A0A087WS49;F8WGL9;Q4VAA2	A0A087WNP6;A0A087WRM0;A0A087WS49;F8WGL9;Q4VAA2	Cdv3	Carnitine deficiency-associated gene expressed in ventricle 3;Carnitine deficiency-associated gene expressed in ventricle 3 (Fragment);Carnitine deficiency-associated gene expressed in ventricle 3;Carnitine deficiency-associated gene expressed in ventricle 3;Protein CDV3			1619.13		1256.08	2141.61
A0A087WNU9;A0A087WPP8;P62484;Q6AXD2;Q6AXH6	A0A087WNU9;A0A087WPP8;P62484;Q6AXD2;Q6AXH6	Abi2	Abl interactor 2 (Fragment);Abl interactor 2;Abl interactor 2;Abi2 protein;Abi2 protein	5821.11	6417.15		5851.01	7874.15	8623.41	8068.66	10088.4	7195.98
A0A087WNV1;A0A087WR52;A0A087WRL1;A0A087WSR7;Q8K2K6	A0A087WNV1;A0A087WR52;A0A087WRL1;A0A087WSR7;Q8K2K6	Agfg1	ArfGAP with FG repeats 1;ArfGAP with FG repeats 1 (Fragment);ArfGAP with FG repeats 1 (Fragment);ArfGAP with FG repeats 1;Arf-GAP domain and FG repeat-containing protein 1	13911.9	18684.2	20117.1	51599.9	56778	50417.9	31113.7	31043.4	28386.1
A0A087WNX0;A0A087WQT5;A0A087WRS6;G5E886;G5E887;Q80ST9	A0A087WNX0;A0A087WQT5;A0A087WRS6;G5E886;G5E887;Q80ST9	Lca5	Leber congenital amaurosis 5 (human) (Fragment);Leber congenital amaurosis 5 (human) (Fragment);Leber congenital amaurosis 5 (human);Leber congenital amaurosis 5 (human);Leber congenital amaurosis 5 (human);Lebercilin		729.929		1692.63					1979.89
A0A087WNX9;Q91YN9	A0A087WNX9;Q91YN9	Bag2	BCL2-associated athanogene 2;BAG family molecular chaperone regulator 2	1592.56	8019.33	3888.08			1319.07	2689.49
A0A087WNY4;A0A087WQ51;A0A087WQ74;P81183	A0A087WNY4;A0A087WQ51;A0A087WQ74;P81183	Ikzf2	IKAROS family zinc finger 2;IKAROS family zinc finger 2;IKAROS family zinc finger 2;Zinc finger protein Helios	4809.01		11538.9		5656.78	808.01	4277.66		2869.31
A0A087WNZ7;G5E870	A0A087WNZ7;G5E870	Trip12	E3 ubiquitin-protein ligase;E3 ubiquitin-protein ligase TRIP12	154921	148738	186921	189691	169379	193220	157884	187175	178588
A0A087WP13;A0A087WRB7;E9PX43;Q3UEX8;Q69ZU4;Q7TQG1	A0A087WP13;A0A087WRB7;E9PX43;Q3UEX8;Q69ZU4;Q7TQG1	Plekha6	Pleckstrin homology domain containing, family A member 6 (Fragment);Pleckstrin homology domain containing, family A member 6;Pleckstrin homology domain containing, family A member 6;Pleckstrin homology domain-containing family A member 6 (Fragment);MKIAA0969 protein (Fragment);Pleckstrin homology domain-containing family A member 6	16104.4	17285.2	17705	10956.5	12390.1	12503	11381.5	11048.5	11476.6
A0A087WP14;A0A087WP48;A0A087WP85;A0A087WPW5;A0A087WPX0;A0A087WQ25;A0A087WQD0;A0A087WRS1;F8VQC7;Q61595	A0A087WP14;A0A087WP48;A0A087WP85;A0A087WPW5;A0A087WPX0;A0A087WQ25;A0A087WQD0;A0A087WRS1;F8VQC7;Q61595	Ktn1	Kinectin 1;Kinectin 1;Kinectin 1;Kinectin 1;Kinectin 1;Kinectin 1;Kinectin 1;Kinectin 1;Kinectin 1;Kinectin	7166.03	8644.45	9300.47	4174.1	5080.54	3317.89	10202.5	1401.21	2354.44
A0A087WP33;Q68FE2	A0A087WP33;Q68FE2	Atg9a	Autophagy-related protein 9 (Fragment);Autophagy-related protein 9A	3077.93	12000.3	3727.93	2738.42	3904.05	3708.5	2697.92	3413.33	3622.81
A0A087WP46;F6T2X5;Q6ZPL5;Q8K058	A0A087WP46;F6T2X5;Q6ZPL5;Q8K058	BC034090	cDNA sequence BC034090;cDNA sequence BC034090;MKIAA1614 protein (Fragment);BC034090 protein (Fragment)	734.407	1165.84	250.775	967.031		2.35309		392.708
A0A087WP74;B2KFD2;Q5DTW7	A0A087WP74;B2KFD2;Q5DTW7	Resf1	Retroelement silencing factor 1;2810474O19Rik protein;Retroelement silencing factor 1	9902.29	5858.6	6493.6	5871.3	5136.91	7712.16	2894.25		3659.54
A0A087WP91;A0A087WPB6;F8WJ74;Q8VEF1	A0A087WP91;A0A087WPB6;F8WJ74;Q8VEF1	Gramd1a	GRAM domain containing 1A;GRAM domain containing 1A (Fragment);GRAM domain containing 1A;Protein Aster-A	1264.7	4367.31	3885.2	4617.58	3665.96	4272.39	6947.81	3176.84	4528.51
A0A087WPF5;E0CY18;Q91X58	A0A087WPF5;E0CY18;Q91X58	Zfand2b	Zinc finger, AN1 type domain 2B (Fragment);Zinc finger, AN1 type domain 2B (Fragment);AN1-type zinc finger protein 2B	3897.54	1761.05	2744.23	4892.94	5419.69	3884.88	6995.87	9749.76	6096.36
A0A087WPN6	A0A087WPN6	Ptma	Prothymosin alpha	206.589	1535.22					4494.98	6804.42
A0A087WPR7	A0A087WPR7	Dst	Dystonin (Fragment)	17956.1	25812.4	25462.3	5093.37	7222.6	8450.71	9025.91	8157.23	6863.23
A0A087WPT7;Q6P549	A0A087WPT7;Q6P549	Inppl1	phosphatidylinositol-3,4,5-trisphosphate 5-phosphatase (Fragment);Phosphatidylinositol 3,4,5-trisphosphate 5-phosphatase 2	34336.6	64279.2	45228.4	71040	42930	22001.2	9893.68	18986.2	34556.8
A0A087WPY7;J3QK27;O35698	A0A087WPY7;J3QK27;O35698	Gm29289;Gm21693;Rbmy1a1	Predicted gene 29289 (Fragment);Predicted gene, 21693;RNA-binding motif protein, Y chromosome, family 1 member A1	2054.74	1440.93
A0A087WQ84;Q6PB97	A0A087WQ84;Q6PB97	Fbxl19	F-box and leucine-rich repeat protein 19;F-box/LRR-repeat protein 19	8439.5	5686.82	5332.57	3314.21	4472.61	4183.22	1804.43		2601.86
A0A087WQA5;A0A087WRP4;A0A087WRZ5;A0A087WSH7;C9DT14;H3BJV1;Q05C33;Q544R5;Q6VYI4;Q6VYI5;Q8BLD4;Q8BUM1;Q8R0B4;Q921F2	A0A087WQA5;A0A087WRP4;A0A087WRZ5;A0A087WSH7;C9DT14;H3BJV1;Q05C33;Q544R5;Q6VYI4;Q6VYI5;Q8BLD4;Q8BUM1;Q8R0B4;Q921F2	Tardbp	TAR DNA binding protein (Fragment);TAR DNA binding protein (Fragment);TAR DNA-binding protein 43;TAR DNA binding protein (Fragment);TAR DNA-binding protein 43;TAR DNA binding protein (Fragment);TAR DNA-binding protein 43;TAR DNA-binding protein 43;TAR DNA-binding protein 43;TAR DNA-binding protein 43;TAR DNA-binding protein 43;TAR DNA-binding protein 43;TAR DNA-binding protein 43;TAR DNA-binding …	2794.7	1265.6	2936.66	1137.56	2526.44	3240.41	2747.09	1935.2	1406.77
A0A087WQE8;E9Q9G6;E9QAN4;G3UW47;P33173;Q3UH16;Q5DTN3;Q6P5H4;Q6TA13	A0A087WQE8;E9Q9G6;E9QAN4;G3UW47;P33173;Q3UH16;Q5DTN3;Q6P5H4;Q6TA13	Kif1a	Kinesin family member 1A;Kinesin family member 1A;Kinesin family member 1A;Kinesin family member 1A;Kinesin-like protein KIF1A;Kinesin-like protein KIF1A;MKIAA4102 protein (Fragment);Kif1a protein;Kinesin family member 1A	8767.99	14979.7	12402.1	4904.24	5768.47	4841.81	6944.41	5001.08	5155.72
A0A087WQN7;F8VQ87;P97789	A0A087WQN7;F8VQ87;P97789	Xrn1	5'-3' exoribonuclease 1
A0A087WQS0;A0A1D5RM59;E9Q0S6	A0A087WQS0;A0A1D5RM59;E9Q0S6	Tns1	Tensin 1;Tensin 1;Tensin-1	43566.7	42471.1	42273.3	22656.9	21559.8	23636.7	28161.6	28454.4	29108.8
A0A087WQS1;A0A087WR70;Q3U907;Q3U9B2;Q3U9H2;Q8VEK1;Q9ERE3	A0A087WQS1;A0A087WR70;Q3U907;Q3U9B2;Q3U9H2;Q8VEK1;Q9ERE3	Sgk3	Serum/glucocorticoid regulated kinase 3;Serum/glucocorticoid regulated kinase 3;Serine/threonine-protein kinase Sgk3;Serine/threonine-protein kinase Sgk3;Serine/threonine-protein kinase Sgk3;Sgk3 protein;Serine/threonine-protein kinase Sgk3	7154.95	4755.85	4398.11	4096.35	4776.54	3194.43	3392.37	4207.2	2869.38
A0A087WQS2;Q9CQC6	A0A087WQS2;Q9CQC6	Bzw1	Basic leucine zipper and W2 domains 1;eIF5-mimic protein 2	14038.4	13177.5	14771.4	27392.1	29344.3	27959.5	20476.6	25696.2	27148.5
A0A087WQS3;Q8BRM2	A0A087WQS3;Q8BRM2	Gorab	Golgin, RAB6-interacting;RAB6-interacting golgin	36783.3	33997.8	33198.6	15984.5	12447.6	13035.9	13636.9	14651.9	8450.37
A0A087WQS5;P56383;P56384;Q14BC2;Q9CR84	A0A087WQS5;P56383;P56384;Q14BC2;Q9CR84	Atp5g2;Atp5mc2;Atp5mc3;Atp5g3;Atp5mc1	ATP synthase, H+ transporting, mitochondrial F0 complex, subunit C2 (subunit 9) (Fragment);ATP synthase F(0) complex subunit C2, mitochondrial;ATP synthase F(0) complex subunit C3, mitochondrial;ATP synthase lipid-binding protein;ATP synthase F(0) complex subunit C1, mitochondrial	10014.1	8871.74	9906.36	7322.59	5990.87	7137.19	6650.26	6262.87	6342.64
A0A087WQT6;O89110;Q3U607	A0A087WQT6;O89110;Q3U607	Casp8	Caspase 8;Caspase-8;Caspase-8	102100	14079.9	85669.1	48499.5	30305.6	25510.6	33855.3	33676	32251.8
A0A087WQU0;Q8C134;Q9ERD6	A0A087WQU0;Q8C134;Q9ERD6	Ralgps2	Ral GEF with PH domain and SH3 binding motif 2;Ral GEF with PH domain and SH3 binding motif 2;Ras-specific guanine nucleotide-releasing factor RalGPS2	21926.7	15022.4	15577.5	25200.5	25100	27799.3	20501.2	18932	21502
A0A087WR05;G3UWD2;G3X9W7;Q03347;Q3UM65;Q6NSS1	A0A087WR05;G3UWD2;G3X9W7;Q03347;Q3UM65;Q6NSS1	Runx1	Runt related transcription factor 1 (Fragment);Runt-related transcription factor;Runt-related transcription factor;Runt-related transcription factor 1;Runt-related transcription factor;Runt-related transcription factor	1588.23	971.75		15242	14211.4	14564.4	18219.3	16137.3	15504.7
A0A087WR20;P49935;Q922Q7	A0A087WR20;P49935;Q922Q7	Ctsh	Cathepsin H (Fragment);Pro-cathepsin H;Cathepsin H	7762.94	6104.29	5462.88	1351.59	1898.48		2737.24	664.851	1363.78
A0A087WR45;Q3UKG2	A0A087WR45;Q3UKG2	Prob1	Proline rich basic protein 1;Proline rich basic protein 1 (Fragment)	86100	89807.5	91412.3	57732.3	50407.4	56878.2	54857.8	52601.4	53386.5
A0A087WR50;A0A087WS56;A0A087WSN6;B7ZNJ1;B9EHT6;Q3TCF1;Q3UGY5;Q3UH17;Q3UHL6	A0A087WR50;A0A087WS56;A0A087WSN6;B7ZNJ1;B9EHT6;Q3TCF1;Q3UGY5;Q3UH17;Q3UHL6	Fn1	Fibronectin	702.277	572.154	576.396	828.367	566.871	560.636	140.122	588.281	425.513
A0A087WR75;A0A0N4SVP5;Q7TT18	A0A087WR75;A0A0N4SVP5;Q7TT18	Atf7ip	Activating transcription factor 7 interacting protein (Fragment);Activating transcription factor 7 interacting protein (Fragment);Activating transcription factor 7-interacting protein 1	25335	27361	22443.7	25402.3	25866.8	29856.8	21919.3	20160.1	25098.9
A0A087WRE7;Q8R0N6	A0A087WRE7;Q8R0N6	Adhfe1	Hydroxyacid-oxoacid transhydrogenase, mitochondrial (Fragment);Hydroxyacid-oxoacid transhydrogenase, mitochondrial		10590.9	5496.29
A0A087WRF2;Q8BXK8	A0A087WRF2;Q8BXK8	Agap1	ArfGAP with GTPase domain, ankyrin repeat and PH domain 1;Arf-GAP with GTPase, ANK repeat and PH domain-containing protein 1	3336.23	1263.09	2655.54	3666.13	2972.77	2988.16	2974.48	3799.55	2736.94
A0A087WRG0;A0A087WRM7;B0FLL3;B2Z892;P70265;Q6GTL7	A0A087WRG0;A0A087WRM7;B0FLL3;B2Z892;P70265;Q6GTL7	Pfkfb2	6-phosphofructo-2-kinase/fructose-2,6-biphosphatase 2;6-phosphofructo-2-kinase/fructose-2,6-biphosphatase 2;6-phosphofructo-2-kinase/fructose-2, 6-bisphosphatase 2 transcript variant 2;6-phosphofructo-2-kinase/fructose-2, 6-bisphosphatase 2 variant 4;6-phosphofructo-2-kinase/fructose-2,6-bisphosphatase 2;6-phosphofructo-2-kinase/fructose-2, 6-biphosphatase 2	5391.5	7305.87	5989.79	9123.4	9912.42	9529.48	7017.67	8902.18	7228.3
A0A087WRG6;F6YST4;P97767;Q3TSE3;Q6NXW1;Q6PAJ8;Q8C9D0	A0A087WRG6;F6YST4;P97767;Q3TSE3;Q6NXW1;Q6PAJ8;Q8C9D0	Eya1	Eyes absent homolog (Fragment);Eyes absent homolog;Eyes absent homolog 1;Eyes absent homolog (Fragment);Eyes absent homolog;Eyes absent homolog;Eyes absent homolog	5043.46	6031.94	4777.88		862.188	1246.16	1258.71	2017.11
A0A087WRI6;Q01147;Q543W0;Q547S9;Q61442;Q62347	A0A087WRI6;Q01147;Q543W0;Q547S9;Q61442;Q62347	Creb1;Creb1;Creb1;Creb1;CREB;Creb1	cAMP responsive element binding protein 1;Cyclic AMP-responsive element-binding protein 1;Cyclic AMP-responsive element-binding protein 1;cAMP response element binding protein;C-AMP-responsive-element binding protein omega;M.musculus transcription factor/DNA binding protein	7423.16	7351.72	8109.72	9071.57	10550.4	10273.5	9965.29	10450.1	7441.93
A0A087WRM8;A0A087WSS1;E9QM90;G3X9J4;Q148V7	A0A087WRM8;A0A087WSS1;E9QM90;G3X9J4;Q148V7	Relch	RAB11 binding and LisH domain, coiled-coil and HEAT repeat containing;RAB11 binding and LisH domain, coiled-coil and HEAT repeat containing;RAB11 binding and LisH domain, coiled-coil and HEAT repeat containing;RAB11 binding and LisH domain, coiled-coil and HEAT repeat containing;RAB11-binding protein RELCH	19672	23008.3	19775.6	3926.67	6653.77	4313.4	5171.39	3969.39	5142.57
A0A087WRP5;A0A0R4J2B7;A0A2X0U4P8;B2RWY0;Q8BZN6	A0A087WRP5;A0A0R4J2B7;A0A2X0U4P8;B2RWY0;Q8BZN6	Dock10;Dock10;DOCK10;Dock10;Dock10	Dedicator of cytokinesis 10;Dedicator of cytokinesis 10 (Fragment);DOCK10 (Fragment);Dock10 protein;Dedicator of cytokinesis protein 10	16367.2	24378.7	14459.2	6630.92	6512.56	5615.4	7394.29	7972.13	7189.63
A0A087WRQ4;P63166;Q8BT45	A0A087WRQ4;P63166;Q8BT45	Sumo1;Sumo1;	Small ubiquitin-like modifier 1;Small ubiquitin-related modifier 1;Uncharacterized protein	322044	342834	350776	422504	416211	401704	276226	256530	277413
A0A087WRT4;A0A1L1SQU7;F2Z4A3;Q497H5;Q6X4A1;Q80VA2;Q80XT9	A0A087WRT4;A0A1L1SQU7;F2Z4A3;Q497H5;Q6X4A1;Q80VA2;Q80XT9	Fat1	FAT atypical cadherin 1;FAT atypical cadherin 1;FAT atypical cadherin 1;Fat1 protein (Fragment);FATH protein (Fragment);Fat1 protein (Fragment);Fat1 protein (Fragment)	3098.41		1945.91	3070.58	3367.77	2991.93
A0A087WRX1;H3BIW7;H3BKI4;Q9D2X8	A0A087WRX1;H3BIW7;H3BKI4;Q9D2X8	9130401M01Rik;Gm29394;Gm29394;	RIKEN cDNA 9130401M01 gene (Fragment);Predicted gene 29394;Predicted gene 29394 (Fragment);Uncharacterized protein C8orf76 homolog
A0A087WRZ9;Q3UR85	A0A087WRZ9;Q3UR85	Myrf	Myelin regulatory factor (Fragment);Myelin regulatory factor	1921.83	1252.78		1899.82	2165.2	2327.71	399.175	1215.18	2304.69
A0A087WS16;J3QQ16	A0A087WS16;J3QQ16	Col6a3	Collagen, type VI, alpha 3;Collagen, type VI, alpha 3	178217	162144	181537	132742	130767	137223	96275.9	97657.2	93594.6
A0A087WS18;B2RY22;E9Q6L0;J3QP81	A0A087WS18;B2RY22;E9Q6L0;J3QP81	Clasp1	CLIP associating protein 1;Clasp1 protein;CLIP associating protein 1;CLIP associating protein 1	4219.09	5003.55	2847.71	7409.32	8973.84	8643.54	5900.71	6873.9	7817.02
A0A087WS31;A0A087WSE6;Q3TVK3;Q3U3I6;Q8BPW9;Q8CAJ7;Q9Z2W0	A0A087WS31;A0A087WSE6;Q3TVK3;Q3U3I6;Q8BPW9;Q8CAJ7;Q9Z2W0	Dnpep;Dnpep;Dnpep;;Dnpep;Dnpep;Dnpep	Aspartyl aminopeptidase (Fragment);Aspartyl aminopeptidase (Fragment);Aspartyl aminopeptidase;Aspartyl aminopeptidase;Aspartyl aminopeptidase;Aspartyl aminopeptidase;Aspartyl aminopeptidase	795.484	696.86	273.157		326.679	440.731		1496.53
A0A087WS46;O70251	A0A087WS46;O70251	Eef1b2;Eef1b	Eukaryotic translation elongation factor 1 beta 2;Elongation factor 1-beta	40608.6	33653.2	34624.2	16441.4	15894.8	17540.3	8705.92	10385.8	7687.18
A0A087WSB8;Q9DCB1	A0A087WSB8;Q9DCB1	Hmgn3	High mobility group nucleosomal binding domain 3;High mobility group nucleosome-binding domain-containing protein 3	17662.3	14779.1	15395	17578.7	16350.3	21371.3	42987.7	33182.4	34493.6
A0A087WSE3;E9QQ25;Q62407	A0A087WSE3;E9QQ25;Q62407	Speg	SPEG complex locus (Fragment);SPEG complex locus;Striated muscle-specific serine/threonine-protein kinase	106445	112264	108259	56534.8	59044.5	58963.7	103288	101159	104252
A0A087WSI8;A0A0R4J0I6;D3YTQ5;Q80XL6	A0A087WSI8;A0A0R4J0I6;D3YTQ5;Q80XL6	Acad11	Acyl-Coenzyme A dehydrogenase family, member 11;Acyl-Coenzyme A dehydrogenase family, member 11;Acyl-Coenzyme A dehydrogenase family, member 11;Acyl-CoA dehydrogenase family member 11	2374.75	427.698	2427.29	2550.28	3565.27	4536.52	2120.72		1320.99
A0A087WSP5;P42225;Q3TW11;Q8C3V4;Q8C497;Q8C8M3;Q99K94;Q9D323	A0A087WSP5;P42225;Q3TW11;Q8C3V4;Q8C497;Q8C8M3;Q99K94;Q9D323	Stat1	Signal transducer and activator of transcription;Signal transducer and activator of transcription 1;Signal transducer and activator of transcription;Signal transducer and activator of transcription;Signal transducer and activator of transcription;Signal transducer and activator of transcription;Signal transducer and activator of transcription;Signal transducer and activator of transcription	17904.8	14353.3	20190.9	5921.87	10917.9	4363.68	7546.39	10844.3	22755.4
A0A087WST2;A0A0R4J2B6;Q8BX09	A0A087WST2;A0A0R4J2B6;Q8BX09	Rbbp5	Retinoblastoma binding protein 5, histone lysine methyltransferase complex subunit;Retinoblastoma binding protein 5, histone lysine methyltransferase complex subunit;Retinoblastoma-binding protein 5	1241.81		273.699	307.627
A0A088MLT8;A0A097PIJ2;A0A0A6YXQ5;P0DPB4;S4R1J0	A0A088MLT8;A0A097PIJ2;A0A0A6YXQ5;P0DPB4;S4R1J0	Iqcj-Schip1;Schip1;Schip1;Schip1;Schip1	IQCJ-SCHIP1 readthrough transcript protein;Schwannomin interacting protein 1 isoform c;Schwannomin interacting protein 1 (Fragment);Schwannomin-interacting protein 1;Schwannomin interacting protein 1	4493.43	3437.07	6635.44	471.045	1580.11	656.347		842.856	2459.45
A0A097PUD0;A0A097PUG4	A0A097PUD0;A0A097PUG4		Anti-dectin-1 15E2 light chain;Anti-lox-1 15C4 light chain	1.99893e+06	21610.4	260499	115437	60984	50826.3	6983.41	3836.93	3247.68
A0A097PUG1;A0A097PUH2;A0A4E9FU10	A0A097PUG1;A0A097PUH2;A0A4E9FU10	;;IGHG4	Anti-lox-1 15C4 heavy chain;Anti-dectin-1 15E2 heavy chain;IgG4 (Fragment)	20449	7711.57	5032.75	2430.64	1851.51	3968.26			72425.9
A0A0A0MQ73;Q6PDK2	A0A0A0MQ73;Q6PDK2	Kmt2d	[histone H3]-lysine(4) N-methyltransferase;Histone-lysine N-methyltransferase 2D	22258.2	16120.9	19850.6	19391.7	16869.6	18691.6	15223.9	13933.2	11753.6
A0A0A0MQ79;Q3TLH4;S4R294;S4R2J9	A0A0A0MQ79;Q3TLH4;S4R294;S4R2J9	Prrc2c	Proline-rich coiled-coil 2C;Protein PRRC2C;Proline-rich coiled-coil 2C;Proline-rich coiled-coil 2C	21277.2	16254.3	17546	15715.9	16110	14285.8	12008.8	10862.9	12550.8
A0A0A0MQ80;A0A0G2JFY0;B7ZNK9;Q3UMC0	A0A0A0MQ80;A0A0G2JFY0;B7ZNK9;Q3UMC0	Spata5;Spata5;Spata5;Afg2a	vesicle-fusing ATPase;Spermatogenesis associated 5;Spata5 protein;ATPase family gene 2 protein homolog A		1441.51	2561.74	5283.58	5280.9	5650	4167.64	5561.6	2098.89
A0A0A0MQ82;Q9WTR2	A0A0A0MQ82;Q9WTR2	Map3k6	mitogen-activated protein kinase kinase kinase;Mitogen-activated protein kinase kinase kinase 6	1643.28	340.204	851.892	1406.66	1921.57	2236.12		688.592
A0A0A0MQ84;Q9JJF6	A0A0A0MQ84;Q9JJF6	Efcc1	EF hand and coiled-coil domain containing 1;EF-hand and coiled-coil domain-containing protein 1	6156.01	6949.73	6084.37		3149.36		580.793		628.414
A0A0A0MQ88;Q8BTD8;Q8K165;Q8K4R4	A0A0A0MQ88;Q8BTD8;Q8K165;Q8K4R4	Pitpnc1	Phosphatidylinositol transfer protein, cytoplasmic 1;Cytoplasmic phosphatidylinositol transfer protein 1 (Fragment);Pitpnc1 protein;Cytoplasmic phosphatidylinositol transfer protein 1	381424	386005	321322
A0A0A0MQ90;P97352;Q545H7	A0A0A0MQ90;P97352;Q545H7	S100a13	Protein S100-A13;Protein S100-A13;S100/CaBP-9k-type calcium binding subdomain domain-containing protein	12947.8	15627.8	12096.6				7868.67	9963.74	10610.5
A0A0A0MQ95;B2RUJ8;Q8C0D4;Q9CZD7;S4R1B0;S4R203;S4R221;S4R248	A0A0A0MQ95;B2RUJ8;Q8C0D4;Q9CZD7;S4R1B0;S4R203;S4R221;S4R248	Arhgap12	Rho GTPase activating protein 12;Rho GTPase activating protein 12;Rho GTPase-activating protein 12;Rho GTPase-activating protein 12 (Fragment);Rho GTPase activating protein 12 (Fragment);Rho GTPase activating protein 12;Rho GTPase activating protein 12;Rho GTPase activating protein 12	7382.9	8609.78	8421.13	9816.01	9723.09	7954.52	6020.52	2582.65	5092.48
A0A0A0MQ97;G3X9C2	A0A0A0MQ97;G3X9C2	Nccrp1	Non-specific cytotoxic cell receptor protein 1 homolog (zebrafish);F-box only protein 50	222365	238353	189454	231035	388177	336679	162178	184012	175000
A0A0A0MQ98;G3UZM1;Q69ZK6	A0A0A0MQ98;G3UZM1;Q69ZK6	Jmjd1c	Jumonji domain containing 1C;Jumonji domain containing 1C;Probable JmjC domain-containing histone demethylation protein 2C	13344.8	13070.5	11088.6	12935.2	14127.9	12742.1	9527.6	11429.2	14051
A0A0A0MQA3;A0A0R4J0X5;P07758	A0A0A0MQA3;A0A0R4J0X5;P07758	Serpina1a;Serpina1c;Serpina1a	Serine (or cysteine) peptidase inhibitor, clade A, member 1A;Serine (or cysteine) peptidase inhibitor, clade A, member 1C;Alpha-1-antitrypsin 1-1	17819.8	14974	18145.3	7313.63	8519.33	8627.27	7024.41	7075.76	8918.08
A0A0A0MQA5;P68368	A0A0A0MQA5;P68368	Tuba4a	Tubulin alpha chain (Fragment);Tubulin alpha-4A chain	41347.2	35240.8	31913.1	17901.5	18869.4	15269.9	2219.79	2917.25	2439.33
A0A0A0MQB8;H3BLB6;Q3UJ00;Q60954;V9GXB5	A0A0A0MQB8;H3BLB6;Q3UJ00;Q60954;V9GXB5	Meis1	Meis homeobox 1;Meis homeobox 1;Homeobox domain-containing protein;Homeobox protein Meis1;Meis homeobox 1 (Fragment)	1771.17	905.533	375.211	90.1324		508.444	605.137	425.805
A0A0A0MQC3;A0A1B0GR99;A0A1B0GSD0;Q9CRB3	A0A0A0MQC3;A0A1B0GR99;A0A1B0GSD0;Q9CRB3	Urah	5-hydroxyisourate hydrolase;5-hydroxyisourate hydrolase (Fragment);Transthyretin (Fragment);5-hydroxyisourate hydrolase	3613.09	4873.82	3316.05	2550.66	2328.39	3293.78	2427.59	4368.62	3554.82
A0A0A0MQC7;A2A5Y6;P10637	A0A0A0MQC7;A2A5Y6;P10637	Mapt	Microtubule-associated protein;Microtubule-associated protein;Microtubule-associated protein tau	39279.7	45870.5	40277.3	35090.2	34347.5	33774.3	25583.9	30350.6	26702.2
A0A0A0MQD4;Q3U339;Q3ULW9;Q3UMU2;Q8K201	A0A0A0MQD4;Q3U339;Q3ULW9;Q3UMU2;Q8K201	9530068E07Rik;9530068E07Rik;9530068E07Rik;9530068E07Rik;Kct2	RIKEN cDNA 9530068E07 gene;Keratinocyte-associated transmembrane protein 2;Keratinocyte-associated transmembrane protein 2;Keratinocyte-associated transmembrane protein 2;Keratinocyte-associated transmembrane protein 2	11863.9	11994.9	10439.8	8886.2	10774.4	11090.4	3431.32	11960.8	10458
A0A0A0MQD7;A0A2I3BPN8;A3KGS3;F7CGP0	A0A0A0MQD7;A0A2I3BPN8;A3KGS3;F7CGP0	Ralgapa2	Ral GTPase activating protein, alpha subunit 2 (catalytic);Ral GTPase activating protein, alpha subunit 2 (catalytic);Ral GTPase-activating protein subunit alpha-2;Ral GTPase activating protein, alpha subunit 2 (catalytic) (Fragment)	10438.6	1494.18	6098.67	8928.25	7666.48	9007.7	2111.09	2345.87	1695.27
A0A0A0MQE0;A0A0A0MQM6;A0A0R4J1Z4;E9Q6Z8;F8VQL7;I1E4X2;P25425;P31362;P70260;Q3U5D1;Q7TSC9	A0A0A0MQE0;A0A0A0MQM6;A0A0R4J1Z4;E9Q6Z8;F8VQL7;I1E4X2;P25425;P31362;P70260;Q3U5D1;Q7TSC9	Pou2f1;Pou2f1;Pou2f1;Pou2f1;Pou2f1;Pou2f1;Pou2f1;Pou2f3;Pou2f3;Pou2f3;Pou2f1	POU domain protein;POU domain protein (Fragment);POU domain protein;POU domain protein;POU domain protein;POU domain protein;POU domain, class 2, transcription factor 1;POU domain, class 2, transcription factor 3;Oct11 POU-box protein (119 AA) (Fragment);POU domain protein;POU domain protein	8666.28	8915	9478.02	6118.12	5626.35	4158.56	6564.75	6226.72	7501.3
A0A0A0MQE1	A0A0A0MQE1	Tmem233	Transmembrane protein 233	2666.97	3601.14	926.241	4676.1	8380.42	8238.67	10918.9	10229.3	14280.2
A0A0A0MQE5;A2AHC3	A0A0A0MQE5;A2AHC3	Camsap1	Calmodulin regulated spectrin-associated protein 1;Calmodulin-regulated spectrin-associated protein 1	20342.3	18055.1	16691.7	46340.2	48212.8	54881.6	39701.7	35802	30899.2
A0A0A0MQE8;B2RWX1;B7ZCJ0;B7ZCJ1;Q6DFV3	A0A0A0MQE8;B2RWX1;B7ZCJ0;B7ZCJ1;Q6DFV3	Arhgap21	Rho GTPase activating protein 21;Arhgap21 protein;Rho GTPase activating protein 21;Rho GTPase activating protein 21;Rho GTPase-activating protein 21	6710.42	6498.39	5929.39	6940.63	6689.78	6889.22	4301.71	6212.34	7905.76
A0A0A0MQF6;D2KHZ9;P16858	A0A0A0MQF6;D2KHZ9;P16858	Gapdh	Glyceraldehyde-3-phosphate dehydrogenase	179453	157622	159235	45370.4	41733.4	46820.8	44053.8	45320.8	45357.8
A0A0A0MQJ6;A2A8R7;B2RX14;Q3V3D5;Q9EQN6	A0A0A0MQJ6;A2A8R7;B2RX14;Q3V3D5;Q9EQN6	Tut4	RNA uridylyltransferase (Fragment);RNA uridylyltransferase;Terminal uridylyltransferase 4;RNA uridylyltransferase (Fragment);Developmental control protein (Fragment)	1543.52	2668.65	2961.68	2946.73	2321.73			9509.46	1519.16
A0A0A0MQK3;F6XZS9;Q9WTN3	A0A0A0MQK3;F6XZS9;Q9WTN3	Srebf1	Sterol regulatory element binding transcription factor 1 (Fragment);Sterol regulatory element binding transcription factor 1 (Fragment);Sterol regulatory element-binding protein 1	7524.89	6188.35	10475.3	10500.2	7925.56	7464.14	10166.7	9976.88	9607.21
A0A0A0MQM0;P63242	A0A0A0MQM0;P63242	Eif5a	Eukaryotic translation initiation factor 5A (Fragment);Eukaryotic translation initiation factor 5A-1	3415.36	2184.68	2840.63	5047.01	5177.59	5823.33	5674.69	7389.19	4814.61
A0A0A0MQM2;E0CY47;H3BKE1;H3BKK4;I1E4X4;I1E4X6;Q4KWH5	A0A0A0MQM2;E0CY47;H3BKE1;H3BKK4;I1E4X4;I1E4X6;Q4KWH5	Plch1	Phosphoinositide phospholipase C;Phospholipase C, eta 1 (Fragment);Phosphoinositide phospholipase C (Fragment);Phosphoinositide phospholipase C;Phosphoinositide phospholipase C;Phosphoinositide phospholipase C;1-phosphatidylinositol 4,5-bisphosphate phosphodiesterase eta-1	563.754		335.853		417.467	208.45		463.248	498.445
A0A0A0MQN9;Q80XJ3	A0A0A0MQN9;Q80XJ3	Ttc28	Tetratricopeptide repeat domain 28;Tetratricopeptide repeat protein 28	4688.65	14791.4	2737.39	3862.71	3264	7416.5			9158.38
A0A0A1HAM8;P26645	A0A0A1HAM8;P26645	Marcks	80K protein;Myristoylated alanine-rich C-kinase substrate	57094.7	66278.8	65947.4	87778.8	93534	90473.4	63485.2	59584	58317
A0A0A6YVP8;A0A0A6YWP4;E9Q8H9;E9Q8I0;P06909	A0A0A6YVP8;A0A0A6YWP4;E9Q8H9;E9Q8I0;P06909	Cfh	Complement component factor h;Complement component factor h (Fragment);Complement component factor h;Complement component factor h;Complement factor H	4740.78	692.387	4448.44	4156.34	4188.52	8753.19	1354.9	1705.6	1169.34
A0A0A6YVR2;Q8BVG3;Q9CPV5	A0A0A6YVR2;Q8BVG3;Q9CPV5	Pmf1	Polyamine-modulated factor 1 (Fragment);Polyamine-modulated factor 1;Polyamine-modulated factor 1	6860.41	11025.9	7623.09	26030.8	26245.7	24666.5	19790.8	22648.4	17584.6
A0A0A6YVU1;A2ATT5;Q9JKX6	A0A0A6YVU1;A2ATT5;Q9JKX6	Nudt5	Nudix (nucleoside diphosphate linked moiety X)-type motif 5 (Fragment);Nudix (nucleoside diphosphate linked moiety X)-type motif 5 (Fragment);ADP-sugar pyrophosphatase								1415.91
A0A0A6YVU7	A0A0A6YVU7	Flg	Filaggrin	9277.01	11425.5	8857.79	95991.1	112636	120940	72720.8	88330.7	108563
A0A0A6YVU8;A0A1S6GWG3;Q9JKV1	A0A0A6YVU8;A0A1S6GWG3;Q9JKV1	Adrm1b;Adrm1;Adrm1	Adhesion regulating molecule 1B;Uncharacterized protein;Proteasomal ubiquitin receptor ADRM1	4514.15	5532.06	5441.83	6325.28	5521.4	6140.7	3261.28	2801.11	1282.05
A0A0A6YVV3;A0A0A6YWP9;A0A0A6YXY0;Q9CQ79	A0A0A6YVV3;A0A0A6YWP9;A0A0A6YXY0;Q9CQ79	Txndc9	Thioredoxin domain containing 9;Thioredoxin domain containing 9 (Fragment);Thioredoxin domain containing 9;Thioredoxin domain-containing protein 9
A0A0A6YVY4;Q05AH3;Q1ZZX0;Q9JLF7	A0A0A6YVY4;Q05AH3;Q1ZZX0;Q9JLF7	Tlr5	Toll-like receptor 5;Tlr5 protein;Toll-like receptor 5;Toll-like receptor 5	20401.4	17446.9	18354.9	21112.4	20933.4	21339.8	24850.9	24235.8	27615.7
A0A0A6YVY5;A0A0A6YW74;Q99P69	A0A0A6YVY5;A0A0A6YW74;Q99P69	Nuf2	NUF2, NDC80 kinetochore complex component (Fragment);NUF2, NDC80 kinetochore complex component;Kinetochore protein Nuf2	8703.5		1651.77	7037.3	7002.14	5999.82	6392.29	5164.19	4203.25
A0A0A6YVY7;A0A0A6YW28;P35123;Q5DTK8;Q6NXV6;Q921M8	A0A0A6YVY7;A0A0A6YW28;P35123;Q5DTK8;Q6NXV6;Q921M8	Usp4	ubiquitinyl hydrolase 1;Ubiquitin carboxyl-terminal hydrolase;Ubiquitin carboxyl-terminal hydrolase 4;ubiquitinyl hydrolase 1 (Fragment);Ubiquitin carboxyl-terminal hydrolase (Fragment);Ubiquitin carboxyl-terminal hydrolase	24162.2	14843.2	19877.9	11781.4	10962	12335.5	2927.41	4049.59	4639.58
A0A0A6YW06;A0A0A6YXC8;E9QKQ9;E9QLZ9;J3QNM3;Q03173	A0A0A6YW06;A0A0A6YXC8;E9QKQ9;E9QLZ9;J3QNM3;Q03173	Enah	ENAH actin regulator;ENAH actin regulator;ENAH actin regulator;ENAH actin regulator;ENAH actin regulator;Protein enabled homolog	486.067		1111.27		1003.73				383.534
A0A0A6YW46	A0A0A6YW46	Flg	Filaggrin	3747.95	4878.73	3023.16	16199	17935.4	19287.3	6465.96	8453.61	7004.34
A0A0A6YW53;A0A0A6YWJ2;A0A0A6YWM8;A0A0A6YWR8;B2RUE8;B7ZNR8;B7ZNR9;E9PVG7;P97820;Q6ZQ68	A0A0A6YW53;A0A0A6YWJ2;A0A0A6YWM8;A0A0A6YWR8;B2RUE8;B7ZNR8;B7ZNR9;E9PVG7;P97820;Q6ZQ68	Map4k4;Map4k4;Map4k4;Map4k4;Map4k4;Map4k4;Map4k4;Map4k4;Map4k4;mKIAA0687	Mitogen-activated protein kinase kinase kinase kinase 4;Mitogen-activated protein kinase kinase kinase kinase 4 (Fragment);Mitogen-activated protein kinase kinase kinase kinase 4;Mitogen-activated protein kinase kinase kinase kinase 4;Map4k4 protein;Map4k4 protein;Map4k4 protein;Mitogen-activated protein kinase kinase kinase kinase 4;Mitogen-activated protein kinase kinase kinase kinase 4;MKIAA06…	6839.86	7938.97	5714.74	8275.56	6286.46	9511.41	6717.22	4890.58	4290.3
A0A0A6YW54	A0A0A6YW54	Dcaf6	DDB1 and CUL4 associated factor 6 (Fragment)	3143.5	7424.98	5145.59	1291.61	4251.26	4634.39	4551.81
A0A0A6YW67;A5JUZ1;E9Q4P0;E9Q5F6;E9Q9J0;E9QNP0;P0CG49;P0CG50;P62983;P62984;Q3TH47;Q5M9K3;Q5SX22;Q642L7;Q78XY9;Q8C2K3;Q8R0Z9;Q8VC46;Q922B0;Q922Z8	A0A0A6YW67;A5JUZ1;E9Q4P0;E9Q5F6;E9Q9J0;E9QNP0;P0CG49;P0CG50;P62983;P62984;Q3TH47;Q5M9K3;Q5SX22;Q642L7;Q78XY9;Q8C2K3;Q8R0Z9;Q8VC46;Q922B0;Q922Z8	Gm8797;Ubc;Kxd1;Ubc;Uba52;Kxd1;Ubb;Ubc;Rps27a;Uba52;Ubc;Uba52;Ubb;Rps27a;Ubb;Ubb-ps;Ubc;Ubc;Ubc;Ubc	Predicted pseudogene 8797;Ubiqutin subunit 1 (Fragment);KxDL motif-containing protein 1 (Fragment);Polyubiquitin-C (Fragment);Ubiquitin-60S ribosomal protein L40 (Fragment);KxDL motif-containing protein 1;Polyubiquitin-B;Polyubiquitin-C;Ubiquitin-ribosomal protein eS31 fusion protein;Ubiquitin-ribosomal protein eL40 fusion protein;Ubiquitin-like domain-containing protein;Ubiquitin-60S ribosomal p…	83608.9	92124.6	82977.3	97835.8	83554	77285.8	34089.6	39961	47172.9
A0A0A6YW80;G3X8Y3;Q80UM3;Q8K2S4	A0A0A6YW80;G3X8Y3;Q80UM3;Q8K2S4	Naa15	N(alpha)-acetyltransferase 15, NatA auxiliary subunit;N(alpha)-acetyltransferase 15, NatA auxiliary subunit;N-alpha-acetyltransferase 15, NatA auxiliary subunit;Narg1 protein	1369.09	2379.09	11002.2	2375.19	4970.51	3302.42		2704.09	3017.48
A0A0A6YWG7;E9QNQ4;Q6NXI4;Q8CHG7	A0A0A6YWG7;E9QNQ4;Q6NXI4;Q8CHG7	Rapgef2	Rap guanine nucleotide exchange factor (GEF) 2;Rap guanine nucleotide exchange factor (GEF) 2;Rapgef2 protein (Fragment);Rap guanine nucleotide exchange factor 2	11845.9	11823.6	11142.4	16666.7	17244.5	16877.4	17337.4	16282.9	13922.7
A0A0A6YWH9;A0A0A6YXK4;A0A0A6YY23;Q99KZ6	A0A0A6YWH9;A0A0A6YXK4;A0A0A6YY23;Q99KZ6	Zfp639;Zfp639;Zfp639;Znf639	Zinc finger protein 639 (Fragment);Zinc finger protein 639 (Fragment);Zinc finger protein 639 (Fragment);Zinc finger protein 639	4099.59	2359.43	1323.72	2402.88	2709.3	3227.18	3433.36		2837.24
A0A0A6YWM5;E9QKE4;Q8BMG7	A0A0A6YWM5;E9QKE4;Q8BMG7	Rab3gap2	RAB3 GTPase activating protein subunit 2;RAB3 GTPase activating protein subunit 2;Rab3 GTPase-activating protein non-catalytic subunit	3074.12	872.8	607.709	3662.35	3675.83	10637.4	2873.62	5143.91	6282.49
A0A0A6YWP6;A0A0A6YX18;Q8BVE3	A0A0A6YWP6;A0A0A6YX18;Q8BVE3	Atp6v1h	V-type proton ATPase subunit H	6911.19	10186.6	8276.51	1135.15	1217.52	1773.08		1106.35	725.538
A0A0A6YWT1;A2AQ41;A2AQ42;A2AQ43;A2AQ44;A2AQ45;Q80TY0	A0A0A6YWT1;A2AQ41;A2AQ42;A2AQ43;A2AQ44;A2AQ45;Q80TY0	Fnbp1	Formin binding protein 1 (Fragment);Formin binding protein 1;Formin binding protein 1;Formin binding protein 1;Formin binding protein 1;Formin binding protein 1;Formin-binding protein 1	71018.2	70940.2	80334.6	92658.8	92336.2	92555.8	93181	92152.2	90306.7
A0A0A6YWY0;A6H6A9	A0A0A6YWY0;A6H6A9	Rabgap1l	RAB GTPase activating protein 1-like (Fragment);Rab GTPase-activating protein 1-like	6444.78	2746.22	5550.68	4196.64	2713.84	3769.98	2133.66	2918.76	1646.29
A0A0A6YX02;Q9CQ22	A0A0A6YX02;Q9CQ22	Lamtor1	Ragulator complex protein LAMTOR1	90000.9	75563.5	41960.3	41484.4	53226.1	48476.2	71083.8	79248	89486.8
A0A0A6YX31;Q91XZ2	A0A0A6YX31;Q91XZ2	Pcdhb8	Protocadherin beta 8 (Fragment);Protocadherin beta-8
A0A0A6YX50;P51175;Q3UQA3	A0A0A6YX50;P51175;Q3UQA3	Ppox	Protoporphyrinogen oxidase (Fragment);Protoporphyrinogen oxidase;Protoporphyrinogen oxidase		45680.3	47647.9	12510.9					21352.1
A0A0A6YX73;P12367;Q8K1M3	A0A0A6YX73;P12367;Q8K1M3	Prkar2a	Protein kinase, cAMP dependent regulatory, type II alpha;cAMP-dependent protein kinase type II-alpha regulatory subunit;Protein kinase, cAMP dependent regulatory, type II alpha	7545.88	7344.63	7486.99	7527.19	5792.76	7130.28	2654.88	9364.2	6689.42
A0A0A6YXG1;A0A668KMA1;E9PWX8;E9QPR4;Q811L6	A0A0A6YXG1;A0A668KMA1;E9PWX8;E9QPR4;Q811L6	Mast4	non-specific serine/threonine protein kinase;non-specific serine/threonine protein kinase;non-specific serine/threonine protein kinase;non-specific serine/threonine protein kinase;Microtubule-associated serine/threonine-protein kinase 4	5152.76	4698.71	4624.99	10780.7	11464.2	10185.6	10018.7	7326.54	8878.84
A0A0A6YXG4	A0A0A6YXG4	Flg	Filaggrin	5850.65	5688.65	6563.47	59643.9	57780.6	64423.6	39898.5	41437.3	55497.7
A0A0A6YXG9;A0A0A6YXW7;A0A0B4J1E5;Q543C2;Q8C476;Q99PM9	A0A0A6YXG9;A0A0A6YXW7;A0A0B4J1E5;Q543C2;Q8C476;Q99PM9	Uck2	uridine/cytidine kinase (Fragment);uridine/cytidine kinase (Fragment);uridine/cytidine kinase (Fragment);Uridine-cytidine kinase;Uridine-cytidine kinase;Uridine-cytidine kinase 2	4774.08	3784.24		2531.73	456.112	1988.16		1252.42	504.394
A0A0A6YXH0	A0A0A6YXH0	Flg	Filaggrin			1714.82	5849.61	4765.9	5577.1	6990.1	5748.37
A0A0A6YXH3;A0A1S6GWJ0;A2A8Z1;E9PXZ2;E9Q6C1;F6UHR6;Q5FWX7;Q8R0G3	A0A0A6YXH3;A0A1S6GWJ0;A2A8Z1;E9PXZ2;E9Q6C1;F6UHR6;Q5FWX7;Q8R0G3	Osbpl9	Oxysterol-binding protein;Oxysterol-binding protein;Oxysterol-binding protein-related protein 9;Oxysterol-binding protein;Oxysterol-binding protein;Oxysterol-binding protein;Oxysterol-binding protein;Oxysterol-binding protein	4972.99	1667.7	1358.28	627.227	610.37	697.738	1290.71	1239.36	1507.27
A0A0A6YXH7;A0A0A6YXT8;Q8VHR0	A0A0A6YXH7;A0A0A6YXT8;Q8VHR0	Pcdh18	Protocadherin 18;Protocadherin 18 (Fragment);Protocadherin 18		2261.61	3676.23		9267.55		14508.9	18447.3	25066.3
A0A0A6YXI5	A0A0A6YXI5	Flg	Filaggrin	4408.12	4093.45	4059.84	5347.25	5376.76	3159.32	2028.33	3060.87	3038.25
A0A0A6YXL6;A0A0A6YXX3;A0A1D5RM41;E9Q3Y4	A0A0A6YXL6;A0A0A6YXX3;A0A1D5RM41;E9Q3Y4	Lrba	LPS-responsive beige-like anchor;LPS-responsive beige-like anchor;LPS-responsive beige-like anchor (Fragment);LPS-responsive beige-like anchor	13863.9	13210.1	13449.9	7827.32	9116.02	7680.52	6338.68	5918.3	6856.37
A0A0A6YXR0;D3YX12;D3Z5Y5;Q8BGS7	A0A0A6YXR0;D3YX12;D3Z5Y5;Q8BGS7	Cept1	Choline/ethanolaminephosphotransferase 1 (Fragment);Choline/ethanolaminephosphotransferase 1 (Fragment);Choline/ethanolaminephosphotransferase 1 (Fragment);Choline/ethanolaminephosphotransferase 1							334.538
A0A0A6YXV9;A0A0R4J1R5;E9PVL3;E9QL87;Q504N7;Q8BV49	A0A0A6YXV9;A0A0R4J1R5;E9PVL3;E9QL87;Q504N7;Q8BV49	Ifi209;Ifi214;Ifi214;Ifi214;;Pyhin1	Interferon activated gene 209;Interferon activated gene 214;Interferon activated gene 214;Interferon activated gene 214;Pyrin and HIN domain-containing protein 1-like;Pyrin and HIN domain-containing protein 1	7887.99	7690.62	6480.8	5992.86		4868.17		9597.56	7913.93
A0A0A6YXW1;Q3TEW6	A0A0A6YXW1;Q3TEW6	Mpzl1	Myelin protein zero-like 1;Myelin protein zero-like protein 1	7955.74	6408.19	7543.9	7240.42	6256.15	6174.46	5803.32	4077.62	4808.92
A0A0A6YY53;A0A0E4B366;A0A4U9FGA5;F6TQW2;P01864;Q58E56;Q9D8L4	A0A0A6YY53;A0A0E4B366;A0A4U9FGA5;F6TQW2;P01864;Q58E56;Q9D8L4	Ighg2c;HC;Ighg2c;Ighg2c;;Igh;	Immunoglobulin heavy constant gamma 2C (Fragment);MAb 44B1 heavy chain;IgG2c;Immunoglobulin heavy constant gamma 2C (Fragment);Ig gamma-2A chain C region secreted form;Igh protein;Ig-like domain-containing protein	19743.8	1608.64	6398.54	27100	28381.6	14052.5	18168.2	15619.5	6488.46
A0A0A6YY62	A0A0A6YY62	Flg	Filaggrin	3303.81	3395.91	535.485	28807.2	30623.3	29747.8	29528.1	24041	25307.5
A0A0A6YY64;A2AUP1;A2AUP3;A2AUP4;A2AUP5;A7UAK5;A7UAK8;Q3U3S6;Q7TS91;Q8BVM1;Q9ESY2	A0A0A6YY64;A2AUP1;A2AUP3;A2AUP4;A2AUP5;A7UAK5;A7UAK8;Q3U3S6;Q7TS91;Q8BVM1;Q9ESY2	Pfkfb3	6-phosphofructo-2-kinase/fructose-2,6-biphosphatase 3;6-phosphofructo-2-kinase/fructose-2,6-biphosphatase 3;6-phosphofructo-2-kinase/fructose-2,6-biphosphatase 3;6-phosphofructo-2-kinase/fructose-2,6-biphosphatase 3;6-phosphofructo-2-kinase/fructose-2, 6-biphosphatase 3 splice variant 3;6-phosphofructo-2-kinase/fructose-2, 6-biphosphatase 3 splice variant 2;6-phosphofructo-2-kinase/fructose-2, 6-…	30598.5	93055.7	4294.5	14711	11580.7	12720		5962.12	8426.15
A0A0A6YY67;B2RRE3;H7BX08;Q8C1B1	A0A0A6YY67;B2RRE3;H7BX08;Q8C1B1	Camsap2	Calmodulin regulated spectrin-associated protein family, member 2;Camsap1l1 protein;Calmodulin regulated spectrin-associated protein family, member 2;Calmodulin-regulated spectrin-associated protein 2	1863.85	3083.81	2334.33	7195.5	6507.69	6553.3	3602.05	4730.4	4298.69
A0A0A6YY83;A2RS43;E9Q2S0;O88185;Q3USI1	A0A0A6YY83;A2RS43;E9Q2S0;O88185;Q3USI1	Pcdh7	Protocadherin 7;Protocadherin 7;Protocadherin 7;BH-protocadherin-a;Cadherin domain-containing protein	3584.2	1884.83	3312	6125.48	7032.58	5786.35	5409.23	4898.02	5138.1
A0A0A6YY91;P13595	A0A0A6YY91;P13595	Ncam1	Neural cell adhesion molecule 1 (Fragment);Neural cell adhesion molecule 1	8996.85	9565.36	9770.91	10612.6	11470.3	10750	12375.3	14892	12381.5
A0A0B4J1E2;Q3TM37;Q9CSN1;Q9CV75	A0A0B4J1E2;Q3TM37;Q9CSN1;Q9CV75	Snw1	SNW domain-containing protein 1;SNW domain-containing protein 1 (Fragment);SNW domain-containing protein 1;SNW domain-containing protein 1 (Fragment)	376472	357563	344947	304239	346764	365488	385221	385472	405850
A0A0B4J1E6;A0A0B4J1G1;E9Q415;P08101	A0A0B4J1E6;A0A0B4J1G1;E9Q415;P08101	Fcgr2b;Fcgr2b;Fcgr2b;Fcgr2	Fc receptor, IgG, low affinity IIb;Fc receptor, IgG, low affinity IIb;Fc receptor, IgG, low affinity IIb;Low affinity immunoglobulin gamma Fc region receptor II				1210.7		482.47
A0A0B4J1E7;O35343;Q3UGH8;Q4FJX1	A0A0B4J1E7;O35343;Q3UGH8;Q4FJX1	Kpna4	Karyopherin (importin) alpha 4;Importin subunit alpha-3;IBB domain-containing protein (Fragment);Importin subunit alpha		1
A0A0B4J1F9	A0A0B4J1F9	Tchh	Trichohyalin	1619.21	3784.69	6221.35	46864	49707.8	56300.8	11935.6	10643.1	10286.3
A0A0B4J1G4;Q8K4C4;Q8K599	A0A0B4J1G4;Q8K4C4;Q8K599	Il17d	Interleukin 17D;IL-17D;Interleukin 27A					3876.35				2699.94
A0A0D5ZY64;A0A125T906;A0A125T908;A2NHM3;A2P1G9;Q65ZC0	A0A0D5ZY64;A0A125T906;A0A125T908;A2NHM3;A2P1G9;Q65ZC0	;Igk;Igk;Igkc;Igkc;	IgE L chain kappa;Light chain kappa;Light chain kappa;If kappa light chain (Fragment);Kappa light chain (Fragment);Kappa light chain C_region (Fragment)	880.882	1212.8	1408.26	2477.91	2490.73	3041.65	846.09	872.383	677.432
A0A0D9SEG8;E9QJS7;E9QMJ5;Q4FJS6;Q9DC42;Q9Z0M6	A0A0D9SEG8;E9QJS7;E9QMJ5;Q4FJS6;Q9DC42;Q9Z0M6	Adgre5	Adhesion G protein-coupled receptor E5;Adhesion G protein-coupled receptor E5;Adhesion G protein-coupled receptor E5;Cd97 protein;Adhesion G protein-coupled receptor E5;Adhesion G protein-coupled receptor E5	18910	15516.3	11296.2	36622.7	42817.7	29018.8	17482.1	44295.2	50508.6
A0A0F6AIX5;A0A1W2P6H0;A0A1W2P7C8;A0A1W2P7T7;Q8BVA5	A0A0F6AIX5;A0A1W2P6H0;A0A1W2P7C8;A0A1W2P7T7;Q8BVA5	Ldah	Lipid droplet-associated hydrolase;Lipid droplet associated hydrolase (Fragment);Lipid droplet-associated hydrolase;Lipid droplet-associated hydrolase (Fragment);Lipid droplet-associated hydrolase	4519.6	6089.89	4466.55		1038.88	923.078	1868.3	2548.1	1875.93
A0A0F7IQ06;A2AKI5;F6RWM8;F6W6Q6;P43406;Q3U4C8;Q80Y67	A0A0F7IQ06;A2AKI5;F6RWM8;F6W6Q6;P43406;Q3U4C8;Q80Y67	Itgav	Alpha v integrin;Integrin alpha V;Integrin alpha V (Fragment);Integrin alpha V (Fragment);Integrin alpha-V;Integrin alpha-2 domain-containing protein (Fragment);Itgav protein (Fragment)	4675.93	5631.11	2361.16	3182.89	2237.48	4495.59			3296.05
A0A0G2JDE3;A0A0G2JDF4;A0A0G2JDK6;A0A0G2JFF5;A0A0G2JFV3;A0A0G2JG66;A0A0G2JGC2;A0A0G2JGM8;Q0P6A0;Q8JZZ7	A0A0G2JDE3;A0A0G2JDF4;A0A0G2JDK6;A0A0G2JFF5;A0A0G2JFV3;A0A0G2JG66;A0A0G2JGC2;A0A0G2JGM8;Q0P6A0;Q8JZZ7	Adgrl2	Adhesion G protein-coupled receptor L2;Adhesion G protein-coupled receptor L2;Adhesion G protein-coupled receptor L2;Adhesion G protein-coupled receptor L2;Adhesion G protein-coupled receptor L2;Adhesion G protein-coupled receptor L2;Adhesion G protein-coupled receptor L2 (Fragment);Adhesion G protein-coupled receptor L2;Adhesion G protein-coupled receptor L2;Adhesion G protein-coupled receptor L2	22197.7	18767.4	22840.3	42920.8	45036.4	40486.8	23861.6	27898.1	25302.1
A0A0G2JDI4;H3BJA3;O09172;Q3T9P2;Q4FJZ6	A0A0G2JDI4;H3BJA3;O09172;Q3T9P2;Q4FJZ6	Gclm	Glutamate-cysteine ligase, modifier subunit (Fragment);GCS light chain (Fragment);Glutamate--cysteine ligase regulatory subunit;GCS light chain;GCS light chain	2059.2	2667.46			1733.28		13104.7
A0A0G2JDI9;P55096;Q3U645;Q3UNS0;Q91VT3;Q9DBZ6	A0A0G2JDI9;P55096;Q3U645;Q3UNS0;Q91VT3;Q9DBZ6	Abcd3	ATP-binding cassette, sub-family D (ALD), member 3;ATP-binding cassette sub-family D member 3;ATP-binding cassette sub-family D member 3;ATP-binding cassette sub-family D member 3;ATP-binding cassette, sub-family D (ALD), member 3;ATP-binding cassette sub-family D member 3	681.767			3013.64	3427.28	844.42		23119.2
A0A0G2JDK2;P17439	A0A0G2JDK2;P17439	Gba;Gba1	Glucosylceramidase;Lysosomal acid glucosylceramidase	19078.6	10919.6	2975.99	9367.32	8978.49	7545.52			1692.78
A0A0G2JDL3;P49615;Q543F6	A0A0G2JDL3;P49615;Q543F6	Cdk5	Cyclin-dependent kinase 5;Cyclin-dependent kinase 5;Protein kinase domain-containing protein	80060.4	14457.6	19330	15266.7	13815.1	14140.1	17594.3	12972.8	24689.9
A0A0G2JDM5	A0A0G2JDM5	Synpo2	Synaptopodin 2 (Fragment)	2654.47	2167.32	2771.2		1933.06	3209.83	1809.83	4072.38	1285.15
A0A0G2JDP0;A0A0G2JE46;A0A0G2JFF9;A0A0G2JGG5;B9EJR4;O35387;Q3UXX9;Q8R5I5	A0A0G2JDP0;A0A0G2JE46;A0A0G2JFF9;A0A0G2JGG5;B9EJR4;O35387;Q3UXX9;Q8R5I5	Hax1	HCLS1-associated protein X-1;HCLS1-associated protein X-1;HCLS1-associated protein X-1;HCLS1 associated X-1 (Fragment);HCLS1-associated protein X-1;HCLS1-associated protein X-1;HCLS1-associated protein X-1;HCLS1-associated protein X-1	16509.1	16675.6	14861.1	10864.5	16363.9	15872.3	7862.54	6678.67	7460.03
A0A0G2JDV6;A0A0H2UH17;Q80X50;Q812D4;Q812D5;Q8BJ53	A0A0G2JDV6;A0A0H2UH17;Q80X50;Q812D4;Q812D5;Q8BJ53	Ubap2l;Ubap2l;Ubap2l;Ubap2l;lig-2a;Ubap2l	Ubiquitin-associated protein 2-like;Ubiquitin-associated protein 2-like;Ubiquitin-associated protein 2-like;Lingerer protein-2b;Lingerer protein-2a;UBA domain-containing protein	10412.6	9308.99	9205.73	24962.2	24376.2	24178.5	24070.5	23911	21930.6
A0A0G2JDV8;Q9DAW9	A0A0G2JDV8;Q9DAW9	Cnn3	Calponin;Calponin-3	531226	5199.05	2621.72		2.0212e+06	980622	737450	1.06408e+06	348901
A0A0G2JDW1	A0A0G2JDW1	Agap3	ArfGAP with GTPase domain, ankyrin repeat and PH domain 3	7400.95	6176.57	5206.83	6252.88	6994.92	6750.36	3180.06	6492.42	6903.79
A0A0G2JDW2;P09542	A0A0G2JDW2;P09542	Myl3	Myosin, light polypeptide 3 (Fragment);Myosin light chain 3	479.991	694.742	619.545		79.0939	186.807
A0A0G2JDW7;A0A0G2JG29;Q6ZWU9	A0A0G2JDW7;A0A0G2JG29;Q6ZWU9	Rps27	40S ribosomal protein S27 (Fragment);40S ribosomal protein S27;Small ribosomal subunit protein eS27	23052.3	21876.4	21282.5	7668.37	8511.75	8359.07	13095.9	17165.8	14481
A0A0G2JDW8;O08970;Q3TAP8;Q3V1F5	A0A0G2JDW8;O08970;Q3TAP8;Q3V1F5	Tuft1	Tuftelin 1;Tuftelin;Tuftelin;Tuftelin		889.484	948.54				1957.17
A0A0G2JDZ5;Q8C3Q6;Q9D478	A0A0G2JDZ5;Q8C3Q6;Q9D478	Odf2l	Outer dense fiber of sperm tails 2-like (Fragment);Uncharacterized protein;Protein BCAP		12647.6
A0A0G2JE25;A0A0G2JGP4;P08556;Q3TMF4;Q3UCX0;Q4FJP3;Q61411;Q9D091;Q9R0B8	A0A0G2JE25;A0A0G2JGP4;P08556;Q3TMF4;Q3UCX0;Q4FJP3;Q61411;Q9D091;Q9R0B8	Nras;Nras;Nras;Nras;Nras;Nras;Hras;Nras;	Neuroblastoma ras oncogene (Fragment);Neuroblastoma ras oncogene (Fragment);GTPase NRas;GTPase NRas;GTPase NRas;Nras protein;GTPase HRas;Neuroblastoma ras oncogene;H-ras (Fragment)	16180.5	2454.17	16485.4	5270.76	6010.7	5079.14	4751.78	3614.09	6415.36
A0A0G2JE32;A0A0G2JGL0;P61079;Q3U5V6;Q4QQL2;Q9D1S1;Q9D7F5	A0A0G2JE32;A0A0G2JGL0;P61079;Q3U5V6;Q4QQL2;Q9D1S1;Q9D7F5	Ube2d3	Ubiquitin-conjugating enzyme E2D 3 (Fragment);Ubiquitin-conjugating enzyme E2D 3;Ubiquitin-conjugating enzyme E2 D3;UBC core domain-containing protein;Ubiquitin-conjugating enzyme E2D 3 (UBC4/5 homolog, yeast);UBC core domain-containing protein;UBC core domain-containing protein	16414.8	117372	2909.68	7338.85	6046.03	3595.01	2999.09	8434.47	7456
A0A0G2JE33;A0A0G2JE98;Q9D3X5	A0A0G2JE33;A0A0G2JE98;Q9D3X5	5730480H06Rik;5730480H06Rik;Pacrgl	RIKEN cDNA 5730480H06 gene;RIKEN cDNA 5730480H06 gene (Fragment);PACRG-like protein	1507.88	1955.14	911.129	652.603	7934.46	5505.64	3798.48	5177.46	7093.48
A0A0G2JE56;A0A0G2JEF7;A0A0G2JEM1;F7AFH2;Q6P8W7;Q6P9P9;Q9CZP3	A0A0G2JE56;A0A0G2JEF7;A0A0G2JEM1;F7AFH2;Q6P8W7;Q6P9P9;Q9CZP3	Zfp655	Zinc finger protein 655;Zinc finger protein 655;Zinc finger protein 655;Zinc finger protein 655 (Fragment);Zfp655 protein;Zinc finger protein 655;Zinc finger protein 655	12887.7	12109.6	16236.7	21851.3	20461.7	24412.5	18100.6	16935.1	12679.5
A0A0G2JE69;Q8BG20;Q9CWQ0;V9GXP1	A0A0G2JE69;Q8BG20;Q9CWQ0;V9GXP1	Dph5	diphthine methyl ester synthase (Fragment);diphthine methyl ester synthase;Diphthine methyl ester synthase;diphthine methyl ester synthase		461.099	1867.71		2235.02
A0A0G2JE71;A0A0G2JGG7;B2RUA8;Q5U463;Q6S5J6	A0A0G2JE71;A0A0G2JGG7;B2RUA8;Q5U463;Q6S5J6	Krit1	KRIT1, ankyrin repeat containing (Fragment);KRIT1, ankyrin repeat containing;KRIT1, ankyrin repeat containing;Krit1 protein (Fragment);Krev interaction trapped protein 1	5970.04	5015.78	5175.82		2807.44	4392.82	5458.87		4834.64
A0A0G2JE93;A0A1Y7VJA7;Q3U852;Q9DCI3	A0A0G2JE93;A0A1Y7VJA7;Q3U852;Q9DCI3	Stard3nl	STARD3 N-terminal like;STARD3 N-terminal like;MENTAL domain-containing protein;STARD3 N-terminal-like protein	18816.9	11245.6	18843.9	9188.24	7354.22	8357.18	6512.99	9056.28	16244.1
A0A0G2JEA0;B2RX15;Q6ZPS6	A0A0G2JEA0;B2RX15;Q6ZPS6	Ankib1	RBR-type E3 ubiquitin transferase (Fragment);RBR-type E3 ubiquitin transferase;Ankyrin repeat and IBR domain-containing protein 1	84126.3	98964.8	78217.7	49497.7	45208.2	37176.7	45778.9	57280.7	60401.2
A0A0G2JEG3;Q8VE96	A0A0G2JEG3;Q8VE96	Slc35f6	Solute carrier family 35, member F6;Solute carrier family 35 member F6
A0A0G2JEK2;P63254;Q6P3B4;Q8C2N7	A0A0G2JEK2;P63254;Q6P3B4;Q8C2N7	Crip1	Cysteine-rich protein 1 (intestinal);Cysteine-rich protein 1;Cysteine-rich protein 1 (Intestinal);LIM zinc-binding domain-containing protein	10149.5	10935.9	7855.28	1123.89	2400.18	3154.88	2894.06	2486.38	1816.6
A0A0G2JEK7;Q9CQJ0	A0A0G2JEK7;Q9CQJ0	Them5	Thioesterase superfamily member 5;Acyl-coenzyme A thioesterase THEM5	5119.73	4132.05	5470.03	3846	2017.17
A0A0G2JES3;A0A140T8T4;P51410;Q5EBQ6;Q5M9J5	A0A0G2JES3;A0A140T8T4;P51410;Q5EBQ6;Q5M9J5	Rpl9;Rpl9-ps6;Rpl9;Rpl9;Rpl9	60S ribosomal protein L9 (Fragment);60S ribosomal protein L9;Large ribosomal subunit protein uL6;60S ribosomal protein L9;60S ribosomal protein L9	27011.9	19940.3	12629.5	8602.26		6399.92	2362.62	1756.19	1042.49
A0A0G2JET2;Q8C078	A0A0G2JET2;Q8C078	Camkk2	Calcium/calmodulin-dependent protein kinase kinase 2, beta (Fragment);Calcium/calmodulin-dependent protein kinase kinase 2	37679.1	37032.5	36129	26408.5	23379.1	19149.8	25800.8	29793	26487.4
A0A0G2JEV0;A0A0G2JEV2;A0A0G2JGI2;D6RCV6;D6RJ71;O35216	A0A0G2JEV0;A0A0G2JEV2;A0A0G2JGI2;D6RCV6;D6RJ71;O35216	Cenpa	Centromere protein A;Centromere protein A;Centromere protein A (Fragment);Centromere protein A;Centromere protein A;Histone H3-like centromeric protein A	13486.8	11271	9712.27	2612.44	3178.62	1756.17	3496.33	4983.29	4588.71
A0A0G2JEW9;Q544F4;Q9ESG6	A0A0G2JEW9;Q544F4;Q9ESG6	P2ry14	Purinergic receptor P2Y, G-protein coupled, 14;G-protein coupled receptors family 1 profile domain-containing protein;P2Y purinoceptor 14	4186.34	3588.75	4096.63	3737.96	3623.92	4284.55	2695.35	2750.3	5614.88
A0A0G2JEX1;A0A0G2JFD8;G4W8R2;G4W8R4;Q7TPW1	A0A0G2JEX1;A0A0G2JFD8;G4W8R2;G4W8R4;Q7TPW1	Nexn	Nexilin;Nexilin;Nexilin alpha;Nexilin gamma;Nexilin	131358	130979	136140	73542.5	71050.4	73159.2	94154.5	104595	97038.2
A0A0G2JEY9;A0A1D5RLX6;E9PUP1;Q8BKW6	A0A0G2JEY9;A0A1D5RLX6;E9PUP1;Q8BKW6	Syde2	Synapse defective 1, Rho GTPase, homolog 2 (C. elegans);Synapse defective 1, Rho GTPase, homolog 2 (C. elegans);Synapse defective 1, Rho GTPase, homolog 2 (C. elegans);Rho-GAP domain-containing protein (Fragment)	1126.96	1436.49	920.292	1983.27	2992.7	1581.57	924.802	1676.87	1770.94
A0A0G2JF68;Q99MP8	A0A0G2JF68;Q99MP8	Brap	BRCA1 associated protein (Fragment);BRCA1-associated protein	27744	23181.4	26269.7	22710.6	21030.7	21139.6	19339.9	18420.7	19457.5
A0A0G2JFC0;A0A0G2JGV2;Q9QZK2	A0A0G2JFC0;A0A0G2JGV2;Q9QZK2	Bcar3	Breast cancer anti-estrogen resistance 3 (Fragment);Breast cancer anti-estrogen resistance 3 (Fragment);Breast cancer anti-estrogen resistance protein 3 homolog	7417.27	3401.15	6349.31	18436.1	20043.3	14289.2	8283.39	10225.1	10786.2
A0A0G2JFE7;Q8C3Y4	A0A0G2JFE7;Q8C3Y4	Kntc1	Kinetochore associated 1 (Fragment);Kinetochore-associated protein 1	1692.56	1269.21	936.635	2205.07	1909.89	1901.46
A0A0G2JFH2	A0A0G2JFH2	Map4	Microtubule-associated protein (Fragment)	97886.5	102144	94491.7	60844.5	54044.5	64253.3	73984.6	66035.9	67718.4
A0A0G2JFI7;A0A0H2UH28;A0A0H2UKB6	A0A0G2JFI7;A0A0H2UH28;A0A0H2UKB6	Mef2c	Myocyte enhancer factor 2C (Fragment);Myocyte enhancer factor 2C;Myocyte enhancer factor 2C	10628.3	2240.72	7940.9	3438.67	1962.03	5676.15	12132	13414	4438.68
A0A0G2JFJ6;Q7TPD0	A0A0G2JFJ6;Q7TPD0	Ints3	Integrator complex subunit 3	6167.92	14280.7	6935.45	13980.4	15090	13868.9	12226.3	18551.1	15630.6
A0A0G2JFM9;A0A5F8MPQ8;E9PUI5;E9PUK3;Q8K012	A0A0G2JFM9;A0A5F8MPQ8;E9PUI5;E9PUK3;Q8K012	Fnbp1l	Formin binding protein 1-like (Fragment);Formin-binding protein 1-like;Formin-binding protein 1-like;Formin-binding protein 1-like;Formin-binding protein 1-like	64839.2	64650.8	59898.7	38539.3	36684.5	29823.5	20476.9	11648.7	16950.6
A0A0G2JFP9;P29533;Q3TR98;Q3UPN1;Q544V4;Q8K0X1;Q91X98	A0A0G2JFP9;P29533;Q3TR98;Q3UPN1;Q544V4;Q8K0X1;Q91X98	Vcam1;Vcam1;Vcam1;Vcam1;;Vcam1;Vcam1	Vascular cell adhesion molecule 1 (Fragment);Vascular cell adhesion protein 1;Ig-like domain-containing protein;Vascular cell adhesion molecule 1;Ig-like domain-containing protein;Vascular cell adhesion molecule 1;Vascular cell adhesion molecule 1	3819.52	3446.66	3761.13		1616.96	2645.1		3426.77	4732.84
A0A0G2JFQ4;B2RXS1;B7ZWL5;E9Q9L6;Q6ZQA0	A0A0G2JFQ4;B2RXS1;B7ZWL5;E9Q9L6;Q6ZQA0	Nbeal2	Neurobeachin-like 2;Nbeal2 protein;Nbeal2 protein;Neurobeachin-like 2;Neurobeachin-like protein 2	6351.56	10342.2	11895.2	6398.81	4203.19	4090.15	28239.9	12655.7	13510.2
A0A0G2JFT8	A0A0G2JFT8	Rufy3	RUN and FYVE domain containing 3	15512.7	19763.3	23757.4	21302.3	17065.4	10367.3	12016	12403.5	15699.8
A0A0G2JFV9;Q9JHI7	A0A0G2JFV9;Q9JHI7	Exosc9	Exosome component 9 (Fragment);Exosome complex component RRP45				496.795	1128.67	1118.9		753.584	572.906
A0A0G2JFW6;Q6NXI6	A0A0G2JFW6;Q6NXI6	Rprd2	Regulation of nuclear pre-mRNA domain containing 2 (Fragment);Regulation of nuclear pre-mRNA domain-containing protein 2	30294.2	34030.8	36916.2	44068	48599.3	52384.5	33824.7	33365.4	38236.3
A0A0G2JFX7;Q9CWZ3	A0A0G2JFX7;Q9CWZ3	Rbm8a	RNA-binding protein 8A	12429.9	8782.71	16662.9	13125.3	9562.97	10048.2	13885.5	8595.16	11178.5
A0A0G2JG10;O35286;Q3TFE5;Q3UDX4;Q3UKJ6;Q497W9	A0A0G2JG10;O35286;Q3TFE5;Q3UDX4;Q3UKJ6;Q497W9	Dhx15	RNA helicase;ATP-dependent RNA helicase DHX15;RNA helicase;RNA helicase (Fragment);RNA helicase;RNA helicase	9489.72	12229.1	11316.1	7858.69	7242.14	7699.11	7151.08	7221.07	4476.05
A0A0G2JG49;Q3UDK1	A0A0G2JG49;Q3UDK1	Trafd1	TRAF type zinc finger domain containing 1 (Fragment);TRAF-type zinc finger domain-containing protein 1	1377.21	680.601	1949.27	3025.2	3605.86	1094.85	2837.27	2331.83
A0A0G2JG52	A0A0G2JG52	Crybg1	Crystallin beta-gamma domain containing 1	15817.2	15090	15216.5	11308.2	12852.6	11755.9	15302.4	15547.3	15880.9
A0A0G2JG85;E9PYF7;Q99LV9	A0A0G2JG85;E9PYF7;Q99LV9	Ap1ar	Adaptor-related protein complex 1 associated regulatory protein;AP1AR;BC002199 protein	5504.45	5488.31		5341.14		8355.84	6482.98	6265.64	8498.24
A0A0G2JG95;A1A4A7;B7ZNW0;Q8BX10	A0A0G2JG95;A1A4A7;B7ZNW0;Q8BX10	Pgam5	Phosphoglycerate mutase family member 5 (Fragment);Pgam5 protein (Fragment);Pgam5 protein;Serine/threonine-protein phosphatase PGAM5, mitochondrial	1858.32	1881.08	174.204				3882.1
A0A0G2JGA9;Q62209	A0A0G2JGA9;Q62209	Sycp1	Synaptonemal complex protein 1 (Fragment);Synaptonemal complex protein 1
A0A0G2JGD2;P07091;Q545V2	A0A0G2JGD2;P07091;Q545V2	S100a4	S100 calcium binding protein A4 (Fragment);Protein S100-A4;Protein S100	6900.46	6416.6	6552.31	3301.24	4089.87	3575.24	5499.48	6999.63	3431.96
A0A0G2JGL8;Q80TP6;Q99PU8	A0A0G2JGL8;Q80TP6;Q99PU8	Dhx30;mKIAA0890;Dhx30	RNA helicase;RNA helicase (Fragment);ATP-dependent RNA helicase DHX30	14213.9	10489.2	12264.7	9139.24	10788.6	9372.81	15304.7	11034.7	12051.9
A0A0G2JGQ6;A3KN70;Q8CHG1;Q9JLM7;Q9JLM8	A0A0G2JGQ6;A3KN70;Q8CHG1;Q9JLM7;Q9JLM8	Dclk1	Doublecortin-like kinase 1;Dclk1 protein;MKIAA0369 protein (Fragment);Doublecortin-like protein;Serine/threonine-protein kinase DCLK1		1488.65	1231.23		3332.78			2018.93
A0A0G2JGS4;E9Q1T1	A0A0G2JGS4;E9Q1T1	Camk2d	calcium/calmodulin-dependent protein kinase	56124.3	56345.9	46423.4	31101.7	24198	28066.3	21538	19953.5	23847.7
A0A0G2JGT5;P63073;Q3TK95;Q8C470	A0A0G2JGT5;P63073;Q3TK95;Q8C470	Eif4e	Eukaryotic translation initiation factor 4E (Fragment);Eukaryotic translation initiation factor 4E;Eukaryotic translation initiation factor 4E;Eukaryotic translation initiation factor 4E	13637	11898.5	14979.1	5996.8	4975.01	7164.38	1946.11	4793.19	4200.8
A0A0G2JGW9;Q0P6B2;Q3TUE1	A0A0G2JGW9;Q0P6B2;Q3TUE1	Fubp1	Far upstream element (FUSE) binding protein 1	3318.09	1794.05	1705.5	3282.88	2410.98	2014.42	614.244	1410.98	420.878
A0A0G2JGX3;Q3TJD4;Q3UF04;Q5I0W0;Q9CQQ7	A0A0G2JGX3;Q3TJD4;Q3UF04;Q5I0W0;Q9CQQ7	Atp5pb	ATP synthase subunit b (Fragment);ATP synthase subunit b;ATP synthase subunit b;ATP synthase subunit b;ATP synthase F(0) complex subunit B1, mitochondrial	4936.92	3517.38	4534.47	1365.4	1628	2364	3433.99	2856.91	1089.51
A0A0G2JGX4;Q6PIC6;Q8VCE0	A0A0G2JGX4;Q6PIC6;Q8VCE0	Atp1a3	Sodium/potassium-transporting ATPase subunit alpha;Sodium/potassium-transporting ATPase subunit alpha-3;Sodium/potassium-transporting ATPase subunit alpha	1619.44	2486.97	1994.59	2115.26	1411.95	1899.46	1271.29	1767.86
A0A0G2JH17;K3W4P2;Q6P4S8	A0A0G2JH17;K3W4P2;Q6P4S8	Ints1	Integrator complex subunit 1	64530.6	57989	44986.9	48522.5	54108.2	49128.1	37409	35007.5	35780.6
A0A0H2UH19;E9Q5A3;H7CHP8;Q5DW34;Z4YJZ7	A0A0H2UH19;E9Q5A3;H7CHP8;Q5DW34;Z4YJZ7	Ehmt1	Euchromatic histone methyltransferase 1;Euchromatic histone methyltransferase 1;Euchromatic histone methyltransferase 1;Histone-lysine N-methyltransferase EHMT1;Euchromatic histone methyltransferase 1			358.225	3292.37	4076.81	3084.51	2431.27	2447.68	2728.44
A0A0H2UH20;B2RRT9;D3Z4U0;E9PUD0;Q9R020	A0A0H2UH20;B2RRT9;D3Z4U0;E9PUD0;Q9R020	Zranb2	Zinc finger, RAN-binding domain containing 2 (Fragment);Zinc finger Ran-binding domain-containing protein 2;Zinc finger Ran-binding domain-containing protein 2;Zinc finger Ran-binding domain-containing protein 2;Zinc finger Ran-binding domain-containing protein 2	185342	187382	176398	76836.1	79787.5	81886.9	106023	102534	100404
A0A0J9YTQ5;A0A0J9YUB8;E9QNJ9;F6TK14;Q3TQL1;Q3UPE1;Q61563;Q61851;Q7TSI8;Q99052	A0A0J9YTQ5;A0A0J9YUB8;E9QNJ9;F6TK14;Q3TQL1;Q3UPE1;Q61563;Q61851;Q7TSI8;Q99052	Fgfr3	Fibroblast growth factor receptor 3 (Fragment);Fibroblast growth factor receptor 3 (Fragment);Fibroblast growth factor receptor;Fibroblast growth factor receptor;receptor protein-tyrosine kinase (Fragment);Fibroblast growth factor receptor;Fibroblast growth factor receptor;Fibroblast growth factor receptor 3;Fibroblast growth factor receptor;Fibroblast growth factor receptor	382.257	576.494	1736.02	775.7	294.677
A0A0J9YTQ7;D3Z780;Q61749	A0A0J9YTQ7;D3Z780;Q61749	Eif2b4	Eukaryotic translation initiation factor 2B, subunit 4 delta (Fragment);Eukaryotic translation initiation factor 2B, subunit 4 delta;Translation initiation factor eIF-2B subunit delta	7700.47			7275.73	10727	10421.7	4778.89	4322.25	6054.93
A0A0J9YTR7;Q3TVN6;Q6P8R3;Q9Z126	A0A0J9YTR7;Q3TVN6;Q6P8R3;Q9Z126	Pf4	Platelet factor 4;C-X-C motif chemokine;C-X-C motif chemokine;Platelet factor 4	56327.2	23905.7	12529.6	5906.3	6285.34	4801.87		1378.72	1520.64
A0A0J9YTR9;A0A0J9YTW1;A0A0J9YU37;A0A0J9YUG4;A0A0J9YUK1;A0A0J9YUP9;A0A0J9YVG2;Q8CE98;Q91YV0	A0A0J9YTR9;A0A0J9YTW1;A0A0J9YU37;A0A0J9YUG4;A0A0J9YUK1;A0A0J9YUP9;A0A0J9YVG2;Q8CE98;Q91YV0	Tcf4	Transcription factor 4;Transcription factor 4;Transcription factor 4;Transcription factor 4;Transcription factor 4;Transcription factor 4;Transcription factor 4;BHLH domain-containing protein;Tcf4 protein	737.205		149.29		159.458	119.281			262.335
A0A0J9YTU3;A0A0J9YUR2;Q5SXY1	A0A0J9YTU3;A0A0J9YUR2;Q5SXY1	Specc1	Sperm antigen with calponin homology and coiled-coil domains 1;Sperm antigen with calponin homology and coiled-coil domains 1;Cytospin-B	3775.54	3039.96	1091.23	3050.41	4040	1983.49	1460.43	2347.15	2298.66
A0A0J9YTV1;A0A0J9YVJ6;A0A140LIZ1;E9Q9A5;G5E8N7;Q3T9F5;Q9JLV6	A0A0J9YTV1;A0A0J9YVJ6;A0A140LIZ1;E9Q9A5;G5E8N7;Q3T9F5;Q9JLV6	Pnkp	Polynucleotide kinase 3'- phosphatase;Polynucleotide kinase 3'- phosphatase;Polynucleotide kinase 3'- phosphatase (Fragment);Polynucleotide kinase 3'- phosphatase;Polynucleotide kinase 3'- phosphatase;PNK FHA domain-containing protein;Bifunctional polynucleotide phosphatase/kinase	6713.1	4201.46	4896.08				4545.52
A0A0J9YTW3;A0A0J9YU62;A0A0J9YUM4;A0A0J9YUR5;O88712	A0A0J9YTW3;A0A0J9YU62;A0A0J9YUM4;A0A0J9YUR5;O88712	Ctbp1	C-terminal binding protein 1 (Fragment);C-terminal binding protein 1;C-terminal binding protein 1;C-terminal binding protein 1 (Fragment);C-terminal-binding protein 1	2684.21	2838.13	3556.39			769.242		3725.08	610.31
A0A0J9YTX9;A0A0J9YU67;F8WJA5;Q61474	A0A0J9YTX9;A0A0J9YU67;F8WJA5;Q61474	Msi1	Musashi RNA-binding protein 1 (Fragment);Musashi RNA-binding protein 1 (Fragment);Musashi RNA-binding protein 1 (Fragment);RNA-binding protein Musashi homolog 1				9401.8	4343.52	4645.59	5931.1	7779.46	6647.8
A0A0J9YTY0;A0A0J9YUL3;Q8C1B7	A0A0J9YTY0;A0A0J9YUL3;Q8C1B7	Septin11	Septin;Septin;Septin-11	17374.9	17831.4	17498.1	7955.54	13090.9	10741.6	9240.61	10475.3	7774.33
A0A0J9YU02;A0A1S6GWG5;Q3UMV5;Q5XJX8;Q9D7N3;Q9ER89	A0A0J9YU02;A0A1S6GWG5;Q3UMV5;Q5XJX8;Q9D7N3;Q9ER89	Mrps9	Mitochondrial ribosomal protein S9 (Fragment);28S ribosomal protein S9, mitochondrial;28S ribosomal protein S9, mitochondrial;Mrps9 protein (Fragment);Small ribosomal subunit protein uS9m;Muscle protein 637		894.579	1852.57		330.694	450.942	1582.99
A0A0J9YU61;O08785;Q6ZQD6;Q8K1L9	A0A0J9YU61;O08785;Q6ZQD6;Q8K1L9	Clock	Circadian locomotor output cycles kaput;Circadian locomoter output cycles protein kaput;MKIAA0334 protein (Fragment);CLOCK (Fragment)	18154.1	15084	17648	12597.6	11562.6	15238	23428	6275.12	5771.83
A0A0J9YU82;A0A0R4J171;A0A2X0SFI9;B9EKA3;D5M8I5;E9PXD2;E9QKB1;F8WIY7;Q3UWP1;Q8K031;Q923Q2;Q9R0Z9	A0A0J9YU82;A0A0R4J171;A0A2X0SFI9;B9EKA3;D5M8I5;E9PXD2;E9QKB1;F8WIY7;Q3UWP1;Q8K031;Q923Q2;Q9R0Z9	Stard13;Dlc1;STARD13;Dlc1;Dlc1;Dlc1;Dlc1;Stard13;Stard13;Stard8;Stard13;Dlc1	StAR-related lipid transfer (START) domain containing 13;Deleted in liver cancer 1;STARD13 (Fragment);Deleted in liver cancer 1;Deleted in liver cancer 1;Deleted in liver cancer 1;Deleted in liver cancer 1;StAR-related lipid transfer (START) domain containing 13;StAR-related lipid transfer protein 13 (Fragment);StAR-related lipid transfer protein 8;StAR-related lipid transfer protein 13;Rho GTPas…	4136.74	3633.75	2945.27	3415.75	2371.31	1887.39	3562.27	3494.29	2404.24
A0A0J9YUA8;E9QLJ3;Q6GQS5;Q6JPI3	A0A0J9YUA8;E9QLJ3;Q6GQS5;Q6JPI3	Med13l	Mediator of RNA polymerase II transcription subunit 13;Mediator of RNA polymerase II transcription subunit 13;Mediator of RNA polymerase II transcription subunit 13 (Fragment);Mediator of RNA polymerase II transcription subunit 13-like	7302.79	8244.23	8709.46	3102.79	2394.13	1837.95	735.701	975.856	1207.21
A0A0J9YUB2;Q3UUG6	A0A0J9YUB2;Q3UUG6	Tbc1d24	TBC1 domain family, member 24;TBC1 domain family member 24	1065.25	945.953		1307.9		828.99
A0A0J9YUB6;A0A0J9YUK7;Q9CRD0	A0A0J9YUB6;A0A0J9YUK7;Q9CRD0	Ociad1	OCIA domain containing 1 (Fragment);OCIA domain containing 1;OCIA domain-containing protein 1					36284.9			8971.4	10341.7
A0A0J9YUC9;Q3TPI1;Q8BUH8;Q9CQN9	A0A0J9YUC9;Q3TPI1;Q8BUH8;Q9CQN9	Senp7	SUMO1/sentrin specific peptidase 7;Sentrin-specific protease 7;Sentrin-specific protease 7;SUMO1/sentrin specific peptidase 7	80513.4	41700.1	69523.1	24515.9	24200	28611.7	26678.1	30070.5	30361.1
A0A0J9YUD5;B9EJ54;Q6P9L5;Q6P9Y6;Q6PDG0;Q6ZQG1	A0A0J9YUD5;B9EJ54;Q6P9L5;Q6P9Y6;Q6PDG0;Q6ZQG1	Nup205	Nucleoporin 205;Nucleoporin 205;Nup205 protein (Fragment);Nup205 protein (Fragment);Nup205 protein (Fragment);MKIAA0225 protein (Fragment)	14437.1	15030.6	15434.5	6229.07	2993.68	4892.86	3844.33	2206.2	3147.54
A0A0J9YUE9;A0A0J9YUN4;P39053	A0A0J9YUE9;A0A0J9YUN4;P39053	Dnm1	dynamin GTPase;dynamin GTPase;Dynamin-1	7861.44	8315.89	7574.17	12891.8	12386.4	12907.8	8308.75	9933.58	11469
A0A0J9YUF2;A0A0J9YUK0;A0A140LHS2;A0A140LI50;O08759;Q5DTH1	A0A0J9YUF2;A0A0J9YUK0;A0A140LHS2;A0A140LI50;O08759;Q5DTH1	Ube3a	Ubiquitin protein ligase E3A (Fragment);Ubiquitin protein ligase E3A (Fragment);Ubiquitin protein ligase E3A (Fragment);Ubiquitin protein ligase E3A (Fragment);Ubiquitin-protein ligase E3A;HECT-type E3 ubiquitin transferase (Fragment)		2128.1	748.104	1320.67	2811.4			2014.45	710.605
A0A0J9YUH9;P39428;Q3UM74;Q4VA12;Q8C245	A0A0J9YUH9;P39428;Q3UM74;Q4VA12;Q8C245	Traf1	TNF receptor-associated factor 1;TNF receptor-associated factor 1;TNF receptor-associated factor;TNF receptor-associated factor;TNF receptor-associated factor BIRC3 binding domain-containing protein	27666.3	20861.3	16003.5		15302.3	11567.3	13516.4	17844.9	14664.5
A0A0J9YUI1;D3Z4U3;F8WIC2;P61087;Q3TL77;Q6ZWQ6	A0A0J9YUI1;D3Z4U3;F8WIC2;P61087;Q3TL77;Q6ZWQ6	Ube2k	Ubiquitin-conjugating enzyme E2K;E2 ubiquitin-conjugating enzyme;Ubiquitin-conjugating enzyme E2K;Ubiquitin-conjugating enzyme E2 K;UBC core domain-containing protein;E2 ubiquitin-conjugating enzyme	1505.64		3645.07	639.286			2118.21
A0A0J9YUP5;F8VQG7;Q69ZK1;Q8BX85	A0A0J9YUP5;F8VQG7;Q69ZK1;Q8BX85	N4bp2	NEDD4 binding protein 2 (Fragment);NEDD4 binding protein 2;MKIAA1413 protein (Fragment);NEDD4-binding protein 2-like 2 (Fragment)	1364.38	1955.15	1862.2	7746.51	11551.5	10787.8	15391.6	12535.5	13562
A0A0J9YUS5;E9PVC5;E9PVC6;E9Q9E1;Q6NZJ6	A0A0J9YUS5;E9PVC5;E9PVC6;E9Q9E1;Q6NZJ6	Eif4g1	Eukaryotic translation initiation factor 4, gamma 1;Eukaryotic translation initiation factor 4, gamma 1;Eukaryotic translation initiation factor 4, gamma 1;Eukaryotic translation initiation factor 4, gamma 1;Eukaryotic translation initiation factor 4 gamma 1	888795	870913	920503	794665	902199	851236	945779	818065	929763
A0A0J9YUZ4	A0A0J9YUZ4	Hmgb1	High mobility group box 1 (Fragment)	3699.41	4377.33	7308	10026.3	15934.2	11359.4	22760.8	3916.82	3004.39
A0A0J9YV01;A0A0M3HEP2;H9H9S3;Q3URW5;Q80TX6;Q9R0G7	A0A0J9YV01;A0A0M3HEP2;H9H9S3;Q3URW5;Q80TX6;Q9R0G7	Zeb2	Zinc finger E-box binding homeobox 2;Zinc finger E-box binding homeobox 2;Zinc finger E-box binding homeobox 2;C2H2-type domain-containing protein;MKIAA0569 protein (Fragment);Zinc finger E-box-binding homeobox 2	11706.2	9693.24	9459.11	5791.75	5854.34	7749.88	4707.22	5232.61	5094.89
A0A0J9YV20;A0A0R4J0B7;Q80UZ2	A0A0J9YV20;A0A0R4J0B7;Q80UZ2	Sdad1	Protein SDA1;Protein SDA1;Protein SDA1 homolog	34519.8	32671.8	32199	16865.7	16375.1	15064.7	8305.25	8615.87	8507.58
A0A0J9YV30	A0A0J9YV30	Pxn	Paxillin	15277.6	8956.86	7338.97	7800.33	8020.24	8952.78	9145.73	8955.45	10033.9
A0A0J9YV34;A0A0M3HEP7;A1L332;E9Q4J5;F6Q8P7;P70704;Q3U9N5;Q5DTG0	A0A0J9YV34;A0A0M3HEP7;A1L332;E9Q4J5;F6Q8P7;P70704;Q3U9N5;Q5DTG0	Atp8a1	Phospholipid-transporting ATPase;Phospholipid-transporting ATPase;Phospholipid-transporting ATPase;ATPase, aminophospholipid transporter (APLT), class I, type 8A, member 1;ATPase, aminophospholipid transporter (APLT), class I, type 8A, member 1 (Fragment);Phospholipid-transporting ATPase IA;ATPase, aminophospholipid transporter (APLT), class I, type 8A, member 1;Phospholipid-transporting ATPase (…	16528.8	14018.8	11892.6	3429.6	6283.93	4657.79	7776.24	13076.2	13496.9
A0A0J9YV40;P97440;Q3TSD8;Q3U4T7;Q3V2L1;Q8K2W7	A0A0J9YV40;P97440;Q3TSD8;Q3U4T7;Q3V2L1;Q8K2W7	Slbp	Stem-loop binding protein;Histone RNA hairpin-binding protein;Histone RNA hairpin-binding protein RNA-binding domain-containing protein;Histone RNA hairpin-binding protein RNA-binding domain-containing protein;Stem-loop binding protein;Slbp protein	4446.14	2379.62	4049.87	10756.9	9609.53	9499.92	5192.33	8371.42	7264.37
A0A0J9YV44;B2RR83	A0A0J9YV44;B2RR83	Ythdc2	YTH domain containing 2 (Fragment);3'-5' RNA helicase YTHDC2	13535.3	13761.8	13098.4	26128.2	26208.2	23025.8	21898.7	23715.4	22100.4
A0A0J9YV56;D3Z7P0;E9Q0U3;E9Q8Q1;Q8K3W0	A0A0J9YV56;D3Z7P0;E9Q0U3;E9Q8Q1;Q8K3W0	Babam2	BRISC and BRCA1-A complex member 2 (Fragment);BRISC and BRCA1-A complex member 2;BRISC and BRCA1-A complex member 2;BRISC and BRCA1-A complex member 2;BRISC and BRCA1-A complex member 2		742.318		982.063	1411.8	799.105	13790.6		835.502
A0A0J9YV82;Q921K9	A0A0J9YV82;Q921K9	Bcl7b	B cell CLL/lymphoma 7B (Fragment);B-cell CLL/lymphoma 7 protein family member B	9913.93	11303.9	10441.7	5098.41	7860.95	6607.98	6503.13	7545.31	11236.7
A0A0J9YV85;Q3TWY9;Q99KL7;Q9CZQ8	A0A0J9YV85;Q3TWY9;Q99KL7;Q9CZQ8	Rab28	RAB28, member RAS oncogene family;Rab28;Ras-related protein Rab-28;RAB28, member RAS oncogene family	1222.21	1772.07	3277.07	4137.38	2922.83	4802.3	2098.42	1734.21	1520.37
A0A0J9YVB2;G5E8L6;Q3UM83	A0A0J9YVB2;G5E8L6;Q3UM83	Klrg2	Killer cell lectin-like receptor subfamily G, member 2;Killer cell lectin-like receptor subfamily G, member 2;Killer cell lectin-like receptor subfamily G member 2	20414.4			18253.5	15728.9	12144.3
A0A0J9YVG0;Q61074	A0A0J9YVG0;Q61074	Ppm1g	Protein phosphatase 1G (formerly 2C), magnesium-dependent, gamma isoform;Protein phosphatase 1G	3155.03	2762.31	3440.19		2171.76	2552.06	2535.65	1887.02	1366.66
A0A0N4SUH4;A0A494BB98;A0A494BBI7;Q8BKS9	A0A0N4SUH4;A0A494BB98;A0A494BBI7;Q8BKS9	Pum3	Pumilio RNA-binding family member 3;Pumilio RNA-binding family member 3;Pumilio RNA-binding family member 3 (Fragment);Pumilio homolog 3		820.785	7398.67	2641.49	8078.97	6348.02	7318.22	7824.25	10189.4
A0A0N4SUJ2;A0A0N4SUN3;A0A0N4SV63;A0A0N4SVX9;A0A0N4SWG7;A0A0N4SWH3;E9PXU9;E9Q423;E9QL12;Q9ESD7	A0A0N4SUJ2;A0A0N4SUN3;A0A0N4SV63;A0A0N4SVX9;A0A0N4SWG7;A0A0N4SWH3;E9PXU9;E9Q423;E9QL12;Q9ESD7	Dysf	Dysferlin	2552.47	1778.12	1346.61	930.043	1061.25	930.753	1959.97	1636.59
A0A0N4SUL6;O35130;Q542P8	A0A0N4SUL6;O35130;Q542P8	Emg1	EMG1 N1-specific pseudouridine methyltransferase (Fragment);Ribosomal RNA small subunit methyltransferase NEP1;Ribosomal RNA small subunit methyltransferase NEP1				713.294	1064.11	1530.66	568.406		565.422
A0A0N4SUM3;Q91V01	A0A0N4SUM3;Q91V01	Lpcat3	Lysophosphatidylcholine acyltransferase 3;Lysophospholipid acyltransferase 5		939.203	1549.77	187.791	400.761	532.455	1490.94		1001.69
A0A0N4SUM4;P70232	A0A0N4SUM4;P70232	Chl1	Cell adhesion molecule L1-like;Neural cell adhesion molecule L1-like protein	66985.2	74478.5	77919.3	21744.6	26351.9	22489.7	10342.7	16775	16990.5
A0A0N4SUP4;Q60750;Q6IR19	A0A0N4SUP4;Q60750;Q6IR19	Epha1	Eph receptor A1;Ephrin type-A receptor 1;receptor protein-tyrosine kinase	39380.6	39180.6	53268.8	68975	63232.1	62476.5	75461.4	67291.7	68566.2
A0A0N4SUS4;A0A0N4SUT9;A0A0N4SVG7;B2RRD7;B7ZNI3;E9PXP1;Q3U109;Q80XK2;Q8C905;Q8K2E3	A0A0N4SUS4;A0A0N4SUT9;A0A0N4SVG7;B2RRD7;B7ZNI3;E9PXP1;Q3U109;Q80XK2;Q8C905;Q8K2E3	Brpf1	Bromodomain and PHD finger containing, 1;Bromodomain and PHD finger containing, 1;Bromodomain and PHD finger containing, 1;Peregrin;Brpf1 protein;Bromodomain and PHD finger containing, 1;Bromodomain and PHD finger containing, 1;Bromodomain and PHD finger containing, 1;Peregrin (Fragment);Brpf1 protein (Fragment)			17779.1	8496.89	6884.2	4633.43	2342.99		4119.76
A0A0N4SUX0;Q8JZX6	A0A0N4SUX0;Q8JZX6	Clec4a3	C-type lectin domain family 4, member a3 (Fragment);C-type lectin domain family 4, member a3	3841.5	4053.09	7146.91	4963.28	4432.48	6268.51	3575.33	3824.48	1529.14
A0A0N4SUX5;P17183;Q3UJ20;Q545V3	A0A0N4SUX5;P17183;Q3UJ20;Q545V3	Eno2	phosphopyruvate hydratase;Gamma-enolase;phosphopyruvate hydratase;phosphopyruvate hydratase	54337.7	46865.2	48889.8	29488.8	31607	38052.6	61466.6	87103.2	78979.6
A0A0N4SUY2;E9PVJ6;E9Q4I1;E9Q612;Q4U214;Q60998;Q68FL5;Q6P4T4;Q80UH9;Q80W11;Q9ERM5;Q9JLU0	A0A0N4SUY2;E9PVJ6;E9Q4I1;E9Q612;Q4U214;Q60998;Q68FL5;Q6P4T4;Q80UH9;Q80W11;Q9ERM5;Q9JLU0	Ptpro;Ptpro;Ptpro;Ptpro;Ptpro;Ptpro;Ptpro;Ptpro;;Ptpro;Ptpro;Ptpro	Protein tyrosine phosphatase, receptor type, O;Protein tyrosine phosphatase, receptor type, O;protein-tyrosine-phosphatase;Receptor-type tyrosine-protein phosphatase O;Protein tyrosine phosphatase phi, short insert variant;Protein tyrosine phosphatase phi, long insert variant;protein-tyrosine-phosphatase (Fragment);protein-tyrosine-phosphatase (Fragment);Receptor protein tyrosine phosphatase RO (…		1
A0A0N4SV00;P80313;Q3TET0;Q3THH8;Q3TIJ7;Q3UIJ0;Q8C5Q5	A0A0N4SV00;P80313;Q3TET0;Q3THH8;Q3TIJ7;Q3UIJ0;Q8C5Q5	Cct7	T-complex protein 1 subunit eta	4720.89	5107.37	5143.29	5666.75	3399.95	6340.85	2376.46	1399.45	2271.27
A0A0N4SV07;A8Y5I6;D6RDR7;Q8R5B4;Q9CWX6;Q9WV72	A0A0N4SV07;A8Y5I6;D6RDR7;Q8R5B4;Q9CWX6;Q9WV72	Asb3	Ankyrin repeat and SOCS box-containing 3;Ankyrin repeat and SOCS box-containing 3;Ankyrin repeat and SOCS box-containing 3;Ankyrin repeat and SOCS box-containing 3;SOCS box domain-containing protein;Ankyrin repeat and SOCS box protein 3	3899.63	4397.57	5413.41	4237.74	4646.42	4419.95	5644.5	2301.58	2253.84
A0A0N4SV16;Q9CZ52	A0A0N4SV16;Q9CZ52	Antxr1	Anthrax toxin receptor 1	47229.6	74365.2	71018.8	32056.6	41860.1	31791.3	19296.3	15624.9	31016.9
A0A0N4SV66;A0AUV1;A2AB79;A3KPD0;B2RVF0;B2RWH3;C0HKE1;C0HKE2;C0HKE3;C0HKE4;C0HKE5;C0HKE6;C0HKE7;C0HKE8;C0HKE9;Q149V4;Q64426;Q64523;Q6GSS7;Q8BFU2;Q8CGP4;Q8CGP5;Q8CGP6;Q8CGP7;Q8R1M2	A0A0N4SV66;A0AUV1;A2AB79;A3KPD0;B2RVF0;B2RWH3;C0HKE1;C0HKE2;C0HKE3;C0HKE4;C0HKE5;C0HKE6;C0HKE7;C0HKE8;C0HKE9;Q149V4;Q64426;Q64523;Q6GSS7;Q8BFU2;Q8CGP4;Q8CGP5;Q8CGP6;Q8CGP7;Q8R1M2	H2aj;H2ac12;H2ac25;H2ac12;Hist1h2ad;Hist2h2aa1;H2ac4;H2ac6;H2ac7;H2ac8;H2ac11;H2ac13;Hist1h2an;Hist1h2ao;Hist1h2ap;H2ac20;H2A;H2ac20;Hist2h2aa1;H2ac25;H2ac1;Hist1h2af;H2ac12;H2ac15;H2aj	Histone H2A;Histone H2A (Fragment);Histone H2A;Histone H2A;Histone H2A;Histone H2A;Histone H2A type 1-B;Histone H2A type 1-C;Histone H2A type 1-D;Histone H2A type 1-E;Histone H2A type 1-G;Histone H2A type 1-I;Histone H2A type 1-N;Histone H2A type 1-O;Histone H2A type 1-P;Histone H2A;Histone H2A (Fragment);Histone H2A type 2-C;Histone H2A type 2-A;Histone H2A type 3;Histone H2A;Histone H2A type 1-…	51906.8	47410.9	42432.7	53026.6	46005.1	42412.2	146359	147981	156693
A0A0N4SVA7;Q3U4V8;Q3UXZ9;Q3V3E9;Q921T5	A0A0N4SVA7;Q3U4V8;Q3UXZ9;Q3V3E9;Q921T5	Kdm5a	[histone H3]-trimethyl-L-lysine(4) demethylase;Lysine-specific demethylase 5A (Fragment);Lysine-specific demethylase 5A;Lysine-specific demethylase 5A (Fragment);[histone H3]-trimethyl-L-lysine(4) demethylase	3672.49	7893.7	4656.17	2394.66	2035.24	1988.57	2217.39	2153.83	2674.27
A0A0N4SVB8;Q9CQW2;Q9DAB3	A0A0N4SVB8;Q9CQW2;Q9DAB3	Arl8b	ADP-ribosylation factor-like 8B;ADP-ribosylation factor-like protein 8B;ADP-ribosylation factor-like protein 8B	8077.61	8897.9	6266.88	4016.41	3970.11	4647.62	6528.9	4462.73	4457.55
A0A0N4SVC2;E9QP00;Q6PFR5	A0A0N4SVC2;E9QP00;Q6PFR5	Tra2a	Transformer 2 alpha;Transformer 2 alpha;Transformer-2 protein homolog alpha	170839	179773	175623	106877	102985	105458	94526.9	74791	79073.7
A0A0N4SVE9;A0A0N4SWC1;Q8BH31	A0A0N4SVE9;A0A0N4SWC1;Q8BH31	Mfsd8	Major facilitator superfamily domain containing 8;Major facilitator superfamily domain containing 8 (Fragment);Major facilitator superfamily domain-containing protein 8	22190.9	8158.25	8932.59	3282.01	4817.02	3625.95	4460.36	4747.6	5454.67
A0A0N4SVK2;A0A0N4SWC5;D3YWF9;Q4VBG1;Q9CWX9	A0A0N4SVK2;A0A0N4SWC5;D3YWF9;Q4VBG1;Q9CWX9	Ddx47	RNA helicase (Fragment);ATP-dependent RNA helicase (Fragment);ATP-dependent RNA helicase (Fragment);RNA helicase;Probable ATP-dependent RNA helicase DDX47	13850.8	38810.6	45592.2	26510.4	33882.9	27360.3	40944.5	25223.1	37541
A0A0N4SVL0;A0A0R4J112;A2AMI2;Q80XI3;Z4YKC4	A0A0N4SVL0;A0A0R4J112;A2AMI2;Q80XI3;Z4YKC4	Eif4g3	Eukaryotic translation initiation factor 4 gamma, 3;Eukaryotic translation initiation factor 4 gamma, 3;Eukaryotic translation initiation factor 4 gamma, 3;Eukaryotic translation initiation factor 4 gamma 3;Eukaryotic translation initiation factor 4 gamma, 3	322272	356462	298950	370567	354713	349510	311018	306287	302511
A0A0N4SVQ1;Q62425	A0A0N4SVQ1;Q62425	Ndufa4	Ndufa4, mitochondrial complex associated;Cytochrome c oxidase subunit NDUFA4		3923.51					1715.63	2604.02	2893.36
A0A0N4SVS8;F7BP94;Q8QZV7	A0A0N4SVS8;F7BP94;Q8QZV7	Ints13;Ints13;IntS13	Integrator complex subunit 13 (Fragment);Integrator complex subunit 13 (Fragment);Integrator complex subunit 13	30605.3	31987.8	24826.6	20204.2	13493.5	17404.2	10976.2	2592.23	7852.46
A0A0N4SVT3;A0A0N4SW28;Q9DAS9	A0A0N4SVT3;A0A0N4SW28;Q9DAS9	Gng12	Guanine nucleotide-binding protein subunit gamma (Fragment);Guanine nucleotide-binding protein subunit gamma;Guanine nucleotide-binding protein G(I)/G(S)/G(O) subunit gamma-12	11659.2	10268.2	9198.78	3119.72	2503.27	2801.74	10687.9	9379.62	8224.72
A0A0N4SW06;Q3TWL5;Q91WI7	A0A0N4SW06;Q3TWL5;Q91WI7	Itfg2	Integrin alpha FG-GAP repeat containing 2;Integrin alpha FG-GAP repeat containing 2;KICSTOR complex protein ITFG2	1				0.848164
A0A0N4SW14;D3Z165;E6Y2W6;E6Y2W7;E6Y2W8;E6Y2W9;E9QP94;Q3TVA9	A0A0N4SW14;D3Z165;E6Y2W6;E6Y2W7;E6Y2W8;E6Y2W9;E9QP94;Q3TVA9	Ccdc136	Coiled-coil domain containing 136;Coiled-coil domain containing 136;Coiled-coil domain containing 136;Coiled-coil domain containing 136;Taraco (Fragment);Taraco (Fragment);Coiled-coil domain containing 136;Coiled-coil domain-containing protein 136			541.401		887.024	342.06
A0A0N4SW73;Q6ZQ33	A0A0N4SW73;Q6ZQ33	Rab11fip5	RAB11 family interacting protein 5 (class I);MKIAA0857 protein (Fragment)	25976	17908.3	17863.5	22935.4	21328.7	18699.5	16177.8	15990.5	15586.9
A0A0N4SW93	A0A0N4SW93	C2cd5	C2 calcium-dependent domain containing 5	4108.08	4668.19	3031.83	4316.52	4526.45	3391.63	1393.02	2473.74	1625.29
A0A0N4SW94;O35682;Q0VE46	A0A0N4SW94;O35682;Q0VE46	Myadm	Myeloid-associated differentiation marker (Fragment);Myeloid-associated differentiation marker;Myadm protein	4412.58	7072.34	8602.85	3969.4	4727.29	1229.96	6747.21	4444.85	7266.17
A0A0N4SWB9;F8WJ98;Q69ZZ6;Q8K2V2	A0A0N4SWB9;F8WJ98;Q69ZZ6;Q8K2V2	Tmcc1	Transmembrane and coiled coil domains 1;Transmembrane and coiled coil domains 1 (Fragment);Transmembrane and coiled-coil domains protein 1;Tmcc1 protein (Fragment)	60122.8	57861.9	56435.7	55057.6	53907.2	62618.6	60825.9	53696.5	55548.3
A0A0N5E9G7;G3UWX1;G3X8Z6;Q5U4B1	A0A0N5E9G7;G3UWX1;G3X8Z6;Q5U4B1	Rfc1	Replication factor C subunit 1	10590.7	13769.6	10048.1	28625	24635.7	25656.4	14132.2	12586.2	14810.2
A0A0R3P9C8;Q9DC69	A0A0R3P9C8;Q9DC69	Ndufa9	NADH:ubiquinone oxidoreductase subunit A9;NADH dehydrogenase [ubiquinone] 1 alpha subcomplex subunit 9, mitochondrial	365.941	1670.37	3016.71					426.673	3216.82
A0A0R4IZW5;P09803;Q4KML8	A0A0R4IZW5;P09803;Q4KML8	Cdh1	Cadherin 1;Cadherin-1;Cdh1 protein	2095.82	1991.09	4819.85	1062.24	813.298	957.045	1155.89	1196.17	723.426
A0A0R4IZW7;D3Z413;E9PWD4;H3BK68;H3BKB8;H3BKS8;H3BKV3;H3BL70;Q3TD26;Q3TX08;Q8R2M8	A0A0R4IZW7;D3Z413;E9PWD4;H3BK68;H3BKB8;H3BKS8;H3BKV3;H3BL70;Q3TD26;Q3TX08;Q8R2M8	Trmt1	tRNA (guanine(26)-N(2))-dimethyltransferase;tRNA methyltransferase 1 (Fragment);tRNA (guanine(26)-N(2))-dimethyltransferase;tRNA methyltransferase 1 (Fragment);tRNA methyltransferase 1 (Fragment);tRNA (guanine(26)-N(2))-dimethyltransferase;tRNA methyltransferase 1 (Fragment);tRNA methyltransferase 1 (Fragment);tRNA (guanine(26)-N(2))-dimethyltransferase;tRNA (guanine(26)-N(2))-dimethyltransferase…	53385.9	65553.3	68633.9	61785.8	62901.3	78490.8	18076.7	19907.2	21880.9
A0A0R4IZW9;A0A9K3FHL9	A0A0R4IZW9;A0A9K3FHL9	Sdf2	Stromal cell derived factor 2;Stromal cell derived factor 2 (Fragment)	4649.26		4251.91	14746.6	15105.8	14653.2	6298.78	6198.65	6034.6
A0A0R4IZX6;A0A0R4J1L4;Q9WVP1	A0A0R4IZX6;A0A0R4J1L4;Q9WVP1	Ap1m2	AP-1 complex subunit mu-2	1668.21	21.3476	376.768	162.994	440.599	1124.29	2426.4	809.202	1138.22
A0A0R4IZY0;Q8C1A5	A0A0R4IZY0;Q8C1A5	Thop1	Thimet oligopeptidase 1;Thimet oligopeptidase	3927.19	1528.34	731.536	2946	3373.59	3261.17	1963.33	3827.58	1293.11
A0A0R4IZZ6;A0A5F8MPU2;Q6ZQ03	A0A0R4IZZ6;A0A5F8MPU2;Q6ZQ03	Fnbp4	Formin binding protein 4;Formin binding protein 4;Formin-binding protein 4	19776.2	21068	20936.4	34860.8	38441.3	35516.3	28777.7	31814.6	26734.2
A0A0R4J002;Q91V36	A0A0R4J002;Q91V36	Nrbp2	Nuclear receptor binding protein 2;Nuclear receptor-binding protein 2	17709.7	16910.1	15791.1	12902.5	9034.07	13076.2	5461.78	15316.3	4540.67
A0A0R4J005;A0A5F8MPJ3;A8CVP1;A8CVP4;E9QP62;Q4ZJB3;Q99JW4;Q9D7B2	A0A0R4J005;A0A5F8MPJ3;A8CVP1;A8CVP4;E9QP62;Q4ZJB3;Q99JW4;Q9D7B2	Lims1	LIM and senescent cell antigen-like-containing domain protein;LIM and senescent cell antigen-like-containing domain protein;LIM and senescent cell antigen-like-containing domain protein;LIM and senescent cell antigen-like-containing domain protein;LIM and senescent cell antigen-like-containing domain protein;LIM and senescent cell antigen-like-containing domain protein;LIM and senescent cell anti…	393.915	757.309	224.589		193.147	809.076		2469.19	1557.2
A0A0R4J007;B2RQ13;B7ZMW4;B7ZMW5;P70261	A0A0R4J007;B2RQ13;B7ZMW4;B7ZMW5;P70261	Pald1	Phosphatase domain containing, paladin 1;X99384 protein;X99384 protein;cDNA sequence X99384;Paladin	10407.5	9885.03	9523.3	710.402	442.391				432.022
A0A0R4J008;P70288;Q3UXH8	A0A0R4J008;P70288;Q3UXH8	Hdac2	Histone deacetylase 2;Histone deacetylase 2;histone deacetylase (Fragment)
A0A0R4J011;E9PVV1;E9PVV2;E9PWE3;F6T941	A0A0R4J011;E9PVV1;E9PVV2;E9PWE3;F6T941	Tcf3	Transcription factor 3;Transcription factor 3;Transcription factor 3;Transcription factor 3;Transcription factor 3 (Fragment)	20923.4	28413.1	20260.6	24303.2	26620.2	22030.2	33637.9	31322.4	23405.7
A0A0R4J017;Q8CGV9	A0A0R4J017;Q8CGV9	Tshz3	Teashirt zinc finger family member 3;Teashirt homolog 3		3921.77		177.746	2990.41	194.579		238.075
A0A0R4J031	A0A0R4J031	Trim35	Tripartite motif-containing 35	3092.81	6873.76	6594.5	3412.31	5274.64	3211.1	3754.31	4966.67	4152.89
A0A0R4J032;P06683	A0A0R4J032;P06683	C9	Complement component 9;Complement component C9	1623.28	398.011	545.227	382.515	588.629	833.13	1414.2	821.957	526.37
A0A0R4J033	A0A0R4J033	Fam83f	Family with sequence similarity 83, member F	13324.6	13202.6	15948	1984.04	2801.52	2644.76		1264.93	893.258
A0A0R4J034;Q99K01	A0A0R4J034;Q99K01	Pdxdc1	Pyridoxal-dependent decarboxylase domain containing 1;Pyridoxal-dependent decarboxylase domain-containing protein 1	47827.9	41363.6	45617	64747.1	66062.4	58823.4	30014	43868.2	59613.8
A0A0R4J036;P08553	A0A0R4J036;P08553	Nefm	Neurofilament, medium polypeptide;Neurofilament medium polypeptide	118893	136284	124132	85709.2	87646.7	98242.6	73871	80721.8	88487.3
A0A0R4J038;D3YTY9;O08677	A0A0R4J038;D3YTY9;O08677	Kng1	Kininogen 1;Kininogen 1;Kininogen-1	10882.2	7209.13	9446.36	6565.08	8060.75	8009.18	2584.45	2214.67	3952.45
A0A0R4J039;A0A338P6H8;Q9ESB3	A0A0R4J039;A0A338P6H8;Q9ESB3	Hrg	Histidine-rich glycoprotein	2149.26		766.002	1406.81	233.985	947.666	879.332	518.112	1177.79
A0A0R4J055;A0A1D5RMB5;Q6TXD4	A0A0R4J055;A0A1D5RMB5;Q6TXD4	Dnmbp	Dynamin-binding protein	5535.55	7644.32	5653.29	8995.83	7869.27	17075.2	5690.2	5205.42	9403.79
A0A0R4J058;A0A0R4J242;A0A1B0GSH5;D3YWG2;G8JL55;Q922Q9	A0A0R4J058;A0A0R4J242;A0A1B0GSH5;D3YWG2;G8JL55;Q922Q9	Chid1	Chitinase domain containing 1;Chitinase domain containing 1;Chitinase domain containing 1;Chitinase domain containing 1 (Fragment);Chitinase domain containing 1 (Fragment);Chitinase domain-containing protein 1	2944.83	4909.41	5916.95		990.656	2274.25	971.038	2869.96	624.682
A0A0R4J060;J3QNK5;Q8BIH0	A0A0R4J060;J3QNK5;Q8BIH0	Sap130	Sin3A associated protein;Sin3A associated protein;Histone deacetylase complex subunit SAP130	8797.99	18034.2	6522.7	3145.96	5933.14	14296.9	1230.51	2023.32	3571.01
A0A0R4J069;Q9JLI6	A0A0R4J069;Q9JLI6	Scly	Selenocysteine lyase	568.068						3395.05
A0A0R4J073;E9PWM5;E9Q577;Q5U5Q9	A0A0R4J073;E9PWM5;E9Q577;Q5U5Q9	Uimc1	BRCA1-A complex subunit RAP80	10367.5	11809.6	8800.86	19663.6	17388.4	17427.5	19038.5		17527.9
A0A0R4J074;F6WB49;Q3TNH3;Q8K085;Q9EQQ0	A0A0R4J074;F6WB49;Q3TNH3;Q8K085;Q9EQQ0	Suv39h2	Histone-lysine N-methyltransferase;[histone H3]-lysine(9) N-trimethyltransferase (Fragment);[histone H3]-lysine(9) N-trimethyltransferase (Fragment);Histone-lysine N-methyltransferase;Histone-lysine N-methyltransferase SUV39H2			354.79	2397.58	2651.77	2609.7	818.322	1670.9
A0A0R4J075;B9EKA5;Q91V27	A0A0R4J075;B9EKA5;Q91V27	Mlph	Melanophilin						0.495297
A0A0R4J079;Q3TJW1;Q6P9T6;Q8BMP6	A0A0R4J079;Q3TJW1;Q6P9T6;Q8BMP6	Acbd3	Acyl-Coenzyme A binding domain containing 3;Golgi resident protein GCP60 (Fragment);Acyl-Coenzyme A binding domain containing 3;Golgi resident protein GCP60	27406.4	12257.4	14173.2	4135.54	5996.08	9557.15	2739.09	6940.67	3288.75
A0A0R4J083	A0A0R4J083	Acadl	Long-chain specific acyl-CoA dehydrogenase, mitochondrial	4924.14	5499.76	3981.35	4718.73	4190.04	5483.82	2809.77	3191.67	1195.92
A0A0R4J086;Q8BK62	A0A0R4J086;Q8BK62	Olfml3	Olfactomedin-like 3;Olfactomedin-like protein 3	3219.64	3044.3	2363.62	2819.21	2169.71	1481.45	1341.98	1145.69	1160.31
A0A0R4J091	A0A0R4J091	Pole3	Polymerase (DNA directed), epsilon 3 (p17 subunit)	8668.16	2164.55	3372.19	2420.37	1932.53	1520.63	3709.76	5647.31	7733.83
A0A0R4J093;Q9DBP5	A0A0R4J093;Q9DBP5	Cmpk1	UMP-CMP kinase	1469.38	368.404	1144.92	2020.41	1182.05	997.898	3965.52
A0A0R4J0B1;A0A0R4J227;E9PYX3;E9Q9N6;E9QMP6;F6ZS70;Q05512;Q3T9A3;Q3U3A1;Q571J8	A0A0R4J0B1;A0A0R4J227;E9PYX3;E9Q9N6;E9QMP6;F6ZS70;Q05512;Q3T9A3;Q3U3A1;Q571J8	Mark2	non-specific serine/threonine protein kinase;non-specific serine/threonine protein kinase;non-specific serine/threonine protein kinase;non-specific serine/threonine protein kinase;non-specific serine/threonine protein kinase;non-specific serine/threonine protein kinase (Fragment);Serine/threonine-protein kinase MARK2;non-specific serine/threonine protein kinase;non-specific serine/threonine prote…	5364.02	4887.8	5348.52	4664.54	4924.6	7241.4	2506.45	2990.14	3199.42
A0A0R4J0B3;Q3U350;Q3UFT4;Q6PB82;Q80TT3	A0A0R4J0B3;Q3U350;Q3UFT4;Q6PB82;Q80TT3	Ulk1	Serine/threonine-protein kinase;Serine/threonine-protein kinase;Serine/threonine-protein kinase;Serine/threonine-protein kinase;non-specific serine/threonine protein kinase (Fragment)	15675.9	19689.7	16906	19879.5	27424.1	23365.4	27150.9	24307.4	23001.2
A0A0R4J0C7;A0A6Q6QAE5;Q80ZV5;Q99PT3	A0A0R4J0C7;A0A6Q6QAE5;Q80ZV5;Q99PT3	Ino80b	INO80 complex subunit B;INO80 complex subunit B;Ino80b protein (Fragment);INO80 complex subunit B	22909.7	29124	21949	9277.02	7429.31	7327.39	12606.5	37798.5	18152.8
A0A0R4J0D3;Q3TDQ1	A0A0R4J0D3;Q3TDQ1	Stt3b	dolichyl-diphosphooligosaccharide--protein glycotransferase;Dolichyl-diphosphooligosaccharide--protein glycosyltransferase subunit STT3B	80263.9	95212	53286.5	30381.2	34381.1	34390	23223.6	25478.6	22143.7
A0A0R4J0D5;A0A0R4J2D4;Q6PDG8	A0A0R4J0D5;A0A0R4J2D4;Q6PDG8	Mon1a	Vacuolar fusion protein MON1 homolog;Vacuolar fusion protein MON1 homolog;Vacuolar fusion protein MON1 homolog A	42791.3	40166.6	42691.4	55607.8	55130.6	70328.3	54173.3	40424.9	45339.7
A0A0R4J0E4;Q7TQK1	A0A0R4J0E4;Q7TQK1	Ints7	Integrator complex subunit 7	2416.59	2223.84	4260.21	1863.47	2386.61	2283.33	1924.58	2812.87	1723.81
A0A0R4J0G0;A0A2I3BQL9;A0A2I3BRX1;A0A2I3BS39;Q3TDE6;Q3UGF0;Q8BH04;Q8R3X7	A0A0R4J0G0;A0A2I3BQL9;A0A2I3BRX1;A0A2I3BS39;Q3TDE6;Q3UGF0;Q8BH04;Q8R3X7	Pck2	phosphoenolpyruvate carboxykinase (GTP);phosphoenolpyruvate carboxykinase (GTP) (Fragment);phosphoenolpyruvate carboxykinase (GTP) (Fragment);phosphoenolpyruvate carboxykinase (GTP);phosphoenolpyruvate carboxykinase (GTP);phosphoenolpyruvate carboxykinase (GTP) (Fragment);Phosphoenolpyruvate carboxykinase [GTP], mitochondrial;phosphoenolpyruvate carboxykinase (GTP) (Fragment)	1928.89	7180.98	640.423	4375.97	1628.71	1646.86	1441.46	1496.89
A0A0R4J0G4;A9UGK3;Q6VN19	A0A0R4J0G4;A9UGK3;Q6VN19	Ranbp10	RAN binding protein 10;Ran binding protein 10;Ran-binding protein 10	53477.5	66322.5	80076.3	137815	146199	159721	116511	115373	96228
A0A0R4J0G7;A0A2I3BPW9;A0A2I3BQS1;Q3UGF9;Q3UX88;Q8K4R9	A0A0R4J0G7;A0A2I3BPW9;A0A2I3BQS1;Q3UGF9;Q3UX88;Q8K4R9	Dlgap5	DLG associated protein 5;DLG associated protein 5;DLG associated protein 5;Disks large-associated protein 5;Disks large-associated protein 5;Disks large-associated protein 5	1766.47	2043.63	3612.33	13574.1	16653.8	12505.4	8554.76	13342.3	9789.93
A0A0R4J0H6;A0A1Z3MHZ5;A0A1Z3MI09;A0A1Z3MI20;E9PUG6;E9QAN9;O35368	A0A0R4J0H6;A0A1Z3MHZ5;A0A1Z3MI09;A0A1Z3MI20;E9PUG6;E9QAN9;O35368	Ifi203;Ifi203a;Ifi203b;Ifi203c;Ifi203;Ifi203;Ifi203	Interferon activated gene 203;Ifi203a;Ifi203b;Ifi203c;Interferon activated gene 203;Interferon activated gene 203;Interferon-activable protein 203	2546.76	895.157	2261.32		1224.93	802.34			425.849
A0A0R4J0H8;Q6NWW9	A0A0R4J0H8;Q6NWW9	Fndc3b	Fibronectin type III domain containing 3B;Fibronectin type III domain-containing protein 3B	268757	327732	331910	154022	139605	96371.4	90015.8	98848.6	96836.1
A0A0R4J0I1	A0A0R4J0I1	Serpina3k	Serine (or cysteine) peptidase inhibitor, clade A, member 3K	100429	103688	116121	45686.4	32699.4	41233.7	28393.6	23767	22771.6
A0A0R4J0I4;E9PVJ3;E9Q2M3;Q8BIW9	A0A0R4J0I4;E9PVJ3;E9Q2M3;Q8BIW9	Chtf18	CTF18, chromosome transmission fidelity factor 18;CTF18, chromosome transmission fidelity factor 18;CTF18, chromosome transmission fidelity factor 18;Chromosome transmission fidelity protein 18 homolog				15960.2	63314.8	14581	3627.17	22524.3	22084.2
A0A0R4J0I8;Q9JL18	A0A0R4J0I8;Q9JL18	Bace2	Beta-site APP-cleaving enzyme 2;Beta-secretase 2	4404.02	1911.97	2332.03	5274.37	1922.44	4635.06	392.285	4493.78	2651.95
A0A0R4J0I9;Q91ZX7	A0A0R4J0I9;Q91ZX7	Lrp1	Low density lipoprotein receptor-related protein 1;Prolow-density lipoprotein receptor-related protein 1	5062.96	3643.85	4687.38	3361.07	3352.15	4703.18	3839.79	4184.12	4058.52
A0A0R4J0J0;Q9JHU2	A0A0R4J0J0;Q9JHU2	Palmd	Palmdelphin	51736.8	47619.6	50665.8	80066.4	72060.8	75261.8	70357.6	65068.5	71804.4
A0A0R4J0J3;A0A2R8W710;A3KMF3;Q75NR7	A0A0R4J0J3;A0A2R8W710;A3KMF3;Q75NR7	Recql4	DNA helicase;DNA helicase;DNA helicase (Fragment);ATP-dependent DNA helicase Q4	1612.12							179.832
A0A0R4J0J4;Q53ZP8;Q7TSL2;Q9QUI6	A0A0R4J0J4;Q53ZP8;Q7TSL2;Q9QUI6	Ackr1	Atypical chemokine receptor 1				1265.43	2645.88	2459.31	4610.6	5359.3	6302.87
A0A0R4J0J8;Q2KN98;Q6GQV8	A0A0R4J0J8;Q2KN98;Q6GQV8	Specc1l	Cytospin-A	3364.99	3749.99	4651.65	5692.77	5803.36	6098.27	3805.38	5641.5	4463.3
A0A0R4J0K2;A2AGT5;K3W4R5;Q80U79;Z4YL78	A0A0R4J0K2;A2AGT5;K3W4R5;Q80U79;Z4YL78	Ckap5	Cytoskeleton associated protein 5;Cytoskeleton-associated protein 5;Cytoskeleton associated protein 5;MKIAA0097 protein (Fragment);Cytoskeleton associated protein 5	6325	4053.17	1704.69					17483.2
A0A0R4J0L2;F6VNP0;Q8BJM7	A0A0R4J0L2;F6VNP0;Q8BJM7	Tyw1	tRNA-yW synthesizing protein 1 homolog (S. cerevisiae);tRNA-yW synthesizing protein 1 homolog (S. cerevisiae) (Fragment);S-adenosyl-L-methionine-dependent tRNA 4-demethylwyosine synthase TYW1
A0A0R4J0M1	A0A0R4J0M1	Tbcc	Tubulin-specific chaperone C	6245.47	12475.4	13922.7	40604.4	27293.3	26339	16401.6	11446.5	20091.1
A0A0R4J0M9;Q80T83;Q8CDG3	A0A0R4J0M9;Q80T83;Q8CDG3	Vcpip1	ubiquitinyl hydrolase 1;ubiquitinyl hydrolase 1 (Fragment);Deubiquitinating protein VCPIP1	17202.4	15564	17652.7	25465.2	24464.8	25316.9	27212.5	24602.5	24058.3
A0A0R4J0N9;A0A0R4J147;A0A0R4J1L9;Q5HZI1	A0A0R4J0N9;A0A0R4J147;A0A0R4J1L9;Q5HZI1	Mtus1	Mitochondrial tumor suppressor 1;Mitochondrial tumor suppressor 1;Mitochondrial tumor suppressor 1;Microtubule-associated tumor suppressor 1 homolog	11725.7	16921.6	21454.5	12439.1	14137.7	11482.1	15905.2	17432.9	16017.3
A0A0R4J0P5;P97814	A0A0R4J0P5;P97814	Pstpip1	Proline-serine-threonine phosphatase-interacting protein 1	6685.46	3194.65	2953.33	1438.02		1413.31	2838.66	3305.19	1504.76
A0A0R4J0P6;Q3TUQ8;Q8VDG3	A0A0R4J0P6;Q3TUQ8;Q8VDG3	Parn	Poly(A)-specific ribonuclease PARN	28231.9	32340.2	29849.7	49642.1	33619.9	40516.2	30151.6	27637.6	34891.3
A0A0R4J0Q2;B7ZMQ9;D3YUD3;D3YUL8;D3Z230;E9Q9A0;E9QAD0;F6R4N2;F6V2U0;Q0VBQ7;Q3UEQ1;Q9EPW0	A0A0R4J0Q2;B7ZMQ9;D3YUD3;D3YUL8;D3Z230;E9Q9A0;E9QAD0;F6R4N2;F6V2U0;Q0VBQ7;Q3UEQ1;Q9EPW0	Inpp4a	Inositol polyphosphate-4-phosphatase, type I;Inpp4a protein;phosphatidylinositol-3,4-bisphosphate 4-phosphatase;phosphatidylinositol-3,4-bisphosphate 4-phosphatase;phosphatidylinositol-3,4-bisphosphate 4-phosphatase;phosphatidylinositol-3,4-bisphosphate 4-phosphatase;Inositol polyphosphate-4-phosphatase, type I;Inositol polyphosphate-4-phosphatase, type I;phosphatidylinositol-3,4-bisphosphate 4-p…	4063.23	3571.94	6399.16	7514.9	9522.28	8112.98	7422.76	5985.33	7612.14
A0A0R4J0Q6;Q80VI1	A0A0R4J0Q6;Q80VI1	Trim56	RING-type E3 ubiquitin transferase;E3 ubiquitin-protein ligase TRIM56	6292.79		1068.54	978.156	9179.9	5952.18	8795.95	5846.72	7087.47
A0A0R4J0Q9;Q3TR20;Q3UM29	A0A0R4J0Q9;Q3TR20;Q3UM29	Cog7	Conserved oligomeric Golgi complex subunit 7	2264.24	5757.62	4313.24	2476.07	2121.88	1476.08	3350.9	3936.98	3044.07
A0A0R4J0S1;Q91W92	A0A0R4J0S1;Q91W92	Cdc42ep1	CDC42 effector protein (Rho GTPase binding) 1;Cdc42 effector protein 1	825.491	1762.63	816.202	817.99	2503.57	1983.68
A0A0R4J0S4	A0A0R4J0S4	Llgl1	LLGL1 scribble cell polarity complex component	546.752		1900.75	1999.5	1236.79	796.816		1150.7	324.724
A0A0R4J0S7;A0A1L1STY4;A0A1L1SVG0;Q8CGB3;Q8CIA8	A0A0R4J0S7;A0A1L1STY4;A0A1L1SVG0;Q8CGB3;Q8CIA8	Uaca	Uveal autoantigen with coiled-coil domains and ankyrin repeats;Uveal autoantigen with coiled-coil domains and ankyrin repeats (Fragment);Uveal autoantigen with coiled-coil domains and ankyrin repeats;Uveal autoantigen with coiled-coil domains and ankyrin repeats;Uaca protein					4972.76		1983.37	6716.62	4646.83
A0A0R4J0T2;D3YXD8;I3QI48;Q504P2	A0A0R4J0T2;D3YXD8;I3QI48;Q504P2	Clec12a	C-type lectin domain family 12, member a;C-type lectin domain family 12, member a (Fragment);C-type lectin domain family 12 member A (Fragment);C-type lectin domain family 12 member A				1426.75	778.095	807.482
A0A0R4J0T4;O88351;Q05DR8;Q5D0E0	A0A0R4J0T4;O88351;Q05DR8;Q5D0E0	Ikbkb	IkappaB kinase;Inhibitor of nuclear factor kappa-B kinase subunit beta;IkappaB kinase (Fragment);IkappaB kinase	32511.5	31805.6	30827.3	32184.5	28756.7	31904.9	36389.4	34681.3	31689.9
A0A0R4J0T5;P28659	A0A0R4J0T5;P28659	Celf1	CUGBP, Elav-like family member 1;CUGBP Elav-like family member 1	2653.45		8998.33	3760.76	2900.38	22888.8	6249.39		2174.2
A0A0R4J0T8;Q9D8S3	A0A0R4J0T8;Q9D8S3	Arfgap3	ADP-ribosylation factor GTPase activating protein 3;ADP-ribosylation factor GTPase-activating protein 3	2716.98	5434.48	3493.22	8806.37	8374.69	8166.06	6969.51	5961.17	4882.86
A0A0R4J0U2;Q0VGB7	A0A0R4J0U2;Q0VGB7	Ppp4r2	Protein phosphatase 4, regulatory subunit 2;Serine/threonine-protein phosphatase 4 regulatory subunit 2	8496.76	10053.9	4954.98	7221.4	10810.5	10489.9	7964.22	20036.7	11468.8
A0A0R4J0U3;O54943;Q3TN36;Q80U32	A0A0R4J0U3;O54943;Q3TN36;Q80U32	Per2;Per2;;mKIAA0347	Period circadian clock 2;Period circadian protein homolog 2;PAS domain-containing protein;MKIAA0347 protein (Fragment)	12666.8	12866.6	12660.2	7205.77	6116.27	10282.2	8536.88	9416.57	10439.2
A0A0R4J0U4;A0A1B0GT60;G3XA27;Q9JM61	A0A0R4J0U4;A0A1B0GT60;G3XA27;Q9JM61	Thsd1	Thrombospondin, type I, domain 1;Thrombospondin, type I, domain 1;Thrombospondin, type I, domain 1;Thrombospondin type-1 domain-containing protein 1	6252.14	7678.05	6276.8	5960.96	6358.42	7001.64	3231.05	4848.37	4987.72
A0A0R4J0V4;A0A1Y7VLC3;Q9QXM1	A0A0R4J0V4;A0A1Y7VLC3;Q9QXM1	Jmy	Junction-mediating and regulatory protein;Junction-mediating and regulatory protein;Junction-mediating and -regulatory protein	4755.21	478.542	2390.82	4814.93	4866.92	4767.87	5568.15	4275.4	4656.08
A0A0R4J0V5;O08847;P08775	A0A0R4J0V5;O08847;P08775	Polr2a	DNA-directed RNA polymerase subunit;DNA-directed RNA polymerase subunit;DNA-directed RNA polymerase II subunit RPB1	72134.1	74271.8	69263.8	94161.3	85690	82965.4	59960	59913.5	62217.3
A0A0R4J0X8	A0A0R4J0X8	Arhgef7	Rho guanine nucleotide exchange factor (GEF7)	15323.8	13489.7	12091.2	22510.4	19745	18698.5	26694.4	24395	21633.5
A0A0R4J0Z1;P08003	A0A0R4J0Z1;P08003	Pdia4	Protein disulfide-isomerase A4	3092	4285.97	3714.07	1838.67	1352.53	1665.96	1785.68	1347.62	1317.91
A0A0R4J0Z3;P55088;Q50H70;Q8BR89	A0A0R4J0Z3;P55088;Q50H70;Q8BR89	Aqp4	Aquaporin 4;Aquaporin-4;Aquaporin 4 M23A isoform;Aquaporin-4 (Fragment)	2872.9	4101.54	3212.18	3690.08	2622.89	2444	5109.93	3386.33	4323.81
A0A0R4J104;P98078	A0A0R4J104;P98078	Dab2	Disabled 2, mitogen-responsive phosphoprotein;Disabled homolog 2	40305.1	32492.6	34975.8	30651	22734.9	31310.1	32209.9	30976.6	29380.3
A0A0R4J107;Q8R146	A0A0R4J107;Q8R146	Apeh	Acylamino-acid-releasing enzyme (Fragment);Acylamino-acid-releasing enzyme	17392.1	17566.5	17309.2	13554.9	14072.5	13689	8680.04	9849.48	8192.65
A0A0R4J124;O54781	A0A0R4J124;O54781	Srpk2	Serine/arginine-rich protein specific kinase 2;SRSF protein kinase 2	17202.2	23091.1	17720.4	16772.3	17230.8	18522.2	21639	16842.7	14153.6
A0A0R4J127;A6H695;G3XA19	A0A0R4J127;A6H695;G3XA19	Ephx3	Epoxide hydrolase 3;Abhd9 protein;Epoxide hydrolase 3	1458.31		976.222		541.318	345.838			1611.84
A0A0R4J135;P17563;Q63836	A0A0R4J135;P17563;Q63836	Selenbp2;Selenbp1;Selenbp2	Methanethiol oxidase;Methanethiol oxidase;Selenium-binding protein 2	3905.81	1027.9	406.234	1703.67	2189.91	2085.88	840.496	1652.41
A0A0R4J139;D3YUC9;Q8BU85	A0A0R4J139;D3YUC9;Q8BU85	Msrb3	Peptide-methionine (R)-S-oxide reductase;L-methionine (R)-S-oxide reductase;Methionine-R-sulfoxide reductase B3, mitochondrial	20062.8	21922.3	2725.5	32815.2	39500.1	26934.2	12828.5	9045.4	8730.43
A0A0R4J140;Q5SW19;Z4YLI8	A0A0R4J140;Q5SW19;Z4YLI8	Cluh	Clustered mitochondria protein homolog	5523.12	4511.18	3969.83	8038.14	7402.7	7793.73	5280.96	7245.22	8619.74
A0A0R4J159;A0A286YCP6;A0A286YDI1;A0A5F8MPN9;Q9Z2E2	A0A0R4J159;A0A286YCP6;A0A286YDI1;A0A5F8MPN9;Q9Z2E2	Mbd1	Methyl-CpG binding domain protein 1;Methyl-CpG binding domain protein 1 (Fragment);Methyl-CpG binding domain protein 1;Methyl-CpG binding domain protein 1;Methyl-CpG-binding domain protein 1	13229.6	5816.69	13233	3577.78	4691.27	1803.26	509.257	375.243	798.808
A0A0R4J161;A0A0R4J1I5;D3Z726;Q9DBY0	A0A0R4J161;A0A0R4J1I5;D3Z726;Q9DBY0	Foxp4	Forkhead box P4;Forkhead box P4;Forkhead box P4;Forkhead box protein P4	4337.98	3813.59	2194.35	2114.68	859.12	3290.55	3721.36	3086.92	4106
A0A0R4J166;Q9D783	A0A0R4J166;Q9D783	Klhl40	Kelch-like 40;Kelch-like protein 40	306.085	156.738		192.246	100.122
A0A0R4J170;Q3TKT4	A0A0R4J170;Q3TKT4	Smarca4	SWI/SNF related, matrix associated, actin dependent regulator of chromatin, subfamily a, member 4;Transcription activator BRG1	202434	207140	200623	516395	639300	485533	317400	361555	311737
A0A0R4J172;B9EKY0;Q3U1Y4	A0A0R4J172;B9EKY0;Q3U1Y4	Dennd4b	DENN/MADD domain containing 4B;Dennd4b protein;DENN domain-containing protein 4B	7314.19	11132.9	9935.62	6315.36	5215.87	6749.83	8169.43	8854.22	9197.92
A0A0R4J175;Q3UQU0	A0A0R4J175;Q3UQU0	Brd9	Bromodomain containing 9;Bromodomain-containing protein 9	15891.4	14410.2	15066	31560	19520.1	19829.9	14700.5	20682.1	22166.8
A0A0R4J187;A0A2R8VHZ9;P23475	A0A0R4J187;A0A2R8VHZ9;P23475	Xrcc6	X-ray repair complementing defective repair in Chinese hamster cells 6;X-ray repair complementing defective repair in Chinese hamster cells 6;X-ray repair cross-complementing protein 6	17882.7	18286.8	15347.5	17371.5	18803.2	19038.1	28841.9	31776.9	35872.8
A0A0R4J195;F6YB25;Q9CSU0	A0A0R4J195;F6YB25;Q9CSU0	Rprd1b	Regulation of nuclear pre-mRNA domain-containing protein;Regulation of nuclear pre-mRNA domain-containing protein (Fragment);Regulation of nuclear pre-mRNA domain-containing protein 1B	57598.9	60148	56404.8	31599.1	32335.2	33821.2	27909.2	32440.7	30563.8
A0A0R4J197;A0A1L1SUF8;D3Z4M4;Q6IR38;Q8C310	A0A0R4J197;A0A1L1SUF8;D3Z4M4;Q6IR38;Q8C310	Robo4	Roundabout guidance receptor 4;Roundabout homolog 4;Roundabout guidance receptor 4;Robo4 protein;Roundabout homolog 4	11452	9549.77	6376.06	6187.22	8631.72	6945.98	12673.8	12778.9	13661.2
A0A0R4J199;Q08EC4	A0A0R4J199;Q08EC4	Cass4	Cas scaffolding protein family member 4	6280.97	1503.1	6468.32	2276.63		2344.9	805.301
A0A0R4J1A7;Q62431	A0A0R4J1A7;Q62431	Arid3a	AT-rich interactive domain-containing protein 3;AT-rich interactive domain-containing protein 3A	2189.6	3244.35	3248.55	9895.33	12006.2	11226.2	3651.89	7456.14	1348.96
A0A0R4J1A8	A0A0R4J1A8	Tnnt3	Troponin T3, skeletal, fast	410944	395132	378885	140725	139771	154041	292668	311869	298119
A0A0R4J1A9;Q69ZV4;Q8VC66	A0A0R4J1A9;Q69ZV4;Q8VC66	Ssx2ip	Synovial sarcoma, X 2 interacting protein;MKIAA0923 protein (Fragment);Afadin- and alpha-actinin-binding protein
A0A0R4J1B1	A0A0R4J1B1	Tnnt3	Troponin T3, skeletal, fast	233034	388851	480105	235091	230169	291583	383320	406836	439806
A0A0R4J1B6;Q6PAL8	A0A0R4J1B6;Q6PAL8	Dennd5a	DENN/MADD domain containing 5A;DENN domain-containing protein 5A	17048.5	17519.4	18125	14418.6	12071.1	14370.5	15895.1	15398.8	16526
A0A0R4J1C2;O88456	A0A0R4J1C2;O88456	Capns1	Calpain, small subunit 1;Calpain small subunit 1	13752.1	17468.9	16393.4	8489.09	17464.1	11821.9	8525.81	4633.7	6958.31
A0A0R4J1D5;F6QMQ3;O70374;Q3UGB2	A0A0R4J1D5;F6QMQ3;O70374;Q3UGB2	Cbfa2t2	CBFA2/RUNX1 translocation partner 2;CBFA2/RUNX1 translocation partner 2 (Fragment);Protein CBFA2T2;CBFA2/RUNX1 translocation partner 2	8933.37	15054.2	8720.57	5414.35	4760.45	4615.17	10874.8	12033.9	9797.8
A0A0R4J1E3;Q3TRK3;Q9QXS6	A0A0R4J1E3;Q3TRK3;Q9QXS6	Dbn1	Drebrin 1;ADF-H domain-containing protein;Drebrin	22885.2	19246.8	23103.4	31098.2	32463.3	28703.1	24982.9	26125.2	21567.8
A0A0R4J1F2;D3Z0X1;Q3U4P5;Q61144	A0A0R4J1F2;D3Z0X1;Q3U4P5;Q61144	Psen2	Presenilin;Presenilin 2 (Fragment);Presenilin;Presenilin-2	15310.8	15962.6	17827.1	14702.6	14016.8	16862	13595.2	15692.7	13674.4
A0A0R4J1F4;A2AGQ2;A2AGQ3;A2AGQ4;A2AGQ5;A2AGQ6;A2AGQ7;A2AGQ8;A2AGQ9;A2AGR0;A2AGR1;E9QN47;Q80U28	A0A0R4J1F4;A2AGQ2;A2AGQ3;A2AGQ4;A2AGQ5;A2AGQ6;A2AGQ7;A2AGQ8;A2AGQ9;A2AGR0;A2AGR1;E9QN47;Q80U28	Madd	MAP kinase-activating death domain protein	3104.77	2587.06	8316.25	4127.97	4188.43	4370.82	6651.24	4381.65	6666.92
A0A0R4J1F8;A0A2K6EDP7;P59328	A0A0R4J1F8;A0A2K6EDP7;P59328	Wdhd1	WD repeat and HMG-box DNA binding protein 1;WD repeat and HMG-box DNA binding protein 1;WD repeat and HMG-box DNA-binding protein 1	7686.87	7694.4	139.712	17300.8	21237.5	22027.5	7222.41	16683.6	17426.2
A0A0R4J1G4;A0A0R4J1H1;Q8C551	A0A0R4J1G4;A0A0R4J1H1;Q8C551	Rad51ap1	RAD51 associated protein 1;RAD51 associated protein 1;RAD51-associated protein 1				3393.21	5982.29	5963.74	4434.14	5111.85	5209.3
A0A0R4J1G9;D3YTP0;Q8CI59	A0A0R4J1G9;D3YTP0;Q8CI59	Steap3	STEAP family member 3;STEAP family member 3 (Fragment);Metalloreductase STEAP3	57821.9	63607.8	48997.7	45605.2	38114.2	37468.2	28340.5	32631.9	25285.6
A0A0R4J1H6;E9QP99;P55937	A0A0R4J1H6;E9QP99;P55937	Golga3	Golgi autoantigen, golgin subfamily a, 3;Golgi autoantigen, golgin subfamily a, 3;Golgin subfamily A member 3	8826.43	9688.85	11892.3	16295.6	21991.4	10820.4	13816.6	5897.85	11991.2
A0A0R4J1H8;A0A286YDQ8;E9Q6I3;E9QMY5;Q9QXN0	A0A0R4J1H8;A0A286YDQ8;E9Q6I3;E9QMY5;Q9QXN0	Shroom3	Shroom family member 3;Shroom family member 3;Shroom family member 3;Shroom family member 3;Protein Shroom3	7977.65	8385.21	6397	15828.4	12772.2	15028.7	10856.3	8730.81	9573.89
A0A0R4J1I0;Q8C796	A0A0R4J1I0;Q8C796	Rcor2	REST corepressor 2		22668.5	19435.5	12140.1	7131.09	8760.66	19059.3	17495.8
A0A0R4J1I2;Q8R0L9	A0A0R4J1I2;Q8R0L9	Tada3	Transcriptional adapter 3	4190.85	6369.04	5403.5	5265.56	4761.9	5172.36	5835.92	1498.55	7504.05
A0A0R4J1I6;F6XGN0;Q8C5C6;Q9QY81	A0A0R4J1I6;F6XGN0;Q8C5C6;Q9QY81	Nup210	Nucleoporin 210;Nucleoporin 210 (Fragment);Uncharacterized protein (Fragment);Nuclear pore membrane glycoprotein 210	12019.8	15437.5	12651.6	51990.1	51084.4	48309.9	56850.1	60027.2	61612.8
A0A0R4J1K1;E9QA19;Q05BG1;Q3TMD4;Q8BT14	A0A0R4J1K1;E9QA19;Q05BG1;Q3TMD4;Q8BT14	Cnot4	CCR4-NOT transcription complex, subunit 4;CCR4-NOT transcription complex, subunit 4;CCR4-NOT transcription complex, subunit 4;CCR4-NOT transcription complex subunit 4;CCR4-NOT transcription complex subunit 4	6021.07	6790.08	7361.3	7548.67	13103.5	9982.89	12468.8	12935	7640.34
A0A0R4J1L0;A0A5F8MPC4;A0A5F8MPM0;A0A5F8MQ87;D3Z3U5;D3Z3U6;D3Z3U7;G3X9X7;O54967	A0A0R4J1L0;A0A5F8MPC4;A0A5F8MPM0;A0A5F8MQ87;D3Z3U5;D3Z3U6;D3Z3U7;G3X9X7;O54967	Tnk2	non-specific protein-tyrosine kinase;non-specific protein-tyrosine kinase;non-specific protein-tyrosine kinase;non-specific protein-tyrosine kinase;non-specific protein-tyrosine kinase;non-specific protein-tyrosine kinase;Tyrosine kinase, non-receptor, 2;non-specific protein-tyrosine kinase;Activated CDC42 kinase 1	34577.3	32324.8	27842.4	14200.2	13049.2	14684.2	6988.19	9836.1	6869.54
A0A0R4J1L1;Q9D504	A0A0R4J1L1;Q9D504	Ankrd7	Ankyrin repeat domain 7;Ankyrin repeat domain-containing protein 7	1061.68				651.707		283.684	907.847	1666.32
A0A0R4J1L2;P57776;Q80T06;Q91VK2	A0A0R4J1L2;P57776;Q80T06;Q91VK2	Eef1d	Eukaryotic translation elongation factor 1 delta (guanine nucleotide exchange protein);Elongation factor 1-delta;Eukaryotic translation elongation factor 1 delta (guanine nucleotide exchange protein);Eef1d protein	42792.2	45810	54258.1	43958.8	40145.1	46594.9	52360.9	47689.2	55669.3
A0A0R4J1L3;A0A286YDF9;D3YTV4;Q5RJ53;Q8BSQ2	A0A0R4J1L3;A0A286YDF9;D3YTV4;Q5RJ53;Q8BSQ2	Zkscan3	Zinc finger with KRAB and SCAN domains 3;Zinc finger with KRAB and SCAN domains 3;Zinc finger with KRAB and SCAN domains 3;Zinc finger with KRAB and SCAN domains 3;Zinc finger protein with KRAB and SCAN domains 3	3892.4	1375.95	2852.82	4232.7	4844.42	5131.43	3894.03	5729.73	2722.67
A0A0R4J1L6;Q5DTU0	A0A0R4J1L6;Q5DTU0	Afap1l2	Actin filament associated protein 1-like 2;Actin filament-associated protein 1-like 2	2658.08	3217.09	2998.33	2551.7	1999.94	4678.77	1204.13
A0A0R4J1P2;P21107	A0A0R4J1P2;P21107	Tpm3	Tropomyosin 3, gamma;Tropomyosin alpha-3 chain	9565.26	4637.53	28616.9	10847.3	26425.7	34827		3661.22	4728.93
A0A0R4J1R1;D3Z1Y1;E9QQ99;Q9DBY1	A0A0R4J1R1;D3Z1Y1;E9QQ99;Q9DBY1	Syvn1	Synovial apoptosis inhibitor 1, synoviolin;Synovial apoptosis inhibitor 1, synoviolin;Synovial apoptosis inhibitor 1, synoviolin;E3 ubiquitin-protein ligase synoviolin	7064.21	4790.91	1144.83	5173.02	6709.28	5545.3	5735.14	11468.9	5337.3
A0A0R4J1R7	A0A0R4J1R7	Pcbd2	4a-hydroxytetrahydrobiopterin dehydratase	2620.33	8593.57	7422.36	1775.92	3132.18	4692.94	7004.55	6982.19	7428.33
A0A0R4J1S2;D3Z4N6;E9QMI6;E9QP07;F6XW22;Q80W14	A0A0R4J1S2;D3Z4N6;E9QMI6;E9QP07;F6XW22;Q80W14	Prpf40b	Pre-mRNA processing factor 40B;Pre-mRNA processing factor 40B;Pre-mRNA processing factor 40B (Fragment);Pre-mRNA processing factor 40B;Pre-mRNA processing factor 40B (Fragment);Pre-mRNA-processing factor 40 homolog B	10562	8188.25	7871	7163	5372.08	5432.36	6113.04	5038.27	7111.14
A0A0R4J1T3;B2RY27;Q8BYC6	A0A0R4J1T3;B2RY27;Q8BYC6	Taok3	TAO kinase 3 (Fragment);Taok3 protein;Serine/threonine-protein kinase TAO3	6740.15	6648.25	9700.11	7514.91	8963.62	9691.03	8223.95	8158.01	6538.17
A0A0R4J1W0;B7ZWM6;B9EKP8;Q3UTJ2	A0A0R4J1W0;B7ZWM6;B9EKP8;Q3UTJ2	Sorbs2	Sorbin and SH3 domain containing 2;Sorbin and SH3 domain containing 2;Sorbin and SH3 domain containing 2;Sorbin and SH3 domain-containing protein 2	5577.26	4949.12	4353.25		5789.69	4141.18	6342.8	6071.59	4655.63
A0A0R4J1W7;Q3TEF0;Q8BGZ4	A0A0R4J1W7;Q3TEF0;Q8BGZ4	Cdc23	CDC23 cell division cycle 23;Uncharacterized protein (Fragment);Cell division cycle protein 23 homolog	9052.36	29352	17852.1	3688.08	3389.89	3662.19	14456.6	17652	12151.4
A0A0R4J1Y7;E9PXX7;Q3TEE8;Q3UBW8;Q3UWX1;Q91W90	A0A0R4J1Y7;E9PXX7;Q3TEE8;Q3UBW8;Q3UWX1;Q91W90	Txndc5	protein disulfide-isomerase;protein disulfide-isomerase;protein disulfide-isomerase;protein disulfide-isomerase;protein disulfide-isomerase (Fragment);Thioredoxin domain-containing protein 5	1298.7	1364.58	993.187	640.707	985.108	409.02	154.063	847.337	639.766
A0A0R4J1Y9;A0A0R4J1Z9;E9QKK4;Q8K3I9	A0A0R4J1Y9;A0A0R4J1Z9;E9QKK4;Q8K3I9	Glcci1	Glucocorticoid induced transcript 1;Glucocorticoid induced transcript 1;Glucocorticoid induced transcript 1;Glucocorticoid-induced transcript 1 protein	6658.44	5988.88	6806.93	20309.6	14827.5	17376.2	12279.3	14223	14872.2
A0A0R4J1Z2;Q14B98	A0A0R4J1Z2;Q14B98	Pheta2	Sesquipedalian;Sesquipedalian-2	15877.9	14747.8	12383.7	3646.78	5316.57	2596.13	10254.8	8435.15	6474.88
A0A0R4J205;B9EIT8;E0CY61;E0CZ56;Q8C1Z8	A0A0R4J205;B9EIT8;E0CY61;E0CZ56;Q8C1Z8	Trmt10a	tRNA methyltransferase 10 homolog A;tRNA methyltransferase 10 homolog A;tRNA methyltransferase 10A (Fragment);tRNA methyltransferase 10A (Fragment);tRNA methyltransferase 10 homolog A	8975.76	5108.49	5516.84	9427.85	10332.7	8503.52	7805.54	6601.85	5634.05
A0A0R4J221	A0A0R4J221	Plec	Plectin (Fragment)	7826.5	4877.4		338.843	406.634	4189.12	1188.03
A0A0R4J243;Q8BR65	A0A0R4J243;Q8BR65	Suds3	Suppressor of defective silencing 3 homolog (S. cerevisiae);Sin3 histone deacetylase corepressor complex component SDS3	30657.8	25153.3	32145.6	35009.5	35255.9	32130.7	57814.5	63420.9	67568.1
A0A0R4J257;B2RUP2;Q80UG7	A0A0R4J257;B2RUP2;Q80UG7	Unc13d	Unc-13 homolog D;Protein unc-13 homolog D;Unc13d protein	44649.8	47372	46386.8	46468.2	49597.8	50273.9	54087.2	61718.8	62872.5
A0A0R4J259;G3UZ48;G3UZI2;G3V018;Q7TMK9	A0A0R4J259;G3UZ48;G3UZI2;G3V018;Q7TMK9	Syncrip	Synaptotagmin binding, cytoplasmic RNA interacting protein;Synaptotagmin binding, cytoplasmic RNA interacting protein;Synaptotagmin binding, cytoplasmic RNA interacting protein;Synaptotagmin binding, cytoplasmic RNA interacting protein;Heterogeneous nuclear ribonucleoprotein Q	3081.71	3082.18	3208.71	2514.56	2707.23	2367.01	1917.16	2224.02	1929.07
A0A0R4J260;B2RRE7	A0A0R4J260;B2RRE7	Otud4	ubiquitinyl hydrolase 1;OTU domain-containing protein 4	8593.73	9866.76	11235.9	20013.8	19688.7	18363.9	13520.5	16611.7	14535.9
A0A0R4J262;Q8K136	A0A0R4J262;Q8K136	Scnm1	Sodium channel modifier 1	3546.86	3790.07	2246.67	4426.78	3547.17	3017.05	3496.39	2671.11	5720.22
A0A0R4J275;F6RBR6;Q5M9K5;Q7TMF3;Q8BME2	A0A0R4J275;F6RBR6;Q5M9K5;Q7TMF3;Q8BME2	Ndufa12	NADH dehydrogenase [ubiquinone] 1 alpha subcomplex subunit 12				1	1.69293
A0A0R4J289;P35383	A0A0R4J289;P35383	P2ry2	P2Y purinoceptor 2	16457.6	17727.1	15708.8	8549.29	8197.86	6534.34	15156.6	13138.7	11752.1
A0A0R4J293	A0A0R4J293	Tgm1	Transglutaminase 1, K polypeptide	182763	133358	146848	66680.9	76948.2	80346.3	72610.6	56247.9	85082
A0A0R4J2B2;Q6WVG3	A0A0R4J2B2;Q6WVG3	Kctd12	Potassium channel tetramerisation domain containing 12;BTB/POZ domain-containing protein KCTD12	24494.4	23603.2	16667.5	31156.2	31424.8	31531.2	23659.2	29280.4	36053.5
A0A0R4J2D3;Q8BI84	A0A0R4J2D3;Q8BI84	Mia3	MIA SH3 domain ER export factor 3;Transport and Golgi organization protein 1 homolog	37346.4	33656	32145.2	16959.6	16789	18088.2	31314.6	23549.4	22575.2
A0A0R5RP39;A0A0R5RP40;A0A0R5RP42;Q9R053	A0A0R5RP39;A0A0R5RP40;A0A0R5RP42;Q9R053	Scn11a	Sodium channel protein;Sodium channel protein;Sodium channel protein;Sodium channel protein type 11 subunit alpha	5277.48	2567.5	5467.32	2242.77	4037.48	4800.6	3369.44	6497.75	8648.92
A0A0U1RNG1;A0A0U1RNN2;A0A0U1RP07;Q3U4A3;Q69ZP6;Q9CWK3	A0A0U1RNG1;A0A0U1RNN2;A0A0U1RP07;Q3U4A3;Q69ZP6;Q9CWK3	Cd2bp2	CD2 cytoplasmic tail binding protein 2 (Fragment);CD2 cytoplasmic tail binding protein 2;CD2 cytoplasmic tail binding protein 2 (Fragment);GYF domain-containing protein;MKIAA1178 protein (Fragment);CD2 antigen cytoplasmic tail-binding protein 2	1408.14	735.852	877.606	912.497	783.952	675.252
A0A0U1RNJ1;P19096	A0A0U1RNJ1;P19096	Fasn	Fatty acid synthase	4592.48	4648.31	4652.82	6063.79	5162.54	5620.43	4181.79	5434.42	4879
A0A0U1RNK6;A0A0U1RNT6;Q3TED1;Q3THS6;Q3TSS0;Q3UAP7;Q3UZA2;Q6PE05;Q99J57	A0A0U1RNK6;A0A0U1RNT6;Q3TED1;Q3THS6;Q3TSS0;Q3UAP7;Q3UZA2;Q6PE05;Q99J57	Mat2a	S-adenosylmethionine synthase;S-adenosylmethionine synthase;S-adenosylmethionine synthase;S-adenosylmethionine synthase isoform type-2;S-adenosylmethionine synthase;S-adenosylmethionine synthase;S-adenosylmethionine synthase;S-adenosylmethionine synthase;S-adenosylmethionine synthase	16840.2		10851.1		1820.27	1969.88
A0A0U1RNL7;A0A0U1RPT4;A0A0U1RQ97;D3Z7R0;O55028;Q3UC13;Q3UCB5;Q8C6H9	A0A0U1RNL7;A0A0U1RPT4;A0A0U1RQ97;D3Z7R0;O55028;Q3UC13;Q3UCB5;Q8C6H9	Bckdk	Protein-serine/threonine kinase;Protein-serine/threonine kinase;Protein-serine/threonine kinase (Fragment);Protein-serine/threonine kinase (Fragment);[3-methyl-2-oxobutanoate dehydrogenase [lipoamide]] kinase, mitochondrial;Protein-serine/threonine kinase;Protein-serine/threonine kinase;Protein-serine/threonine kinase	56723.3	56322.3	66806.3	15608.5	15558.3	14235.6	46548.4	58570.4	51929.3
A0A0U1RNN5;P15702;Q544C5	A0A0U1RNN5;P15702;Q544C5	Spn	Sialophorin (Fragment);Leukosialin;Sialophorin	5353.41	1375.75	2677.47	5481.33	2524.92	5396.65	2685.62	2819.75	4165.35
A0A0U1RNN7;A0A0U1RPN4	A0A0U1RNN7;A0A0U1RPN4	Emsy	EMSY, BRCA2-interacting transcriptional repressor (Fragment);EMSY, BRCA2-interacting transcriptional repressor (Fragment)		4622.17		2154.09	916.348	1875.25	5071.27
A0A0U1RNR6;Q6NV66;Q6ZQE2	A0A0U1RNR6;Q6NV66;Q6ZQE2	Zfp646	Zinc finger protein 646 (Fragment);Zinc finger protein 646;MKIAA0296 protein (Fragment)	3420.83	2668.2	3025.55	6660.1	5703.69	6937.67	7210.17	6552.03	5840.47
A0A0U1RNV6;Q05BY0;Q6PCM1;Q8BUV0;Q8BX11	A0A0U1RNV6;Q05BY0;Q6PCM1;Q8BUV0;Q8BX11	Kdm3a	Lysine-specific demethylase (Fragment);Lysine-specific demethylase (Fragment);Lysine-specific demethylase 3A;Uncharacterized protein;Uncharacterized protein (Fragment)				2878.61		12535.9	12039.9		13698.9
A0A0U1RNW0;A0A0U1RP94;A0A0U1RPD7;A0A0U1RPL1;A0A0U1RPM8;A0A494BAP2;Q6P2B2;Q8BTH8;Q8BVP5;Q8C4X2;Q99K78	A0A0U1RNW0;A0A0U1RP94;A0A0U1RPD7;A0A0U1RPL1;A0A0U1RPM8;A0A494BAP2;Q6P2B2;Q8BTH8;Q8BVP5;Q8C4X2;Q99K78	Csnk1g1;Csnk1g1;Csnk1g1;Csnk1g1;Csnk1g1;Csnk1g3;Csnk1g1;Csnk1g1;Csnk1g2;Csnk1g3;Csnk1g2	non-specific serine/threonine protein kinase;non-specific serine/threonine protein kinase;non-specific serine/threonine protein kinase;non-specific serine/threonine protein kinase (Fragment);non-specific serine/threonine protein kinase;non-specific serine/threonine protein kinase;non-specific serine/threonine protein kinase;Casein kinase I isoform gamma-1;Casein kinase I isoform gamma-2;Casein ki…	1149.93				47.0853
A0A0U1RNW8;A0A0U1RPC1;E9PUW0;P40645;Q3V1J7;Q8BSS6	A0A0U1RNW8;A0A0U1RPC1;E9PUW0;P40645;Q3V1J7;Q8BSS6	Sox6	SRY (sex determining region Y)-box 6;SRY (sex determining region Y)-box 6;SRY (sex determining region Y)-box 6;Transcription factor SOX-6;HMG box domain-containing protein;SRY (sex determining region Y)-box 6	61370.1	59095.8	59301.3	31215.2	30179.7	32485.5	31276.2	26413.8	25430
A0A0U1RNX4;A0A0U1RPG9;Q3TLD5;Q3TNS3	A0A0U1RNX4;A0A0U1RPG9;Q3TLD5;Q3TNS3	Uri1	URI1, prefoldin-like chaperone (Fragment);URI1, prefoldin-like chaperone (Fragment);Unconventional prefoldin RPB5 interactor;URI1 prefoldin like chaperone (Fragment)	631.653	2024.19	4232.97	2261.75	2963.75	869.511		2012.09	1626.96
A0A0U1RNX8;A0A0U1RP14;O08664	A0A0U1RNX8;A0A0U1RP14;O08664	Bcl7c	B cell CLL/lymphoma 7C;B cell CLL/lymphoma 7C (Fragment);B-cell CLL/lymphoma 7 protein family member C	20231.3	37622	21540.3	8385.91	8635.21	7531.08	8337.58	8251.7	8357.92
A0A0U1RNZ3;A0A0U1RPA2;Q3TDH2;Q6PAL5;Q6ZQD1;Q8C5X1	A0A0U1RNZ3;A0A0U1RPA2;Q3TDH2;Q6PAL5;Q6ZQD1;Q8C5X1	Garre1	Granule associated Rac and RHOG effector 1;Granule associated Rac and RHOG effector 1 (Fragment);KIAA0355;DUF4745 domain-containing protein;MKIAA0355 protein (Fragment);Granule associated Rac and RHOG effector 1	5717.99	4975.56	4974.46	5552.64	6686.24	7763.82	5283.99	2141.08	1576.62
A0A0U1RP03;O54957;Q546H1;Q80UR6;Q8C2E5	A0A0U1RP03;O54957;Q546H1;Q80UR6;Q8C2E5	Lat	Linker for activation of T cells;Linker for activation of T-cells family member 1;Linker protein;Linker for activation of T cells;Linker for activation of T-cells family member 1	2273.67	2091.19	4807.97	2966.04	3865.52	1209.15		1736.14
A0A0U1RP90;Q8K2F8	A0A0U1RP90;Q8K2F8	Lsm14a	LSM14A mRNA processing body assembly factor (Fragment);Protein LSM14 homolog A	266890	214010	195930	303760	282325	309177	264126	248233	282110
A0A0U1RPA0;Q3UIL6	A0A0U1RPA0;Q3UIL6	Plekha7	Pleckstrin homology domain containing, family A member 7 (Fragment);Pleckstrin homology domain-containing family A member 7	12349.5	12213.7	10435.9	10287.8	11235.9	9529.46	8857.02	9009.53	7902.17
A0A0U1RPC2;A0A0U1RPX0;Q3U2K4;Q9CRA8	A0A0U1RPC2;A0A0U1RPX0;Q3U2K4;Q9CRA8	Exosc5	Exosome component 5;Exosome component 5;Exosome complex component RRP46;Exosome complex component RRP46	14127.8	12041.6	12293.5	11167.8	10264.5	10774.4	10835.4	12656.5	12256.8
A0A0U1RPD3;A0A0U1RPE1;D3Z3Y4;P70318;Q545C1;Q6NVC2;Q921W2	A0A0U1RPD3;A0A0U1RPE1;D3Z3Y4;P70318;Q545C1;Q6NVC2;Q921W2	Tial1	Tia1 cytotoxic granule-associated RNA binding protein-like 1;Tia1 cytotoxic granule-associated RNA binding protein-like 1 (Fragment);Tia1 cytotoxic granule-associated RNA binding protein-like 1;Nucleolysin TIAR;RRM domain-containing protein;Tial1 protein (Fragment);Tia1 cytotoxic granule-associated RNA binding protein-like 1	16638.6			17403.8	22368.6	16745.4	26039.8	24772.5
A0A0U1RPD8;Q3UHL0;Q8K284	A0A0U1RPD8;Q3UHL0;Q8K284	Gtf3c1	General transcription factor III C 1;B-block binding subunit of TFIIIC domain-containing protein;General transcription factor 3C polypeptide 1			2120.23	2749.75	4705.46	2865.71
A0A0U1RPF6	A0A0U1RPF6	Ino80e	INO80 complex subunit E (Fragment)				300.955	232.318
A0A0U1RPI1;Q9Z239	A0A0U1RPI1;Q9Z239	Fxyd1	FXYD domain-containing ion transport regulator 1;Phospholemman	13486.5	15613.8	14891.8	2821.47	3245.91	3417.53	15122	15940	14735.1
A0A0U1RPJ4;A0A0X1KG60;Q3U319	A0A0U1RPJ4;A0A0X1KG60;Q3U319	Rnf40	E3 ubiquitin protein ligase;E3 ubiquitin protein ligase;E3 ubiquitin-protein ligase BRE1B	567.455			308.385	305.802	712.045	659.285	580.538
A0A0U1RPK4	A0A0U1RPK4	Slc3a2	Solute carrier family 3 (activators of dibasic and neutral amino acid transport), member 2
A0A0U1RPL0;Q3TGG2;Q7TQH0	A0A0U1RPL0;Q3TGG2;Q7TQH0	Atxn2l	Ataxin 2-like;Ataxin 2-like;Ataxin-2-like protein	171445	171919	156207	132596	134051	137924	129491	129302	123954
A0A0U1RPS0;P62743;Q3UJ76	A0A0U1RPS0;P62743;Q3UJ76	Ap2s1	Adaptor-related protein complex 2, sigma 1 subunit;AP-2 complex subunit sigma;AP complex subunit sigma	16223.3	15074.8	14988.7	1459.72	1771.99	2429.53	8166.1	6881.78	6432.46
A0A0U1RPW2	A0A0U1RPW2	Tjp1	Tight junction protein 1	26586.8	29514.2	27621.9	45113.9	41166.5	45832.2	27180.4	35698.2	37779.9
A0A0U1RQ20;Q54AA2;Q9EPB4	A0A0U1RQ20;Q54AA2;Q9EPB4	Pycard	PYD and CARD domain containing (Fragment);Apoptosis-associated speck-like protein containing CARD;Apoptosis-associated speck-like protein containing a CARD	3571.53	9469.57	6729.68	2801.11	6067.08	3021.65		5545.11	5326.52
A0A0U1RQ41;F6TDZ2;Q571K5;Q6DI95;Q6P2B1;Q8K368	A0A0U1RQ41;F6TDZ2;Q571K5;Q6DI95;Q6P2B1;Q8K368	Fanci;Tnpo3;Tnpo3;Tnpo3;Tnpo3;Fanci	Fanconi anemia, complementation group I (Fragment);Transportin 3 (Fragment);MKIAA4133 protein (Fragment);Transportin 3;Transportin-3;Fanconi anemia group I protein homolog					689.455	416.604
A0A0U1RQ57	A0A0U1RQ57	Cdipt	CDP-diacylglycerol--inositol 3-phosphatidyltransferase (phosphatidylinositol synthase)		3943.07	9515.42	5705.7	5731.3	4467.77		3378.59
A0A0U1RQ65;Q05CE3;Q3UHK8;Q6ZPQ4;Q8BNF0	A0A0U1RQ65;Q05CE3;Q3UHK8;Q6ZPQ4;Q8BNF0	Tnrc6a	Trinucleotide repeat containing 6a (Fragment);Tnrc6a protein (Fragment);Trinucleotide repeat-containing gene 6A protein;MKIAA1460 protein (Fragment);Argonaute hook domain-containing protein (Fragment)	10396.2	5169.31	7772.48	1926.2	1261.23	2047.14			583.308
A0A0U1RQA3;F6XT04;Q3UJV1	A0A0U1RQA3;F6XT04;Q3UJV1	Ccdc61	Coiled-coil domain containing 61 (Fragment);Coiled-coil domain containing 61 (Fragment);Centrosomal protein CCDC61	3828.46	3834.29	3419.67	3153.19	2283.92	2366.19	2444.99	930.357	1573.85
A0A0U1RQB6;F8VPR5;P45481;Q8QZV8	A0A0U1RQB6;F8VPR5;P45481;Q8QZV8	Crebbp;Crebbp;Crebbp;	histone acetyltransferase;histone acetyltransferase;Histone lysine acetyltransferase CREBBP;histone acetyltransferase (Fragment)	2013.81	2136.76	3013.69	2861.2	3430.78	3822.97	7519.73	12323.2	11172.5
A0A140LHA2;Q9WVA3	A0A140LHA2;Q9WVA3	Bub3	BUB3 mitotic checkpoint protein;Mitotic checkpoint protein BUB3	22105.8	39760.8	24894.1	18766.5	13948	15145.3	19070.5	16637.8	17550.4
A0A140LHB3;A0A140LHJ3;A0A140LHZ5;A0A140LIS6;A0A140LJK5;D3Z158;Q3TIN2;Q8BML9	A0A140LHB3;A0A140LHJ3;A0A140LHZ5;A0A140LIS6;A0A140LJK5;D3Z158;Q3TIN2;Q8BML9	Qars;Qars;Qars;Qars;Qars;Qars;Qars;Qars1	Glutaminyl-tRNA synthetase (Fragment);Glutaminyl-tRNA synthetase (Fragment);Glutaminyl-tRNA synthetase (Fragment);Glutaminyl-tRNA synthetase;Glutaminyl-tRNA synthetase (Fragment);glutamine--tRNA ligase;glutamine--tRNA ligase;Glutamine--tRNA ligase	3758.07	5632.12	1304.66		4090.71	6694.85	9610.61	4027.53
A0A140LHF7;A0A140LJF4;A0A171KXD3;Q3TPF5;Q3UIG8;Q80WB1;Q80WV6;Q8C2D7;Q9JIF0	A0A140LHF7;A0A140LJF4;A0A171KXD3;Q3TPF5;Q3UIG8;Q80WB1;Q80WV6;Q8C2D7;Q9JIF0	Prmt1	Protein arginine N-methyltransferase 1;Protein arginine N-methyltransferase 1 (Fragment);Protein arginine N-methyltransferase 1;Methyltransferase domain-containing protein;Methyltransferase domain-containing protein;Prmt1 protein (Fragment);Prmt1 protein;Methyltransferase domain-containing protein;Protein arginine N-methyltransferase 1	7482.33	2799.36	5258.31	1727.77	1634.31	2000.33	1705.81	2160.54	2631.09
A0A140LHS5;A0A2I3BR95;Q3UV75;Q5SXE4;Q61097	A0A140LHS5;A0A2I3BR95;Q3UV75;Q5SXE4;Q61097	Ksr1	Kinase suppressor of ras 1 (Fragment);non-specific serine/threonine protein kinase;non-specific serine/threonine protein kinase;non-specific serine/threonine protein kinase;Kinase suppressor of Ras 1	1513.4	6236.99	2651.7	2813.07	1290.95	4656.38	1536.27	168187	2437.3
A0A140LHY7;A0A140LIW6;Q3THQ7;Q8BH76;Q9EQ28	A0A140LHY7;A0A140LIW6;Q3THQ7;Q8BH76;Q9EQ28	Pold3	DNA polymerase delta subunit 3;Polymerase (DNA-directed), delta 3, accessory subunit (Fragment);DNA polymerase delta subunit 3;DNA polymerase delta subunit 3;DNA polymerase delta subunit 3	5405.23	4642.12	6408.81	8193.85	7454.37	7637.95	7086.17	4170.09	6544.05
A0A140LI56;A0A140LIM2;A0A140LJF3;Q9DCH6	A0A140LI56;A0A140LIM2;A0A140LJF3;Q9DCH6	Zfand6	Zinc finger, AN1-type domain 6 (Fragment);Zinc finger, AN1-type domain 6 (Fragment);Zinc finger, AN1-type domain 6 (Fragment);AN1-type zinc finger protein 6	381229	323793	394430	201843	538328	518751	485376	437030	443010
A0A140LI84;Q8BVQ5	A0A140LI84;Q8BVQ5	Ppme1	protein phosphatase methylesterase-1 (Fragment);Protein phosphatase methylesterase 1	61.0976
A0A140LI86;E9Q9Z4;Q3UL40;Q9JJG0	A0A140LI86;E9Q9Z4;Q3UL40;Q9JJG0	Tacc2	Transforming, acidic coiled-coil containing protein 2;Transforming, acidic coiled-coil containing protein 2;Transforming acidic coiled-coil-containing protein C-terminal domain-containing protein (Fragment);Transforming acidic coiled-coil-containing protein 2	23224.3	22179.1	18186.2	22086.6	20173.4	22972.9	20084.3	20042.8	21177.4
A0A140LIF8;U5NJF3	A0A140LIF8;U5NJF3	Irgm2	Immunity-related GTPase family M protein 2;Immunity-related GTPase member m2	3527.38	6721.48	8319.28	2621.59	1080.25	1414.46	7021.51	9121.84	4209.91
A0A140LIS5;Q3UL36	A0A140LIS5;Q3UL36	Arglu1	Arginine and glutamate rich 1 (Fragment);Arginine and glutamate-rich protein 1	54890.1	46438.7	38041.7	19277.2	33410.3	42583.6	20965.1	66244	39702.9
A0A140LIT9;Q7TSJ2	A0A140LIT9;Q7TSJ2	Map6	Microtubule-associated protein 6	15528.8	3789.44	4624.92	8003.06	9539.5	7905.42	14520.5	12653.9	14798
A0A140LIZ7;Q8CAF4	A0A140LIZ7;Q8CAF4	Nhsl1	NHS-like 1;NHS-like protein 1	2491.64	1031.14	1810.13	4898.25	4305.69	3474.31	2093.74	3100.03	1754.69
A0A140LJ04;E9Q5W5;Q5SSH7	A0A140LJ04;E9Q5W5;Q5SSH7	Zzef1	Zinc finger, ZZ-type with EF hand domain 1;Zinc finger, ZZ-type with EF hand domain 1;Zinc finger ZZ-type and EF-hand domain-containing protein 1	14935.5	10522.9	8896.64	10495.6	9169.48	11285.6	12210.1	11699.7	8672.65
A0A140LJ35;Q8BIF9	A0A140LJ35;Q8BIF9	Zfp787;Znf787	Zinc finger protein 787 (Fragment);Zinc finger protein 787	13377.4	16673.9	12840.3		5579.15	1521.56		49.4026
A0A140LJ44;Q3URA7;Q7TSH4	A0A140LJ44;Q3URA7;Q7TSH4	Ccp110	Centriolar coiled coil protein 110 (Fragment);Centriolar coiled-coil protein of 110 kDa (Fragment);Centriolar coiled-coil protein of 110 kDa				1670.88	1773.44
A0A140LJB5	A0A140LJB5	Nap1l4	Nucleosome assembly protein 1-like 4 (Fragment)	4850.05	3444.81		4289.46	3447.51	3409.26	5977.39	4896.07
A0A140LJH7;D3YY31;D3YZA9;Q05D10;Q3TQJ3;Q3V1K7;Q4VA99;Q80VV4;Q8BXB6	A0A140LJH7;D3YY31;D3YZA9;Q05D10;Q3TQJ3;Q3V1K7;Q4VA99;Q80VV4;Q8BXB6	Slco2b1	Solute carrier organic anion transporter family, member 2b1 (Fragment);Solute carrier organic anion transporter family, member 2b1 (Fragment);Solute carrier organic anion transporter family, member 2b1 (Fragment);Solute carrier organic anion transporter family member;Solute carrier organic anion transporter family member;Solute carrier organic anion transporter family member;Solute carrier organi…	7825.3	5053.81	8455	865.592	2142.1	974.455	2232.05	1628.99	2785.23
A0A140LJJ5;E9Q394	A0A140LJJ5;E9Q394	Akap13	A kinase (PRKA) anchor protein 13;A-kinase anchor protein 13	9582.45	10377.8	10113.4	15218.9	17922.6	18027.5	12593.5	13197.3	11643
A0A140T8I9;A0A1S6GWJ7;E9Q3L2	A0A140T8I9;A0A1S6GWJ7;E9Q3L2	Pi4ka	1-phosphatidylinositol 4-kinase;1-phosphatidylinositol 4-kinase;Phosphatidylinositol 4-kinase alpha	7677.47	5256.41	10207.2	9270.63	10454	9052.49	9139.75	7964.39	11002.2
A0A140T8Q9;B2RPY5	A0A140T8Q9;B2RPY5	Gpr161	G protein-coupled receptor 161;G-protein coupled receptor 161		1725.4		2219.85	3415.32	2340.51		2469.61	941.452
A0A140T8R5;Q6IE82	A0A140T8R5;Q6IE82	Jade3	Jade family PHD finger 3;Protein Jade-3	10132.5	8137.33	7055.35	10908.4	12478.7	11701	10312.2	11943.3	12203.5
A0A140T8R7;Q8CFE3	A0A140T8R7;Q8CFE3	Rcor1	REST corepressor 1	32882.6	28787.5	33300.1	17066.6	20821.9	17336	13355.1	15209.1	15347.3
A0A158RFU0;Q6KAR2;Q78T81	A0A158RFU0;Q6KAR2;Q78T81	Eeig1	Family with sequence similarity 102, member A;MFLJ00179 protein (Fragment);Early estrogen-induced gene 1 protein	3509.71	1869.19	2798.68		3510.83	3489.92	6507.68	4773.42
A0A158RFV1;Q9CW46	A0A158RFV1;Q9CW46	Raver1	Ribonucleoprotein, PTB-binding 1;Ribonucleoprotein PTB-binding 1	64661.1	71183.9	61328.1	30670.8	31573.1	36158.3	11057.9	13161.5	15814.1
A0A158SIT8;Q9DBD5	A0A158SIT8;Q9DBD5	Pelp1	Proline-, glutamic acid- and leucine-rich protein 1;Proline-, glutamic acid- and leucine-rich protein 1	146091	155011	142897	156738	178769	165524	156639	166199	188069
A0A165ELP6;A0A1B0GS13;A0A1B0GT81;A0A1B0GTA4;Q07813;Q3TXJ7;Q544Z6;Q8K3J2	A0A165ELP6;A0A1B0GS13;A0A1B0GT81;A0A1B0GTA4;Q07813;Q3TXJ7;Q544Z6;Q8K3J2	Bax	BCL2 associated-X protein (Fragment);BCL2-associated X protein (Fragment);BCL2-associated X protein;BCL2-associated X protein (Fragment);Apoptosis regulator BAX;Bcl-2 Bcl-2 homology region 1-3 domain-containing protein;Bcl-2 Bcl-2 homology region 1-3 domain-containing protein;Bcl2-associated X protein kappa isoform	5292.11	3528.69	3156.13	1877.49	1486.19	1672.71	1380.1	1477.55	999.24
A0A171EBL2;A0A8I4P9C4;E9Q555	A0A171EBL2;A0A8I4P9C4;E9Q555	Rnf213	Ring finger protein 213;Ring finger protein 213;E3 ubiquitin-protein ligase RNF213
A0A1B0GQU8;P35980;Q0QEW9;Q58EW0;Q642K1	A0A1B0GQU8;P35980;Q0QEW9;Q58EW0;Q642K1	Rpl18	Ribosomal protein L18;Large ribosomal subunit protein eL18;Ribosomal protein L18 (Fragment);Rpl18 protein;Ribosomal protein L18	2693.59	2805.22	2373.84	2622.53	2402.12	2847.04	2463.87	1932.42	2589.35
A0A1B0GQW2;A0A991EQU8	A0A1B0GQW2;A0A991EQU8	Cyth2	Cytohesin 2 (Fragment);Cytohesin 2	11279.6		4766.34	2958.43	4760.57	4385.82	3614.58		2119.23
A0A1B0GQZ1;A0A1B0GSZ9;O35972	A0A1B0GQZ1;A0A1B0GSZ9;O35972	Mrpl23	Mitochondrial ribosomal protein L23;Mitochondrial ribosomal protein L23;Large ribosomal subunit protein uL23m	4266.37	2974.36	4024.92	1668.97	444.036		2232.36	1577.51	1567.63
A0A1B0GR06;A0A1B0GRM0;Q64700;Q8VCD1	A0A1B0GR06;A0A1B0GRM0;Q64700;Q8VCD1	Rbl2	RB transcriptional corepressor like 2;RB transcriptional corepressor like 2;Retinoblastoma-like protein 2;Retinoblastoma-like 2	12588.1	12704.6	11545.4	6800.09	6354.59	6255.42	6129.45	6297.29	6513.42
A0A1B0GR11;Q93092	A0A1B0GR11;Q93092	Taldo1	Transaldolase	647393	655336	613439	529173	601125	488492	597737	522617	475354
A0A1B0GR17;Q9JKQ4	A0A1B0GR17;Q9JKQ4	Irx5	Iroquois homeobox 5;Iroquois-class homeodomain protein IRX-5	17499.4	15066.1	10607	15267	15837	14175.3	8146.87	7199.03	8935.25
A0A1B0GR18;Q3TYF8;Q8VI63	A0A1B0GR18;Q3TYF8;Q8VI63	Mob2	MOB kinase activator 2	1036.4	2498.48	1245.54	711.019	1181.66	1315.85	3168.86	3546.23	790.471
A0A1B0GR19;A0A1B0GR86;Q8BH97	A0A1B0GR19;A0A1B0GR86;Q8BH97	Rcn3	Reticulocalbin 3, EF-hand calcium binding domain (Fragment);Reticulocalbin 3, EF-hand calcium binding domain (Fragment);Reticulocalbin-3	22625.2	16454.6	18084.1	5072.8	3693.1	4783.84	6669.55	5205.18	3952.73
A0A1B0GR22;A0A1B0GSC3;A0A1B0GSM9;D3Z3Y7;Q8VC98	A0A1B0GR22;A0A1B0GSC3;A0A1B0GSM9;D3Z3Y7;Q8VC98	Plekha4	Pleckstrin homology domain containing, family A (phosphoinositide binding specific) member 4;Pleckstrin homology domain containing, family A (phosphoinositide binding specific) member 4;Pleckstrin homology domain containing, family A (phosphoinositide binding specific) member 4;Pleckstrin homology domain containing, family A (phosphoinositide binding specific) member 4;Pleckstrin homology domain-…	3088	1227.67	1314.61	478.856	2175.36	1081.86	2547.27	4640.26	3094.86
A0A1B0GR85	A0A1B0GR85	2900026A02Rik	RIKEN cDNA 2900026A02 gene	56667	50086.4	51498.1	50168.2	43125	46426.4	37571.9	43531.8	41478.5
A0A1B0GRG1;A0A1B0GRT5;P10833;P62071;Q3U1N3	A0A1B0GRG1;A0A1B0GRT5;P10833;P62071;Q3U1N3	Rras;Rras2;Rras;Rras2;Rras	Related RAS viral (r-ras) oncogene (Fragment);Related RAS viral (r-ras) oncogene 2;Ras-related protein R-Ras;Ras-related protein R-Ras2;Harvey rat sarcoma oncogene, subgroup R	1269.76	412.378	699.927
A0A1B0GRG8;B2RXY7;P48758	A0A1B0GRG8;B2RXY7;P48758	Gm5678;Cbr1;Cbr1	Carbonyl reductase (NADPH);Carbonyl reductase (NADPH);Carbonyl reductase [NADPH] 1	673.514	625.778		215.172	606.528		616.001	322.63
A0A1B0GRJ0;E9Q8L9	A0A1B0GRJ0;E9Q8L9	Rab11fip1	RAB11 family interacting protein 1 (class I)	3032.65	4785.72	6434.33	20324.8	16795.2	18476.9	7792.05	9026.34	9853.12
A0A1B0GRP7;Q3UYN1;Q544R1;Q9Z2Y8	A0A1B0GRP7;Q3UYN1;Q544R1;Q9Z2Y8	Plpbp	Pyridoxal phosphate binding protein (Fragment);Pyridoxal phosphate homeostasis protein;Pyridoxal phosphate homeostasis protein;Pyridoxal phosphate homeostasis protein	2112.7	2060.39	2212.45	2756.12	2255.85	2190.29	4487.17	5528.27	3468.5
A0A1B0GRR3;P62281;Q3UC02;Q9DB79	A0A1B0GRR3;P62281;Q3UC02;Q9DB79	Rps11	Ribosomal protein S11;Small ribosomal subunit protein uS17;40S ribosomal protein S11;40S ribosomal protein S11	3036.03	3607.76	2345.69	3491.95	3777.72	3905.9	4760.07	5426.92	2403.37
A0A1B0GRU3;E9Q8K8;Q6ZPZ3	A0A1B0GRU3;E9Q8K8;Q6ZPZ3	Zc3h4	Zinc finger CCCH-type containing 4;Zinc finger CCCH-type containing 4;Zinc finger CCCH domain-containing protein 4	31379.7	24941.9	31484.8	25953.5	28535	25565.1	26320.8	19281.4	17059.1
A0A1B0GRU8;A0A6Q6PUT5;Q9R1C7	A0A1B0GRU8;A0A6Q6PUT5;Q9R1C7	Prpf40a	Pre-mRNA processing factor 40A;Pre-mRNA processing factor 40A (Fragment);Pre-mRNA-processing factor 40 homolog A	6726.49	10303.9	7692.3	4708.62	4275.86	4463.41	3413.43	2934.76	2212.77
A0A1B0GRX1;P70677	A0A1B0GRX1;P70677	Casp3	Caspase 3;Caspase-3	412.062			334.483	579.149
A0A1B0GRX5;Q3U4B1;Q99LZ8	A0A1B0GRX5;Q3U4B1;Q99LZ8	Ssbp4	Single stranded DNA binding protein 4	23081.8	20328.2	18689.4	18521.1	21662.5	20001.6	23840	19472.3	18945.2
A0A1B0GRY8	A0A1B0GRY8	Tnni2	Troponin I, skeletal, fast 2 (Fragment)	15000.4	15622.8	13579.5	3355.87	2306.22	3998.85	9195.2	6949.78	7009.64
A0A1B0GRZ5;Q3TYJ5;Q80V49;Q8BUW3;Q9Z1T5	A0A1B0GRZ5;Q3TYJ5;Q80V49;Q8BUW3;Q9Z1T5	Deaf1	DEAF1, transcription factor;SAND domain-containing protein;Deaf1 protein;SAND domain-containing protein;Deformed epidermal autoregulatory factor 1 homolog	11317.7	9751.17	10235.8	10096	10649.4	8617.01	10212.4	8223.95	10265.7
A0A1B0GS41	A0A1B0GS41	Gab1	Growth factor receptor bound protein 2-associated protein 1	40573.1	58213.8	55689	53466.6	57838.9	57895.4	66134.7	62022.9	57977.7
A0A1B0GS49;Q7TN37	A0A1B0GS49;Q7TN37	Trpm4	Transient receptor potential cation channel, subfamily M, member 4;Transient receptor potential cation channel subfamily M member 4
A0A1B0GS58;Q9CQM9	A0A1B0GS58;Q9CQM9	Glrx3	Glutaredoxin 3;Glutaredoxin-3	6669.92	3904.25	3221.53	1303.64	2484.51	655.904	1300.84	1162.75	1102.04
A0A1B0GS91;Q8K4L2;Q8K4L3	A0A1B0GS91;Q8K4L2;Q8K4L3	Svil	Supervillin;Archvillin;Supervillin	22805.5	20332.8	22739.7	16025.7	15656	17111.3	16723.7	15527.7	15457.7
A0A1B0GSI7;P02463	A0A1B0GSI7;P02463	Col4a1	Collagen, type IV, alpha 1;Collagen alpha-1(IV) chain		825.049		4913.71	4601.39	5592.39	1179.34
A0A1B0GSK0;Q61559;Q6PKB0	A0A1B0GSK0;Q61559;Q6PKB0	Fcgrt	Fc fragment of IgG receptor and transporter (Fragment);IgG receptor FcRn large subunit p51;Fc fragment of IgG receptor and transporter			2821.39
A0A1B0GSK1;Q99K23	A0A1B0GSK1;Q99K23	Ufsp2	UFM1-specific peptidase 2;Ufm1-specific protease 2	6812.53	4059.75	5364.6		891.185		2149.95	1604.11	2107.1
A0A1B0GSX0;P06151;Q3TI99;Q3UDU4;Q564E2	A0A1B0GSX0;P06151;Q3TI99;Q3UDU4;Q564E2	Ldha	L-lactate dehydrogenase;L-lactate dehydrogenase A chain;L-lactate dehydrogenase;L-lactate dehydrogenase;L-lactate dehydrogenase	27017.9	28433.4	28014.8	6086.88	6714.46	5492.39	12613.1	13876.8	12714.4
A0A1B0GSX6	A0A1B0GSX6	Pdlim3	PDZ and LIM domain 3	23425.8	20859.7	21165.4	10057.2	12455.5	11385.3	18095.5	16921.9	18073.3
A0A1B0GSX7;Q6PFD9	A0A1B0GSX7;Q6PFD9	Nup98	Nuclear pore complex protein Nup98-Nup96	125492	104973	66840.9	40792	43635.1	44506.6	21730.3	25008.1	32344.4
A0A1B0GT12;B4YDY0;P58390;Q80X11;Q8C7F3;Q8CAD4	A0A1B0GT12;B4YDY0;P58390;Q80X11;Q8C7F3;Q8CAD4	Kcnn2;Kcnn2;Kcnn2;Kcnn2;Kcnn2;	Potassium intermediate/small conductance calcium-activated channel, subfamily N, member 2;Potassium intermediate/small conductance calcium-activated channel, subfamily N, member 2;Small conductance calcium-activated potassium channel protein 2;Small conductance calcium-activated potassium channel SK2 splice variant;Calmodulin-binding domain-containing protein;Potassium channel domain-containing p…	18574.7		14298.3	57635.8	58748.7	57872.1	54571.8	53620.9	44690.1
A0A1B0GT24	A0A1B0GT24	Pfn5	Profilin	23787.5				6717.64
A0A1B0GT26;O55003	A0A1B0GT26;O55003	Bnip3	BCL2/adenovirus E1B interacting protein 3;BCL2/adenovirus E1B 19 kDa protein-interacting protein 3	88946.4	86880.2	88633.2	69031.4	66037	67118.8	76926.6	88350.6	88559.7
A0A1B0GT92;Q9Z1E4	A0A1B0GT92;Q9Z1E4	Gys1	Glycogen [starch] synthase;Glycogen [starch] synthase, muscle	168671	190308	154886	100771	97774.7	95804.3	94624.5	85416.2	99892.6
A0A1B0GX27;O35855;O88374;Q3ULU3	A0A1B0GX27;O35855;O88374;Q3ULU3	Bcat2	Branched-chain-amino-acid aminotransferase;Branched-chain-amino-acid aminotransferase, mitochondrial;Branched-chain-amino-acid aminotransferase;Branched-chain-amino-acid aminotransferase			1309.22		3215.91		761.166		446.548
A0A1B0GXK7;A5A9W3;A5A9W4;A5AA27;F6UUE3;Q0VGT2;Q0VGV1	A0A1B0GXK7;A5A9W3;A5A9W4;A5AA27;F6UUE3;Q0VGT2;Q0VGV1	Gli2	GLI-Kruppel family member GLI2 (Fragment);GLI-Kruppel family member (Fragment);GLI-Kruppel family member (Fragment);GLI-Kruppel family member (Fragment);GLI-Kruppel family member GLI2 (Fragment);Zinc finger protein GLI2;Gli2 protein	748.178		1159.06	2405.77	2926.85	2336.72	2933.84		2182.81
A0A1C7CYU3;Q02819;Q8BRD3	A0A1C7CYU3;Q02819;Q8BRD3	Nucb1	Nucleobindin 1;Nucleobindin-1;EF-hand domain-containing protein	42458.4	32870.4	29768.4	16124.9	19987.4	18728.9	15404	18788.8	19891.1
A0A1C7CYV0;B1AX58;Q3UJG9;Q99K51	A0A1C7CYV0;B1AX58;Q3UJG9;Q99K51	Pls3	Plastin 3 (T-isoform) (Fragment);Plastin 3 (T-isoform);Plastin-3;Plastin-3	30175.7	30441.3	47265.9	20322.9	22014.5	16462	14921.1	14153.1	14204.9
A0A1C7ZMZ5;P46412	A0A1C7ZMZ5;P46412	Gpx3	Glutathione peroxidase (Fragment);Glutathione peroxidase 3	433.966	668.971	2867.22	510.619		776.223	95.4054	516.89	161597
A0A1D5RLA2;A0A1D5RLU6;A0A1D5RM77;B2RS36;Q5EE38	A0A1D5RLA2;A0A1D5RLU6;A0A1D5RM77;B2RS36;Q5EE38	Acd	Adrenocortical dysplasia;Adrenocortical dysplasia;Adrenocortical dysplasia;Adrenocortical dysplasia;Adrenocortical dysplasia protein	1454.84		849.721	754.771		686.233	534.805	2156.14	721.794
A0A1D5RLC6;A0A1D5RME8;Q05CM2;Q3TT57;Q4VAB1;Q91VW5	A0A1D5RLC6;A0A1D5RME8;Q05CM2;Q3TT57;Q4VAB1;Q91VW5	Golga4	Golgi autoantigen, golgin subfamily a, 4 (Fragment);Golgi autoantigen, golgin subfamily a, 4 (Fragment);Golga4 protein (Fragment);Golgin subfamily A member 4 (Fragment);Golga4 protein (Fragment);Golgin subfamily A member 4	3574.04	3394.71	2605.94	13268.1	8761.37	11566.6	3186.37	2932.97	3935.52
A0A1D5RLD4;A0A1D5RLM9;A0A1D5RML8;P97760;Q3UUX3;Q9DB22	A0A1D5RLD4;A0A1D5RLM9;A0A1D5RML8;P97760;Q3UUX3;Q9DB22	Polr2c;Polr2c;Polr2c;Polr2c;Polr2c;	Polymerase (RNA) II (DNA directed) polypeptide C (Fragment);Polymerase (RNA) II (DNA directed) polypeptide C (Fragment);Polymerase (RNA) II (DNA directed) polypeptide C;DNA-directed RNA polymerase II subunit RPB3;DNA-directed RNA polymerase RpoA/D/Rpb3-type domain-containing protein;DNA-directed RNA polymerase RpoA/D/Rpb3-type domain-containing protein	984.74	784.71		2324.49	2846.56	2709.14	4413.81	1954.36	1216.28
A0A1D5RLD7;A0A1D5RLF2;A0A1D5RLI3;A0A1D5RLJ3;A0A1D5RLT4;A0A1D5RLU2;A0A1D5RLW0;A0A1D5RLX7;A0A1D5RLY1;A0A1D5RM30;Q91WE2	A0A1D5RLD7;A0A1D5RLF2;A0A1D5RLI3;A0A1D5RLJ3;A0A1D5RLT4;A0A1D5RLU2;A0A1D5RLW0;A0A1D5RLX7;A0A1D5RLY1;A0A1D5RM30;Q91WE2	Psme3ip1	Proteasome activator subunit 3 interacting protein 1 (Fragment);Proteasome activator subunit 3 interacting protein 1 (Fragment);Proteasome activator subunit 3 interacting protein 1 (Fragment);Proteasome activator subunit 3 interacting protein 1 (Fragment);Proteasome activator subunit 3 interacting protein 1 (Fragment);Proteasome activator subunit 3 interacting protein 1 (Fragment);Proteasome acti…	1028.41	1045	2140.06	831.23		1608.04		1248.32	1895.78
A0A1D5RLF1;Q8BGH4	A0A1D5RLF1;Q8BGH4	Reep1	Receptor expression-enhancing protein;Receptor expression-enhancing protein 1	2632.87	4587.78	3604.4	2713.55	3749.97	3489.54	13393.3	6367.27	3348.33
A0A1D5RLG3;Q3UYK8;Q80UJ7	A0A1D5RLG3;Q3UYK8;Q80UJ7	Rab3gap1	Rab3 GTPase-activating protein catalytic subunit	35055.9	32316.9	33575.6	15634	17757.1	19738.9	22376.2	21901.9	24871.1
A0A1D5RLJ8;Q8C0M0	A0A1D5RLJ8;Q8C0M0	Wdr59	WD repeat domain 59;GATOR complex protein WDR59	9009.13	5741.29	6467.93	8147.01	9300.22	9394.09	5512.4	5695.49	9013.58
A0A1D5RLK2;A0A1D5RMH7;E9PUC5;F6Z9E6;Q2PFD7	A0A1D5RLK2;A0A1D5RMH7;E9PUC5;F6Z9E6;Q2PFD7	Psd3	Pleckstrin and Sec7 domain containing 3;Pleckstrin and Sec7 domain containing 3;Pleckstrin and Sec7 domain containing 3;Pleckstrin and Sec7 domain containing 3;PH and SEC7 domain-containing protein 3	11714.6	9072.19	8111.6	4061.01	4894.54	5237.69	5991.76	8401.13	5782.38
A0A1D5RLK7;E9QNK5;K9J9G1;P35347;Q0VGH2;Q3UQP0;Q3ZAT0;Q60748	A0A1D5RLK7;E9QNK5;K9J9G1;P35347;Q0VGH2;Q3UQP0;Q3ZAT0;Q60748	Crhr2;Crhr2;Crhr1;Crhr1;Crhr1;Crhr2;Crhr1;Crhr2	Corticotropin releasing hormone receptor 2;Corticotropin releasing hormone receptor 2;CRH receptor subtype-1 isoform-3;Corticotropin-releasing factor receptor 1;Crhr1 protein;Corticotropin releasing hormone receptor 2;Corticotropin-releasing factor receptor 1;Corticotropin-releasing factor receptor 2	18440.9	17733.6	15559.3	10328	9403.83	9434.85	3506.97	6116.06	4340.87
A0A1D5RLL3;Q8BG67	A0A1D5RLL3;Q8BG67	Efr3a	EFR3 homolog A;Protein EFR3 homolog A	3848.1	5337.39	2763.39	2268.76	2077.37	2987.58	4788.35	665.424	2687.49
A0A1D5RLL4;E9PWT1;E9PZA7;E9QLK7;F7CGG2;Q3UH32	A0A1D5RLL4;E9PWT1;E9PZA7;E9QLK7;F7CGG2;Q3UH32	Trrap	Transformation/transcription domain-associated protein;Transformation/transcription domain-associated protein;Transformation/transcription domain-associated protein;Transformation/transcription domain-associated protein;Transformation/transcription domain-associated protein (Fragment);Transformation/transcription domain-associated protein (Fragment)	13905.6	13188.5	23029.9	6844.85	5579.28	4944.77	11457.8	8157.21	11596.5
A0A1D5RLN0;Q0VH02;Q3UMM4	A0A1D5RLN0;Q0VH02;Q3UMM4	Cdk10	Cyclin-dependent kinase 10;Cyclin-dependent kinase (CDC2-like) 10;Cyclin-dependent kinase 10	6004.05	7322.67	4419.35	5186.82	4442.52	3321.71	9239.37	10053.9	10033.7
A0A1D5RLQ9;B2RXX8;D3YYN8;E9PVY0;F6Q5A5;F6S5Z6;H7BX44;Q3UU96	A0A1D5RLQ9;B2RXX8;D3YYN8;E9PVY0;F6Q5A5;F6S5Z6;H7BX44;Q3UU96	Cdc42bpa	non-specific serine/threonine protein kinase;non-specific serine/threonine protein kinase;non-specific serine/threonine protein kinase;non-specific serine/threonine protein kinase;non-specific serine/threonine protein kinase (Fragment);non-specific serine/threonine protein kinase (Fragment);non-specific serine/threonine protein kinase;Serine/threonine-protein kinase MRCK alpha	12892	11380.5	16489.7	9143.93	7660.09	8414.18	3514.39	4146.31	4445.9
A0A1D5RLS1;Q60902	A0A1D5RLS1;Q60902	Eps15l1	Epidermal growth factor receptor pathway substrate 15-like 1;Epidermal growth factor receptor substrate 15-like 1	40506.8	43588.8	34034.7	18960.5	22662.1	26489.5	24360.1	29746.9	34295.8
A0A1D5RLS2;A0A1D5RM23;Q9CQF3;Q9CZQ0	A0A1D5RLS2;A0A1D5RM23;Q9CQF3;Q9CZQ0	Nudt21	Cleavage and polyadenylation specificity factor subunit 5 (Fragment);Cleavage and polyadenylation specificity factor subunit 5;Cleavage and polyadenylation specificity factor subunit 5;Cleavage and polyadenylation specificity factor subunit 5	621.179	718.365	212.372					653.528
A0A1D5RLV0;Q8C1D8	A0A1D5RLV0;Q8C1D8	Iws1	IWS1, SUPT6 interacting protein;Protein IWS1 homolog	59470.9	56649.8	53993.9	50462.9	51696.1	51005.7	31299.8	25498.8	30804.1
A0A1D5RLV1;Q3UH12	A0A1D5RLV1;Q3UH12	Epb41	Erythrocyte membrane protein band 4.1 (Fragment);FERM domain-containing protein (Fragment)	1482.17		1531.33	2872.76	1166.39	1299.52		1151.88
A0A1D5RLW4;E9PWZ6;E9PZW8	A0A1D5RLW4;E9PWZ6;E9PZW8	Myo9b	Myosin IXb	18473.5	16368.1	17290.2	16798.8	17781	16801.8	14825.9	17173.8	15381.3
A0A1D5RLW5;A0A1D5RM85;P62717;Q3THJ0	A0A1D5RLW5;A0A1D5RM85;P62717;Q3THJ0	Rpl18a	60S ribosomal protein L18a;Ribosomal protein L18A (Fragment);Large ribosomal subunit protein eL20;60S ribosomal protein L18a	2776.48	3235.49	7105.78		4021.13	20847.7	65947.8	5625.98	6845.07
A0A1D5RLY2;Q80WQ2;Q8C907;Q8CCX6	A0A1D5RLY2;Q80WQ2;Q8C907;Q8CCX6	Vac14	Vac14 homolog (S. cerevisiae);Protein VAC14 homolog;Protein VAC14 homolog;Protein VAC14 homolog	3767.78	5139.88	2853.32	7294.24	6985.95	491.128	958.096	578.628
A0A1D5RLY5;A0A1D5RMK7;G8CZ46;G8CZ47;G8CZ49;G8CZ50;G8CZ53;G8CZ56;G8CZ57;G8CZ59;G8CZ60;G8CZ61;G8CZ62;G8CZ65;G8CZ66;G8CZ67;G8CZ71;G8CZ74;G8CZ76;G8CZ77;G8CZ90;Q3UFM3;Q8CB14	A0A1D5RLY5;A0A1D5RMK7;G8CZ46;G8CZ47;G8CZ49;G8CZ50;G8CZ53;G8CZ56;G8CZ57;G8CZ59;G8CZ60;G8CZ61;G8CZ62;G8CZ65;G8CZ66;G8CZ67;G8CZ71;G8CZ74;G8CZ76;G8CZ77;G8CZ90;Q3UFM3;Q8CB14	4930503L19Rik;4930503L19Rik;4930503L19Rik;4930503L19Rik;4930503L19Rik;4930503L19Rik;4930503L19Rik;4930503L19Rik;4930503L19Rik;4930503L19Rik;4930503L19Rik;4930503L19Rik;4930503L19Rik;4930503L19Rik;4930503L19Rik;4930503L19Rik;4930503L19Rik;4930503L19Rik;4930503L19Rik;4930503L19Rik;4930503L19Rik;4930503L19Rik;Las2	RIKEN cDNA 4930503L19 gene;RIKEN cDNA 4930503L19 gene;4930503L19Rik;4930503L19Rik;4930503L19Rik;4930503L19Rik;4930503L19Rik;4930503L19Rik isoform 1 transcript variant 1;4930503L19Rik isoform 1 transcript variant 1;4930503L19Rik isoform 1 transcript variant 1;4930503L19Rik isoform 2 transcript variant 4;4930503L19Rik isoform 2 transcript variant 4;4930503L19Rik isoform 2 transcript variant 4;49305…	914.518	2279.99	546.329				3555.32	2710.49	3231.61
A0A1D5RLY6;B2RWW1;Q8C052	A0A1D5RLY6;B2RWW1;Q8C052	Map1s	Microtubule-associated protein 1S	11159.6	8846.88	10440.6	10310.1	11776.6	11677.1	14551.3	16872.3	16058.5
A0A1D5RLY9;B9EK76;Q80TE4	A0A1D5RLY9;B9EK76;Q80TE4	Sipa1l2	Signal-induced proliferation-associated 1 like 2;Signal-induced proliferation-associated 1 like 2;Signal-induced proliferation-associated 1-like protein 2	3856.26	8289.83	3326.24	8706.6	6361.19	8134.47	6644.39	5400.41	6892.63
A0A1D5RLZ6;Q4KL41;Q9DCC8	A0A1D5RLZ6;Q4KL41;Q9DCC8	Tomm20	Translocase of outer mitochondrial membrane 20;Translocase of outer mitochondrial membrane 20 homolog (Yeast);Mitochondrial import receptor subunit TOM20 homolog	7421.24	6506.18	6688.06	9786.77	6912.04	11125.6	22288.5	14228.8	14373.6
A0A1D5RM17;Q8BTG7	A0A1D5RM17;Q8BTG7	Ndrg4	N-myc downstream regulated gene 4 (Fragment);Protein NDRG4	11449.9	8533.28	9063.97	4175.3	4355.76	5952.54
A0A1D5RM43;A0A1D5RMA4;A0A1D5RMI7;Q8BGK6	A0A1D5RM43;A0A1D5RMA4;A0A1D5RMI7;Q8BGK6	Slc7a6	Solute carrier family 7 (cationic amino acid transporter, y+ system), member 6 (Fragment);Solute carrier family 7 (cationic amino acid transporter, y+ system), member 6;Solute carrier family 7 (cationic amino acid transporter, y+ system), member 6 (Fragment);Y+L amino acid transporter 2		1658.99	614.443	7529.08	3412.04	6203.74	3131.68	4034.75	3218.63
A0A1D5RM83;E9PUA3;Q8R0S2	A0A1D5RM83;E9PUA3;Q8R0S2	Iqsec1	IQ motif and Sec7 domain 1;IQ motif and Sec7 domain 1;IQ motif and SEC7 domain-containing protein 1	8595.12	8934.05	6473.6	7937.77	7419.91	7379.23	6453.52	4034.19	5172.27
A0A1D5RM92;I3RSH5;Q3UJU3;Q9DBH0	A0A1D5RM92;I3RSH5;Q3UJU3;Q9DBH0	Wwp2	E3 ubiquitin-protein ligase;E3 ubiquitin-protein ligase;E3 ubiquitin-protein ligase;NEDD4-like E3 ubiquitin-protein ligase WWP2	4221.16	3491.6		5023.53	3444.06	3509.29	2393.81	2360.76
A0A1D5RM94;A0A1D5RMC1;Q6PDL0	A0A1D5RM94;A0A1D5RMC1;Q6PDL0	Dync1li2	Dynein light intermediate chain;Dynein light intermediate chain (Fragment);Cytoplasmic dynein 1 light intermediate chain 2	1892.49	952.537	1214.66	3242.95	2411.95	2481.75	679.68	4560.15	946.423
A0A1D5RM97;Q3U214	A0A1D5RM97;Q3U214	Mast3	non-specific serine/threonine protein kinase;Microtubule-associated serine/threonine-protein kinase 3	2482.05	1792.24	2104.95	3795.58	3552.92	2826.24	2156.52	2591.99	2526.8
A0A1D5RMD4;B1AVY7;E7FLY0	A0A1D5RMD4;B1AVY7;E7FLY0	Kif16b	Kinesin family member 16B;Kinesin-like protein KIF16B;Kinesin family member 16B				8336.42	7762.28	10101.1		7266.08
A0A1D5RMD8;A0A1D5RMJ8;A0A1D5RML9;B2RXR3;B7ZWL1;Q6ZQ08	A0A1D5RMD8;A0A1D5RMJ8;A0A1D5RML9;B2RXR3;B7ZWL1;Q6ZQ08	Cnot1	CCR4-NOT transcription complex, subunit 1;CCR4-NOT transcription complex, subunit 1;CCR4-NOT transcription complex, subunit 1 (Fragment);Cnot1 protein;CCR4-NOT transcription complex, subunit 1;CCR4-NOT transcription complex subunit 1	1083.8	1145.45	737.488	1460.82	264.893	671.8	405.288	202.806
A0A1D5RMM1;B2RXS7;F8VPN7	A0A1D5RMM1;B2RXS7;F8VPN7	Dock9	Dedicator of cytokinesis 9;Dock9 protein;Dedicator of cytokinesis 9	32373	29198.8	35886.3	47032.3	42377.2	47876.8	82125.1	77125.5	74141.3
A0A1D5RMM8	A0A1D5RMM8	Pxn	Paxillin	21364.1	37074.7	23542.4	31437.5	49039.4	46628.6	19912.2	26659.6	31176.5
A0A1G5SJA5;G3X9V0;P97372;Q5SVP3	A0A1G5SJA5;G3X9V0;P97372;Q5SVP3	OTTMUSWSBG00059279;Psme2;Psme2;PSME2b	OTTMUSWSBP00075795;Proteasome (prosome, macropain) activator subunit 2 (PA28 beta);Proteasome activator complex subunit 2;PA28 beta subunit	66650.5	68240.3	49154.4	35257.4	43306	29055.3	12139.7	27073.1	24174
A0A1I7Q4G8;E9QMN5;Q8CHY6	A0A1I7Q4G8;E9QMN5;Q8CHY6	Gatad2a	GATA zinc finger domain containing 2A;GATA zinc finger domain containing 2A;Transcriptional repressor p66 alpha	23237.3	18585.2	17629.9	16238.9	18400.6	19300.9	21699	20759	19800
A0A1L1SQ12;A0A1L1SR42;Q3TFA9;Q9JHJ0	A0A1L1SQ12;A0A1L1SR42;Q3TFA9;Q9JHJ0	Tmod3	Tropomodulin 3;Tropomodulin 3 (Fragment);Tropomodulin-3;Tropomodulin-3	32427.8	29893.9	34724.3	5948.89	9446.47	6573.84	18970.5	19814.1	19219.4
A0A1L1SQ28;Q9JMA2	A0A1L1SQ28;Q9JMA2	Qtrt1	Queuine tRNA-ribosyltransferase catalytic subunit 1 (Fragment);Queuine tRNA-ribosyltransferase catalytic subunit 1	10659.6	6187.16	8522.14	8830.55	10108.5	10187.5	20691.3	16576.9	15357.8
A0A1L1SQ51;B2RY15;E9PUM4	A0A1L1SQ51;B2RY15;E9PUM4	Tln2	Talin 2;Tln2 protein;Talin 2	134779	101107	142308	53866	67282.6	39286.7	34900.2	41731.7	44342.6
A0A1L1SQ61	A0A1L1SQ61	Proser3	Proline and serine rich 3		1049.99	676.953		1189.43			953.382
A0A1L1SQ76;A0A1L1SQV7;A0A1L1SRD0;A0A1L1SSQ5;A0A1L1SVK0;Q61206;Q8BTA2	A0A1L1SQ76;A0A1L1SQV7;A0A1L1SRD0;A0A1L1SSQ5;A0A1L1SVK0;Q61206;Q8BTA2	Pafah1b2	Platelet-activating factor acetylhydrolase, isoform 1b, subunit 2 (Fragment);Platelet-activating factor acetylhydrolase, isoform 1b, subunit 2 (Fragment);Platelet-activating factor acetylhydrolase, isoform 1b, subunit 2 (Fragment);Platelet-activating factor acetylhydrolase, isoform 1b, subunit 2 (Fragment);Platelet-activating factor acetylhydrolase, isoform 1b, subunit 2 (Fragment);Platelet-activ…	5586.65	3887.29	4660.75	6393.22	8553.44	8908.49	9227.81	6634.59	11526.5
A0A1L1SQA8;P62852;Q58EA6	A0A1L1SQA8;P62852;Q58EA6	Rps25	40S ribosomal protein S25;Small ribosomal subunit protein eS25;40S ribosomal protein S25	6532.05	6751.54	5656.75	5698.21	4928.17	3870.1	4020.64	4912.45	3739.83
A0A1L1SQG7;E9PZQ0	A0A1L1SQG7;E9PZQ0	Ryr1	Ryanodine receptor 1, skeletal muscle;Ryanodine receptor 1	20882.3	18342.9	23251.4	6526.58	8400.63	7764.4	23333.4	23117.7	19949.6
A0A1L1SQN1;A0A1L1SSL7;Q8R0A2	A0A1L1SQN1;A0A1L1SSL7;Q8R0A2	Zbtb44	Zinc finger and BTB domain containing 44 (Fragment);Zinc finger and BTB domain containing 44;Zinc finger and BTB domain-containing protein 44	13951.7	10410.6	11856.3	9810.47	10032.8	10244.6	10893.2	11518.7	8861.28
A0A1L1SQR4	A0A1L1SQR4	Dock6	Dedicator of cytokinesis 6	3514.97	2725.69	1620.22	3866.17	3140.96	2707.37	1338.35	2881.2	2815.09
A0A1L1SQT5;A0A1L1SST3;A0A1L1STP6;A0A8Z1S2G3;O35492;Q3UWB8	A0A1L1SQT5;A0A1L1SST3;A0A1L1STP6;A0A8Z1S2G3;O35492;Q3UWB8	Clk3	CDC-like kinase 3;CDC-like kinase 3;CDC-like kinase 3 (Fragment);CDC-like kinase 3;Dual specificity protein kinase CLK3;Dual-specificity protein kinase CLK3	2941.04	2992.08	3698.02	1778.49	2916.53	2236.73	3682.62	3641.36	4784.7
A0A1L1SRA5;Q9DC33	A0A1L1SRA5;Q9DC33	Hmg20a	High mobility group 20A;High mobility group protein 20A	29686.1	39767.8	44208.3	22965.4	23864.6	24243.8	39951.4	45904	42041.6
A0A1L1SRL4;Q922P6;Q9WU63	A0A1L1SRL4;Q922P6;Q9WU63	Hebp2	Heme binding protein 2;Hebp2 protein;Heme-binding protein 2	400.314	17264.4	12780.7	605.611	2048.15	414.493			5649.06
A0A1L1SS09;Q8VCZ2	A0A1L1SS09;Q8VCZ2	Tmem45b	Transmembrane protein 45b;Transmembrane protein 45B	63550.9	50541.9	63476.3	60335.7	54721	38282.4	55309.4	57696.2	41406.1
A0A1L1SS16;D3Z623	A0A1L1SS16;D3Z623	9330159F19Rik	RIKEN cDNA 9330159F19 gene	8263.82	13988	11955.7	12810.8	14242.2	18878.5	18467	18416.5	20007.4
A0A1L1SS26;E9Q351	A0A1L1SS26;E9Q351	Ccr5	Chemokine (C-C motif) receptor 5 (Fragment);Chemokine (C-C motif) receptor 5						207.363
A0A1L1SS27;A0A1L1SUN1;P47915;Q5M8M8;W4VSN7	A0A1L1SS27;A0A1L1SUN1;P47915;Q5M8M8;W4VSN7	Rpl29;Rpl29;Rpl29;Rpl29;Gm3550	60S ribosomal protein L29 (Fragment);Ribosomal protein L29 (Fragment);Large ribosomal subunit protein eL29;60S ribosomal protein L29;60S ribosomal protein L29							0.503388	3.74535
A0A1L1SSC0;A0A668KLE1	A0A1L1SSC0;A0A668KLE1	Lrrfip2	Leucine rich repeat (in FLII) interacting protein 2	16380	12652.1	11512.2	9701.37	9411.11	9587.11	9790.53	11431.7	9297.08
A0A1L1SSG8;E0CXY1;E0CYY9;F6SG45;Q3UU92;Q8K0X8	A0A1L1SSG8;E0CXY1;E0CYY9;F6SG45;Q3UU92;Q8K0X8	Fez1	Fasciculation and elongation protein zeta 1 (zygin I) (Fragment);Fasciculation and elongation protein zeta 1 (zygin I) (Fragment);Fasciculation and elongation protein zeta 1 (zygin I) (Fragment);Fasciculation and elongation protein zeta 1 (zygin I) (Fragment);Fasciculation and elongation protein zeta-1 (Fragment);Fasciculation and elongation protein zeta-1					406.975	377.466
A0A1L1SSH9;P07214;Q3TXI6;Q5NCU4;Q5NCU5	A0A1L1SSH9;P07214;Q3TXI6;Q5NCU4;Q5NCU5	Sparc	SPARC	5699.38	5073.44	3667.56	2795.25	2627.94	1556.35	895.62	3603.13	1906.91
A0A1L1SSJ7;P23780;Q3TAW7;Q8C659;Q8C847;Q8K131;Q99KV2	A0A1L1SSJ7;P23780;Q3TAW7;Q8C659;Q8C847;Q8K131;Q99KV2	Glb1;Glb1;Glb1;;;Glb1;Glb1	Galactosidase, beta 1;Beta-galactosidase;Beta-galactosidase;Beta-galactosidase (Fragment);Beta-galactosidase;Beta-galactosidase;Beta-galactosidase (Fragment)	3875.38	3226.79	3822.61	1737.83	2149.88		463.038		1356.74
A0A1L1SSS4;B9EIW5;Q6DFV7	A0A1L1SSS4;B9EIW5;Q6DFV7	Ncoa7	Nuclear receptor coactivator 7;Ncoa7 protein;Nuclear receptor coactivator 7	18117.3	18161.9	17714	15486.1	14208.2	14047.6	10944.6	14096.8	13033.7
A0A1L1ST22;Q8BSE7	A0A1L1ST22;Q8BSE7	Clasp2	CLIP associating protein 2	4493.41	7019.78	6567.88	2303.01	1954.04	1521.2	5164.76	4015.04	2510.6
A0A1L1STC6	A0A1L1STC6	Syne1	Spectrin repeat containing, nuclear envelope 1	3589.3	5099.06	5694.63	4424.42	4790.86	6162.86	6230.39	3453.06	3358.56
A0A1L1STC8;A0A1L1SU53;Q9Z0P5	A0A1L1STC8;A0A1L1SU53;Q9Z0P5	Twf2	Twinfilin actin binding protein 2 (Fragment);Twinfilin actin binding protein 2 (Fragment);Twinfilin-2	5995.2	7839.39	6123.79		2096.11	2073.51	3775.86	2805.01	2556.53
A0A1L1STE4;Q45VK5;Q45VK6;Q9Z1X4	A0A1L1STE4;Q45VK5;Q45VK6;Q9Z1X4	Ilf3	Interleukin enhancer binding factor 3;Interleukin enhancer binding factor 3;Nuclear factor 90;Interleukin enhancer-binding factor 3	3863.69	2363.06	3926.73	3800.28	4425.48	5201.68	3029.43	3176.15	3125.52
A0A1L1STE6;Q9D6R2	A0A1L1STE6;Q9D6R2	Idh3a	Isocitrate dehydrogenase [NAD] subunit, mitochondrial;Isocitrate dehydrogenase [NAD] subunit alpha, mitochondrial	4860.84	3486.99	3551.2	1909.87	2079.05	2339.68	1382.53	2088.89	2446.47
A0A1L1STF0;Q6PDI6	A0A1L1STF0;Q6PDI6	Mindy2	Ubiquitin carboxyl-terminal hydrolase;Ubiquitin carboxyl-terminal hydrolase MINDY-2	32571.5	38764.4	33366.5	26700.8	25405.6	25424.6	19809.4	15739.7	19360.8
A0A1L1STF9;B9EI57;Q8CH25	A0A1L1STF9;B9EI57;Q8CH25	Sltm	SAFB-like, transcription modulator;SAFB-like, transcription modulator;SAFB-like transcription modulator	272969	309390	241357	408451	431771	478595	328288	358478	335008
A0A1L1STM6;E9PZ11	A0A1L1STM6;E9PZ11	Zfp651	Zinc finger protein 651 (Fragment);Zinc finger protein 651	640.027		2572.84				319.45	11152.5	669.223
A0A1L1STN6;F6RG10;O70255;Q3TLS6	A0A1L1STN6;F6RG10;O70255;Q3TLS6	Mpzl2	Myelin protein zero-like 2;Myelin protein zero-like 2;Myelin protein zero-like protein 2;Ig-like domain-containing protein		401.682		2321.51	681.51	844.403
A0A1L1SU37	A0A1L1SU37	Pkm	pyruvate kinase (Fragment)
A0A1L1SU89;D6RIN3;P56677;Q543E3	A0A1L1SU89;D6RIN3;P56677;Q543E3	St14	Suppression of tumorigenicity 14 (colon carcinoma);Suppression of tumorigenicity 14 (colon carcinoma);Suppressor of tumorigenicity 14 protein homolog;Suppressor of tumorigenicity 14 protein homolog	10702.6	7286.67	5370.92	3786.21	3756.75	3908.61	4917.56		3844.28
A0A1L1SU97;Q6P9L6	A0A1L1SU97;Q6P9L6	Kif15	Kinesin family member 15 (Fragment);Kinesin-like protein KIF15	3160.47	930.836	3379.34	38386.7	40648.1	37371	31660.3	29723.8	28608.8
A0A1L1SUS7;I6L9D3;Q8C5H7;Q8K0D0	A0A1L1SUS7;I6L9D3;Q8C5H7;Q8K0D0	Cdk17	Cyclin-dependent kinase 17 (Fragment);Pctk2 protein;Cyclin-dependent kinase 17;Cyclin-dependent kinase 17						3409.55
A0A1L1SUX7;A0A1L1SV91;B2RXQ8;Q8BFQ4	A0A1L1SUX7;A0A1L1SV91;B2RXQ8;Q8BFQ4	Wdr82	WD repeat domain containing 82;WD repeat domain containing 82;WD repeat domain containing 82;WD repeat-containing protein 82			979.508	1827.49		1944.07	1795.14		2670.12
A0A1L1SUX8;P01831;Q53YX2	A0A1L1SUX8;P01831;Q53YX2	Thy1	Thymus cell antigen 1, theta (Fragment);Thy-1 membrane glycoprotein;CD90.1				2352.77	1399.11	1808.63		958.276	1017.48
A0A1L1SV25;P57780;Q3UDJ7;Q3ULT2	A0A1L1SV25;P57780;Q3UDJ7;Q3ULT2	Actn4	Actinin alpha 4;Alpha-actinin-4;Alpha-actinin-4;Non-muscle alpha-actinin 4	20214.8	15204.7	16826.3	8841.52	7927.89	7855.45	8170.8	9834.46	6959.65
A0A1L1SV36;Q8BH79	A0A1L1SV36;Q8BH79	Ano10	Anoctamin (Fragment);Anoctamin-10		573.493	531.411			249.308
A0A1L1SV73;Q8BY87	A0A1L1SV73;Q8BY87	Usp47	Ubiquitin carboxyl-terminal hydrolase 47	3729.48	6404.67	4254.65	1373.63	1743.5	2147.29	3231.46	650.771	4308.98
A0A1L1SVA9;E9QKG3;Q9CWH5	A0A1L1SVA9;E9QKG3;Q9CWH5	Trmt11	tRNA methyltransferase 11 (Fragment);tRNA (guanine(10)-N2)-methyltransferase homolog;tRNA (guanine(10)-N2)-methyltransferase homolog	4554.84	5606.47	3140.26	2610.11	2236.32	2044.38	4506.99	1997.42
A0A1L1SVG6	A0A1L1SVG6	Slc44a2	Choline transporter-like protein	6904.44	9041.56	7342.67	3395.17	3601.32	3323.44	3954.11	2703.26	3263.99
A0A1L7NR37	A0A1L7NR37	Sorbs2	Arg/Abl-binding protein 2	45418.2	51603.5	58624.7	39285	35458.9	42446.2	54219.5	51541.4	50413.6
A0A1L7NR63	A0A1L7NR63	Sorbs1	C-Cbl associated protein	20557.8	20978.1	19836.5	10508.1	10925.5	10619.2	11516.8	10593.9	11196.6
A0A1N9M5I8;Q3UGY8	A0A1N9M5I8;Q3UGY8	Arfgef3	ARFGEF family member 3;Brefeldin A-inhibited guanine nucleotide-exchange protein 3	2620.92	2692.07	2870.16	4979.37	1801.79	3116.83	1961.18	489.784	838.155
A0A1N9PTV1	A0A1N9PTV1	Fbrs	Fibrosin	248982	234940	228297	1.13988e+06	544329	497186	278459	303683	282361
A0A1Q1MKH5;A0A1Q1MKI1;A0A6F8X1J9;A2AQQ8;A2VCP5;A2VCP6;F6R7A2;P12813;Q06219;Q3TYI4;Q545Q1;Q9QZB6;Q9R1W4	A0A1Q1MKH5;A0A1Q1MKI1;A0A6F8X1J9;A2AQQ8;A2VCP5;A2VCP6;F6R7A2;P12813;Q06219;Q3TYI4;Q545Q1;Q9QZB6;Q9R1W4	Nur77;Nur77;Nr4a3;Nr4a2;Nr4a3;Nr4a3;Nr4a3;Nr4a1;Nr4a2;Nr4a2;Nr4a1;Nr4a3;Nr4a2	Nuclear receptor subfamily 4 group A member 1;NUR77-1;Nuclear receptor subfamily 4 group A member 3;Nuclear receptor subfamily 4 group A member 2;Nr4a3 protein (Fragment);Nr4a3 protein (Fragment);Nuclear receptor subfamily 4, group A, member 3 (Fragment);Nuclear receptor subfamily 4 group A member 1;Nuclear receptor subfamily 4 group A member 2;Nuclear receptor subfamily 4 group A member 2;Nuclea…	4465.55					3877.97	12689.6
A0A1S6GWF9;A0A1S6GWG0;E0CYB9;E0CYI3;F6VAL0;F7B1A4;F7CTF8;Q6PCP5	A0A1S6GWF9;A0A1S6GWG0;E0CYB9;E0CYI3;F6VAL0;F7B1A4;F7CTF8;Q6PCP5	Mff	Mitochondrial fission factor;Mitochondrial fission factor;Mitochondrial fission factor;Mitochondrial fission factor;Mitochondrial fission factor (Fragment);Mitochondrial fission factor (Fragment);Mitochondrial fission factor (Fragment);Mitochondrial fission factor	6848.39	8179.67	8129.91	28367.5	27918.6	27944.2	45859	36145.3	39214.6
A0A1S6GWG6;P62814	A0A1S6GWG6;P62814	Atp6v1b2	Vacuolar proton pump subunit B;V-type proton ATPase subunit B, brain isoform	3630.7	1612.48	2367.2	934.233	1119.95	1590.8	1060.9	1515.58	1589.54
A0A1S6GWG7;A0A1S6GWG8;Q8R1X2;Q9JMC3	A0A1S6GWG7;A0A1S6GWG8;Q8R1X2;Q9JMC3	Dnaja4	DnaJ homolog subfamily A member 4;DnaJ homolog subfamily A member 4;Dnaja4 protein;DnaJ homolog subfamily A member 4	5153.86	5449.45	4667.28	1279	2278.63	3600.91	6414.76	1752.68	4093.78
A0A1S6GWH2;Q3T9L0;Q3TIE4;Q3TPL7;Q3U837;Q3UVN0;Q8VDW0;Q9Z1N5	A0A1S6GWH2;Q3T9L0;Q3TIE4;Q3TPL7;Q3U837;Q3UVN0;Q8VDW0;Q9Z1N5	Ddx39b;Ddx39a;Ddx39a;Ddx39a;Ddx39a;Ddx39a;Ddx39a;Ddx39b	RNA helicase;RNA helicase;RNA helicase;RNA helicase;RNA helicase;RNA helicase;ATP-dependent RNA helicase DDX39A;Spliceosome RNA helicase Ddx39b	5360.6	5613.51	6147.06	4221.47	4335.05	4334.11	3355.92	3053.37	3093.4
A0A1S6GWH3;A0A1S6GWH6;O88738;S4R1L5;S4R2P8	A0A1S6GWH3;A0A1S6GWH6;O88738;S4R1L5;S4R2P8	Birc6	UBC core domain-containing protein;UBC core domain-containing protein;Baculoviral IAP repeat-containing protein 6;Baculoviral IAP repeat-containing 6;Baculoviral IAP repeat-containing 6	16169.4	17923.1	18597.4	20119.1	19212.8	22306	11780.5	8681.87	9918.35
A0A1S6GWH4;Q1HFZ0	A0A1S6GWH4;Q1HFZ0	Nsun2	tRNA (cytosine(34)-C(5))-methyltransferase;RNA cytosine C(5)-methyltransferase NSUN2	22600.3	32137.3	27287.5	99780.3	100745	89677.4	24751.3	23957.9	27382.2
A0A1S6GWI9;P55302;Q3TL96;Q52KI7;Q5D0B0;Q6PB52;Q6PEM5;Q6ZY49;Q8C252;Q8K295	A0A1S6GWI9;P55302;Q3TL96;Q52KI7;Q5D0B0;Q6PB52;Q6PEM5;Q6ZY49;Q8C252;Q8K295	Lrpap1	Alpha-2-macroglobulin receptor-associated protein;Alpha-2-macroglobulin receptor-associated protein;Alpha-2-macroglobulin receptor-associated protein;Low density lipoprotein receptor-related protein associated protein 1;Lrpap1 protein (Fragment);Lrpap1 protein (Fragment);Lrpap1 protein (Fragment);Low density lipoprotein receptor-associated protein 1;Alpha-2-macroglobulin receptor-associated prote…	2861.66	1242.78							760.837
A0A1S6GWJ6;E9Q027;E9Q8D5;Q3TIJ0;Q5CZY5;Q8C5L3	A0A1S6GWJ6;E9Q027;E9Q8D5;Q3TIJ0;Q5CZY5;Q8C5L3	Cnot2	NOT2/NOT3/NOT5 C-terminal domain-containing protein;CCR4-NOT transcription complex, subunit 2;CCR4-NOT transcription complex, subunit 2;NOT2/NOT3/NOT5 C-terminal domain-containing protein;Cnot2 protein;CCR4-NOT transcription complex subunit 2	14859.8	17002.9	16480	43264.8	29102.1	45320.9	43050.8	46099.8	34674.7
A0A1S6GWK0;P46978;Q3TG02;Q3TUR1;Q3U573;Q3U9H4;Q3UA28;Q5U412;Q8BMP9	A0A1S6GWK0;P46978;Q3TG02;Q3TUR1;Q3U573;Q3U9H4;Q3UA28;Q5U412;Q8BMP9	Stt3a	dolichyl-diphosphooligosaccharide--protein glycotransferase;Dolichyl-diphosphooligosaccharide--protein glycosyltransferase subunit STT3A;dolichyl-diphosphooligosaccharide--protein glycotransferase;dolichyl-diphosphooligosaccharide--protein glycotransferase;dolichyl-diphosphooligosaccharide--protein glycotransferase;dolichyl-diphosphooligosaccharide--protein glycotransferase;dolichyl-diphosphoolig…	8659.81	7565.72	6117.04	1504.01	1633.13	1339.78	3457.28	3819.95	3101.39
A0A1S6GWK5;F6YY19;P58501	A0A1S6GWK5;F6YY19;P58501	Paxbp1	GCF C-terminal domain-containing protein;PAX3 and PAX7 binding protein 1 (Fragment);PAX3- and PAX7-binding protein 1	5085.89	3941.19	497.51	1030.68	680.781	1723.72	464.026	603.772
A0A1U6URG8;Q80TR0;Q8VHJ6;Q9JIH4;Q9WV30	A0A1U6URG8;Q80TR0;Q8VHJ6;Q9JIH4;Q9WV30	Nfat5	Nuclear factor of activated T cells 5;MKIAA0827 protein (Fragment);Nuclear factor of activated T-cells 5;NFATz2;Nuclear factor of activated T-cells 5	2494.93		4831.05	2392.81	2669.05	3210.03	3503.1	2303.86	2981.36
A0A1W2P6F6;A0A1W2P7Q9;Q60605;Q642K0	A0A1W2P6F6;A0A1W2P7Q9;Q60605;Q642K0	Myl6	Myosin, light polypeptide 6, alkali, smooth muscle and non-muscle;Myosin, light polypeptide 6, alkali, smooth muscle and non-muscle;Myosin light polypeptide 6;Myl6 protein	10685.4	7556.91	6952.56	7319.79	8056.46	7023.15	6976.37	5837.46	6167.21
A0A1W2P6H5;Q3TC93	A0A1W2P6H5;Q3TC93	Hs1bp3	HCLS1 binding protein 3 (Fragment);HCLS1-binding protein 3	1059.71	1726.61	1653.02	3541.63	5417.07	3781.05	5445.08	2621.26	2826.3
A0A1W2P6K6;Q5DU37;Q811D4	A0A1W2P6K6;Q5DU37;Q811D4	Zfyve26	Zinc finger FYVE domain-containing protein 26 (Fragment);Zinc finger FYVE domain-containing protein 26;Zinc finger FYVE domain-containing protein 26 (Fragment)	11031.7	13620.7	14662.4	17801.3	13595	14641.3	12601.3	23492	12105.6
A0A1W2P6K9;Q3UDY2;Q9JI99	A0A1W2P6K9;Q3UDY2;Q9JI99	Sgpp1	Sphingosine-1-phosphate phosphatase 1;Phosphatidic acid phosphatase type 2/haloperoxidase domain-containing protein;Sphingosine-1-phosphate phosphatase 1	1.7719e+06	1638337	1.89813e+06	1.21828e+06	1.45777e+06	1.30879e+06	1173976	1.25926e+06	1335808
A0A1W2P6Q8;A0A1W2P7H4;A0A1W2P7Z8;A0A1W2P855;Q3UCF2;Q6A068	A0A1W2P6Q8;A0A1W2P7H4;A0A1W2P7Z8;A0A1W2P855;Q3UCF2;Q6A068	Gm9044;Gm9048;Gm9045;Gm9046;Cdc5l;Cdc5l	Predicted gene 9040;Predicted gene 9048;Predicted gene 9045;Predicted gene 9046;Cell division cycle 5-like protein;Cell division cycle 5-like protein	16372.8	19941.1	30315.9	3256.56	3110.95	4732.31	2544.46	3722.43	4723.85
A0A1W2P6V9;Q3UMB9	A0A1W2P6V9;Q3UMB9	Washc4	WASH complex subunit 4		1152.23	970.581			84.2711
A0A1W2P6X3;A2AB60;Q9JL26	A0A1W2P6X3;A2AB60;Q9JL26	Fmnl1	Formin-like 1;Formin-like 1;Formin-like protein 1	2950.43	3298.8	3606.96	454.158	1754.56	1692.87		2129.75	1333.31
A0A1W2P6X9;A0A5F8MPQ7;E9Q374;F8VPM0;Q91YE5	A0A1W2P6X9;A0A5F8MPQ7;E9Q374;F8VPM0;Q91YE5	Baz2a	Bromodomain adjacent to zinc finger domain, 2A;Bromodomain adjacent to zinc finger domain, 2A;Bromodomain adjacent to zinc finger domain, 2A;Bromodomain adjacent to zinc finger domain, 2A;Bromodomain adjacent to zinc finger domain protein 2A	8442.55	7358.77	6263.93	14488.2	14458.4	15311.9	12042.7	13777.2	13977.4
A0A1W2P711;E9PY90;E9Q3S2;H3BJS0;H3BK44;H3BK48;H3BKH2;Q3TZZ3;Q91ZV0	A0A1W2P711;E9PY90;E9Q3S2;H3BJS0;H3BK44;H3BK48;H3BKH2;Q3TZZ3;Q91ZV0	Mia2	MIA SH3 domain ER export factor 2;MIA SH3 domain ER export factor 2;MIA SH3 domain ER export factor 2;MIA SH3 domain ER export factor 2;MIA SH3 domain ER export factor 2;MIA SH3 domain ER export factor 2;MIA SH3 domain ER export factor 2;Melanoma inhibitory activity protein 2;Melanoma inhibitory activity protein 2	22089.9	26196.7	24329.8	12910.5	12756.3	9428.39	11713.5	9967.02	10654.4
A0A1W2P721;Q8BY78;Q9Z191	A0A1W2P721;Q8BY78;Q9Z191	Eya4	Eyes absent homolog;Eyes absent homolog;Eyes absent homolog 4	57643.7	59567.2	67543.8	14889.1	12928	17336.2	17079.5	19875	19910
A0A1W2P729;Q9QXT0	A0A1W2P729;Q9QXT0	Cnpy2	Canopy FGF signaling regulator 2 (Fragment);Protein canopy homolog 2	19605.3	20386.6	22457.7	5273.29	4382.56	5463.34	12492.6	14120.1	11092.3
A0A1W2P730;O54784;Q05A21	A0A1W2P730;O54784;Q05A21	Dapk3	Death-associated protein kinase 3 (Fragment);Death-associated protein kinase 3;Death-associated protein kinase 3	2740.4	3358.21	3567.5	1257.07	2719.96	1985.4	2354	1819.54	2845.43
A0A1W2P733;Q3TW74;Q3UZH3;Q922D8	A0A1W2P733;Q3TW74;Q3UZH3;Q922D8	Mthfd1	C-1-tetrahydrofolate synthase, cytoplasmic;C-1-tetrahydrofolate synthase, cytoplasmic;C-1-tetrahydrofolate synthase, cytoplasmic (Fragment);C-1-tetrahydrofolate synthase, cytoplasmic	14572.8	13608	17779.1	8487.12	9659.56	8450.18	3732.02	5765.28	7004.77
A0A1W2P737;F8VPV0;P48725;Q80U10;Q8CDL2	A0A1W2P737;F8VPV0;P48725;Q80U10;Q8CDL2	Pcnt	Pericentrin (kendrin);Pericentrin (kendrin);Pericentrin;MKIAA0402 protein (Fragment);Pericentrin/AKAP-450 centrosomal targeting domain-containing protein (Fragment)	47738.2	56449.4	47387.8	33447.3	40950.5	33194.3	21426.8	16683.9	21411.1
A0A1W2P768;A1L0U3;A1L0V4;B9EI85;F8WI35;P02301;P68433;P84228;P84244	A0A1W2P768;A1L0U3;A1L0V4;B9EI85;F8WI35;P02301;P68433;P84228;P84244	H3c14;Hist1h3e;Hist1h3i;Hist2h3b;H3f3a;H3-5;H3c1;H3c2;H3-3a	H3 clustered histone 14;Histone H3 (Fragment);Histone H3 (Fragment);Histone H3;Histone H3;Histone H3.3C;Histone H3.1;Histone H3.2;Histone H3.3	66801.3	60619.5	53271.9	29734	36437.6	30718.6	78010.9	78094.4	74804
A0A1W2P775;B2RR82;E9QNG1;Q80TG5;Q9Z0R6	A0A1W2P775;B2RR82;E9QNG1;Q80TG5;Q9Z0R6	Itsn2;Itsn2;Itsn2;mKIAA1256;Itsn2	Intersectin 2 (Fragment);Intersectin 2;Intersectin 2;MKIAA1256 protein (Fragment);Intersectin-2	8335.38	8840.36	9931.1	12649.1	10870.3	14364.7	8880.7	10044.5	10218.3
A0A1W2P7A1;F7AEH4;P63323	A0A1W2P7A1;F7AEH4;P63323	Rps12	40S ribosomal protein S12;40S ribosomal protein S12;Small ribosomal subunit protein eS12	1500.98	4364.64	5176.8	2444.15	1827.34	2136.29	2446.4	3663.26	3041.42
A0A1W2P7C1;P70365	A0A1W2P7C1;P70365	Ncoa1	Nuclear receptor coactivator 1 (Fragment);Nuclear receptor coactivator 1	5772.5	4696.24	4383.21	6368.2	4836.82	7337.78	3196.76	3934.34	5598.16
A0A1W2P7D8;Q3UZJ4;Q61151	A0A1W2P7D8;Q3UZJ4;Q61151	Ppp2r5e	Protein phosphatase 2, regulatory subunit B', epsilon;Serine/threonine-protein phosphatase 2A 56 kDa regulatory subunit;Serine/threonine-protein phosphatase 2A 56 kDa regulatory subunit epsilon isoform	14583.2	12568	12547.3	20293	21765.5	21417.8	37991.6	35199.6	35948.4
A0A1W2P7H9;A0A1W2P7T3;P84089;Q4FZH7	A0A1W2P7H9;A0A1W2P7T3;P84089;Q4FZH7	Erh	Enhancer of rudimentary homolog			270.109	180.788		577.899		242.783
A0A1W2P7K2;Q9CQE6	A0A1W2P7K2;Q9CQE6	Asf1a	Anti-silencing function 1A histone chaperone;Histone chaperone ASF1A	793.261	3017.48	2754.98	2723.2	4121.05	2326.46
A0A1W2P7V0;K3W4Q9;Q3TAF1;Q8BH60	A0A1W2P7V0;K3W4Q9;Q3TAF1;Q8BH60	Gopc	Golgi associated PDZ and coiled-coil motif containing (Fragment);Golgi associated PDZ and coiled-coil motif containing;Golgi-associated PDZ and coiled-coil motif-containing protein;Golgi-associated PDZ and coiled-coil motif-containing protein	1035.27	1191.6	1739.32	1677.57		610.121			751.559
A0A1W2P870;A0A9K3FHU4;A0A9K3FI04;Q9D172	A0A1W2P870;A0A9K3FHU4;A0A9K3FI04;Q9D172	Gatd3a;mCG_115348;mCG_115348;Gatd3	Glutamine amidotransferase like class 1 domain containing 3A (Fragment);MCG115348, isoform CRA_b;MCG115348, isoform CRA_a;Glutamine amidotransferase-like class 1 domain-containing protein 3, mitochondrial	576.54	681.035	769.223			580.599
A0A1W2P8A8;Q99KK1	A0A1W2P8A8;Q99KK1	Reep3	Receptor expression-enhancing protein;Receptor expression-enhancing protein 3	10638.4	11365.5	12273.6	15274.2	25444.4	19026.7	4266.68	11931.3	5314.8
A0A1W2P8C0;Q9EPM8	A0A1W2P8C0;Q9EPM8	Epb41l2	Erythrocyte membrane protein band 4.1 like 2 (Fragment);4.1G protein (Fragment)				3653.25	3851.2	4941.25	7937.01	8740.51	8976.24
A0A1W2P8C6;P41731;Q3UC80;Q549D0;Q8BT06	A0A1W2P8C6;P41731;Q3UC80;Q549D0;Q8BT06	Cd63	CD63 antigen (Fragment);CD63 antigen;Tetraspanin;Tetraspanin;Tetraspanin	2030.16		1773.16		1925.33	2314.53			1678.17
A0A1Y7VJ37	A0A1Y7VJ37	Tspan13	Tetraspanin 13 (Fragment)				888.197	854.635			1068.38	398.964
A0A1Y7VJ48;P48428;Q5I0U7	A0A1Y7VJ48;P48428;Q5I0U7	Tbca	Tubulin-specific chaperone A	12771.5	16859.5	14388.5			4773.24	6958.76	8788.88	6314.51
A0A1Y7VJ69;A0A1Y7VJF3;A0A1Y7VLM5;P17141;Q6P3Z4;Q8CCM5;Q8R1B1	A0A1Y7VJ69;A0A1Y7VJF3;A0A1Y7VLM5;P17141;Q6P3Z4;Q8CCM5;Q8R1B1	Zfp37	Zinc finger protein 37;Zinc finger protein 37;Zinc finger protein 37;Zinc finger protein 37;Zinc finger protein 37;Zinc finger protein 37;Zfp37 protein (Fragment)	7963.44	4674.62	7321.23	9248.67	7801.59	7568.75	5507.57	8600.74	6563.47
A0A1Y7VJA2;E9PVP4;F8WJB9;P70429;Q6PB99	A0A1Y7VJA2;E9PVP4;F8WJB9;P70429;Q6PB99	Evl	Ena-vasodilator stimulated phosphoprotein (Fragment);Ena-vasodilator stimulated phosphoprotein;Ena-vasodilator stimulated phosphoprotein;Ena/VASP-like protein;Ena-vasodilator stimulated phosphoprotein	14167.2	14087.8	7566.31	9713.88	8264.97	8685.79	5044.01	5319.11	10786.3
A0A1Y7VJI5;A0A1Y7VMB5;Q3ULP2;Q3UWE6;Q8R0J5;Q9D5R2	A0A1Y7VJI5;A0A1Y7VMB5;Q3ULP2;Q3UWE6;Q8R0J5;Q9D5R2	Wdr20rt;Wdr20rt;Wdr20;Wdr20;Wdr20;Wdr20	WD repeat domain 20, retrogene (Fragment);WD repeat domain 20, retrogene;Uncharacterized protein;WD repeat domain 20;Wdr20a protein;WD repeat-containing protein 20			2143.37	3855.49	3677.93	3649.63	5088.61	4345.56
A0A1Y7VJW9;Q9WVH9	A0A1Y7VJW9;Q9WVH9	Fbln5	Fibulin 5;Fibulin-5	11467.3	9601.76	7886	4235.19	5005.13	3686.62	2919.86	1750.83	1656.19
A0A1Y7VK55;P70255;Q3UHA6	A0A1Y7VK55;P70255;Q3UHA6	Nfic	Nuclear factor 1;Nuclear factor 1 C-type;Nuclear factor 1	70119.4	49396.9	49136.6	44403.1	44937.1	37569.2	54905.6	40802.9	41992.4
A0A1Y7VKE7;A0A8Q0Q6C4;B2RQ11;Q8CD94	A0A1Y7VKE7;A0A8Q0Q6C4;B2RQ11;Q8CD94	Lin52	Protein lin-52 homolog (Fragment);Protein lin-52 homolog;Protein lin-52 homolog;Protein lin-52 homolog	1466.51	3039.14	3573.97	5705.84	2574.45	5042.17	10555.7	5038.84	9602.07
A0A1Y7VKN7;A0A1Y7VL28;Q80XC2	A0A1Y7VKN7;A0A1Y7VL28;Q80XC2	Trmt61a	tRNA (adenine(58)-N(1))-methyltransferase (Fragment);tRNA (adenine(58)-N(1))-methyltransferase (Fragment);tRNA (adenine(58)-N(1))-methyltransferase catalytic subunit TRMT61A
A0A1Y7VKR2;Q9D0E5	A0A1Y7VKR2;Q9D0E5	Efcab11	EF-hand calcium binding domain 11 (Fragment);EF-hand calcium-binding domain-containing protein 11		26608.8	23189.6	6556.17		7541.38		10825.8	9394.36
A0A1Y7VKX4;Q3U1V8;Q8K2L2	A0A1Y7VKX4;Q3U1V8;Q8K2L2	Map3k9	Mitogen-activated protein kinase kinase kinase;Mitogen-activated protein kinase kinase kinase 9;Map3k9 protein (Fragment)	8363.63	5486.15	5762.58	10429.2	6153.86	6128.04	5436.21	8015.22	9694.42
A0A1Y7VKX7;F8WJA0;Q3TLR1;Q3U7R4;Q3UYV7;Q9CRZ6;Q9ESV0	A0A1Y7VKX7;F8WJA0;Q3TLR1;Q3U7R4;Q3UYV7;Q9CRZ6;Q9ESV0	Ddx24	ATP-dependent RNA helicase;ATP-dependent RNA helicase;ATP-dependent RNA helicase;ATP-dependent RNA helicase;ATP-dependent RNA helicase (Fragment);Uncharacterized protein (Fragment);ATP-dependent RNA helicase DDX24	1386.08	1336.96	939.958	3431.93	3264.95	3311.7	1135.49	1471.12	2684.85
A0A1Y7VKY1;F6YVP7;P62270;Q3TW65;Q561N5	A0A1Y7VKY1;F6YVP7;P62270;Q3TW65;Q561N5	Rps18-ps5;Rps18-ps6;Rps18;Rps18;Rps18	40S ribosomal protein S18;40S ribosomal protein S18;Small ribosomal subunit protein uS13;40S ribosomal protein S18;40S ribosomal protein S18	11625.2	10221.8	8809.71	3929.58	2690.27	3101.77	11029.2	11467.4	11708.9
A0A1Y7VL34;Q9D2N4	A0A1Y7VL34;Q9D2N4	Dtna	Dystrobrevin;Dystrobrevin alpha	27505.3	23330.3	24716.1	6924.65	7670.75	7811.79	7234.58	6097.49	6227.09
A0A1Y7VL44;E9Q6P5	A0A1Y7VL44;E9Q6P5	Ttc7b	Tetratricopeptide repeat domain 7B;Tetratricopeptide repeat protein 7B	19453.9	18452.8	19210.5	6417.22	6947.29	8160.73	13430	12649.1	11368.3
A0A1Y7VLA4;Q5DTT3	A0A1Y7VLA4;Q5DTT3	Tasor2	Transcription activation suppressor family member 2 (Fragment);Protein TASOR 2	5973.59	4127.76	5324.05	11386.8	11434.6	11336.1	10685.7	9701.89	8111.08
A0A1Y7VLD6;Q8BH66	A0A1Y7VLD6;Q8BH66	Atl1	Atlastin GTPase 1 (Fragment);Atlastin-1	54.3308							2408.3	2308.99
A0A1Y7VLN4;A0A5F8MPG1;A0A5F8MQ53;E9QKQ5;Q3U3C3;Q80XT6;Q8CD95;Q8CFH3;Q91ZP3	A0A1Y7VLN4;A0A5F8MPG1;A0A5F8MQ53;E9QKQ5;Q3U3C3;Q80XT6;Q8CD95;Q8CFH3;Q91ZP3	Lpin1	phosphatidate phosphatase;phosphatidate phosphatase;phosphatidate phosphatase;phosphatidate phosphatase;phosphatidate phosphatase;phosphatidate phosphatase;phosphatidate phosphatase;MKIAA0188 protein (Fragment);Phosphatidate phosphatase LPIN1	10492.1	8864.96	8134.46	3331.66	4299.5	3320.65	2963.79	3541.02	2256.92
A0A1Y7VLP0;P56379	A0A1Y7VLP0;P56379	Atp5mpl	ATP synthase membrane subunit 6.8PL (Fragment);ATP synthase subunit ATP5MPL, mitochondrial			287.174			379.998			656.333
A0A1Y7VLZ7;E9Q7E9;Q3V3Q7	A0A1Y7VLZ7;E9Q7E9;Q3V3Q7	Pacs2	Phosphofurin acidic cluster sorting protein 2	12393.5	15091.5	16080.9	19607.8	16220	20092.9	18260.9	13805.5	16301.9
A0A1Y7VM69;Q9D4H4	A0A1Y7VM69;Q9D4H4	Amotl1	Angiomotin-like 1;Angiomotin-like protein 1	40132.5	29393.9	34280.2	16087.4	7885.31	15794.4	13278.9	7587.79	3916.87
A0A1Y7VME9;A0A1Y7VMH7;A0A1Y7VNF8;B2RXL7;E9Q9B7;Q3V2X2;Q80SX9;Q80TG7	A0A1Y7VME9;A0A1Y7VMH7;A0A1Y7VNF8;B2RXL7;E9Q9B7;Q3V2X2;Q80SX9;Q80TG7	Kidins220;Kidins220;Kidins220;Kidins220;Kidins220;Kidins220;Kidins220;mKIAA1250	Kinase D-interacting substrate 220;Kinase D-interacting substrate 220;Kinase D-interacting substrate 220 (Fragment);Kidins220 protein;Kinase D-interacting substrate 220;KAP NTPase domain-containing protein (Fragment);Kidins220 protein (Fragment);MKIAA1250 protein (Fragment)		1737.21			1774.34	1590.14		2297.86	2762.63
A0A1Y7VMK3;A2A7R5;E9PV73;P62748;P84075	A0A1Y7VMK3;A2A7R5;E9PV73;P62748;P84075	Hpcal1;Hpca;Hpca;Hpcal1;Hpca	Hippocalcin-like 1 (Fragment);Hippocalcin (Fragment);Hippocalcin (Fragment);Hippocalcin-like protein 1;Neuron-specific calcium-binding protein hippocalcin	8677.99	5095.54	10587.6		1629.15		1691.01	3227.8	1912.25
A0A1Y7VMT6;Q8C4S7;Q8C9W5;Q9EQH2	A0A1Y7VMT6;Q8C4S7;Q8C9W5;Q9EQH2	Erap1;;Erap1;Erap1	Endoplasmic reticulum aminopeptidase 1 (Fragment);Uncharacterized protein;Aminopeptidase (Fragment);Endoplasmic reticulum aminopeptidase 1	5186.06	725.922	2766.22	3725.09	407.845		2583.27	694.138
A0A1Y7VN19;Q9CXR1	A0A1Y7VN19;Q9CXR1	Dhrs7	Dehydrogenase/reductase (SDR family) member 7 (Fragment);Dehydrogenase/reductase SDR family member 7	5919.51	7100.56	4833.68	1464.36	1240.09	1161.09	425.98	2569.42	2054.42
A0A1Y7VNC5;Q61043	A0A1Y7VNC5;Q61043	Nin	Ninein	2172.67	5859.69	6336.86	2689.1	3329.81	1733.32		745.916
A0A1Y7VNU2;G5E8J4;Q05DI4;Q4KML9;Q62136;Q7TMG1	A0A1Y7VNU2;G5E8J4;Q05DI4;Q4KML9;Q62136;Q7TMG1	Ptpn21	protein-tyrosine-phosphatase (Fragment);Tyrosine-protein phosphatase non-receptor type;protein-tyrosine-phosphatase (Fragment);Tyrosine-protein phosphatase non-receptor type;Tyrosine-protein phosphatase non-receptor type 21;Ptpn21 protein (Fragment)	2515.46		1133.85	3475.85	3095.88	3501.13	4466.05	1130.54
A0A1Y7VNZ6;Q03141;Q9JKE5	A0A1Y7VNZ6;Q03141;Q9JKE5	Mark3	non-specific serine/threonine protein kinase;MAP/microtubule affinity-regulating kinase 3;non-specific serine/threonine protein kinase	424.701	879.95	1644.38	514.739	871.242	708.545	111.418	316.6
A0A1Y7VP67;E9Q2I4;Q3U224;Q8BUZ9	A0A1Y7VP67;E9Q2I4;Q3U224;Q8BUZ9	Mideas	Mitotic deacetylase associated SANT domain protein (Fragment);Mitotic deacetylase associated SANT domain protein;ELM2 and SANT domain-containing protein 1 (Fragment);ELM2 and SANT domain-containing protein 1 (Fragment)	6320.31	4406.21	10988.5	7818.09	4508.71	5537.84	6009.92	9310.86	6783.14
A0A1Y7VP81;A1L2Z3;Q8C7X2;Z4YJW0	A0A1Y7VP81;A1L2Z3;Q8C7X2;Z4YJW0	Emc1	ER membrane protein complex subunit 1 (Fragment);ER membrane protein complex subunit 1;ER membrane protein complex subunit 1;ER membrane protein complex subunit 1	3.02787	1
A0A1Z3MHX1;A0A1Z3MHY1;A0A1Z3MHY5;L0HCN1;Q9R002	A0A1Z3MHX1;A0A1Z3MHY1;A0A1Z3MHY5;L0HCN1;Q9R002	Ifi202b;Ifi202a;Ifi202c;;Ifi202	Ifi202b;Ifi202a;Ifi202c;Ifi202b;Interferon-activable protein 202	2306.47	1740.85	914.555	1390.89	2599.24	1453.9	1827.86	2737.81
A0A1Z3MI21;P0DOV1;Q8CGE8	A0A1Z3MI21;P0DOV1;Q8CGE8	Ifi205;Mnda;Ifi205a	Ifi205;Interferon-activable protein 205-B;Interferon-activable protein 205-A	5514.31	1679.06	4831.22	908.383	1929.74	820.959	1779.06	1480.94	3290.65
A0A217FL69;Q8BN01;Q8R3I2	A0A217FL69;Q8BN01;Q8R3I2	Mboat2	Membrane bound O-acyltransferase domain containing 2;Uncharacterized protein;Lysophospholipid acyltransferase 2	20034.4	22483.5	23371.9	5914.85	6880.53	7806.51	7638.58	10225.7	9151.61
A0A249JQT6;A0A286YCG5;A0A286YDE2;Q8K5B1	A0A249JQT6;A0A286YCG5;A0A286YDE2;Q8K5B1	Il31ra	Interleukin 31 receptor A;Interleukin 31 receptor A;Interleukin 31 receptor A;Interleukin-31 receptor subunit alpha	202366			1661.96	1130.96	1837.43
A0A286YCB3;A0A286YD15;A0A286YDP0;A0A286YDS3;O35648;Q545L8;Q9CYN1;Q9D046	A0A286YCB3;A0A286YD15;A0A286YDP0;A0A286YDS3;O35648;Q545L8;Q9CYN1;Q9D046	Cetn3	Centrin 3 (Fragment);Centrin 3 (Fragment);Centrin 3 (Fragment);Centrin 3 (Fragment);Centrin-3;EF-hand domain-containing protein;EF-hand domain-containing protein;EF-hand domain-containing protein	4314.68	4718.75	5305.46	2875.04	4208.92	2895.6	4830.55	3349.78	2798.34
A0A286YCD6;A0A286YCS1;A0A286YDT6;Q3ULA2	A0A286YCD6;A0A286YCS1;A0A286YDT6;Q3ULA2	Btrc	Beta-transducin repeat containing protein (Fragment);Beta-transducin repeat containing protein (Fragment);Beta-transducin repeat containing protein;F-box/WD repeat-containing protein 1A	8402.35	5943.3	6471.55	3343.27	3610.07	5151.5		4325.28	4564.93
A0A286YCD7;A0A286YCN3;P55264;Q8BMC5	A0A286YCD7;A0A286YCN3;P55264;Q8BMC5	Adk	Adenosine kinase (Fragment);Adenosine kinase (Fragment);Adenosine kinase;Adenosine kinase	6843.97	4606.79	4794.39	1811.15	1233.92	1789.13	1185.17	1959.73	1499.9
A0A286YCG3	A0A286YCG3	Ppp6r3	Protein phosphatase 6, regulatory subunit 3 (Fragment)	17358.3	15723.4	16067.3	50230.3	49339.7	44694.3	41861.6	43128.2	40905.8
A0A286YCG8;A0A286YCT4;A0A286YDB7;Q3TV94;Q52PE3;Q9CY50	A0A286YCG8;A0A286YCT4;A0A286YDB7;Q3TV94;Q52PE3;Q9CY50	Ssr1	Translocon-associated protein subunit alpha;Translocon-associated protein subunit alpha;Translocon-associated protein subunit alpha (Fragment);Translocon-associated protein subunit alpha;Translocon-associated protein subunit alpha;Translocon-associated protein subunit alpha	1245.94	2108.83	589.462	1015.49	1310.26	1557.23	1536.09		615.273
A0A286YCQ5;O88322;Q3TPN0;Q3US45;Q8CFA3;Q8R5G0	A0A286YCQ5;O88322;Q3TPN0;Q3US45;Q8CFA3;Q8R5G0	Nid2;Nid2;Nid2;Nid2;NID-2;Nid2	Nidogen 2 (Fragment);Nidogen-2;Nidogen-2;Nidogen-2;Nidogen-2;Nidogen 2 protein	1610.76	3746.89	2783.82	1032.27	466.51	849.495	3730.01	2563.25	4287.6
A0A286YCS0;A0A286YDT0;Q7TMY4	A0A286YCS0;A0A286YDT0;Q7TMY4	Thoc7	THO complex subunit 7 homolog;THO complex subunit 7 homolog (Fragment);THO complex subunit 7 homolog	8334.99	5667.65	8419.27		596.803	1382.32		3372.44
A0A286YCS6;D3YTR7;Q8BKZ3;Q9CYT6	A0A286YCS6;D3YTR7;Q8BKZ3;Q9CYT6	Cap2	CAP, adenylate cyclase-associated protein, 2 (yeast);Adenylyl cyclase-associated protein;C-CAP/cofactor C-like domain-containing protein;Adenylyl cyclase-associated protein 2	15123.7	15474.3	14940.9	4511.01	4219.24	5316.96	7103.73	7253.06	6963.69
A0A286YCV9;E9Q4K7	A0A286YCV9;E9Q4K7	Kif13b	Kinesin family member 13B	24656	30408.6	28667.2	33770.6	34862.1	37599	38852.4	31639.2	35485.6
A0A286YCX3;B2RX01;D3Z716;Q78WV9;Q8BSL0	A0A286YCX3;B2RX01;D3Z716;Q78WV9;Q8BSL0	Zkscan8	Zinc finger with KRAB and SCAN domains 8;Zfp192 protein;Zinc finger with KRAB and SCAN domains 8 (Fragment);Zinc finger with KRAB and SCAN domains 8;Zinc finger with KRAB and SCAN domains 8	1191.14	628.652	2775.71	639.34	1115.86	2484.99		484.616	569.324
A0A286YCX6	A0A286YCX6	Trappc8	Trafficking protein particle complex 8	19931.1	18176.3	12832.9	4808.07	5143.56	4734.08	4683.33	4969.19	5532.56
A0A286YCY3	A0A286YCY3	Kif20b	Kinesin family member 20B (Fragment)				2626.68	2449.69		1215.82	2388.63	1745.45
A0A286YD12;Q3UUI1;Q91YP2	A0A286YD12;Q3UUI1;Q91YP2	Nln	Neurolysin (metallopeptidase M3 family);Peptidase M3A/M3B catalytic domain-containing protein;Neurolysin, mitochondrial	2528.91	1549.41		1682.48	4550.73	2262.58		887.359	2540.2
A0A286YD33	A0A286YD33	Zfp457	Zinc finger protein 457 (Fragment)					593.584	1313.89	10569.2	3073.5
A0A286YD46;A0A286YDK8;D3Y273;E3UVT8;F8VQC9;H6WZF5;I1VGT4;J9RV59;J9S4N6;J9S7F7;U3RKD2	A0A286YD46;A0A286YDK8;D3Y273;E3UVT8;F8VQC9;H6WZF5;I1VGT4;J9RV59;J9S4N6;J9S7F7;U3RKD2	Slc4a7	Anion exchange protein	2771.01	2518.54	1696.83	8933.95	8015.54	6383.86	4701.18	6064.98	3781.73
A0A286YDA2;A0A286YDT3;A0A286YDV7;E9Q5C9	A0A286YDA2;A0A286YDT3;A0A286YDV7;E9Q5C9	Nolc1	Nucleolar and coiled-body phosphoprotein 1;Nucleolar and coiled-body phosphoprotein 1;Nucleolar and coiled-body phosphoprotein 1 (Fragment);Nucleolar and coiled-body phosphoprotein 1	25426.5	23880.4	31845.2	36803.9	42064.5	36575.3	32221.6	24692.7	26989
A0A286YDA5;A0A286YDZ5;A0A286YE10;O70293;O70296;Q3TST4;Q3TTW2;Q3UK88;Q792R0;Q8VEB1;Q9EP84	A0A286YDA5;A0A286YDZ5;A0A286YE10;O70293;O70296;Q3TST4;Q3TTW2;Q3UK88;Q792R0;Q8VEB1;Q9EP84	Grk6;Grk6;Grk6;Grk6;GRK6;Grk5;Grk6;Grk6;GRK6;Grk5;Grk6	G protein-coupled receptor kinase;G protein-coupled receptor kinase;G protein-coupled receptor kinase;G protein-coupled receptor kinase 6;G protein-coupled receptor kinase;G protein-coupled receptor kinase;G protein-coupled receptor kinase (Fragment);G protein-coupled receptor kinase;G protein-coupled receptor kinase;G protein-coupled receptor kinase 5;G protein-coupled receptor kinase		856.915	617.698	564.824	1401.5	649.89
A0A286YDB3;Q3U325;Q4KMV6;Q571D8;Q80XQ2	A0A286YDB3;Q3U325;Q4KMV6;Q571D8;Q80XQ2	Tbc1d5	TBC1 domain family, member 5;Rab-GAP TBC domain-containing protein;Tbc1d5 protein;MKIAA0210 protein (Fragment);TBC1 domain family member 5	42821.3	41171.5	43313	34961.7	37990	40499.5	34382.7	36415.1	34982.4
A0A286YDC0;Q03147;Q3THG5;Q8CAC4	A0A286YDC0;Q03147;Q3THG5;Q8CAC4	Cdk7	Cyclin-dependent kinase 7	51061.7	47664.8	48588.3	35623.4	49399	38277.4	55419.4	67331.6	46869.6
A0A286YDF5;B9EK95;Q69ZN7	A0A286YDF5;B9EK95;Q69ZN7	Myof	Myoferlin;Myof protein;Myoferlin	84462.6	89153.2	76705.4	72105	77512.1	63292.4	81305	71497	54561.9
A0A286YDI8;G3X972;Q3V222;Q80U83;Q8CGF4;Q8R2V9	A0A286YDI8;G3X972;Q3V222;Q80U83;Q8CGF4;Q8R2V9	Sec24c	Sec24 related gene family, member C (S. cerevisiae);Sec24 related gene family, member C (S. cerevisiae);Sec24c protein (Fragment);MKIAA0079 protein (Fragment);Sec24 related gene family, member C (S. cerevisiae);Sec24c protein (Fragment)	1045.28	1769.59	3462.95	1094.99	2793.86	2199.64	62.7376		428.701
A0A286YDK4;E9Q4Y4	A0A286YDK4;E9Q4Y4	Cep192	Centrosomal protein 192 (Fragment);Centrosomal protein 192	1429.51			3309.44	3835.85	5372.66	3493.16	1211.84
A0A286YDL4;Q8R2S9	A0A286YDL4;Q8R2S9	Actr8	ARP8 actin-related protein 8 (Fragment);Actin-related protein 8	14688	4228.11	5866.13	17522.4	11081.2	5753.93	9373.88	6110.39	7130
A0A286YDN1;Q8VC03	A0A286YDN1;Q8VC03	Eml3	Echinoderm microtubule associated protein like 3;Echinoderm microtubule-associated protein-like 3	38894.3	34375	30934.4	16446.9	15859.3	17128	16084.9	19978.9	19215.3
A0A286YDN9;D3YTL8	A0A286YDN9;D3YTL8	Spire1	Spire type actin nucleation factor 1	12969.8	13675.1	9720.4	4462.38	3799.16	3057.65
A0A286YDS5;Q3TFU8;Q3U7N8;Q6PDC2;Q8BLM5;Q99KF1;Q9CZL0	A0A286YDS5;Q3TFU8;Q3U7N8;Q6PDC2;Q8BLM5;Q99KF1;Q9CZL0	Tmed9	Transmembrane p24 trafficking protein 9;GOLD domain-containing protein;GOLD domain-containing protein;Tmed9 protein;GOLD domain-containing protein;Transmembrane emp24 domain-containing protein 9;GOLD domain-containing protein	488.92	6680.49	1744.9	3159.48	557.948			481.797	649.052
A0A286YDY1;A0A286YE27;Q3U2K0	A0A286YDY1;A0A286YE27;Q3U2K0	Fam193b	Family with sequence similarity 193, member B (Fragment);Family with sequence similarity 193, member B;Protein FAM193B	5869.91	4026.05	5970.16	7420.51	4678.67	4951.73			5094.76
A0A286YE25;A0A3B2WC92;Q9QYY8	A0A286YE25;A0A3B2WC92;Q9QYY8	Spast	Spastin	1215.17		1359.03	540.621	938.615	1253.9	444.75	1838.05	1265.97
A0A286YE36;E9QAE4;O88491	A0A286YE36;E9QAE4;O88491	Nsd1	Nuclear receptor-binding SET-domain protein 1;Nuclear receptor-binding SET-domain protein 1;Histone-lysine N-methyltransferase, H3 lysine-36 specific	13628.3	12572.6	11570.9	13749.3	11557.7	14490.9	10770.1	10016.9	5267.95
A0A286YEC5;Q3TSC0;Q5DTN0	A0A286YEC5;Q3TSC0;Q5DTN0	Kif13a	Kinesin family member 13A (Fragment);Kinesin-like protein KIF13A (Fragment);MKIAA4109 protein (Fragment)	1394.26		1343.71	680.387	854.552	2179.42	1035.15
A0A2C9F2D2;Q07076;Q3TJ49;Q3UYL7;Q8BP75;Q922A2	A0A2C9F2D2;Q07076;Q3TJ49;Q3UYL7;Q8BP75;Q922A2	Anxa7	Annexin;Annexin A7;Annexin;Annexin;Annexin;Annexin	8936.79	5024.62	12048	1179.13	1890.26	1372.09	2846.53	1013.03	1718.48
A0A2D0VMX2;A0A2I3BPM7;Q8CBY1	A0A2D0VMX2;A0A2I3BPM7;Q8CBY1	Samd4;Samd4;Samd4a	Sterile alpha motif domain containing 4 transcript variant 5;Sterile alpha motif domain containing 4;Protein Smaug homolog 1	11709.1	10168.5	12433.2	8480.19	7079.68	8491.32	12393.5	11701.8	10145
A0A2I3BPE9;A0A2I3BPP1;A0A2I3BRT5;Q3TBX9;Q3UG84;Q3UG88;Q3UGI8;Q3UHB2;Q7TT21	A0A2I3BPE9;A0A2I3BPP1;A0A2I3BRT5;Q3TBX9;Q3UG84;Q3UG88;Q3UGI8;Q3UHB2;Q7TT21	Tsc2	TSC complex subunit 2 (Fragment);TSC complex subunit 2;TSC complex subunit 2;Tuberin (Fragment);Tuberin (Fragment);Rap-GAP domain-containing protein;Rap-GAP domain-containing protein (Fragment);TSC complex subunit 2;TSC complex subunit 2	8912.63	8205.32	9227.41	8249.11	8331.65	4853.15	8447.39	5633.56	9079.51
A0A2I3BPL6;Q3U343;Q91VY9	A0A2I3BPL6;Q3U343;Q91VY9	Zfp622;Zfp622;Znf622	Zinc finger protein 622 (Fragment);C2H2-type domain-containing protein;Cytoplasmic 60S subunit biogenesis factor ZNF622		8800.85
A0A2I3BPQ0;Q9D0V7	A0A2I3BPQ0;Q9D0V7	Ebag9	Estrogen receptor-binding fragment-associated gene 9 (Fragment);Receptor-binding cancer antigen expressed on SiSo cells	92818.6	89502.9	77752.8	81823.2	70232.9	72376.8	48347.4	29825.3	40594.4
A0A2I3BPQ5	A0A2I3BPQ5	Zc3h13	Zinc finger CCCH type containing 13	5717.63	6266.69	6321.78	4850.82		6086.41	3158.93
A0A2I3BPR1;A2RRY6;B7ZMQ8;Q9D1D6	A0A2I3BPR1;A2RRY6;B7ZMQ8;Q9D1D6	Cthrc1	Collagen triple helix repeat containing 1;Collagen triple helix repeat containing 1;Cthrc1 protein;Collagen triple helix repeat-containing protein 1	801.468				113.193	140.873	190.854		316.73
A0A2I3BPU9;O35161;Q571L9	A0A2I3BPU9;O35161;Q571L9	Celsr1	Cadherin, EGF LAG seven-pass G-type receptor 1 (Fragment);Cadherin EGF LAG seven-pass G-type receptor 1;MKIAA4041 protein (Fragment)	5577.44	4441.85	4604	6819.88	6652.94	6943.36	5595.5	5049.05	4415.9
A0A2I3BPX1;B7ZP05;Q3U482;Q7TNJ0	A0A2I3BPX1;B7ZP05;Q3U482;Q7TNJ0	Dcstamp	Dendrocyte expressed seven transmembrane protein;Tm7sf4 protein;Dendritic cell-specific transmembrane protein-like domain-containing protein;Dendritic cell-specific transmembrane protein		1059.13	1636.25		477.663	1088.85
A0A2I3BPX9;Q3U1B2;Q3UQ47;Q3V1H4;Q60775	A0A2I3BPX9;Q3U1B2;Q3UQ47;Q3V1H4;Q60775	Elf1	E74 like ETS transcription factor 1;ETS domain-containing protein;ETS domain-containing protein (Fragment);ETS domain-containing protein;ETS-related transcription factor Elf-1	20117	20270	22028.7	10842.9	10437.1	13495.9	17240.8	16399.8	17852.3
A0A2I3BQ16;P62046;Q3TU90;Q3UP01	A0A2I3BQ16;P62046;Q3TU90;Q3UP01	Lrch1	Leucine-rich repeats and calponin homology (CH) domain containing 1;Leucine-rich repeat and calponin homology domain-containing protein 1;Calponin-homology (CH) domain-containing protein;Calponin-homology (CH) domain-containing protein (Fragment)	8978.09	7500.11	11130.1	6675.04	5868.11	7149.77	10579	10067.1	12214.1
A0A2I3BQ39;B2RTM4;P58321;Q8BWQ9;Q9JKB1	A0A2I3BQ39;B2RTM4;P58321;Q8BWQ9;Q9JKB1	Uchl3;Uchl4;Uchl4;Uchl3;Uchl3	Ubiquitin carboxyl-terminal hydrolase (Fragment);Ubiquitin carboxyl-terminal hydrolase;Ubiquitin carboxyl-terminal hydrolase isozyme L4;Ubiquitin carboxyl-terminal hydrolase;Ubiquitin carboxyl-terminal hydrolase isozyme L3	24930.2	15476	15977.1	8834.73	9372.71	9820.04	9208.29	9199.23	7480.5
A0A2I3BQ50;A0A2I3BQH8;A0A2I3BRB9;E9QNH7;Q5CZX6;Q5XG73;Z4YM84	A0A2I3BQ50;A0A2I3BQH8;A0A2I3BRB9;E9QNH7;Q5CZX6;Q5XG73;Z4YM84	Acbd5	Acyl-CoA-binding domain-containing protein 5;Acyl-CoA-binding domain-containing protein 5;Acyl-CoA-binding domain-containing protein 5;Acyl-CoA-binding domain-containing protein 5;Acyl-CoA-binding domain-containing protein 5 (Fragment);Acyl-CoA-binding domain-containing protein 5;Acyl-CoA-binding domain-containing protein 5	1965.86		609.081	1720.13	3225.44	4274.77	2192.86	1799.43	562.721
A0A2I3BQE0;Q9JI10	A0A2I3BQE0;Q9JI10	Stk3	non-specific serine/threonine protein kinase;Serine/threonine-protein kinase 3	14276.5	20869.2	24124.9	18267.2	22072.6	22216.5	9179.9	10257	10396.5
A0A2I3BQG2;B2RWW9;B7ZCC2	A0A2I3BQG2;B2RWW9;B7ZCC2	Crybg2	Crystallin beta-gamma domain containing 2;Absent in melanoma 1-like;Crystallin beta-gamma domain containing 2	44001.5	37867.6	45149.5	70950.5	58832.7	57967.3	43858.5	40088	40225.1
A0A2I3BQJ3;Q8K072	A0A2I3BQJ3;Q8K072	Reep4	Receptor expression-enhancing protein;Receptor expression-enhancing protein 4	7542.04	7819.95	6765.42	60088.7	52501.5	51874.5	44223.8	35240	40719.4
A0A2I3BQS6;E9Q2H1;Q80TP3	A0A2I3BQS6;E9Q2H1;Q80TP3	Ubr5	Ubiquitin protein ligase E3 component n-recognin 5;Ubiquitin protein ligase E3 component n-recognin 5;E3 ubiquitin-protein ligase UBR5	3520.05	2771.15	3853.63	7841.89	4322.96	3237.67	6880.54	7033.81	6935.5
A0A2I3BQT2;A0A2I3BRP6;Q0KL02	A0A2I3BQT2;A0A2I3BRP6;Q0KL02	Trio	Triple functional domain (PTPRF interacting) (Fragment);Triple functional domain (PTPRF interacting);Triple functional domain protein	1105.44	506.697	1121.87	1724.04					1291.97
A0A2I3BQU5;E9PZM7;Q6ZPE9;Q9CSS1	A0A2I3BQU5;E9PZM7;Q6ZPE9;Q9CSS1	Scaf11	SR-related CTD-associated factor 11;SR-related CTD-associated factor 11;MKIAA3013 protein (Fragment);Protein SCAF11 (Fragment)	27308.8	20764	20892.4	22848.4	21378.3	20328.3	16419.6	19383	13810.1
A0A2I3BR78;Q8R2P7;Q9CSH3	A0A2I3BR78;Q8R2P7;Q9CSH3	Dis3	DIS3 homolog, exosome endoribonuclease and 3'-5' exoribonuclease;DIS3 mitotic control homolog (S. cerevisiae);Exosome complex exonuclease RRP44
A0A2I3BRC5;F8VQ52;Q01341	A0A2I3BRC5;F8VQ52;Q01341	Adcy6	Adenylate cyclase type 6	12472.8	14140.3	12841.4	9784.99	10459.5	8072.07	9774.13	10309.1	9364.15
A0A2I3BRD5;Q8BHC8	A0A2I3BRD5;Q8BHC8	Sybu	Syntabulin (syntaxin-interacting)	1895.05	1713.86		821.842	72.0275
A0A2I3BRG0;P29595;Q3UI46	A0A2I3BRG0;P29595;Q3UI46	Nedd8	Neural precursor cell expressed, developmentally down-regulated gene 8 (Fragment);NEDD8;NEDD8	21949.6	20305.9	20701.9	3307.31	2321.25	3332.49		466.617	2988.91
A0A2I3BRG1;Q8BKI2	A0A2I3BRG1;Q8BKI2	Tnrc6b	Trinucleotide repeat containing 6b (Fragment);Trinucleotide repeat-containing gene 6B protein	21792.4	3112.14	40216.7	21076.9	23054	18643.5	15414.7	12043.3	19813.3
A0A2I3BRL8;Q91VM5	A0A2I3BRL8;Q91VM5	Gm7324;Rbmxl1	Predicted gene 7324;RNA binding motif protein, X-linked-like-1	194345	174106	203243	275675	246079	170375	158335	193721	179373
A0A2I3BRP5;Q64355;Q8K0F6	A0A2I3BRP5;Q64355;Q8K0F6	Efs	Embryonal Fyn-associated substrate	25471.4	25550.7	22721.1	24418.6	22076.2	24407.4	25131.8	15860	24972.1
A0A2I3BRQ3;Q61704	A0A2I3BRQ3;Q61704	Itih3	Inter-alpha trypsin inhibitor, heavy chain 3;Inter-alpha-trypsin inhibitor heavy chain H3	2519.26	1657.9	2635.59	2057.13	187.998	4016.02	3569.78	9257.38	1932.65
A0A2I3BRR0;Q8K120	A0A2I3BRR0;Q8K120	Nfatc4	Nuclear factor of activated T cells, cytoplasmic, calcineurin dependent 4;Nuclear factor of activated T-cells, cytoplasmic 4	3381.54	1638.2	2416.1	2843.59	2317.03	3081.88	1173.52	1168.65	1255.05
A0A2I3BRU5;G3X8U8;O88622;Q3TUI8	A0A2I3BRU5;G3X8U8;O88622;Q3TUI8	Parg	poly(ADP-ribose) glycohydrolase;poly(ADP-ribose) glycohydrolase;Poly(ADP-ribose) glycohydrolase;poly(ADP-ribose) glycohydrolase (Fragment)	14751.6	15439.4	14376.5	32043.5	28176.4	32268.2	20393.9	17454.6	23714.6
A0A2I3BRX9	A0A2I3BRX9	Ralgapa1	Ral GTPase activating protein, alpha subunit 1	9069.13	9507.36	10554.3	9209.8	9837.08	9729.78	9306.08	8168.24	8400.17
A0A2I3BRZ2;Q3UHQ6	A0A2I3BRZ2;Q3UHQ6	Dop1b	DOP1 leucine zipper like protein B;Protein dopey-2	9240.84	11412.9	11368	3289.35	3070	3881.86	5152.06	3343.53	5636.25
A0A2I3BS41;Q8K0M3;Q9R1Z8	A0A2I3BS41;Q8K0M3;Q9R1Z8	Sorbs3	Sorbin and SH3 domain containing 3;Sorbin and SH3 domain containing 3;Vinexin	7619.15	6197.08	6642.2	12746.5	11189.4	10722.2	6656.79	4488.55	7064.37
A0A2K6EDJ7;A6X935;E9PVD2;E9Q5L2	A0A2K6EDJ7;A6X935;E9PVD2;E9Q5L2	Itih4	Inter alpha-trypsin inhibitor, heavy chain 4;Inter alpha-trypsin inhibitor, heavy chain 4;Inter alpha-trypsin inhibitor, heavy chain 4;Inter alpha-trypsin inhibitor, heavy chain 4	2121.99	1104.2	1080.27	1414.94	1639.95	2140.32	895.493	2544.03	1602.29
A0A2K6EDK3;Q6PIP5;Q8BJK0	A0A2K6EDK3;Q6PIP5;Q8BJK0	Nudcd1	NudC domain-containing protein 1			1.10931	1				0.235565
A0A2R8VH96;Q8BJ34	A0A2R8VH96;Q8BJ34	Marf1	Meiosis regulator and mRNA stability 1;Meiosis regulator and mRNA stability factor 1	8588.95	9726.12	7017.74	3465.92	1695.92	1716.06	2684.38	1286.86	2520.84
A0A2R8VHB6	A0A2R8VHB6	Epb41l1	Erythrocyte membrane protein band 4.1 like 1 (Fragment)				4.68927
A0A2R8VHD0;A0A2R8VI39;A0A2R8W6P6;P23591;Q5HZI6	A0A2R8VHD0;A0A2R8VI39;A0A2R8W6P6;P23591;Q5HZI6	Gfus	GDP-L-fucose synthase	1087.56		409.384	1672	800.206	680.743
A0A2R8VHH0;K7Q7T7;P63001;Q05144;Q3TLP8;Q8BPG5;Q8C4N8;Q9D859	A0A2R8VHH0;K7Q7T7;P63001;Q05144;Q3TLP8;Q8BPG5;Q8C4N8;Q9D859	Rac2;Rac1;Rac1;Rac2;Rac1;Rac1;Rac1;Rac1	Rac family small GTPase 2 (Fragment);RAS-related C3 botulinum substrate 1;Ras-related C3 botulinum toxin substrate 1;Ras-related C3 botulinum toxin substrate 2;Rac family small GTPase 1;Ras-related C3 botulinum toxin substrate 1;Ras-related C3 botulinum toxin substrate 1 (Fragment);Ras-related C3 botulinum toxin substrate 1	13356.2	17284.1	15550.6	7177.25	3816.92	6089.98	4261.95	3079.45	4179.86
A0A2R8VHM0;E0CYQ0;F7B6A4;F7C1U0	A0A2R8VHM0;E0CYQ0;F7B6A4;F7C1U0	Kctd17	Potassium channel tetramerisation domain containing 17 (Fragment);Potassium channel tetramerisation domain containing 17;Potassium channel tetramerisation domain containing 17 (Fragment);Potassium channel tetramerisation domain containing 17 (Fragment)	2150.3								1699.87
A0A2R8VHQ0;Q8CGB6	A0A2R8VHQ0;Q8CGB6	Tns2	Tensin 2;Tensin-2	47333	51385.4	53718.6	32639.1	30698.2	30808.5	29109.3	35645.7	24108.3
A0A2R8VHV1;A0A2R8VKH6;A0A5S8DHC4;Q63ZX6;Q6P7V2;Q8CCJ9	A0A2R8VHV1;A0A2R8VKH6;A0A5S8DHC4;Q63ZX6;Q6P7V2;Q8CCJ9	Phf20l1	PHD finger protein 20-like protein 1;PHD finger protein 20-like protein 1;PHD finger protein 20-like protein 1;PHD finger protein 20-like protein 1 (Fragment);PHD finger protein 20-like protein 1 (Fragment);PHD finger protein 20-like protein 1	6066.18	8266.16	9967.63	11735	11321.1	11443	10151.5	8918.65	9505.08
A0A2R8VHW2;Q1PG84;Q3TAJ5;Q3TGI9;Q3TH37;Q3TLJ3;Q3TS64;Q3UL54;Q8BVY0;Q9CSF9	A0A2R8VHW2;Q1PG84;Q3TAJ5;Q3TGI9;Q3TH37;Q3TLJ3;Q3TS64;Q3UL54;Q8BVY0;Q9CSF9	Rsl1d1	Ribosomal L1 domain containing 1 (Fragment);PBK1;Ribosomal L1 domain-containing protein 1;Ribosomal L1 domain-containing protein 1;Ribosomal L1 domain-containing protein 1;Ribosomal L1 domain-containing protein 1;Ribosomal L1 domain-containing protein 1;Ribosomal L1 domain-containing protein 1;Ribosomal L1 domain-containing protein 1;Ribosomal L1 domain-containing protein 1 (Fragment)	11641.1	8080.84	10193.2	6457.12	5569.02	5947.36		1270.78	3120.36
A0A2R8VHX5;Q8VD12	A0A2R8VHX5;Q8VD12	Zfp385a;Znf385a	Zinc finger protein 385A	18777.6	20168.4	16900.8	3857.78	2850.43		1568.88	3406.97	2135.83
A0A2R8VI72;Q3TB03;Q8R0H9	A0A2R8VI72;Q3TB03;Q8R0H9	Gga1	Golgi associated, gamma adaptin ear containing, ARF binding protein 1;ADP-ribosylation factor-binding protein GGA1 (Fragment);ADP-ribosylation factor-binding protein GGA1	4637.95	5423.94	4100.46		2056.62	3282.97	2022.78	1866.11	368.255
A0A2R8VJW4;Q8CI96	A0A2R8VJW4;Q8CI96	Clip4	CAP-GLY domain containing linker protein family, member 4;CAP-Gly domain-containing linker protein 4	9980.23	12971.7	13396.3	13794.3	15514.8	13412.9	12333.8	10557.6	18727.8
A0A2R8VK26;D3Z4A3;D3Z4S9;D3Z606;D3Z6P2;Q6NZQ6	A0A2R8VK26;D3Z4A3;D3Z4S9;D3Z606;D3Z6P2;Q6NZQ6	Zfp740;Zfp740;Zfp740;Zfp740;Zfp740;Znf740	Zinc finger protein 740 (Fragment);Zinc finger protein 740 (Fragment);Zinc finger protein 740;Zinc finger protein 740 (Fragment);Zinc finger protein 740 (Fragment);Zinc finger protein 740	98727.5	98397.3	79553.3	138534	150782	130527	129812	134371	127843
A0A2R8VKL5;E9Q066;G3X9Q6;Q3UT02;Q8BWW4	A0A2R8VKL5;E9Q066;G3X9Q6;Q3UT02;Q8BWW4	Larp4	La ribonucleoprotein 4;La ribonucleoprotein 4;La ribonucleoprotein 4;HTH La-type RNA-binding domain-containing protein;La-related protein 4	31683.1	27999.1	34020.1	17852.1	16472.4	13378.1	14270.7	16800.4	14172.7
A0A2R8VKS6;Q8BMZ7;Q9D1C8	A0A2R8VKS6;Q8BMZ7;Q9D1C8	Vps28	Vacuolar protein sorting-associated protein 28 homolog			3371.7	1172.87
A0A2R8W6G4;Q8BGT6	A0A2R8W6G4;Q8BGT6	Micall1	Microtubule associated monooxygenase, calponin and LIM domain containing -like 1;MICAL-like protein 1	2901.86	8050.34	1002.88	3678.36	1399.59	2449.08		737.085	2027.41
A0A2R8W6N3;E9Q0A7;Q4KMM3	A0A2R8W6N3;E9Q0A7;Q4KMM3	Oxr1	Oxidation resistance 1;Oxidation resistance 1;Oxidation resistance protein 1	46470.6	38736.4	36469	19154.4	22447.5	22966.7	33665.9	40221.3	35859.2
A0A2R8W6R6;G3X981;G5E846;P15331	A0A2R8W6R6;G3X981;G5E846;P15331	Prph	Peripherin	22870.2	28100.7	25976.4	26008.6	21341.9	24921	36779.3	29423.8	29718.9
A0A2R8W734;Q99KC7	A0A2R8W734;Q99KC7	Smagp	Small cell adhesion glycoprotein				2306.13	1663.11	2119.9
A0A2U3TZF4;B2RPW2;Q8BGV8	A0A2U3TZF4;B2RPW2;Q8BGV8	Mief1	Mitochondrial elongation factor 1;Smith-Magenis syndrome chromosome region, candidate 7-like (Human);Mitochondrial dynamics protein MID51	44135.2	47690.9	40104.9	22822.1	24187.8	24239.3	54864.6	45788.4	50152
A0A2X0SFE2;H3BJ40;H3BJ45;H3BJU7;H3BKH9;Q60875	A0A2X0SFE2;H3BJ40;H3BJ45;H3BJU7;H3BKH9;Q60875	ARHGEF2;Arhgef2;Arhgef2;Arhgef2;Arhgef2;Arhgef2	Rho guanine nucleotide exchange factor 2 (Fragment);Rho guanine nucleotide exchange factor 2;Rho guanine nucleotide exchange factor 2;Rho guanine nucleotide exchange factor 2;Rho guanine nucleotide exchange factor 2;Rho guanine nucleotide exchange factor 2	31209.7	32810.3	63587.5	15553.3	16355.7	28748.8	10252.8	10517.5	12063.8
A0A2X0SFE3;Q07139;Q8C9Y7	A0A2X0SFE3;Q07139;Q8C9Y7	ECT2;Ect2;Ect2	ECT2 (Fragment);Protein ECT2;Protein ECT2	1771.28			5951.4	6162.48	6242.9	7097.87	8897.27	7951.16
A0A2X0SZ45;Q91Z67	A0A2X0SZ45;Q91Z67	SRGAP2;Srgap2	SRGAP2 (Fragment);SLIT-ROBO Rho GTPase-activating protein 2	8360.44	6432.84	7909.14	7638.77	7481.11	6898.32	6184.33	6687.5	7962.94
A0A2X0U2A7;A0A571BG95;Q5SSL4	A0A2X0U2A7;A0A571BG95;Q5SSL4	Abr	Active breakpoint cluster region-related protein (Fragment);Active breakpoint cluster region-related protein;Active breakpoint cluster region-related protein	3192.69	3329.03	2224.58	5178.33	3214.99	5660.64	618.895	2638.22	2574.8
A0A2X0U2D8;E9QMX7;Q640N3	A0A2X0U2D8;E9QMX7;Q640N3	ARHGAP30;Arhgap30;Arhgap30	ARHGAP30 (Fragment);Rho GTPase activating protein 30;Rho GTPase-activating protein 30	21702.4	25700.5	26275	13302.5	13760.1	17803.7	7361.39	6842.52	10375.4
A0A2X0U2I4;A2AF47;A2AF67	A0A2X0U2I4;A2AF47;A2AF67	DOCK11;Dock11;Dock11	DOCK11;Dedicator of cytokinesis protein 11;Dedicator of cytokinesis 11	3796.56	4111.92	4518.16	4249.42	2523.34	4440.92	2646.81	4467.94	3840.38
A0A2Z4SYE1;A0A494B9G5;O19455;P14483;Q31182;Q3TD53;Q7YQ01;Q7YQ02;Q8BPA0;Q9TP17	A0A2Z4SYE1;A0A494B9G5;O19455;P14483;Q31182;Q3TD53;Q7YQ01;Q7YQ02;Q8BPA0;Q9TP17	H2-Ab1;H2-Ab1;;H2-Ab1;;H2-Ab1;H2-Ab1;H2-Ab1;H2-Ab1;Rmcs1	MHC class II antigen A beta 1 (Fragment);Histocompatibility 2, class II antigen A, beta 1 (Fragment);Major histocompatibility complex class II beta chain (Fragment);H-2 class II histocompatibility antigen, A beta chain;MHC H2-IA-beta-1 (Bm12) chain (Fragment);Ig-like domain-containing protein;MHC class II antigen A beta (Fragment);MHC class II antigen A beta (Fragment);Ig-like domain-containing p…	60735.9	74149.9	48834.5			31785.8		41019.7	39457.2
A0A338P675;A2RS58;P47941	A0A338P675;A2RS58;P47941	Crkl	V-crk avian sarcoma virus CT10 oncogene homolog-like (Fragment);V-crk sarcoma virus CT10 oncogene homolog (Avian)-like;Crk-like protein	55525.8	44314	44950.9	34637.5	29122.5	29051	5655.81	10377.4	7372.72
A0A338P692	A0A338P692	Ahsg	Alpha-2-HS-glycoprotein (Fragment)	5004.53	5387.21	3666.68	2176.11	1096.58		3130.2
A0A338P695;A0A338P6S3;Q6ZPR5	A0A338P695;A0A338P6S3;Q6ZPR5	Smpd4	Sphingomyelin phosphodiesterase 4		1919.22	1100.96	1744.76	3000.53	5422.84	213.633		2127.47
A0A338P697;B9EKJ4;Q3TUF7	A0A338P697;B9EKJ4;Q3TUF7	Yeats2	YEATS domain containing 2 (Fragment);Yeats2 protein;YEATS domain-containing protein 2	17344.7	28574.3	24417	50563.4	47511.1	55457.1	41463.8	42964	38822.8
A0A338P6D4;E9Q7X6	A0A338P6D4;E9Q7X6	Heg1	Heart development protein with EGF-like domains 1;Protein HEG homolog 1	4844.39	2430.21	2810.53	2457.65	2636.75	3272.61	1646.47	3010.61	1887.74
A0A338P6E5;A0A338P6I6;G3UZL5;Q62108	A0A338P6E5;A0A338P6I6;G3UZL5;Q62108	Dlg4	Discs large MAGUK scaffold protein 4;Discs large MAGUK scaffold protein 4;Discs large MAGUK scaffold protein 4;Disks large homolog 4	5059.97	4425.24	3526.84	1958.51	1951.8	1818.89		1633.79
A0A338P6E8;P17095;Q3TVP0;Q566K0	A0A338P6E8;P17095;Q3TVP0;Q566K0	Hmga1;Hmga1;;Hmga1	High mobility group AT-hook 1;High mobility group protein HMG-I/HMG-Y;High mobility group protein HMG-I/HMG-Y;High mobility group AT-hook 1	18120.4	23313	18440.6	35875.2	33374.3	42007.1	23735.8	19225.5	12723.6
A0A338P6F2;G5E8A0;Q8CI95	A0A338P6F2;G5E8A0;Q8CI95	Osbpl11	Oxysterol-binding protein;Oxysterol-binding protein;Oxysterol-binding protein-related protein 11	167086	164842	206604	180906	206720	168103	161448	165874	170914
A0A338P6F7;G5E843	A0A338P6F7;G5E843	Robo1	Roundabout guidance receptor 1 (Fragment);Roundabout guidance receptor 1	3569.53	4003.15	1384.89	7694.96	5343.38	5075.28	2773.56	3369.49	3065.03
A0A338P6G9;Q3UU67	A0A338P6G9;Q3UU67	Trat1	T cell receptor associated transmembrane adaptor 1;T-cell receptor-associated transmembrane adapter 1	4046.11		3713.94
A0A338P6J8;A0A338P790;Q91ZX6	A0A338P6J8;A0A338P790;Q91ZX6	Senp2	SUMO/sentrin specific peptidase 2;SUMO/sentrin specific peptidase 2;Sentrin-specific protease 2	1285.98	1124.62	3080.39	2212.46	1494.94	1918.35		6119.42	10464.1
A0A338P6J9;P51125;Q8CE80	A0A338P6J9;P51125;Q8CE80	Cast	Calpastatin (Fragment);Calpastatin;Calpastatin	85305	76457.4	81042.7	33477.8	31752.8	36316.5	47075.8	53365.5	46642.2
A0A338P6K2	A0A338P6K2	Myh11	Myosin, heavy polypeptide 11, smooth muscle	17933.9	17312.5	17562.9	7420.07	7098.59	7740.46	10471.9	11118	10778.7
A0A338P6K3;Q3UJ69;Q548L0;Q61624;Q8CB43	A0A338P6K3;Q3UJ69;Q548L0;Q61624;Q8CB43	Zfp148;Zfp148;Zfp148;Znf148;Zfp148	Zinc finger protein 148;C2H2-type domain-containing protein;G-rich box-binding protein Berf-1;Zinc finger protein 148;C2H2-type domain-containing protein	51905.2	51432.5	53243.7	42092.3	45663.3	40306.1	38183.6	50924.4	47830.9
A0A338P6K9	A0A338P6K9	Qser1	Glutamine and serine-rich protein 1			2077.24	5690.05	15651.7	12379.9	3401.8	5169.94	6459.31
A0A338P6L5;A0A338P774;Q8K268	A0A338P6L5;A0A338P774;Q8K268	Abcf3	ATP-binding cassette, sub-family F (GCN20), member 3 (Fragment);ATP-binding cassette, sub-family F (GCN20), member 3 (Fragment);ATP-binding cassette sub-family F member 3					585.578	2565.2		6759	71.2472
A0A338P6N4	A0A338P6N4	Crybg3	Beta-gamma crystallin domain containing 3	38679.4	32433.5	29054.3	49463	40471.9	49475.2	45772.6	42466.1	38735.9
A0A338P6P6;D4AFX6;Q6ZQK5	A0A338P6P6;D4AFX6;Q6ZQK5	Acap2	Arf-GAP with coiled-coil, ANK repeat and PH domain-containing protein;Arf-GAP with coiled-coil, ANK repeat and PH domain-containing protein;Arf-GAP with coiled-coil, ANK repeat and PH domain-containing protein 2	21304.9	20458.2	21080.9	12766.9	13560	12781.1	15172.3	11866.9	12559.6
A0A338P6R8;A0A338P729;A0A338P755;A0A338P769;B7ZNM7;Q52KH2;Q9Z2Q6	A0A338P6R8;A0A338P729;A0A338P755;A0A338P769;B7ZNM7;Q52KH2;Q9Z2Q6	Gm49601;Septin5;Septin5;Septin5;Septin5;Septin5;Septin5	Septin;Septin 5;Septin 5 (Fragment);Septin;Septin;Sept5 protein (Fragment);Septin-5				1
A0A338P6S4;Q6GQU0	A0A338P6S4;Q6GQU0	2510009E07Rik;	RIKEN cDNA 2510009E07 gene (Fragment);UPF0524 protein C3orf70 homolog		8129.75	4988.56			464.496			8286.52
A0A338P6S8;Q59IW5;Q59IW6;Q59IW7;Q59IW9	A0A338P6S8;Q59IW5;Q59IW6;Q59IW7;Q59IW9	Abi3bp	ABI family member 3 binding protein	38449.4	93663	38452.3	12999.9	15548.2	15108.7	6960.25	6660.57	9143.22
A0A338P6U8;A0A8Q0PK87;E9Q4N6;E9Q4N7;E9Q6R4	A0A338P6U8;A0A8Q0PK87;E9Q4N6;E9Q4N7;E9Q6R4	Arid1b	AT rich interactive domain 1B (SWI-like);AT rich interactive domain 1B (SWI-like);AT rich interactive domain 1B (SWI-like);AT-rich interactive domain-containing protein 1B;AT rich interactive domain 1B (SWI-like)	31684.1	62728.1	50005.3	58450.7	85932.2	73464.7	37081.7	29601	44754.7
A0A338P6W1;P97868	A0A338P6W1;P97868	Rbbp6	Retinoblastoma binding protein 6, ubiquitin ligase (Fragment);E3 ubiquitin-protein ligase RBBP6	39481.2	33159.4	34146.3	27234.4	26726	25560.3	26634.4	28352.1	31240.6
A0A338P730;A0JLM5;E9Q7C1;Q3TE00;Q3TLG6;Q6KAM1;Q7TQE1;Q80UN2;Q924H2	A0A338P730;A0JLM5;E9Q7C1;Q3TE00;Q3TLG6;Q6KAM1;Q7TQE1;Q80UN2;Q924H2	Med15	Mediator of RNA polymerase II transcription subunit 15;Mediator of RNA polymerase II transcription subunit 15 (Fragment);Mediator of RNA polymerase II transcription subunit 15;Mediator of RNA polymerase II transcription subunit 15;Mediator of RNA polymerase II transcription subunit 15;Mediator of RNA polymerase II transcription subunit 15 (Fragment);Mediator of RNA polymerase II transcription sub…	9215.2	21780.8	7591.55	4566.3	4299.71	4144.35	3342.25	2484.64	3881.35
A0A338P786;A0A338P7E5;P68037;Q3TIH9;Q561N4	A0A338P786;A0A338P7E5;P68037;Q3TIH9;Q561N4	Ube2l3	Ubiquitin-conjugating enzyme E2L 3 (Fragment);Ubiquitin-conjugating enzyme E2L 3;Ubiquitin-conjugating enzyme E2 L3;UBC core domain-containing protein;Ubiquitin-conjugating enzyme E2L 3	1441.73	1270.4	1316.97	1722.49	792.788	1674.7	795.615	781.498	705.119
A0A338P7C0;O09061;Q6RI64	A0A338P7C0;O09061;Q6RI64	Psmb1	Proteasome (prosome, macropain) subunit, beta type 1;Proteasome subunit beta type-1;Proteasome subunit beta	2531.48	4146.53	3018.09	2189.43	1657.16	1517.01	1595.98	907.743	2862.13
A0A338P7D2;Q80X54;Q91YJ2	A0A338P7D2;Q80X54;Q91YJ2	Snx4;;Snx4	Sorting nexin 4;Snx4 protein;Sorting nexin-4	5651.12	4317.33	4876.01	6786.56	5956.21	7319.9	10752.9	9028.56	9630.08
A0A338P7L3;H3BLR8;I1E4X7;Q9JI46	A0A338P7L3;H3BLR8;I1E4X7;Q9JI46	Nudt3	Nudix (nucleotide diphosphate linked moiety X)-type motif 3;diphosphoinositol-polyphosphate diphosphatase;diphosphoinositol-polyphosphate diphosphatase;Diphosphoinositol polyphosphate phosphohydrolase 1	189.586		858.85		256.025				386.367
A0A346I7J8;A0A7G9TMG6;B7U9H2;Q0VGN5;Q1W5W7;Q61705;Q61706;Q78E13;Q7TQ37;Q8C2B1	A0A346I7J8;A0A7G9TMG6;B7U9H2;Q0VGN5;Q1W5W7;Q61705;Q61706;Q78E13;Q7TQ37;Q8C2B1	gag-pol;pol;;BC094435;gag-pol;;;;pol;	Putative gag-pol protein;Pol;LCMV-GP/IAP-pol fusion protein;BC094435 protein (Fragment);Putative gag-pol protein;RNA-directed DNA polymerase (Fragment);RNA-directed DNA polymerase;RNA-directed DNA polymerase (Fragment);Pol protein;Uncharacterized protein	3421.36		3982.13	2844.43	2212.6	1623.08	5398.66	2578.7	3130.44
A0A384DV91;P35175	A0A384DV91;P35175	Stfa1	Stefin A1;Stefin-1							1737.77
A0A384DVB1;Q3TYF2;Q543Y7;Q61644	A0A384DVB1;Q3TYF2;Q543Y7;Q61644	Pacsin1	Protein kinase C and casein kinase substrate in neurons 1 (Fragment);Protein kinase C and casein kinase substrate in neurons protein 1;Protein kinase C and casein kinase substrate in neurons protein 1;Protein kinase C and casein kinase substrate in neurons protein 1			1475.44		1280.86	1717.97		1541.08
A0A3B0J1H7;E9PWU4;Q60994;Q8BRW2	A0A3B0J1H7;E9PWU4;Q60994;Q8BRW2	Adid;Adipoq;Adipoq;Adipoq	Adiponectin d;Adiponectin, C1Q and collagen domain containing (Fragment);Adiponectin;C1q domain-containing protein	4902.42	2662.22	4819.48	10557.7	8721.77	9710.01	28302.5		4042.92
A0A3B2W3F6;E9PY46;E9Q682;Q3TQ94;Q6ZQ91	A0A3B2W3F6;E9PY46;E9Q682;Q3TQ94;Q6ZQ91	Ift140	Intraflagellar transport 140;Intraflagellar transport protein 140 homolog;Intraflagellar transport 140 (Fragment);Intraflagellar transport protein 140 homolog (Fragment);MKIAA0590 protein (Fragment)							4409.81
A0A3B2W3M7;P18608;Q8CEW1	A0A3B2W3M7;P18608;Q8CEW1	Hmgn1	High mobility group nucleosomal binding domain 1;Non-histone chromosomal protein HMG-14;Non-histone chromosomal protein HMG-14	18950	32772.9	167087	9519.85		5197.56	204592	27613.5
A0A3B2W3T2;A0A3B2WCP8;A0A3B2WCX7;A0A3B2WD38;A0A3B2WD39;B2KF05	A0A3B2W3T2;A0A3B2WCP8;A0A3B2WCX7;A0A3B2WD38;A0A3B2WD39;B2KF05	Brpf3	Bromodomain and PHD finger containing, 3;Bromodomain and PHD finger containing, 3 (Fragment);Bromodomain and PHD finger containing, 3;Bromodomain and PHD finger containing, 3;Bromodomain and PHD finger containing, 3;Bromodomain and PHD finger-containing protein 3	3453.81	1044.98	514.904	1313.03			2225.59	1901.49
A0A3B2W3V4;A0A3B2WB82;Q9JK23	A0A3B2W3V4;A0A3B2WB82;Q9JK23	Psmg1	Proteasome assembly chaperone 1	3724.01	5274.62	2718.72	1578.48	628.926	1174.16	2475.65	912.076	1764.16
A0A3B2W4E4;A0A3B2WB50;D0ESZ4;Q3TBC8;Q3TBD3;Q3TCC1;Q3TDB5;Q3TDP9;Q3U1J9;Q8K482	A0A3B2W4E4;A0A3B2WB50;D0ESZ4;Q3TBC8;Q3TBD3;Q3TCC1;Q3TDB5;Q3TDP9;Q3U1J9;Q8K482	Emilin2	Elastin microfibril interfacer 2;Elastin microfibril interfacer 2;Elastin microfibril interfacer 2;EMILIN-2;EMILIN-2;EMILIN-2;EMI domain-containing protein (Fragment);Elastin microfibril interfacer 2;Elastin microfibril interfacer 2;EMILIN-2	24054	24520.6	23423.3	27626.3	26679.4	25731.2	25434	23042.5	25152.9
A0A3B2W4I2;A0A3B2WCC1;A0A3F2YNL8;Q3TWT2;Q91VH6	A0A3B2W4I2;A0A3B2WCC1;A0A3F2YNL8;Q3TWT2;Q91VH6	Memo1	Protein MEMO1;Protein MEMO1 (Fragment);Protein MEMO1;Protein MEMO1;Protein MEMO1	4171.07	5121.51	3626.18	1840.25	1160.52	2147.47	2961.04	2168.4	1717.81
A0A3B2W7H4;A0A3B2WAQ7;P59672;Q3UHP6	A0A3B2W7H4;A0A3B2WAQ7;P59672;Q3UHP6	Anks1;Anks1;Anks1a;Anks1	Ankyrin repeat and SAM domain containing 1;Ankyrin repeat and SAM domain containing 1;Ankyrin repeat and SAM domain-containing protein 1A;Ankyrin repeat and SAM domain containing 1	7967.01	14452.6	17105.7	23921.6	22170.6	24285.3	7666.96	10056.1	11862
A0A3B2W7H8;Q8C547	A0A3B2W7H8;Q8C547	Heatr5b	HEAT repeat containing 5B;HEAT repeat-containing protein 5B		7698.55	5240.19	5180.99	4883.73	6041.27	7885.78	6515.92	6876.55
A0A3B2W7K0;Q3TJB4;Q3TRJ7;Q3U3C4;Q62419	A0A3B2W7K0;Q3TJB4;Q3TRJ7;Q3U3C4;Q62419	Sh3gl1	SH3-domain GRB2-like 1;Endophilin-A2;SH3-domain GRB2-like 1;Endophilin-A2;Endophilin-A2				776.487
A0A3B2W812;Q9JLQ0	A0A3B2W812;Q9JLQ0	Cd2ap	CD2-associated protein	12733.7	13322	15227.2	13330.5	13434.1	13547	17326.1	11061	11219.8
A0A3B2WAS4;Q3UIB2;Q9Z1B7	A0A3B2WAS4;Q3UIB2;Q9Z1B7	Mapk13	mitogen-activated protein kinase (Fragment);Mitogen-activated protein kinase 13;Mitogen-activated protein kinase 13	1158.17	1712.47	2029.3	1542.76	6387.07	446.588	2610.38	16031.5	3115.17
A0A3B2WBC6	A0A3B2WBC6	Polr2m	Polymerase (RNA) II (DNA directed) polypeptide M					1527.6	539.832	309.829
A0A3B2WBE1	A0A3B2WBE1	Epb41l3	Erythrocyte membrane protein band 4.1 like 3 (Fragment)	13896.6	15215.6	16948.1	10436.4	4791.2	9784.98	8405.19	4026.36	4668.5
A0A3B2WBF0;P09671;Q3U8W4;Q4FJX9	A0A3B2WBF0;P09671;Q3U8W4;Q4FJX9	Sod2	Superoxide dismutase;Superoxide dismutase [Mn], mitochondrial;Superoxide dismutase;Superoxide dismutase	6626	6306.83	5952.57	2205.4	1938.36	2915.94	991.538	1126.31	1025.99
A0A3B2WBH9;A0A3B2WCN9;Q9Z0U1	A0A3B2WBH9;A0A3B2WCN9;Q9Z0U1	Tjp2	Tight junction protein 2;Tight junction protein 2;Tight junction protein ZO-2	264311	233856	295949	175000	198074	180202	141071	138740	128567
A0A3B2WBL1;A0A3B2WDD2;P53026;Q3U561;Q5XJF6	A0A3B2WBL1;A0A3B2WDD2;P53026;Q3U561;Q5XJF6	Rpl10a	Ribosomal protein;Ribosomal protein;Large ribosomal subunit protein uL1;Ribosomal protein;Ribosomal protein	2098.27	3552.23	2830.74	1413.92	2254.84	1447.93	2177.72	1586.74	1140.14
A0A3B2WCC4;Q99JX1	A0A3B2WCC4;Q99JX1	Taf11	TATA-box binding protein associated factor 11;Transcription initiation factor TFIID subunit 11	19974.5	20484	19379.5	7639.64	5397.88	7969.77	4384.74	5613.76	4457.98
A0A3B2WCD8;Q3U0V1	A0A3B2WCD8;Q3U0V1	Khsrp	KH-type splicing regulatory protein;Far upstream element-binding protein 2	20059.2	21140.8	17336.8	23227.5	17617.8	23862	13989.9	17022.9	15131.9
A0A3B2WCL5;Q9CT10	A0A3B2WCL5;Q9CT10	Ranbp3	RAN binding protein 3;Ran-binding protein 3	273835	281980	284133	212004	226526	189053	130825	109017	127256
A0A3B2WCS4;A6H6B3;B7ZNM1;Q3TX60;Q3ULP3;Q62172	A0A3B2WCS4;A6H6B3;B7ZNM1;Q3TX60;Q3ULP3;Q62172	Ralbp1	RalA binding protein 1;RalA binding protein 1;Ralbp1 protein;Rho-GAP domain-containing protein;Rho-GAP domain-containing protein;RalA-binding protein 1	67418.8	76162.3	66171.7	34442.9	36680.7	38845	16092.2	24773.1	20217.2
A0A3F2YNR7;P70210;Q9Z0P8	A0A3F2YNR7;P70210;Q9Z0P8	Tead3;Tead3;TEF-5	Transcriptional enhancer factor TEF-5	40440.9	38710.9	36761.3	41962.1	39859.5	43370.1	54796.6	48390.2	43043.8
A0A3P9AQ15;Q8CI52	A0A3P9AQ15;Q8CI52	Gramd1c	GRAM domain containing 1C;Protein Aster-C	9514.61	20551.5	29004.6	7148.29	5897.64	7549.02	4675.11	7277.75	8912.07
A0A3Q4EBK4;O08539;Q6P1B9	A0A3Q4EBK4;O08539;Q6P1B9	Bin1	Bridging integrator 1;Myc box-dependent-interacting protein 1;Bin1 protein	485163	491588	422216	522891	505224	512185	534234	586671	562192
A0A3Q4EBT8;A0A3Q4EC24;A0A3Q4EG99;A0A3Q4EGL4;A0A3Q4EIA3;D3YXC2;Q791T5	A0A3Q4EBT8;A0A3Q4EC24;A0A3Q4EG99;A0A3Q4EGL4;A0A3Q4EIA3;D3YXC2;Q791T5	Mtch1	Mitochondrial carrier 1;Mitochondrial carrier 1 (Fragment);Mitochondrial carrier 1;Mitochondrial carrier 1 (Fragment);Mitochondrial carrier 1 (Fragment);Mitochondrial carrier 1 (Fragment);Mitochondrial carrier homolog 1			1174.96	1792.45	423.825	4151.3	2101.52
A0A3Q4EBV9;A0A3Q4EH87;A0A3Q4EHZ1;D3Z491;Q9DBC3	A0A3Q4EBV9;A0A3Q4EH87;A0A3Q4EHZ1;D3Z491;Q9DBC3	Cmtr1	Cap-specific mRNA (nucleoside-2'-O-)-methyltransferase 1 (Fragment);Cap-specific mRNA (nucleoside-2'-O-)-methyltransferase 1 (Fragment);Cap-specific mRNA (nucleoside-2'-O-)-methyltransferase 1 (Fragment);Cap methyltransferase 1 (Fragment);Cap-specific mRNA (nucleoside-2'-O-)-methyltransferase 1	812.093	2177.74	8727.55	3121.02	1969.78	3497.05		8488.38	8717.69
A0A3Q4EBZ1;A0A3Q4EI83;E0CYT5;H7BX52;Q571A2;Q9D4H8	A0A3Q4EBZ1;A0A3Q4EI83;E0CYT5;H7BX52;Q571A2;Q9D4H8	Cul2	Cullin 2;Cullin 2;Cullin 2 (Fragment);Cullin 2;MKIAA4106 protein (Fragment);Cullin-2	454.166	2042.26	1586.18	588.87	350.29		858.054		30.109
A0A3Q4EBZ8;Q8BSI5;Q9CZB3	A0A3Q4EBZ8;Q8BSI5;Q9CZB3	Thumpd2	THUMP domain containing 2;THUMP domain-containing protein;THUMP domain-containing protein 2	14676.9	18343.5	17814.8	24609.2	25818.5	29867.4	19407.4	20837.7	21536.5
A0A3Q4EC12;A0A3Q4L314;O55091	A0A3Q4EC12;A0A3Q4L314;O55091	Impact	Protein IMPACT (Fragment);Impact, RWD domain protein (Fragment);Protein IMPACT	13128.2	9591.64	14353.8	4975.54	5210.38	7731.24	3739.34	1806.18	1053.79
A0A3Q4EG41;A0A3Q4EG54;A0A3Q4EI24;D3YZ66;D3Z754;D3Z7I9;Q3UZK3;Q3V156;Q91XL9	A0A3Q4EG41;A0A3Q4EG54;A0A3Q4EI24;D3YZ66;D3Z754;D3Z7I9;Q3UZK3;Q3V156;Q91XL9	Osbpl1a	Oxysterol binding protein-like 1A;Oxysterol-binding protein;Oxysterol-binding protein;Oxysterol binding protein-like 1A (Fragment);Oxysterol-binding protein (Fragment);Oxysterol-binding protein (Fragment);Oxysterol-binding protein;Oxysterol-binding protein;Oxysterol-binding protein-related protein 1	2582.76	3724.56	2434.64	2016.68	1717.46	1997.47	1981.93	3719.25	2790.05
A0A3Q4EG48;E9Q6T9;Q5M956	A0A3Q4EG48;E9Q6T9;Q5M956	Kctd1	Potassium channel tetramerisation domain containing 1 (Fragment);Potassium channel tetramerisation domain containing 1;BTB/POZ domain-containing protein KCTD1			286.647	159.813	388.729	445.603	1024.33	347.306	518.813
A0A3Q4EGD8;Q3TSL0;Q6P236;Q8BRC5;Q8K1G7;Q8K4P0;Q9D1P6	A0A3Q4EGD8;Q3TSL0;Q6P236;Q8BRC5;Q8K1G7;Q8K4P0;Q9D1P6	Wdr33	WD repeat domain 33;Uncharacterized protein;Wdr33 protein;Uncharacterized protein;WD repeat domain 33;pre-mRNA 3' end processing protein WDR33;WD repeat domain 33	76162.8	90073.5	72718.5	124279	115086	112917	125892	135587	116429
A0A3Q4EGS7;A0A3Q4EH67;D3Z6D5;Q3TN06;Q3U049;Q6P395;Q6TYB5	A0A3Q4EGS7;A0A3Q4EH67;D3Z6D5;Q3TN06;Q3U049;Q6P395;Q6TYB5	Fez2	Fasciculation and elongation protein zeta 2 (zygin II);Fasciculation and elongation protein zeta 2 (zygin II);Fasciculation and elongation protein zeta 2 (zygin II);Fasciculation and elongation protein zeta 2 (zygin II);Fasciculation and elongation protein zeta-2;Fez2 protein (Fragment);Fasciculation and elongation protein zeta-2	5450.35	8941.45	4645.62	6361.5	3995.8	4514.77	5355.63	5135.61	7435.4
A0A3Q4EGV1;Q3TC66;Q3TJT2;Q3UYW1;Q3V2R6;Q99LR9;Q9CXZ8;Q9DBU3	A0A3Q4EGV1;Q3TC66;Q3TJT2;Q3UYW1;Q3V2R6;Q99LR9;Q9CXZ8;Q9DBU3	Riok3	non-specific serine/threonine protein kinase (Fragment);Serine/threonine-protein kinase RIO3;Serine/threonine-protein kinase RIO3;Serine/threonine-protein kinase RIO3;Serine/threonine-protein kinase RIO3;non-specific serine/threonine protein kinase (Fragment);non-specific serine/threonine protein kinase (Fragment);Serine/threonine-protein kinase RIO3	1310.9					4259.32
A0A3Q4EH50;Q8BY35	A0A3Q4EH50;Q8BY35	Fgd2	FYVE, RhoGEF and PH domain containing 2;FYVE, RhoGEF and PH domain-containing protein 2	78842	82806.1	75768.1	48447.6	47713.2	49180.6	53222.1	45086.9	46208.1
A0A3Q4EHL1;Q80VE5	A0A3Q4EHL1;Q80VE5	Tbc1d22b	TBC1 domain family, member 22B;TBC1 domain family, member 22B	221.345			145.046		304.63
A0A3Q4EHL9;Q3V0N3;Q8JZZ6	A0A3Q4EHL9;Q3V0N3;Q8JZZ6	Ammecr1l	AMME chromosomal region gene 1-like;AMMECR1 domain-containing protein;AMMECR1-like protein	1396.58	1046.1	609.151	6645.74	3788.18	5392.03	4364.64	3209.58	6097.31
A0A3Q4EI12;A0A452J8C1;P35293;Q0PD38	A0A3Q4EI12;A0A452J8C1;P35293;Q0PD38	Rab18	Ras-related protein Rab-18	32211.4	24603.2	26685.1	21374.8	17770.3	15291.1	30070.7	22859.4	11630.6
A0A3Q4L393;Q3THA6;Q8BL97	A0A3Q4L393;Q3THA6;Q8BL97	Srsf7	Serine and arginine-rich splicing factor 7;Serine/arginine-rich splicing factor 7;Serine/arginine-rich splicing factor 7	41193.1	38179.1	30787.4	82490.4	78026.3	76148.2	89670.9	101421	105233
A0A411ACY8;E9Q1X8;O08532;Q14BH8	A0A411ACY8;E9Q1X8;O08532;Q14BH8	Cacna2d1	Voltage-dependent calcium channel alpha2/delta-1 transcript variant 2;Calcium channel, voltage-dependent, alpha2/delta subunit 1;Voltage-dependent calcium channel subunit alpha-2/delta-1;Cacna2d1 protein	34164.7	10836.6	27281.1	8944.18	7374.46	9823.96	21209.6	15549.8	15028.9
A0A411P8U6	A0A411P8U6	Mbp	Myelin basic protein (Fragment)	2995.44		4046.56			645.096			1882.44
A0A494B870;Q6IEE6	A0A494B870;Q6IEE6	Tmem132e	Transmembrane protein 132E	30967.1	1230.72	3988.4	2777.62	4417.99	4282.48			869.694
A0A494B908;A0A494BAW2;P19157	A0A494B908;A0A494BAW2;P19157	Gstp1	Glutathione S-transferase (Fragment);Glutathione S-transferase;Glutathione S-transferase P 1	82255.2	89601.1	74594.7	12118	22797.1	20742.1	31225.9	46795.3	31153.1
A0A494B920;Q5DTH5	A0A494B920;Q5DTH5	Tshz1	Teashirt zinc finger family member 1;Teashirt homolog 1	277.277	1149.18	599.526	378.517		715.71
A0A494B923;A0A494BB18;O88428;Q9QYS0	A0A494B923;A0A494BB18;O88428;Q9QYS0	Papss2;Papss2;Papss2;	3'-phosphoadenosine 5'-phosphosulfate synthase 2;3'-phosphoadenosine 5'-phosphosulfate synthase 2;Bifunctional 3'-phosphoadenosine 5'-phosphosulfate synthase 2;ATP sulfurylase/APS kinase isoform SK2	4422.84	3955.09	4412.52	2084.11	469.422	1310.74	1872.77	3738.91	1046.95
A0A494B946;A0A494B9M3;A0A494B9R7;Q3U4Z0;Q6P541;Q8C726;Q8CDU2;Q9DA12	A0A494B946;A0A494B9M3;A0A494B9R7;Q3U4Z0;Q6P541;Q8C726;Q8CDU2;Q9DA12	Btbd9	BTB (POZ) domain containing 9 (Fragment);BTB/POZ domain-containing protein 9 (Fragment);BTB (POZ) domain containing 9;BTB/POZ domain-containing protein 9;Btbd9 protein;BTB/POZ domain-containing protein 9;BTB/POZ domain-containing protein 9 (Fragment);F5/8 type C domain-containing protein	10403.2	9084.93	11694.5
A0A494B952;Q91V64;Q9D096	A0A494B952;Q91V64;Q9D096	Isoc1	Isochorismatase domain containing 1;Isochorismatase domain-containing protein 1;Isochorismatase-like domain-containing protein
A0A494B953;A0A494B9F0;A0A494BAG2;A0A494BAX0;E9PXB7;G3X9H8;Q3TQK9;Q8CFI0	A0A494B953;A0A494B9F0;A0A494BAG2;A0A494BAX0;E9PXB7;G3X9H8;Q3TQK9;Q8CFI0	Nedd4l	HECT-type E3 ubiquitin transferase;E3 ubiquitin-protein ligase;HECT-type E3 ubiquitin transferase;HECT-type E3 ubiquitin transferase;E3 ubiquitin-protein ligase;E3 ubiquitin-protein ligase;HECT-type E3 ubiquitin transferase (Fragment);E3 ubiquitin-protein ligase NEDD4-like	10641.6	17047.9	9767.27	19236.2	20332.4	22608.1	11019.4	18655.1	14095.6
A0A494B956;P33611;Q3TQB1;Q3U6L8;Q3UZI8;Q8C2T6;Q922M1	A0A494B956;P33611;Q3TQB1;Q3U6L8;Q3UZI8;Q8C2T6;Q922M1	Pola2	Polymerase (DNA directed), alpha 2 (Fragment);DNA polymerase alpha subunit B;DNA polymerase alpha subunit B N-terminal domain-containing protein;DNA polymerase alpha subunit B;DNA polymerase alpha subunit B;DNA polymerase alpha subunit B;Pola2 protein					206.369	123.53
A0A494B982;D3YU09;Q3U0C4;Q548F2;Q69ZN0;Q71RH5;Q71RH6;Q9R111	A0A494B982;D3YU09;Q3U0C4;Q548F2;Q69ZN0;Q71RH5;Q71RH6;Q9R111	Gda	Guanine deaminase;Guanine deaminase;Guanine deaminase;Guanine deaminase;Guanine deaminase (Fragment);Guanine deaminase;Guanine deaminase;Guanine deaminase	2660.87	1121.15	582.549	237.763	243.253	528.255	17.0817	4562.99	659.518
A0A494B9F5;A0A494BAA4;A0A494BAK0;Q8R0W6	A0A494B9F5;A0A494BAA4;A0A494BAK0;Q8R0W6	Ndfip1	Nedd4 family interacting protein 1 (Fragment);Nedd4 family interacting protein 1;Nedd4 family interacting protein 1;NEDD4 family-interacting protein 1	4133.32	4442.65	1957.08		1583.85	2547.37	1752.73
A0A494B9H3;G3X9Y4;P97348;Q545H8	A0A494B9H3;G3X9Y4;P97348;Q545H8	Rhod	Ras homolog family member D;Ras homolog family member D;Rho-related GTP-binding protein RhoD;Rho-related GTP-binding protein RhoD	6597.35	5382.53	6930.57	7669.54	9654	7310.36	6694.74	10485.2	8496.5
A0A494B9I1;A0A494BAG5;Q059U9;Q9DBR0	A0A494B9I1;A0A494BAG5;Q059U9;Q9DBR0	Akap8	A kinase (PRKA) anchor protein 8;A kinase (PRKA) anchor protein 8 (Fragment);A kinase (PRKA) anchor protein 8;A-kinase anchor protein 8	10097.1	12938.3	11446.2	15903.7	17254	19508.2	5404.56	2311.43	4394.49
A0A494B9K4;Q05DT0;Q3UNK1;Q8BJH2;Q9QYB5	A0A494B9K4;Q05DT0;Q3UNK1;Q8BJH2;Q9QYB5	Add3	Adducin 3 (gamma);Add3 protein (Fragment);Class II aldolase/adducin N-terminal domain-containing protein;Class II aldolase/adducin N-terminal domain-containing protein;Gamma-adducin	122882	120698	116038	83553.2	90811.5	77561.9	97679.9	95034.1	98564.2
A0A494B9P3;H7BWY6;Q00724;Q3TF08	A0A494B9P3;H7BWY6;Q00724;Q3TF08	Rbp4	Retinol-binding protein 4 (Fragment);Retinol-binding protein 4;Retinol-binding protein 4;Retinol-binding protein 4 (Fragment)	4766.31	665.223	7501.79	5821.34	3145.18	2156.95		11603.5
A0A494B9Q9;P97329	A0A494B9Q9;P97329	Kif20a	Kinesin-like protein (Fragment);Kinesin-like protein KIF20A				10034.6	7316.22	8645.39		1488.22	828.036
A0A494B9R5;E9Q156;Q9EP82	A0A494B9R5;E9Q156;Q9EP82	Wdr4	WD repeat domain 4 (Fragment);tRNA (guanine-N(7)-)-methyltransferase non-catalytic subunit WDR4;tRNA (guanine-N(7)-)-methyltransferase non-catalytic subunit WDR4	24708.9	20711.6	17742.4	35894.9	32883.3	31835.5	28045.9	26083.9	23432.8
A0A494B9T0;A0A494BAN3;A0A494BAS7;A0A494BBL0;Q8BTV2	A0A494B9T0;A0A494BAN3;A0A494BAS7;A0A494BBL0;Q8BTV2	Cpsf7	Cleavage and polyadenylation specific factor 7 (Fragment);Cleavage and polyadenylation specific factor 7 (Fragment);Cleavage and polyadenylation specific factor 7 (Fragment);Cleavage and polyadenylation specific factor 7;Cleavage and polyadenylation specificity factor subunit 7	17934.5	14997.9	16131.3	8692.52	7361.99	8412.81	10660	13705.2	17242.1
A0A494B9X3;A0A494BBP6;E9Q9M1;Q3V1L4	A0A494B9X3;A0A494BBP6;E9Q9M1;Q3V1L4	Nt5c2	5'-nucleotidase, cytosolic II;5'-nucleotidase, cytosolic II;5'-nucleotidase, cytosolic II;Cytosolic purine 5'-nucleotidase	6659.7	5205.88	8246.34		2977.47		126719	99277.2	92611.8
A0A494B9Z0;A0A494BBA8;P62862;Q3THB2;Q91V99;Q920W8	A0A494B9Z0;A0A494BBA8;P62862;Q3THB2;Q91V99;Q920W8	Fau;Fau;Fau;Fau;fau;fau	40S ribosomal protein S30;Finkel-Biskis-Reilly murine sarcoma virus (FBR-MuSV) ubiquitously expressed (fox derived);Ubiquitin-like FUBI-ribosomal protein eS30 fusion protein;Ubiquitin-like domain-containing protein;Fau protein (Fragment);Fau protein (Fragment)	1055.72	289.689		549.786	435.557	410.945	846.723	2811.61	2121.72
A0A494B9Z3;Q3V1H7;Q99NA9	A0A494B9Z3;Q3V1H7;Q99NA9	Pcgf6	Polycomb group ring finger 6;RING-type domain-containing protein;Polycomb group RING finger protein 6	1641.03	1977.73		900.519		1178.03	1859.55	1977.8
A0A494BA20;A0A494BAE3;A0A494BBF5;D3Z4B2;Q8C1T5;Q9CWZ7	A0A494BA20;A0A494BAE3;A0A494BBF5;D3Z4B2;Q8C1T5;Q9CWZ7	Napg	N-ethylmaleimide sensitive fusion protein attachment protein gamma;N-ethylmaleimide sensitive fusion protein attachment protein gamma;N-ethylmaleimide sensitive fusion protein attachment protein gamma (Fragment);N-ethylmaleimide sensitive fusion protein attachment protein gamma (Fragment);Gamma-soluble NSF attachment protein;Gamma-soluble NSF attachment protein	12461.3	3650.95	804.541	841.015	261.551		387.838
A0A494BA22;B7ZNA7;E9QQ68;Q6A039	A0A494BA22;B7ZNA7;E9QQ68;Q6A039	Tbc1d12	TBC1D12: TBC1 domain family, member 12;Tbc1d12 protein;TBC1D12: TBC1 domain family, member 12;TBC1 domain family member 12				1.42744
A0A494BA33;A0A494BAT0;P01901;Q3TH01;Q3TVI9;Q3UBW0;Q7JJ15;W5XHY0;W5XIT1	A0A494BA33;A0A494BAT0;P01901;Q3TH01;Q3TVI9;Q3UBW0;Q7JJ15;W5XHY0;W5XIT1	H2-K1	Histocompatibility 2, K1, K region (Fragment);Histocompatibility 2, K1, K region;H-2 class I histocompatibility antigen, K-B alpha chain;Histocompatibility 2, K1, K region;Ig-like domain-containing protein;Ig-like domain-containing protein;H2K1(B);MHC class I antigen;MHC class I antigen (Fragment)		1078.63	1652.19		1033.4
A0A494BA44;Q04207;Q3U3Q8;Q548Y4;Q8BTL4	A0A494BA44;Q04207;Q3U3Q8;Q548Y4;Q8BTL4	Rela	V-rel reticuloendotheliosis viral oncogene homolog A (avian);Transcription factor p65;RHD domain-containing protein;Nuclear transcription factor RelA;RHD domain-containing protein	2323.87	2035.3	2296.48	1385.35	1729.61	4123.66	2358.45	1526.22	2823.99
A0A494BAB1;O09131	A0A494BAB1;O09131	Gsto1	Glutathione S-transferase omega;Glutathione S-transferase omega-1				506.259	612.872	518.631
A0A494BAF7;A0A494BBE7;A5GZX3;Q9CPU0	A0A494BAF7;A0A494BBE7;A5GZX3;Q9CPU0	Glo1	Glyoxalase 1;Glyoxalase 1;Lactoylglutathione lyase;Lactoylglutathione lyase	1225.82	1794.49	1410.54	1372.86	660.666	248.418	617.849	392.147	911.448
A0A494BAG6;F6ZBR8;G5E8J8;O88286	A0A494BAG6;F6ZBR8;G5E8J8;O88286	Wiz	Widely-interspaced zinc finger motifs;Widely-interspaced zinc finger motifs;Widely-interspaced zinc finger motifs;Protein Wiz	4380.26	3263.26	4974.03	3640.48	4613.8	4794.38	6733.3	4755.38	5574.63
A0A494BAH4;Q8K330	A0A494BAH4;Q8K330	Ssh3	Slingshot protein phosphatase 3;Protein phosphatase Slingshot homolog 3	40062.9	40643.7	43050.3	17449.3	17979.5	18523.3	16275.2	18071.9	12366.8
A0A494BAJ5;A0A494BB58;A0A494BBF1;Q543K2;Q9WU84	A0A494BAJ5;A0A494BB58;A0A494BBF1;Q543K2;Q9WU84	Ccs	Superoxide dismutase [Cu-Zn];Superoxide dismutase copper chaperone;Superoxide dismutase copper chaperone;Superoxide dismutase copper chaperone;Copper chaperone for superoxide dismutase	3935.62	2081.87	377.814	903.887	1012.29	274.443	675.906	534.807	977.243
A0A494BAQ7;Q91WT9	A0A494BAQ7;Q91WT9	Cbs	Cystathionine beta-synthase (Fragment);Cystathionine beta-synthase	649.05		947.38	1049.66	442.833	2132.53		800.884	1138.26
A0A494BAV5;P13011;P13516;Q3UXG5;Q547C4;Q8BNZ5;Q99PL7	A0A494BAV5;P13011;P13516;Q3UXG5;Q547C4;Q8BNZ5;Q99PL7	Scd2;Scd2;Scd1;Scd1;Scd1;Scd3;Scd3	Stearoyl-Coenzyme A desaturase 2;Stearoyl-CoA desaturase 2;Acyl-CoA desaturase 1;Fatty acid desaturase domain-containing protein (Fragment);Scd1 protein;Uncharacterized protein;Acyl-CoA desaturase 3	1620.98	2928.21	2079.44	2002.59	1703.82	1560.68	1291.01	2171.9	853.963
A0A494BAX5;A0A494BB89;A0A498WGK2;Q8BP47	A0A494BAX5;A0A494BB89;A0A498WGK2;Q8BP47	Nars;Nars;Nars;NARS1	asparagine--tRNA ligase (Fragment);Asparaginyl-tRNA synthetase;asparagine--tRNA ligase;Asparagine--tRNA ligase, cytoplasmic	4454.62	2658.05	5806.37	696.808	491.231	1024.29	2316.96	577.964	1302.07
A0A494BAZ4;G3UZJ4;P99029;Q3U7H9;Q3UWS9	A0A494BAZ4;G3UZJ4;P99029;Q3U7H9;Q3UWS9	Prdx5	Peroxiredoxin-5 (Fragment);thioredoxin-dependent peroxiredoxin;Peroxiredoxin-5, mitochondrial;Peroxiredoxin-5 (Fragment);Peroxiredoxin-5 (Fragment)	40205.7	34323.2	34775.3	8685.77	5559.82	8003.62	8306.6	8416.93	6179.85
A0A494BB08;B2RXR1;Q4QRL3	A0A494BB08;B2RXR1;Q4QRL3	Ccdc88b	Coiled-coil domain containing 88B (Fragment);Coiled-coil domain containing 88B;Coiled-coil domain-containing protein 88B	4643.38	5949.75	4043.18	918.848	1700.73	1609.49	1179.47	442.898	1575.73
A0A494BB25;Q3TC46	A0A494BB25;Q3TC46	Patl1	Protein associated with topoisomerase II homolog 1 (yeast);Protein PAT1 homolog 1	16966.5	18312.7	17853	14998.7	11167.4	10699.1	10701.9	9893.78	10175.2
A0A494BB73;A0A494BB77;B2RXQ3;B7ZWK5;E9Q839;Q3TST9;Q6P9P0;Q8BZ50	A0A494BB73;A0A494BB77;B2RXQ3;B7ZWK5;E9Q839;Q3TST9;Q6P9P0;Q8BZ50	Slf2	SMC5-SMC6 complex localization factor 2;SMC5-SMC6 complex localization factor 2;Family with sequence similarity 178, member A;Fam178a protein;SMC5-SMC6 complex localization factor 2;Coiled-coil SMC6 And NSE5 INteracting (CANIN) domain-containing protein (Fragment);SMC5-SMC6 complex localization factor protein 2;Coiled-coil SMC6 And NSE5 INteracting (CANIN) domain-containing protein (Fragment)		2673.49	2953.78					3421.05
A0A494BB75;E0CYH4;Q8C6G8	A0A494BB75;E0CYH4;Q8C6G8	Wdr26	WD repeat domain 26;WD repeat domain 26 (Fragment);WD repeat-containing protein 26	30780.3	35479.4	39479	25247.1	40263.6	25115.9	20941.7	18216.5	20767.1
A0A494BBB9;Q62120	A0A494BBB9;Q62120	Jak2	Tyrosine-protein kinase (Fragment);Tyrosine-protein kinase JAK2	42637.4	108443	42512.2	18056.3	10310.3	11166.7	5464.08	8125.38	8378.85
A0A494BBF7;D3Z5N6;Q3UKV4;Q61103	A0A494BBF7;D3Z5N6;Q3UKV4;Q61103	Dpf2	Double PHD fingers 2 (Fragment);Double PHD fingers 2;Zinc finger protein ubi-d4;Zinc finger protein ubi-d4	28481.4	39081.3	47544.6	32625.7	45357.8	31694.4	43664.7	52845.5	37736.3
A0A494BBI9;O89032	A0A494BBI9;O89032	Sh3pxd2a	SH3 and PX domains 2A;SH3 and PX domain-containing protein 2A	19075.9	21008.5	16554.2	36576.7	33833.7	30625.2	22575	29521	26077.4
A0A494BBP5;P25446	A0A494BBP5;P25446	Fas	Tumor necrosis factor receptor superfamily member 6	38828.1	31248.9	31265.7	20078	19023.5	19870.7	22561.3	23317.7	24405.4
A0A498WFS2;Q922Y1	A0A498WFS2;Q922Y1	Ubxn1	UBX domain protein 1;UBX domain-containing protein 1	138280	121573	121753	61320.6	52741.7	62189.1	54271.6	58102.6	53648.4
A0A498WGD8;Q3U8R9;Q3UBF4;Q3UNH3;Q8CDN6	A0A498WGD8;Q3U8R9;Q3UBF4;Q3UNH3;Q8CDN6	Txnl1	Thioredoxin-like 1;PITH domain-containing protein;PITH domain-containing protein;PITH domain-containing protein (Fragment);Thioredoxin-like protein 1	9701.88	11102.2	11366.2	4585.15	3272.59	3606.03	1556.59	1623.15	2079.1
A0A498WGG5;D3Z764;F6URE6;Q6ZPK0	A0A498WGG5;D3Z764;F6URE6;Q6ZPK0	Phf21a	PHD finger protein 21A;PHD finger protein 21A;PHD finger protein 21A (Fragment);PHD finger protein 21A	1206.22	675.625	1306.42	264.528	361.347	913.592	332.928	1888.13	1205.57
A0A498WGK6;Q3UH23;Q571B0;Q8C6F5;Q9ET30	A0A498WGK6;Q3UH23;Q571B0;Q8C6F5;Q9ET30	Tm9sf3	Transmembrane 9 superfamily member;Transmembrane 9 superfamily member;Transmembrane 9 superfamily member (Fragment);Transmembrane 9 superfamily member;Transmembrane 9 superfamily member 3	5646.18	1691.64	5197.53	1354.49	1697.62	1379.8	516.789	1132.78	535.516
A0A498WGL8	A0A498WGL8	Ssh3	protein-serine/threonine phosphatase	35441	38289.3	37163.8	20061	21013.9	15598.1	12522.2	11265.8	15484.9
A0A4E9FSP6	A0A4E9FSP6	IGLC2	IgL2 (Fragment)	20956.6	13358.5	14650.6	12257.7	6942.58		5203.26
A0A4E9FT70	A0A4E9FT70	IGHG3	IgG3 (Fragment)	14369	889.6	7275.67	1446.59	5701.8	4560.63	4295.33	809.036	1921.76
A0A4E9G461	A0A4E9G461	IGHG2	IgG2 (Fragment)	15536.3	2207.89	371.023	609.078		204.067	1784.9
A0A4P3APB9	A0A4P3APB9	Mapkapk2	non-specific serine/threonine protein kinase	73474.4	88914.6	80872.6	44514	46277.1	53557.8	67726.2	57967.9	55466.5
A0A4Y5WWJ7	A0A4Y5WWJ7	Myo18a	Myosin XVIIIA transcript variant 6	26823.8	25325.4	27867.8	20367.3	17491.3	19652.3	17226.3	13055.6	13290.2
A0A509;Q9JIF9	A0A509;Q9JIF9	Myot	Myotilin	48882.9	48168.4	40160.2	13101.4	10716.3	11425.8	18336.2	17575.8	14443.7
A0A571BD03	A0A571BD03	Prr33	Proline rich 33	312058	294900	277040	119848	119590	132942	530739	524594	496259
A0A571BD95;A0A5F8MP95;G3UZD6;G3UZM6;Q3V426;Q6NWW1;Q80TU3;Q9ES00	A0A571BD95;A0A5F8MP95;G3UZD6;G3UZM6;Q3V426;Q6NWW1;Q80TU3;Q9ES00	Ube4b;Ube4b;Ube4b;Ube4b;;Ube4b;mKIAA0684;Ube4b	Ubiquitin conjugation factor E4;Ubiquitin conjugation factor E4;Ubiquitin conjugation factor E4;Ubiquitin conjugation factor E4;Ubiquitin conjugation factor E4;Ubiquitin conjugation factor E4;Ubiquitin conjugation factor E4 (Fragment);Ubiquitin conjugation factor E4 B	36582.4	30772.3	36983.2	30510.4	33676.7	30494.1	31836.1	36976.5	40358.8
A0A571BDG0;A0A571BDG6;A0A571BG39;B1AQX6;B1AQX7;B1AQX9;Q9QWI6	A0A571BDG0;A0A571BDG6;A0A571BG39;B1AQX6;B1AQX7;B1AQX9;Q9QWI6	Srcin1	SRC kinase signaling inhibitor 1	17248.1	14817.5	17057.5	7769.62	7442.71	5623.89	6680.25	7737.23	6667.86
A0A571BDK9	A0A571BDK9	Ccm2l	Cerebral cavernous malformation 2-like	2896.7	833.406	1840.72	2667.85	2413.23	2613.28	2270.78	2836.59	3643.12
A0A571BDL1	A0A571BDL1	Tmub1	Transmembrane and ubiquitin-like domain containing 1	7237.72	4589.23	4967.7	5751.08	7698.9	3528.58	7493.26	6456.87	2083.71
A0A571BDN3;A0A668KM70;E9QMF5;Q80TN7	A0A571BDN3;A0A668KM70;E9QMF5;Q80TN7	Nav3	Neuron navigator 3		576.592	1376.86	1092.16	1613.67	2886.36	1605.34	3004.61	1147.9
A0A571BDN7;B2RSC8;P46935	A0A571BDN7;B2RSC8;P46935	Nedd4	HECT-type E3 ubiquitin transferase;E3 ubiquitin-protein ligase;E3 ubiquitin-protein ligase NEDD4	18612.4	18243.5	22872.5	11637	14097.7	12478.1	10532.5	9357.42	12341.7
A0A571BDP7;D3YZ86;Q8VDV3	A0A571BDP7;D3YZ86;Q8VDV3	Rab3il1	RAB3A interacting protein (rabin3)-like 1;RAB3A interacting protein (rabin3)-like 1;Guanine nucleotide exchange factor for Rab-3A	20942.5	19328.3	20405.2	18745.3	17320.8	21183.9	24497.8	20605.5	23571.6
A0A571BDS0	A0A571BDS0	Xirp1	Xin actin-binding repeat containing 1	50350.3	41922.3	44535.5	23096	15336.6	18134.9	11919.5	12451.4	14174
A0A571BE94;A0A571BF12;F6RGI3	A0A571BE94;A0A571BF12;F6RGI3	Lcor	Ligand dependent nuclear receptor corepressor					544.624	921.004
A0A571BEC9;O88492	A0A571BEC9;O88492	Plin4	Perilipin 4;Perilipin-4				987.17
A0A571BEE9;A0A7P0A164	A0A571BEE9;A0A7P0A164	4930517N10Rik;Iqcf3	RIKEN cDNA 4930517N10 gene;IQ motif containing F3	12793.3	10533	12040.1	10251.3	9485.25	11570.1	13363.4	12153.2	13735.5
A0A571BEF4;A0A571BET4;A0A571BGG1;Q91X43	A0A571BEF4;A0A571BET4;A0A571BGG1;Q91X43	Sh3d19	SH3 domain protein D19;SH3 domain protein D19;SH3 domain protein D19;SH3 domain-containing protein 19		3628.24	4604.59	2515.44	2081.74	1820.66			401.072
A0A571BEG7;A2ADL9;A2ADS6;Q63ZW7	A0A571BEG7;A2ADL9;A2ADS6;Q63ZW7	Patj	PATJ, crumbs cell polarity complex component;InaD-like (Drosophila);PATJ, crumbs cell polarity complex component;InaD-like protein	14661.3	19393.2	17660.9	10947.1	11895.3	12713.5	8969.26	3583.76	553.524
A0A571BEH9;P97433	A0A571BEH9;P97433	Arhgef28	Rho guanine nucleotide exchange factor (GEF) 28;Rho guanine nucleotide exchange factor 28	1219.5		510.655	888.32	1495.67	637.455		2425.02
A0A571BEI2	A0A571BEI2	Aak1	AP2 associated kinase 1 (Fragment)	21233.4	23310.3	32533.5	38173.6	31638.5	39195	17186	14666.7	22659.7
A0A571BES1;A0A571BEW4;Q9JME5	A0A571BES1;A0A571BEW4;Q9JME5	Ap3b2	AP-3 complex subunit beta;AP-3 complex subunit beta;AP-3 complex subunit beta-2	12308.9	14072.7	3110.75	3391.38	3509.53	3391.58	1817.65	2620.48	2730.32
A0A571BEV7	A0A571BEV7	Zdhhc3	Palmitoyltransferase	1569.86	3471.98	603.375	4022.85	2730.33	3040.02	4683.46	4046.16	3093.35
A0A571BF46;A0A571BF58	A0A571BF46;A0A571BF58	Neb	Nebulin	55470.6	52639.7	52898	24094.7	23536.4	24069.8	48824.2	46157.9	48193.2
A0A571BFA7;Q148V8	A0A571BFA7;Q148V8	Fam83h	Family with sequence similarity 83, member H;Protein FAM83H	392142	420503	396372	441015	450463	449647	402108	409901	416669
A0A571BG24	A0A571BG24	Limch1	LIM and calponin homology domains 1	16305.5	16874.9	14165.2	9200.04	9574.2	8553.86	11963.2	12777.9	8861.71
A0A571BG59;A0A5F8MPH8;O54796	A0A571BG59;A0A5F8MPH8;O54796	Tnxb;Tnxb;Tnx	Tenascin XB;Tenascin XB;Tenascin-X	5782.31	5368.62	5985.99	2795.95	2767.2	2999.71	2577.89	2599.45	2575.91
A0A571BGD8	A0A571BGD8	Ppp1r12b	Protein phosphatase 1, regulatory subunit 12B	17101.1	19968.9	24125.8	16109.2	14441.9	16378.1	13265	13799.8	14640.2
A0A571BGG5	A0A571BGG5	Dst	Dystonin (Fragment)			590.997	641.462			5732.25	1684.3	521.719
A0A571BGH0;E0CXI4;P62482;Q3U0B0;Q3U7L1;Q3UPV6	A0A571BGH0;E0CXI4;P62482;Q3U0B0;Q3U7L1;Q3UPV6	Kcnab2	Voltage-gated potassium channel subunit beta-2;Potassium voltage-gated channel, shaker-related subfamily, beta member 2 (Fragment);Voltage-gated potassium channel subunit beta-2;Voltage-gated potassium channel subunit beta-2 (Fragment);Voltage-gated potassium channel subunit beta-2 (Fragment);Voltage-gated potassium channel subunit beta-2	4888.94	3842.27	2374.94	2700.51	2749.76	1420.79	3820.37	4481.48	3574
A0A589P973;Q8CH77	A0A589P973;Q8CH77	Nav1	Neuron navigator 1	1582.52	3834.41	2625.4	2506.21	2176.43	3206.75	2722.34	2590.64	959.654
A0A5F8MP98;A0A5F8MPF2;Q5SSZ5	A0A5F8MP98;A0A5F8MPF2;Q5SSZ5	Tns3	Tensin 3;Tensin 3;Tensin-3	5883.03	10293.2	6834.31	6216.93	6657	6739.44	4181.43	4142.36	3098.49
A0A5F8MPB9;P26043;Q3TH46;Q3U111;Q3UJJ8	A0A5F8MPB9;P26043;Q3TH46;Q3U111;Q3UJJ8	Rdx	Radixin;Radixin;FERM domain-containing protein (Fragment);FERM domain-containing protein (Fragment);FERM domain-containing protein (Fragment)	6751.87	7525.98	8733.68	6434.15	6245.14	5411.38	4146.14	4941.71	4174.96
A0A5F8MPD6;Q9CS72	A0A5F8MPD6;Q9CS72	Filip1	Filamin A interacting protein 1;Filamin-A-interacting protein 1	15246.2	15337	16763.5	10717.5	10923.7	7697.92	10351.9	9222.52	7313.08
A0A5F8MPE1	A0A5F8MPE1	Epb41l3	Erythrocyte membrane protein band 4.1 like 3	31634.2	29112.2	27833.6	41340.1	39637.6	40985.3	55183.9	61698.6	53768.3
A0A5F8MPF0;Q60575	A0A5F8MPF0;Q60575	Kif1b	Kinesin family member 1B;Kinesin-like protein KIF1B	31977.8	33182.1	30754.9	33038.2	32381.9	30266.2	26891.6	25304.2	23706
A0A5F8MPF3;A0A5F8MPN4;A0A5F8MPU7;Q8CJ19	A0A5F8MPF3;A0A5F8MPN4;A0A5F8MPU7;Q8CJ19	Mical3	F-actin monooxygenase;F-actin monooxygenase;F-actin monooxygenase;[F-actin]-monooxygenase MICAL3	15371.2	21790.4	13430.2	15097.5	19601.5	17435.5	13358.1	13208.7	9948.97
A0A5F8MPI9;A1L338;Q3UGX8;Q3UHC1;Q91ZZ2	A0A5F8MPI9;A1L338;Q3UGX8;Q3UHC1;Q91ZZ2	Rapgef1	Rap guanine nucleotide exchange factor (GEF) 1;Rap guanine nucleotide exchange factor (GEF) 1;Rap guanine nucleotide exchange factor (GEF) 1;Rap guanine nucleotide exchange factor (GEF) 1;Guanine nucleotide exchange factor	3624.58	7941.5	8746.52	8680.62	8183.58	8461.96	7061.2	7843.57	6470.13
A0A5F8MPK9;Q9EP69	A0A5F8MPK9;Q9EP69	Sacm1l	SAC1 suppressor of actin mutations 1-like (yeast);Phosphatidylinositol-3-phosphatase SAC1	15393.4	10972	10040.3	8235.35	7007.37	4375.78	6901.47	7012.92	5229.15
A0A5F8MPL3;E9Q9A3;E9QLK9;E9QQ05;Q3TWS4;Q3UI39;Q61548	A0A5F8MPL3;E9Q9A3;E9QLK9;E9QQ05;Q3TWS4;Q3UI39;Q61548	Snap91	Synaptosomal-associated protein 91;Synaptosomal-associated protein 91;Synaptosomal-associated protein 91;Synaptosomal-associated protein 91;Synaptosomal-associated protein 91;ENTH domain-containing protein;Clathrin coat assembly protein AP180	515.165	2939.22		1013.86	300.153	565.399			716.519
A0A5F8MPM4;E9QK82	A0A5F8MPM4;E9QK82	Mpz	Myelin protein P0	231199	223240	235010	147591	156967	138759	167308	160631	165747
A0A5F8MPN1;E9Q8I9	A0A5F8MPN1;E9Q8I9	Fry	FRY microtubule binding protein;Protein furry homolog	17154.9	17335.9	21211.4	13317.5	16241.1	15033.1	9029.67	12676.1	8176.25
A0A5F8MPN8;P14152	A0A5F8MPN8;P14152	Mdh1	Malate dehydrogenase;Malate dehydrogenase, cytoplasmic	10572	10190.9	11319.8	4778.65	4519.95	5982.85	5642.96	5411.61	4823.91
A0A5F8MPP4;P57080;Q3TTN0;Q8BR08	A0A5F8MPP4;P57080;Q3TTN0;Q8BR08	Usp25	ubiquitinyl hydrolase 1;Ubiquitin carboxyl-terminal hydrolase 25;Ubiquitin carboxyl-terminal hydrolase 25;Ubiquitin carboxyl-terminal hydrolase 25 (Fragment)	2249.11		1812.89	2127.72	2167.15
A0A5F8MPP7;A2AAY5;B9EJ37	A0A5F8MPP7;A2AAY5;B9EJ37	Sh3pxd2b	SH3 and PX domains 2B;SH3 and PX domain-containing protein 2B;SH3 and PX domains 2B	604.614	2199.14	1943.57	2056.77	2211.88	1967.24	1091.06	2092.71	251.648
A0A5F8MPR4;Q4U4S6	A0A5F8MPR4;Q4U4S6	Xirp2	Xin actin-binding repeat containing 2;Xin actin-binding repeat-containing protein 2	27258.5	24110.3	24726.1	22920.8	23881.7	23604.9	29049.7	29691.5	22663.4
A0A5F8MPS6;Q3UPS8;Q69ZS0	A0A5F8MPS6;Q3UPS8;Q69ZS0	Pdzrn3	PDZ domain containing RING finger 3 (Fragment);PDZ domain-containing protein (Fragment);E3 ubiquitin-protein ligase PDZRN3	18721.6	10168.6	13852	16934.9	17654.6	13353.9		3524.71	11396.8
A0A5F8MPT6;D3YUW7;E9QMC1;P59242	A0A5F8MPT6;D3YUW7;E9QMC1;P59242	Cgn	Cingulin	4828.16	11418.1	6411.8	12403.7	16367.7	15740.5	12213.4	10949.5	10784.5
A0A5F8MPX1;G3X940;Q3UPM9;Q8BZ21	A0A5F8MPX1;G3X940;Q3UPM9;Q8BZ21	Kat6a	Histone acetyltransferase;Histone acetyltransferase;Histone acetyltransferase (Fragment);Histone acetyltransferase KAT6A	13559.8	7785.17	7919.61	11378.6	10567.9	6752.48	3134.63	2592.77	4384.82
A0A5F8MPX2	A0A5F8MPX2	Sytl2	Synaptotagmin-like 2	875.413	885.425	1768.73	1556.12	1344.79	1684.89	1501.29	1901.74	797.237
A0A5F8MPY3;K7Q751;P34152	A0A5F8MPY3;K7Q751;P34152	Ptk2	non-specific protein-tyrosine kinase;non-specific protein-tyrosine kinase;Focal adhesion kinase 1	10588.4	15034.7	9573.01	11632.5	14445.6	10936.8	19409.2	19217.4	14418.4
A0A5F8MPY8;A6PW28;Q80U16	A0A5F8MPY8;A6PW28;Q80U16	Ripor2	RHO family interacting cell polarization regulator 2;Likely orthologue of H. sapiens chromosome 6 open reading frame 32 (C6orf32);Rho family-interacting cell polarization regulator 2	2233.74	415.052	596.153	12709.1	11987.3	6847.06	9009.24	11278.7	9980.3
A0A5F8MPZ2	A0A5F8MPZ2	Klc1	Kinesin light chain	29755.7	37767.8	31764.2	30682.6	34710.3	35368.7	25426.8	28845.2	22825.1
A0A5F8MQ05;D3Z6Q9;S4R1B8;S4R270;S4R2J8	A0A5F8MQ05;D3Z6Q9;S4R1B8;S4R270;S4R2J8	Bin2	Bridging integrator 2	6071.12	6636.75	7518.97	2784.84	3218.92	2976.71	1443.38	2297.57	3142.88
A0A5F8MQ25;G3X9K4;Q6A018;Q8R3Q2	A0A5F8MQ25;G3X9K4;Q6A018;Q8R3Q2	Ppp6r2	Protein phosphatase 6, regulatory subunit 2;Protein phosphatase 6, regulatory subunit 2;MKIAA0685 protein (Fragment);Serine/threonine-protein phosphatase 6 regulatory subunit 2	119938	106159	96856.1	92936	90741.4	107101	89429.9	87040.1	85919.1
A0A5F8MQ33;D3YUG5;D3YUI2;Q3U1I6;Q8K4J6	A0A5F8MQ33;D3YUG5;D3YUI2;Q3U1I6;Q8K4J6	Mrtfa	Myocardin related transcription factor A;Myocardin related transcription factor A (Fragment);Myocardin related transcription factor A;SAP domain-containing protein;Myocardin-related transcription factor A	7961.36	16946.8	8039.85	10565	13697.1	15593.3	14575.3	6960.09	7186.95
A0A5F8MQ39;Q3UH94;Q8BRB7	A0A5F8MQ39;Q3UH94;Q8BRB7	Kat6b	histone acetyltransferase;histone acetyltransferase;Histone acetyltransferase KAT6B	3398.91	1956.2	5538.51	2934.71	3922.15	2272.47	1812.91	2743.21	4262.49
A0A5F8MQ75;Q7TMY7	A0A5F8MQ75;Q7TMY7	Ipo8	Importin 8 (Fragment);Importin-8	5647.19	2212.47	1970.36	616.183	1346.2	1564.23	903.834	1254.73	1255.87
A0A5H1ZRL1	A0A5H1ZRL1	Spire1	Spire type actin nucleation factor 1	4519.05	1453.16	13723	951.288	3745.92	1754.6	3145.17	3516.78	2916.19
A0A5H1ZRL3;Q8C4Y3	A0A5H1ZRL3;Q8C4Y3	Nelfb	Negative elongation factor B	56261.3	320270	51913.2	22453.2	19346.6	20830.3	9082454	7284925	6.348e+06
A0A5K1VVP6;Q8BG87	A0A5K1VVP6;Q8BG87	Tet3	Methylcytosine dioxygenase TET;Methylcytosine dioxygenase TET3			658.059	3766.4	2121.25	11357.1	1090.9	2016.95	1284.44
A0A654ICD2;P23242	A0A654ICD2;P23242	Gja1	Gap junction protein;Gap junction alpha-1 protein	67711.7	67960.7	76958.1	109769	103510	116879	87727.4	84665.7	77913.7
A0A654ICL5;Q921C1	A0A654ICL5;Q921C1	Cxnp1;Gjc3	Gap junction protein;Gap junction gamma-3 protein	2668.88	4294.37	3258.58	998.997			25268.6	8210.56
A0A654ICX2;P28231	A0A654ICX2;P28231	Gjb3	Gap junction protein;Gap junction beta-3 protein	9885.78	8295.76	3763.79	7117.12	3484.85	4976.4		13483.1	24922.7
A0A654ICY8;Q3UWF8;Q64448	A0A654ICY8;Q3UWF8;Q64448	Gja3	Gap junction protein;Uncharacterized protein (Fragment);Gap junction alpha-3 protein
A0A668KL51;Q91VA7	A0A668KL51;Q91VA7	Idh3b	Isocitrate dehydrogenase [NAD] subunit, mitochondrial;Isocitrate dehydrogenase [NAD] subunit, mitochondrial	614.107			203.285	854.339	434.091		251.249
A0A668KL57;Q3U2K2;Q7TSH8	A0A668KL57;Q3U2K2;Q7TSH8	Tmem94	Transmembrane protein 94;Transmembrane protein 94 (Fragment);Transmembrane protein 94	7850.61	9214.34	9165.07	3784.96	7929	4764.79	4132.41	5786.79	5406.22
A0A668KL63;A0A668KLF1;A4QPE6;Q64691	A0A668KL63;A0A668KLF1;A4QPE6;Q64691	Capn3	Calpain-3 (Fragment);Calpain-3;Calpain-3;Calpain-3		412.046				1099.1
A0A668KL90;D6RHK9	A0A668KL90;D6RHK9	Dgkz	Diacylglycerol kinase;Diacylglycerol kinase zeta					1555.7	1243.44	3494.42		2655.11
A0A668KLC6;P20357	A0A668KLC6;P20357	Map2	Microtubule-associated protein;Microtubule-associated protein 2	12206.1	10400.8	5266.81	43677.7	36096.5	45200.6	19504.1	21419.4	19493.2
A0A668KLD3;A0A668KLV9;B2RRE0;Q9WTQ5	A0A668KLD3;A0A668KLV9;B2RRE0;Q9WTQ5	Akap12	A kinase (PRKA) anchor protein (Gravin) 12, isoform CRA_a;A kinase (PRKA) anchor protein (gravin) 12;A kinase (PRKA) anchor protein (Gravin) 12;A-kinase anchor protein 12	125354	119822	103295	45343	45362.4	40579.7	36690.2	35201	44681.6
A0A668KM61;A2VDF7;A7E1Z5;D3Z7G8;E1AWU4;E3VWA1;E9Q8N8;O88343	A0A668KM61;A2VDF7;A7E1Z5;D3Z7G8;E1AWU4;E3VWA1;E9Q8N8;O88343	Slc4a4	Anion exchange protein;Anion exchange protein (Fragment);Anion exchange protein;Solute carrier family 4 (anion exchanger), member 4 (Fragment);Anion exchange protein;Anion exchange protein;Anion exchange protein;Electrogenic sodium bicarbonate cotransporter 1	4313.46	3109.7	3065.57	6745.86	9224.17	8844.56	3548.41	7769.83	7553
A0A679AUV5;Q5Y4Y6;Q9EST1;Z4YKL5	A0A679AUV5;Q5Y4Y6;Q9EST1;Z4YKL5	Gsdma3;Gsdma3;Gsdma;Gsdma3	GasderminA-3;Gasdermin-A3;Gasdermin-A;Gasdermin A3				241.496				54177.3	30502.3
A0A6I8MWX0;A0A8V5KYN9;E9Q043	A0A6I8MWX0;A0A8V5KYN9;E9Q043	Fndc1	Fibronectin type III domain containing 1	3782.08	4890.63	4424.53	7083.26	8478.84	6826.83	4384.02	4585.02	5561.2
A0A6I8MWX7;Q6NZR2	A0A6I8MWX7;Q6NZR2	Msantd2	Myb/SANT-like DNA-binding domain containing 2;Myb/SANT-like DNA-binding domain-containing protein 2		2001.71	2830.52	4903.03	4150.99	4837.21		2322.52	1810.23
A0A6I8MWY5;A0A6I8MX07;A2AN46;A2AN48;E9PUQ5;Q5DTL1;Q921M4;Z4YJU8	A0A6I8MWY5;A0A6I8MX07;A2AN46;A2AN48;E9PUQ5;Q5DTL1;Q921M4;Z4YJU8	Golga2	Golgi autoantigen, golgin subfamily a, 2;Golgi autoantigen, golgin subfamily a, 2;Golgi autoantigen, golgin subfamily a, 2 (Fragment);Golgi autoantigen, golgin subfamily a, 2 (Fragment);Golgi autoantigen, golgin subfamily a, 2;MKIAA4150 protein (Fragment);Golgin subfamily A member 2;Golgi autoantigen, golgin subfamily a, 2	2920.51	2782.08	1836.93		5601.33	4841.61	5194.49	5635.68	6320.9
A0A6I8MWZ0;Q6P9Q6	A0A6I8MWZ0;Q6P9Q6	Fkbp15	peptidylprolyl isomerase (Fragment);FK506-binding protein 15	37072.8	19898.9	28825.7	17983.5	13387.9	16539.8	7354.07	11379.4	10745.2
A0A6I8MWZ8;D3YVW0;D3Z3F4;G3UYJ5;P47802;Q8R5C0	A0A6I8MWZ8;D3YVW0;D3Z3F4;G3UYJ5;P47802;Q8R5C0	Mtx1	Metaxin 1;Metaxin;Metaxin;Metaxin 1 (Fragment);Metaxin-1;Metaxin	7767.78	5772.48	4756.09	3517.31	3242.67	2401.46	8224.78	7945.84	8607.56
A0A6I8MX08;F6R1B7;Q5SNZ0	A0A6I8MX08;F6R1B7;Q5SNZ0	Ccdc88a	Coiled coil domain containing 88A;Coiled coil domain containing 88A (Fragment);Girdin	12380.7	12777.7	6587.41	12343.5	8592.18	7238.9	7027.2	5381.86	3718.81
A0A6I8MX12;E9PZ21;G3UZJ9;Q3TPK8;Q3TRU8;Q3TTX8;Q3UKR8;Q3V0L4;Q8BKJ2;Q8BUX2;Q8BWL5;Q91W59	A0A6I8MX12;E9PZ21;G3UZJ9;Q3TPK8;Q3TRU8;Q3TTX8;Q3UKR8;Q3V0L4;Q8BKJ2;Q8BUX2;Q8BWL5;Q91W59	Rbms3;Rbms1;Rbms3;Rbms1;Rbms3;Rbms1;Rbms1;Rbms1;Rbms3;Rbms3;Rbms3;Rbms1	RNA binding motif, single stranded interacting protein;RNA binding motif, single stranded interacting protein 1;RNA binding motif, single stranded interacting protein (Fragment);RRM domain-containing protein (Fragment);RRM domain-containing protein;RRM domain-containing protein;RRM domain-containing protein;RRM domain-containing protein;RRM domain-containing protein;RRM domain-containing protein;…				2003.47	3176.67	1863.04
A0A6I8MX15;A1A5B6;A2BD48;A2VCT6;E9PWX7;S4R2S6	A0A6I8MX15;A1A5B6;A2BD48;A2VCT6;E9PWX7;S4R2S6	Tbc1d25	Ornithine aminotransferase-like 1, isoform CRA_a;TBC1 domain family member 25;Tbc1d25 protein (Fragment);Tbc1d25 protein (Fragment);TBC1 domain family, member 25;TBC1 domain family, member 25	20153	9285.13	6659.84	4057.95	6184.5	4937.43	3988.79	5118.56	6672.32
A0A6I8MX27;P16125	A0A6I8MX27;P16125	Ldhb	L-lactate dehydrogenase;L-lactate dehydrogenase B chain	6239.81	6489.13	8198.19	2875.51	1991.49	1853.18	2361.65	2576.72	1349.92
A0A7G9TMG4;Q7TQ39	A0A7G9TMG4;Q7TQ39	gag	Gag;Gag protein	15004.4	13396.4	14409	9625.22	10201.7	8812.33	6766.47	5081.93	3526.8
A0A7H1MFM7;A0A7S8WJV7;A0A7T3QYS7;B1B0N6	A0A7H1MFM7;A0A7S8WJV7;A0A7T3QYS7;B1B0N6	Abpa24;Abpa24;Abpa24;Scgb1b24	ABPA24									4161.66
A0A7N4FLU7;P28028	A0A7N4FLU7;P28028	Braf	non-specific serine/threonine protein kinase (Fragment);Serine/threonine-protein kinase B-raf	67853.6	80053.3	79305	48384.3	62168	67632.1	48748.8	45432.6	58018.8
A0A7N9VR94	A0A7N9VR94	Ahnak2	AHNAK nucleoprotein 2	18099.5	19390.1	19565.8	19474.8	19687.5	21655	17379.2	17872.1	19432
A0A7N9VRB8;A0A7N9VSI9;Q6ZQL6;Q8R0J4	A0A7N9VRB8;A0A7N9VSI9;Q6ZQL6;Q8R0J4	Tmem134	Transmembrane protein 134;Transmembrane protein 134;cDNA fis, clone TRACH3032755;Transmembrane protein 134	951.863	27375.7	2391.77	435.912	1544.63	3551.91	2071.43	1529.19
A0A7N9VRC4;Q8R0W0	A0A7N9VRC4;Q8R0W0	Eppk1	Epiplakin 1;Epiplakin	108529	97665.7	110442	85344.4	86060.4	84224.3	97564.5	87817.9	82606.4
A0A7U3JW69;B1AU20;P70377	A0A7U3JW69;B1AU20;P70377	Fgf13	Fibroblast growth factor;Fibroblast growth factor;Fibroblast growth factor 13
A0A804C8S8;B2RTE7;Q3TCA1;Q6TDP3	A0A804C8S8;B2RTE7;Q3TCA1;Q6TDP3	Klhl17	Kelch-like 17;Kelch-like 17 (Drosophila);BTB domain-containing protein;Kelch-like protein 17	722.77	643.989							1189.06
A0A8D3UE05;Q09PK2	A0A8D3UE05;Q09PK2	Asprv1	Aspartic peptidase, retroviral-like 1;Retroviral-like aspartic protease 1	1663.44		663.073	1743.58	1903.59		1145.87	2775.16
A0A8D4USI8;A3KMF2;G3X8R8;P59759;Q5DTZ3	A0A8D4USI8;A3KMF2;G3X8R8;P59759;Q5DTZ3	Mrtfb	Megakaryoblastic leukemia 2 isoform named SOLOIST;Mkl2 protein (Fragment);Megakaryoblastic leukemia 2 isoform 3;Myocardin-related transcription factor B;MKIAA1243 protein (Fragment)	16927.1	8629.81	5993.68	3937.14	14833	5788.7	1729.63	8208.77	8687.29
A0A8I4Q8Y8;B7XGC0;Q8BU27	A0A8I4Q8Y8;B7XGC0;Q8BU27	Ppm1m	Protein phosphatase 1M;Protein phosphatase 2C eta-2;Protein phosphatase 1M	1736.25	1315.73	817.875	1000.6		1374	1777.37	1999.07
A0A8I4RSM0;Q02789	A0A8I4RSM0;Q02789	Cacna1s	Voltage-dependent L-type calcium channel subunit alpha;Voltage-dependent L-type calcium channel subunit alpha-1S	15850.4	13307.1	20207.6	8379.6	9282.78	10200.9	11439.2	8087.46	9731.61
A0A8I4SX76;D3YWY4;D3YZL8;D3Z6T4;H7BX09;H7BX90;Q5DTG7;Q6GQT7;Q6NWW3;Q925T6	A0A8I4SX76;D3YWY4;D3YZL8;D3Z6T4;H7BX09;H7BX90;Q5DTG7;Q6GQT7;Q6NWW3;Q925T6	Grip1	Glutamate receptor interacting protein 1;Glutamate receptor interacting protein 1;Glutamate receptor interacting protein 1;Glutamate receptor interacting protein 1;Glutamate receptor interacting protein 1;Glutamate receptor interacting protein 1;MKIAA4223 protein (Fragment);Glutamate receptor interacting protein 1;Grip1 protein;Glutamate receptor-interacting protein 1	18574.7	13682.5	20557.6	11841.6	11797.8	12064.6	23873.1	15764.1	12084.3
A0A8I4T5Q7;B1ATI9;F6QB26;Q0VBR8;Q3U432;Q3U8N2;Q60780	A0A8I4T5Q7;B1ATI9;F6QB26;Q0VBR8;Q3U432;Q3U8N2;Q60780	Gas7	Growth arrest specific 7 (Fragment);Growth arrest specific 7;Growth arrest specific 7;Growth arrest specific 7;Growth arrest specific 7;F-BAR domain-containing protein (Fragment);Growth arrest-specific protein 7	7663.74	6781.62	9791.25	6684.49	6490.55	6655.58	4812.43	5351.02	4521.88
A0A8Q0LUL2;B1AT32;B1AT33;B1AT34;Q66JY2	A0A8Q0LUL2;B1AT32;B1AT33;B1AT34;Q66JY2	Ino80d	INO80 complex subunit D (Fragment);INO80 complex subunit D;INO80 complex subunit D (Fragment);INO80 complex subunit D (Fragment);INO80 complex subunit D			1534.02	2286.71	538.891	1719.3		1018.46
A0A8Q0Q6H9;G3X8R2;Q80VJ2	A0A8Q0Q6H9;G3X8R2;Q80VJ2	Sra1	Steroid receptor RNA activator 1;Steroid receptor RNA activator 1 (Fragment);Steroid receptor RNA activator 1	3053.11		5281.92	805.868	1166.57	2583.61	1505.13	3400.39	1878.01
A0A8T9ISV8;A0A8T9ITP3;B7ZNR0;F8WI14;Q3TDX7;Q3TXB7;Q61508;Q9QX30;Q9Z2R8	A0A8T9ISV8;A0A8T9ITP3;B7ZNR0;F8WI14;Q3TDX7;Q3TXB7;Q61508;Q9QX30;Q9Z2R8	ECM1;ECM1;Ecm1;Ecm1;Ecm1;Ecm1;Ecm1;;	Extracellular matrix protein 1 form 1s;Extracellular matrix protein 1 form 1b;Ecm1 protein;Extracellular matrix protein 1;Extracellular matrix protein 1;Extracellular matrix protein 1;Extracellular matrix protein 1;Extracellular matrix protein;Extracellular matrix protein	143609	148626	131858	119355	116929	113295	91395.8	91845	93696.1
A0A8V5I5B0;E9PXW3;Q3MIA0;Q8CAH2;Q9CSP9;Q9D4M3	A0A8V5I5B0;E9PXW3;Q3MIA0;Q8CAH2;Q9CSP9;Q9D4M3	Ttc14	Tetratricopeptide repeat domain 14;Tetratricopeptide repeat domain 14;Ttc14 protein (Fragment);Uncharacterized protein;Tetratricopeptide repeat protein 14;Uncharacterized protein	5710.62	5910.63	5139.53	5931.39	5737.64	5119.51	4996.78	6765.9	4743.47
A0A8Z1S8W2;A0A8Z1SL50;D6RHA2;P82343	A0A8Z1S8W2;A0A8Z1SL50;D6RHA2;P82343	Renbp	N-acylglucosamine 2-epimerase	10593.5	8580.55	4728.75		4623.05	1400.25	1028.02	1719	544.981
A0A991EKZ2;Q6P5B5;Q9WVR4	A0A991EKZ2;Q6P5B5;Q9WVR4	Fxr2	FMR1 autosomal homolog 2;FMR1 autosomal homolog 2;RNA-binding protein FXR2	1697.33	1552.37		1524.62	1544.49	1537.28	1268.15	1461.68	918.804
A0A991ELD2;D3YY75;F7BWJ0;Q3UXU7;Q6ZPV8;Q80Z96;Q91ZD4	A0A991ELD2;D3YY75;F7BWJ0;Q3UXU7;Q6ZPV8;Q80Z96;Q91ZD4	Vangl2;Vangl2;Vangl1;Vangl1;Vangl2;Vangl1;Vangl2	Vang-like protein;Vang-like protein;VANGL planar cell polarity 1 (Fragment);Vang-like protein;MKIAA1215 protein (Fragment);Vang-like protein 1;Vang-like protein 2	51986.5	47450.1	48203.8	70790.2	69949.5	69853.1	55389.7	52836.9	53566.7
A0A991ELD7	A0A991ELD7	Usp19	ubiquitinyl hydrolase 1			2939.61		2038.1	824.959
A0A991ENV6;Q8VIJ6	A0A991ENV6;Q8VIJ6	Sfpq	Splicing factor proline/glutamine rich (polypyrimidine tract binding protein associated);Splicing factor, proline- and glutamine-rich	7560.13	9093.23	8143.49	8552.06	9053.31	10630.9	7071.86	6304.23	5489.86
A0A991ENW0;Q80ZM5	A0A991ENW0;Q80ZM5	H1f10	H1.10 linker histone;H1 histone family, member X	11741.8		8902.43		5541.68		6000.25	6415.62
A0A991ENW4;Q3U3V8	A0A991ENW4;Q3U3V8	Xrra1	X-ray radiation resistance associated 1;X-ray radiation resistance-associated protein 1						1076.34	8249.09	8530.2	7545.98
A0A991EQV1;A2ACM0;A4FUW1;Q8K4Q0	A0A991EQV1;A2ACM0;A4FUW1;Q8K4Q0	Rptor	Regulatory associated protein of MTOR, complex 1;Regulatory associated protein of MTOR, complex 1;4932417H02Rik protein (Fragment);Regulatory-associated protein of mTOR	108541	117177	117429	144226	136167	141502	116525	113050	128521
A0A991EQV5	A0A991EQV5	Nploc4	NPL4 homolog, ubiquitin recognition factor	14170.7	13798.7	14221.4	14243.2	13539.1	13771.8	6376.66	9599.31	8658.31
A0A9K3AVU2;A0A9K3AWQ4;P97492	A0A9K3AVU2;A0A9K3AWQ4;P97492	Rgs14	Regulator of G-protein signaling 14, isoform CRA_a;Regulator of G-protein signaling 14, isoform CRA_b;Regulator of G-protein signaling 14	12518.8	8270.22	14767.8	9093.79	6690.42	8863.49	5093.37	4476.66	8578.56
A0A9K3AW64;Q3TZZ7	A0A9K3AW64;Q3TZZ7	D12Ertd551e;Esyt2	DNA segment, Chr 12, ERATO Doi 551, expressed, isoform CRA_a;Extended synaptotagmin-2	2916.22	3577.09	2762.97	3268.91	4284.56	3264.03	2689.34	1650.27	2471.13
A0A9K3AWR6;H3BJN2;Q922M5	A0A9K3AWR6;H3BJN2;Q922M5	Cdca7l	Cell division cycle associated 7 like;Cell division cycle associated 7 like (Fragment);Cell division cycle-associated 7-like protein	7814.25	20947.8	43823.9	3673.75	3479.01	12534.9		4291.12	1112.94
A0A9K3AX25;Q4VAB0;Q8BIY1	A0A9K3AX25;Q4VAB0;Q8BIY1	mCG_129740;Gpatch3;Gpatch3	MCG129740 (Fragment);Gpatc3 protein;G patch domain-containing protein 3		1935.12	5149.51		2879.96	1306.74	7292.63	2796.31	2614.66
A0A9K3FH50;E9QJU4;Q8R4E4	A0A9K3FH50;E9QJU4;Q8R4E4	mCG_56131;Myoz3;Myoz3	MCG56131;Myozenin 3;Myozenin-3	30220.5	32559.2	34120.4	9566.52	10029.5	13156.7	50255.9	44986	47060.9
A0A9K3FH54;Q3UG39;Q3UIJ5;Q9QY01	A0A9K3FH54;Q3UG39;Q3UIJ5;Q9QY01	Ulk2	Unc-51 like kinase 2 (C. elegans) (Fragment);Serine/threonine-protein kinase;Serine/threonine-protein kinase;Serine/threonine-protein kinase ULK2	3800.56	3831.18	3695.73	3583.89	2608.21	1833.82	2602.29	3730.99	5230.47
A0A9K3FHL3;I7HPW4	A0A9K3FHL3;I7HPW4	Gprc5c	G protein-coupled receptor, family C, group 5, member C;G protein-coupled receptor, family C, group 5, member C	4917.03	5069.81	4256.59	3926.3	4190.53	3931.22	3644.64	2060.52	1968.03
A0A9K3FHN0;B7ZC18;P42227;Q3U5Q4;Q3U6S9;Q3ULI4;Q6GU23	A0A9K3FHN0;B7ZC18;P42227;Q3U5Q4;Q3U6S9;Q3ULI4;Q6GU23	Stat3	Signal transducer and activator of transcription 3 (Fragment);Signal transducer and activator of transcription;Signal transducer and activator of transcription 3;Signal transducer and activator of transcription;Signal transducer and activator of transcription;Signal transducer and activator of transcription;Signal transducer and activator of transcription	9389.94	7149.88	9102.5	2242.4	781.295	1605.42	3031.53	3088.59	579.729
A0A9K3FHS3;Q9D3P1	A0A9K3FHS3;Q9D3P1	Tchhl1	Trichohyalin-like 1;Trichohyalin-like protein 1	2185.38			92347.2	106150	93094	3370.19	2511.4	2308.94
A0AUN0;G3X928;Q4G0C0	A0AUN0;G3X928;Q4G0C0	Sec23ip	Sec23ip protein (Fragment);Sec23 interacting protein;Sec23 interacting protein	5859.44	7162.56	5690.46	3945.53	3893.53	5204.7	1638.77	655.082	2162.74
A0ELI5;Q8K2D3	A0ELI5;Q8K2D3	Edc3	Enhancer of mRNA-decapping protein 3	2659.08	1533.94	2800.08	2049.89	2097.66		2981.47		1164.25
A0JLN2;B2RS11;Q61457	A0JLN2;B2RS11;Q61457	Ccne1	Ccne1 protein (Fragment);Cyclin E1;G1/S-specific cyclin-E1	1440.44	2168.03	2141.62					558.887
A0JLR6;E9PZ12;Q4H4B4;Q6RHR9	A0JLR6;E9PZ12;Q4H4B4;Q6RHR9	Magi1	Magi1 protein (Fragment);Membrane associated guanylate kinase, WW and PDZ domain containing 1;MAGI1c;Membrane-associated guanylate kinase, WW and PDZ domain-containing protein 1	2249.74	3323.41		4177.38	4527.09	5389.43		4192.72	4546.27
A0JLV3;B2RVD5;P10853;Q64475;Q8CBB6;Q8CGP1;Q8CGP2;Q921L4	A0JLV3;B2RVD5;P10853;Q64475;Q8CBB6;Q8CGP1;Q8CGP2;Q921L4	Hist1h2bj;H2bc12;H2bc7;H2bc3;H2bc23;H2bc12;Hist1h2bp;LOC665622	Histone H2B (Fragment);Histone H2B;Histone H2B type 1-F/J/L;Histone H2B type 1-B;Histone H2B;Histone H2B type 1-K;Histone H2B type 1-P;Histone H2B	100929	84493.1	98501.6	70353.4	68989.4	79832	140515	147761	149885
A0JNY3;Q8BUV3	A0JNY3;Q8BUV3	Gphn	Gephyrin	50780.5	29773.5	34650.7	3692.12	2874.97	2756.29	4474.1	2622.8	2979.82
A0JNY7;F7CBP1;G3XA17;Q62448	A0JNY7;F7CBP1;G3XA17;Q62448	Eif4g2	Eukaryotic translation initiation factor 4, gamma 2;Eukaryotic translation initiation factor 4, gamma 2;Eukaryotic translation initiation factor 4, gamma 2;Eukaryotic translation initiation factor 4 gamma 2	23065.6	23747.5	27495	57570.9	60622.5	63630.6	39998.1	51532.6	49404.2
A0N9N8	A0N9N8		Fd (Fragment)
A0PJ57;Q76KJ5	A0PJ57;Q76KJ5	Polr1g	Cd3eap protein (Fragment);DNA-directed RNA polymerase I subunit RPA34		733.807	1036.22	1371.15	1750.72	421.763	1800.7	2603.75	678.785
A0PJ67;Q3TSC4;Q3V3D1;Q5NCR8;Q5NCR9;Q8BQY7	A0PJ67;Q3TSC4;Q3V3D1;Q5NCR8;Q5NCR9;Q8BQY7	Nsrp1	Nuclear speckle splicing regulatory protein 1 (Fragment);Nuclear speckle splicing regulatory protein 1 (Fragment);Nuclear speckle splicing regulatory protein 1 (Fragment);Nuclear speckle splicing regulatory protein 1 (Fragment);Nuclear speckle splicing regulatory protein 1;Nuclear speckle splicing regulatory protein 1 (Fragment)				9.17118	146.562		457.129		777.768
A0PJ89;Q810V0	A0PJ89;Q810V0	Mphosph10	Mphosph10 protein (Fragment);U3 small nucleolar ribonucleoprotein protein MPP10				725.894		1089.01		1770.44	1206.28
A0PJ91;P07901;Q80Y52	A0PJ91;P07901;Q80Y52	Hsp90aa1	Hsp90aa1 protein (Fragment);Heat shock protein HSP 90-alpha;Heat shock protein 90, alpha (Cytosolic), class A member 1	798431	773383	741844	278659	297642	324257	132596	133380	153484
A0PJJ1;B2RQG2	A0PJJ1;B2RQG2	Phf3	Phf3 protein (Fragment);PHD finger protein 3	13607.7	12799.2	12100.7	21950.2	18349.9	18912.5	20350.9	18672.4	20783.9
A0PJK9;J3KMQ6;Q9CYI0	A0PJK9;J3KMQ6;Q9CYI0	5730455P16Rik;5730455P16Rik;	Protein Njmu-R1;RIKEN cDNA 5730455P16 gene;Protein Njmu-R1	10744	11106.3	8637.4	4585.52	5527.93	4673.02	3408.08	3341.3	1422.04
A0PJL0;B9EKK8;Q3TEI4	A0PJL0;B9EKK8;Q3TEI4	1700017B05Rik;1700017B05Rik;	1700017B05Rik protein (Fragment);Uncharacterized protein;Uncharacterized protein C15orf39 homolog	5543.81	4144.13	4236.42		4803.76	3630.79	5063.06	5819.3	5445.57
A0ZVB6;E9QAE3	A0ZVB6;E9QAE3	Btaf1	TBP-associated factor 170;B-TFIID TATA-box binding protein associated factor 1	6687.82	1970.81	3612.28	2584.19	391.866	1733.31	1955.47	3344	1812.02
A1A4T2;Q8BHN3	A1A4T2;Q8BHN3	Ganab	Alpha glucosidase 2 alpha neutral subunit;Neutral alpha-glucosidase AB	9262.74	9859.77	10620.7	5303.51	3827.2	4638.53	5177.3	3705.73	3061.56
A1BN54	A1BN54	Actn1	Actinin, alpha 1	8687.01	11139.7	9912.86	5308.11	5456.31	3966.26	6878.09	3709.36	4479.76
A1IGX7;Q7TMD7	A1IGX7;Q7TMD7	Dsg4	Desmoglein4;Desmoglein-4	6561.51	8967.22	6978.04	2204.32	1864.55	1175.88	813.134	688.526	660.9
A1ILG8;Q8BX70	A1ILG8;Q8BX70	Vps13c	Chorein;Intermembrane lipid transfer protein VPS13C	7326.02	8475.44	11709.7	5500.6	5993.97	5344.9	4440.27	3124.44	3875.73
A1L013;Q9CS00	A1L013;Q9CS00	Cactin	Splicing factor Cactin	5967.66	10534.1	8224.59	5879.57	6475.9	6602.31	5332.61	6321.41	7519.69
A1L0U6;A2AS98;P28660	A1L0U6;A2AS98;P28660	Nckap1	Nckap1 protein (Fragment);NCK-associated protein 1;Nck-associated protein 1	5648.15	3527.5	5003.89	619.857	307.774		1598.37	3077	3394.53
A1L317	A1L317	Krt24	Keratin, type I cytoskeletal 24	2268.01	2821.19	3263.37	2407.53	2906.67	3163.94	4248.76	3387.79	3205.56
A1L331;E9Q704;F8VQA4;P97467;Q3V1A8	A1L331;E9Q704;F8VQA4;P97467;Q3V1A8	Pam	Pam protein;Peptidylglycine alpha-amidating monooxygenase;Peptidylglycine alpha-amidating monooxygenase;Peptidyl-glycine alpha-amidating monooxygenase;peptidylamidoglycolate lyase (Fragment)		837.771	1974.11		14667.6
A1L333;Q3V0Z8;Q5U222;Q61656;Q8BTS0	A1L333;Q3V0Z8;Q5U222;Q61656;Q8BTS0	Ddx5	Probable ATP-dependent RNA helicase DDX5;Probable ATP-dependent RNA helicase DDX5 (Fragment);Probable ATP-dependent RNA helicase DDX5 (Fragment);Probable ATP-dependent RNA helicase DDX5;Probable ATP-dependent RNA helicase DDX5	4861.41	5771.35	3692.04	4674.42	4378.12	3960.56	2269.42	3315.87	2590.55
A1L341;A9C475;F6U6X3;Q61158;Q61214;Q8C774;Q8K006;Q9Z188	A1L341;A9C475;F6U6X3;Q61158;Q61214;Q8C774;Q8K006;Q9Z188	Dyrk1a;Dyrk1a;Dyrk1a;Dyrk1c;Dyrk1a;Dyrk1a;Dyrk1a;Dyrk1b	dual-specificity kinase;dual-specificity kinase;dual-specificity kinase;YRK (Fragment);Dual specificity tyrosine-phosphorylation-regulated kinase 1A;Protein kinase domain-containing protein;Dyrk1a protein (Fragment);Dual specificity tyrosine-phosphorylation-regulated kinase 1B	189817	178502	180894	143858	122913	129662	143948	152570	151832
A1L353;P82198;Q3TAY9	A1L353;P82198;Q3TAY9	Tgfbi	Transforming growth factor, beta induced;Transforming growth factor-beta-induced protein ig-h3;Uncharacterized protein (Fragment)	7785.13	5824.73	6326.72	4349.53	3578.17	4464.33	3510.07	2306.38	2453.86
A1L366;A1L367;Q3TG35;Q3UTE4;Q61550;Q6ZQJ6	A1L366;A1L367;Q3TG35;Q3UTE4;Q61550;Q6ZQJ6	Rad21	RAD21 homolog (S. pombe);RAD21 homolog (S. pombe);Double-strand-break repair protein rad21 homolog;Double-strand-break repair protein rad21 homolog (Fragment);Double-strand-break repair protein rad21 homolog;MKIAA0078 protein (Fragment)	7642.18	6007.67	6109.13	2312.07	2346.39	2303.85	3712.04	2342.51	3057.94
A1L3B8;P26516	A1L3B8;P26516	Psmd7	Proteasome (Prosome, macropain) 26S subunit, non-ATPase, 7;26S proteasome non-ATPase regulatory subunit 7		574.832	1265.65	1443.8	1588.22	354.92	2921.76	8083.13
A1L3P4;B0QZV3;Q80U52	A1L3P4;B0QZV3;Q80U52	Slc9a6	Sodium/hydrogen exchanger 6;Sodium/hydrogen exchanger;Sodium/hydrogen exchanger (Fragment)	6283.52	13086.7	3421.31	3922.98	3318.79	5129.81	3621.35	2673.6	1728.71
A1L3S7;Q8VHR5	A1L3S7;Q8VHR5	Gatad2b	GATA zinc finger domain containing 2B;Transcriptional repressor p66-beta	8922.38	2715.9	7395.65	6053.75	3184.22	6454.38	6587.73	7119.54	10153.6
A1L3T7	A1L3T7	Ripor3	RIPOR family member 3	4982.9	8246.63	5721.59	12944.9	15151	16459.7	15946.2	13293.3	15103.3
A1YYM3;A1YYM4;A1YYM5;A1YYM6;A1YYM7;A1YYM8;A1YYM9;A1YYN0;A1YYN2;A1YYN4;A1YYN5;A1YYN6;A1YYN7;A1YYN8;A1YYN9;A1YYP0;A1YYP1;B7ZWP2;B9EKY4;D3Z5M8;E9PVU6;E9PX60;E9PX67;E9PX88;E9PX90;E9PXV8;E9Q5C2;E9Q5C3;E9Q700;E9Q708;E9Q7C7;E9Q7E6;E9Q7E8;E9Q7T0;E9QK53;P21803	A1YYM3;A1YYM4;A1YYM5;A1YYM6;A1YYM7;A1YYM8;A1YYM9;A1YYN0;A1YYN2;A1YYN4;A1YYN5;A1YYN6;A1YYN7;A1YYN8;A1YYN9;A1YYP0;A1YYP1;B7ZWP2;B9EKY4;D3Z5M8;E9PVU6;E9PX60;E9PX67;E9PX88;E9PX90;E9PXV8;E9Q5C2;E9Q5C3;E9Q700;E9Q708;E9Q7C7;E9Q7E6;E9Q7E8;E9Q7T0;E9QK53;P21803	Fgfr2	Fibroblast growth factor receptor;Fibroblast growth factor receptor;Fibroblast growth factor receptor;Fibroblast growth factor receptor;Fibroblast growth factor receptor;Fibroblast growth factor receptor;Fibroblast growth factor receptor;Fibroblast growth factor receptor;Fibroblast growth factor receptor;receptor protein-tyrosine kinase;Fibroblast growth factor receptor;Fibroblast growth factor r…	1980.46	1262.53		747.345					18321.6
A2A3V1	A2A3V1	Akap17b	A-kinase anchor protein 17B	2137.81	4098.39			1141.25	2146.88		47519.1
A2A432;E9PXY1;J3QJX0	A2A432;E9PXY1;J3QJX0	Cul4b	Cullin-4B;Cullin 4B;Cullin 4B	6333.28	4962.86	6400.45	6037.92	7262.42	7576.13	4582.14	2721.2	3275.12
A2A482;A2A483;A2A484;A2A485;E9Q8D1;Q3U1M7;Q3UH28;Q3V1I9;Q80XT8;Q80Y82;Q8CHB3	A2A482;A2A483;A2A484;A2A485;E9Q8D1;Q3U1M7;Q3UH28;Q3V1I9;Q80XT8;Q80Y82;Q8CHB3	Zmynd8	Zinc finger, MYND-type containing 8;Zinc finger, MYND-type containing 8;Zinc finger, MYND-type containing 8;Zinc finger, MYND-type containing 8;Zinc finger, MYND-type containing 8;Zinc finger, MYND-type containing 8;Zinc finger, MYND-type containing 8;Protein kinase C-binding protein 1;Prkcbp1 protein (Fragment);Protein kinase C binding protein 1;MKIAA1125 protein (Fragment)	58352.1	54214.6	49248.4	33982.6	31651.7	36189.7	42981	36587.5	33446
A2A4A6;Q2M4I9;Q3UZ68;Q62077	A2A4A6;Q2M4I9;Q3UZ68;Q62077	Plcg1	1-phosphatidylinositol 4,5-bisphosphate phosphodiesterase gamma;1-phosphatidylinositol 4,5-bisphosphate phosphodiesterase gamma;1-phosphatidylinositol 4,5-bisphosphate phosphodiesterase gamma;1-phosphatidylinositol 4,5-bisphosphate phosphodiesterase gamma-1	6381.21					1860.31
A2A4B1;A2A4B3;Q149B0;Q571G1;Q8CC87;Q99PI4	A2A4B1;A2A4B3;Q149B0;Q571G1;Q8CC87;Q99PI4	Lpin3	phosphatidate phosphatase;phosphatidate phosphatase;phosphatidate phosphatase;phosphatidate phosphatase (Fragment);phosphatidate phosphatase;Phosphatidate phosphatase LPIN3	62496.9	54562.7	57278.1	69783.3	73909.7	65337.6	30488.4	32797.5	31600.6
A2A4H9;Q3UNJ3;Q61576	A2A4H9;Q3UNJ3;Q61576	Fkbp10	peptidylprolyl isomerase;peptidylprolyl isomerase;Peptidyl-prolyl cis-trans isomerase FKBP10	4036.5	7399.79	9680.44	2636.8	2458.51	305.021	3498.92	2025.89	1717.83
A2A4N9;A2A4P0;Q3UQQ4;Q5DTN5	A2A4N9;A2A4P0;Q3UQQ4;Q5DTN5	Dhx8	RNA helicase (Fragment);ATP-dependent RNA helicase DHX8;RNA helicase;RNA helicase (Fragment)	9933.3	7695.59	9565.63	8719.18	10224.1	9263.97	9271.62	8042.56	9417.55
A2A4P3;A2A4P4;Q3THG9	A2A4P3;A2A4P4;Q3THG9	Gm27029;Gm27029;Aarsd1	Predicted gene, 27029;Predicted gene, 27029;Alanyl-tRNA editing protein Aarsd1	10002.3	8422.28	8354.47	4777.56	4854.63	6534.75	4287.61	4128.44	5824.28
A2A4P5	A2A4P5	Ptges3l	Prostaglandin E synthase 3 like	18558.8	34034.6	27187	32733.3	34210.8	34336.9	21986.3	20716.5	24800.9
A2A4Q0;P61358;Q5BLJ9;Q9CSM4	A2A4Q0;P61358;Q5BLJ9;Q9CSM4	Rpl27;Rpl27;Rpl27;	60S ribosomal protein L27 (Fragment);Large ribosomal subunit protein eL27;60S ribosomal protein L27;60S ribosomal protein L27 (Fragment)	5633.26	3504.04	4439.14	3662.91	4755.19	2771.17	3317.59	1825.75	2415.23
A2A513;P02535	A2A513;P02535	Krt10	Keratin 10;Keratin, type I cytoskeletal 10	105788	104391	91154.5	131406	136184	143555	125477	122074	125574
A2A542	A2A542	Cacnb1	Voltage-dependent L-type calcium channel subunit beta-1	18526.9	20538.2	13636	11805.8	13526	12897.5	17420.4	15882.4	15213.6
A2A547;P84099;Q5I0T8	A2A547;P84099;Q5I0T8	Rpl19	Ribosomal protein L19;Large ribosomal subunit protein eL19;Ribosomal protein L19	5480.75	2960.83	759.381	2517.31		3622.27	1856.72	2547.93	2022.3
A2A5F5;B2RPS1;P35278;P61021;Q0PD56;Q3TCT9;Q3TJ39;Q8C266;Q8C458;Q9CQD1	A2A5F5;B2RPS1;P35278;P61021;Q0PD56;Q3TCT9;Q3TJ39;Q8C266;Q8C458;Q9CQD1	Rab5c;Rab5b;Rab5c;Rab5b;Rab5b;Rab5c;Rab5c;Rab5c;Rab5b;Rab5a	RAB5C, member RAS oncogene family (Fragment);RAB5B, member RAS oncogene family;Ras-related protein Rab-5C;Ras-related protein Rab-5B;Rab5B;Ras-related protein Rab-5C;Rab5C;RAB5C, member RAS oncogene family;Ras-related protein Rab-5B;Ras-related protein Rab-5A	8811.2	5174.71	5080.77	2162.11	2420.74	1237.31	1135.14	599.187	895.888
A2A5K2;P55065;Q3UE59;Q3UFS5;Q4FJT5	A2A5K2;P55065;Q3UE59;Q3UFS5;Q4FJT5	Pltp	Phospholipid transfer protein;Phospholipid transfer protein;Phospholipid transfer protein (Fragment);Phospholipid transfer protein;Pltp protein	3491.27	4526.01	5478.33	2465.54	1203.44	1103.32	783.164	735.373	1741.66
A2A5K6	A2A5K6	Znf335	Zinc finger protein 335	19899.8	2214.87	4456.32	3231.68	5377.55	3679.9	6220.18	3088.85	3930.66
A2A5N2;Q9CQV8	A2A5N2;Q9CQV8	Ywhab	Tyrosine 3-monooxygenase/tryptophan 5-monooxygenase activation protein, beta polypeptide;14-3-3 protein beta/alpha	3196.79	4367.68	3225.06	4372.97	3255	3617.84	2354.64	2276.7	2430.3
A2A5R2	A2A5R2	Arfgef2	Brefeldin A-inhibited guanine nucleotide-exchange protein 2	13458.1	13365.4	12041.9	10526.9	8500.61	9536.06	10133.8	10476.3	10236
A2A5Y4;Q80TG1	A2A5Y4;Q80TG1	Kansl1	KAT8 regulatory NSL complex subunit 1	20089.4	21781.3	19166.6	25471.9	25152.2	22915.6	27758.3	26454.6	23277.4
A2A600;A2A601;A2A602;A6PW68;F2Z431;P52293;Q52L97	A2A600;A2A601;A2A602;A6PW68;F2Z431;P52293;Q52L97	Kpna2	Karyopherin (importin) alpha 2 (Fragment);Karyopherin (importin) alpha 2 (Fragment);Karyopherin (importin) alpha 2;Karyopherin (importin) alpha 2 (Fragment);Karyopherin (importin) alpha 2;Importin subunit alpha-1;Importin subunit alpha	1334.47	760.413	2.09964	6367.74	14094.8	8144.59	13225.8	18835.8	15112.8
A2A621;F6RXN4;Q8BYZ1;Q8BZP5	A2A621;F6RXN4;Q8BYZ1;Q8BZP5	RP23-151M22.4-003;Abi3;Abi3;	ABI gene family, member 3 (Fragment);ABI family member 3 (Fragment);ABI gene family member 3;Abl-interactor homeo-domain homologous domain-containing protein	2070.72	2463.67	2816.88	3933.79	4761.14	1326.62	477.532		766.182
A2A654;A2A655;E5D6T0;E9Q6A7	A2A654;A2A655;E5D6T0;E9Q6A7	Bptf	Bromodomain PHD finger transcription factor;Bromodomain PHD finger transcription factor;Bromodomain PHD finger transcription factor splice variant;Bromodomain PHD finger transcription factor	44698.5	45510.7	45072.7	43706.1	42150	39024.7	31976.9	41898.1	42660.1
A2A690;F6VP19	A2A690;F6VP19	Tanc2	Protein TANC2;Tetratricopeptide repeat, ankyrin repeat and coiled-coil containing 2 (Fragment)	37400.1	48813.4	40391.2	50715.9	54843.8	52063.2	40509.8	31804.4	25515.1
A2A699	A2A699	Fam171a2	Protein FAM171A2		982.754	394.736	1194.62	1309.48	856.727	619.017	386.46	1638.28
A2A6A1	A2A6A1	Gpatch8	G patch domain-containing protein 8	21524.1	21747.6	18543	10013.1	12000.9	12215.1	18129.1	20438.4	13900.8
A2A6H6	A2A6H6	Tnnt3	Troponin T3, skeletal, fast	9445.62	15455	29851.6	34212.2	52523.7	47370.7	38771.4	17766.9	15594
A2A6I0	A2A6I0	Tnnt3	Troponin T3, skeletal, fast	11502.8	2034.56	2242.09	2083.65	3792.17	1610.8	1135.28	923.506	1890.65
A2A6I5	A2A6I5	Tnnt3	Troponin T3, skeletal, fast	417372	476129	438878	64909.5	69586.8	79726.3	51349	23943.7	62905.3
A2A6J0	A2A6J0	Tnnt3	Troponin T3, skeletal, fast	4273.87	4318.75	4570.33	4666.33	5983.39	4871.36	2678.58	1916.48	4282.88
A2A6J2	A2A6J2	Tnnt3	Troponin T3, skeletal, fast (Fragment)	6467.73	11961.9	13595.7	6668.45	6900.84	7903.72	4548.61	3319.48	4306.4
A2A6P4	A2A6P4	Fam104a	Family with sequence similarity 104, member A	3508.92	1536.24	5151.62	24696.6	20553.3	19765.8	13006.7	22194.7	23468.6
A2A6Q8;P09541;Q9CZ19	A2A6Q8;P09541;Q9CZ19	Myl4	Myosin, light polypeptide 4 (Fragment);Myosin light chain 4;Myosin, light polypeptide 4	1.14435	1.33544	1
A2A6S1;B2RU54;Q3TB48;Q6KAU5	A2A6S1;B2RU54;Q3TB48;Q6KAU5	Tmem104;Tmem104;Tmem104;mFLJ00021	Transmembrane protein 104;Transmembrane protein 104;Transmembrane protein 104;MFLJ00021 protein (Fragment)				536.801	1428.12	1339.82		2858.37	2064.73
A2A6T1;B2RWR4;B7ZMV4	A2A6T1;B2RWR4;B7ZMV4	Cdr2l	Cerebellar degeneration-related protein 2-like;Cerebellar degeneration-related protein 2-like;Cdr2l protein	4576.18	4932.98	5655.82	3156.84		3025.88	1248.06	3615.12
A2A6U3;Q80UG5	A2A6U3;Q80UG5	Septin9	Septin 9;Septin-9	23745	21394.2	24328.2	17402.3	21074.3	21320.4	12290.9	16873.1	14568.1
A2A791	A2A791	Zmym4	Zinc finger MYM-type protein 4	29515.2	13252.6	15935.8	31733.4	42387.2	40267	14419.2	16145.7	14304.9
A2A7B5;B9EKQ3	A2A7B5;B9EKQ3	Prdm2	PR domain containing 2, with ZNF domain;Prdm2 protein	33399	28229.8	28665.8	37542.9	36879.1	37913.2	34583.7	38666.1	29178.9
A2A7F4;E9Q532;Q3V1H6	A2A7F4;E9Q532;Q3V1H6	Rlf	Rearranged L-myc fusion sequence;Rearranged L-myc fusion sequence;C2H2-type domain-containing protein (Fragment)	13630.1	14533.7	13514	28886.4	32773.9	30713.1	17160.7	20770.1	25738.3
A2A7F6;O35454;Q3UM91;Q5DU51	A2A7F6;O35454;Q3UM91;Q5DU51	Clcn6;Clcn6;Clcn6;mKIAA0046	Chloride channel protein;H(+)/Cl(-) exchange transporter 6;Chloride channel protein;Chloride channel protein (Fragment)	3831.65	2812.9	2513.95	3634.85			1803.39
A2A7Q5;A6PW84;Q3V1T4	A2A7Q5;A6PW84;Q3V1T4	P3h1	procollagen-proline 3-dioxygenase;procollagen-proline 3-dioxygenase;Prolyl 3-hydroxylase 1	522.651	468.992	360.863	489.817	303.468	819.06	913.192	3.9061
A2A7S8	A2A7S8	Kiaa1522	Uncharacterized protein KIAA1522	6867.72	7587	7763.91	6641.46	6644.1	7053.63	8523.24	8540.06	8397.38
A2A7T3;Q80TZ9	A2A7T3;Q80TZ9	Rere	Arginine glutamic acid dipeptide (RE) repeats;Arginine-glutamic acid dipeptide repeats protein	35915	41704.2	37299.4	27074.7	25942.2	28434.6	17353.8	20559.8	21802.5
A2A7U2;B2RU44;Q8BS54;Q8K048;Q9QXK1	A2A7U2;B2RU44;Q8BS54;Q8K048;Q9QXK1	Zmym6;Zmym6;Zmym6;Zmym6;	Zinc finger, MYM-type 6;Zinc finger, MYM-type 6;Zinc finger, MYM-type 6;Zmym6 protein (Fragment);Transposase-like protein (Fragment)	3670.62	4805.48	6562.39		6679.75	4697.18		4049.27
A2A7Y5;C0KL25	A2A7Y5;C0KL25	Miip	Migration and invasion-inhibitory protein;Invasion inhibitory protein 45	4748.14		2226.39	2166.56
A2A7Z4;Q78IG7;Q9CQH7	A2A7Z4;Q78IG7;Q9CQH7	Btf3l4	Transcription factor BTF3;Transcription factor BTF3 (Fragment);Transcription factor BTF3 homolog 4	30335.3	38937.9	28997.7	5822.5	3205.29	6178.3	3195.8	3138.93	5106.79
A2A813;Q99LX0	A2A813;Q99LX0	Park7	protein deglycase;Parkinson disease protein 7 homolog	5539.74	4644.01	5451.44	1802.56	1632.95	1718.51	1109.73	1556.46	1515.34
A2A832;Q8BWA8	A2A832;Q8BWA8	Arhgef19	Rho guanine nucleotide exchange factor (GEF) 19 (Fragment);Rho guanine nucleotide exchange factor 19	8780.16	6095.11	5626.84	17483	19575.1	18693.9	14480.3	17768	12063
A2A841;A2A842;P48193	A2A841;A2A842;P48193	Epb41	Protein 4.1;Erythrocyte membrane protein band 4.1;Protein 4.1	9165.91	10974.2	12774	7424.52	8409.37	11661.8	8464.35	10493.5	10820.2
A2A863	A2A863	Itgb4	Integrin beta-4	169589	147992	147374	139218	149510	153214	199014	196846	213264
A2A864	A2A864	Itgb4	Integrin beta	13179.7	16542.3	20129.2	9048.39	4318.45		5550.59	38460.6	3384.84
A2A884	A2A884	Hivep3	Transcription factor HIVEP3				1.08314	2.01426	0.699093		0.54877	1.0673
A2A8E8;P52825;Q3UDA8;Q3UN55	A2A8E8;P52825;Q3UDA8;Q3UN55	Cpt2	Carnitine palmitoyltransferase 2 (Fragment);Carnitine O-palmitoyltransferase 2, mitochondrial;Choline/carnitine acyltransferase domain-containing protein;Choline/carnitine acyltransferase domain-containing protein	1017.05	2730.25	2823.44	911.477	1514.13	1717.92	2831.89	634.692	1064.11
A2A8L5;F6S1X8;F6Y3V0	A2A8L5;F6S1X8;F6Y3V0	Ptprf	Receptor-type tyrosine-protein phosphatase F;protein-tyrosine-phosphatase (Fragment);protein-tyrosine-phosphatase (Fragment)	3780.19	2337.67	1806.58	1977.49	1783.03
A2A8L9;Q8BW72	A2A8L9;Q8BW72	Kdm4a	[histone H3]-trimethyl-L-lysine(9) demethylase;Lysine-specific demethylase 4A		2761.5		4343.62	2400.97	3696.59	1710.98	4423.49	3428.17
A2A8R0;A8Y5G5	A2A8R0;A8Y5G5	Zfyve9	Zinc finger FYVE domain-containing protein					5483.63	7847.5	3289.59
A2A8U2	A2A8U2	Tmem201	Transmembrane protein 201	11768.9	11357.1	8950.5	2949.62	5663.77	5829.62	5835.36	7199.3	8177.95
A2A953;P97480;Q3TP96;Q6P4T3	A2A953;P97480;Q3TP96;Q6P4T3	Eya3	Eyes absent homolog (Fragment);Eyes absent homolog 3;Eyes absent homolog;Eyes absent homolog	802.597	1816.1	1125.21	718.126	798.206	870.488	523.089	1607.4	2734.66
A2A983	A2A983	Srrm1	Serine/arginine repetitive matrix 1 (Fragment)	93168	64150.6	96179.2	69977	71887.5	59921	60712.8	57473.5	63433.3
A2A994;B0QZL9;Q542V6;Q9JHG6;Q9JKK0	A2A994;B0QZL9;Q542V6;Q9JHG6;Q9JKK0	Rcan3;Rcan3;Rcan1;Rcan1;Rcan3	Regulator of calcineurin 3 (Fragment);Regulator of calcineurin 3 (Fragment);Calcipressin-1;Calcipressin-1;Calcipressin-3	3715.28	3844.56	5492.67		629.903	1954.56
A2A997;A2A998;Q8K182	A2A997;A2A998;Q8K182	C8a	Complement component 8, alpha polypeptide;Complement component 8, alpha polypeptide;Complement component C8 alpha chain	5238.12	143.359	552.322	1010.85	6.42988	801.51		581.955	747.569
A2A9C3	A2A9C3	Szt2	KICSTOR complex protein SZT2	3540.78	2271.11	3152.5	3206.27	1475.73	2569.39	2009.33	1725.64	1823.41
A2A9K7;Q14CE3;Q14CF7	A2A9K7;Q14CE3;Q14CF7	Cnksr1	Connector enhancer of kinase suppressor of Ras 1	7752.19	9904.59	6123.36	10357.8	9161.35	7413.95	4109.92	5553.32	4496.67
A2A9M4;A2A9M5;Q8R1A4	A2A9M4;A2A9M5;Q8R1A4	Dock7	Dedicator of cytokinesis 7;Dedicator of cytokinesis 7;Dedicator of cytokinesis protein 7	16120.1	17742	20399	32332.1	27352.9	26156.6	20690	18015.9	24689.2
A2A9N9;A2A9P0;P58058;Q3TN62;Q3UGI1	A2A9N9;A2A9P0;P58058;Q3TN62;Q3UGI1	Nadk	NAD kinase (Fragment);NAD kinase (Fragment);NAD kinase;NAD(+) kinase;NAD(+) kinase	80423.2	58140	81541	52697.9	58643.3	29828.3	32669.4	41667.2	41694.7
A2A9P6;P24788	A2A9P6;P24788	Cdk11b	Cyclin-dependent kinase 11B	99253.2	99826.8	89687.7	133067	135785	153423	86425.1	80381.6	82978.7
A2A9P8;B2RUG2;Q8R516	A2A9P8;B2RUG2;Q8R516	Mib2	RING-type E3 ubiquitin transferase (Fragment);RING-type E3 ubiquitin transferase;E3 ubiquitin-protein ligase MIB2	13769.2	12012.1	11667.2	9344	8043.23	9328.91	11119.8	11176.4	13172.5
A2A9Q2;A6PWC3;Q8BHG1	A2A9Q2;A6PWC3;Q8BHG1	Nrd1;Nrd1;Nrdc	Nardilysin, N-arginine dibasic convertase, NRD convertase 1;Nardilysin, N-arginine dibasic convertase, NRD convertase 1;Nardilysin	30816.3	31659.8	32118.6	21600.5	31855.6	29146.1	20354.1	16574.4	20406.5
A2AA85;Q6NXN1	A2AA85;Q6NXN1	Szrd1	SUZ domain-containing protein 1 (Fragment);SUZ domain-containing protein 1	9310.1	16133.4	15857.8	3076.86	2618.89	2434.17	7115.92	3867.56	4179.11
A2AAE1	A2AAE1	Bltp1	Bridge-like lipid transfer protein family member 1	11523.9	9496.49	12253.6	10027.8	11426	8499.81	9668.3	9959.25	11785.7
A2AAJ9	A2AAJ9	Obscn	Obscurin	399438	376071	363377	173509	186106	178733	276016	272131	268631
A2AAN0;A2AAN3;O35250;Q3TIP4;Q3USE0;Q542L0;Q69ZS4;Q7TPT3	A2AAN0;A2AAN3;O35250;Q3TIP4;Q3USE0;Q542L0;Q69ZS4;Q7TPT3	Exoc7;Exoc7;Exoc7;Exoc7;Exoc7;Exoc7;mKIAA1067;Exoc7	Exocyst complex component 7;Exocyst complex component 7 (Fragment);Exocyst complex component 7;Exocyst complex component 7;Exocyst complex component 7;Exocyst complex component 7;Exocyst complex component 7 (Fragment);Exocyst complex component 7	5621.43	5264.5	3561.18	4184.58	3666.34	3758.48	2564.05	2421.12	4292.35
A2AB59	A2AB59	Arhgap27	Rho GTPase-activating protein 27	5608.42	4698.13	4406.59	5668.68	5092.79	5238.65	1752.08	2778.95	2260.41
A2AB83;Q99PQ2	A2AB83;Q99PQ2	Trim11	Tripartite motif-containing 11;E3 ubiquitin-protein ligase TRIM11	2213.27		1951.13	7885.86	9427.06	7806.69		2240.26	632.721
A2ABG4;Q6PFC0;Q8BXD8	A2ABG4;Q6PFC0;Q8BXD8	Tbc1d16	TBC1 domain family, member 16;TBC1 domain family, member 16;Rab-GAP TBC domain-containing protein	9890.58	8018.73	8586.86	2095.59	1102.77		1561.13	6743.26	1233.82
A2ABU4	A2ABU4	Myom3	Myomesin-3	7407.39	8013.68	5910.73	2972.46	2216.82	2493.67	3103.68	1807.03	2726.15
A2ABV5;A2BDP0	A2ABV5;A2BDP0	Med14	Mediator of RNA polymerase II transcription subunit 14;Mediator complex subunit 14	3236.72	5744.45	4160.33			3261.88		1438.25	2815.06
A2ABX0;Q8CEB4	A2ABX0;Q8CEB4	Rbbp8nl	RBBP8 N-terminal like;DNA endonuclease Ctp1 N-terminal domain-containing protein	18280.9	21027.1	19221.7	34695.5	37113.4	30057.4	22233	21730.8	19388.5
A2ABY3;Q3TLU0;Q3USD5;Q540F5;Q922E4	A2ABY3;Q3TLU0;Q3USD5;Q540F5;Q922E4	Pcyt2;Pcyt2;Pcyt2;;Pcyt2	ethanolamine-phosphate cytidylyltransferase;ethanolamine-phosphate cytidylyltransferase;ethanolamine-phosphate cytidylyltransferase;ethanolamine-phosphate cytidylyltransferase;Ethanolamine-phosphate cytidylyltransferase				3088.44	2663.77
A2ABZ2;Q3TJ21;Q3TMZ1;Q3UTR5;Q922Q4;Q922W5	A2ABZ2;Q3TJ21;Q3TMZ1;Q3UTR5;Q922Q4;Q922W5	Pycr1;Pycr2;Pycr2;Pycr1;Pycr2;Pycr1	pyrroline-5-carboxylate reductase (Fragment);Pyrroline-5-carboxylate reductase;Pyrroline-5-carboxylate reductase;Pyrroline-5-carboxylate reductase;Pyrroline-5-carboxylate reductase 2;Pyrroline-5-carboxylate reductase 1, mitochondrial		419.539	445.504	801.67		1053.31			601.071
A2AC05;Q8VBT9	A2AC05;Q8VBT9	Aspscr1	Alveolar soft part sarcoma chromosome region, candidate 1 (human) (Fragment);Tether containing UBX domain for GLUT4	5595.5	9468.12	8254.63	3451.19	1674.76	3297.06	11173.7	6540.38	6669.52
A2AC19;O54864	A2AC19;O54864	Suv39h1	Histone-lysine N-methyltransferase;Histone-lysine N-methyltransferase SUV39H1	3401.8	852.183	3866	22646	24642.1	23064.1	19448.4	22994.1	21819
A2AC24;Q32P16;Q8K412;Q91V09	A2AC24;Q32P16;Q8K412;Q91V09	Wdr13	WD repeat domain 13 (Fragment);WD repeat domain 13;Memory-related protein;WD repeat-containing protein 13	6177.27	6208.45	7030.85	7689.94	7497	10982.6	6711.39	6154.46	5749.11
A2ACC6;A2ACC7;B2RRF1;E9Q0J2;F8WHN4;Q8BQZ4	A2ACC6;A2ACC7;B2RRF1;E9Q0J2;F8WHN4;Q8BQZ4	Ralgapb	Ral GTPase activating protein, beta subunit (non-catalytic);Ral GTPase activating protein, beta subunit (non-catalytic) (Fragment);B230339M05Rik protein;Ral GTPase activating protein, beta subunit (non-catalytic);Ral GTPase activating protein, beta subunit (non-catalytic);Ral GTPase-activating protein subunit beta	21193.8	19339.1	16776.2	9529.67	11926.4	14457.1	12002.5	13278.1	16083
A2ACG7;Q3U505;Q61833;Q9DBG6	A2ACG7;Q3U505;Q61833;Q9DBG6	Rpn2	Dolichyl-diphosphooligosaccharide--protein glycosyltransferase subunit 2;Dolichyl-diphosphooligosaccharide--protein glycosyltransferase subunit 2 (Fragment);Dolichyl-diphosphooligosaccharide--protein glycosyltransferase subunit 2;Dolichyl-diphosphooligosaccharide--protein glycosyltransferase subunit 2	12657	13080.6	13406.6	6966.57	7566.54	6683.42	15483.1	6900.19	5402.47
A2ACH6;P82347;Q544D4;Q8C8D9	A2ACH6;P82347;Q544D4;Q8C8D9	Sgcd;Sgcd;Sgcd;	Sarcoglycan, delta (dystrophin-associated glycoprotein);Delta-sarcoglycan;Sarcoglycan, delta (Dystrophin-associated glycoprotein);Delta-sarcoglycan	9342.57	11558.3	13282.1	8048.02	10361.7	13967.7	7209.99	8409.88	9400.8
A2ACV6;E1U8D0;Q69ZW6;Q8CBB8	A2ACV6;E1U8D0;Q69ZW6;Q8CBB8	Soga1	Suppressor of glucose, autophagy associated 1;Protein SOGA1;MKIAA0889 protein (Fragment);DUF4482 domain-containing protein (Fragment)	90745.9	84263.8	75919.8	98749.9	102141	113067	56324.4	49172.1	59096.3
A2AD03;Q3UR39;Q9QXG2	A2AD03;Q3UR39;Q9QXG2	Chm	Rab proteins geranylgeranyltransferase component A;Rab proteins geranylgeranyltransferase component A;Rab proteins geranylgeranyltransferase component A 1	18136.5	9561.89	14483.9	14678.3	14007.5	12014.2	9833.18	6807.95	6206.83
A2AD84;A2AD85;Q99JT2	A2AD84;A2AD85;Q99JT2	Stk26	Serine/threonine kinase 26;Protein kinase domain-containing protein;Serine/threonine-protein kinase 26	2142.55	894.575	1123.05	5124.35	1652.53	1702.91	1225.05	1247	3086.64
A2ADA6;Q3UH98;Q4QQN0;Q6NXL5	A2ADA6;Q3UH98;Q4QQN0;Q6NXL5	Acap3	Arf-GAP with coiled-coil, ANK repeat and PH domain-containing protein;Arf-GAP with coiled-coil, ANK repeat and PH domain-containing protein;Arf-GAP with coiled-coil, ANK repeat and PH domain-containing protein;Arf-GAP with coiled-coil, ANK repeat and PH domain-containing protein	4114.41	5749.92	4784.45	6923.38	6522.58	7404.33	6522.83	7732.44	5077.76
A2ADB0;A2ADB1	A2ADB0;A2ADB1	Spen	Spen family transcription repressor	1730.14		3960.18	4364.03	3656.9	4701.48	4589.59	4474.71	5754.16
A2ADY9	A2ADY9	Ddi2	Protein DDI1 homolog 2	16557.9	5768.02	14175.1	10049	10055.8	11783.6	8643.67	15572.7	15442.2
A2AE27;Q9DBT5	A2AE27;Q9DBT5	Ampd2	AMP deaminase;AMP deaminase 2	15529.5	14189.6	13806.3	2749.89	6649.03	5861.7	12277.2	10943.1	10512.6
A2AE89;P10649	A2AE89;P10649	Gstm1	glutathione transferase;Glutathione S-transferase Mu 1	27103.9	27930.2	28893	5546.93	6810.64	6152.83	9718.31	9852.51	10718.9
A2AE94;A2AE95;Q6KAP5	A2AE94;A2AE95;Q6KAP5	Sytl1	Synaptotagmin-like 1;Synaptotagmin-like 1;MFLJ00227 protein (Fragment)	76174.7	83880.3	72191.4	79664.3	89925.4	84572.4	48494.8	52721.7	54165.9
A2AE98;Q80ZK9;Q8JZZ2	A2AE98;Q80ZK9;Q8JZZ2	Wdtc1	WD and tetratricopeptide repeats 1;WD and tetratricopeptide repeats protein 1;Wdtc1 protein	29823.7	29056.1	35353.3	23793.2	26774.1	23091.2	19699.6	21889.8	18166.5
A2AEC2;Q14C38;Q8CCT4;Q8R0A5;Q9DB24	A2AEC2;Q14C38;Q8CCT4;Q8R0A5;Q9DB24	Tceal3;Tceal5;Tceal5;Tceal3;Tceal6	Transcription elongation factor A (SII)-like 3 (Fragment);Transcription elongation factor A (SII)-like 5;Transcription elongation factor A protein-like 5;Transcription elongation factor A protein-like 3;Transcription elongation factor A (SII)-like 6	875.593		474.967	13569.3	11507.2	13055	13895.3	12961.7	13357.2
A2AEG2;Q80Z25	A2AEG2;Q80Z25	Ofd1	OFD1, centriole and centriolar satellite protein;Centriole and centriolar satellite protein OFD1	5342.96	3441.18	4806.79	2813.16	2732.91	2325.52	2598.45	1111	1978.71
A2AEG6;P35803;Q3US81	A2AEG6;P35803;Q3US81	Gpm6b	Glycoprotein m6b;Neuronal membrane glycoprotein M6-b;Neuronal membrane glycoprotein M6-b					4784.32	3457.87		3987.26	3116.29
A2AEM2;Q99LI2	A2AEM2;Q99LI2	Clcc1	Chloride channel CLIC-like protein 1							1062.85
A2AES4;A2AES5;Q3U2S4	A2AES4;A2AES5;Q3U2S4	Otud5	ubiquitinyl hydrolase 1;ubiquitinyl hydrolase 1;OTU domain-containing protein 5	343.5	1381.69	1827.35	1653.35	2146.05	1183.35	1630.38	1532.85	1791.54
A2AEV7	A2AEV7	Ccdc120	Coiled-coil domain-containing protein 120	17396.8	23515.9	15568.8	11775.6	11711	15452.9	12489.6	8423.89	12380
A2AEW0;A2AEW1;Q3U1L5;Q64092	A2AEW0;A2AEW1;Q3U1L5;Q64092	Tfe3	Transcription factor E3;Transcription factor E3;BHLH domain-containing protein (Fragment);Transcription factor E3	7869.82	6651.39	8232.67	29221.1	28644.3	28373.3	19713.4	19708.1	17990.4
A2AEX0;Q03719	A2AEX0;Q03719	Kcnd1	Potassium voltage-gated channel, Shal-related family, member 1;Potassium voltage-gated channel subfamily D member 1			2315.2	832.527		4184.26		3845.69
A2AEX6;A2AEX8;P97447	A2AEX6;A2AEX8;P97447	Fhl1	Four and a half LIM domains 1;Four and a half LIM domains 1;Four and a half LIM domains protein 1	15943.4	13513.8	14387.5	7839.99	9664.55	9303.57	1340.29	952.441	1766.56
A2AFG7;A2AFG8	A2AFG7;A2AFG8	L1cam	L1 cell adhesion molecule	33664.7	36016.8	37103.6	17062.8	17486.1	22156.2	15613.4	14941.3	12178
A2AFI9;A2AFJ1;Q3UJI2;Q60973;Q8C5H3	A2AFI9;A2AFJ1;Q3UJI2;Q60973;Q8C5H3	Rbbp7	Retinoblastoma binding protein 7, chromatin remodeling factor;Retinoblastoma binding protein 7, chromatin remodeling factor;Histone-binding protein RBBP4 N-terminal domain-containing protein;Histone-binding protein RBBP7;Histone-binding protein RBBP4 N-terminal domain-containing protein	7113.99	6135.56	10385.5	8952.21	9308.47	9388.15	7411.17	10530.4	10175.9
A2AFK7;Q91VC3	A2AFK7;Q91VC3	Eif4a3	RNA helicase (Fragment);Eukaryotic initiation factor 4A-III	2132.78	1179.66	1223.67	10448.6	11198.8	9496.42	8899.27	10533.4	8535.16
A2AFQ0;Q4JG03;Q7TMY8	A2AFQ0;Q4JG03;Q7TMY8	Huwe1	HECT-type E3 ubiquitin transferase;HECT-type E3 ubiquitin transferase;E3 ubiquitin-protein ligase HUWE1	194990	190022	184034	206271	196313	204677	163849	160104	203753
A2AFQ9;B2RQ83;Q6KAS0;Q8BX17	A2AFQ9;B2RQ83;Q6KAS0;Q8BX17	Gemin5	Gem nuclear organelle associated protein 5;Gem (Nuclear organelle) associated protein 5;MFLJ00137 protein (Fragment);Gem-associated protein 5	33834.9	28376.5	31157.6	45259.6	43707.5	41815.9	28149.9	26484.3	29063.2
A2AFW6;Q05C68;Q3UA17;Q791V5;Q9D050	A2AFW6;Q05C68;Q3UA17;Q791V5;Q9D050	Mtch2	Mitochondrial carrier 2;Mtch2 protein (Fragment);Mitochondrial carrier homolog 2;Mitochondrial carrier homolog 2;Mitochondrial carrier 2	148.322	180.979
A2AG46;Q3TFU3;Q99PB4;Q9ER67	A2AG46;Q3TFU3;Q99PB4;Q9ER67	Maged2	MAGE family member D2 (Fragment);MAGE domain-containing protein;Mage-d2;MAGE family member D2	1045.12	305.509	456.432	575.319	938.616	913.257	3192.43	3122.07	2674.11
A2AG58	A2AG58	Bclaf3	BCLAF1 and THRAP3 family member 3	8776.88	9049.14	7576.26	10291.2	9271.54	9313.61	8753.94	10258.4	8855.83
A2AG68;B9EJ97;Q64430	A2AG68;B9EJ97;Q64430	Atp7a	P-type Cu(+) transporter;P-type Cu(+) transporter;Copper-transporting ATPase 1	7399.68	12100.6	10684	13637.9	13769.6	13642.6	5841.06	8904.25	11391.5
A2AGH6;A2AGH8;A2AGH9	A2AGH6;A2AGH8;A2AGH9	Med12	Mediator of RNA polymerase II transcription subunit 12;Mediator complex subunit 12;Mediator complex subunit 12	29238.3	28540.3	30401.6	24591.2	22587.4	20147.5	21418.2	17973.5	23765.7
A2AGJ2;Q9DCV4	A2AGJ2;Q9DCV4	Rmdn1	Regulator of microtubule dynamics 1;Regulator of microtubule dynamics protein 1	4446.49	5201.33	6222.45					495.122	835.812
A2AGN7;B7ZCF1;O88685;Q3TKC2;Q8BUP7	A2AGN7;B7ZCF1;O88685;Q3TKC2;Q8BUP7	Psmc3	Proteasome (prosome, macropain) 26S subunit, ATPase 3;Proteasome (prosome, macropain) 26S subunit, ATPase 3;26S proteasome regulatory subunit 6A;AAA+ ATPase domain-containing protein;AAA+ ATPase domain-containing protein	1791.44	2859.41	2175.05	2474.69	3062.73	2455.52	8672.49	3134.4	5084.39
A2AGS2;P70236;Q3UU57;Q543Z5;Q8BP44;Q8C371	A2AGS2;P70236;Q3UU57;Q543Z5;Q8BP44;Q8C371	Map2k6;Map2k6;Map2k6;Map2k6;Map2k6;	Mitogen-activated protein kinase kinase 6;Dual specificity mitogen-activated protein kinase kinase 6;Protein kinase domain-containing protein (Fragment);Protein kinase domain-containing protein;Protein kinase domain-containing protein;Protein kinase domain-containing protein	7360.87	16661.2	4841.16	7475.36	6093.04	6235.88	9215.29	8485.87	6206.86
A2AGS6;Q4QQM4	A2AGS6;Q4QQM4	Trp53i11	Tumor protein p53-inducible protein 11 (Fragment);Tumor protein p53-inducible protein 11	10422.3	10707.7	5645.84	11616.1	7797.12	7732.44	7601.16	11964.1	11340.9
A2AH22	A2AH22	Ambra1	Activating molecule in BECN1-regulated autophagy protein 1	3435.72	3044.29	4176.8	598.576	2306	1696.12	2673.7	3468.36	3083.34
A2AH25;Q5FWK3;Q8BQW4	A2AH25;Q5FWK3;Q8BQW4	Arhgap1	Rho GTPase activating protein 1;Rho GTPase-activating protein 1;Rho GTPase-activating protein 1	135307	137365	117261	50301.8	57547.1	52314.9	73730.5	66523.9	73645.9
A2AH27;A2AH28;A2AH29;A2AH30;Q8BVU5	A2AH27;A2AH28;A2AH29;A2AH30;Q8BVU5	Nudt9	Nudix (nucleoside diphosphate linked moiety X)-type motif 9 (Fragment);Nudix (nucleoside diphosphate linked moiety X)-type motif 9 (Fragment);Nudix (nucleoside diphosphate linked moiety X)-type motif 9 (Fragment);Nudix (nucleoside diphosphate linked moiety X)-type motif 9 (Fragment);ADP-ribose pyrophosphatase, mitochondrial		1113.02	374.981	1340.47		1187.42	1241.35	1167.92	1283.38
A2AH75	A2AH75	Kif1b	Kinesin family member 1B	1058.1	1563.37	1709.6	2458.79	1621.17	2448.14	1934.83	3616.38	811.078
A2AH85;G3UZ34;O08810;Q3TMY8;Q3U5Q3;Q543F1;Q6A0E3;Q7TMX4	A2AH85;G3UZ34;O08810;Q3TMY8;Q3U5Q3;Q543F1;Q6A0E3;Q7TMX4	Eftud2	116 kDa U5 small nuclear ribonucleoprotein component;116 kDa U5 small nuclear ribonucleoprotein component;116 kDa U5 small nuclear ribonucleoprotein component;116 kDa U5 small nuclear ribonucleoprotein component;116 kDa U5 small nuclear ribonucleoprotein component;116 kDa U5 small nuclear ribonucleoprotein component;116 kDa U5 small nuclear ribonucleoprotein component (Fragment);116 kDa U5 small …	633.826	694.497		162.014	513.075	330.91
A2AHJ4	A2AHJ4	Brwd3	Bromodomain and WD repeat-containing protein 3		3110.08	1476.83	4137.42	1153.64	2080.87	1487.36	442.608
A2AHQ7;Q8BWJ3	A2AHQ7;Q8BWJ3	Phka2	Phosphorylase b kinase regulatory subunit;Phosphorylase b kinase regulatory subunit alpha, liver isoform	37645.5	11355.5	4153.68		8964.7	5301.29	31777.1
A2AI08	A2AI08	Tprn	Taperin	10163	10160.2	10637.4	3997.37	4421.41	4124.11	6373.72	5266.72	5805.25
A2AI52;Q3UQ26;Q3UZ62;Q80U87	A2AI52;Q3UQ26;Q3UZ62;Q80U87	Usp8	ubiquitinyl hydrolase 1;Ubiquitin carboxyl-terminal hydrolase (Fragment);ubiquitinyl hydrolase 1;Ubiquitin carboxyl-terminal hydrolase 8	22723.5	21886.9	34389.8	37478.6	37843.4	32756.5	20090.3	19603.1	14789.5
A2AI57;B9EK83;Q923J1	A2AI57;B9EK83;Q923J1	Trpm7	non-specific serine/threonine protein kinase;non-specific serine/threonine protein kinase;Transient receptor potential cation channel subfamily M member 7	10856.9	12898.5	11267.3	10230	11885.3	8791.08	8769.12	9702.82	7658.09
A2AIK5;O35137	A2AIK5;O35137	Alx4	Aristaless-like homeobox 4;Homeobox protein aristaless-like 4	5006.1	2824.5	6228.97	19069.1	18752.5	21507.8	13064.7	13380.5	15940.1
A2AIR2;Q5DTM8	A2AIR2;Q5DTM8	Rnf20	E3 ubiquitin protein ligase (Fragment);E3 ubiquitin-protein ligase BRE1A	12606.1	38183.7	18544.4	5710.13	5934.39	5318.01	2356.75	2897.09	5504.25
A2AIV2;E9PZY8	A2AIV2;E9PZY8	Virma	Protein virilizer homolog;Vir like m6A methyltransferase associated	192148	183522	153049	141522	106659	114067	68446.3	82450	97547.2
A2AIV6;Q8BP86	A2AIV6;Q8BP86	Snapc4	Small nuclear RNA activating complex, polypeptide 4;snRNA-activating protein complex subunit 4				363.518		1093
A2AIW0;A2AIW3	A2AIW0;A2AIW3	Entr1	Endosome-associated-trafficking regulator 1	4552.44	9278.17	5438.73	2308.47	3755.87	3033.98	5108.75	2907.68	777.052
A2AIW9;Q3TTM6;Q3TY06;Q3UDE0;Q8BK51;Q9DC61	A2AIW9;Q3TTM6;Q3TY06;Q3UDE0;Q8BK51;Q9DC61	Pmpca	Peptidase (mitochondrial processing) alpha;Uncharacterized protein;Uncharacterized protein (Fragment);Uncharacterized protein (Fragment);Uncharacterized protein;Mitochondrial-processing peptidase subunit alpha	524.162	1149.49	1129.11		2740.28	2633.16	618.701	5172.22	581.538
A2AIX0;Q3TZ34;Q9JII1	A2AIX0;Q3TZ34;Q9JII1	Inpp5e	Inositol polyphosphate-5-phosphatase E;Inositol polyphosphate-related phosphatase domain-containing protein;Phosphatidylinositol polyphosphate 5-phosphatase type IV				1806.32	2267.54	3527.42
A2AJ26;P41234;Q6ZPZ4	A2AJ26;P41234;Q6ZPZ4	Abca2	ATP-binding cassette, sub-family A (ABC1), member 2;ATP-binding cassette sub-family A member 2;MKIAA1062 protein (Fragment)	7553.78	3932.12	6918.66	4059.36	4738.19	4269.62		1930.94	2146.64
A2AJ88;A7L8D7	A2AJ88;A7L8D7	Pnpla7	Patatin-like phospholipase domain-containing protein 7;NTE-related esterase (Fragment)	1897.69	75019.2	4299.54	22502	6373.16	21852.2		3068.07	61875.7
A2AJH3;O70311;Q3THR4	A2AJH3;O70311;Q3THR4	Nmt2	Glycylpeptide N-tetradecanoyltransferase;Glycylpeptide N-tetradecanoyltransferase 2;Glycylpeptide N-tetradecanoyltransferase	11590.2	9883.37	11538.3	13167.1	14833.4	10625.1	8820.34	7666.83	8668.48
A2AJI0;A8Y5P4	A2AJI0;A8Y5P4	Map7d1	MAP7 domain-containing protein 1;MAP7 domain containing 1	15280.6	14939.7	13821.1	13727	13498.9	12738.4	17871.5	15383.6	16266.2
A2AJK6	A2AJK6	Chd7	Chromodomain-helicase-DNA-binding protein 7	21880.9	24368.7	26476.6	27342	32114.6	31255.9	20275.1	24055.9	20730.8
A2AJT4;A2AJT5;B2RUA1	A2AJT4;A2AJT5;B2RUA1	Pnisr	Arginine/serine-rich protein PNISR;PNN interacting serine/arginine-rich;Splicing factor, arginine/serine-rich 18	14048.1	12127.6	11873.4	14749.1	11948.8	11882.5	8416.09	6967.37	7238.56
A2AJW4	A2AJW4	Ppp1r3d	Protein phosphatase 1 regulatory subunit	34723.8	16909.8	18497.2	21231.5	8632.6	2234.75	11460	3624.66	9752.73
A2AJY2;A2AJY5;A2AJY7;O35206	A2AJY2;A2AJY5;A2AJY7;O35206	Col15a1	Collagen, type XV, alpha 1;Collagen, type XV, alpha 1;Collagen, type XV, alpha 1;Collagen alpha-1(XV) chain	1968.11	918.903	1609.46	403.047	552.014	887.956	1903.6	1581.73	756.826
A2AKA9;Q3TUI3;Q4G5Y4;Q5CCJ9;Q8K2F0	A2AKA9;Q3TUI3;Q4G5Y4;Q5CCJ9;Q8K2F0	Brd3	Bromodomain containing 3 (Fragment);Bromodomain-containing protein 3;Endothelial differentiation inhibitory protein D18;Orfx protein;Bromodomain-containing protein 3	567307	267837	174349	349724	527168	386570	444421	413929	200626
A2AKB9	A2AKB9	Dcaf10	DDB1- and CUL4-associated factor 10	43927.5	36961.5	45737.2	59090.4	74239.3	59783.9	33355.6	33370.8	37687.3
A2AKD7;Q3UVD6;Q61234	A2AKD7;Q3UVD6;Q61234	Snta1	Syntrophin, acidic 1;Alpha-1-syntrophin;Alpha-1-syntrophin	70431	76053.4	60468.5	23900.3	37700.9	33053.4	40249.4	42159.8	46872.8
A2AKH4;B0R030;O09044;Q9D3L3	A2AKH4;B0R030;O09044;Q9D3L3	Snap23	Synaptosomal-associated protein;Synaptosomal-associated protein (Fragment);Synaptosomal-associated protein 23;Synaptosomal-associated protein	161813	167209	169858	81347.8	88272.2	94258.8	124662	147200	126756
A2AKN8;A2AKN9;A2BIM8;A2BIN0;A2BIN1;A2CEK6;A2CEK7;A2CEK9;A2CEL1;A2CGB6;A9R9W0;B0V388;B5TE76;B5X0G0;B5X0G2;B8JI96;P02762;P04938;P11588;P11589;P11591;Q4FZE8;Q58ES8;Q58EV3;Q8JZT0;Q9CXU6;Q9D0H8	A2AKN8;A2AKN9;A2BIM8;A2BIN0;A2BIN1;A2CEK6;A2CEK7;A2CEK9;A2CEL1;A2CGB6;A9R9W0;B0V388;B5TE76;B5X0G0;B5X0G2;B8JI96;P02762;P04938;P11588;P11589;P11591;Q4FZE8;Q58ES8;Q58EV3;Q8JZT0;Q9CXU6;Q9D0H8	Mup8;Mup2;Mup18;Mup11;Mup10;Mup13;Mup14;Mup1;Mup1;Mup6;Mup15;CU041261.1-001;Mup17;Mup13;Mup17;Mup14;Mup6;Mup11;Mup1;Mup2;Mup5;Mup22;Mup1;Mup7;;;	Major urinary protein 5;Major urinary protein 2;Major urinary protein 18;Major urinary protein 11;Major urinary protein 10;Major urinary protein 11;Major urinary protein 12;Major urinary protein 1 (Fragment);Major urinary protein 1;Major urinary protein 6;Major urinary protein 15;Novel member of the major urinary protein (Mup) gene family;Major urinary protein 14;Major urinary protein 13;Major ur…	765.521	839.951	1565.74	1066.75	1525.17	873.268	1288.65	642.234
A2AKU9;Q3UD06;Q8C2Q8;Q91VR2;Q9D9D7	A2AKU9;Q3UD06;Q8C2Q8;Q91VR2;Q9D9D7	Atp5c1;Atp5c1;Atp5c1;Atp5f1c;Atp5c1	ATP synthase subunit gamma;ATP synthase subunit gamma;ATP synthase subunit gamma;ATP synthase subunit gamma, mitochondrial;ATP synthase subunit gamma	3199.06	3641.62	1778.11	1302.07	3927.8	1882.78	1308.54	1903.46	2582.43
A2AKV6;A2AKV7;Q8K1E6	A2AKV6;A2AKV7;Q8K1E6	Alkbh3	AlkB homolog 3, alpha-ketoglutarate-dependent dioxygenase;AlkB homolog 3, alpha-ketoglutarate-dependent dioxygenase (Fragment);Alpha-ketoglutarate-dependent dioxygenase alkB homolog 3	9589.32
A2AL36;A2AS42;B2RXX1;E9Q9E7;F6QP53;R4GML3;R4GML4	A2AL36;A2AS42;B2RXX1;E9Q9E7;F6QP53;R4GML3;R4GML4	Cntrl	Centriolin;Centriolin;Cep110 protein;Centriolin;Centriolin (Fragment);Centriolin;Centriolin (Fragment)	1893.09	114800	103177	183756		179427		91019.3	1112.14
A2AL76;A2AL77;A2AL78;Q8CH79;Q920F8;Q9CR06;Q9D7J8;Q9EQ62	A2AL76;A2AL77;A2AL78;Q8CH79;Q920F8;Q9CR06;Q9D7J8;Q9EQ62	Asph	Aspartate-beta-hydroxylase;Aspartate-beta-hydroxylase (Fragment);Aspartate-beta-hydroxylase;Junctin-2;Cardiac junctate 2;Aspartate-beta-hydroxylase;Aspartyl beta-hydroxylase/Triadin domain-containing protein;Aspartyl beta-hydroxylase cardiac isoform 2 (Fragment)	5908.83	5922.17	4624.11	981.826	1408.84	849.016	1521.72	1410.16	1335.17
A2AL85;Q8BQK0;Q8BSY0;Q8CBM2;Q9EQ66	A2AL85;Q8BQK0;Q8BSY0;Q8CBM2;Q9EQ66	Asph;Asph;Asph;Asph;ASPH	Aspartate-beta-hydroxylase;Uncharacterized protein;Aspartyl/asparaginyl beta-hydroxylase;Aspartate-beta-hydroxylase;Aspartly beta-hydroxylase	141923	145756	136778	86675.8	66540.2	94295.5	78331.3	76248.1	91223.9
A2ALK8	A2ALK8	Ptpn3	Tyrosine-protein phosphatase non-receptor type 3	9663.7	262.685	3221.34	24370.2	19472	5777.32	1960.9	2441.99
A2ALL9;Q0VF54	A2ALL9;Q0VF54	Atp2b3	Calcium-transporting ATPase	2080.15	1263.08	2352.13	3047.16	2750.59	1856.47	5251.13	2206.58	3244.98
A2ALU4;A7TU71	A2ALU4;A7TU71	Shroom2	Protein Shroom2;SHROOM2	15427	13710.5	14649.9	18565	14727.2	22019.9	14351.1	19312.5	19671.5
A2AM95;I7HJS1;O08579	A2AM95;I7HJS1;O08579	Emd	Emerin	3951.83	15479.3	6359.03	2545.5	3017.73	4035.58	1183.95	671.991	300.682
A2AM97;I7HLV2;Q3THJ6;Q6ZWV3	A2AM97;I7HLV2;Q3THJ6;Q6ZWV3	RP23-436K3.4-001;Rpl10;;Rpl10	Ribosomal protein 10;Ribosomal protein 10 (Fragment);Ribosomal protein L10e/L16 domain-containing protein;Large ribosomal subunit protein uL16	99509.8	81963.5	131034	20336.5	17411	17465.5	48017.8	43503.8	45058.1
A2AMH5	A2AMH5	Slc44a1	Choline transporter-like protein	5654.49	8137.81	4399.26	5724.49	7205.35		3920.93		8704.01
A2AMM0	A2AMM0	Cavin4	Caveolae-associated protein 4	169264	210349	179673	109024	111587	138873	95500.8	97613.8	122389
A2AMU9;A2AMV1;Q9D0I8	A2AMU9;A2AMV1;Q9D0I8	Mrto4	Ribosome assembly factor mrt4;Ribosome assembly factor mrt4;mRNA turnover protein 4 homolog						1124.95
A2AMW0;Q3TRH8;Q3TVK4;Q923G3	A2AMW0;Q3TRH8;Q3TVK4;Q923G3	Capzb	F-actin-capping protein subunit beta	1375.46	1478.46	331.212	1735.52	1004.2	1793.08		412.125
A2AN08	A2AN08	Ubr4	E3 ubiquitin-protein ligase UBR4	98663.1	116491	134743	62755.7	59251.3	64017.4	65064.8	78747	82859.5
A2AN37;F7CBX2;P52623	A2AN37;F7CBX2;P52623	Uck1	Uridine-cytidine kinase;uridine/cytidine kinase (Fragment);Uridine-cytidine kinase 1	4958.29	5037.33	4115.68	2534.02	2714.43	1101.94	6686.4	3606.96	3827.07
A2ANT9;E9PUD3;Q6GQX6	A2ANT9;E9PUD3;Q6GQX6	Anks6	Ankyrin repeat and sterile alpha motif domain containing 6;Ankyrin repeat and sterile alpha motif domain containing 6;Ankyrin repeat and SAM domain-containing protein 6	1945.55	4186.62	3334.21	2486.17		818.978	1414.8	1735.67	366.811
A2ANY6;J3QMC5	A2ANY6;J3QMC5	Mdn1	Midasin	6110.71	6035.4	5241.81	4677.38	2626.62	4481.17	2987.93	2498.59	2534.45
A2AP82;Q6NZA9	A2AP82;Q6NZA9	Taf9b	TATA-box binding protein associated factor 9B;Transcription initiation factor TFIID subunit 9B	5765.56	3953.34	5768.18	3582.99	3752.45	5400.83	14123.7	9914.71	14309.3
A2AP88;Q8BYK8	A2AP88;Q8BYK8	Zc3h6	Zinc finger CCCH type containing 6;Zinc finger CCCH domain-containing protein 6	293.111				291.056	5.42789	377.341
A2AP92;A2AP93;Q3TXG1;Q543B5;Q62073;Q923A8	A2AP92;A2AP93;Q3TXG1;Q543B5;Q62073;Q923A8	Map3k7	Mitogen-activated protein kinase kinase kinase 7	6602.31	5538.07	3861.48	16551.3	15547.8	14936.8	12875.3	13104.1	13670.1
A2APB8;Q8BTJ3;Q9CT36	A2APB8;Q8BTJ3;Q9CT36	Tpx2	Targeting protein for Xklp2;Targeting protein for Xklp2;Targeting protein for Xklp2 (Fragment)		1512.66	2020.91	6256.13	5772.39	5206.78	12487.5	7310.82	10016.6
A2APF7;Q9QY24	A2APF7;Q9QY24	Zbp1	Z-DNA binding protein 1;Z-DNA-binding protein 1	7523.2	8027.96	7710.09	2948.85	2750.33	2660.27	1474.99	4413.6	2412.37
A2APM1;A2APM2;A2APM3;A2APM4;A2APM5;E9QKM8;P15379;Q3TLT9;Q3U468;Q3U8S1;Q3UNN2;Q80X37	A2APM1;A2APM2;A2APM3;A2APM4;A2APM5;E9QKM8;P15379;Q3TLT9;Q3U468;Q3U8S1;Q3UNN2;Q80X37	Cd44	CD44 antigen	36755.2	40469.7	42453.1	15096.3	17206.1	17652.7	7261.8	6076.66	7506.6
A2APV2;A2AQW2;E9PXE6;F8VPR2	A2APV2;A2AQW2;E9PXE6;F8VPR2	Fmnl2	Formin-like protein 2;Formin-like 2;Formin-like 2;Formin-like 2	7170.95	6630.75	8282.61	11590.8	11226.5	9477.57	10870.8	9934.23	11640.6
A2APX3;P21460;Q3U5K7;Q9EPX9	A2APX3;P21460;Q3U5K7;Q9EPX9	Cst3	Cystatin C (Fragment);Cystatin-C;Cystatin domain-containing protein (Fragment);Cystatin C	5085.08	2720.03	6520.61	309.292	97.8809	351.247	469.021	1354.61	428.172
A2APY6;B2RXU2;Q3V1V3	A2APY6;B2RXU2;Q3V1V3	Esf1	ESF1, nucleolar pre-rRNA processing protein, homolog (S. cerevisiae);ESF1, nucleolar pre-rRNA processing protein, homolog (S. cerevisiae);ESF1 homolog	5346.49	4817.33	6876.84	22248.2	20105.4	27007.9	12246.5	10891.3	18166.5
A2AQ07	A2AQ07	Tubb1	Tubulin beta-1 chain	2198.2	6342.8	5786.96	9647.03	8066.05	12896.3	1121.9	3435.37
A2AQ25;E9QAU4	A2AQ25;E9QAU4	Skt;Etl4	Sickle tail protein;Enhancer trap locus 4	19672.1	20132.3	19317.2	23402.6	23454.3	23374.1	22431.6	22507.5	21439.6
A2AQA7;Q8CFQ3	A2AQA7;Q8CFQ3	Aqr	RNA helicase aquarius	110964	392.518	6146		205810				32876.5
A2AQD5;A2AQD6;Q922B9	A2AQD5;A2AQD6;Q922B9	Itprid2	ITPR interacting domain containing 2;ITPR interacting domain containing 2;Protein ITPRID2	47180	52970.4	45031	56228.2	58708.6	53863.9	40142.2	50132.7	46441.8
A2AQE9;G3UXC3;P16951;Q3UT24;Q543G2;Q640L6;Q8CBR9;Q8CGB4	A2AQE9;G3UXC3;P16951;Q3UT24;Q543G2;Q640L6;Q8CBR9;Q8CGB4	Atf2	Activating transcription factor 2 (Fragment);Cyclic AMP-dependent transcription factor ATF-2;Cyclic AMP-dependent transcription factor ATF-2;Cyclic AMP-dependent transcription factor ATF-2;Activating transcription factor 2;Atf2 protein;Cyclic AMP-dependent transcription factor ATF-2;Atf2 protein	3204.8	1746.23	746.901	479.574	1870.55	440.321	11991.9	1635.62
A2AQJ5;A2AQJ6;Q8BXN9	A2AQJ5;A2AQJ6;Q8BXN9	Tmem87a	Transmembrane protein 87A				1371.34	5159.51	874.021
A2AQL0;G1JLS7;Q3V256;Q9Z1W9	A2AQL0;G1JLS7;Q3V256;Q9Z1W9	Stk39	non-specific serine/threonine protein kinase;non-specific serine/threonine protein kinase;non-specific serine/threonine protein kinase;STE20/SPS1-related proline-alanine-rich protein kinase	2155.24	1992.96	1450.94	532.105	1453.01	3248.34	3269.47	1239.39	1998.07
A2AQN4;A2AQN5;Q8C113;Q8C141;Q8C1A8;Q8N9U3;Q9QXG4	A2AQN4;A2AQN5;Q8C113;Q8C141;Q8C1A8;Q8N9U3;Q9QXG4	Acss2;Acss2;;Acss2;Acss2;Acss2;Acss2	propionate--CoA ligase;propionate--CoA ligase;propionate--CoA ligase;propionate--CoA ligase;propionate--CoA ligase;propionate--CoA ligase;Acetyl-coenzyme A synthetase, cytoplasmic	1.36055e+06	1.4475e+06	1.3345e+06	1.15146e+06	1.12806e+06	1.08106e+06	892377	912870	827241
A2AQN9;P51855;Q3TF63;Q3TWM2;Q541E2;Q8R436	A2AQN9;P51855;Q3TF63;Q3TWM2;Q541E2;Q8R436	Gss;Gss;Gss;Gss;Gss;	Glutathione synthetase (Fragment);Glutathione synthetase;Glutathione synthetase;Glutathione synthetase;Glutathione synthetase (Fragment);Glutathione synthetase (Fragment)
A2AQR0;Q64521	A2AQR0;Q64521	Gpd2	Glycerol-3-phosphate dehydrogenase;Glycerol-3-phosphate dehydrogenase, mitochondrial	71449.3	5864.51	3588.9	37592	45890.8	33038	36396.5	39738.7	18638.7
A2AR02	A2AR02	Ppig	Peptidyl-prolyl cis-trans isomerase G	13611.1	6649.98	9285.55	2619.42	2286.38	6551.67	5958.62	4921.79	6850.63
A2ARJ0;P70297;Q3TQ49;Q3UGN9;Q3UMC8	A2ARJ0;P70297;Q3TQ49;Q3UGN9;Q3UMC8	Stam	Signal transducing adaptor molecule (SH3 domain and ITAM motif) 1 (Fragment);Signal transducing adapter molecule 1;Signal transducing adapter molecule 1;Signal transducing adaptor molecule (SH3 domain and ITAM motif) 1;Signal transducing adapter molecule 1		1929.72	2072.4		2361.77	1840.31		3640.72	1456.02
A2ARP1;B9EHS3	A2ARP1;B9EHS3	Ppip5k1	Inositol hexakisphosphate and diphosphoinositol-pentakisphosphate kinase 1;Inositol hexakisphosphate and diphosphoinositol-pentakisphosphate kinase	8777.49	7664.41	7809.73	8297.26	5161.01	5708.68	7719.14	7103.38	4472.08
A2ARP5;P30275;Q545N7	A2ARP5;P30275;Q545N7	Ckmt1	creatine kinase (Fragment);Creatine kinase U-type, mitochondrial;creatine kinase	4256.64	1359.59	2285.8	1541.66	1762.37	1425.55	1101.66	979.25
A2ARP8;Q9QYR6	A2ARP8;Q9QYR6	Map1a	Microtubule-associated protein 1 A;Microtubule-associated protein 1A	67123.7	73715.9	65245.7	44948.1	52813.6	50857.1	33110.5	38193.2	41826
A2AS45;Q68FH0	A2AS45;Q68FH0	Pkp4	Plakophilin 4;Plakophilin-4	30785.7	18258.6	18109	20259.7	14774.9	15560.5	15703.5	18576	16904.7
A2AS70;A2AS72;O54826;Q5DTL6;Q8C7B0	A2AS70;A2AS72;O54826;Q5DTL6;Q8C7B0	Mllt10	Myeloid/lymphoid or mixed-lineage leukemia; translocated to, 10;Myeloid/lymphoid or mixed-lineage leukemia; translocated to, 10;Protein AF-10;MKIAA4140 protein (Fragment);MLLT10 histone lysine methyltransferase DOT1L cofactor (Fragment)	25845.9	24534.9	19065.8	22474.8	20217.8	21604.1	18783.4	17563	17714.8
A2ASS6	A2ASS6	Ttn	Titin	12353280	12687669	12089584	5.68772e+06	5.65777e+06	5674950	10521536	10283427	10085602
A2ASX2;A2ASX3;Q9JLM9	A2ASX2;A2ASX3;Q9JLM9	Grb14	Growth factor receptor bound protein 14;Growth factor receptor bound protein 14 (Fragment);Growth factor receptor-bound protein 14	9164.12	7860.75	7084.63	10427.6	8704.01	10919.8	6151.29	5713.85	7928.23
A2ASY0;A2ASY1;Q5HZG4	A2ASY0;A2ASY1;Q5HZG4	Taf3	TATA-box binding protein associated factor 3;TAF3 RNA polymerase II, TATA box binding protein (TBP)-associated factor;Transcription initiation factor TFIID subunit 3	18686.5	19810.4	16822	13235.7	12407.3	12946.2	10014.2	9619.3	14705.7
A2AT37;F6Q3G7	A2AT37;F6Q3G7	Upf2	Regulator of nonsense transcripts 2;UPF2 regulator of nonsense transcripts homolog (yeast) (Fragment)	21498.8	14560.9	12402.9	12657	18962.9	17337.3	6290.35	10208.6
A2ATI9;Q3TG07;Q3TIK1;Q3TX06;Q99JX3	A2ATI9;Q3TG07;Q3TIK1;Q3TX06;Q99JX3	Gorasp2	Golgi reassembly stacking protein 2;PDZ GRASP-type domain-containing protein;PDZ GRASP-type domain-containing protein;PDZ GRASP-type domain-containing protein;Golgi reassembly-stacking protein 2	108692	57270.1	882700	171654	1.26023e+06	199413	632276	721915	1073981
A2ATK9;A2ATL0;A2ATL1	A2ATK9;A2ATL0;A2ATL1	Fam171a1	Family with sequence similarity 171, member A1;Family with sequence similarity 171, member A1;Family with sequence similarity 171, member A1	6366.33	7661.2	8999.47	7305.27	8246.79	3271.16	2430.28	4536.67	1486.46
A2ATQ5;B7ZNX2;P53995	A2ATQ5;B7ZNX2;P53995	Anapc1	Anaphase promoting complex subunit 1;Anaphase promoting complex subunit 1;Anaphase-promoting complex subunit 1	8846.83	19581.2	21315.6	7905.25	6005.24	8102.36	9861.61	5517.69	4994.48
A2ATR8;P97290	A2ATR8;P97290	Serping1	Serine (or cysteine) peptidase inhibitor, clade G, member 1;Plasma protease C1 inhibitor	33931.4	18774.2	26657	17642	18749.2	19603.2	8151.85	21274.9	7775.06
A2ATS4;G3X8X3;Q8BSM7	A2ATS4;G3X8X3;Q8BSM7	Slc43a1	Solute carrier family 43, member 1;Solute carrier family 43, member 1;Large neutral amino acids transporter small subunit 3	24522.8	27905.1	31425.8	10908.4	11727.7	14033.6	24228.8		2143.27
A2ATZ8;J3QK20;Q3TYI5;Q8R0S4	A2ATZ8;J3QK20;Q3TYI5;Q8R0S4	Cacnb4	Calcium channel, voltage-dependent, beta 4 subunit;Calcium channel, voltage-dependent, beta 4 subunit;SH3 domain-containing protein (Fragment);Voltage-dependent L-type calcium channel subunit beta-4			4522.19		6834.43
A2AU62;Q3U3F6;Q64012	A2AU62;Q3U3F6;Q64012	Raly	HnRNP-associated with lethal yellow (Fragment);RRM domain-containing protein;RNA-binding protein Raly	26211.3	24874.7	28150.9	79220.4	76063.2	77692.1	71963.5	79812.5	90383.4
A2AUC9	A2AUC9	Klhl41	Kelch-like protein 41	11798.6	14044.2	13016.2	2863.85	2634.78	2852.42	4149.85	3110.24	3059.51
A2AUD5;Q3TAI4;Q3TUJ9;Q8BKP1;Q9CYZ2	A2AUD5;Q3TAI4;Q3TUJ9;Q8BKP1;Q9CYZ2	Tpd52l2	Tumor protein D52-like 2;Tumor protein D52-like 2;Tumor protein D52-like 2;Tumor protein D52-like 2;Tumor protein D54	46337.4	45471	41473.2	13429.1	13154	11402.5	13766.1	18424.2	16703.5
A2AUE1;G5E8T0;P60904;Q921J3	A2AUE1;G5E8T0;P60904;Q921J3	Dnajc5	DnaJ heat shock protein family (Hsp40) member C5 (Fragment);DnaJ heat shock protein family (Hsp40) member C5;DnaJ homolog subfamily C member 5;Dnajc5 protein	6239.61			1306.16	1414.71	2116.63		10244.9	8789.15
A2AUK5;A2AUK8;B6ZHC9	A2AUK5;A2AUK8;B6ZHC9	Epb41l1	Erythrocyte membrane protein band 4.1 like 1;Erythrocyte membrane protein band 4.1 like 1;Erythrocyte protein band 4.1-like 1	10209	11404.8	10387.4	20726.3	20297.1	17301.1	9651.54	9871.33	9196.71
A2AUM6;P16254	A2AUM6;P16254	Srp14	Signal recognition particle 14 kDa protein	32303.9	31194.5	31356	10884.6	17436.4	9742.27	32202.8	26744.6	21768.2
A2AUR7;Q01730;Q3TFN7;Q9CSE4;Q9CUS2;Q9D031	A2AUR7;Q01730;Q3TFN7;Q9CSE4;Q9CUS2;Q9D031	Rsu1	Ras suppressor protein 1;Ras suppressor protein 1;Ras suppressor protein 1;Ras suppressor protein 1 (Fragment);Ras suppressor protein 1 (Fragment);Ras suppressor protein 1	1060.28	1116.67	357.87	107.633	256.579	83.4428	294.067	434.046	169.815
A2AUX3;A2AUX5;B7ZD29;F6RK07;Q3U2G7;Q3UHC7	A2AUX3;A2AUX5;B7ZD29;F6RK07;Q3U2G7;Q3UHC7	Dab2ip	Disabled 2 interacting protein;Disabled 2 interacting protein;Disabled 2 interacting protein;Disabled 2 interacting protein (Fragment);Disabled homolog 2-interacting protein (Fragment);Disabled homolog 2-interacting protein	40673.8	41174.1	39992.4	29619.2	29164.9	30051.6	29704.1	29043	24698.8
A2AUY4	A2AUY4	Baz2b	Bromodomain adjacent to zinc finger domain protein 2B	4364.3	1563.78	3880.54	1053.61	5187.58	5371.04	3070.57		3090.57
A2AV19;Q3TKQ3;Q8VBV3	A2AV19;Q3TKQ3;Q8VBV3	Exosc2	Ribosomal RNA-processing protein 4 (Fragment);Ribosomal RNA-processing protein 4;Exosome complex component RRP4	8281.71	7734.03	7828.5	5112.85	6409.6	7035.33	8619.15	9051.02	7722.18
A2AVJ7;Q99PL5	A2AVJ7;Q99PL5	Rrbp1	Ribosome binding protein 1;Ribosome-binding protein 1	7210.6	11003.3	10486.7	4256.95	3547.34	3945.66	4072.8	4637.59	3741.12
A2AVR9;P62627	A2AVR9;P62627	Dynlrb1	Dynein light chain roadblock;Dynein light chain roadblock-type 1		4.1294	1
A2AVY9;H3BJF0;Q3TZS1;Q8C0Y1	A2AVY9;H3BJF0;Q3TZS1;Q8C0Y1	Tgif2	TGFB-induced factor homeobox 2;TGFB-induced factor homeobox 2;TGFB-induced factor homeobox 2;Homeobox protein TGIF2					822.286		87222.7
A2AW13;A2AW15;Q3UVR3	A2AW13;A2AW15;Q3UVR3	Ttbk2	Tau tubulin kinase 2 (Fragment);Tau tubulin kinase 2;Tau-tubulin kinase 2			1639.77	2230.05	1764.52	2331.02	1023.88		1081.8
A2AW86;Q60767	A2AW86;Q60767	Ly75	Lymphocyte antigen 75				418.489	988.674	650.207	909.16
A2AWA9;B2RRC5	A2AWA9;B2RRC5	Rabgap1	Rab GTPase-activating protein 1;RAB GTPase activating protein 1	17838.7	22717.8	28697.9	21124.6	16694.4	18618.8	9644.71	12606	19492.1
A2AWF9	A2AWF9	Ptprj	protein-tyrosine-phosphatase	3637.39	2482.12		2205.85
A2AWL7;E9QLG3;H7BX50	A2AWL7;E9QLG3;H7BX50	Mga	MAX gene-associated protein;MAX gene associated;MAX gene associated	3641.36	5805.4	3222.54	5948.28	7851.85	6426.32	7803.46	10965.2	6648.54
A2AWS5;B7ZDF5;B7ZDF7;Q3U2E0;Q3UJF1;Q6P9T4;Q80TW3;Q9Z2V6	A2AWS5;B7ZDF5;B7ZDF7;Q3U2E0;Q3UJF1;Q6P9T4;Q80TW3;Q9Z2V6	Hdac5	Histone deacetylase;Histone deacetylase;Histone deacetylase;Histone deacetylase;Histone deacetylase;Histone deacetylase;histone deacetylase (Fragment);Histone deacetylase 5	52004.8	46331.7	54220.8	27171.3	25143.9	24989.7	39189	40694.7	28784.5
A2AWT3;F6RCN9;Z4YN62	A2AWT3;F6RCN9;Z4YN62	Atxn7l3	Ataxin-7-like protein 3;Ataxin 7-like 3 (Fragment);Ataxin 7-like 3 (Fragment)	1586.26			2096.75	569.696	1021.21	1174.16	826.908	508.59
A2AWT5;A2AWT6;A2AWT7;P25976;Q9DBH1	A2AWT5;A2AWT6;A2AWT7;P25976;Q9DBH1	Ubtf	Upstream binding transcription factor, RNA polymerase I;Upstream binding transcription factor, RNA polymerase I;Upstream binding transcription factor, RNA polymerase I;Nucleolar transcription factor 1;HMG box domain-containing protein	7213.01	5442.89	7052.66	15866.7	14958.5	13686.7	11220.1	12408	10781
A2BDX2;O70152	A2BDX2;O70152	Dpm1	Dolichol-phosphate mannosyltransferase subunit 1	11240.2	4402.47	10355.5	1506.14	2082.98	3624.62	1600.84	10413.5	5764.35
A2BE28	A2BE28	Las1l	Ribosomal biogenesis protein LAS1L	952.951	2297.62		772.381	557.929		1586.84
A2BE45;Q9R0M3	A2BE45;Q9R0M3	Srpx	Sushi-repeat-containing protein;Sushi-repeat-containing protein SRPX	2428.06	4397.38	3951.89	2169.53	1854.73	1895.86	3490.51	2455.95	2340.72
A2BE93;Q3T9S3;Q5U445;Q9EQU5	A2BE93;Q3T9S3;Q5U445;Q9EQU5	Set;Set;BC085271;Set	SET nuclear oncogene (Fragment);SET translocation;cDNA sequence BC085271;Protein SET	132503	152332	152270	180096	185199	221423	171579	154603	152633
A2BEG5;Q3UMI0;Q8VCD7	A2BEG5;Q3UMI0;Q8VCD7	Kdm4c	[histone H3]-trimethyl-L-lysine(9) demethylase;Lysine-specific demethylase 4C (Fragment);Lysine-specific demethylase 4C	6140.83	7672.02	7295.63	17757.9	13442	10988.4	9374.14	7135.06	7326.36
A2BFA9;A2BFB0;O08609;Q8K0H8	A2BFA9;A2BFB0;O08609;Q8K0H8	Mlx	MAX-like protein X (Fragment);MAX-like protein X;Max-like protein X;MAX-like protein X	9614.44	9148.8	10025.3	9519.83	10452.7	10211	6138.04	6982.89	6990.89
A2BFF7;A2BFF8;O88487;Q3TPJ8	A2BFF7;A2BFF8;O88487;Q3TPJ8	Dync1i2	Dynein cytoplasmic 1 intermediate chain 2;Dynein cytoplasmic 1 intermediate chain 2;Cytoplasmic dynein 1 intermediate chain 2;Dynein cytoplasmic 1 intermediate chain 2	53789.5	54415.6	53587.3	36299.7	35133.3	33198.7	32580.2	33238.6	38798.2
A2BG75;A2BG76;A2BG77;I7HIP8;P97863;Q6GSP7;Q8BN68;Q8C434	A2BG75;A2BG76;A2BG77;I7HIP8;P97863;Q6GSP7;Q8BN68;Q8C434	Nfib;Nfib;Nfib;Nfib;Nfib;Nfib;;Nfib	Nuclear factor 1;Nuclear factor 1;Nuclear factor 1;Nuclear factor 1;Nuclear factor 1 B-type;Nuclear factor 1;Nuclear factor 1;Nuclear factor 1	36118.7	38047.9	36178.8	44101.4	42102.6	45809.6	52504.4	56147.7	55539.4
A2BH40;E9QAQ7	A2BH40;E9QAQ7	Arid1a	AT-rich interactive domain-containing protein 1A;AT rich interactive domain 1A (SWI-like)	37065.9	38708.4	48121.4	109234	114180	92218.8	94916	102154	88309.3
A2BI37	A2BI37	Zfp185	Zinc finger protein 185	35092.4	28983.7	38557.7	65486.6	57474	59666.1	37899.6	40395.9	43022.6
A2CEE5;A2CEE6;A2CEE7;B1B0X3;E9PUP0;Q7TPS0	A2CEE5;A2CEE6;A2CEE7;B1B0X3;E9PUP0;Q7TPS0	Rps6ka6	Ribosomal protein S6 kinase;Ribosomal protein S6 kinase;Ribosomal protein S6 kinase;Ribosomal protein S6 kinase;Ribosomal protein S6 kinase;Ribosomal protein S6 kinase alpha-6	2958.6				856.984			3777.53
A2CF65;F8WHB7;J3QPR7;P49300;Q3TCD3	A2CF65;F8WHB7;J3QPR7;P49300;Q3TCD3	Clec10a	C-type lectin domain family 10, member A (Fragment);C-type lectin domain family 10, member A;C-type lectin domain family 10, member A;C-type lectin domain family 10 member A;C-type lectin domain-containing protein	5721.68	5917.84	5183.37	3560.05	3494.72	3184.86	4615.4	3136.87	2472.52
A2CF80;A2CF83;D3Z687;F6S0D5;F6XN97;H3BJI0;Q9DCT6	A2CF80;A2CF83;D3Z687;F6S0D5;F6XN97;H3BJI0;Q9DCT6	0610010K14Rik;0610010K14Rik;0610010K14Rik;0610010K14Rik;0610010K14Rik;0610010K14Rik;Bap18	RIKEN cDNA 0610010K14 gene;RIKEN cDNA 0610010K14 gene;RIKEN cDNA 0610010K14 gene;RIKEN cDNA 0610010K14 gene (Fragment);RIKEN cDNA 0610010K14 gene;RIKEN cDNA 0610010K14 gene (Fragment);Chromatin complexes subunit BAP18	5293.86	4212.52	3996.11	16419.3	15564.7	15660.5	31305.8	27672.6	28641.7
A2CG35;P35283	A2CG35;P35283	Rab12	RAB12, member RAS oncogene family;Ras-related protein Rab-12	93468.4	82908.1	79346.8	42028.8	38623.8	38632.1	70286.8	85564.8	61953.8
A2CG63	A2CG63	Arid4b	AT-rich interactive domain-containing protein 4B	20486.8	23735.2	19975.7	21549.1	26035.7	18034.9	23262	17993.4	10782.1
A2CG76;Q3U4G9	A2CG76;Q3U4G9	Ehmt2	Euchromatic histone lysine N-methyltransferase 2;Histone-lysine N-methyltransferase EHMT2	12621.7	11993.4	15076.2	18771.2	12460.8	14260.9	13939.2	11730.5	8774.78
A2NTK5;A2NTK6;O54999;P97484;Q8K4V6;Q8R2Z1	A2NTK5;A2NTK6;O54999;P97484;Q8K4V6;Q8R2Z1	Pirb;Pirb;;Lilrb3;Pirb;Pirb	PIRB1;PIRB2 (Fragment);Killer cell inhibitory receptor-like protein p91A;Leukocyte immunoglobulin-like receptor subfamily B member 3;Paired immunoglobulin-like receptor B (Fragment);Leukocyte immunoglobulin-like receptor, subfamily B (With TM and ITIM domains), member 3	12196.2	11899.8	890.028	7505.5	5234.86	4236.02	6701.84	4832.71	4564.54
A2RRK3;O54988	A2RRK3;O54988	Slk	non-specific serine/threonine protein kinase;STE20-like serine/threonine-protein kinase	2874.57	3628.69	8575.53	5564.09	2949.02	6249.1	7189.34	3666.85	2435.57
A2RRK7;Q6PAJ1	A2RRK7;Q6PAJ1	Bcr	Bcr protein;Breakpoint cluster region protein	81228.5	73387.1	78175	47275.1	31561.2	34155.2	11712.5	12469.6	18430.2
A2RS22;Q9WUM3	A2RS22;Q9WUM3	Coro1b	Coronin;Coronin-1B	6904.82	5295.81	1226.45	3397.99	2017.15	2892.46	1771.67	2063.84	1887.22
A2RS23;Q11136	A2RS23;Q11136	Pepd	Peptidase D;Xaa-Pro dipeptidase	1544.51	2352.51	2844.8	1830.36	2344.05	997.206	795.218	1184.68	732.11
A2RS53;F6V6T4;Q3THL1;Q3U9H7;Q8BPI2;Q8C1Z9;Q9R0Q3	A2RS53;F6V6T4;Q3THL1;Q3U9H7;Q8BPI2;Q8C1Z9;Q9R0Q3	Tmed2	Transmembrane emp24 domain trafficking protein 2;Transmembrane p24 trafficking protein 2 (Fragment);GOLD domain-containing protein;GOLD domain-containing protein (Fragment);Transmembrane p24 trafficking protein 2 (Fragment);GOLD domain-containing protein;Transmembrane emp24 domain-containing protein 2	9820.24	26034.8	1691.24		2291.18	3732.01	5465.85	5906.52	5329.33
A2RS68;Q62376	A2RS68;Q62376	Snrnp70	U1 small nuclear ribonucleoprotein 70 kDa	5267.9	4187.74	3729.58	4234.76	4786.85	2276.77	4275.06	4398.75	5517.21
A2RS96;Q8VCE7;Q9CXE7	A2RS96;Q8VCE7;Q9CXE7	Tmed5	Transmembrane emp24 protein transport domain containing 5;Transmembrane emp24 protein transport domain containing 5;Transmembrane emp24 domain-containing protein 5	524.116							6404.15
A2RSB1;B7ZNL2;Q78ZA7;Q8C1W9	A2RSB1;B7ZNL2;Q78ZA7;Q8C1W9	Nap1l4	Nucleosome assembly protein 1-like 4;Nap1l4 protein;Nucleosome assembly protein 1-like 4;Nucleosome assembly protein 1-like 4	6339.95	12266.4	10687.8	26236	21337.4	18631.6	18327.2	19911	25222.5
A2RSJ4	A2RSJ4	Bltp3b	Bridge-like lipid transfer protein family member 3B	2144.83	1231.74			11517	4838.66	4225.96	3124.68	2830.3
A2RSV8;P19783	A2RSV8;P19783	Cox4i1	Cytochrome c oxidase subunit 4;Cytochrome c oxidase subunit 4 isoform 1, mitochondrial	7802.23	37550.4	6277.81	2222.93	3492.98	3888.08	4237.93	2940.59	7810.67
A2RSY1	A2RSY1	Kansl3	KAT8 regulatory NSL complex subunit 3		2809.9	753.782	3109.97	2555.97	3588.39	619.372	1513.21	1273.29
A2RT57;Q9CQC8	A2RT57;Q9CQC8	Spg21	Maspardin	24267.3	18032.1	22228.1	15669.7	17515.7	18126	30585.8	25538	27474.6
A2RT81	A2RT81	Rnf39	Ring finger protein 39	8995.16	9075.23	10849.4	2974.77	2565.03	3881.45	2126.66	2761.95	1364.65
A2RTA0;P07310;Q9D6U7	A2RTA0;P07310;Q9D6U7	Ckm	creatine kinase;Creatine kinase M-type;creatine kinase	589320	562374	581579	110190	119359	118519	229736	210637	208567
A2RTT4;P61089	A2RTT4;P61089	Ube2n	Ubiquitin-conjugating enzyme E2N;Ubiquitin-conjugating enzyme E2 N	1309.88	2502.45	1635.34	458.076	1978.09	1036.18		626.11	390.425
A2RTV1;Q3U1B7	A2RTV1;Q3U1B7	Serpina3h	Serpina3h protein;Serpin domain-containing protein	375.654	118.178	79.9431	1530.43				1270.93	826.075
A2T0Z1;Q3U4V9;Q60677	A2T0Z1;Q3U4V9;Q60677	Itgae	Integrin alpha E;VWFA domain-containing protein;Integrin alpha-E	8277.66	11754.2	9448.47	13691.5	7794.21	10074.3	11055.1	8286.2	8452.34
A2TH11;G3X8Q0;O89090	A2TH11;G3X8Q0;O89090	Sp1	Transcription factor 1 (Fragment);Trans-acting transcription factor 1;Transcription factor Sp1	31686.9	34316.1	34578.8	39721.6	40365.1	44161.9	29287.9	30016.7	29973.1
A2TJV2	A2TJV2	Palm3	Paralemmin-3	866.496	1114.24	255.632	1648.27	1873.94	1717.16	993.255	1674.75	775.047
A2VCN7;Q91V98	A2VCN7;Q91V98	Cd248	Cd248 protein (Fragment);Endosialin	6553.25	7467.78	6736.27	15438.8	13092	14504.1	7608.55	4707.08	8219.48
A3KFM7;A3KFM8;Q3TSG0;Q8BIE8	A3KFM7;A3KFM8;Q3TSG0;Q8BIE8	Chd6	Chromodomain-helicase-DNA-binding protein 6;DNA helicase (Fragment);Uncharacterized protein (Fragment);DNA helicase					489.124
A3KFU5;A3KFU8;Q3UX16;Q6PHQ9;Q91YZ8;Q99LF8	A3KFU5;A3KFU8;Q3UX16;Q6PHQ9;Q91YZ8;Q99LF8	Pabpc4	Polyadenylate-binding protein	12098.1	11145.1	13130.6	4186.57	4607	4356.57	4977.97	3945.94	2459.65
A3KG36;Q00612;Q3TNL1;Q790Y8	A3KG36;Q00612;Q3TNL1;Q790Y8	G6pdx	Glucose-6-phosphate 1-dehydrogenase (Fragment);Glucose-6-phosphate 1-dehydrogenase X;Glucose-6-phosphate 1-dehydrogenase;Glucose-6-phosphate 1-dehydrogenase	5.14865e+06	3748057	4258093	3453012	2.55622e+06	2.79076e+06	3.28582e+06	4.01985e+06	2.70428e+06
A3KGI3;Q66JQ7	A3KGI3;Q66JQ7	Knl1	Kinetochore scaffold 1					10332.2	8310.01		28415
A3KGJ7;B2RWX5;E9Q5A8;Q60952	A3KGJ7;B2RWX5;E9Q5A8;Q60952	Cep250	Centrosomal protein 250;Centrosomal protein 250;Centrosomal protein 250;Centrosome-associated protein CEP250	4160.08	3926.14	3960.72	977.685	1196.99	1673.78	1462.96	1052.52	1219.37
A3KGK7;B7ZCP4;B7ZCP5;B7ZCP6;B7ZCP7;B7ZCP8;E9Q806;Q3U893;Q3UJS6;Q8BT60;Q8C166;V9GWY2;V9GX86	A3KGK7;B7ZCP4;B7ZCP5;B7ZCP6;B7ZCP7;B7ZCP8;E9Q806;Q3U893;Q3UJS6;Q8BT60;Q8C166;V9GWY2;V9GX86	Cpne1;Cpne1;Cpne1;Cpne1;Cpne1;Cpne1;Cpne1;Cpne1;Cpne3;Cpne3;Cpne1;Cpne1;Cpne1	Copine I (Fragment);Copine I;Copine I (Fragment);Copine I (Fragment);Copine I (Fragment);Copine I (Fragment);Copine I;C2 domain-containing protein;C2 domain-containing protein;Copine-3;Copine-1;Copine I;Copine I (Fragment)	23324	21288.5	22689.3	7766.51	5204.46	6574.33	10082.8	8980.28	11353.5
A3KGR6;B2RWZ4;O35929	A3KGR6;B2RWZ4;O35929	Rem1	Rad and gem related GTP binding protein 1 (Fragment);GTP-binding protein;GTP-binding protein REM 1	10314.3	10209.5	21534.4	7759.96	12884.9	13054.3	12591	7629.39	15488.3
A3KGR9;Q861Q5;Q9D8V0	A3KGR9;Q861Q5;Q9D8V0	H13;H13;Hm13	Histocompatibility 13 (Fragment);H13 protein (Fragment);Minor histocompatibility antigen H13			738.319	295.065					792.836
A3KGU7;A3KGU9;B2RXX6;B9EKJ1;P16546	A3KGU7;A3KGU9;B2RXX6;B9EKJ1;P16546	Sptan1	Spectrin alpha, non-erythrocytic 1;Spectrin alpha, non-erythrocytic 1;Spna2 protein;Spna2 protein;Spectrin alpha chain, non-erythrocytic 1	271165	214514	226110	117879	109054	112816	141057	110831	113622
A3KMJ7;Q497Z1;Q7TMQ8;Q8C0E3	A3KMJ7;Q497Z1;Q7TMQ8;Q8C0E3	Trim47	Tripartite motif-containing 47;Trim47 protein (Fragment);Trim47 protein (Fragment);E3 ubiquitin-protein ligase TRIM47	254701	220679	211572	111364	111308	117455	176232	165680	155976
A3KML3;P68254	A3KML3;P68254	Ywhaq	14-3-3 protein theta	11900.2	8606.06	9340.45	2946.78	3017.19	3800.72	1755.32	3347.5	1779.1
A3KMN0;Q3UQ17	A3KMN0;Q3UQ17	Zbtb16	Zbtb16 protein (Fragment);Zinc finger and BTB domain containing 16	9027.18	7550.53	7567.94	6305.77	4519.7	9047.68	6844.74	6900.82	5961.92
A4FU62;G0YP42	A4FU62;G0YP42	Iglv2;	LOC207685 protein (Fragment);Anti-human Langerin 2G3 lambda chain	4681.05	880.22	6076.61		1877	233.894	336.593	1179.14	378.754
A4FUS1;P14131;Q5CZY9;Q641N3	A4FUS1;P14131;Q5CZY9;Q641N3	Rps16	Rps16 protein;Small ribosomal subunit protein uS9;Rps16 protein;Rps16 protein (Fragment)	30437.9	25072.6	33697.3	11353.4	9653.42	9435.21	22609.6	18162.3	24002.4
A4FUU9;B9EJ24;Q9DBC0	A4FUU9;B9EJ24;Q9DBC0	Selenoo	Selenoprotein O (Fragment);Selenoprotein O;Protein adenylyltransferase SelO, mitochondrial	537.414	1119.18	930.22	1204.4	2345.37	334.408
A4GE64;A4GE65;Q14DP5;Q65CL1	A4GE64;A4GE65;Q14DP5;Q65CL1	Ctnna3	Alpha-T-catenin;Alpha-T-catenin isoform X;Catenin (Cadherin associated protein), alpha 3;Catenin alpha-3		14100.2	12022.4	16885.1	15439.9	16634.4	8257.87	8921.06	9493.41
A4GZ26;E9QAD8	A4GZ26;E9QAD8	Iqsec2	ARF6 guanine nucleotide exchange factor IQArfGEF;IQ motif and Sec7 domain 2	1659.99	1028.09	28.4527	825.03	1581.95	2569.84	2600.43		2229.85
A4QPC5;P21844	A4QPC5;P21844	Cma1	Chymase 1, mast cell;Chymase	5.35401e+06	57680.7	5037016	7.5123e+06	10013130	10189623	9407467	9141640	9600694
A4QPD1;Q64318	A4QPD1;Q64318	Zeb1	Zinc finger E-box binding homeobox 1;Zinc finger E-box-binding homeobox 1	7005.59	19083.1	13441.7	3550.58	456.151	3379.84	4729.69	4913.56	4155.49
A4QPF5;Q8C351	A4QPF5;Q8C351	Layn	Layilin				2639.65	1426.23	1004.83	8997.48	4196.2
A5A8K4;D3Z118;D3Z376;P97411;S4R217	A5A8K4;D3Z118;D3Z376;P97411;S4R217	Ica1	Islet cell autoantigen 1;Islet cell autoantigen 1;Islet cell autoantigen 1 (Fragment);Islet cell autoantigen 1;Islet cell autoantigen 1
A5CVE4;B2RQE3;B7ZN44;I1E4X8;P83093	A5CVE4;B2RQE3;B7ZN44;I1E4X8;P83093	Stim2	Stromal interaction molecule 2;Stim2 protein;Stim2 protein;Stromal interaction molecule 2;Stromal interaction molecule 2	2201.27	2366.87	1682.97	4299.47	4257.37	2086.92	2589.11	1000.47	1979.35
A5D6P2	A5D6P2	Pard3	Par-3 (Partitioning defective 3) homolog (C. elegans)	15834.1	16983.8	13712.6	22478.3	20594.2	19486	17720.7	14355.9	12780.2
A5D6P3;E9Q1I5;O35379;Q3UDM1	A5D6P3;E9Q1I5;O35379;Q3UDM1	Abcc1	ABC-type glutathione-S-conjugate transporter;ATP-binding cassette, sub-family C (CFTR/MRP), member 1;Multidrug resistance-associated protein 1;ABC transmembrane type-1 domain-containing protein (Fragment)	44775	8031.11	1414.72	4687.19	5192.29	39837	16405.6		6471.32
A5D6P6;Q9D030	A5D6P6;Q9D030	Twist2	Twist basic helix-loop-helix transcription factor 2;Twist-related protein 2	9163.36	12699.3	39725.2	19310.2	15793.5	33747.2	15300	18554.7	40223.5
A5HE91;Q8CCH7	A5HE91;Q8CCH7	Zfpm2	FOG-2S transcriptional co-factor;Zinc finger protein ZFPM2	8965.24		14568.4				4929.73	6155.97
A5HLW0;A5HLW1;B2RX07;F6UFZ5;G3X9Z4;Q69ZY3;Q6PCW0	A5HLW0;A5HLW1;B2RX07;F6UFZ5;G3X9Z4;Q69ZY3;Q6PCW0	Pcf11	PCF11 (Fragment);PCF11 (Fragment);Cleavage and polyadenylation factor subunit homolog (S. cerevisiae);PCF11 cleavage and polyadenylation factor subunit (Fragment);PCF11 cleavage and polyadenylation factor subunit;MKIAA0824 protein (Fragment);Pcf11 protein (Fragment)	78274.6	77602.1	96129.5	78525.1	89388.8	87772.4	94889.7	87246.4	79249.7
A6BLY7	A6BLY7	Krt28	Keratin, type I cytoskeletal 28	4008.72	6365.25	7450.77	681389	728900	771704	367648	367789	340830
A6H5X4	A6H5X4	Phf11	PHD finger protein 11	34444.7	30982	29956.1	18462.6	19669.7	26616.7	19076.8	12733.1	17138.5
A6H5Y3;Q8BUC4	A6H5Y3;Q8BUC4	Mtr	Methionine synthase;AdoMet activation domain-containing protein (Fragment)		1
A6H5Z1;G3X919;Q8C003;Q9EPZ6	A6H5Z1;G3X919;Q8C003;Q9EPZ6	Tbx18	T-box18;T-box18;T-box domain-containing protein;T-box transcription factor TBX18	702.503	1160.32	2745.66		2049.08	2620.48	290.123	319.366
A6H619	A6H619	Phrf1	PHD and RING finger domain-containing protein 1	30927.9	41301.6	41758.4	30076.3	31609.9	28312.5	29431.8	28114.8	25399.7
A6H630;D6RG65	A6H630;D6RG65	Armt1	Damage-control phosphatase ARMT1;Acidic residue methyltransferase 1	13819.2	8663.65		4407.1	5715.29	4160.48	26267.7
A6H644;Q8BG95	A6H644;Q8BG95	Ppp1r12b	Protein phosphatase 1 regulatory subunit;Protein phosphatase 1 regulatory subunit 12B	859.746	468.57	540.841		1318.04		3508.17	1854.02	1572.36
A6H648;B7ZNG5;E9Q9D8;Q8BYG3	A6H648;B7ZNG5;E9Q9D8;Q8BYG3	Ankrd35	Ankrd35 protein;Ankrd35 protein;Ankyrin repeat domain 35;Uncharacterized protein (Fragment)		1708.01	2257.46				1111.38
A6H653;Q8BGU0	A6H653;Q8BGU0	Cyp4f39	Cytochrome P450, family 4, subfamily f, polypeptide 39;Cytochrome P450, family 4, subfamily f, polypeptide 39	4400.29	6416.86	7394.84	2919.55	5468.62	5816.06	5042.5	1137.41	2170.44
A6H659;Q3U1F9	A6H659;Q3U1F9	Pag1	Pag1 protein;Phosphoprotein associated with glycosphingolipid-enriched microdomains 1	8316.08	5703.37	10536.8	4500.02	3418.8	5365.04	7420.91	4226.18	3185.4
A6H663;Q9JLV1	A6H663;Q9JLV1	Bag3	BCL2-associated athanogene 3;BAG family molecular chaperone regulator 3	27759.6	47982.1	38840.8	37511.5	33570.4	36744.3	35227.9	39186.4	35946.1
A6H667;F8WGT6;Q02111;Q8CAV6;Q920N8	A6H667;F8WGT6;Q02111;Q8CAV6;Q920N8	Prkcq	Protein kinase C theta type;protein kinase C (Fragment);Protein kinase C theta type;Protein kinase C;Protein kinase C thetaII		4985.87	4637.94		3203.24		10755.6	9752.86	9091.14
A6H6H9;Q5QGZ6;Q61818	A6H6H9;Q5QGZ6;Q61818	Rai1	Rai1 protein;Retinoic acid induced 1;Retinoic acid-induced protein 1	10677.2	8676.79	8870.55	9599.24	7822.08	10847.3	8179	12280.2	8915.39
A6H6J9;F7BE84;Q3UI28;Q5DTZ5	A6H6J9;F7BE84;Q3UI28;Q5DTZ5	Ankrd50	Ankyrin repeat domain 50;Ankyrin repeat domain 50 (Fragment);Uncharacterized protein (Fragment);MKIAA1223 protein (Fragment)	3812.74	5259.01	7848.39	9579.69	9955.46	8061.4	6189.14	6796.67	6242.01
A6H6K1;Q99MQ4	A6H6K1;Q99MQ4	Aspn	Aspn protein;Asporin	30465.8	23258.5	22898.2	17609.3	15956.4	19314.8	27160.1	27889.5	25579.9
A6H6M2;Q8C110	A6H6M2;Q8C110	Slitrk6	SLIT and NTRK-like family, member 6;SLIT and NTRK-like protein 6
A6H6S8;Q8CI61	A6H6S8;Q8CI61	Bag4	BCL2-associated athanogene 4;BAG family molecular chaperone regulator 4		1219.27			3292.71	4790.9	1845.06	3636.36
A6H8H2	A6H8H2	Dennd4c	DENN domain-containing protein 4C	9460.33	9570.13	8662.91	11323.4	11201.2	10734.5	10696.7	11202.1	10247.1
A6MDD3;Q8R422	A6MDD3;Q8R422	Cd109	CD109 antigen	41356.4	57355	45220.3	22265.1	21552.6	25896.7	18395.1	19922.6	24326.2
A6P3E3;E9PV80;Q61026;Q7TPU7;Q8BN74	A6P3E3;E9PV80;Q61026;Q7TPU7;Q8BN74	Ncoa2	Nuclear receptor coactivator;Nuclear receptor coactivator;Nuclear receptor coactivator 2;Nuclear receptor coactivator;Nuclear receptor coactivator 2	7230.42	8943.69	7402.54	13143.5	12873	13508.9	8308.26	9528.68	7174.98
A6PW47;Q99K74	A6PW47;Q99K74	Med24	Mediator of RNA polymerase II transcription subunit 24	1352.4	2977.8	1674.59	4019.98	5829.86	5188.56	5883.13	3720.07	4066.69
A6PWR8;Q8BUM9	A6PWR8;Q8BUM9	Usp43	ubiquitinyl hydrolase 1;Ubiquitin carboxyl-terminal hydrolase 43	6940.99	8451.75	11480.4	39476.3	38767.4	38518.3	38857.2
A6X8Z3;Q5SF07	A6X8Z3;Q5SF07	Igf2bp2	Insulin-like growth factor 2 mRNA binding protein 2;Insulin-like growth factor 2 mRNA-binding protein 2	15215.7	17176.6	14331.1	5542.07	5132.85	5840.82	3569.84	5056.92	5619.48
A6X8Z5;B2RSI0	A6X8Z5;B2RSI0	Arhgap31	Rho GTPase-activating protein 31;CDC42 GTPase-activating protein	13991.4	13200.4	11492.2	9863.24	9062.47	8549.25	6503.1	8645.55	6189.6
A6X919	A6X919	Dpy19l1	Probable C-mannosyltransferase DPY19L1	119892	120901	85979.4	85507.3	80068.1	83460.8	81779.9	75569.6	97420
A7E215;B1AXN9;P18654	A7E215;B1AXN9;P18654	Rps6ka3	non-specific serine/threonine protein kinase (Fragment);non-specific serine/threonine protein kinase;Ribosomal protein S6 kinase alpha-3	60201.5	54338.1	61116.9	39505.6	24233	32061	26199.4	13792.2	24501.8
A7ISP9;F8WJ93;Q3UMY5	A7ISP9;F8WJ93;Q3UMY5	Eml4	EMAP-like protein 4;Echinoderm microtubule associated protein like 4;Echinoderm microtubule-associated protein-like 4	10925.2	7210.91	9385.86	8151.25	4573.23	6593.17	5322.08	7470.35	6259.34
A7MCU8;G3X9D9;P48997;Q9EQ57	A7MCU8;G3X9D9;P48997;Q9EQ57	Ivl;Ivl;Ivl;	Involucrin;Involucrin;Involucrin;Involucrin (Fragment)	11014	7564.27	6651.92	12741.3	20995.5	15552.3	8476.55	11069.6	7223.64
A7UKX1;O88551;Q4FJV3	A7UKX1;O88551;Q4FJV3	Cldn1	Claudin;Claudin-1;Claudin	8966.33	11598.5	10017.2	13512.3	13752.9	11600.6	19374.8	17548.6	19248.4
A7VJD3;O88855	A7VJD3;O88855	Ltb4r1;Ltb4r	LTB4 receptor;Leukotriene B4 receptor 1	8498.16	10651.8	8767.33	50474.6		33698.6	36262.4	30449.4
A7VL18;Q3THE7;Q3TMT4;Q3UDG0;Q9JLJ2	A7VL18;Q3THE7;Q3TMT4;Q3UDG0;Q9JLJ2	Aldh9a1	Gamma-aminobutyraldehyde dehydrogenase;Aldehyde dehydrogenase domain-containing protein;Aldehyde dehydrogenase domain-containing protein;Aldehyde dehydrogenase domain-containing protein;4-trimethylaminobutyraldehyde dehydrogenase	8162.05	3037.63	10178.8	4243.96	3021.26	3625.36	846.824	2480.57	1931.66
A7VMV2;Q99KP3;Q9D221	A7VMV2;Q99KP3;Q9D221	Cryl1	L-gulonate 3-dehydrogenase;Lambda-crystallin homolog;3-hydroxyacyl-CoA dehydrogenase NAD binding domain-containing protein	6144.54	10188	10661.2	8000.83	8702.26	9949.02
A7YL62;P09813	A7YL62;P09813	Apoa2	Apolipoprotein A-II	265.811	820.641	1236.31	183.882				192.018
A7YQ68;Q80Y24	A7YQ68;Q80Y24	Prickle2	Prickle planar cell polarity protein 2;Prickle-like protein 2			859.151			1432.05			2420.45
A8C1V1;F6T4L3;F6USD5;Q80ZP8;Q9CXI5	A8C1V1;F6T4L3;F6USD5;Q80ZP8;Q9CXI5	Manf	Mesencephalic astrocyte-derived neurotrophic factor (Fragment);Mesencephalic astrocyte-derived neurotrophic factor (Fragment);Mesencephalic astrocyte-derived neurotrophic factor (Fragment);Armet protein;Mesencephalic astrocyte-derived neurotrophic factor	12114.3	3948.13	4505.88
A8DUK4;A8DUK7;A8DUN2;A8DUQ1	A8DUK4;A8DUK7;A8DUN2;A8DUQ1	Hbb-bs;Hbbt1;Hbbt1;Hbbt1	Beta-globin	36315	34590.9	36200.3	21015.8	18950.7	19589.3	24671.9	25946.6	26443.6
A8DV41;D0U285;P02089;Q549D9;Q54AH9	A8DV41;D0U285;P02089;Q549D9;Q54AH9	Hbbt2;Hbbt2;Hbb-b2;Hbb-b2;Hbb-b2	Beta-globin;Beta-globin;Hemoglobin subunit beta-2;Beta-globin;Beta-2-globin (Fragment)				14855.3	10226.4	9406.18	2634.01	1352.03	3420.75
A8IP69;P61982	A8IP69;P61982	Ywhag	14-3-3 protein gamma subtype;14-3-3 protein gamma	35463.2	41081.4	43633.2	22463.9	20898.5	23913	19991.6	20662.4	20326.8
A8IP90;F6WYN6;Q5F2C5;Q5F2D0;Q5ICG4;Q5ICG5;Q5ICG6;Q80TQ7;Q8R1X1;Q91WC3	A8IP90;F6WYN6;Q5F2C5;Q5F2D0;Q5ICG4;Q5ICG5;Q5ICG6;Q80TQ7;Q8R1X1;Q91WC3	Acsl6	Long-chain-fatty-acid--CoA ligase;Acyl-CoA synthetase long-chain family member 6 (Fragment);Long-chain-fatty-acid--CoA ligase;Long-chain-fatty-acid--CoA ligase;Long-chain-fatty-acid--CoA ligase;Long-chain-fatty-acid--CoA ligase;Long-chain-fatty-acid--CoA ligase;MKIAA0837 protein (Fragment);Long-chain-fatty-acid--CoA ligase;Long-chain-fatty-acid--CoA ligase 6			1362.19	769.368	866.146	204.085	1107.84		727.554
A9CLV6;Q8C5F9;Q9QZI8	A9CLV6;Q8C5F9;Q9QZI8	Serinc1	Axotomy induced glycoprotein 2;Serine incorporator 1 (Fragment);Serine incorporator 1	25937.8	48955.4	48703.8	11073.6	11362.8	11799.7	11104.4	12403.2	12493.8
A9JR55;E9Q9T8;O70468;Q3TF37;Q3UIK0	A9JR55;E9Q9T8;O70468;Q3TF37;Q3UIK0	Mybpc3	Mybpc3 protein;Myosin binding protein C, cardiac;Myosin-binding protein C, cardiac-type;Myosin binding protein C, cardiac;Myosin binding protein C, cardiac	3714.8	3977.55	5783.39
A9XX86;F6QSC4;Q8BUD5;Q8JZN1	A9XX86;F6QSC4;Q8BUD5;Q8JZN1	Mgl2;Mgl2;;Mgl2	Macrophage galactose N-acetyl-galactosamine specific lectin 2;Macrophage galactose N-acetyl-galactosamine specific lectin 2 (Fragment);C-type lectin domain-containing protein;Macrophage galactose N-acetyl-galactosamine specific lectin 2	9558.23	16663.9	6041.63	10028.7	27063.4	5860.9	8923.84	4381.52	3215.75
B0QZF8;B1AQJ2	B0QZF8;B1AQJ2	Usp36	ubiquitinyl hydrolase 1 (Fragment);Ubiquitin carboxyl-terminal hydrolase 36	1988.15	7895.63	1766.96	2620.55	3081.38	3070.69	2787.81	3194.65	4155.02
B0QZH9;Q8BSN5	B0QZH9;Q8BSN5	Phf23	PHD finger protein 23 (Fragment);PHD finger protein 23	43478.2	120233	79398.7	62107.8	45274.2	50948.3	34662.5	48440.5	38248.9
B0QZJ2;Q5F293	B0QZJ2;Q5F293	Zbtb4	Zinc finger and BTB domain containing 4 (Fragment);Zinc finger and BTB domain-containing protein 4	21809.3	19569.7	17147.9	11218	7628.92	7183.39	12332.4	7292.07	13495.6
B0QZU5;Q9D3U0	B0QZU5;Q9D3U0	Pus10	tRNA pseudouridine(55) synthase (Fragment);tRNA pseudouridine synthase Pus10		3660.48	2938.04		1652.06	3755.61		1360.31
B0QZW4;Q8BU36;Q8BVY4;Q8BWQ2	B0QZW4;Q8BU36;Q8BVY4;Q8BWQ2	Supt3	SPT3, SAGA and STAGA complex component (Fragment);Transcription initiation protein SPT3 homolog;SPT3, SAGA and STAGA complex component;Transcription initiation protein SPT3 homolog	5528.76	5751.81	5686.57	3903.71	3077.31	5218.26	1177.04	1207.08	2468.35
B0R091;P61022	B0R091;P61022	Chp1	Calcineurin-like EF hand protein 1;Calcineurin B homologous protein 1	13897.7	17315.7	14813.1	3688.74	1909.67	6474.31	7364.86	6087.74	6267.52
B0R1E3;P70349	B0R1E3;P70349	Hint1	Histidine triad nucleotide binding protein 1;Adenosine 5'-monophosphoramidase HINT1	58356.2	50614.2	43622.9	26309.2	31190.4	27850.4	8080.66	6094.93	14712.3
B0V2M9;Q91VY5	B0V2M9;Q91VY5	Kdm4b	[histone H3]-trimethyl-L-lysine(9) demethylase;Lysine-specific demethylase 4B	12443.5	12420.8	9106.93	16109.1	15486.2	14105.9	11432.7	10850.2	12015.6
B0V2P5;F6RYL8;Q8BPN8	B0V2P5;F6RYL8;Q8BPN8	Dmxl2	Dmx-like 2;Dmx-like 2 (Fragment);DmX-like protein 2	4339	1205.31	722.884	837.997	4976.9	971.873			10.4882
B0V2W4	B0V2W4	Zfp952	Zinc finger protein 952	377505	392094	376629	170288	195069	239559	737480	709412	681274
B1APX2;Q3UE31	B1APX2;Q3UE31	5031439G07Rik;	RIKEN cDNA 5031439G07 gene;Uncharacterized protein KIAA0930 homolog	8461.86	11701.7	11509.7	3061.71	4460.21	2649.87	7219.81	2627.95	1691.54
B1AQ77;Q61414	B1AQ77;Q61414	Krt15	Keratin 15;Keratin, type I cytoskeletal 15	1.04711e+06	1.13331e+06	1.06135e+06	788772	828534	749898	763779	717730	799759
B1AQ78;P19001	B1AQ78;P19001	Krt19	Keratin 19;Keratin, type I cytoskeletal 19	15340.2	14665.7	13749.1	1736.44	2221.38	967.228	1917.45	1211.15	1224.32
B1AQD9;Q3V299;Q9Z2R6	B1AQD9;Q3V299;Q9Z2R6	Unc119	Unc-119 lipid binding chaperone;GMP phosphodiesterase delta subunit domain-containing protein;Protein unc-119 homolog A	602.261	326.049	298.672	3859.45	3032.67	3007.54	1109.44	750.575	1310.51
B1AQY2;F8VQ11;Q69ZH9	B1AQY2;F8VQ11;Q69ZH9	Arhgap23	Rho GTPase activating protein 23;Rho GTPase activating protein 23;Rho GTPase-activating protein 23	1944.05	2965.63	2325.94	3915.58	3615.11	3062.51	3404.77	4169.77	3276.01
B1AQY9;B1AQZ0;B7ZC46;Q8CHH9	B1AQY9;B1AQZ0;B7ZC46;Q8CHH9	Septin8	Septin;Septin 8;Septin;Septin-8	19056.6	23920.5	22231.1	15687.4	18278.9	19202	14206.7	16144.4	17369
B1AR09;Q3UPK1	B1AR09;Q3UPK1	Mllt6	Myeloid/lymphoid or mixed-lineage leukemia; translocated to, 6;PHD-type domain-containing protein (Fragment)	7074.06	6965.58	6991.8	5554.34	7161.6	6286.68	4321.1	5502.54	6266.39
B1AR17;E9Q614;F7C528	B1AR17;E9Q614;F7C528	Chd3	DNA helicase;DNA helicase;DNA helicase (Fragment)	25522.8	30981.8	23683.4	43462.4	38544.6	43959.8	46391.5	42917.8	32541.5
B1AR28;P50544	B1AR28;P50544	Acadvl	Acyl-Coenzyme A dehydrogenase, very long chain;Very long-chain specific acyl-CoA dehydrogenase, mitochondrial	4633.97	3082.99	4399.39	1628.41	1306.04	558.362	1738.55	1244.48	801.169
B1AR69	B1AR69	Myh13	Myosin, heavy polypeptide 13, skeletal muscle	7286.6	5114.84	6972.14	3077.45			2169.86
B1ARS9;G5E8W9;O88876	B1ARS9;G5E8W9;O88876	Dhrs3	Dehydrogenase/reductase (SDR family) member 3 (Fragment);Dehydrogenase/reductase (SDR family) member 3;Short-chain dehydrogenase/reductase 3	2814.17	1272.64	2525.9		231.09		2710.61	2873.6	1508.74
B1ART1;B1ART2	B1ART1;B1ART2	Vps13d	Vacuolar protein sorting 13D	9405.6	8286.2	9149.91	11440.7	10889.4	13396.5	10481.2	13223.9	11932.5
B1ARU4;E9QA63	B1ARU4;E9QA63	Macf1	Microtubule-actin cross-linking factor 1, isoforms 1/2/3/4;Microtubule-actin cross-linking factor 1, isoforms 1/2/3/4	16705.3	14856.8	17415.6	12351.5	11489.1	12731.1	9801.08	11459.8	11018.9
B1ARW4;Q99LY9	B1ARW4;Q99LY9	Ndufs5	NADH dehydrogenase [ubiquinone] iron-sulfur protein 5 (Fragment);NADH dehydrogenase [ubiquinone] iron-sulfur protein 5	2897.51	1154.22	346.256				747.932
B1ARW6;Q07243;Q8BSY2;Q9CZF3	B1ARW6;Q07243;Q8BSY2;Q9CZF3	Mtf1	Metal response element binding transcription factor 1 (Fragment);Metal regulatory transcription factor 1;C2H2-type domain-containing protein;Uncharacterized protein		1873.66	2381.15	3617.89		2912.99	18040.1	4118.63
B1AS14;Q9DB60	B1AS14;Q9DB60	Prxl2b	Peroxiredoxin like 2B (Fragment);Prostamide/prostaglandin F synthase
B1AS37;Q3U5B9;Q8BMY2;Q8BYA8;Q8R051;Q9D032	B1AS37;Q3U5B9;Q8BMY2;Q8BYA8;Q8R051;Q9D032	Ssbp3	Single-stranded DNA binding protein 3;Single-stranded DNA-binding protein 3;Single-stranded DNA-binding protein 3;Single-stranded DNA-binding protein 3;Ssbp3 protein;Single-stranded DNA-binding protein 3	94028.5	77659.1	67126.1	82837.7	103559	74231.8	78128	64741.9	58366.5
B1AS46	B1AS46	Casz1	Castor zinc finger 1	280007	19303.4	7174.27	40651.9	345650	282792	286383	390022	335698
B1ASA5	B1ASA5	Zfp362	Zinc finger protein 362	3214.22	2457.52	1721.81	3316.18	2349.12	2302.67	2611.52	2623.87	1285.01
B1ASE2;Q9DCX2	B1ASE2;Q9DCX2	Atp5h;Atp5pd	ATP synthase subunit d, mitochondrial (Fragment);ATP synthase subunit d, mitochondrial	16387.5	15476	13572.2	3148.62	3415.75	2281.04	7571.07	7802.52	8377.92
B1ASP2;P52332;Q3U8P8;Q3URU8;Q8K0I7	B1ASP2;P52332;Q3U8P8;Q3URU8;Q8K0I7	Jak1	Tyrosine-protein kinase;Tyrosine-protein kinase JAK1;Tyrosine-protein kinase;Tyrosine-protein kinase;Jak1 protein (Fragment)		4061.39	1574.22				1798.7
B1AST7;B1AST8;Q60592	B1AST7;B1AST8;Q60592	Mast2	non-specific serine/threonine protein kinase;non-specific serine/threonine protein kinase;Microtubule-associated serine/threonine-protein kinase 2	12845.2	8554.35	11129	3874.27	2193.69	4875.67	5617.44	1085.82	2271.81
B1ASY9;Q571K4	B1ASY9;Q571K4	Tab3	Mitogen-activated protein kinase kinase kinase 7 interacting protein 3;TGF-beta-activated kinase 1 and MAP3K7-binding protein 3	1509.66	3153.38	7224.76	12006.7	5723.53	6181.81		2472.69	2007.14
B1AT03;K4DI59;P97386;Q80ZH7	B1AT03;K4DI59;P97386;Q80ZH7	Lig3	DNA ligase;DNA ligase;DNA ligase 3;DNA ligase	12503.1	15342.2	11561.4	18359.6	18445.7	15863	19094.8	12065.6	8778.57
B1AT36;Q3TRH2;Q3U8F5;Q9D8W5	B1AT36;Q3TRH2;Q3U8F5;Q9D8W5	Psmd12	Proteasome (prosome, macropain) 26S subunit, non-ATPase, 12;Proteasome (prosome, macropain) 26S subunit, non-ATPase, 12;PCI domain-containing protein;26S proteasome non-ATPase regulatory subunit 12	8615.91	7209.54	7006.37	615.493	3277.64	1682.63	5348.82	1904.13	3101.6
B1AT82;B1AT84;Q8BK29;Q9D0M1	B1AT82;B1AT84;Q8BK29;Q9D0M1	Prpsap1	Phosphoribosyl pyrophosphate synthetase-associated protein 1;Phosphoribosyl pyrophosphate synthetase-associated protein 1;Ribose-phosphate pyrophosphokinase N-terminal domain-containing protein;Phosphoribosyl pyrophosphate synthase-associated protein 1	1470.51	2466.03	2738.86	1088.87
B1AT92;Q3U1Q4;Q3U5I5;Q60631	B1AT92;Q3U1Q4;Q3U5I5;Q60631	Grb2	Growth factor receptor bound protein 2;Growth factor receptor-bound protein 2;Growth factor receptor-bound protein 2;Growth factor receptor-bound protein 2	689.957	3197.18		19467.9	457.129			1133.57	827.106
B1ATC3;B7ZC94;Q3UHC0	B1ATC3;B7ZC94;Q3UHC0	Tnrc6c	Trinucleotide repeat containing 6C;Trinucleotide repeat containing 6C (Fragment);Trinucleotide repeat-containing gene 6C protein	27845.1	29304.4	24670.9	30105.1	26494.2	25939.7	16410	17334.7	13466.6
B1ATD4;B1ATD5;M0QW74;Q66I45;Q8K296;R4GML8	B1ATD4;B1ATD5;M0QW74;Q66I45;Q8K296;R4GML8	Mtmr3	Phosphatidylinositol-3-phosphate phosphatase (Fragment);Phosphatidylinositol-3-phosphate phosphatase;phosphatidylinositol-3-phosphatase;Phosphatidylinositol-3-phosphate phosphatase;Myotubularin-related protein 3;Phosphatidylinositol-3-phosphate phosphatase (Fragment)	20271.8	22112.3	21628.6	19187.5	17414.5	21141.8	13019.6	15476.5	16098.5
B1ATH0;Q9WV89	B1ATH0;Q9WV89	Stxbp4	Syntaxin binding protein 4 (Fragment);Syntaxin-binding protein 4	9957.91	8122.79	10709.5	13876.9	8836.43	13979.2	7604.21	11176	10719.1
B1ATI0;B1AV77;P47740;Q3U7B5;Q8BQ93;Q8C3C9;Q8C5J1;Q99PH3;Q99PH4	B1ATI0;B1AV77;P47740;Q3U7B5;Q8BQ93;Q8C3C9;Q8C5J1;Q99PH3;Q99PH4	Aldh3a2;Aldh3a2;Aldh3a2;Aldh3a2;;Aldh3a2;;Aldh3a2;Aldh3a2	Aldehyde dehydrogenase;Aldehyde dehydrogenase;Aldehyde dehydrogenase family 3 member A2;Aldehyde dehydrogenase;Aldehyde dehydrogenase;Aldehyde dehydrogenase;Aldehyde dehydrogenase;Aldehyde dehydrogenase;Aldehyde dehydrogenase	2847.04	3206.01	2209.32	1150.73	1874.98	4004.1	637.126	1297.22	1299.07
B1ATP7;Q3U0M8;Q80Y81	B1ATP7;Q3U0M8;Q80Y81	Elac2	Zinc phosphodiesterase ELAC protein 2	30873.9	46547.8	27298.8	85687.6	116845	64758.6	65189.7	51387.4	33962.2
B1ATR2;Q6ZPJ0	B1ATR2;Q6ZPJ0	Tex2	Testis expressed gene 2;Testis-expressed protein 2	9410.31	11203.5	11165.5	7205.77	8937.36	8365.07	11143	9422.65	9614.5
B1ATS4;B1ATS5;E9Q559;Q3U1K2;Q64518;Q8C213;Q8R0X5	B1ATS4;B1ATS5;E9Q559;Q3U1K2;Q64518;Q8C213;Q8R0X5	Atp2a3	Calcium-transporting ATPase;Calcium-transporting ATPase;Calcium-transporting ATPase;P-type Ca(2+) transporter (Fragment);Sarcoplasmic/endoplasmic reticulum calcium ATPase 3;P-type Ca(2+) transporter (Fragment);Calcium-transporting ATPase	1227.21	2604.24	322.858			1122.93
B1AU25;Q9Z0X1	B1AU25;Q9Z0X1	Aifm1	Apoptosis-inducing factor, mitochondrion-associated 1;Apoptosis-inducing factor 1, mitochondrial	12090.8	8177.23	7498.88	6920.45	5682.39	6111.96	8815.86	9678.29	6991.53
B1AU75;Q99MD9	B1AU75;Q99MD9	Nasp	Nuclear autoantigenic sperm protein	6264.06	6852.18	5135.99	9467.69	9698.22	9616.92	5043.99	4506.37	2618.41
B1AUC0	B1AUC0	Nfia	Nuclear factor 1	65729.6	56488.8	81726.5	56640.8	57450.7	52337.8	51513.8	51932.4	47868.6
B1AUH1;Q3V360	B1AUH1;Q3V360	Ptpru	Receptor-type tyrosine-protein phosphatase U;Protein tyrosine phosphatase, receptor type, U	3120.79		2328.31	1477.26	5357.83	1353.86	1376.28	2259.61	2397.16
B1AUQ7;Q9R1K9;Z4YJH1	B1AUQ7;Q9R1K9;Z4YJH1	Cetn2	Centrin 2 (Fragment);Centrin-2;Centrin 2	56331	53982	52127.6	9916.17	8315.98	6940.32	10278.4	9970.94	13372.7
B1AUY7;B1AUY8;Q540H0;Q684Q8;Q9QY36	B1AUY7;B1AUY8;Q540H0;Q684Q8;Q9QY36	Naa10	N-terminal amino-acid N(alpha)-acetyltransferase NatA;N-terminal amino-acid N(alpha)-acetyltransferase NatA;N-terminal amino-acid N(alpha)-acetyltransferase NatA;N-terminal amino-acid N(alpha)-acetyltransferase NatA (Fragment);N-alpha-acetyltransferase 10	2641.71	2133.43	2359.84	4776.53	7825.29	6972.19	4899.35	12519.2	5959.01
B1AV14;Q78IK4;Q9CZB4	B1AV14;Q78IK4;Q9CZB4	Apool	MICOS complex subunit;MICOS complex subunit Mic27;MICOS complex subunit	13669.3	4232.69	5409.19	2878.07	387.355	4203.25	2740.34	1385.4	1970.3
B1AV35;Q05AA6;Q3TZ53	B1AV35;Q05AA6;Q3TZ53	Drp2	Dystrophin related protein 2;Dystrophin-related protein 2;Dystrophin-related protein 2 (Fragment)	91658	85571.7	88874.1	73984.3	62825.6	63582.2	78575.1	63009.1	59664
B1AV60;B2RXX7;B7ZWM3;B9EJX2	B1AV60;B2RXX7;B7ZWM3;B9EJX2	Nhs	NHS actin remodeling regulator;Nhs protein;Nhs protein;NHS actin remodeling regulator	1.1698e+06	1102.69	2304.7	12284.1	13552.2	15056.6	6931.98	9985.2	5158.81
B1AV65;B1AV66;Q8BR70	B1AV65;B1AV66;Q8BR70	Yipf6	Yip1 domain family, member 6 (Fragment);Protein YIPF (Fragment);Protein YIPF6	15662.2	17122.3	13420	14087.5	6267.4	8742.21		61850.2
B1AVF2	B1AVF2	Tsc22d3	TSC22 domain family, member 3	7249.66	4094	11563.7	3937.42	12276.7	5729.7	12572	14700.1	12558.8
B1AVP5;Q8BHE1	B1AVP5;Q8BHE1	Gemin8	Gem nuclear organelle associated protein 8;Gem-associated protein 8	1276.36			360.601	573.364	478.035	558.164	1013.5	1173.9
B1AVU5;B1AVU6;B9EKM6	B1AVU5;B1AVU6;B9EKM6	Aadacl4;Aadacl4fm4;Aadacl4	Arylacetamide deacetylase like 4;AADACL4 family member 4;Predicted gene, OTTMUSG00000010747	7124.78
B1AVZ0	B1AVZ0	Uprt	Uracil phosphoribosyltransferase homolog	1988.32	3200.27	2326.46			1765.72			1876.93
B1AWB9;O88207	B1AWB9;O88207	Col5a1	Collagen, type V, alpha 1;Collagen alpha-1(V) chain	49931.6	41970.7	49879.9	27276.5	27939.3	27810.3	21260.9	19429.9	20363.1
B1AWE0;Q6PFA2	B1AWE0;Q6PFA2	Clta	Clathrin light chain	19198.7	18662.3	16261.3	8920.43	6063.84	7170.72	7898.97	6130.55	7101.65
B1AWI7;F6YT88;Q3TZ08;Q6VVW5	B1AWI7;F6YT88;Q3TZ08;Q6VVW5	Npr2	guanylate cyclase;Guanylate cyclase (Fragment);Guanylate cyclase (Fragment);Atrial natriuretic peptide receptor 2	6000.97	5318.7	3713.36	6014.03	5952.85	6852.33	6960.7	5613.72	5286.24
B1AX98;E9PV22;Q505F5	B1AX98;E9PV22;Q505F5	Lrrc47	Leucine rich repeat containing 47;Leucine rich repeat containing 47;Leucine-rich repeat-containing protein 47	2316.6	2654.12	1106.06	1947.68	3060.8	1827.07		1783.95	2390.88
B1AXD8	B1AXD8	Akirin2	Akirin-2				1038.19
B1AXF5;B7XGA6;E9Q7P8;P09242;Q3TJD3;Q3TQ02;Q8JZS4;Q9EQ79	B1AXF5;B7XGA6;E9Q7P8;P09242;Q3TJD3;Q3TQ02;Q8JZS4;Q9EQ79	Alpl;Alpl;Alpl;Alpl;Alpl;Alpl;Alpl;	alkaline phosphatase (Fragment);Alkaline phosphatase;Alkaline phosphatase (Fragment);Alkaline phosphatase, tissue-nonspecific isozyme;Alkaline phosphatase;Alkaline phosphatase;Alkaline phosphatase;Alkaline phosphatase		484.241	920.791	5439.57	7655.13	5336.74	2571.11	2593.97	3315.33
B1AXH1	B1AXH1	Nhsl2	NHS-like protein 2	2729.68	3059.84		3899.68	9699.33	11062.9	3702.57	2172.9	2620.39
B1AXH8;B1AXH9;Q3UQX8;Q61909;Q8C066	B1AXH8;B1AXH9;Q3UQX8;Q61909;Q8C066	Runx1t1	RUNX1 translocation partner 1;Runt-related transcription factor 1 translocated to, 1 (Cyclin D-related);RUNX1 translocation partner 1;Protein CBFA2T1;Protein CBFA2T1	1023.23	2126.96	17542.1	2776.6	2664.82	2734.97	3297.25	3087.27	2356.07
B1AXJ1;B1AXJ2;B2RPS6;Q3U3N6	B1AXJ1;B1AXJ2;B2RPS6;Q3U3N6	Tepsin	TEPSIN, adaptor related protein complex 4 accessory protein;TEPSIN, adaptor related protein complex 4 accessory protein;ENTH domain-containing protein;AP-4 complex accessory subunit Tepsin	7236.64	3679.18	4581.47	5833.39	3873.86	4398.14	4387.37	5270.77	7633.58
B1AY10	B1AY10	Nfx1	Transcriptional repressor NF-X1	5253.58	10630.3	3408.88	7327.23	4258.24	3504	5937.24	4272.03	4332.7
B1AY13;E9PV45	B1AY13;E9PV45	Usp24	Ubiquitin carboxyl-terminal hydrolase 24;ubiquitinyl hydrolase 1	424975	100117	312257	251262	354024	336376	311586	522538	568068
B1AY85;B1AY86;Q9DC11	B1AY85;B1AY86;Q9DC11	Plxdc2	Plexin domain containing 2;Plexin domain containing 2;Plexin domain-containing protein 2	12559.4	11031.7	12435.8	6932.71	6027.13	7527.88	8178.23	8426.9	7311.61
B1AYB5;B1AYB6;B1AYB7;F6Q8U1;Q69ZJ2	B1AYB5;B1AYB6;B1AYB7;F6Q8U1;Q69ZJ2	Mbd5	Methyl-CpG binding domain protein 5;Methyl-CpG-binding domain protein 5;Methyl-CpG binding domain protein 5;Methyl-CpG binding domain protein 5 (Fragment);MKIAA1461 protein (Fragment)			363.308		271.291	359.172
B1AYL1;Q62467	B1AYL1;Q62467	Scn7a	Sodium channel protein	40723.2	74348.4	53414.7	17290.6	18758.8	22021.6	35399.4	30430.2	31354
B1AYU7;Q8C5N3	B1AYU7;Q8C5N3	Cwc22	CWC22 spliceosome-associated protein;Pre-mRNA-splicing factor CWC22 homolog	63595.4	62591.5	59687.2	53325.5	60379.6	51604.7	52450.9	48225	45457.7
B1AZ14;B1AZ15;Q3UMF0	B1AZ14;B1AZ15;Q3UMF0	Cobll1	Cobl-like 1;Cobl-like 1;Cordon-bleu protein-like 1	57184.3	49302.6	54377.6	69566.2	80404.6	80948.5	49824.6	57746.7	63136.6
B1AZ46;Q3UKP6;Q8BKX1	B1AZ46;Q3UKP6;Q8BKX1	Baiap2	Brain-specific angiogenesis inhibitor 1-associated protein 2	8935.86	9016.25	12242.4	12588.7	13753.7	13285.8	13664.8	10860.6	12039.9
B1AZA5;D3YWD3	B1AZA5;D3YWD3	Tmem245	Transmembrane protein 245	77893	82839.9	80938.4	47117.6	50084.9	49949.7	66370.8	58404.4	68761.5
B1AZF3;B1AZF9;Q80YE4	B1AZF3;B1AZF9;Q80YE4	Aatk	Apoptosis-associated tyrosine kinase;Apoptosis-associated tyrosine kinase;Serine/threonine-protein kinase LMTK1	505.747	3941.54	2678.45	6599.45	3694.02	8956.73		5958.75	6208.94
B1AZI6	B1AZI6	Thoc2	THO complex subunit 2	2999.5	6493.93	4023.22	4425.31	5659.25	4409.99	6061.74	8801.87	7229.54
B1AZL1;J3QJZ1;Q8R2V2	B1AZL1;J3QJZ1;Q8R2V2	Iffo2;Gm21969;Iffo2	Intermediate filament family orphan 2;Predicted gene 21969;Intermediate filament family orphan 2	2165.02	401.632	1448.63	1379.55	3222.82	2743
B1AZP2;B7ZNS2;Q3UCF7	B1AZP2;B7ZNS2;Q3UCF7	Dlgap4	Disks large-associated protein 4;DLG associated protein 4;Disks large-associated protein 4 (Fragment)	899.581	1398.6	1514.44	1484.34	577.977	1725.08		1590.57	2708.28
B1B0C7;E9PZ16	B1B0C7;E9PZ16	Hspg2	Perlecan (heparan sulfate proteoglycan 2)	3865.41	2885.18	2616.82	3381.59	2518.24	2579.65	1925.38	2010.48	1273.33
B1B0E8	B1B0E8	Zrsr2	Zinc finger (CCCH type), RNA binding motif and serine/arginine rich 2	4939.39	5359.44	6287.37	1147.99	1397.29	867.581	16518.4	6557.2	5638.75
B1B1A8;Q6PDN3	B1B1A8;Q6PDN3	Mylk	Myosin light chain kinase, smooth muscle;Myosin light chain kinase, smooth muscle	106786	105553	98914.3	57528.5	57247.7	56208.4	53990.1	59262.2	56653.4
B1Q2W7;D3YZK4;Q80UV9;S4R1B9	B1Q2W7;D3YZK4;Q80UV9;S4R1B9	Taf1	Transcription initiation factor TFIID subunit;Transcription initiation factor TFIID subunit;Transcription initiation factor TFIID subunit 1;TATA-box binding protein associated factor 1	8940.91		12682.1	7751.62	6123.36	4912.4	4623.81	8478.57	18674.9
B1Q450	B1Q450	HBB1	Hemoglobin beta chain subunit	9300.37			23134.4	21162	20736.3	214294	2426.03	3163.79
B2B9E1	B2B9E1	Triqk	Triple QxxK/R motif-containing protein						1258.56
B2CY76;P29812	B2CY76;P29812	Dct	Dopachrome tautomerase;L-dopachrome tautomerase					3739.22	3370.92
B2CY77;P14206	B2CY77;P14206	Rpsa	Laminin receptor (Fragment);Small ribosomal subunit protein uS2	11841.3	14510.5	13941.2	8607.19	7801.22	8959.57	4798.29	7672.98	7778.61
B2KF06;Q3V1D5	B2KF06;Q3V1D5	Pnpla1	Patatin-like phospholipase domain containing 1;Omega-hydroxyceramide transacylase		136.656	626.858	2898.07	491.949	3301.68	1249.47	1196.16
B2KF50;Q570Z6	B2KF50;Q570Z6	Bltp3a	UHRF1 (ICBP90) binding protein 1;MKIAA4127 protein (Fragment)	12199.8	9197.04	7121.06	9054.83	12174.7	6473.21	3417.09	17801.4	3841.08
B2KF83;L7N466;Q3TYX5;Q9D110	B2KF83;L7N466;Q3TYX5;Q9D110	Mthfs;Mthfsl;Mthfs;Mthfs	5, 10-methenyltetrahydrofolate synthetase;5-formyltetrahydrofolate cyclo-ligase;5-formyltetrahydrofolate cyclo-ligase;5-formyltetrahydrofolate cyclo-ligase	4318.6	4150.46	2029.92	4006.45	4195.62	3089.01	4072.08	2440.41	2856
B2KFM4;B2KFM9;E9PVR0;Q2TBA9;X2FV61	B2KFM4;B2KFM9;E9PVR0;Q2TBA9;X2FV61	Sox5	SRY (sex determining region Y)-box 5;SRY (sex determining region Y)-box 5;SRY (sex determining region Y)-box 5;SRY (sex determining region Y)-box 5;Sox5-BLM isoform	6130.46	9960.52	8266.62	10982.6	10478.3	10306.8	5716.19	6843.15	6095.81
B2KFW1	B2KFW1	Zscan20	Zinc finger and SCAN domain-containing protein 20	7024.8		5697.95	2154.01	863.709	1248.17
B2KGT5;Q3TLQ0;Q80ZL4	B2KGT5;Q3TLQ0;Q80ZL4	Map2	Microtubule-associated protein	2463.64	2489.85	1989.49	9.4677	1574.15	3707.44			20732.9
B2M0S2;B2M0S3;E9Q855;O35609;Q3TDM8;Q3UK26;Q3UXS0	B2M0S2;B2M0S3;E9Q855;O35609;Q3TDM8;Q3UK26;Q3UXS0	Gm45927;Gm45927;Scamp3;Scamp3;Scamp3;Scamp3;Scamp3	Secretory carrier-associated membrane protein;Secretory carrier-associated membrane protein;Secretory carrier-associated membrane protein;Secretory carrier-associated membrane protein 3;Secretory carrier-associated membrane protein;Secretory carrier-associated membrane protein;Secretory carrier-associated membrane protein	105872	101992	103637	66228.3	63889	70389.7	72147.5	78476.5	77443.2
B2M1R6;P61979;Q3TL71;Q3TUA1;Q5FWJ5	B2M1R6;P61979;Q3TL71;Q3TUA1;Q5FWJ5	Hnrnpk	Heterogeneous nuclear ribonucleoprotein K	51559.6	48243.1	46278	55952.6	57418.7	62938.3	54406.9	44928.9	36868.4
B2M1R7;Q61990	B2M1R7;Q61990	Pcbp2	Poly(RC) binding protein 2;Poly(rC)-binding protein 2	14121.1	12063.6	12451.9	49186	42764.3	43068.4	15629.6	16177	15441.3
B2MWM9;P14211	B2MWM9;P14211	Calr	Calreticulin	41856	32907.8	36863.4	13467.6	11022	15147.2	12028.4	11476	11792.8
B2RPU6;B7SNM8;B7SNM9;B7ZMS8;E9PW14;E9Q0B1;Q9D067	B2RPU6;B7SNM8;B7SNM9;B7ZMS8;E9PW14;E9Q0B1;Q9D067	Mdm1	Nuclear protein MDM1	7872.88	8045.47	8061.04	4387.8	4283.35	3544.97	5264.55	4870.3	3239.3
B2RPU7;P58334;Q811R6	B2RPU7;P58334;Q811R6	Klf16;Klf16;	Kruppel-like factor 16;Krueppel-like factor 16;Dopamine receptor regulating factor (Fragment)	2692.44	2997.88	4734.19	7699.4	7429.72	6936.92	17348	14628.6	10764.4
B2RPU8;Q8CEW7	B2RPU8;Q8CEW7	Zbed5	Coiled-coil-helix-coiled-coil-helix domain containing 2-like;DUF4371 domain-containing protein	881.441	2200.2	1374.09	2212.69	1117.88	695.751	1711.63	1651.54	1800.95
B2RPV4;Q66JV4;Q80YR9	B2RPV4;Q66JV4;Q80YR9	Rbm12b2;Rbm12b2;Rbm12b1	C430048L16Rik protein;RNA-binding protein 12B-B;RNA-binding protein 12B-A	7031.92	7696.71		4087.21	8531.52	3501.8	3407.25	4874.08
B2RPZ5;D6REW0;Q8BRS0;Q8C9P8;Q8CDU6	B2RPZ5;D6REW0;Q8BRS0;Q8C9P8;Q8CDU6	Hectd2	HECT-type E3 ubiquitin transferase;HECT domain E3 ubiquitin protein ligase 2;E3 ubiquitin-protein ligase HECTD2;E3 ubiquitin-protein ligase HECTD2;Probable E3 ubiquitin-protein ligase HECTD2				1703.31	2057.21	4567.99	2189.89	1101.25	1221.04
B2RQ06;Q9JKD9	B2RQ06;Q9JKD9	Zbtb32	Zinc finger and BTB domain containing 32;Zinc finger and BTB domain-containing protein 32	199284	111983	175671	673190	714684	718294	370366	358145	331727
B2RQ14;Q8CDA1	B2RQ14;Q8CDA1	Inpp5f	Inositol polyphosphate-5-phosphatase F;Phosphatidylinositide phosphatase SAC2	7506.08	6365.5	7795.44	5813.21	5731.79	4619.17	5650.28	6022.04	6273.54
B2RQ57;B7ZMZ2;F8VQH0;Q4JIM5	B2RQ57;B7ZMZ2;F8VQH0;Q4JIM5	Abl2	Tyrosine-protein kinase;Tyrosine-protein kinase;Tyrosine-protein kinase;Tyrosine-protein kinase ABL2	16431	19097.8	18264.5	25646	19756.7	23073.9	16096.8	17433.3	15362.3
B2RQ80;B2RXX2;B2RY17;B9EKN8;E0CXD6;E0CY98;E0CZD7;E0CZF8;E9PUL9;P83510	B2RQ80;B2RXX2;B2RY17;B9EKN8;E0CXD6;E0CY98;E0CZD7;E0CZF8;E9PUL9;P83510	Tnik	TRAF2 and NCK interacting kinase;Tnik protein;Tnik protein;TRAF2 and NCK interacting kinase;TRAF2 and NCK interacting kinase;TRAF2 and NCK interacting kinase;TRAF2 and NCK interacting kinase;TRAF2 and NCK interacting kinase;TRAF2 and NCK interacting kinase;Traf2 and NCK-interacting protein kinase	68578.7	67805.5	61277.6	42822.3	42954.5	49867.4	37732.8	42647.8	40067.6
B2RQC2;Q8BY93;Q8C0Z2	B2RQC2;Q8BY93;Q8C0Z2	Usp42	Ubiquitin carboxyl-terminal hydrolase 42;Uncharacterized protein (Fragment);Uncharacterized protein (Fragment)
B2RQC6;E9QAI5;G3UWN2	B2RQC6;E9QAI5;G3UWN2	Cad	CAD protein;CAD protein;Carbamoyl-phosphate synthetase 2, aspartate transcarbamylase, and dihydroorotase	92544.1	108320	140996	134974	142886	136994	135822	105671	102188
B2RQE5;B7ZN48;B7ZN49;B7ZN50;Q5DQR4	B2RQE5;B7ZN48;B7ZN49;B7ZN50;Q5DQR4	Stxbp5l	Syntaxin binding protein 5-like;Stxbp5l protein;Stxbp5l protein;Stxbp5l protein;Syntaxin-binding protein 5-like	4672.78		3770.74	818.831	2678	1744
B2RQE8	B2RQE8	Arhgap42	Rho GTPase-activating protein 42	9.28758	9565.21	15066.7			2247.42
B2RQH0;Q7TSF1	B2RQH0;Q7TSF1	Dsg1b	Desmoglein 1 beta;Desmoglein-1-beta	1246.87	1304.25		1275.52	743.077	928.741	391.618	408.003
B2RQK7;Q8BWB1	B2RQK7;Q8BWB1	Synpo2l	Synaptopodin 2-like;Synaptopodin 2-like protein	25435.1	36841.9	40079.7	18849.6	15522.3	16058.1	26311.1	26000.5	23076.2
B2RQQ1;Q02566	B2RQQ1;Q02566	Myh6	Myosin, heavy polypeptide 6, cardiac muscle, alpha;Myosin-6	4871.6	4395.36	6948.47						582.742
B2RQQ5;P14873	B2RQQ5;P14873	Map1b	Microtubule-associated protein 1B	84393.9	88087.1	83993.9	65519.2	65985.1	67230.8	58157.1	64354.2	59441.7
B2RQQ8;P08122	B2RQQ8;P08122	Col4a2	Collagen, type IV, alpha 2;Collagen alpha-2(IV) chain		1390.3	1306.41		1152.36	1268.98			1799.86
B2RQR2;D3YUX2;Q8VBX6	B2RQR2;D3YUX2;Q8VBX6	Mpdz	Mpdz protein;Multiple PDZ domain crumbs cell polarity complex component;Multiple PDZ domain protein	8877.46	4026.35	4557.67	8326.87	5765.23	9506.69	4039.15	9273.59	1630.85
B2RQS1;B3STQ1;Q3TNV4;Q3UTR6;Q9ERG2	B2RQS1;B3STQ1;Q3TNV4;Q3UTR6;Q9ERG2	Strn3	Striatin, calmodulin binding protein 3;Striatin-3 35 kDa variant;Striatin N-terminal domain-containing protein (Fragment);Striatin N-terminal domain-containing protein (Fragment);Striatin-3	16734.6	11356.5	17692.8	11968.7	8414.69	8360.48	7469.04	10237.8	9543.59
B2RQS6;Q8VHK9	B2RQS6;Q8VHK9	Dhx36	RNA helicase;ATP-dependent DNA/RNA helicase DHX36				993.095	1093.34	1054.04			722.026
B2RQZ6;Q8BWS5	B2RQZ6;Q8BWS5	Gprin3	GPRIN family member 3;G protein-regulated inducer of neurite outgrowth 3	734.499			1996.21	2389.59	1648.77			18886.4
B2RR26;Q8BZW8;Q8C1S8;Q9CW64	B2RR26;Q8BZW8;Q8C1S8;Q9CW64	Nhlrc2	NHL repeat containing 2;NHL repeat-containing protein 2;NHL repeat-containing protein 2;Thioredoxin domain-containing protein (Fragment)	5010.68	2350.97	2624.81		2803.47	3147.41	3065.1	7052.36
B2RRF3;Q8C341	B2RRF3;Q8C341	Suco	AI848100 protein;SUN domain-containing ossification factor	2018.87			3293.46	2423.11	2567.74	1296.84	2129.79	2543.1
B2RRH9;Q3THK7	B2RRH9;Q3THK7	Gmps	GMP synthase (glutamine-hydrolyzing);GMP synthase [glutamine-hydrolyzing]	78523.6	82986.4	80575	96390	97745.3	94057.8	89824.2	93985.7	85980.1
B2RRI1;B2RRI4;B7ZNJ0;E9PXU2;Q3UEW9;Q3UNK7;Q3UV09;Q9Z0F8	B2RRI1;B2RRI4;B7ZNJ0;E9PXU2;Q3UEW9;Q3UNK7;Q3UV09;Q9Z0F8	Adam17	Adam17 protein;Adam17 protein;A disintegrin and metallopeptidase domain 17;A disintegrin and metallopeptidase domain 17;A disintegrin and metallopeptidase domain 17;Disintegrin and metalloproteinase domain-containing protein 17;Disintegrin and metalloproteinase domain-containing protein 17;Disintegrin and metalloproteinase domain-containing protein 17	35116.5	30412.3	32334	63291.5	64386	80378.4	61324	65385.1	67759.6
B2RRX1;P60710	B2RRX1;P60710	Actb	Actin, beta;Actin, cytoplasmic 1	525351	566738	508745	225492	223193	227591	355672	341247	354211
B2RS09;I7HPW1;Q7JJ13	B2RS09;I7HPW1;Q7JJ13	Brd2	Bromodomain containing 2;Bromodomain containing 2 (Fragment);Bromodomain-containing protein 2	14135.5	18850	24968.3	5290.68	9414.57	6269.34	6700.05	13578.6	9391.52
B2RSV4;Q921M3	B2RSV4;Q921M3	Sf3b3	Splicing factor 3b, subunit 3;Splicing factor 3B subunit 3	5614.43	6340.38	8259.58	3233.43	4504.11	3691.05	3903.07	2978.17	3952.14
B2RSV7;Q69ZL1	B2RSV7;Q69ZL1	Fgd6	Fgd6 protein;FYVE, RhoGEF and PH domain-containing protein 6	3637.73	4101.71	3686.19	3231.47	3433.08	2556.38	2354.33	1603.58	2219.22
B2RSW8;Q9R0L6	B2RSW8;Q9R0L6	Pcm1	Pericentriolar material 1;Pericentriolar material 1 protein	85341.5	79286.5	85301.7	93009.2	96084	90735.8	72864.6	79737.4	76504.8
B2RT14;D3YZ96;D3YZE6;D3Z748;D3Z7G0;D6RH94;E9PXN7;G3UZC9;K9J7B2;P70691;Q5FW80;Q62452;Q63886;Q64435;Q6NSR5;Q6XL43;Q6XL46;Q6XL48;Q6ZQM8;Q76K67;Q8R0P3	B2RT14;D3YZ96;D3YZE6;D3Z748;D3Z7G0;D6RH94;E9PXN7;G3UZC9;K9J7B2;P70691;Q5FW80;Q62452;Q63886;Q64435;Q6NSR5;Q6XL43;Q6XL46;Q6XL48;Q6ZQM8;Q76K67;Q8R0P3	Ugt1a5;Ugt1a7c;Ugt1a6a;Ugt1a8;Ugt1a10;Ugt1a7c;Ugt1a10;Ugt1a10;Ugt1a6b;Ugt1a2;Ugt1a10;Ugt1a9;Ugt1a1;Ugt1a6;Ugt1a6a;Ugt1a10;Ugt1a6b;Ugt1a5;Ugt1a7;Ugt1a5;Ugt1a6b	UDP-glucuronosyltransferase;UDP-glucuronosyltransferase (Fragment);UDP-glucuronosyltransferase (Fragment);UDP-glucuronosyltransferase;UDP-glucuronosyltransferase (Fragment);UDP glucuronosyltransferase 1 family, polypeptide A7C;UDP-glucuronosyltransferase;UDP-glucuronosyltransferase (Fragment);UDP-glucuronosyltransferase;UDP-glucuronosyltransferase 1-2;UDP-glucuronosyltransferase;UDP-glucuronosylt…	5583.3	2367.45	6458.93	4535.3	3799.18	1690.2	2236.86	1539.98	1586.87
B2RT41	B2RT41	Zfc3h1	Zinc finger, C3H1-type containing	35068.9	29531.2	25907.9	12665.6	11507.1	15578	10093.3	10277.4	10032.5
B2RT71;P56567	B2RT71;P56567	Csta1;Csta	Cystatin A;Cystatin-A	9434.44	7380.04	10186.8	6843.04	8137.99	10241.8	4587.3	5564.01	4176.19
B2RT77;Q78WZ7	B2RT77;Q78WZ7	Polr1f	DNA-directed RNA polymerase subunit;DNA-directed RNA polymerase I subunit RPA43	491.657				2771.78	4876.32
B2RT97;E9Q5I9;Q9WVJ2	B2RT97;E9Q5I9;Q9WVJ2	Psmd13	26S proteasome non-ATPase regulatory subunit 13	626.815	544.245	828.266	500.395	201.931	493.241	307.142	554.422	120.842
B2RTB0;Q3UHX2	B2RTB0;Q3UHX2	Pdap1	PDGFA associated protein 1;28 kDa heat- and acid-stable phosphoprotein		1896.76		574.21	1130.49	603.805			4061.64
B2RTB6;P97861;Q9ERE2	B2RTB6;P97861;Q9ERE2	Krt86;Krt86;Krt81	Keratin 86;Keratin, type II cuticular Hb6;Keratin, type II cuticular Hb1	13620.8	19442.4	14436.1	64499.7	12723.8	43626.6	95091.4	140517	139955
B2RTE3;Q4FK66	B2RTE3;Q4FK66	Prpf38a	Pre-mRNA-splicing factor 38A	173970	184109	195571	73965	82386.8	87887.9	84661.7	79013.7	73749.6
B2RTE5;E0CYE3;Q3TMW1	B2RTE5;E0CYE3;Q3TMW1	Ccdc102a	Coiled-coil domain containing 102A;Coiled-coil domain containing 102A (Fragment);Coiled-coil domain-containing protein 102A	207.652			116.341	124.04			8641.74
B2RTL5;O35945	B2RTL5;O35945	Aldh1a7	Aldehyde dehydrogenase family 1, subfamily A7;Aldehyde dehydrogenase, cytosolic 1	5468.68	5991.02	4544.71	5144.71	3905.98	4258.51		3235.12	9165.31
B2RTM0;P62806	B2RTM0;P62806	Hist2h4;H4c1	Histone H4	38923.1	34447.5	38123.8	17592.4	17985.9	20378.1	49002.1	45561.4	53502.3
B2RTN5;Q3TSU7;Q91YM2	B2RTN5;Q3TSU7;Q91YM2	Arhgap35	Glucocorticoid receptor DNA binding factor 1;Rho GTPase-activating protein 35 (Fragment);Rho GTPase-activating protein 35	17530.3	24426	26491.6	48456.1	55421.7	51283.3	33554.7	32713.8	33277.8
B2RTP7;Q3TTY5	B2RTP7;Q3TTY5	Krt2	Krt2 protein;Keratin, type II cytoskeletal 2 epidermal	91394.8	140634	93170.9	37950.5	38761.4	30064.1	6389.35	7330.43	6153.27
B2RU72;Q9Z320	B2RU72;Q9Z320	Krt27	Keratin 27;Keratin, type I cytoskeletal 27	1975.59		2928.35	161172	214849	201083	37099.2	29362.2	35971.7
B2RU79;D3Z598;E9QPS5;Q8K4G1	B2RU79;D3Z598;E9QPS5;Q8K4G1	Ltbp4	Latent transforming growth factor beta binding protein 4;Latent transforming growth factor beta binding protein 4;Latent transforming growth factor beta binding protein 4;Latent-transforming growth factor beta-binding protein 4	130359	131520	134477	38230.7	44945	40965.8	61935.5	54982.7	50725.5
B2RUA5;Q7TSI3	B2RUA5;Q7TSI3	Ppp6r1	SAPS domain family, member 1;Serine/threonine-protein phosphatase 6 regulatory subunit 1	32728.7	31779.9	30833.5	14025.5	15883.5	14499.2	17092.7	13356	13562.8
B2RUC3;E9QM61;P35689;Q3TPQ3;Q3TUN4;Q3TUT3;Q3UV64;Q6P9Q0	B2RUC3;E9QM61;P35689;Q3TPQ3;Q3TUN4;Q3TUT3;Q3UV64;Q6P9Q0	Ercc5	Excision repair cross-complementing rodent repair deficiency, complementation group 5;Excision repair cross-complementing rodent repair deficiency, complementation group 5;DNA excision repair protein ERCC-5;DNA repair protein complementing XP-G cells (Fragment);XPG-I domain-containing protein (Fragment);XPG-I domain-containing protein (Fragment);DNA repair protein complementing XP-G cells (Fragme…	56945.3	53776.6	54829.8	64443.7	59048.1	58207.2	42613.4	45453.2	47394.2
B2RUC7;Q9Z1Z2	B2RUC7;Q9Z1Z2	Strap	Serine/threonine kinase receptor associated protein;Serine-threonine kinase receptor-associated protein	3139.9	1904.22	1300.5	746.766	378.624	1214.82		1161.1	737.5
B2RUD1;D3YV67;P52875	B2RUD1;D3YV67;P52875	Tmem165	GDT1 family protein;GDT1 family protein (Fragment);Transmembrane protein 165		4503.5	5864.49		271.727		4354.1
B2RUD7;E9PZ00;J3QPG5;K3W4L3;Q3TIT5;Q3TKB2;Q3TKK3;Q3TWE9;Q3TWF9;Q3TWL8;Q3TWM9;Q3TXJ0;Q3TXP9;Q3U5W2;Q3U825;Q3U897;Q3U8C4;Q3UAS4;Q3UE29;Q3UFE8;Q61207;Q8BFQ1	B2RUD7;E9PZ00;J3QPG5;K3W4L3;Q3TIT5;Q3TKB2;Q3TKK3;Q3TWE9;Q3TWF9;Q3TWL8;Q3TWM9;Q3TXJ0;Q3TXP9;Q3U5W2;Q3U825;Q3U897;Q3U8C4;Q3UAS4;Q3UE29;Q3UFE8;Q61207;Q8BFQ1	Psap	Psap protein;Prosaposin;Prosaposin;Prosaposin;Prosaposin;Prosaposin;Prosaposin;Prosaposin;Prosaposin;Prosaposin;Prosaposin (Fragment);Prosaposin;Prosaposin;Prosaposin;Prosaposin;Prosaposin;Prosaposin;Prosaposin;Prosaposin;Prosaposin;Prosaposin;Prosaposin	5529.44	3184.45	3531.63	1932.86	3201.28	4101.15		1199.5
B2RUE3;E9Q9S3;Q6EJB6	B2RUE3;E9Q9S3;Q6EJB6	Utp14b	UTP14, U3 small nucleolar ribonucleoprotein, homolog B (Yeast);UTP14B small subunit processome component;U3 small nucleolar RNA-associated protein 14 homolog B	1512.65	526.031	2219.26	2660.84	3956.81	2899.3	5401.31	3868.05	2958.29
B2RUG4;B7ZNV2;Q61602	B2RUG4;B7ZNV2;Q61602	Gli3	GLI-Kruppel family member GLI3;GLI-Kruppel family member GLI3;Transcriptional activator GLI3	325842	295773	278322	197770	301703	277830	96508.9	149876	110724
B2RUG7;O88532	B2RUG7;O88532	Zfr	Zinc finger RNA binding protein;Zinc finger RNA-binding protein	10960.7	9754.36	12460.8	8204.88	5252.5	7809.07	1368.54	3538.01	3404.71
B2RUG8;D6REV1;F6WV21;Q8BZ32	B2RUG8;D6REV1;F6WV21;Q8BZ32	Asxl2	Asxl2 protein;ASXL transcriptional regulator 2;ASXL transcriptional regulator 2;Putative Polycomb group protein ASXL2	13742.4	15235.9	16020	23090.4	21557.7	23933.3	16803.8	21233.9	19669.4
B2RUG9;E9QLQ9	B2RUG9;E9QLQ9	Apc	APC, WNT signaling pathway regulator;APC, WNT signaling pathway regulator	3965.07	4688.37	5280.96	4411.72	4848.13	4550.23	2035.24	3066.13	1375.16
B2RUJ5;Q3UH26	B2RUJ5;Q3UH26	Apba1	Amyloid-beta A4 precursor protein-binding family A member 1	7315.61	7004.19	6428.95	3278.43	5682.04	3297.88	2149.43	2261.09	3967.92
B2RUJ6;Q5NCJ0;Q5NCJ1	B2RUJ6;Q5NCJ0;Q5NCJ1	Rapgef6	Rap guanine nucleotide exchange factor (GEF) 6	1560.72	2080.86	1654.21	6575.94	7250.82	4735.38	5491.33	4889.15	3922.62
B2RUJ7;Q00519;Q3UMS6	B2RUJ7;Q00519;Q3UMS6	Xdh	Xanthine dehydrogenase/oxidase	1834.94	3050.18	1623.3	820.889	1165.77	956.32	1474.79	419.853	472.492
B2RUK0;G3UXJ5;G8JL85;Q3V1Z0;Q80U22	B2RUK0;G3UXJ5;G8JL85;Q3V1Z0;Q80U22	Rusc2	Rusc2 protein;RUN and SH3 domain containing 2;RUN and SH3 domain containing 2;RUN and SH3 domain containing 2;AP-4 complex accessory subunit RUSC2	45785.7	22160.5	20380	9316.41	8705.25	4954.93	4016.4	3704.04	3185.09
B2RUK2;B7ZNX6	B2RUK2;B7ZNX6	Erbin	Erbb2 interacting protein	12167.8	13780.8	10861.1	15817.9	15322.2	13698	11458.3	13716.3	15269.5
B2RUK5;Q3ULD5;Q6PD20	B2RUK5;Q3ULD5;Q6PD20	Mccc2	methylcrotonoyl-CoA carboxylase;Methylcrotonoyl-CoA carboxylase beta chain, mitochondrial;Mccc2 protein (Fragment)			4995.11			4651.97
B2RUP8;Q3UMW8	B2RUP8;Q3UMW8	Cln5	Ceroid-lipofuscinosis, neuronal 5;Ceroid-lipofuscinosis neuronal protein 5 homolog	2601.12	410.614	3032.09	2865.84	221.443	410.743		432.625	201.403
B2RUR0;O35601	B2RUR0;O35601	Fyb;Fyb1	FYN binding protein;FYN-binding protein 1	14675.1	9702.15	8824.42	5287.32	4366.24	4687.64	2405.18	4085.55	3369.77
B2RUR3;P06795	B2RUR3;P06795	Abcb1b	ATP-binding cassette, sub-family B (MDR/TAP), member 1B;ATP-dependent translocase ABCB1
B2RUR4	B2RUR4	Kprp	Keratinocyte proline-rich protein	19585.1	6938.98	12812.3	4464.48	15497.9	12824.1	15679	447.332	15148.8
B2RUR8	B2RUR8	Otud7b	OTU domain-containing protein 7B	8305.46	5886.09	5542.23	5604.13	6588.27	4283.24	7124.68	715.139	1535.4
B2RVI6;Q9CZ92	B2RVI6;Q9CZ92	Cenpp	Centromere protein P						3067.77
B2RVL0;Q5SS90	B2RVL0;Q5SS90	Gm11992	Predicted gene, OTTMUSG00000005148;Uncharacterized protein C7orf57 homolog	5377.05	7483.35	3424.58	16667.4	8750.75	13452.6	8954.71	9564.51	6443.98
B2RVP5;P0C0S6;Q3THW5	B2RVP5;P0C0S6;Q3THW5	H2az2;H2az1;H2az2	Histone H2A;Histone H2A.Z;Histone H2A.V	63365	60546.4	57500	19412.1	18895.2	19892	64677.6	73494.6	70427.5
B2RVW5;Q3UQS2	B2RVW5;Q3UQS2	Lsmem1	Gene model 889, (NCBI);Leucine-rich single-pass membrane protein 1				5193.89	8077.41	8977.72	4253	4994.28	5742.03
B2RW20;E9QN41;Q8C9H6	B2RW20;E9QN41;Q8C9H6	Strip2	Family with sequence similarity 40, member B;Striatin interacting protein 2;Striatin-interacting proteins 2	9116.1	10038.7	11180.2	4022.78	2046.81	2692.88	21610.8	136473	20272
B2RWS6	B2RWS6	Ep300	Histone acetyltransferase p300	29950.8	34171.8	21715.4	27403.6	27684.9	33033.2	21118.3	23528.6	20576.9
B2RWS7;Q8BZ47	B2RWS7;Q8BZ47	Zfp609;Znf609	Zinc finger protein 609	15640.5	16130	15622.3	28737.7	28936.4	28564.1	22275.3	22729.1	23215.1
B2RWU2;Q3UHF7	B2RWU2;Q3UHF7	Hivep2	Immunodeficiency virus type I enhancer binding protein 2;Transcription factor HIVEP2	977.905	580.973		2586.45	2788.79	3770.86	1513.68	2608.04	1572.17
B2RWU4;G3UWY3;Q5NBX1	B2RWU4;G3UWY3;Q5NBX1	Cobl	Cordon-bleu;Cordon-bleu WH2 repeat;Protein cordon-bleu	37256.5	29113.3	30736.5	30922.9	32203	31702	24201.9	22828.8	21937
B2RWV7;B7ZND7;Q8BQ30	B2RWV7;B7ZND7;Q8BQ30	Ppp1r18	2310014H01Rik protein;2310014H01Rik protein;Phostensin	12270.4	16128.1	13459.7	17013.6	14568.5	17924.5	16100.7	15115.1	18453.6
B2RWW2;E9PVZ8;E9QAH1	B2RWW2;E9PVZ8;E9QAH1	Golgb1	Golgb1 protein;Golgi autoantigen, golgin subfamily b, macrogolgin 1;Golgi autoantigen, golgin subfamily b, macrogolgin 1	18586.8	14442.3	16739.2	9381.3	10188.7	10732	8923.07	11042.6	11436.8
B2RWX2;B2RXW7;P01029	B2RWX2;B2RXW7;P01029	C4b	Complement component 4B (Childo blood group);Complement component 4B (Childo blood group);Complement C4-B	20151.4	5879.75	8545.66	3906.92	6564.32	2861.67	6493.53	3480.69	8092.86
B2RWY1;Q3ULB5;Q8BVB0;Q8C015	B2RWY1;Q3ULB5;Q8BVB0;Q8C015	Pak6;Pak6;Pak5;Pak5	non-specific serine/threonine protein kinase;Serine/threonine-protein kinase PAK 6;non-specific serine/threonine protein kinase;Serine/threonine-protein kinase PAK 5
B2RX00;Q9ESK9	B2RX00;Q9ESK9	Rb1cc1	RB1-inducible coiled-coil 1;RB1-inducible coiled-coil protein 1	6245.53	8267.16	6340.68	6473.89	7122.7	6293.77	5457.12	7212.01	5573.36
B2RX08;Q3UGX2;Q3UGY4	B2RX08;Q3UGX2;Q3UGY4	Sptb	Spectrin beta chain	22785.5	22829.5	23691.8	11038.1	10016.5	8546.94	9516.5	12413.4	10821.6
B2RX56;Q8CE97	B2RX56;Q8CE97	Gm14137	OTTMUSG00000015762 protein;Uncharacterized protein C15orf62 homolog, mitochondrial	1605.28			1306.91	794.547	209.323
B2RX66;Q5F2E8	B2RX66;Q5F2E8	Taok1	TAO kinase 1;Serine/threonine-protein kinase TAO1	2568.01	4390.89	4406.79	5912.4	8732.05	5532.08	4599.34	5568.76	4184.66
B2RX77;F6QK97;Q9D483	B2RX77;F6QK97;Q9D483	Polr3c	DNA-directed RNA polymerase III subunit RPC3;DNA-directed RNA polymerase III subunit RPC3 (Fragment);DNA-directed RNA polymerase III subunit RPC3	7808.38	6189.23	6515.41	3378.67	4441.19	3003.36	6137.69	5894.12	5481.86
B2RXC1	B2RXC1	Trappc11	Trafficking protein particle complex subunit 11
B2RXC2;Q8BKB2	B2RXC2;Q8BKB2	Itpkb	Kinase;Uncharacterized protein (Fragment)	9807.44	10571.6	9481.49	11974	12276.6	13395.7	13277.3	11868.6	11718.8
B2RXC6;Q7TSI4	B2RXC6;Q7TSI4	Polr3a	DNA-directed RNA polymerase subunit		621.363				692.113	300.545
B2RXC8;G3X9E8;Q3V1Y6;Q8BM38;Q8K2F4	B2RXC8;G3X9E8;Q3V1Y6;Q8BM38;Q8K2F4	Ppp2r3a	3222402P14Rik protein;Protein phosphatase 2, regulatory subunit B'', alpha;EF-hand domain-containing protein;EF-hand domain-containing protein;3222402P14Rik protein	2158.63	809.398	756.209				1697.38	2409.41	2300.56
B2RXM2;Q0VG47	B2RXM2;Q0VG47	Gm6793;Hnrnpa3	EG627828 protein;Heterogeneous nuclear ribonucleoprotein A3	10945	31773.6	28970.2	28883.3	25393	31090.9	32318.7	39744.3	46204.2
B2RXP1;B7ZWM8;E9Q892;E9QAU9;Q8BVU0	B2RXP1;B7ZWM8;E9Q892;E9QAU9;Q8BVU0	Lrch3	Leucine-rich repeats and calponin homology (CH) domain containing 3;Leucine-rich repeats and calponin homology (CH) domain containing 3;Leucine-rich repeats and calponin homology (CH) domain containing 3;Leucine-rich repeats and calponin homology (CH) domain containing 3;DISP complex protein LRCH3		17299.2	17992.1		5814.85	3733.71
B2RXQ2;B2RXW8;B8QI33	B2RXQ2;B2RXW8;B8QI33	Ppfia1	Ppfia1 protein;Ppfia1 protein;Liprin-alpha 1	24095	22079.7	19484.4	24816.3	31384.9	30009.4	18639.9	22120.6	21456.5
B2RXQ4;B2RXX0;B7ZWK0;P51954;Q3UXI0;Q69Z74	B2RXQ4;B2RXX0;B7ZWK0;P51954;Q3UXI0;Q69Z74	Nek1	NIMA (never in mitosis gene a)-related expressed kinase 1;NIMA (never in mitosis gene a)-related expressed kinase 1;NIMA (never in mitosis gene a)-related expressed kinase 1;Serine/threonine-protein kinase Nek1;Serine/threonine-protein kinase Nek1 (Fragment);MKIAA1901 protein (Fragment)	21226.2	22964.7	8176.25	21855.1	14651.8	14132	14409.9	20387.4	13859
B2RXR6;E9QNQ2	B2RXR6;E9QNQ2	Ankrd44	Serine/threonine-protein phosphatase 6 regulatory ankyrin repeat subunit B;Ankyrin repeat domain 44	9009.1	9721.84	6228.87	10390.1	13309.3	9242.75	6089.83	14167.3	2756.63
B2RXS3;F8VQ70;Q501L8;Q69ZJ3;Q8BIZ8;Q8BKW5;Q8BX16;Q8C0H1	B2RXS3;F8VQ70;Q501L8;Q69ZJ3;Q8BIZ8;Q8BKW5;Q8BX16;Q8C0H1	Scaper	S phase cyclin A-associated protein in the ER;S phase cyclin A-associated protein in the ER;Scaper protein (Fragment);MKIAA1454 protein (Fragment);S phase cyclin A-associated protein in the ER;U1-type domain-containing protein (Fragment);S phase cyclin A-associated protein in the endoplasmic reticulum N-terminal domain-containing protein (Fragment);S phase cyclin A-associated protein in the endop…
B2RXU3;Q8BH07	B2RXU3;Q8BH07	Arl6ip6	ADP-ribosylation factor-like 6 interacting protein 6;ADP-ribosylation factor-like protein 6-interacting protein 6	28958	35448	24290.7	25910.9	19956.2	24882.9	26602.4	24538.7	40139.5
B2RXV6;Q80T32	B2RXV6;Q80T32	Adgrd1	Adhesion G protein-coupled receptor D1;Adhesion G-protein coupled receptor D1	1315.19	1101.77	2650.58	2184.74	1448.13	827.579		3988.49	298.626
B2RXW1;P35492;Q8CE60	B2RXW1;P35492;Q8CE60	Hal	Histidine ammonia-lyase	129388	122836	119521	134744	121855	94662.7	98217.3	87880.1	86249.2
B2RXX9;B2RY26;Q91Z83	B2RXX9;B2RY26;Q91Z83	Myh7	Myosin, heavy polypeptide 7, cardiac muscle, beta;Myh7 protein;Myosin-7	2849911	3.67281e+06	2449520	639179	406336	611523	827063	535735	838521
B2RXZ9;Q8VCR8	B2RXZ9;Q8VCR8	Mylk2	Myosin light chain kinase 2, skeletal/cardiac muscle;Myosin light chain kinase 2, skeletal/cardiac muscle	105967	149705	123216	20399.4	12176.6	14645.6	50167.6	11237.7	23746.2
B2RY03;D3YVV9;E9Q1U2	B2RY03;D3YVV9;E9Q1U2	Synpo2	Synaptopodin 2	2.46107e+06	2.41782e+06	2.40492e+06	1.83035e+06	1.71786e+06	1.74115e+06	2.82065e+06	2418390	2.6314e+06
B2RY04	B2RY04	Dock5	Dedicator of cytokinesis protein 5	10724.5	4095.03	6186.71	6553.24	4650.75	5156.48	5277.6	6677.75	3665.29
B2RY11;B2RY21;E9Q876	B2RY11;B2RY21;E9Q876	Abca12	Abca12 protein;Abca12 protein;Glucosylceramide transporter ABCA12	2127.67	3867.9	3736.34	3895.1	2131.15	4257.91	102525
B2RY19;D3Z3H4;Q6AW69	B2RY19;D3Z3H4;Q6AW69	Cgnl1	Cgnl1 protein;Cingulin-like protein 1;Cingulin-like protein 1	15540.5	15076	19045	9084.65	8868.72	18263.7	12685.2	12443.5	17358
B2RY48;D3Z3E0;D3Z3E4;Q8BVE8	B2RY48;D3Z3E0;D3Z3E4;Q8BVE8	Nsd2	Whsc1 protein;Nuclear receptor binding SET domain protein 2;Nuclear receptor binding SET domain protein 2;Histone-lysine N-methyltransferase NSD2	7295.35	6235.54	1326.1	4411.53	5296.03	6416.09	10631.8	7227.6	7561.98
B2RY51;E9Q512;H3BJG4	B2RY51;E9Q512;H3BJG4	Trip11	Thyroid hormone receptor interactor 11;Thyroid hormone receptor interactor 11;Thyroid hormone receptor interactor 11 (Fragment)	3984.83	4361.01	3453.18	592.902			3322.34	1758.16
B2RY56	B2RY56	Rbm25	RNA-binding protein 25	32698.1	28898.9	38246.6	20522.8	24781.9	20590.1	22471.4	21785.8	20328.1
B2RY59;B7ZWP0;H3BJZ3;H3BK72;H3BLC3;H9H9T3;Q5NCX5	B2RY59;B7ZWP0;H3BJZ3;H3BK72;H3BLC3;H9H9T3;Q5NCX5	Neurl4	Neurl4 protein;Neurl4 protein;Neuralized E3 ubiquitin protein ligase 4;Neuralized E3 ubiquitin protein ligase 4;Neuralized E3 ubiquitin protein ligase 4 (Fragment);Neuralized E3 ubiquitin protein ligase 4 (Fragment);Neuralized-like protein 4	7813.13	4372.84	1788.44	4155.08	4678.78	5399.38	5630.5	2412.46	5629.99
B2RY70;Q9D486	B2RY70;Q9D486	Cmip	4933407C03Rik protein;C-Maf-inducing protein	9655.5	11027.9	10389.1	7024.78	6674.76	7344.62	6220.55	6138.47	9344.41
B2ZRS3;B2ZRS5;B2ZRS6;B2ZRS7;B2ZRS8;Q570Y9	B2ZRS3;B2ZRS5;B2ZRS6;B2ZRS7;B2ZRS8;Q570Y9	Deptor;Deptor;Depdc6;Deptor;Depdc6;Deptor	Depdc6-001;DEP domain containing MTOR-interacting protein;Depdc6-002;Depdc6-003;Depdc6-003;DEP domain-containing mTOR-interacting protein	14674.6	14899.7	15382.7	12553.2	14542.9	14339.6	9824.52	11395.5	12525.8
B3STQ4	B3STQ4	Strn3	Striatin-3 (Fragment)					1098.92	1127.19
B3VQI8;Q3TAM0;Q61462	B3VQI8;Q3TAM0;Q61462	Cyba	Cytochrome b-245 light chain	5049.27	4610.42	5058.85					780.119
B3Y5T0;P70174	B3Y5T0;P70174	Hrh1	Histamine H1 receptor				1296.42
B5B2N2;B5B2N4;B5B2N7;Q6P7T9	B5B2N2;B5B2N4;B5B2N7;Q6P7T9	Nfatc1	Nuclear factor of activated T cells, cytoplasmic, calcineurin dependent 1;Nuclear factor of activated T cells, cytoplasmic, calcineurin dependent 1;Nuclear factor of activated T cells, cytoplasmic, calcineurin dependent 1;Nuclear factor of activated T-cells c1 isoform IA-IXS	844.587	1265.17	717.74			321.384
B5B2P6;B5B2P7;B5B2Q2;Q60591	B5B2P6;B5B2P7;B5B2Q2;Q60591	Nfatc2	Nuclear factor of activated T-cells c2 isoform IA-IIL-Xa;Nuclear factor of activated T-cells c2 isoform IB-IIL-Xa;Nuclear factor of activated T-cells c2 isoform IA-IIL-deltaXa;Nuclear factor of activated T-cells, cytoplasmic 2	7202.54	10769.2	8933.17	11664.1	13238	14585.3	11113.2	14341.3	14487.4
B5B2U2;Q3UZ64	B5B2U2;Q3UZ64	Nfatc3	Nuclear factor of activated T cells, cytoplasmic, calcineurin dependent 3;Nuclear factor of activated T-cells c3 isoform IB-deltaXa	25206.9	1108.02	1192.24	1304.62	1308.17	1396.48	1504.24	2248.47	2899.93
B6YY24;Q3UVG3	B6YY24;Q3UVG3	Fam91a1	Skeletal muscle cells re-entry induced;Protein FAM91A1	190594	168975	170994	73043.6	80452.4	84937.2	68786.2	64489.1	62267.7
B6ZHC5;Q80UE4;Q80UE5	B6ZHC5;Q80UE4;Q80UE5	Epb41l2	Erythrocyte protein band 4.1-like 2;Epb4.1l2 protein;Epb4.1l2 protein	57089	54561.9	39957.7	32101.3	30362.3	38875.7	22924.2	23267.6	30425.8
B6ZHD0;O70318;Q3UNQ6;Q80UE3	B6ZHD0;O70318;Q3UNQ6;Q80UE3	Epb41l2	Erythrocyte protein band 4.1-like 2;Band 4.1-like protein 2;FERM domain-containing protein;Protein 4.1G	32960	29907.9	32651	34679.1	26363.8	28253.7	44525.3	36272.6	38613.6
B7FAU9;B7FAV1;B9EKP5;Q8BTM8	B7FAU9;B7FAV1;B9EKP5;Q8BTM8	Flna	Filamin, alpha;Filamin, alpha (Fragment);Filamin, alpha;Filamin-A	13305.5	11853.4	13035.7	8057.77	8060.06	7986.08	7460.57	8442.58	7174.11
B7STB7;P10107;Q3U5N9;Q4FJV4;Q4FK88	B7STB7;P10107;Q3U5N9;Q4FJV4;Q4FK88	Anxa1	Annexin;Annexin A1;Annexin;Annexin;Annexin	42778.6	46193.7	41861.7	21933.1	22601.3	20883	25613	26640.5	22390.3
B7U582;P17156	B7U582;P17156	;Hspa2	Heat shock protein 70-2;Heat shock-related 70 kDa protein 2			0.983326		4.20564			1.88378
B7ZC24	B7ZC24	Ncoa5	Nuclear receptor coactivator 5	25644	24472.2	26836	17262.5	17675.2	17173.1	23305.7	22947.5	17706.9
B7ZCR1	B7ZCR1	Uckl1	uridine/cytidine kinase (Fragment)	30754	22412.4	30154.8	18311	14422.9	14104.6	14753.6	14476.9	11238.3
B7ZCU0;B7ZCU2;B7ZCU3;B7ZCU4;B7ZCU5;J3QNK8;Q3TJ64;Q3TJR5;Q3TMI0;Q3TPY5;Q3UAH6;Q3UBL3;Q6AXD3;Q8CBW3	B7ZCU0;B7ZCU2;B7ZCU3;B7ZCU4;B7ZCU5;J3QNK8;Q3TJ64;Q3TJR5;Q3TMI0;Q3TPY5;Q3UAH6;Q3UBL3;Q6AXD3;Q8CBW3	Abi1;Abi1;Abi1;Abi1;Abi1;Abi1;Abi1;Abi1;Abi1;Abi1;Abi1;;Abi1;Abi1	Abl interactor 1;Abl interactor 1;Abl interactor 1;Abl interactor 1;Abl interactor 1;Abl interactor 1;Abl interactor 1;Abl interactor 1;Abl interactor 1;Abl interactor 1;Abl interactor 1;SH3 domain-containing protein;Abi1 protein;Abl interactor 1	25008.8	24427.1	21333.5	14281	15866.9	13477.1	17585.9	19610.6	18741.8
B7ZCV4;B9EID1;D6RJJ8;Q8BGB8;Q8BLS2	B7ZCV4;B9EID1;D6RJJ8;Q8BGB8;Q8BLS2	Coq4	Coenzyme Q4 (Fragment);Ubiquinone biosynthesis protein COQ4 homolog, mitochondrial;Coenzyme Q4;Ubiquinone biosynthesis protein COQ4 homolog, mitochondrial;Ubiquinone biosynthesis protein COQ4 homolog, mitochondrial			15045.1
B7ZMR0;Q76LS9	B7ZMR0;Q76LS9	Mindy1	Ubiquitin carboxyl-terminal hydrolase;Ubiquitin carboxyl-terminal hydrolase MINDY-1	64918.7	70106	16953.9	24164.6	28747.4	25353.2	20218.3	21227.2	23193.8
B7ZMR9;D3YV79;Q0VEE6	B7ZMR9;D3YV79;Q0VEE6	Zfp800;Zfp800;Znf800	Zinc finger protein 800;Zinc finger protein 800 (Fragment);Zinc finger protein 800	5511.15	4215.14	4562.95	2751.84	1672.56	1342.97	1478.15		681.905
B7ZMU2;E9QJT6;F8WI26;Q68ED3	B7ZMU2;E9QJT6;F8WI26;Q68ED3	Tent4b	Papd5 protein;Terminal nucleotidyltransferase 4B;Terminal nucleotidyltransferase 4B;Terminal nucleotidyltransferase 4B	502.501	341.413	299.359	263.238	599.064	651.664
B7ZMV2;Q9CYS6	B7ZMV2;Q9CYS6	2810459M11Rik;	Uncharacterized protein;Uncharacterized protein C2orf72 homolog
B7ZMW6;Q2VLH6	B7ZMW6;Q2VLH6	Cd163	Cd163 protein;Scavenger receptor cysteine-rich type 1 protein M130	9644.28	8097.66	12840.1	108.705	3903.93	1903.02	7311.06	7029.78	5816.81
B7ZN02;Q5DTX6	B7ZN02;Q5DTX6	Jcad	Junctional protein associated with coronary artery disease;Junctional cadherin 5-associated protein	5626.9	8748.76	9526.44	4490.34	4675.04	4141.56	6809.81	7051.65	5450.15
B7ZN04;E9PUU4;Q3TR97	B7ZN04;E9PUU4;Q3TR97	Gemin5	Gemin5 protein;Gem nuclear organelle associated protein 5;Uncharacterized protein (Fragment)	4907.97	5210.66	6771.83	12842.7	9925.05	13425.4	10476.3	8386.78	11705.3
B7ZN13;P47739;Q3UNF5	B7ZN13;P47739;Q3UNF5	Aldh3a1	Aldehyde dehydrogenase;Aldehyde dehydrogenase, dimeric NADP-preferring;Aldehyde dehydrogenase	22154.7	18122.6	20566.3	10923.5	8844.31	9401.53	8572.57	9428.82	11265.2
B7ZN33;Q80TM9	B7ZN33;Q80TM9	Nisch	Nisch protein (Fragment);Nischarin	12879.1	12788.7	13553.6	6520.18	6033.52	6725.35	1304.02	1205.66	893.935
B7ZNA5;D3YY34;E9QPT4;Q8CHP6	B7ZNA5;D3YY34;E9QPT4;Q8CHP6	Phc3	Phc3 protein;Polyhomeotic 3;Polyhomeotic 3;Polyhomeotic-like protein 3	26970.3	26434.4	21401.4	21017.5	23672.6	22792.8	24244.9	24542.8	30027.4
B7ZND8;Q9CSQ7;Q9D845;V9GWX9;V9GX10;V9GX60;V9GXL5;V9GXN9;Z4YJY6	B7ZND8;Q9CSQ7;Q9D845;V9GWX9;V9GX10;V9GX60;V9GXL5;V9GXN9;Z4YJY6	Tex9	Testis expressed gene 9;Testis-expressed protein 9 (Fragment);Testis-expressed protein 9;Testis expressed gene 9 (Fragment);Testis expressed gene 9 (Fragment);Testis expressed gene 9;Testis expressed gene 9;Testis expressed gene 9;Testis expressed gene 9
B7ZNF6;E9QKH8;O35927	B7ZNF6;E9QKH8;O35927	Ctnnd2	Catenin (cadherin associated protein), delta 2;Catenin (cadherin associated protein), delta 2;Catenin delta-2	124.6			707.675				412.03
B7ZNF8;Q8BYH8	B7ZNF8;Q8BYH8	Chd9	DNA helicase;Chromodomain-helicase-DNA-binding protein 9	10334.9	10358.6	12933.2	13322	12268.2	11634.5	10627.2	10588.3	10552.1
B7ZNG0;J3QNW9	B7ZNG0;J3QNW9	Kif7	Kinesin-like protein KIF7;Kinesin family member 7	3873.25	3610.68	4041.99	16987.1	16549.8	13041.5	10991.6	7862.71	7212.49
B7ZNG4	B7ZNG4	Troap	Tastin				341.742		629.265			3023.36
B7ZNH7;K3W4R4;Q80X19	B7ZNH7;K3W4R4;Q80X19	Col14a1	Collagen, type XIV, alpha 1;Collagen, type XIV, alpha 1;Collagen alpha-1(XIV) chain	89804.8	88711.5	89743.6	40978.9	48870.3	49077	30813.5	29263.1	31375.7
B7ZNI7;Q8K558	B7ZNI7;Q8K558	Treml1	Treml1 protein;Trem-like transcript 1 protein	11965.5	11134.8	7807.1	3545.68	3278.93	2716.06	7975.91	8582.78	8436.26
B7ZNL3	B7ZNL3	Tpm1	Tpm1 protein	4306.54	4975.8	5628.33	3772.92	2891.36	2767.3	751.478	1860.87	981.077
B7ZNL9;F8VQE6;Q3U179;Q3UJK8;Q571H2	B7ZNL9;F8VQE6;Q3U179;Q3UJK8;Q571H2	Tatdn2	TatD DNase domain containing 2;TatD DNase domain containing 2;Deoxyribonuclease TATDN2;Deoxyribonuclease TATDN2 (Fragment);MKIAA0218 protein (Fragment)	7602.24	11411.2	10687.9	4742.8	4755.46	3413.64	4511.16	3842.34	5167.57
B7ZNS9;P03953;Q3UP47	B7ZNS9;P03953;Q3UP47	Cfd	Cfd protein;Complement factor D;Complement factor D (Adipsin)	1321.53	270.034	725.952	489.799	392.316		663.959	640.677
B7ZNU9;Q3V2N5;Q542S9;Q61235	B7ZNU9;Q3V2N5;Q542S9;Q61235	Sntb2	Sntb2 protein;Beta-2-syntrophin;Syntrophin, basic 2;Beta-2-syntrophin	1.22674e+06	1.25139e+06	1.20278e+06	554291	665326	610667	842344	863824	749005
B7ZNX0;Q9ESC8	B7ZNX0;Q9ESC8	Aff4	Aff4 protein;AF4/FMR2 family member 4	11865.5	19130.5	20064	14953	7658.74	8847.63	8191.61	5734.02	11165.2
B7ZNX9;B9EK94;E9QKY4;E9QLU9;Q571N6;Q80UZ0	B7ZNX9;B9EK94;E9QKY4;E9QLU9;Q571N6;Q80UZ0	Fgd5	Fgd5 protein;FYVE, RhoGEF and PH domain containing 5;FYVE, RhoGEF and PH domain containing 5;FYVE, RhoGEF and PH domain containing 5;MFLJ00274 protein (Fragment);FYVE, RhoGEF and PH domain-containing protein 5	8669.6	6402.76	7755.86	6529.39	6356.31	3961.11	6370.72	9579.45	5815.68
B7ZNY3	B7ZNY3	Pard3	Par-3 family cell polarity regulator	5766.05	7149.39	5448.59	6079.61	4347.7	8335.17	6912.06	5769.34	4889.96
B7ZP47;Q65Z40	B7ZP47;Q65Z40	Wapl	WAPL cohesin release factor;Wings apart-like protein homolog				4450.35	15639.2	9548.77	3406.98	7129.39	6757.47
B7ZW98;D3YTV8;G5E8J2	B7ZW98;D3YTV8;G5E8J2	Ank1	Ank1 protein;Ankyrin 1, erythroid;Ankyrin 1, erythroid	8865.91	10364.7	10780.7	3730.21	7657.7	4098.09		12595.8	9962.72
B7ZWA9;O88939	B7ZWA9;O88939	Zbtb7a	Zbtb7a protein;Zinc finger and BTB domain-containing protein 7A	1145.13	737.976	437.214		379.061		480.531		521.573
B7ZWC0;Q3TD08;Q3TSR4;Q545R3;Q62433	B7ZWC0;Q3TD08;Q3TSR4;Q545R3;Q62433	Ndrg1	N-myc downstream regulated gene 1;Uncharacterized protein;Uncharacterized protein;N-myc downstream regulated gene 1;Protein NDRG1	51539.1	62614.5	66354.9	111593	106713	114849	97124.3	90474.8	95326.5
B7ZWC4;Q07113;Q7TMR1;Q80VF2;Q8C2F9;Q8C6V9;Q8K0J1	B7ZWC4;Q07113;Q7TMR1;Q80VF2;Q8C2F9;Q8C6V9;Q8K0J1	Igf2r	Insulin-like growth factor 2 receptor;Cation-independent mannose-6-phosphate receptor;Igf2r protein (Fragment);Igf2r protein (Fragment);Uncharacterized protein (Fragment);Uncharacterized protein (Fragment);Igf2r protein (Fragment)	10885.6	12228.2	18631.1	27890	30450.6	34280.5	17578.3	14784.5	15421
B7ZWF1;B9EKE9;Q3TQX5;Q62167	B7ZWF1;B9EKE9;Q3TQX5;Q62167	Ddx3x	RNA helicase;RNA helicase;RNA helicase;ATP-dependent RNA helicase DDX3X	2938.61	2631.7	3153.27	2986.9	2438.67	3298.33	3058.1	2762.72	2381.03
B7ZWK9;Q3UHH1	B7ZWK9;Q3UHH1	Zswim8	2310021P13Rik protein;Zinc finger SWIM domain-containing protein 8	1500.97	3016.53	4993.02	3880.24	4290.24	3460.17	2332.45	2450.71	3154.83
B7ZWN1;Q80WE4	B7ZWN1;Q80WE4	Kif20b	Kif20b protein;Kinesin-like protein KIF20B	3868.64	4524.76	3130.56	3589.18	3495.31	3325.07	4711.14	3560.7	3516.84
B7ZWN9;F6Z9A1;H3BJS8;H3BK20;Q6P7W0	B7ZWN9;F6Z9A1;H3BJS8;H3BK20;Q6P7W0	Senp6	Senp6 protein;SUMO/sentrin specific peptidase 6;SUMO/sentrin specific peptidase 6 (Fragment);SUMO/sentrin specific peptidase 6 (Fragment);Sentrin-specific protease 6	1788.24
B8JJA2;E0CXX6;E0CYJ7;F7BJW2;F7BQ76;Q3TV65	B8JJA2;E0CXX6;E0CYJ7;F7BJW2;F7BQ76;Q3TV65	Mpnd	MPN domain containing (Fragment);MPN domain containing;MPN domain containing;MPN domain containing (Fragment);MPN domain containing (Fragment);MPN domain-containing protein		490.957	897.17	399.128	1490.55	898.63	1218.22
B8JJC1;Q8BJ37	B8JJC1;Q8BJ37	Tdp1	Tyrosyl-DNA phosphodiesterase 1	955.437			2587.88	2170.09	1221.67	2146.82		3156.22
B8JJC2;Q3TX72;Q4FJN2;Q64378	B8JJC2;Q3TX72;Q4FJN2;Q64378	Fkbp5	peptidylprolyl isomerase (Fragment);peptidylprolyl isomerase;peptidylprolyl isomerase;Peptidyl-prolyl cis-trans isomerase FKBP5	6063.26	7178.34	5047.02		477.911	1926.06	2014.68		1131.23
B8JJF6;Q9Z2D1	B8JJF6;Q9Z2D1	Mtmr2	Myotubularin related protein 2;Myotubularin-related protein 2	1295.61	911.717	3406.19	3079.36	3427.44	4096.4	2958.87	1856.69	2088.55
B8JJI7;H3BL83;Q3UHU5	B8JJI7;H3BL83;Q3UHU5	Mtcl1	Microtubule crosslinking factor 1 (Fragment);Microtubule crosslinking factor 1;Microtubule cross-linking factor 1		2335.2	2111.34	4633.52	2829.33	2088.78		1519.07
B8JJM5;B8JJN0;P04186;Q3UEG8	B8JJM5;B8JJN0;P04186;Q3UEG8	Cfb;Gm20547;Cfb;Cfb	C3/C5 convertase;Complement C2;Complement factor B;C3/C5 convertase	8173.36	4652.47	5647.9	2450.17	5146.53	2041.62	4113.5	3457.36	3018.4
B8JK81;B8JK87;Q8K371	B8JK81;B8JK87;Q8K371	Amotl2	Angiomotin-like 2 (Fragment);Angiomotin-like 2;Angiomotin-like protein 2	7952.08	5247.55	9977.02	9485.82	7605.54	3366.62	4262.49	10473.5	5250.38
B8X349;Q58A65	B8X349;Q58A65	Spag9	JNK-interacting leucine zipper protein long form;C-Jun-amino-terminal kinase-interacting protein 4	98755.7	113267	111613	166671	194544	184229	151834	142687	136754
B9EHC7;F6QYE1;O09161	B9EHC7;F6QYE1;O09161	Casq2	Calsequestrin;Calsequestrin;Calsequestrin-2	2573.82	3427.01	2246.99		365.108		1823.91	725.976	1437.05
B9EHD0;Q8K1T1	B9EHD0;Q8K1T1	Lrrc25	Leucine rich repeat containing 25;Leucine-rich repeat-containing protein 25	20507.8	23710.8	19494.2	29312.1	21668	23347.8	16407.7	11545.3	12691.2
B9EHE8;E9Q9Q2	B9EHE8;E9Q9Q2	R3hdm1	R3hdm1 protein;R3H domain containing 1	8381.52	26061.3	7825.27	5267.61	4687.54	4287.33	9866.49	5566.59	7936.05
B9EHJ9;P33609;Q8CAT7	B9EHJ9;P33609;Q8CAT7	Pola1	DNA polymerase alpha catalytic subunit;DNA polymerase alpha catalytic subunit;DNA polymerase alpha catalytic subunit N-terminal domain-containing protein (Fragment)	3651.61	6295.76	5060.17	12076.6	11251	10829	3795	5076.99	5556.06
B9EHN0;Q02053	B9EHN0;Q02053	Uba1	E1 ubiquitin-activating enzyme;Ubiquitin-like modifier-activating enzyme 1	133389	152632	131686	115079	125884	127762	100917	106136	93934.8
B9EHX4;Q62388	B9EHX4;Q62388	Atm	Serine-protein kinase ATM	12690.5	11917.4	11702.2	2428.3		2033.84		1605.76	1600.59
[truncated: 3,435 more rows]

## Sheet: total phosphorylation site
PG.ProteinAccessions	PG.Genes	PG.ProteinDescriptions	PG.ProteinNames	PTM.ProteinId	PTM.CollapseKey	PTM.Multiplicity	PTM.ModificationTitle	PTM.SiteAA	PTM.SiteLocation	PTM.FlankingRegion	CONT1.PTM.SiteProbability	CONT2.PTM.SiteProbability	CONT3.PTM.SiteProbability	SCT1.PTM.SiteProbability	SCT2.PTM.SiteProbability	SCT3.PTM.SiteProbability	CONX1.PTM.Quantity	CONX2.PTM.Quantity	CONX3.PTM.Quantity
[truncated: 59,295 more rows]
