# Supplementary material for: The human umbilical cord–mesenchymal stem cell secretome regulates hair growth and cycle transition by promoting methylthioadenosine synthesis via the PI3K/AKT/mTOR pathway
Source: Research Square preprint supplement (doi:10.21203/rs.3.rs-7150416/v1), 2025-08-07
Supplement: Supplementary file 2 [file 715688c488e3f6fca67bef0f.xlsx]

## Sheet: Metabo_POS
MetaboName	Alignment ID	KEGGID	HMDBID	SuperClass	Class	SubClass	RT(min)	m/z	Adduct type	Formula	Ontology	SCT1	SCT2	SCT3	QC1	QC2	QC3	QC4
Zonisamide	P3437	C07504	HMDB0015045	Organoheterocyclic compounds	Benzisoxazoles	---	1.343	213.036	[M+Na]+	C8H8N2O3S		1.65591e+08	1.88384e+08	1.4152e+08	8.93777e+07	1.12653e+08	106834186	1.02955e+08
Yangonin	P5017	C09980	HMDB0034144	Phenylpropanoids and polyketides	Kavalactones	---	1.433	281.066	[M+H]+	C15H14O4	Kavalactones	9.19424e+08	1090600683	9.71744e+08	8.90115e+08	1143064465	1079827051	1037668776
Xylose	P2384	C01394	HMDB0000098	Organic oxygen compounds	Organooxygen compounds	Carbohydrates and carbohydrate conjugates	1.34	173.041	[M+H-H2O]+	C5H10O5	Pentoses	1929014712	2166871497	1775738877	1405046999	1429089517	1423078887	1419071801
Xanthotoxol	P3754	C00841	HMDB0029457	Phenylpropanoids and polyketides	Coumarins and derivatives	Furanocoumarins	1.431	225.009	[M+H]+	C11H6O4	8-hydroxypsoralens	0	0	4.293e+06	2.21461e+06	3.38523e+06	3.09258e+06	2.89748e+06
Xanthomonic Acid	P7915		---	---	---	---	8.793	468.308	[M+K]+	C29H41NO4	Diterpenoids	9.09774e+07	1.45881e+08	1.53205e+08	3.90124e+08	3.66689e+08	3.72547e+08	3.76453e+08
Voriconazole	P6368	C07622	HMDB0014720	Benzenoids	Benzene and substituted derivatives	Phenylpropanes	5.096	350.12	[M+Na]+	C16H14F3N5O	Phenylpropanes	2673298679	1717600483	1771068379	5689427404	4950630088	5135329417	5258462303
Vitamin K1	P7963	C02059	HMDB0003555	Lipids and lipid-like molecules	Prenol lipids	Quinone and hydroquinone lipids	10.959	473.343	[M+Na]+	C31H46O2	Vitamin K compounds	2.13236e+07	1.73798e+07	2.15664e+07	2.92546e+07	2.89127e+07	2.89982e+07	2.90551e+07
Vitamin B12	P10444	C05776	HMDB0002174	Organoheterocyclic compounds	Tetrapyrroles and derivatives	Corrinoids	5.208	678.291	[M+2H]2+	C63H88CoN14O14P	Cobalamin derivatives	4.40275e+08	4.82785e+08	3.42785e+08	4.06635e+08	233125902	2.76503e+08	3.05421e+08
Vinyl Carbamate	P212		HMDB0259822	Organic acids and derivatives	Carboxylic acids and derivatives	Amino acids, peptides, and analogues	5.795	88.0397	[M+H]+	C3H5NO2	Carbamate esters	1327192189	6.21666e+08	7.17284e+08	5.8121e+08	4.31454e+08	4.68893e+08	4.93853e+08
Verruculotoxin	P5065	C10624	---	---	---	---	4.996	283.122	[M+K]+	C15H20N2O	Alpha amino acid amides	2.51296e+08	2.59858e+08	2.54466e+08	1.90591e+08	2.32779e+08	2.22232e+08	2.15201e+08
Veratramine	P7500	C10829	HMDB0259781	Benzenoids	Fluorenes	---	5.579	432.279	[M+NH4]+	C27H39NO2	Fluorenes	7.32038e+07	7.26291e+07	4.34804e+07	6.47911e+07	3.29543e+07	4.09135e+07	4.62196e+07
Valine	P936	C16436	HMDB0000883	Organic acids and derivatives	Carboxylic acids and derivatives	Amino acids, peptides, and analogues	1.974	118.086	[M+H]+	C5H11NO2	Valine and derivatives	71193877192	69141450012	73082248614	54105300257	61794512395	59872209360	58590674004
Tyrosine	P2631	C01536	HMDB0000158	Organic acids and derivatives	Carboxylic acids and derivatives	Amino acids, peptides, and analogues	3.854	182.081	[M+H]+	C9H11NO3	Tyrosine and derivatives	138000000000	126000000000	146000000000	159000000000	151000000000	153000000000	155000000000
Tsitsikammamine B	P5822		---	---	---	---	2.818	318.119	[M+H]+	[C19H16N3O2]+	Pyrrolo[4,3,2-de]quinolines	1.05907e+08	1.41832e+08	5.87404e+07	1916155925	7.36848e+08	1031675077	1228226377
Tryptophol	P1642	C00955	HMDB0003447	Organoheterocyclic compounds	Indoles and derivatives	Indoles	5.279	144.08	[M+H-H2O]+	C10H11NO	Indole and derivatives	1900163592	1806299343	1084497107	1967677997	1424808682	1560526011	1651004230
Tris(1-Chloro-2-Propyl)Phosphate	P5971		---	---	---	---	8.693	327.006	[M+H]+	C9H18Cl3O4P	Trialkyl phosphates	3.28628e+07	4.81354e+07	5.21394e+07	5.29688e+07	6.02931e+07	5.8462e+07	5.72413e+07
Triphenylphosphate	P5974	C14235	HMDB0259262	Organic acids and derivatives	Organic phosphoric acids and derivatives	Phosphate esters	5.959	327.078	[M+Na]+	C18H15O4P	Aryl phosphotriesters	3.24731e+07	6.8361e+07	1.68871e+08	4.31445e+07	6.90678e+07	6.2587e+07	5.82665e+07
Trigonelline	P1434	C01004	HMDB0000875	Alkaloids and derivatives	---	---	1.401	138.052	[M+H]+	C7H7NO2	Alkaloids and derivatives	6123925718	7539466206	6408870698	4115660105	4517735802	4417216877	4350204261
Triacetin	P3593	D00384	HMDB0029592	Lipids and lipid-like molecules	Glycerolipids	Triradylcglycerols	6.46	218.211	[M+H]+	C9H14O6	Triacylglycerols	5.60153e+08	2.55918e+08	2.96302e+08	5.14228e+08	3.76701e+08	4.11083e+08	4.34004e+08
Tranilast	P5988		---	---	---	---	6.599	328.114	[M+Na]+	C18H17NO5	N-cinnamoylanthranilic acids	5.72862e+07	6.98177e+06	5.00229e+07	4.56804e+06	5.04706e+06	4.9273e+06	4.84747e+06
Tracheloside	P9288		HMDB0030557	Lignans, neolignans and related compounds	Lignan glycosides	---	8.301	573.194	[M+Na]+	C27H34O12	Lignan glycosides	1.2629e+07	1.9034e+07	2.03201e+07	3.67223e+07	6.43974e+07	5.74787e+07	5.28661e+07
Tolterodine	P5962	C07750	HMDB0015170	Benzenoids	Benzene and substituted derivatives	Diphenylmethanes	6.692	326.252	[M+NH4]+	C22H31NO		1.77579e+06	439515	966432	5.61827e+07	4.27856e+07	4.61349e+07	4.83677e+07
Toddalolactone	P5626		---	---	---	---	1.587	309.128	[M+H]+	C16H20O6	Coumarins and derivatives	5.54543e+08	4.72469e+08	6.0817e+08	1962170152	2172641166	2120023413	2084944910
Tobramycin	P8121	C00397	HMDB0014822	Organic oxygen compounds	Organooxygen compounds	Carbohydrates and carbohydrate conjugates	10.787	485.287	[M+NH4]2+	C18H37N5O9	4,6-disubstituted 2-deoxystreptamines	9.8419e+08	570801119	8.11889e+08	8.15449e+08	8.31926e+08	8.27807e+08	8.25061e+08
Tigogenin	P7323	C08914	HMDB0030048	Lipids and lipid-like molecules	Prenol lipids	Triterpenoids	10.18	417.334	[M+H]+	C27H44O3	Triterpenoids	5.20469e+07	2.42977e+07	2.39718e+07	2.15048e+07	1.59747e+07	1.73572e+07	1.82789e+07
Thiamine	P4653	C00378	HMDB0000235	Organoheterocyclic compounds	Diazines	Pyrimidines and pyrimidine derivatives	1.529	265.111	[M]+	C12H17N4OS	Thiamines	12177399201	13702349734	12939716648	15882661710	16624710221	16439198093	16315523342
Thermopsine	P4698		---	---	---	---	4.991	267.145	[M+Na]+	C15H20N2O	Anagyrine-type alkaloids	1067979285	9.82319e+08	856521207	4.41159e+08	553142887	5.25147e+08	5.06483e+08
Theophylline	P3209	C07130	HMDB0001889	Organoheterocyclic compounds	Imidazopyrimidines	Purines and purine derivatives	1.348	203.052	[M+Na]+	C7H8N4O2	Xanthines	57981126468	84872905489	55607503308	39645657382	44909041245	43593195279	42715964636
Theobromine	P3210	C07480	HMDB0002825	Organoheterocyclic compounds	Imidazopyrimidines	Purines and purine derivatives	2.415	203.052	[M+Na]+	C7H8N4O2	Xanthines	1534999075	4.39322e+08	1025857069	2204549180	1996069950	2048189758	2082936296
Terbumeton	P3795	C18768	---	---	---	---	10.534	226.158	[M+H]+	C10H19N5O	1,3,5-triazine-2,4-diamines	3.64189e+08	315884980	467289744	803022973	6.78047e+08	709291065	7.3012e+08
Tanshinone IIA	P5797		HMDB0258715	Lipids and lipid-like molecules	Prenol lipids	Diterpenoids	3.159	317.115	[M+H]+	C19H18O3	Tanshinones, isotanshinones, and derivatives	7.28255e+07	3.70647e+07	1.87087e+06	7.48836e+07	1.25765e+07	2.81533e+07	3.85378e+07
Sumatriptan Succinate	P5354		HMDB0005037	Organoheterocyclic compounds	Indoles and derivatives	Tryptamines and derivatives	9.678	296.146	[M+2H]2+	C18H27N3O6S		1.29225e+06	3.06648e+06	5.30558e+06	3.36072e+06	7.51654e+06	6.47759e+06	5.78495e+06
Stearoyl Ethanolamide	P6001		HMDB0013078	Organic nitrogen compounds	Organonitrogen compounds	Amines	12.02	328.32	[M+NH4]+	C20H41NO2	N-acylethanolamines	1.75991e+07	1.84177e+07	2.05724e+07	2.09813e+07	2.20917e+07	2.18141e+07	21629043
Sphinganine Related Molecules	P5504		---	---	---	---	8.451	302.305	[M+H]+			3971721562	3508058239	3757531958	5882244901	6157766601	6088886176	6042965892
Spermidine	P1698	C00315	HMDB0001257	Organic nitrogen compounds	Organonitrogen compounds	Amines	1.091	146.165	[M+H]+	C7H19N3	Dialkylamines	6.15427e+06	8.23332e+06	3.0366e+06	2.46821e+08	2.82627e+08	2.73676e+08	2.67708e+08
Sophoridine	P4791		---	---	---	---	5.334	271.164	[M+Na]+	C15H24N2O	Matrine alkaloids	9.86928e+08	696649880	4.30406e+08	7.22301e+07	4.90615e+07	5.48537e+07	5.87151e+07
Solasodiene	P7046		HMDB0302982	Lipids and lipid-like molecules	Steroids and steroid derivatives	Steroidal alkaloids	10.017	396.33	[M+H]+	C27H41NO	Steroidal saponins	1.08149e+08	1.02569e+08	1.03873e+08	2.59781e+08	2.02811e+08	2.17054e+08	2.26549e+08
Smenospongine	P4598		---	---	---	---	2.426	262.984	[M+H]+	C21H29NO3	Prenylquinones	1.2811e+08	3.20983e+07	6.48342e+06	3.60446e+08	3.65814e+07	1.17547e+08	1.71525e+08
Smenospongidine	P5653		---	---	---	---	12.584	310.309	[M+NH4]+	C29H37NO3		2.00118e+08	1.89221e+08	3.66056e+08	1379719312	1316986559	1332669747	1343125206
Smenospongiarine	P7285		---	---	---	---	8.239	414.299	[M+H-2H2O]+	C26H39NO3	Prenylquinones	73866030	8.49291e+07	8.39503e+07	1.20123e+08	112162143	1.14152e+08	1.15479e+08
Shogaol	P5750	C10494	HMDB0137236	Benzenoids	Phenols	Methoxyphenols	6.095	315.133	[M+H]+	C17H24O3	Shogaols	4.82612e+07	4.69287e+07	4.24878e+07	1.876e+07	1.2501e+07	1.40658e+07	1.51089e+07
Shikimic Acid	P3037	C00493	HMDB0003070	Organic oxygen compounds	Organooxygen compounds	Alcohols and polyols	1.342	197.042	[M+H-H2O]+	C7H10O5	Shikimic acids and derivatves	1.78544e+08	1.91748e+08	1.84836e+08	1.24454e+08	1.24946e+08	1.24823e+08	124741385
Secopenitrem D	P9256		---	---	---	---	9.52	570.354	[M+H]+	C37H47NO4	Naphthopyrans	8.04408e+06	1.24038e+07	1.46081e+07	3.97874e+08	3.37941e+08	3.52925e+08	362913350
Salicyclic Acid	P2077		---	---	---	---	4.817	161.018	[M+H]+	C7H6O3	Salicylic acids	2.62334e+08	3.09741e+08	3.17738e+08	137938832	2.03874e+08	1.8739e+08	1.76401e+08
Salicin	P5622	C01451	HMDB0003546	Organic oxygen compounds	Organooxygen compounds	Carbohydrates and carbohydrate conjugates	5.466	309.09	[M+Na]+	C13H18O7	Phenolic glycosides	1.70754e+06	2.9738e+06	555848	4.39558e+07	2.49113e+07	2.96724e+07	3.28465e+07
S-Adenosyl-L-homocysteine	P6896	C00021	HMDB0000939	Nucleosides, nucleotides, and analogues	5'-deoxyribonucleosides	5'-deoxy-5'-thionucleosides	4.99	385.128	[M+H]+	C14H20N6O5S	5'-deoxy-5'-thionucleosides	734325	2.12901e+06	815327	2.5402e+07	3.57448e+07	3.31591e+07	3.14353e+07
Roxithromycin	P7343	C13173	HMDB0014916	Benzenoids	Benzene and substituted derivatives	---	10.618	419.276	[M+Na]+	C41H76N2O15	Aminoglycosides	3.08292e+07	1.32548e+07	2.0216e+07	1.68657e+07	9.69761e+06	1.14896e+07	1.26843e+07
Rofecoxib	P5745	C07590	---	---	---	---	1.4	315.066	[M+ACN+H]+	C17H14O4S	Stilbenes	1.33846e+08	1.46091e+08	1.79273e+07	1.97775e+08	2.18755e+08	2.1351e+08	2.10013e+08
Roemerine	P5487		HMDB0030264	Organoheterocyclic compounds	Heteroaromatic compounds	---	2.347	302.119	[M+H]+	C18H17NO2	Aporphines	1226018628	1320262272	2571499253	3140020967	6280614383	5495466029	4972033793
Robustic Acid	P6846		---	---	---	---	1.394	381.134	[2M+H]+	C22H20O6	Hydroxyisoflavonoids	1.5829e+07	1.62813e+07	2.31942e+07	2.70574e+07	3.29386e+07	3.14683e+07	3.04881e+07
Ricinine	P2168	C01526	HMDB0042006	Organoheterocyclic compounds	Pyridines and derivatives	3-pyridinecarbonitriles	1.353	165.063	[M+NH4]+	C8H8N2O2	3-pyridinecarbonitriles	2.94623e+08	437336241	2.88274e+08	1.72494e+08	1.82548e+08	1.80035e+08	1.78359e+08
Riboflavin	P7088	C00255	HMDB0000244	Organoheterocyclic compounds	Pteridines and derivatives	Alloxazines and isoalloxazines	5.533	399.127	[M+Na]+	C17H20N4O6	Flavins	7.43388e+07	7.11504e+07	4.85383e+07	1.40089e+08	214121252	1.95613e+08	1.83274e+08
Rhizocarpic Acid	P8206		---	---	---	---	5.144	492.14	[M+H]+	C28H23NO6	Phenylalanine and derivatives	2.35888e+07	1.91277e+07	1.13568e+07	6.14219e+07	4.77951e+07	5.12018e+07	5.34729e+07
Resveratrol	P4682	C03582	HMDB0003747	Phenylpropanoids and polyketides	Stilbenes	---	5.748	267.042	[M+Na]+	C14H12O3	Stilbenes	2.15058e+08	1.53936e+08	8.57874e+07	8.94463e+07	4.8887e+07	5.90268e+07	6.57867e+07
Reserpic Acid	P7120		---	---	---	---	7.185	401.213	[M+H]+	C22H28N2O5	Corynanthean-type alkaloids	1.94139e+06	1.2949e+06	2.74274e+06	7.69333e+06	9.72647e+06	9.21818e+06	8.87933e+06
Remerine	P4993		HMDB0030264	Organoheterocyclic compounds	Heteroaromatic compounds	---	2.377	280.138	[M+H]+	C18H17NO2	Alkaloids	12684428149	11888573216	12598121264	32926218452	37865641922	36630786054	35807548809
Reboxetine Mesylate Hydrate	P5734		---	---	---	---	5.437	314.182	[M+H]+	C20H29NO7S		1.53494e+07	9.35302e+06	8.70832e+06	2.04143e+07	1.15635e+07	1.37762e+07	1.52513e+07
Quinolin-2,8-diol	P2100	C06342	HMDB0240311	Organoheterocyclic compounds	Quinolines and derivatives	Quinolones and derivatives	5.029	162.058	[M+H-2H2O]+	C9H7NO2	Quinolones and derivatives	1.96203e+07	1.95523e+07	2.4435e+07	1.08454e+08	1.25433e+08	1.21188e+08	118358227
Quercetin	P5512	C00389	HMDB0005794	Phenylpropanoids and polyketides	Flavonoids	Flavones	1.423	303.056	[M+H]+	C15H10O7	Flavonols	2.80627e+08	4.00773e+08	3.21858e+08	5.04436e+07	5.53029e+07	5.40881e+07	5.32782e+07
Pyroglutamylisoleucine	P4173		---	---	---	---	5.786	243.133	[M+H]+	C11H18N2O4	Dipeptides	6.18587e+07	6.14741e+07	6.00793e+07	4.90874e+07	2.2139e+07	2.88761e+07	3.33675e+07
Pyrogallin	P3245		---	---	---	---	1.155	204.957	[M+Na]+	C11H8O4	Tropolones	4.31694e+07	4.74544e+07	3.42e+07	4.99398e+07	4.91136e+07	4.93201e+07	49457823
Pyrimidine	P82	C00396	HMDB0003361	Organoheterocyclic compounds	Diazines	Pyrimidines and pyrimidine derivatives	13.121	81.0452	[M+H]+	C4H4N2		6.90969e+08	5.70063e+08	6.34198e+08	1.40903e+08	4.08878e+08	3.41884e+08	297221684
Pyridoxamine	P2273	C00534	HMDB0001431	Organoheterocyclic compounds	Pyridines and derivatives	Pyridoxamines	1.153	169.094	[M+H]+	C8H12N2O2	Pyridoxamine 5'-phosphates	2.6542e+08	2.73238e+08	2.27098e+08	2.07145e+08	2.24531e+08	2.20185e+08	2.17287e+08
Pyridine	P63	C00747	HMDB0000926	Organoheterocyclic compounds	Pyridines and derivatives	---	2.623	80.0501	[M+H]+	C5H5N	Pyridines and derivatives	8.39228e+08	8.07872e+08	8.22285e+08	7.2896e+08	4.3054e+08	5.05145e+08	5.54881e+08
Puwainaphycin C	P9825		---	---	---	---	7.775	614.347	[M+H]+	C56H95ClN12O16	Macrolactams	249684	0	0	8.68312e+06	9.13743e+06	9.02385e+06	8.94813e+06
Purines I-IV gallate	P9049		---	---	---	---	11.81	554.174	[M+H]+	C28H27NO11		8.03295e+06	4.84948e+06	7.49788e+06	1.07298e+07	1.57712e+07	1.45108e+07	1.36706e+07
P-Toluenesulfonamide	P2344	C14412	HMDB0246504	Benzenoids	Benzene and substituted derivatives	Toluenes	1.483	172.04	[M+Na]+	C7H9NO2S	P-toluenesulfonamides	245601828	5.53002e+08	4.36975e+08	2.47055e+08	3.06464e+08	2.91612e+08	2.8171e+08
Pterostilbene	P4474	C10287	HMDB0303379	Phenylpropanoids and polyketides	Stilbenes	---	6.086	257.103	[M+H]+	C16H16O3	Stilbenes	1.08033e+08	1.07773e+08	7.92568e+07	1.60226e+08	7.89811e+07	9.92922e+07	1.12833e+08
Pseudoaspidin	P7840		---	---	---	---	5.14	461.209	[M+H]+	C25H32O8	Diphenylmethanes	6.27276e+08	4.2933e+08	5.31327e+08	7.16331e+08	4.21143e+08	4.9494e+08	5.44138e+08
Pseudo-Anisatin	P5879		---	---	---	---	6.341	321.13	[M+Na]+	C15H22O6	Lactones	3.06551e+07	1.16973e+07	4.36467e+07	2.7656e+07	2.60025e+07	2.64159e+07	2.66915e+07
Protocatechuic Acid	P2497	C00230	HMDB0001856	Benzenoids	Benzene and substituted derivatives	Benzoic acids and derivatives	1.073	177.024	[M+ACN+H]+	C7H6O4	Hydroxybenzoic acid derivatives	7.50131e+07	4.00821e+08	238777571	9.08823e+06	3.47786e+08	2.63112e+08	2.06662e+08
Propyl Gallate	P3441	C11155	HMDB0033835	Benzenoids	Benzene and substituted derivatives	Benzoic acids and derivatives	1.39	213.074	[M+H]+	C10H12O5	Galloyl esters	2.66841e+08	2.06512e+08	182735326	2.39954e+08	2.55679e+08	2.51748e+08	2.49127e+08
Proline	P900	C16435	HMDB0003411	Organic acids and derivatives	Carboxylic acids and derivatives	Amino acids, peptides, and analogues	1.43	116.071	[M+H]+	C5H9NO2	Proline and derivatives	4246762485	7691943983	4982318183	8.44015e+08	7.59775e+08	7.80835e+08	7.94875e+08
Primaquine	P4545	C07627	HMDB0015219	Organoheterocyclic compounds	Quinolines and derivatives	Aminoquinolines and derivatives	7.928	260.167	[M+H]+	C15H21N3O	Aminoquinolines and derivatives	999802	1.90727e+06	1.50927e+06	8.88652e+07	9.95905e+07	9.69091e+07	9.51216e+07
PRI	P4260		HMDB0014917	Organoheterocyclic compounds	Diazanaphthalenes	Naphthyridines	5.257	247.107	[M+H]+	C13H14N2O3		4.6657e+07	3.4212e+07	2.2433e+07	6.25407e+07	2.85423e+07	3.70419e+07	4.27083e+07
Prenyletin	P4631		---	---	---	---	7.057	264.12	[M+H]+	C14H14O4	Hydroxycoumarins	3.69825e+08	5.29828e+07	3.15302e+08	2.64494e+07	7.77303e+07	6.49101e+07	5.63633e+07
Prednisolone	P2598	C07369	HMDB0014998	Lipids and lipid-like molecules	Steroids and steroid derivatives	Hydroxysteroids	2.764	181.108	[M+H]+	C21H28O5	21-hydroxysteroids	9.7173e+08	8.23927e+08	7.97086e+08	5.22598e+08	5.41014e+08	5.3641e+08	5.3334e+08
Polyphyllin A	P9338		HMDB0029310	Lipids and lipid-like molecules	Steroids and steroid derivatives	Steroidal glycosides	6.391	577.366	[M+2H]2+	C33H52O8	Steroidal saponins	1.9203e+07	1.4162e+06	2.39901e+07	3.52312e+07	1.19671e+07	1.77831e+07	2.16605e+07
Polygalic Acid	P8166		---	---	---	---	6.282	489.312	[M+2H]2+	C29H44O6	12-alpha-hydroxysteroids	2.51709e+07	1.60124e+07	2.34333e+07	2.87628e+07	1.50716e+07	1.84944e+07	2.07762e+07
Piperine	P5601	C03882	HMDB0029377	Alkaloids and derivatives	---	---	5.073	308.117	[M+Na]+	C17H19NO3	Alkaloids and derivatives	1.82503e+07	7.22008e+06	9.76582e+06	6.66052e+07	7.30752e+07	7.14577e+07	7.03794e+07
Piperazine	P201	C07973	HMDB0014730	Organoheterocyclic compounds	Diazinanes	Piperazines	9.497	87.0922	[M+NH4]+	C4H10N2	Piperazines	3.11845e+08	1.61788e+07	1.73849e+07	1.75418e+07	1.88313e+07	1.8509e+07	1.8294e+07
Pinacidil Monohydrate	P4246		---	---	---	---	5.617	246.169	[M+H]+	C13H21N5O		7.30414e+07	8.80041e+07	6.71682e+07	1.17111e+08	8.1452e+07	9.03668e+07	9.63101e+07
Picein	P5423	C10720	---	---	---	---	7.637	299.109	[M+Na]+	C14H18O7	Phenolic glycosides	2.19307e+07	9.92924e+06	2.86715e+07	4.75404e+07	8.17022e+07	7.31618e+07	6.74681e+07
Phytosphingosine	P5832	C12144	HMDB0004610	Organic nitrogen compounds	Organonitrogen compounds	Amines	7.859	318.299	[M+H]+	C18H39NO3	Lipids	9.63828e+08	372225621	5.36851e+08	886269899	9.55031e+08	9.37841e+08	9.26381e+08
Phytolaccagenin	P8796		---	---	---	---	6.34	533.339	[M+2H]2+	C31H48O7	Triterpenoids	3.10356e+07	1.01856e+07	2.39665e+07	2.92546e+07	1.86847e+07	2.13272e+07	2.30888e+07
Phthalic Anhydride	P1766		HMDB0256501	Organoheterocyclic compounds	Benzofurans	Benzofuranones	10.338	149.023	[M+H]+	C8H4O3	Phthalic anhydrides	5585304158	2915153686	10889519373	18510523211	17434672027	17703634823	17882943354
Phomalone	P4429		---	---	---	---	6.55	255.119	[M+H]+	C13H18O5		522559	671412	839890	8.73804e+06	1.19935e+07	1.11797e+07	1.06371e+07
Phenylalanylisoleucine	P4972		HMDB0028998	Organic acids and derivatives	Carboxylic acids and derivatives	Amino acids, peptides, and analogues	5.876	279.17	[M+H]+	C15H22N2O3	Dipeptides	2.30871e+07	2.54174e+07	1.4056e+07	7.90449e+07	4.78689e+07	5.56629e+07	6.08589e+07
Phenylalanine	P2188	C02057	HMDB0250791	Organic acids and derivatives	Carboxylic acids and derivatives	Amino acids, peptides, and analogues	5.099	166.086	[M+H]+	C9H11NO2	Phenylalanine and derivatives	133000000000	132000000000	130000000000	123000000000	128000000000	126000000000	126000000000
Phellopterin	P5464	C17047	HMDB0256386	Phenylpropanoids and polyketides	Coumarins and derivatives	Furanocoumarins	1.415	301.11	[M+H]+	C17H16O5	5-methoxypsoralens	3.63408e+07	4.51946e+07	2.61349e+07	4.18192e+07	4.59018e+07	4.48811e+07	4.42007e+07
Pentadecanoyl Ethanolamide	P5609		---	---	---	---	7.886	308.242	[M+H]+	C17H35NO2	N-acylethanolamines	544144	270688	784387	2.61483e+07	2.96685e+07	2.87884e+07	2.82017e+07
Pellasoren A	P7504		---	---	---	---	8.239	432.309	[M+H-H2O]+	C26H41NO4	Delta valerolactones	8.50053e+07	8.7785e+07	8.95611e+07	1.28006e+08	1.26639e+08	1.26981e+08	1.27209e+08
Pancuronium	P5144	C07551	HMDB0015430	Lipids and lipid-like molecules	Steroids and steroid derivatives	Steroid esters	10.095	286.237	[M+H]+	[C35H60BrN2O4]+	Steroid esters	6.01935e+07	4.87611e+07	5.29567e+07	8.16118e+07	6.75284e+07	7.10493e+07	7.33965e+07
Orthanilic Acid	P2404	C06333	HMDB0304940	Benzenoids	Benzene and substituted derivatives	Benzenesulfonic acids and derivatives	5.734	174.021	[M+H]+	C6H7NO3S	Benzenesulfonic acids and derivatives	423443	8.63516e+06	3.34836e+06	1.34861e+08	7.57885e+07	9.05566e+07	1.00402e+08
Orbencarb	P4491	C11087	---	---	---	---	5.138	258.073	[M+2H]2+	C12H16ClNOS	Chlorobenzenes	1.62388e+08	1.46544e+08	1.30854e+08	1.99705e+08	125701101	1.44202e+08	1.56536e+08
Oleoylethanolamide	P5965	C20792	HMDB0002088	Organic nitrogen compounds	Organonitrogen compounds	Amines	11.2	326.304	[M+H]+	C20H39NO2	N-acylethanolamines	9.26791e+07	8.67195e+07	1.04613e+08	9.56348e+07	1.18092e+08	1.12478e+08	1.08735e+08
Oleamide	P5050	C19670	HMDB0002117	Lipids and lipid-like molecules	Fatty Acyls	Fatty amides	11.771	282.279	[M+H]+	C18H35NO	Fatty amides	2.9194e+07	2.75295e+07	4.62225e+07	4.08665e+07	3.81973e+07	3.88646e+07	3.93095e+07
Okaramine J	P8683		---	---	---	---	5.759	525.286	[2M+H]+	C32H36N4O3	Pyrroloindoles	3.54484e+07	3.57443e+07	4.24582e+07	4.55556e+07	2.8964e+07	3.31119e+07	3.58772e+07
Octhilinone	P3471	C18752	---	---	---	---	1.662	214.129	[M+H-H2O]+	C11H19NOS	Thiazoles	2946439008	591715492	1456092971	1042391375	1142936048	1117799880	1101042434
OCP	P4059		HMDB0014917	Organoheterocyclic compounds	Diazanaphthalenes	Naphthyridines	6.525	239.088	[M+H]+	C12H15ClN2O		3.51851e+08	1.28933e+08	4.25443e+08	1.83664e+08	2.85515e+08	2.60052e+08	2.43077e+08
Obtucarbamate A	P4565		---	---	---	---	1.377	261.087	[M+Na]+	C11H14N2O4	Phenylcarbamic acid esters	2.39428e+08	2.79837e+08	1.79726e+08	1.73205e+08	2.00369e+08	1.93578e+08	189051099
Notopterol	P6451	C17499	---	---	---	---	5.931	355.148	[M+K]+	C21H22O5	Terpene lactones	7.29399e+07	5.70793e+07	48503717	8.44118e+07	4.89201e+07	5.7793e+07	6.37083e+07
Norfloxacin	P5864	C06687	HMDB0015192	Organic acids and derivatives	Carboxylic acids and derivatives	Amino acids, peptides, and analogues	6.452	320.139	[M+H]+	C16H18FN3O3	Quinoline carboxylic acids	3.48857e+06	2.14674e+06	3.42532e+06	2.66734e+07	1.57922e+07	1.85125e+07	2.03261e+07
Nordihydrocapsaicin	P5772	C20216	HMDB0036328	Benzenoids	Phenols	Methoxyphenols	5.067	316.186	[M+H]+	C17H27NO3	Methoxyphenols	1.64662e+08	8.55557e+07	130631585	5.23631e+06	1.11322e+07	9.65822e+06	8.67558e+06
Norcocaine	P5235		HMDB0041955	Benzenoids	Phenol esters	---	7.662	290.138	[M+H]+	C16H19NO4	Benzoic acid esters	2.07893e+08	8.91466e+07	1.77211e+08	3.04026e+07	3.43791e+07	3.3385e+07	3.27223e+07
N-Methylnuciferine	P6090		---	---	---	---	8.665	333.166	[M+Na]+	C20H24NO2+	Aporphines	8.2555e+06	2.15573e+07	3.11132e+07	4.14203e+07	5.4288e+07	5.10711e+07	4.89265e+07
N-Methylnicotinamide	P1424		HMDB0003152	Organoheterocyclic compounds	Pyridines and derivatives	Pyridinecarboxylic acids and derivatives	3.831	137.079	[M+H]+	C7H8N2O	Nicotinamides	2827485487	2702770019	2780198090	2445716386	2410179129	2419063443	2424986319
N-Methylanthranilic Acid	P1850	C03005	HMDB0032609	Benzenoids	Benzene and substituted derivatives	Benzoic acids and derivatives	2.858	152.07	[M+H]+	C8H9NO2	Aminobenzoic acids	2111651514	6111396597	5403783332	2302643355	9020153128	7340775685	6221190723
Nicotinamide	P1062	C00153	HMDB0001406	Organoheterocyclic compounds	Pyridines and derivatives	Pyridinecarboxylic acids and derivatives	2.631	123.055	[M+H]+	C6H6N2O	Nicotinamides	79598082999	78122310191	81212037788	53208516277	55099138408	54626482875	54311379187
N-Fructosyl Tyrosine	P6277		---	---	---	---	4.473	344.133	[M+H]+	C15H21NO8	N-Fructosyl amino acids	5024617264	3697916897	3530103289	10664139450	11680009776	11426042195	11256730474
N-Fructosyl Isoleucylglutamate	P7384		---	---	---	---	7.873	423.197	[M+H]+	C17H30N2O10	N-Fructosyl peptides	9.75942e+06	6.63869e+06	7.88337e+06	3.95425e+07	40105710	3.99649e+07	3.9871e+07
N-Fructosyl Isoleucine	P5308		---	---	---	---	5.004	294.154	[M+H]+	C12H23NO7	N-Fructosyl amino acids	32565581275	28060078948	33352234574	71130612902	85482072360	81894207496	79502297586
Nelfinavir Mesylate	P9227	C08091	HMDB0014365	Organic acids and derivatives	Carboxylic acids and derivatives	Amino acids, peptides, and analogues	9.651	568.334	[M+H]+	C33H49N3O7S2		512047	635667	613828	3.29298e+07	2.46046e+07	2.66859e+07	2.80734e+07
Nalidixic Acid	P3941	C05079	HMDB0014917	Organoheterocyclic compounds	Diazanaphthalenes	Naphthyridines	6.285	233.092	[M+H-H2O]+	C12H12N2O3	Naphthyridine carboxylic acids and derivatives	1.60666e+08	4.58477e+07	1.01931e+08	9.06892e+07	6.84743e+07	7.4028e+07	7.77305e+07
N-Acetyl-L-Aspartic Acid	P2476	C01042	HMDB0000812	Organic acids and derivatives	Carboxylic acids and derivatives	Amino acids, peptides, and analogues	5.2	176.056	[M+ACN+H]+	C6H9NO5	Aspartic acid and derivatives	3.29181e+07	3.0776e+07	1.70991e+07	2.71545e+07	1.62412e+07	1.89695e+07	2.07884e+07
N-Acetylarginine	P3561		---	---	---	---	2.348	217.129	[M+H]+	C8H16N4O3	N-acyl-L-alpha-amino acids	4.38875e+08	2.14231e+08	3.07849e+08	1.44533e+08	2.19159e+08	200502200	1.88065e+08
N,O-Didesmethylvenlafaxine	P4333		HMDB0060852	Organic oxygen compounds	Organooxygen compounds	Alcohols and polyols	8.016	250.177	[M+H]+	C15H23NO2	Cyclohexanols	3.85125e+08	5.61042e+08	5.00706e+08	4.71171e+08	7.89073e+08	7.09598e+08	6.56614e+08
N,N-Dimethyldodecylamine N-Oxide	P3889		---	---	---	---	7.853	230.248	[M+H]+	C14H31NO	Long-chain alkyl amine oxides	2961568330	1038427164	1582868772	2116795228	2533693052	2429468596	2359985625
N,N-Dimethylarginine	P3225	C03626	HMDB0001539	Organic acids and derivatives	Carboxylic acids and derivatives	Amino acids, peptides, and analogues	1.668	203.15	[M+H]+	C8H18N4O2		5.81601e+08	3.58635e+08	5.73179e+08	5.21681e+08	5.12526e+08	5.14815e+08	5.16341e+08
N,N-Dimethylaniline	P1033	C02846	HMDB0001020	Organic nitrogen compounds	Organonitrogen compounds	Amines	13.379	122.096	[M+H]+	C8H11N	Dialkylarylamines	1652199425	1084122015	1406303245	1102910385	1348719084	1287266909	1246298793
N,N-Diethyl-4-Hydroxybenzamide	P2978		---	---	---	---	8.009	194.117	[M+H]+	C11H15NO2	Benzamides	3.74425e+08	4.70348e+08	4.94208e+08	5.52086e+08	579421076	5.72587e+08	5.68032e+08
N-(9-Oxodecyl)Acetamide	P3484		---	---	---	---	7.584	214.18	[M+ACN+H]+	C12H23NO2	Acetamides	5.16814e+07	4.39779e+07	4.07612e+07	5.49062e+07	6.53516e+07	6.27402e+07	6.09993e+07
N-(3-Methoxybenzyl)Palmitamide	P6776		---	---	---	---	10.937	376.318	[M+Na]+	C24H41NO2	Anisoles	9.58712e+06	8.52529e+06	8.50964e+06	1.94158e+07	2.14782e+07	2.09626e+07	2.06189e+07
N-(2-Hydroxy-2-Phenylethyl)-2-[4-(4-Methoxyphenyl)-2-Oxochromen-7-Yl]Oxyacetamide	P7647		---	---	---	---	2.997	446.156	[M+H]+	C26H23NO6		1.20017e+08	5.57724e+07	3.30846e+06	1.40313e+08	2.09579e+07	5.07966e+07	7.06891e+07
N-(2-Aminobenzoyl)Alanine	P3897		---	---	---	---	5.962	231.073	[M+Na]+	C10H12N2O3	Hippuric acids	1.23448e+08	7.42504e+07	8.7978e+07	6.19304e+07	2.29417e+07	3.26889e+07	3.9187e+07
Mycosporine Serinol	P4581		---	---	---	---	2.377	262.127	[M+H]+	C11H19NO6		5457370349	5070132568	5536206304	13978851277	16617211729	15957621616	15517894874
Mycophenolate	P5880	C20380	HMDB0015159	Organoheterocyclic compounds	Isocoumarans	Isobenzofuranones	5.22	321.143	[2M+H]+	C17H20O6	Phthalides	2.71202e+07	7.9047e+07	3.17243e+07	2.63409e+07	3.09354e+07	2.97868e+07	2.9021e+07
Miglitol	P3333	C07708	HMDB0014634	Organoheterocyclic compounds	Piperidines	---	6.827	208.117	[M+H]+	C8H17NO5	Piperidines	1.6218e+07	7.03025e+07	8.33103e+07	2.09751e+06	5.31709e+06	4.51219e+06	3.97559e+06
Microcolin H	P10884		---	---	---	---	12.001	756.547	[M+Na]+	C38H63N5O9		308116172	2.47405e+08	1.8731e+08	4.92817e+07	6.56785e+07	6.15793e+07	5.88465e+07
Metrazoline	P2797		---	---	---	---	7.86	187.126	[M+Na]+	C14H16N2O4		1024969009	7.09201e+08	1082239299	4.49924e+08	4.76884e+08	4.70144e+08	4.65651e+08
Methyl Gallate	P2732		HMDB0254590	Benzenoids	Benzene and substituted derivatives	Benzoic acids and derivatives	1.35	185.041	[M+H]+	C8H8O5	Galloyl esters	13708841130	14923817054	13660861246	8801810223	9618850784	9414590643	9278417217
Methyl 2-(2-Amino-4-Hydroxy-6-Methylpyrimidin-5-Yl)Acetate	P3065		---	---	---	---	5.004	198.087	[M+H]+	C8H11N3O3	Pyrimidones	4.8681e+08	5.17532e+08	4.8817e+08	3.41127e+08	4.7724e+08	4.43212e+08	4.20526e+08
Methyl 2-((4-Methyl-2-Oxo-2H-Chromen-7-Yl)Oxy)Propanoate	P4610		---	---	---	---	5.041	263.095	[M+H]+	C14H14O5	Coumarins and derivatives	1564956173	1581376859	1526889566	1223623507	1396668243	1353407059	1324566269
Methionine	P1805	C01733	HMDB0033951	Organic acids and derivatives	Carboxylic acids and derivatives	Amino acids, peptides, and analogues	2.251	150.058	[M+H]+	C5H11NO2S	Methionine and derivatives	62945045050	68087858597	69333539868	51478175159	66106554701	62449459815	60011396558
Metazachlor	P4947	C10948	HMDB0254508	Benzenoids	Benzene and substituted derivatives	Anilides	5.483	278.105	[M+NH4]+	C14H16ClN3O	Anilides	1.14285e+07	9.31761e+06	6.74497e+06	1.26039e+07	2.77637e+06	5.23326e+06	6.87118e+06
Mepirizole	P3986		HMDB0254454	Organic oxygen compounds	Organooxygen compounds	Ethers	5.624	235.117	[M+H]+	C11H14N4O2	Alkyl aryl ethers	7.12781e+07	6.60212e+07	3.17659e+07	2.49721e+07	9.5011e+06	1.33689e+07	1.59474e+07
Menthol(-)	P2422		---	---	---	---	6.478	174.185	[M+H]+	C10H20O	Menthane monoterpenoids	9.8989e+07	2.55068e+07	5.03133e+07	7.09563e+07	5.16475e+07	5.64747e+07	5.96928e+07
Menaquinone-4	P7641		HMDB0030020	Lipids and lipid-like molecules	Prenol lipids	Quinone and hydroquinone lipids	9.998	445.312	[M+Na]+	C31H40O2	Menaquinones	2.76827e+07	1.74892e+07	2.32283e+07	3.47313e+07	43517888	4.13212e+07	3.98568e+07
Memantine	P2572	C13736	HMDB0015177	Organic nitrogen compounds	Organonitrogen compounds	Amines	7.418	180.174	[M+H-H2O]+	C12H21N	Monoalkylamines	2.61705e+07	1.36868e+07	1.97615e+07	2.81758e+07	3.45778e+07	3.29773e+07	3.19103e+07
Melibiose	P6589	C05402	HMDB0000048	Organic oxygen compounds	Organooxygen compounds	Carbohydrates and carbohydrate conjugates	1.366	365.105	[M+Na]+	C12H22O11	O-glycosyl compounds	903119483	1353942943	9.7288e+08	6.42732e+08	6.89962e+08	6.78154e+08	6.70283e+08
Melezitose	P8703	C08243	HMDB0011730	Organic oxygen compounds	Organooxygen compounds	Carbohydrates and carbohydrate conjugates	1.786	527.156	[M+Na]+	C18H32O16	Oligosaccharides	2.24382e+08	105092147	173710413	2.94959e+08	189731834	2.16039e+08	2.33577e+08
Matairesinol	P6498	C10682	HMDB0035698	Lignans, neolignans and related compounds	Furanoid lignans	Tetrahydrofuran lignans	1.382	359.152	[2M+H]+	C20H22O6	Dibenzylbutyrolactone lignans	7.1829e+07	1.11722e+08	1.02043e+08	9.87888e+07	9.92095e+07	9.91043e+07	9.90342e+07
Malvidin	P6427	C08716	HMDB0131420	Phenylpropanoids and polyketides	Flavonoids	O-methylated flavonoids	1.41	354.076	[M+ACN+H]+	C17H15O7+	3'-O-methylated flavonoids	6.96114e+08	805686464	7.39794e+08	3.24119e+08	3.38285e+08	3.34743e+08	332382439
Magnoflorine	P6265	C09581	HMDB0304413	Alkaloids and derivatives	Aporphines	---	6.797	343.172	[M+H]+	C20H24NO4+	Aporphines	437490	327472	2.29957e+06	3.34614e+07	3.86922e+07	3.73845e+07	3.65127e+07
Lysine	P1731	C16440	HMDB0301757	Organic acids and derivatives	Carboxylic acids and derivatives	Amino acids, peptides, and analogues	1.12	147.112	[M+H]+	C6H14N2O2	D-alpha-amino acids	1363533479	1312015722	9.45166e+08	1078510137	1058769083	1063704346	1066994522
Lycorine Hydrochloride	P5914		---	---	---	---	1.414	324.102	[M+Na]+	C16H18ClNO4	Lycorine-type amaryllidaceae alkaloids	5.8054e+07	7.883e+07	6.63343e+07	1.71341e+08	2.24034e+08	2.10861e+08	2.02079e+08
Lucidenic Acid D	P8837		HMDB0036435	Lipids and lipid-like molecules	Prenol lipids	Triterpenoids	9.354	537.244	[M+Na]+	C29H38O8	Triterpenoids	8.345e+06	2.06799e+07	1.51862e+07	2.94683e+07	2.36091e+07	2.50739e+07	2.60504e+07
L-Tryptophan	P3264	C00078	HMDB0000929	Organoheterocyclic compounds	Indoles and derivatives	Indolyl carboxylic acids and derivatives	5.277	205.097	[M+H]+	C11H12N2O2	Indolyl carboxylic acids and derivatives	53974852629	53529673087	32268297567	59411359957	51990957608	53846058195	55082791920
Liquidambaric Lactone	P8198		---	---	---	---	5.337	491.31	[M+Na]+	C30H44O4	Triterpenoids	3.51152e+07	4.31328e+07	4.05414e+07	9.87663e+07	7.99321e+07	8.46407e+07	8.77797e+07
Linoleoyl Ethanolamide	P5920		HMDB0012252	Organic nitrogen compounds	Organonitrogen compounds	Amines	8.437	324.287	[M+H]+	C20H37NO2	N-acylethanolamines	2.55841e+07	2.04917e+07	3.83944e+07	5.144e+07	6.74483e+07	6.34462e+07	6.07782e+07
LID	P3992	D00358	---	---	---	---	5.85	235.18	[M+H]+	C14H22N2O	m-Xylenes	145386278	1.42194e+08	1.24909e+08	1.4183e+08	7.55762e+07	9.21397e+07	1.03182e+08
Licoflavanone	P6562		HMDB0029866	Phenylpropanoids and polyketides	Flavonoids	Flavans	2.833	363.119	[M+H]+	C20H20O5	3'-prenylated flavanones	30780570	3.21943e+06	0	7.77538e+07	4.21185e+07	5.10273e+07	5.69666e+07
L-Glutamic Acid	P1744	C00025	HMDB0000148	Organic acids and derivatives	Carboxylic acids and derivatives	Amino acids, peptides, and analogues	1.539	148.06	[M+H]+	C5H9NO4	Glutamic acid and derivatives	3.47375e+08	2.61447e+08	341998596	285206145	2.17098e+08	2.34125e+08	2.45476e+08
Levetiracetam	P2322	C07841	HMDB0015333	Organic acids and derivatives	Carboxylic acids and derivatives	Amino acids, peptides, and analogues	5.746	171.113	[M+H]+	C8H14N2O2	Alpha amino acids and derivatives	11388876726	4629400712	5608499172	4933951165	3729791373	4030831321	4231524620
Leupeptin Pr-Ll	P7598		---	---	---	---	10.607	441.319	[M+H]+	C21H40N6O4	Peptides	2.36399e+07	13415112	1.98655e+07	1.30029e+07	9.82067e+06	1.06162e+07	1.11466e+07
L-Cystine	P4602	C00491	HMDB0000192	Organic acids and derivatives	Carboxylic acids and derivatives	Amino acids, peptides, and analogues	1.077	263.009	[M+NH4]+	C6H12N2O4S2	L-cysteine-S-conjugates	1.64131e+07	4.73638e+07	2.99931e+07	9.89953e+06	4.18211e+07	3.38407e+07	2.85204e+07
Laurinterol	P5328	C17136	---	---	---	---	2.987	295.065	[M+H-H2O]+	C15H19BrO		2.34292e+07	4.48023e+07	4.08972e+07	1736344090	1947680604	1894846475	1859623723
Kynurenine	P3353	C01718	HMDB0000684	Organic oxygen compounds	Organooxygen compounds	Carbonyl compounds	5.094	209.092	[M+H]+	C10H12N2O3	Alkyl-phenylketones	4.63839e+08	4.5332e+08	4.69944e+08	2.78788e+08	314395580	3.05494e+08	2.99559e+08
Kynurenic Acid	P2857	C01717	HMDB0000715	Organoheterocyclic compounds	Quinolines and derivatives	Quinoline carboxylic acids	10.337	190.049	[M+ACN+H]+	C10H7NO3	Quinoline carboxylic acids	2.83128e+08	1.51947e+08	5.65022e+08	1018298847	9.76781e+08	9.8716e+08	9.9408e+08
Kobusone	P3703	C16983	HMDB0036790	Organic oxygen compounds	Organooxygen compounds	Carbonyl compounds	2.008	223.166	[M+ACN+H]+	C14H22O2	Ketones	2.11433e+08	3.05228e+08	3.09148e+08	1.40796e+08	274704644	2.41228e+08	2.18909e+08
Khellin	P5062	C09010	HMDB0253797	Organoheterocyclic compounds	Benzopyrans	1-benzopyrans	1.373	283.061	[M+Na]+	C14H12O5	Furanochromones	1.1441e+08	1.27034e+08	1.04272e+08	1.05202e+08	1.23712e+08	1.19084e+08	115999265
Ketoisovaleric Acid	P921		---	---	---	---	5.277	117.057	[M+Na]+	C5H8O3	Short-chain keto acids and derivatives	4.2796e+08	3.765e+08	2.88251e+08	424217816	3.35618e+08	3.57768e+08	3.72534e+08
Kasugamycin	P6825	C17968	---	---	---	---	2.126	380.164	[M+H]+	C14H25N3O9	Aminocyclitol glycosides	1.09027e+08	9.4737e+07	1.51786e+08	1.3855e+08	1.74395e+08	1.65434e+08	1.5946e+08
Jervine	P7419	C10811	HMDB0253731	Lipids and lipid-like molecules	Steroids and steroid derivatives	Steroidal alkaloids	8.194	426.296	[M+H]+	C27H39NO3	Jerveratrum-type alkaloids	3.66038e+07	5.11738e+07	4.95044e+07	3.27972e+07	3.83338e+07	3.69496e+07	3.60269e+07
Isosafrole	P3149	C10472	HMDB0253689	Organoheterocyclic compounds	Benzodioxoles	---	1.35	201.036	[M+Na]+	C10H10O2	Benzodioxoles	664510003	1036959856	5.44562e+08	4.35739e+08	5.1577e+08	4.95762e+08	4.82424e+08
Isopalmitic Acid	P4862		HMDB0031068	Lipids and lipid-like molecules	Fatty Acyls	Fatty acids and conjugates	7.815	274.273	[M+H]+	C16H32O2	Long-chain fatty acids	20108314242	10947226463	13155331376	14659020053	16260172540	15859884418	15593025670
Isoleucylvaline	P3905		HMDB0028920	Organic acids and derivatives	Carboxylic acids and derivatives	Amino acids, peptides, and analogues	5.217	231.17	[M+H]+	C11H22N2O3	Dipeptides	4.62883e+07	4.41017e+07	2.64302e+07	8.54252e+07	3.61822e+07	4.84929e+07	5.67001e+07
Isoleucylglutamate	P4567		HMDB0028906	Organic acids and derivatives	Carboxylic acids and derivatives	Amino acids, peptides, and analogues	2.989	261.144	[M+H]+	C11H20N2O5	Dipeptides	2.4293e+08	3.96871e+08	3.14488e+08	2.90274e+08	3.1644e+08	3.09898e+08	3.05537e+08
Isofraxidin	P4560	C17480	HMDB0253642	Phenylpropanoids and polyketides	Coumarins and derivatives	Hydroxycoumarins	1.341	261.011	[M+H]+	C11H10O5	7-hydroxycoumarins	1.39174e+08	231805852	1.68882e+08	1.43493e+08	1.72428e+08	1.65194e+08	1.60372e+08
Isocurcumenol	P4477		HMDB0036647	Lipids and lipid-like molecules	Prenol lipids	Sesquiterpenoids	5.147	257.149	[M+H]+	C15H22O2	Guaianes	3.42927e+08	3.128e+08	3.28785e+08	1.40627e+07	5.50214e+06	7.64228e+06	9.06904e+06
Irigenin	P6530	C17957	HMDB0303159	Phenylpropanoids and polyketides	Isoflavonoids	O-methylated isoflavonoids	5.728	361.085	[M+H]+	C18H16O8	3'-hydroxy,4'-methoxyisoflavonoids	3.73134e+06	6.5944e+06	8.27222e+06	1.37828e+07	8.33e+06	9.6932e+06	1.0602e+07
Ingenol	P6357	C09112	HMDB0253484	Lipids and lipid-like molecules	Prenol lipids	Diterpenoids	7.106	349.2	[2M+H]+	C20H28O5	Tigliane and ingenane diterpenoids	6.77234e+07	3.7371e+07	6.92262e+07	3.46915e+07	4.50817e+07	4.24841e+07	4.07524e+07
Indoxyl Sulfate	P1354		HMDB0000682	Organic acids and derivatives	Organic sulfuric acids and derivatives	Arylsulfates	2.786	134.06	[M+H]+	C8H7NO4S	Arylsulfates	3.6205e+08	3.24223e+07	1.69986e+07	5.2292e+08	4.10925e+08	4.38924e+08	4.5759e+08
Indoline	P998		HMDB0253472	Organoheterocyclic compounds	Indoles and derivatives	Indolines	5.102	120.081	[M+H]+	C8H9N	Indolines	104000000000	106000000000	99242186110	95910648018	101000000000	99980453255	99076052091
Indole-3-Pyruvic Acid	P3237		HMDB0060484	Organoheterocyclic compounds	Indoles and derivatives	Indolyl carboxylic acids and derivatives	1.894	204.063	[M+H]+	C11H9NO3	Indolyl carboxylic acids and derivatives	1779662605	9578861612	10877893166	1882088263	3177911320	2853955556	2637985047
Indole-3-carbaldehyde	P1686	C08493	HMDB0029737	Organoheterocyclic compounds	Indoles and derivatives	Indoles	5.279	146.06	[M+H]+	C9H7NO	Indoles	4376272434	4102676769	2883603688	4560069561	3602678196	3842026037	4001591265
Icos-19-Ene-1,2,4-Triol	P6312		---	---	---	---	8.482	346.331	[M+Na]+	C20H40O3	Long-chain fatty alcohols	9.18291e+07	9.06546e+07	9.66714e+07	1.55433e+08	1.55297e+08	1.55331e+08	1.55354e+08
Hypoxanthine	P1407	C00262	HMDB0000157	Organoheterocyclic compounds	Imidazopyrimidines	Purines and purine derivatives	3.002	137.045	[M+H]+	C5H4N4O	Hypoxanthines	1003957136	805132784	1070832090	11296496038	13175004468	12705377361	12392292622
Hypotaurine	P714	C00519	HMDB0000965	Organic acids and derivatives	Sulfinic acids and derivatives	Sulfinic acids	13.25	110.02	[M+NH4]+	C2H7NO2S	Sulfinic acids	4.0725e+06	2.16308e+07	1.54205e+07	1.06875e+07	1.087e+07	1.08244e+07	1.0794e+07
Hyocholic Acid	P2014	C17649	HMDB0000760	Lipids and lipid-like molecules	Steroids and steroid derivatives	Bile acids, alcohols and derivatives	8.242	158.154	[M+H]+	C24H40O5		1.27158e+08	1.36031e+08	1.39472e+08	1.43577e+08	1.72554e+08	1.6531e+08	1.6048e+08
Hydrocortisone	P6568	C00735	HMDB0000063	Lipids and lipid-like molecules	Steroids and steroid derivatives	Hydroxysteroids	7.044	363.215	[M+H]+	C21H30O5	21-hydroxysteroids	5036817465	2683457673	4760580287	5979289184	6172630137	6124294899	6092071407
Hydrocortisonacetate	P7175	D00165	---	---	---	---	7.957	405.225	[M+H]+	C23H32O6	Gluco/mineralocorticoids, progestogins and derivatives	5.32388e+07	4.56188e+07	5.25745e+07	6.40374e+07	6.60224e+07	6.55261e+07	6.51953e+07
Heliocurassavicine N-Oxyde	P5497		---	---	---	---	5.082	302.206	[M+2H]2+	C15H27NO5	Pyrrolizidines	2.17766e+08	1.9419e+08	210929677	1.79224e+08	2.07917e+08	2.00744e+08	1.95962e+08
Harmol Hydrochloride	P3648		---	---	---	---	6.146	221.066	[M+H-H2O]+	C12H10N2O	Harmala alkaloids	1446808487	1611567947	1543465753	9.3587e+08	5.33684e+08	6.3423e+08	7.01261e+08
Guanosine 5'-Monophosphate	P6575	C00144	HMDB0001397	Nucleosides, nucleotides, and analogues	Purine nucleotides	Purine ribonucleotides	6.147	364.068	[M+H]+	C10H14N5O8P	Purine ribonucleoside monophosphates	1.2444e+08	181333861	1.95034e+08	8.57243e+07	7.7425e+07	7.94998e+07	8.0883e+07
Guanosine	P5082	C00387	HMDB0000133	Nucleosides, nucleotides, and analogues	Purine nucleosides	---	5.012	284.098	[M+H]+	C10H13N5O5	Purine nucleosides	5.36595e+06	1.3999e+07	1.32934e+07	3.70001e+07	5.43009e+07	4.99757e+07	4.70923e+07
Guanine	P1841	C00242	HMDB0000132	Organoheterocyclic compounds	Imidazopyrimidines	Purines and purine derivatives	2.964	152.07	[M+H]+	C5H5N5O	Purines and purine derivatives	6582489846	2872326433	3307185391	5972682311	9019112559	8257504997	7749766623
Glycohyocholic Acid	P8156		HMDB0240607	Lipids and lipid-like molecules	Steroids and steroid derivatives	Bile acids, alcohols and derivatives	9.085	488.299	[M+H-H2O]+	C26H43NO6		226431018	1.36004e+08	1.20357e+08	5.61499e+07	5.0154e+07	5.16529e+07	5.26523e+07
Glycodeoxycholic Acid	P7951	C05464	HMDB0000631	Lipids and lipid-like molecules	Steroids and steroid derivatives	Bile acids, alcohols and derivatives	8.239	472.302	[M+Na]+	C26H43NO5		1.80213e+07	1.74362e+07	2.15135e+07	3.31792e+07	3.54278e+07	3.48656e+07	3.44909e+07
Glycocyamine	P931	C00581	HMDB0000128	Organic acids and derivatives	Carboxylic acids and derivatives	Amino acids, peptides, and analogues	5.279	118.065	[M+H]+	C3H7N3O2	Alpha amino acids and derivatives	2231429260	2072361169	1444643749	2119549216	1735527668	1831533055	1895536646
Glutamylphenylalanine	P5334		HMDB0029156	Organic acids and derivatives	Carboxylic acids and derivatives	Amino acids, peptides, and analogues	5.405	295.129	[M+H]+	C14H18N2O5	Dipeptides	3.04011e+08	285622289	2.02004e+08	2.09901e+08	1.06209e+08	1.32132e+08	149413950
Glutamine (L)	P2267		---	---	---	---	1.471	169.058	[M+Na]+	C5H10N2O3	L-alpha-amino acids	1898118538	6.89362e+08	1774287115	1537765934	1680767112	1645016818	1621183288
Glutamine	P1723	C00303	HMDB0003423	Organic acids and derivatives	Carboxylic acids and derivatives	Amino acids, peptides, and analogues	1.513	147.076	[M+H]+	C5H10N2O3	Alpha amino acids	1948316426	2334309575	2242334609	1980123448	2395486815	2291645973	2222418746
Gaultherin	P2448		HMDB0303042	Organic oxygen compounds	Organooxygen compounds	Carbohydrates and carbohydrate conjugates	5.76	175.034	[M+Na]+	C19H26O12	Phenolic glycosides	2.51632e+08	3.83386e+08	8.75883e+08	3.08389e+08	564393693	5.00393e+08	457725137
Gardenin B	P6496	C15109	HMDB0302154	Phenylpropanoids and polyketides	Flavonoids	O-methylated flavonoids	5.118	359.12	[M+H-H2O]+	C19H18O7	8-O-methylated flavonoids	415555878	3.9161e+08	385122995	2.13654e+08	2.71001e+08	2.56665e+08	2.47107e+08
Ganolactone B	P7816		---	---	---	---	12.088	459.263	[M+H]+	C27H38O6	Triterpenoids	1.29709e+07	9.08602e+06	1.26635e+07	1.67298e+07	1.40752e+07	1.47389e+07	1.51813e+07
Gamma-Sitosterol	P7562	C19654	HMDB0000649	Lipids and lipid-like molecules	Steroids and steroid derivatives	Stigmastanes and derivatives	9.736	437.372	[M+H]+	C29H50O	Stigmastanes and derivatives	4.77112e+07	5.22403e+07	1.95369e+07	5.6001e+07	4.65572e+07	4.89182e+07	5.04921e+07
Gamma-Glutamylleucine	P4568		HMDB0011171	Organic acids and derivatives	Carboxylic acids and derivatives	Amino acids, peptides, and analogues	5.291	261.144	[M+H]+	C11H20N2O5	Dipeptides	8.20185e+08	8.12776e+08	4.47539e+08	5.94963e+08	3.41196e+08	4.04637e+08	4.46932e+08
Fuziline	P7997		HMDB0252558	Lipids and lipid-like molecules	Prenol lipids	Diterpenoids	8.758	476.262	[M+H]+	C24H39NO7	Aconitane-type diterpenoid alkaloids	1.92259e+07	4.07817e+07	2.37051e+07	1.08052e+07	6.38558e+06	7.49049e+06	8.22709e+06
Fusidic Acid	P9065	C06694	HMDB0015570	Lipids and lipid-like molecules	Steroids and steroid derivatives	Steroid esters	6.367	555.352	[M+2H]2+	C31H48O6	Steroid esters	2.80922e+07	8.93943e+06	2.36608e+07	3.34234e+07	2.02681e+07	2.35569e+07	2.57495e+07
Fumaric Acid	P1461	C00122	HMDB0000134	Organic acids and derivatives	Carboxylic acids and derivatives	Dicarboxylic acids and derivatives	13.331	138.995	[M+ACN+H]+	C4H4O4	Dicarboxylic acids and derivatives	794889	492896	552461	266572	1.80549e+06	1.42076e+06	1.16427e+06
Formestane	P5522		---	---	---	---	7.766	303.194	[M+H]+	C19H26O3	Androgens and derivatives	2.77151e+08	2.09616e+08	2.73848e+08	1.26514e+08	1.48601e+08	1.43079e+08	1.39398e+08
Folic Acid	P7602	C00504	HMDB0000121	Benzenoids	Phenols	Methoxyphenols	5.2	442.145	[M+H]+	C19H19N7O6	Glutamic acid and derivatives	4914145974	4489393850	3545839667	4620563938	2533173870	3055021387	3402919732
Fluorene	P2223	C07715	HMDB0252355	Benzenoids	Fluorenes	---	2.133	167.092	[M+H]+	C13H10	Fluorenes	7630543367	6980939695	6784361217	5019155455	4912010481	4938796724	4956654220
Fleroxacin	P6667	C13179	HMDB0252299	Organoheterocyclic compounds	Quinolines and derivatives	Quinoline carboxylic acids	5.115	370.138	[M+Na]+	C17H18F3N3O3	Quinoline carboxylic acids	310276	272074	4.00717e+06	3.60334e+07	6.64138e+07	5.88187e+07	5.37553e+07
Ferulic Acid Ethyl Ester	P4215		---	---	---	---	1.351	245.062	[M+Na]+	C12H14O4	Coumaric acids and derivatives	3.3819e+08	3.9141e+08	2.8752e+08	2.95486e+08	2.7111e+08	2.77204e+08	2.81267e+08
Eudesmin	P7230		---	---	---	---	5.278	409.186	[2M+H]+	C22H26O6	Furanoid lignans	9.50513e+08	1096156711	3.3595e+08	1213825083	6.30592e+08	7.76401e+08	8.73606e+08
Ethylenethiourea	P535	C14398	---	---	---	---	2.512	103.039	[M+H]+	C3H6N2S	Imidazolidines	5123727381	6556636415	5108786645	1906436588	3430733431	3049659220	2795609746
Ethyl 3-(2,4-Dihydroxy-6-Methylpyridin-3-Yl)-3-(3-Hydroxyphenyl)Propanoate	P5823		---	---	---	---	1.781	318.129	[M+H]+	C17H19NO5	Pyridinones	3.54993e+07	1.61157e+07	7.03237e+07	2.176e+08	2.55608e+08	2.46106e+08	2.39772e+08
Ethotoin	P3262	C07839	HMDB0014892	Organoheterocyclic compounds	Azolidines	Imidazolidines	6.385	205.097	[2M+H]+	C11H12N2O2		3389060966	8.60978e+08	2080954824	1435434596	1164671157	1232362017	1277489257
Esculin	P6224	C09264	HMDB0030820	Phenylpropanoids and polyketides	Coumarins and derivatives	Coumarin glycosides	5.394	341.079	[M+H]+	C15H16O9	Coumarin glycosides	5.36381e+07	5.4621e+07	2.86855e+07	1.2229e+08	6.24398e+07	7.74024e+07	8.73775e+07
Esculetin	P2535	C09263	HMDB0030819	Phenylpropanoids and polyketides	Coumarins and derivatives	Hydroxycoumarins	1.427	179.017	[M+K]+	C9H6O4	6,7-dihydroxycoumarins	6.99712e+08	7.56618e+08	8.17513e+08	6.60285e+08	8.98596e+08	8.39018e+08	7.99299e+08
Erucamide	P6184		HMDB0244507	Lipids and lipid-like molecules	Fatty Acyls	Fatty amides	11.137	338.341	[M+H]+	C22H43NO	Fatty amides	3.79148e+08	3102505740	2046662872	2.95483e+08	7768772312	5900449936	4654901685
Epiandrosterone	P5267	C07635	HMDB0000365	Lipids and lipid-like molecules	Steroids and steroid derivatives	Androstane steroids	7.893	291.215	[M+H]+	C19H30O2	Androgens and derivatives	4.8856e+06	4.38899e+06	4.11223e+06	6.53868e+07	6.87772e+07	6.79296e+07	6.73645e+07
Emetine Hydrochloride	P8862		HMDB0035595	Lipids and lipid-like molecules	Prenol lipids	Monoterpenoids	9.881	539.26	[M+Na]+	C29H41ClN2O4	Emetine alkaloids	9.04375e+07	6.52536e+07	7.6817e+07	7.08169e+07	5.43815e+07	5.84903e+07	6.12296e+07
Dorzolamide Hydrochloride	P5932		HMDB0015007	Organoheterocyclic compounds	Thiophenes	2,3,5-trisubstituted thiophenes	1.411	325.037	[M+H]+	C10H17ClN2O4S3		9.38784e+08	1263291882	1017465494	1.1076e+08	1.2134e+08	1.18695e+08	1.16931e+08
Dobutamine	P5492	C06967	HMDB0014979	Benzenoids	Phenols	Benzenediols	5.006	302.171	[M+H]+	C18H23NO3	Catecholamines and derivatives	2.395e+08	1.29674e+08	1.73544e+08	246686	1.13291e+07	8.55847e+06	6.71141e+06
Dl-Norleucine	P1300		HMDB0251526	Organic acids and derivatives	Carboxylic acids and derivatives	Amino acids, peptides, and analogues	2.83	132.102	[M+H]+	C6H13NO2	L-alpha-amino acids	70160647551	66290466245	50142694198	130000000000	164000000000	156000000000	150000000000
Di-O-Methylfraxetin	P4514		---	---	---	---	6.43	259.052	[M+Na]+	C12H12O5	Coumarins and derivatives	2.449e+07	6.3501e+06	2.61581e+07	7.48821e+07	5.3743e+07	5.90278e+07	6.2551e+07
Dimethyl Sulfoxide	P47	C11143	HMDB0002151	Organosulfur compounds	Sulfoxides	---	1.548	79.0217	[M+H]+	C2H6OS	Sulfoxides	19822645518	28225678988	17004482849	50927122524	57399608384	55781486919	54702739275
Dihydroxy (3Alpha,12Alpha)Pregnan-20-One	P6128		---	---	---	---	10.037	335.278	[M+H]+	C21H34O3		4.1594e+07	4.12327e+07	4.50157e+07	1.03018e+08	8.2506e+07	8.7634e+07	9.10526e+07
Dihydrolycorine	P5682		---	---	---	---	7.662	312.119	[M+Na]+	C16H19NO4	Lycorine-type amaryllidaceae alkaloids	4.78497e+07	1.7958e+07	3.82423e+07	8.82518e+06	9.85941e+06	9.60085e+06	9.42848e+06
Dibutyl Phthalate	P4967	C14214	HMDB0033244	Benzenoids	Benzene and substituted derivatives	Benzoic acids and derivatives	10.336	279.158	[M+H]+	C16H22O4	Benzoic acid esters	3786922360	1913622190	7371174614	13318143217	12796914577	12927221737	13014093177
Diallyl Trisulfide	P3547		HMDB0031154	Organosulfur compounds	Organic trisulfides	---	1.089	216.95	[M+H]+	C6H10S3	Organic trisulfides	6018118	6708177	2.30471e+06	2.18845e+07	1.79003e+07	1.88964e+07	1.95604e+07
Di(2-Ethylhexyl)Phthalate	P6977	C03690	HMDB0251427	Benzenoids	Benzene and substituted derivatives	Benzoic acids and derivatives	13.123	391.283	[M+H]+	C24H38O4	Benzoic acid esters	4.2811e+08	4.95454e+08	3.71816e+08	8.63484e+08	1016408708	9.78177e+08	9.5269e+08
Desferrioxamine B	P9140		HMDB0014884	Organic acids and derivatives	Carboxylic acids and derivatives	Carboxylic acid derivatives	10.911	561.395	[M+H]+	C25H48N6O8	Acetohydroxamic acids	1.24329e+07	9.92216e+06	1.00959e+07	1.92475e+07	1.98067e+07	1.96669e+07	1.95737e+07
Derysphingosine	P5447		---	---	---	---	8.608	300.289	[M+H]+	C18H37NO2	1,2-aminoalcohols	4.17943e+07	6.4986e+07	7.17189e+07	1.71838e+08	1.76008e+08	1.74966e+08	1.74271e+08
Demethyleneberberine	P5937		---	---	---	---	5.307	325.129	[M+H]+	C19H18NO4+	Protoberberine alkaloids and derivatives	1.55066e+08	1.53427e+08	9.78517e+07	3.03135e+07	1.68732e+07	2.02333e+07	2.24733e+07
Dehydrophytosphingosine	P5778		HMDB0038057	Organic nitrogen compounds	Organonitrogen compounds	Amines	8.347	316.284	[M+H]+	C18H37NO3	Lipids	1.17957e+08	1.43384e+08	133301283	1.12314e+08	1.23913e+08	1.21013e+08	119080100
Dehydroevodiamine	P5488		HMDB0250954	Organoheterocyclic compounds	Diazanaphthalenes	Benzodiazines	1.425	302.121	[M+H]+	C19H15N3O	Quinazolines	3.15336e+08	4.70159e+08	3.38631e+08	5.47111e+08	5.47377e+08	5.47311e+08	5.47266e+08
Dehydroeffusol	P4343		---	---	---	---	6.57	251.102	[M+H]+	C17H14O2	Phenanthrols	7.51993e+07	2.22837e+07	5.6924e+07	1.00861e+08	9.16545e+07	9.3956e+07	9.54903e+07
Dehydroeburicoic Acid Monoacetate	P8797		---	---	---	---	9.949	533.365	[2M+H]+	C33H50O4	Triterpenoids	2.95668e+07	1.8985e+07	2.04248e+07	1.82018e+07	2.23755e+07	2.13321e+07	2.06365e+07
DDAO	P3200		---	---	---	---	7.19	202.216	[M+H]+	C12H27NO	Long-chain alkyl amine oxides	4.38939e+08	1.41188e+08	2.65563e+08	3.28174e+08	3.88424e+08	3.73362e+08	3.6332e+08
Cytisine	P3854	C10763	---	---	---	---	1.344	229.067	[2M+H]+	C11H14N2O	Cytisine and derivatives	2.19497e+08	2.17856e+08	1.5838e+08	1.46247e+08	1.50451e+08	1.494e+08	1.487e+08
Crotonoside	P5083	C08432	HMDB0000403	Organoheterocyclic compounds	Imidazopyrimidines	Purines and purine derivatives	6.316	284.102	[M+H]+	C10H13N5O5	Purine nucleosides	1.317e+08	4.9297e+07	1.07926e+08	1.14002e+08	9.93368e+07	1.03003e+08	1.05447e+08
Cotoin	P4686		---	---	---	---	4.307	267.058	[M+Na]+	C14H12O4	Benzophenones	687211	539735	418820	1.53628e+08	1.43998e+08	1.46405e+08	148010381
Cortisone	P6537	C00762	HMDB0002802	Lipids and lipid-like molecules	Steroids and steroid derivatives	Hydroxysteroids	6.914	361.199	[M+H]+	C21H28O5	21-hydroxysteroids	3.91715e+07	1.65641e+07	3.76918e+07	1.3694e+07	1.07558e+07	1.14903e+07	1.19801e+07
Conessine	P6741	C06545	HMDB0250436	Lipids and lipid-like molecules	Steroids and steroid derivatives	Steroidal alkaloids	9.703	374.361	[M+H]+	C24H40N2	Conanine-type alkaloids	3.14735e+07	1.64849e+07	1.42613e+07	7.91216e+07	6.78653e+07	7.06794e+07	72555423
Cocamidopropylbetaine	P6267		---	---	---	---	7.901	343.295	[M+H]+	C19H38N2O3	Alpha amino acids	4.29273e+07	2.70181e+07	2.79146e+07	4.30638e+07	5.36283e+07	5.09872e+07	4.92264e+07
Citalopram	P5941	C07572	HMDB0005038	Benzenoids	Benzene and substituted derivatives	Phenylbutylamines	5.052	325.175	[M+H]+	C20H22BrFN2O		3.00682e+08	1.99575e+08	231266607	2.82322e+07	3.27203e+07	3.15983e+07	3.08503e+07
cis-Aconitate	P2921	C00417	HMDB0000958	Organic acids and derivatives	Carboxylic acids and derivatives	Tricarboxylic acids and derivatives	5.205	192.051	[M+K]+	C6H6O6	Tricarboxylic acids and derivatives	6.2782e+07	162712469	1.39141e+08	2.37831e+07	5.74016e+07	4.89969e+07	4.33939e+07
cis,cis-Muconate	P1592	C02480	HMDB0006331	Lipids and lipid-like molecules	Fatty Acyls	Fatty acids and conjugates	1.343	143.031	[M+H]+	C6H6O4	Medium-chain fatty acids	4814440247	6034402091	5268163426	4287822565	4802589731	4673897940	4588103412
Cinnamyl Alcohol	P1372	C02394	HMDB0029697	Phenylpropanoids and polyketides	Cinnamyl alcohols	---	9.085	135.08	[M+H]+	C9H10O	Cinnamyl alcohols	1.07624e+08	1.85776e+08	1.88067e+08	2.71259e+08	280233407	2.7799e+08	2.76494e+08
Cinnamoylcholine	P3969		---	---	---	---	5.138	234.149	[M+ACN+H]+	C14H20NO2	Cinnamic acid esters	217466411	1.30117e+08	2.71908e+08	4.02649e+08	4.03935e+08	4.03613e+08	4.03399e+08
Choline	P571	C00114	HMDB0000097	Organic nitrogen compounds	Organonitrogen compounds	Quaternary ammonium salts	1.392	104.107	[M]+	C5H14NO	Cholines	23821856805	24994265410	19884606487	33743883830	35810995445	35294217541	34949698939
Cholesterol	P6660	C00187	HMDB0000067	Lipids and lipid-like molecules	Steroids and steroid derivatives	Cholestane steroids	13.233	369.351	[M+H-H2O]-	C27H46O	Cholesterols and derivatives	4.56204e+08	5.68359e+08	7.63322e+07	2.9957e+07	6.21338e+07	5.40896e+07	4.87268e+07
Cholestane	P7035	C19661	HMDB0250162	Lipids and lipid-like molecules	Steroids and steroid derivatives	Cholestane steroids	11.776	395.363	[M+H]+	C27H48	Cholestane steroids	5.9471e+06	7.95913e+06	7.07024e+06	1.50225e+07	1.81687e+07	1.73821e+07	1.68578e+07
Carylophyllene Oxide	P3312		---	---	---	---	8.748	207.173	[M+H]+	C14H22O	Epoxides	8.7798e+06	7.88639e+06	1.28992e+07	1.79651e+07	1.72574e+07	1.74343e+07	1.75523e+07
Canarione	P4829		---	---	---	---	7.539	273.032	[M+H]+	C14H8O6		1.78743e+08	1.12307e+08	1.99203e+08	4.7548e+07	4.54902e+07	4.60047e+07	4.63476e+07
Caffeoyl Putrescin	P4349		---	---	---	---	6.65	251.139	[M+H-H2O]+	C13H18N2O3	Caffeic acid and derivatives	7.69259e+07	4.49475e+07	9.28763e+07	1.10657e+08	8.09159e+07	8.83512e+07	9.33081e+07
C17-Sphinganine	P5197		---	---	---	---	8.136	288.289	[M+H]+	C17H37NO2	1,2-aminoalcohols	3120267878	3896436842	4268848892	4797892102	5423895909	5267394957	5163060990
Butyryl Carnitine	P3922		---	---	---	---	5.192	232.154	[M+H]+	C11H21NO4	Acyl carnitines	7.61402e+08	6.26758e+08	5.19236e+08	6.38171e+08	277791110	3.67886e+08	4.27949e+08
Bullatine B	P7830		---	---	---	---	5.724	460.268	[M+Na]+	C24H39NO6	Aconitane-type diterpenoid alkaloids	1.22103e+08	1.76731e+08	143431236	1.10291e+08	5.43201e+07	6.83128e+07	7.76412e+07
Bovinocidin	P982		HMDB0034259	Organic 1,3-dipolar compounds	Allyl-type 1,3-dipolar organic compounds	Organic nitro compounds	10.673	120.025	[M+2H]2+	C3H5NO4	C-nitro compounds	1.68818e+06	486549	490374	3.20405e+07	372218	8.28928e+06	1.35673e+07
Biuret	P554	C06555	HMDB0249282	Organic acids and derivatives	Carboximidic acids and derivatives	Carboximidic acids	2.249	104.053	[M+NH4]+	C2H5N3O2	Isoureas	2868019428	1261589087	2486134018	2789041461	2098532757	2271159933	2386244717
Biotin	P4219	C00120	HMDB0000030	Organoheterocyclic compounds	Biotin and derivatives	---	5.696	245.095	[M+H]+	C10H16N2O3S	Biotin and derivatives	8.76374e+07	9.51865e+07	5.45348e+07	1.08351e+08	6.17773e+07	7.34207e+07	8.1183e+07
Beta-Sitosterol	P7063	C01753	HMDB0000852	Lipids and lipid-like molecules	Steroids and steroid derivatives	Stigmastanes and derivatives	11.145	397.378	[M+H]+	C29H50O	Stigmastanes and derivatives	3.19377e+06	6.826e+06	1.20465e+07	346873	668551	588131	534518
Beta-N-Methylaminoalanine	P967		---	---	---	---	9.085	119.085	[M+H]+	C4H10N2O2	Alpha amino acids	1.94697e+08	3.44219e+08	3.43767e+08	5.16472e+08	494335100	4.99869e+08	503558992
Betaine	P1507	C00719	HMDB0000043	Organic acids and derivatives	Carboxylic acids and derivatives	Amino acids, peptides, and analogues	1.437	140.068	[M+Na]+	C5H11NO2	Alpha amino acids	3823847418	5904908230	4454285019	2765601323	3146631667	3051374081	2987869023
Berberine Sulfate	P7523		---	---	---	---	5.01	434.096	[2M+H]+	C20H20NO8S	Protoberberine alkaloids and derivatives	195433140	2.17475e+08	1.94202e+08	5.633e+07	8.76987e+07	7.98565e+07	7.46284e+07
Berberine Hydrochloride	P6706		---	---	---	---	5.094	372.101	[M+Na]+	C20H18ClNO4	Protoberberine alkaloids and derivatives	5.87283e+07	8.42597e+06	2.09922e+07	135885261	8.4405e+07	9.72751e+07	1.05855e+08
Berberine	P6165	C00757	HMDB0003409	Alkaloids and derivatives	Protoberberine alkaloids and derivatives	---	10.787	337.199	[2M+H]+	[C20H18NO4]+	Protoberberine alkaloids and derivatives	8.15038e+07	4.04548e+07	6.767e+07	6.63377e+07	6.35114e+07	6.4218e+07	6.4689e+07
Benzyl Isothiocyanate	P2802	C03098	HMDB0033969	Benzenoids	Benzene and substituted derivatives	---	5.277	187.987	[M+H]+	C8H7NS	Benzene and substituted derivatives	124791221	1.56076e+08	6.82487e+07	157590293	1.01767e+08	1.15723e+08	1.25027e+08
Benzoic Acid	P1048	C00180	HMDB0001870	Benzenoids	Benzene and substituted derivatives	Benzoic acids and derivatives	1.873	123.044	[M+H]+	C7H6O2	Benzoic acids	3009014285	6129889284	2498699200	3752665321	2665652015	2937405342	3118574226
Benoxinate Hydrochloride	P5636		HMDB0015029	Benzenoids	Benzene and substituted derivatives	Benzoic acids and derivatives	6.69	309.226	[M+H]+	C17H29ClN2O3		3.11111e+07	11260419	2.33018e+07	3.23818e+08	272167706	2.8508e+08	2.93689e+08
Beclomethasone	P7225	C06842	HMDB0248924	Lipids and lipid-like molecules	Steroids and steroid derivatives	Hydroxysteroids	5.337	409.17	[M+H]+	C22H29ClO5	21-hydroxysteroids	5.42791e+07	5.59259e+07	1.32438e+07	7.57043e+07	4.18876e+07	5.03418e+07	5.59779e+07
Barceloneic Acid A	P6173		---	---	---	---	4.772	338.117	[M+Na]+	C16H16O7	Diphenylethers	4.7534e+08	5.79497e+08	4.81602e+08	1095586687	1237870930	1202299869	1178585828
Asulam	P3895	C18350	HMDB0248680	Benzenoids	Benzene and substituted derivatives	Benzenesulfonamides	1.347	231.047	[M+NH4]+	C8H10N2O4S	Aminobenzenesulfonamides	1.47797e+08	1.54159e+08	8.5808e+07	113056341	8.42531e+07	9.14539e+07	9.62545e+07
Ascorbic Acid	P2498	C00072	HMDB0000044	Organoheterocyclic compounds	Dihydrofurans	Furanones	6.009	177.04	[M+H]+	C6H8O6	Butenolides	213859495	2.17521e+08	1.74598e+08	334144879	203134724	2.35887e+08	2.57722e+08
Artemether	P5883		HMDB0015643	Lipids and lipid-like molecules	Prenol lipids	Sesquiterpenoids	5.72	321.165	[M+H]+	C16H26O5	Artemisinins	1.69108e+08	1.2133e+08	1.02925e+08	4.27699e+08	2.50495e+08	2.94796e+08	3.2433e+08
Arginine	P2457	C02385	HMDB0000517	Organic acids and derivatives	Carboxylic acids and derivatives	Amino acids, peptides, and analogues	1.404	175.119	[M+H]+	C6H14N4O2	L-alpha-amino acids	13764668334	10970815387	10019178647	20119051013	21793362919	21374784942	21095732958
Aphyllic Acid	P5559		---	---	---	---	5.037	305.164	[M+ACN+H]2+	C15H26N2O2	Delta amino acids and derivatives	2.33212e+07	1.62738e+07	1.74273e+07	9.36546e+07	109587819	1.05605e+08	1.02949e+08
Angoletin	P5469		---	---	---	---	10.335	301.14	[M+H]+	C18H20O4		4.41274e+07	2.02258e+07	5.52378e+07	1.28135e+08	1.24523e+08	1.25426e+08	1.26028e+08
Angolensin	P5331		---	---	---	---	5.201	295.092	[M+Na]+	C16H16O4	Alpha-methyldeoxybenzoin flavonoids	1781082596	1797371434	1363423809	1687752197	8.85982e+08	1086424698	1220053031
Amoxicillin Crystalline	P6605		---	---	---	---	1.953	366.114	[M+H]+	C16H19N3O5S		8.61911e+07	1.31329e+08	108525041	3.90003e+07	1.71771e+08	1.38578e+08	1.1645e+08
Amisulpride	P6672		HMDB0015633	Benzenoids	Benzene and substituted derivatives	Benzoic acids and derivatives	7.479	370.172	[M+H]+	C17H27N3O4S	Aminobenzamides	1.52523e+07	2.21591e+06	5.77623e+06	1.81802e+07	5.5311e+07	4.60283e+07	3.98398e+07
Aminobenzoyl-Glutamate	P4695		---	---	---	---	5.139	267.096	[M+H]+	C12H14N2O5	Amino acids	2.14436e+08	2.99723e+08	3.68057e+08	1.16018e+08	1.03725e+08	1.06798e+08	1.08847e+08
Alverine Citrate	P5047		HMDB0015554	Benzenoids	Benzene and substituted derivatives	Phenylpropylamines	11.667	282.22	[M+H]+	C26H35NO7	Phenylpropylamines	1.02916e+08	9.82909e+07	107930470	2.06386e+08	2.14691e+08	2.12615e+08	2.11231e+08
Alpha-Oxo-1H-Indole-3-Propanoic Acid	P3778		HMDB0060484	Organoheterocyclic compounds	Indoles and derivatives	Indolyl carboxylic acids and derivatives	1.571	226.045	[M+Na]+	C11H9NO3	Indolyl carboxylic acids and derivatives	1.65845e+07	1.36629e+06	1.92765e+06	1666219444	1578038097	1600083434	1614780325
Alpha-Methylene-Gamma-Butyrolactone	P458		HMDB0246945	Organoheterocyclic compounds	Lactones	Gamma butyrolactones	5.034	99.0444	[M+H]+	C5H6O2	Gamma butyrolactones	6.92197e+08	2132528372	1706917581	2041610412	1114957388	1346620644	1501062815
Alliin	P2509	C08265	HMDB0301759	Organic acids and derivatives	Carboxylic acids and derivatives	Amino acids, peptides, and analogues	1.36	178.047	[M+H]+	C6H11NO3S	L-alpha-amino acids	2.18752e+08	1.46215e+08	1.39328e+08	1.52068e+08	1.78258e+08	1.7171e+08	1.67345e+08
Alanine	P262	C01401	HMDB0062251	Organic acids and derivatives	Carboxylic acids and derivatives	Amino acids, peptides, and analogues	1.554	90.0553	[M+H]+	C3H7NO2	Alanine and derivatives	2.03092e+08	3.37744e+08	1.58715e+08	1.53261e+08	1.91172e+08	1.81694e+08	1.75376e+08
Agelasine	P7991		---	---	---	---	5.877	475.324	[M+Na]+	C26H40ClN5	Colensane and clerodane diterpenoids	2.10896e+08	2.0725e+08	1.44045e+08	144735105	5.85801e+07	8.01188e+07	9.4478e+07
Aflatoxin B1	P5707	C06800	HMDB0006552	Phenylpropanoids and polyketides	Coumarins and derivatives	Furanocoumarins	1.411	313.073	[M+H]+	C17H12O6	Difurocoumarocyclopentenones	2.40068e+08	2.95788e+08	2.53024e+08	8.48276e+07	1.04805e+08	9.98107e+07	9.64811e+07
Adenine	P1382	C00147	HMDB0000034	Organoheterocyclic compounds	Imidazopyrimidines	Purines and purine derivatives	2.222	136.062	[M+H]+	C5H5N5	6-aminopurines	1.03822e+08	1.24845e+08	5.05089e+07	2343801219	2580090732	2521018354	2481636768
Actiphenol	P5395		---	---	---	---	7.309	298.103	[M+Na]+	C15H17NO4	Alkyl-phenylketones	5.47406e+07	1.46339e+07	3.33882e+07	1.51344e+07	1.54205e+07	1.5349e+07	1.53013e+07
Acetylproline	P1997		HMDB0094701	Organic acids and derivatives	Carboxylic acids and derivatives	Amino acids, peptides, and analogues	13.847	158.081	[M+ACN+H]+	C7H11NO3	Amino acids	2244889251	2398633321	2689185986	7.83642e+08	2228930040	1867607931	1626726524
Acetoacetate	P538	C00164	HMDB0304256	Organic acids and derivatives	Keto acids and derivatives	Short-chain keto acids and derivatives	1.716	103.039	[M+H]+	C4H6O3	Short-chain keto acids and derivatives	7719934215	7282061162	13185843659	5019500837	8534796416	7655972521	7070089925
9-Methanesulfinylnonanoic Acid	P3217		---	---	---	---	1.94	203.113	[M+K]+	C10H20O3S	Glucosinolate breakdown metabolites	1033363505	5.66777e+08	7.01537e+08	4.30775e+08	5.75932e+08	5.39643e+08	5.1545e+08
9,13-Epoxy-3,15,16,18-Labdanetetrol	P6477		---	---	---	---	10.035	357.26	[M+K]+	C20H36O5	Diterpenoids	1.07322e+07	7.04053e+06	8.56936e+06	3.34837e+07	2.0046e+07	2.34054e+07	2.5645e+07
7-Oxocholesterol	P7123		HMDB0000501	Lipids and lipid-like molecules	Steroids and steroid derivatives	Cholestane steroids	10.287	401.34	[M+H]+	C27H44O2	Cholesterols and derivatives	0	175000	0	782721	1.39244e+07	1.0639e+07	8.44871e+06
7-Methoxy-2-Phenyl-4H-Chromen-4-One	P4877		---	---	---	---	6.227	275.073	[M+Na]+	C16H12O3	7-O-methylated flavonoids	3.22867e+07	1.74559e+07	3.04108e+07	3.07029e+07	4.33648e+07	4.01993e+07	3.8089e+07
7-Methoxy-2-Methyl-3-Phenyl-4H-Chromen-4-One	P5212		---	---	---	---	5.107	289.078	[M+Na]+	C17H14O3	7-O-methylisoflavones	1.08485e+08	8.13631e+07	9.83757e+07	5.21833e+07	3.61557e+07	4.01626e+07	4.28339e+07
7-Hydroxy-6-Methoxy-8-(3-Methylbut-2-Enyl)Chromen-2-One	P5063		---	---	---	---	8.426	283.094	[M+H]+	C15H16O4	7-hydroxycoumarins	2.24454e+07	6.33189e+07	5.96047e+07	5.63096e+07	5.1754e+07	5.28929e+07	5.36522e+07
7,8-Dimethylalloxazine	P4171	C01727	HMDB0254199	Organoheterocyclic compounds	Pteridines and derivatives	Alloxazines and isoalloxazines	6.492	243.087	[M+H]+	C12H10N4O2	Flavins	1198212398	3.94161e+08	1329544722	1072337715	9.19343e+08	9.57591e+08	983090631
6-Isopropoxynicotinic Acid	P3234		---	---	---	---	3.76	204.063	[M+H]+	C9H11NO3	Pyridinecarboxylic acids	3199154036	3761112043	4216933983	3156893126	3106849071	3119360085	3127700761
6-Ethyl-3-(4-Isopropoxyphenyl)-4-Oxo-4H-Chromen-7-Yl Acetate	P6947		---	---	---	---	5.227	389.13	[M+Na]+	C22H22O5	Isoflavones	7.0233e+07	3.22687e+07	6.16385e+07	2.03896e+08	1.09223e+08	132891745	1.48671e+08
6,7-Dimethoxy-1-Phenyl-3,4-Dihydro-Isoquinoline	P4711		---	---	---	---	5.143	268.133	[M+H]+	C17H17NO2	Dihydroisoquinolines	9.97767e+07	8.04389e+07	1.14985e+08	2.13336e+08	4.05189e+08	3.57226e+08	3.25251e+08
6,7-Dihydroxybenzofuran-3(2H)-One	P2213		---	---	---	---	1.471	167.031	[M+H-H2O]+	C8H6O4	Benzofurans	8.57008e+08	1941578605	1343881419	4.80354e+08	5.40235e+08	5.25264e+08	5.15284e+08
5-O-Methylvisammioside	P7752		---	---	---	---	9.085	453.166	[M+H]+	C22H28O10	Furanochromones	9.38067e+07	1.45615e+08	2.15132e+08	2.70435e+08	3.65726e+08	3.41903e+08	3.26021e+08
5'-Methylthioadenosine	P5393	C00170	HMDB0001173	Nucleosides, nucleotides, and analogues	5'-deoxyribonucleosides	5'-deoxy-5'-thionucleosides	5.202	298.096	[M+H]+	C11H15N5O3S	5'-deoxy-5'-thionucleosides	3.58456e+07	3.30645e+07	2.49727e+07	5.04323e+07	2.3995e+07	3.06043e+07	3.50105e+07
5-Hydroxyindole-3-Acetic Acid	P2923		HMDB0000763	Organoheterocyclic compounds	Indoles and derivatives	Indolyl carboxylic acids and derivatives	5.088	192.065	[M+H]+	C10H9NO3	Indole-3-acetic acid derivatives	1.3856e+08	184435177	1.77106e+08	1.17035e+08	1.17624e+08	117476854	1.17379e+08
5-Fluro-2-Pyrimidone	P866		---	---	---	---	1.372	115.037	[M+H]+	C4H3FN2O	Halopyrimidines	4.19682e+08	5.4045e+08	4.63047e+08	3.12666e+08	3.77506e+08	3.61296e+08	3.50489e+08
5-[5-(3,5-Dihydroxydecanoyloxy)-3-Hydroxydecanoyl]Oxy-3-Hydroxydecanoic Acid	P9341		---	---	---	---	9.921	577.391	[M+Na]+	C30H56O10	Tricarboxylic acids and derivatives	2.03442e+07	1.34567e+07	1.2261e+07	1.087e+07	1.15925e+07	1.14119e+07	1.12914e+07
5-[(Z)-14-(3,5-Dihydroxyphenyl)Tetradec-8-Enyl]Benzene-1,3-Diol	P7275		---	---	---	---	11.724	413.323	[M+Na]+	C26H36O4	Resorcinols	337046	0	299652	279447	600257	520055	466586
5,7-Dimethoxy-2-Phenyl-4H-Chromen-4-One	P5554		---	---	---	---	5.06	305.085	[M+Na]+	C17H14O4	7-O-methylated flavonoids	1.55881e+07	9.0429e+06	1.29851e+07	2.49689e+07	2.01433e+07	2.13497e+07	2.21539e+07
5,7-Dihydroxy-3,6-Dimethoxy-2-(3,4,5-Trimethoxyphenyl)-4H-Chromen-4-One	P7427		---	---	---	---	1.734	427.095	[2M+H]+	C20H20O9	6-O-methylated flavonoids	9.96867e+07	1.01705e+08	1.0218e+08	2.11993e+08	1.60513e+08	1.73383e+08	1.81963e+08
5,7-Dihydroxy-2-(4-Hydroxyphenyl)-2,3-Dihydro-4H-Chromen-4-One	P4830		---	---	---	---	6.569	273.083	[M+H]+	C15H12O5	Flavanones	3.12727e+07	1.69264e+06	1.83824e+07	3.61412e+07	5.07237e+07	4.70781e+07	4.46477e+07
5-(8,11,14-Pentadecatrienyl)Resorcinol	P6628		HMDB0038533	Benzenoids	Phenols	Benzenediols	6.521	367.134	[M+H]+	C21H30O2	Resorcinols	3.65776e+07	1.28087e+07	4.1592e+07	1.16405e+08	1.0691e+08	1.09284e+08	1.10866e+08
4-Ureidobutanoic Acid	P2268		---	---	---	---	1.916	169.058	[M+Na]+	C5H10N2O3	Gamma amino acids and derivatives	5.72671e+08	7.46629e+08	8.60999e+08	4.82805e+08	496749756	4.93264e+08	4.9094e+08
4-Pregnene-3,20-dione	P5760	C00410	HMDB0001830	Lipids and lipid-like molecules	Steroids and steroid derivatives	Pregnane steroids	9.672	315.231	[M+H]+	C21H30O2	Gluco/mineralocorticoids, progestogins and derivatives	4.53949e+06	2.2688e+06	3.86929e+06	6.66103e+07	6.10585e+07	6.24464e+07	6.33717e+07
4-Methyl-5-Thiazoleethanol	P1630		HMDB0032985	Organoheterocyclic compounds	Azoles	Thiazoles	1.533	144.047	[M+Na]+	C6H9NOS	4,5-disubstituted thiazoles	1388934982	1553550779	1359813556	1640107385	1840742303	1790583573	1757144420
4-Methoxy-9H-Xanthen-9-One	P3815		---	---	---	---	5.281	227.078	[M+Na]+	C14H10O3	Xanthones	5.812e+08	4.25348e+08	3.59686e+08	7.87418e+08	5.04724e+08	5.75398e+08	6.22513e+08
4-Hydroxybenzoylcholine	P3733		HMDB0029559	Benzenoids	Benzene and substituted derivatives	Benzoic acids and derivatives	4.99	224.128	[M]+	C12H18NO3	Benzoic acid esters	582212330	6.99268e+08	5.82602e+08	3.72142e+08	4.673e+08	4.4351e+08	4.27651e+08
4-Hydroxybenzotriazole	P1380		HMDB0014917	Organoheterocyclic compounds	Diazanaphthalenes	Naphthyridines	1.407	136.048	[M+NH4]+	C6H5N3O	Benzotriazoles	2.34675e+08	3.43762e+08	2.56915e+08	1.31859e+08	1.6167e+08	154216980	1.49249e+08
4-Hydroxy-4-(Pyridin-2-Yl)Butan-2-One	P2808		---	---	---	---	5.279	188.07	[M+H]+	C9H11NO2	Pyridines and derivatives	66801096586	65353685381	34708662553	70619288630	50086528025	55219718176	58641844944
4-Hydroxy-3,5-Dimethoxybenzoic Acid	P3088		HMDB0002085	Benzenoids	Benzene and substituted derivatives	Benzoic acids and derivatives	1.341	199.057	[M+H]+	C9H10O5	Gallic acid and derivatives	3.79781e+08	3.95078e+08	3.39203e+08	2.06695e+08	2.39661e+08	2.31419e+08	2.25925e+08
4H-Cyclopenta[Def]Phenanthrene-4-One	P3259		HMDB0014917	Organoheterocyclic compounds	Diazanaphthalenes	Naphthyridines	4.086	205.064	[M+H]+	C15H8O		3.78226e+07	3.87876e+07	5.5236e+07	2401303834	1176448279	1482662168	1686804760
4-Chloroaniline	P1155	C14450	HMDB0246391	Benzenoids	Benzene and substituted derivatives	Aniline and substituted anilines	1.072	128.019	[M+2H]2+	C6H6ClN	Aniline and substituted anilines	2188575523	2547142976	1175405729	3055543225	2502986896	2641125979	2733218700
4-[(E)-3-(3,4-Dihydroxyphenyl)Prop-2-Enoyl]Oxy-3-Hydroxy-3,4-Dihydro-2H-Pyran-2,6-Dicarboxylic Acid	P6882		---	---	---	---	5.031	384.087	[M+Na]+	C16H14O10	Coumaric acids and derivatives	7.49628e+07	6.62582e+07	5.55137e+07	8.03841e+07	9.88162e+07	9.42082e+07	9.11362e+07
4,20-Dideoxyphorbol Diester From Euphorbia	P8616		---	---	---	---	9.973	521.25	[M+H]+	C29H38O7	Tigliane and ingenane diterpenoids	1.54591e+07	8.51762e+06	1.36852e+07	1.3691e+07	9.3358e+06	1.04246e+07	1.11505e+07
4-(Cytisin-12-Amido)-Benzoic Acid	P6432		---	---	---	---	5.76	354.144	[M+H]+	C19H19N3O4	Cytisine and derivatives	8.34869e+07	8.83136e+07	7.78914e+07	5.05157e+07	3.01175e+07	3.5217e+07	3.86167e+07
3-Phenyllactic Acid	P2701		HMDB0000779	Phenylpropanoids and polyketides	Phenylpropanoic acids	---	5.136	184.096	[M+H-H2O]+	C9H10O3	Phenylpropanoic acids	3.89947e+08	5.51529e+08	523826249	3.9072e+08	4.43922e+08	4.30621e+08	4.21754e+08
3-Indoleacetic Acid	P2477	C00954	HMDB0000197	Organoheterocyclic compounds	Indoles and derivatives	Indolyl carboxylic acids and derivatives	6.768	176.07	[M+H]+	C10H9NO2	Indole-3-acetic acid derivatives	1.411e+08	1.3967e+08	1.30733e+08	128194942	1.40371e+08	1.37327e+08	1.35298e+08
3-Hydroxy-1,2-Dimethylpyridin-4(1H)-One	P2097		---	---	---	---	1.413	162.05	[M+Na]+	C7H9NO2	Methylpyridines	1812674117	1881663221	1731090953	1307460267	1382293835	1363585443	1351113181
3-Acetylindole	P2063		---	---	---	---	5.042	160.075	[M+H]+	C10H9NO	Indoles	4636729466	4528416946	4911856330	1652497476	2013421036	1923190146	1863036219
3,4-Dimethoxycinnamic Acid	P3894		HMDB0034315	Phenylpropanoids and polyketides	Cinnamic acids and derivatives	Hydroxycinnamic acids and derivatives	1.07	231.034	[M+NH4]+	C11H12O4	Coumaric acids and derivatives	1.8748e+08	3.37162e+08	2.65428e+08	3.29498e+07	2.61843e+08	2.04619e+08	1.66471e+08
3,4-Dihydrocoumarin	P1773	C02274	HMDB0036626	Phenylpropanoids and polyketides	3,4-dihydrocoumarins	---	5.101	149.06	[M+H]+	C9H8O2	3,4-dihydrocoumarins	8.45561e+08	8.64401e+08	7.90949e+08	7.51342e+08	8.37509e+08	815966998	8.01606e+08
3,4,5-Trimethoxycinnamic Acid	P4563		HMDB0002511	Phenylpropanoids and polyketides	Cinnamic acids and derivatives	Hydroxycinnamic acids and derivatives	5.495	261.069	[M+H]+	C12H14O5	Coumaric acids and derivatives	1.02863e+08	1.23796e+08	7.97188e+07	1.75389e+08	1.11574e+08	1.27528e+08	1.38164e+08
3-(4-Methoxy-Phenyl)-Isochromen-1-One	P4386		---	---	---	---	6.187	253.092	[M+H]+	C16H12O3	Isocoumarins and derivatives	1.65382e+07	1.78228e+07	1.38601e+07	3.78665e+07	1.76609e+07	2.27123e+07	2.60799e+07
3-(3,4,5-Trimethoxyphenyl)Propanoic Acid	P4498		HMDB0030254	Phenylpropanoids and polyketides	Phenylpropanoic acids	---	5.009	258.133	[M+H-H2O]+	C12H16O5	Phenylpropanoic acids	3.09628e+08	3.04915e+08	2.78628e+08	6.69842e+08	6.82879e+08	6.7962e+08	6.77447e+08
3-(2-Hydroxyethyl)Quinazolin-4(3H)-One	P2905		---	---	---	---	1.16	191.076	[M+H]+	C10H10N2O2	Quinazolines	5.03986e+08	452063952	345464793	3.61616e+08	3.72915e+08	3.70091e+08	368207252
2-Phenylacetamide	P1392	C02505	HMDB0010715	Benzenoids	Benzene and substituted derivatives	Phenylacetamides	3.86	136.076	[M+H]+	C8H9NO	Phenylacetamides	38622685769	35966208431	39964597205	42287863161	31489556587	34189133231	35988850993
2'-O-Methylguanosine	P5396		---	---	---	---	5.039	298.113	[M+H]+	C11H15N5O5	Purine nucleosides	1.33867e+08	1.55803e+08	1.34017e+08	1.30248e+08	1.36027e+08	1.34582e+08	1.33619e+08
2-Octyl-3(2H)-Isothiazolone	P3472		---	---	---	---	1.41	214.13	[M+NH4]+	C11H19NOS	Thiazoles	6.06296e+08	3.3244e+08	3.45832e+08	8.84561e+07	1.19761e+08	1.11935e+08	1.06717e+08
2-Methylpyrrolidine	P176		---	---	---	---	2.838	86.0968	[M+H]+	C5H11N	Pyrrolidines	25139151914	23648874175	48076535869	28322296159	60964911575	52804257721	47363821818
2-Methylindole	P1294		HMDB0245234	Organoheterocyclic compounds	Indoles and derivatives	Indoles	5.278	132.081	[M+H]+	C9H9N	Indoles	1315408697	1265024365	7.69594e+08	1419129388	1044553558	1138197516	1200626821
2-Hydroxy-4-(2-Hydroxyethyl)Phenyl Beta-D-Glucopyranoside	P6192		---	---	---	---	5.722	339.103	[M+H]+	C14H20O8	Phenolic glycosides	6.67537e+07	7.40025e+07	5.43796e+07	1.68163e+08	9.05018e+07	1.09917e+08	1.2286e+08
2'-Deoxyadenosine 5'-Diphosphate	P7257	C00206	HMDB0001508	Nucleosides, nucleotides, and analogues	Purine nucleotides	Purine deoxyribonucleotides	1.461	412.035	[M+NH4]+	C10H15N5O9P2	Purine 2'-deoxyribonucleoside diphosphates	3.49501e+08	3.76539e+08	3.09219e+08	1.04048e+07	1.0573e+08	8.1899e+07	6.60114e+07
2-Decyl-3-Hydroxypentanedioic Acid	P5669		---	---	---	---	8.665	311.184	[M+H]+	C15H28O5	Long-chain fatty acids	7.34937e+07	1.5186e+08	1.50487e+08	167834220	1.83749e+08	1.7977e+08	1.77118e+08
2-Aminophenol	P718	C01987	---	---	---	---	13.854	110.06	[M+H]+	C6H7NO	Aniline and substituted anilines	1477094558	1851831599	1897469620	8.14059e+08	2468428375	2054836117	1779107945
2-Acetoxy-4-Pentadecylbenzoic Acid	P7272		---	---	---	---	13.121	413.265	[M+Na]+	C24H38O4	Acylsalicylic acids	2.36197e+07	2.43586e+07	3.41275e+07	9.79546e+07	1.00947e+08	1.00199e+08	9.96999e+07
2-[(2E)-3,7-Dimethylocta-2,6-Dienyl]-3-Methoxy-5-(2-Phenylethyl)Phenol	P6593		---	---	---	---	6.96	365.242	[M+NH4]+	C25H32O2	Stilbenes	1.9918e+07	6.89607e+06	9.65491e+06	4.97182e+07	5.69011e+07	5.51054e+07	5.39082e+07
2,3-Dihydroxypropyl Hexadecanoate	P6346		HMDB0245964	Lipids and lipid-like molecules	Glycerolipids	Monoradylglycerols	7.621	348.31	[M+H]+	C19H38O4	1-monoacylglycerols	390256	305386	1.69832e+06	1.71743e+07	1.70172e+07	1.70565e+07	1.70827e+07
2',2'-Difluoro-2'-Deoxyuridine	P4649		HMDB0060727	Nucleosides, nucleotides, and analogues	Pyrimidine nucleosides	Pyrimidine 2'-deoxyribonucleosides	6.49	265.069	[M+Na]+	C9H10F2N2O5	Pyrimidine 2'-deoxyribonucleosides	1.80352e+08	3.27212e+07	1.44653e+08	1.38001e+08	9.60563e+07	1.06542e+08	1.13533e+08
2-(Hydroxymethyl)-5-Methoxy-4H-Pyran-4-One	P1982		---	---	---	---	1.342	157.047	[M+H]+	C7H8O4	Pyranones and derivatives	4.67405e+08	6.21246e+08	4.94364e+08	3.16601e+08	3.63691e+08	3.51918e+08	344069884
2-(Hydroxymethyl)-4(3H)-Quinazolinone	P2499		---	---	---	---	1.16	177.061	[M+H]+	C9H8N2O2	Quinazolines	1.94737e+08	1.6659e+08	1.18216e+08	9.73968e+07	1.1134e+08	1.07854e+08	1.0553e+08
2-(7-Hydroxy-6-Methyloctyl)-2H-Furan-5-One	P4195		HMDB0030314	Hydrocarbons	Saturated hydrocarbons	Alkanes	7.418	244.19	[M+H]+	C13H22O3	Fatty alcohols	255950661	1.91553e+08	1.98947e+08	3.15402e+08	4.00027e+08	3.7887e+08	3.64766e+08
2-(4-Oxoquinazolin-3(4H)-Yl)Ethyl Isobutyrate	P4566		---	---	---	---	5.192	261.13	[M+H]+	C14H16N2O3	Quinazolines	1.42935e+08	1.10848e+08	4.50343e+07	1.29002e+08	4.53277e+07	6.62463e+07	8.0192e+07
2-(3,4-Dimethoxyphenyl)-7-Methoxy-4H-Chromen-4-One	P5709		---	---	---	---	5.201	313.103	[M+NH4]+	C18H16O5	7-O-methylated flavonoids	3.34263e+08	3.24869e+08	2.68582e+08	2.81469e+08	1.70858e+08	1.98511e+08	2.16946e+08
2-(2-Iodophenyl)-4,4-Dimethyl-4,5-Dihydrooxazole	P5483		---	---	---	---	7.793	301.996	[M+H]+	C11H12INO	Iodobenzenes	6.91556e+06	8.62109e+06	4.46796e+06	5.45603e+06	5.81731e+06	5.72699e+06	5.66678e+06
2-(1,2-Dihydroxypentyl)-4-Methoxy-2,3-Dihydropyran-6-One	P4282		---	---	---	---	5.006	248.149	[M+H]+	C11H18O5	Dihydropyranones	2.65305e+08	2.46566e+08	243613680	6.01043e+08	6.19922e+08	6.15202e+08	6.12056e+08
1-Palmitoyl-2-Oleoyl-Sn-Glycero-3-Phosphocholine	P10916		HMDB0243985	Lipids and lipid-like molecules	Glycerophospholipids	Glycerophosphocholines	10.754	760.585	[M+K]+	C42H82NO8P	Phosphatidylcholines	13617382008	23715641451	13579279161	4538272584	5097087810	4957384003	4864248132
1-Methylnicotinamide	P1421	C02918	HMDB0000699	Organoheterocyclic compounds	Pyridines and derivatives	Pyridinecarboxylic acids and derivatives	1.385	137.071	[M]+	C7H9N2O	Nicotinamides	1003342124	1284932548	7.91254e+08	636262694	6.8948e+08	6.76176e+08	6.67306e+08
1-Methyladenosine	P5037	C02494	HMDB0003331	Nucleosides, nucleotides, and analogues	Purine nucleosides	---	4.092	282.118	[M+H]+	C11H15N5O4	Purine nucleosides	8.32251e+07	6.4776e+07	7.61228e+07	8.58624e+06	9.87297e+07	7.61938e+07	6.11699e+07
1-Hydroxypyrene	P3606	C14519	HMDB0013139	Benzenoids	Pyrenes	---	1.374	219.082	[M+H]+	C16H10O	Pyrenes	1117038937	9.73081e+08	8.07599e+08	8.46237e+08	9.30864e+08	9.09707e+08	8.95603e+08
1-Hydroxymidazolam	P6239		HMDB0061089	Organoheterocyclic compounds	Benzodiazepines	1,4-benzodiazepines	6.146	342.085	[M+H]+	C18H13ClFN3O	Imidazo[1,5-a][1,4]benzodiazepines	7.94728e+08	8.68466e+08	8.17567e+08	5.10138e+08	3.59718e+08	3.97323e+08	4.22393e+08
1-Desoxymethylsphinganine	P5099		---	---	---	---	12.728	284.293	[M-H2O+H]+	C17H37NO	1,2-aminoalcohols	1.31006e+08	1.40635e+08	1.4041e+08	2.22608e+08	2.45788e+08	2.39993e+08	2.3613e+08
1-Benzylimidazole	P2039		HMDB0243836	Organoheterocyclic compounds	Azoles	Imidazoles	5.279	159.091	[M+ACN+H]+	C10H10N2	N-substituted imidazoles	2052072524	2111531977	1180865468	2091765473	1631374833	1746472493	1823204266
19-Hydroxy-18-[3,4,5-Trihydroxy-6-(Hydroxymethyl)Oxan-2-Yl]Oxyicosanoic Acid	P8665		---	---	---	---	10.579	524.371	[M+H]+	C26H50O9	Saccharolipids	2.66938e+07	2.43838e+07	2.96437e+07	3.06916e+08	3.20236e+08	316905844	3.14686e+08
13-Acetyl-9-dihydrobaccatin III	P10033		---	---	---	---	4.882	631.265	[2M+H]+	C33H42O12	Taxanes and derivatives	3.90794e+06	1.53609e+07	3.81415e+07	8.43428e+07	1.15054e+08	1.07376e+08	1.02258e+08
12-Epinapelline	P6861		---	---	---	---	8.197	382.234	[M+H]+	C22H33NO3	Napelline-type diterpenoid alkaloids	9.6342e+06	1.50123e+07	1.41634e+07	1.82994e+07	1.80739e+07	1.81303e+07	1.81679e+07
1,3,8-Trihydroxy-6-(2-Hydroxypropyl)Anthracene-9,10-Dione	P6065		---	---	---	---	4.594	332.109	[M+H]+	C17H14O6	Hydroxyanthraquinones	4.83601e+07	8.47258e+07	1.23282e+08	4.47195e+08	2.46014e+08	2.96309e+08	3.29839e+08
1,2-Dihydroxyheptadec-16-Yn-4-Yl Acetate	P6358		---	---	---	---	1.389	349.23	[M+H]+	C19H34O4	Long-chain fatty alcohols	3.56304e+07	3.33689e+07	3.94644e+07	5.97608e+07	7.53014e+07	7.14162e+07	6.88262e+07
1,1'-Biisoquinoline	P4472		---	---	---	---	5.622	257.099	[M+Na]+	C18H12N2	Bipyridines and oligopyridines	5.59268e+08	5.44191e+08	3.55115e+08	3.03898e+08	2.91237e+08	2.94403e+08	2.96513e+08
1-(2,3-Dihydropyrrol-1-Yl)-8,9-Dihydroxy-2-Methyldecane-1,3-Dione	P4675		---	---	---	---	7.417	266.171	[M+Na]+	C15H25NO4	1,3-dicarbonyl compounds	319831641	1.09226e+08	1.70303e+08	255353703	5.36162e+08	4.6596e+08	4.19158e+08
1-(2,3,4-Trihydroxyphenyl)Ethanone	P2260		---	---	---	---	1.079	169.045	[2M+H]+	C8H8O4	Alkyl-phenylketones	2.23485e+08	1.7534e+08	1.82952e+08	1.0685e+08	1.29801e+08	1.24063e+08	1.20238e+08
[3-(13-Methyltetradecyl)-5-Sulfooxyphenyl] Hydrogen Sulfate	P8376		---	---	---	---	6.34	503.181	[M+H]+	C21H36O8S2	Phenylsulfates	4.74293e+08	1.84668e+08	5.07318e+08	5.74062e+07	5.25656e+07	5.37758e+07	5.45825e+07
(R)-Baclofen	P3469	C21605	---	---	---	---	1.888	214.064	[M+NH4]+	C10H12ClNO2	Gamma amino acids and derivatives	2.28294e+08	2.83159e+08	3.27495e+08	3.55218e+08	4.39933e+08	4.18755e+08	4.04635e+08
(R)-5,7-Dihydroxy-2-(4-Hydroxyphenyl)Chroman-4-One	P5327		---	---	---	---	5.046	295.06	[M+H]+	C15H12O5	Flavanones	1.12435e+08	1.50625e+08	129710220	1.87513e+08	2.07426e+08	2.02448e+08	1.99129e+08
(R)-4-Aminoisoxazolidin-3-One	P542		---	---	---	---	5.416	103.054	[M+H]+	C3H6N2O2	Alpha amino acids and derivatives	6.90055e+08	8.37796e+08	2.29251e+08	710806011	8.07867e+08	7.83601e+08	7.67425e+08
(E)-N-(4-Acetamidobutyl)-3-(4-Hydroxy-3-Methoxyphenyl)Prop-2-Enamide	P6014		---	---	---	---	7.514	329.148	[M+H]+	C16H22N2O4	Hydroxycinnamic acids and derivatives	3.27714e+07	1.20255e+07	2.42957e+07	3.51354e+06	2.59292e+06	2.82308e+06	2.97651e+06
(E)-5-Hydroxy-3-Isobutyl-6-(3-Methylbenzylidene)-1,6-Dihydropyrazin-2(3H)-One	P4838		---	---	---	---	6.269	273.167	[M+H]+	C16H20N2O2	Alpha amino acids and derivatives	5.21241e+07	3.50221e+07	5.57022e+07	2.48384e+08	2.71865e+08	2.65995e+08	262081479
(E)-1-(4-Methylquinazolin-2(1H)-Ylidene)Guanidine	P3187		---	---	---	---	5.137	202.107	[M+H]+	C10H11N5	Quinazolinamines	7.13333e+08	8.80339e+08	8.00647e+08	7.11013e+08	7.08593e+08	7.09198e+08	7.09602e+08
(9Z)-Octadecenoic acid	P5071	C00712	HMDB0000207	Lipids and lipid-like molecules	Fatty Acyls	Fatty acids and conjugates	10.404	283.262	[M+H]+	C18H34O2	Long-chain fatty acids	1.1754e+08	7.58171e+07	8.96357e+07	9.6309e+07	9.23544e+07	9.3343e+07	9.40022e+07
(7R,8R)-7,8-Dihydroxy-3,5,7-Trimethyl-7,8-Dihydro-6H-Isochromen-6-One	P3261		---	---	---	---	10.338	205.085	[M+H-H2O]+	C12H14O4	Azaphilones	6.07105e+08	3.13105e+08	1124935239	2054768410	1961606828	1984897224	2000424154
(3R,4S)-4,6,8-Trihydroxy-7-Methoxy-3-Methyl-3,4-Dihydroisochromen-1-One	P4119		---	---	---	---	1.343	241.068	[M+H]+	C11H12O6		1.49796e+08	1.20175e+08	1.13126e+08	7.95117e+07	8.69724e+07	8.51072e+07	8.38638e+07
(3R)-4,4-Dimethyl-3-[(2S,3R,4S,5S,6R)-3,4,5-Trihydroxy-6-(Hydroxymethyl)Oxan-2-Yl]Oxyoxolan-2-One	P5749		---	---	---	---	5.007	315.111	[M+H]+	C12H20O8	Fatty acyl glycosides of mono- and disaccharides	4.00926e+08	1.97068e+08	228640086	3.05401e+08	4.76794e+08	4.33946e+08	405380380
(3E,5E)-2-(4-Methoxy-4-Oxobutyl)Nona-3,5-Dienoic Acid	P4432		---	---	---	---	8.271	255.158	[M+H]+	C14H22O4	Medium-chain fatty acids	1.00209e+08	1.29007e+08	1.29737e+08	1.39052e+08	1.4787e+08	145665052	144195411
(2Z)-2-[(E)-6-(Hydroxymethyl)-2,4,8,10-Tetramethyldodec-2-Enylidene]-4-Methylpentanedioic Acid	P7286		---	---	---	---	10.616	414.321	[M+NH4]+	C23H40O5	Acyclic diterpenoids	4.37788e+08	2.80428e+08	3.07007e+08	2.54715e+08	2.4949e+08	2.50796e+08	2.51667e+08
(2S,3S)-3-Decyl-2-Hydroxy-2-(3-Methoxy-3-Oxopropyl)Butanedioic Acid	P6538		---	---	---	---	10.284	361.22	[M+H]+	C18H32O7	Tricarboxylic acids and derivatives	7.35365e+06	8.40325e+06	8.79308e+06	2.43396e+07	1.98381e+07	2.09634e+07	2.17137e+07
(2S)-N-(4-Ethoxyphenyl)-5-Oxo-1-(3-Oxo-1H-2-Benzofuran-1-Yl)Pyrrolidine-2-Carboxamide	P6847		---	---	---	---	9.61	381.145	[2M+H]+	C21H20N2O5		1.72776e+06	491190	2.58857e+06	7.98341e+06	6.01934e+06	6.51036e+06	6.8377e+06
(2R,3R,4S,5S,6R)-2-[3-Hydroxy-2-(4-Hydroxy-3-Methoxyphenyl)Propoxy]-6-(Hydroxymethyl)Oxane-3,4,5-Triol	P7086		---	---	---	---	6.077	399.106	[M+H]+	C16H24O9	O-glycosyl compounds	3.49973e+07	3.42134e+07	2.93494e+07	1.90114e+07	1.63727e+07	1.70324e+07	1.74722e+07
(2R,3R,4S,5S,6R)-2-[(2E)-4-Ethenyl-2,5-Dimethylhexa-2,5-Dienoxy]-6-(Hydroxymethyl)Oxane-3,4,5-Triol	P6163		---	---	---	---	1.46	337.17	[M+H]+	C16H26O6	Fatty acyl glycosides of mono- and disaccharides	228221298	5.08311e+08	2.18974e+08	1368203828	1648046543	1578085864	1531445412
(2R,3R)-2-(3,4-Dihydroxyphenyl)-3,5,7-Trihydroxy-2,3-Dihydro-4H-Chromen-4-One	P5973		---	---	---	---	1.145	327.05	[M+H-2H2O]+	C15H12O7	Flavanonols	1.28164e+08	1.22075e+08	7.43634e+07	8.50473e+07	8.57715e+07	8.55905e+07	8.54698e+07
(2R)-6-Methylpiperidine-2-Carboxylic Acid	P1646		---	---	---	---	5.743	144.102	[M+H]+	C7H13NO2	L-alpha-amino acids	5934624372	2586888865	2988313133	2589031859	2138453075	2251097771	2326194235
(2E,4E,14E)-13-Hydroperoxy-N-(2-Methylpropyl)Icosa-2,4,14-Trienamide	P7018		---	---	---	---	10.121	394.329	[M+H]+	C24H43NO3	N-acyl amines	2.95517e+06	3.68523e+06	3.12048e+06	1.21124e+07	9.85275e+06	1.04177e+07	1.07943e+07
(2E,4E,14E)-13-Hydroperoxy-1-Piperidin-1-Ylicosa-2,4,14-Trien-1-One	P7186		---	---	---	---	12.2	406.327	[M+Na]+	C25H43NO3	N-acylpiperidines	2.86838e+07	2.35434e+07	3.49855e+07	1.66266e+07	1.64354e+07	1.64832e+07	1.65151e+07
(2E,4E,12Z)-N-(2-Methylpropyl)Octadeca-2,4,12-Trienamide	P6112		---	---	---	---	10.516	334.309	[M+H]+	C22H39NO	N-acyl amines	4.20436e+06	9.42007e+06	5.08362e+06	2.04126e+07	1.69991e+07	1.78525e+07	1.84214e+07
(2E,4E)-N-[2-(4-Hydroxyphenyl)Ethyl]Dodeca-2,4-Dienamide	P5776		---	---	---	---	10.02	316.229	[M+H]+	C20H29NO2	1-hydroxy-2-unsubstituted benzenoids	302741	598597	552595	4.16162e+07	3.32102e+07	3.53117e+07	3.67127e+07
(2E,4E)-N-(2-Methylpropyl)Dodeca-2,4-Dienamide	P4747		---	---	---	---	10.645	269.262	[M+H]+	C16H29NO	N-acyl amines	3.4151e+07	4.97507e+06	7.23181e+06	3.10214e+07	2.47239e+07	2.62983e+07	2.73478e+07
(2-{[3-(Hexadecanoyloxy)-2-Hydroxypropyl Phosphonato]Oxy}Ethyl)Trimethylazanium	P8276		---	---	---	---	9.511	496.339	[M+H]+	C24H50NO7P		6.79252e+07	1.15588e+08	105432108	7.06831e+08	6.12149e+08	6.3582e+08	6.516e+08
(+)-Dihydrokavain	P4780		---	---	---	---	1.347	271.039	[M+K]+	C14H16O3	Kavalactones	1.57183e+08	1.88388e+08	1.52833e+08	8.10458e+07	8.84461e+07	8.6596e+07	8.53627e+07
(+)-Butaclamol Hydrochloride	P6549		---	---	---	---	5.636	362.24	[M+Na]+	C25H32ClNO		2.73671e+08	2.78872e+08	1.81243e+08	2.51564e+08	1.79221e+08	1.97307e+08	2.09364e+08

## Sheet: Metabo_NEG
MetaboName	Alignment ID	KEGGID	HMDBID	SuperClass	Class	SubClass	RT(min)	m/z	Adduct type	Formula	Ontology	SCT1	SCT2	SCT3	QC1	QC2	QC3	QC4
Yohimbic Acid Hydrate	N4674		---	---	---	---	11.054	339.214	[M+Hac-H]-	C20H26N2O4	Corynanthean-type alkaloids	5.73236e+06	4.79339e+06	5.31463e+06	1.92418e+07	1.74024e+07	1.70196e+07	1.97447e+07
Warfarin	N4007	C01541	HMDB0001935	Phenylpropanoids and polyketides	Coumarins and derivatives	Hydroxycoumarins	5.246	307.09	[M-H]-	C19H16O4	4-hydroxycoumarins	4.3517e+07	2.15227e+07	2.05735e+07	5.97978e+07	1.43011e+07	7.06483e+06	8.51202e+06
Verproside	N7069		HMDB0259794	Organic oxygen compounds	Organooxygen compounds	Carbohydrates and carbohydrate conjugates	8.931	497.211	[M-H]-	C22H26O13	O-glycosyl compounds	421350	400294	719944	8.81077e+06	5.47982e+06	6.55708e+06	7.36644e+06
Usnic Acid	N4745		HMDB0259730	Benzenoids	Benzene and substituted derivatives	Acetophenones	5.02	343.071	[M+Hac-H]-	C18H16O7		6.32965e+07	3.97388e+07	3.43931e+07	2.10979e+07	3.30249e+07	3.46372e+07	3.02118e+07
Uridine 5'-Diphosphate	N5766	C00015	HMDB0000295	Nucleosides, nucleotides, and analogues	Pyrimidine nucleotides	Pyrimidine ribonucleotides	2.374	402.988	[M-H]-	C9H14N2O12P2	Pyrimidine ribonucleoside diphosphates	2.07251e+08	1.34487e+08	1.09978e+08	1.72567e+06	1.51735e+06	4.1743e+06	1420702289
Uridine	N2654	C00299	HMDB0000296	Nucleosides, nucleotides, and analogues	Pyrimidine nucleosides	---	4.307	243.061	[M-H]-	C9H12N2O6	Pyrimidine nucleosides	4.48426e+07	4.66181e+07	3.98343e+07	2090216364	2095902422	1301218166	1389161650
Uncarine C	N5192	C17595	---	---	---	---	11.669	367.231	[M-H]-	C21H24N2O4	Indolizidines	1.98558e+08	1.18725e+08	1.52556e+08	1.98351e+08	2.14881e+08	1.8515e+08	2.37504e+08
Tryptophan	N1845	C00806	HMDB0013609	Organoheterocyclic compounds	Indoles and derivatives	Indolyl carboxylic acids and derivatives	5.28	203.081	[M-H]-	C11H12N2O2	Indolyl carboxylic acids and derivatives	1737541422	2345100628	2482751533	1128690418	3081296550	1021261874	2846435538
Triptophenolide	N4100		---	---	---	---	11.135	311.168	[M-H]-	C20H24O3	Oxosteroids	1614215726	1117976818	1040442112	1244055593	1194208071	1264562725	1512961314
Trifluoroacetic Acid	N292		HMDB0014118	Organic acids and derivatives	Carboxylic acids and derivatives	Alpha-halocarboxylic acids and derivatives	1.666	112.984	[M-H]-	C2HF3O2	PFSA	1650786346	3.38104e+08	1304458599	1863584122	1837675106	1707558302	1842959277
Toradol	N2857		HMDB0014608	Organic oxygen compounds	Organooxygen compounds	Carbonyl compounds	5.127	254.079	[M-H]-	C15H13NO3	Aryl-phenylketones	7.76603e+08	4.79521e+08	6.25722e+08	1109110542	9.1719e+08	1191594779	9.47151e+08
Thymidine-5'-Triphosphate Sodium Salt	N6865		---	---	---	---	8.176	480.986	[M-H]-	C10H17N2O14P3	Pyrimidine 2'-deoxyribonucleoside triphosphates	1.57341e+08	1.27388e+08	1.37859e+08	2.86058e+08	2.3161e+08	2.72309e+08	1.55639e+08
Thymidine	N2607	C00214	HMDB0000273	Nucleosides, nucleotides, and analogues	Pyrimidine nucleosides	Pyrimidine 2'-deoxyribonucleosides	5.085	241.082	[M-H]-	C10H14N2O5	Pyrimidine 2'-deoxyribonucleosides	9.79959e+07	5.7088e+07	9.37788e+07	3.23557e+08	2.00345e+08	1.348e+08	2.52569e+08
Tetrahydroalstonine	N5679	C11682	HMDB0248072	Alkaloids and derivatives	Yohimbine alkaloids	---	7.044	397.177	[M-H2O-H]-	C21H24N2O3	Alkaloids	8.66724e+08	6.79191e+08	7.43616e+08	2222615837	1405142174	1933440333	1171393716
Taurolithocholic Acid	N6885	C02592	HMDB0000722	Lipids and lipid-like molecules	Steroids and steroid derivatives	Bile acids, alcohols and derivatives	9.066	482.292	[M-H]-	C26H45NO5S		8.07049e+07	6.69574e+07	7.44333e+07	8.51332e+07	9.52447e+07	9.35339e+07	7.46573e+07
Taurohyodeoxycholic Acid	N7080		---	---	---	---	7.825	498.288	[M-H]-	C26H45NO6S		4.11576e+08	2.99048e+08	3.35831e+08	5.55263e+08	4.78745e+08	5.75338e+08	3.70147e+08
Taurocholic Acid	N7251	C05122	HMDB0000036	Lipids and lipid-like molecules	Steroids and steroid derivatives	Bile acids, alcohols and derivatives	7.174	514.283	[M-H]-	C26H45NO7S	Trihydroxy bile acids, alcohols and derivatives	4.62898e+07	4.15328e+07	4.8803e+07	9.78774e+07	6.8529e+07	1.00473e+08	6.22225e+07
Succinic Acid	N355	C00042	HMDB0000254	Organic acids and derivatives	Carboxylic acids and derivatives	Dicarboxylic acids and derivatives	2.011	117.018	[M-H]-	C4H6O4	Dicarboxylic acids and derivatives	4.65841e+07	4.63232e+07	2.73584e+07	2.56948e+07	3.4431e+07	2.96029e+07	2.20488e+07
Sorbicillin	N2406		---	---	---	---	1.381	231.062	[M+Hac-H]-	C14H16O3	Xylenols	1.43662e+08	1.58353e+08	1.48273e+08	1.47632e+08	1.42123e+08	1.24869e+08	1.36427e+08
Sinomenine	N4437	C09643	HMDB0258305	Alkaloids and derivatives	Morphinans	---	5.353	328.151	[M-H]-	C19H23NO4	Alkaloids	3.78528e+07	3.57717e+07	3.97563e+07	1.96242e+07	2.66024e+07	3.29192e+07	4.73311e+07
Sinapyl Alcohol	N1963	C02325	HMDB0013070	Benzenoids	Phenols	Methoxyphenols	1.385	209.08	[M-H]-	C11H14O4	Methoxyphenols	9.70417e+07	9.69435e+07	1.05554e+08	1.47069e+08	1.70167e+08	1.36221e+08	1.50089e+08
Selaginpulvilin I	N7064		---	---	---	---	5.282	497.139	[M+Hac-H]-	C33H22O5	Fluorenes	2.51569e+07	2.70503e+07	4.2074e+07	5.86983e+07	8.90528e+07	9.76352e+06	3.99609e+07
Securinine	N2103	C10614	---	---	---	---	1.573	216.098	[M-H]-	C13H15NO2	Indolizidines	5.4101e+07	7.18497e+07	6.01725e+07	1.73765e+08	1.64012e+08	1.40369e+08	1.3168e+08
Secoisolariciresinol Diglucoside	N8884		HMDB0036323	Lignans, neolignans and related compounds	Lignan glycosides	---	5.218	731.277	[M-H]-	C32H46O16	Lignols	4.91398e+06	7.16065e+06	8.14068e+06	1.49814e+07	4.69811e+07	2.72368e+07	3.61372e+07
S-D-Lactoylglutathione	N5352	C03451	HMDB0001066	Organic acids and derivatives	Carboxylic acids and derivatives	Amino acids, peptides, and analogues	4.41	378.095	[M-H]-	C13H21N3O8S	Oligopeptides	7.24422e+07	1.53155e+08	1.82123e+08	8.70685e+07	4.752e+08	1.94347e+08	4.14152e+08
Sarmentoside B	N8611		---	---	---	---	9.005	663.31	[M-H]-	C34H48O13	Cardenolide glycosides and derivatives	533602	722402	0	6.44519e+06	5.89104e+06	5.82017e+06	4.11992e+06
Rutamarin	N4986	C09308	HMDB0030666	Phenylpropanoids and polyketides	Coumarins and derivatives	Furanocoumarins	11.999	355.158	[M-H]-	C21H24O5	Psoralens	1.15693e+08	1.12303e+08	1.25165e+08	146527717	1.26497e+08	1.65715e+08	2.03419e+08
Roccellic Acid	N3844		---	---	---	---	11.609	299.258	[M-H]-	C17H32O4	Long-chain fatty acids	1.32547e+08	169583960	1.68939e+08	1.34429e+08	1.29445e+08	1.16971e+08	1.35817e+08
Ricinoleic Acid	N3799	C08365	HMDB0034297	Lipids and lipid-like molecules	Fatty Acyls	Fatty acids and conjugates	11.005	297.243	[M-2H]2-	C18H34O3	Long-chain fatty acids	2.98799e+08	2.68581e+08	2.9786e+08	178197260	1.67381e+08	1.7325e+08	1.814e+08
Retusin 7-Methyl Ether	N3793		---	---	---	---	2.979	297.108	[M-H]-	C17H14O5	7-O-methylisoflavones	1659727269	514541697	4.95903e+08	2234701083	1732733918	1700415792	1640772400
Pyroglutamic Acid	N514	C01879	HMDB0000267	Organic acids and derivatives	Carboxylic acids and derivatives	Amino acids, peptides, and analogues	2.997	128.034	[M-H]-	C5H7NO3	Alpha amino acids and derivatives	82428945747	81111831914	82007229966	52424472353	51921528999	51665051866	50855936044
Pyridoxine	N1143	C00314	HMDB0000239	Organoheterocyclic compounds	Pyridines and derivatives	Pyridoxines	2.831	168.065	[M-H]-	C8H11NO3	Pyridoxines	2809832292	2.98378e+07	2584385108	11258816159	15624650592	13258420969	8919317210
Pyridoxal	N1105	C00250	HMDB0001545	Organoheterocyclic compounds	Pyridines and derivatives	Pyridine carboxaldehydes	2.853	166.049	[M-H]-	C8H9NO3	Pyridoxals and derivatives	2.39684e+08	3.59305e+07	2.5152e+08	7.52691e+08	1361509535	1292974021	7.04584e+08
Purine	N385	C15587	HMDB0001366	Organoheterocyclic compounds	Imidazopyrimidines	Purines and purine derivatives	1.357	119.033	[M-H]-	C5H4N4	Purines and purine derivatives	4.18749e+08	437323787	5.10879e+08	3.81488e+08	3.55607e+08	2.41432e+08	2.49862e+08
Piplartine	N4209	C10166	HMDB0030341	Phenylpropanoids and polyketides	Cinnamic acids and derivatives	---	1.402	316.114	[M-H2O-H]-	C17H19NO5	Cinnamic acids and derivatives	3.595e+06	1.89874e+06	6.11681e+06	1.1326e+07	2.07926e+07	1.10409e+07	1.84235e+07
Phosphatidylinositol 18	N9295		---	---	---	---	13.391	885.546	[M-H]-	C47H83O13P	Phosphatidylinositols	6.4513e+07	5.72403e+07	7.19854e+07	7.32337e+07	7.25742e+07	6.58096e+07	1.95785e+07
Phosphatidylethanolamine Lyso Alkenyl 18	N6633		---	---	---	---	10.075	462.297	[M-H]-	C23H46NO6P	Glycerophosphoethanolamines	9.14914e+06	5.95694e+06	8.27734e+06	6.65354e+07	7.01273e+07	65930430	6.07007e+07
Phosphatidylethanolamine Lyso Alkenyl 16	N6256		---	---	---	---	9.854	436.282	[M-H]-	C21H44NO6P	Glycerophosphoethanolamines	2.96176e+07	2.1714e+07	2.48078e+07	1.81072e+08	2.02689e+08	186295476	1.61635e+08
Phosphatidylethanolamine Lyso 22	N7374		---	---	---	---	9.234	524.277	[M-H]-	C27H44NO7P	2-acyl-sn-glycero-3-phosphoethanolamines	8.07793e+06	7.46674e+06	7.08099e+06	1.46882e+07	1.72261e+07	1.54109e+07	1.08681e+07
Phosphatidylethanolamine Lyso 20	N7100		---	---	---	---	9.269	500.277	[M-H]-	C25H44NO7P	2-acyl-sn-glycero-3-phosphoethanolamines	1.0362e+07	1.01786e+07	9.6035e+06	3.1146e+07	3.19622e+07	2.80284e+07	2.28507e+07
Phosphatidylethanolamine Lyso 18	N6855		---	---	---	---	10.541	480.309	[M-H]-	C23H48NO7P	2-acyl-sn-glycero-3-phosphoethanolamines	1.76211e+07	1.81843e+07	1.97968e+07	1.04836e+08	9.93148e+07	104216511	1.05635e+08
Phosphatidylethanolamine 22	N9149		---	---	---	---	9.273	834.498	[M-H]-	C49H74NO8P	Phosphatidylethanolamines	214942	354129	94676.1	323153	312252	654250	23979.7
Phosphatidylcholine Lyso 18	N7678		---	---	---	---	10.277	552.364	[M+Hac-H]-	C26H52NO7P	2-acyl-sn-glycero-3-phosphocholines	1.95037e+06	855485	670614	1.98988e+07	2.3257e+07	2.21871e+07	2.23131e+07
Phosphatidylcholine Lyso 16	N7376		---	---	---	---	9.992	524.334	[M-H]-	C24H48NO7P	2-acyl-sn-glycero-3-phosphocholines	3.41877e+06	2.57771e+06	3.86744e+06	4.38393e+07	4.27786e+07	4.38501e+07	4.1507e+07
Phenylacetylglycine	N1601	C05598	HMDB0000821	Organic acids and derivatives	Carboxylic acids and derivatives	Amino acids, peptides, and analogues	6.016	192.065	[M-H]-	C10H11NO3	N-acyl-alpha amino acids	1.76263e+08	1.45138e+08	1.68074e+08	1.45549e+08	1.38477e+08	1.4604e+08	1.4786e+08
PFSM-perfluoroalkyl sulfonamide Et	N4383		---	---	---	---	3.972	325.996	[M-H]-	C6H6F9NO2S	PFSA	1.30002e+08	2.60618e+08	7.36979e+07	1.0031e+07	8.09322e+06	4.28767e+07	1.89733e+07
PFSM-amine	N2452		---	---	---	---	3.075	233.059	[M-H]-	C6H13F3N2O2S	PFSA	1.49314e+06	1.89155e+06	1.69039e+06	1.27304e+08	157216262	2.07672e+08	1.04673e+08
PFSA-pentafluorosulfide	N8570		---	---	---	---	1.128	656.884	[M-2H]2-	C9HF23O3S2	PFSA	4.77688e+07	4.75928e+07	4.52481e+07	4.79644e+07	3.62515e+07	3.85824e+07	2.85139e+07
PFSA-ether	N6176		---	---	---	---	1.118	430.928	[M+Hac-H]-	C6HF13O5S	PFSA	4.28788e+07	4.46869e+07	4.21247e+07	7.23993e+07	4.91337e+07	4.38878e+07	3.9924e+07
PFCA-H	N3216		---	---	---	---	1.067	270.978	[M-H]-	C6H3F7O4	PFSA	1.68224e+07	3.99254e+07	3.03289e+07	7.9837e+06	2.04762e+07	4.48002e+07	3.06756e+07
PFCA-diether Hsubstituted	N7060		---	---	---	---	1.126	496.948	[M+Hac-H]-	C8H2F16O6	PFSA	7.78024e+06	1.07152e+07	1.46287e+07	7.36558e+06	1.0391e+07	1.62313e+07	7.19546e+06
PFAP-PAP	N3077		---	---	---	---	5.976	264.957	[M-H]-	C3H2F7O4P	PFSA	8.98926e+07	1.44634e+08	3.8396e+07	2.3091e+07	2.19843e+07	3.83056e+07	1.19687e+07
Perfluoro-2-[(Perfluoropentyl)Oxy]Propanoic Acid	N6142		---	---	---	---	1.126	428.96	[M-H]-	C8HF15O3	PFSA	8.46992e+06	16837390	1.77686e+07	7.73055e+06	1.39442e+07	1.6924e+07	1.10877e+07
Paracetamol	N815	C06804	HMDB0001859	Benzenoids	Phenols	1-hydroxy-2-unsubstituted benzenoids	2.836	150.054	[M-H]-	C8H9NO2	1-hydroxy-2-unsubstituted benzenoids	6.71526e+08	1.98827e+07	6.53029e+08	2368436754	3872011510	3392324117	2068893321
Pantothenate	N2159	C00864	HMDB0000210	Organic oxygen compounds	Organooxygen compounds	Alcohols and polyols	5.123	218.102	[M-H]-	C9H17NO5	Secondary alcohols	19814775802	21824538949	22936208692	26625750727	24204580467	24917943412	25186697870
Pantoprazole	N5427	C11806	HMDB0005017	Organoheterocyclic compounds	Benzimidazoles	Sulfinylbenzimidazoles	5.03	382.073	[M+Hac-H]-	C16H15F2N3O4S	Sulfinylbenzimidazoles	4.42909e+07	3.99428e+07	4.84506e+07	3.40778e+07	4.95766e+07	5.89851e+07	57344922
Oryzalin	N4791	C18877	---	---	---	---	5.007	345.087	[2M-H]-	C12H18N4O6S	Dinitroanilines	2.41718e+08	2.19632e+08	184315515	3.17757e+08	3.39257e+08	4.05988e+08	3.97058e+08
Orotic Acid	N891	C00295	HMDB0000226	Organoheterocyclic compounds	Diazines	Pyrimidines and pyrimidine derivatives	1.56	155.01	[M-H]-	C5H4N2O4	Pyrimidinecarboxylic acids	8.58805e+08	8.54059e+08	7.45269e+08	1303182285	1194382647	1289788720	1105250883
Ophthalmate	N3584	C21016	HMDB0005765	Organic acids and derivatives	Carboxylic acids and derivatives	Amino acids, peptides, and analogues	7.657	288.123	[M-H]-	C11H19N3O6	Peptoid-peptide hybrids	9.32815e+07	4.18743e+07	6.85053e+07	1.86855e+07	1.16629e+07	2.00773e+07	1.73797e+07
Ofloxacin	N5065	C07321	HMDB0015296	Organoheterocyclic compounds	Quinolines and derivatives	Quinoline carboxylic acids	4.657	360.127	[M-H]-	C18H20FN3O4	Quinoline carboxylic acids	4.04467e+08	4.7935e+08	5.13469e+08	1415683086	1474533102	1275902741	1101880596
Ochrephilone	N5413		---	---	---	---	12.127	381.174	[M-H]-	C23H26O5	Cyclohexenones	1.59873e+07	9.70791e+06	8.58942e+06	2.91517e+07	2.56965e+07	2.69916e+07	4.5399e+07
Norstictic Acid	N5243		---	---	---	---	5.115	371.04	[M-H2O-H]-	C18H12O9	Diarylethers	6.13841e+06	1.07425e+07	1.31535e+07	9.60616e+06	1.55321e+07	1.60362e+07	1.21794e+07
Norrhizocarpic Acid	N6519		---	---	---	---	5.439	454.109	[2M-H]-	C27H21NO6		5.81271e+07	5.41274e+07	4.93632e+07	3.4324e+07	4.38323e+07	3.01594e+07	7.18478e+07
Nodakenin	N6300	C09279	---	---	---	---	5.311	439.161	[2M-H]-	C20H24O9	Psoralens	2.51679e+08	8.15738e+07	1.53381e+08	2.13095e+07	5.90158e+07	2.90103e+07	7.40066e+07
Nizatidine	N4476	C07270	HMDB0014723	Organoheterocyclic compounds	Azoles	Thiazoles	5.004	330.113	[M-H]-	C12H21N5O2S2	2,4-disubstituted thiazoles	1.8263e+08	1.83644e+08	1.32954e+08	3.69351e+08	5.13697e+08	5.4641e+08	4.26318e+08
N-Isovalerylglycine	N956		HMDB0000678	Organic acids and derivatives	Carboxylic acids and derivatives	Amino acids, peptides, and analogues	5.945	158.08	[M-H]-	C7H13NO3	N-acyl-alpha amino acids	3453545373	1863377183	2281502631	2270228810	1801203485	2181859284	2486148911
N-Fructosyl Pyroglutamate	N3625		---	---	---	---	3.305	290.087	[M-H]-	C11H17NO8	N-Fructosyl amino acids	1241642576	8.64281e+08	1208053353	5.26539e+07	2.01753e+08	1.87996e+08	2.58746e+08
N-Formylmethionine	N1293	C03145	HMDB0001015	Organic acids and derivatives	Carboxylic acids and derivatives	Amino acids, peptides, and analogues	5.348	176.037	[M-H]-	C6H11NO3S	Methionine and derivatives	662086964	3.78001e+08	4.41835e+08	2.26852e+08	346987325	3.68777e+08	3.55999e+08
Neobavaisoflavone	N4293		HMDB0255518	Phenylpropanoids and polyketides	Isoflavonoids	Isoflav-2-enes	11.644	321.21	[M-H]-	C20H18O4	Isoflavones	1.98059e+08	1.83218e+08	1.82129e+08	3.78245e+08	3.76885e+08	3.31443e+08	4.12154e+08
Naringin	N7947	C09789	HMDB0002927	Phenylpropanoids and polyketides	Flavonoids	Flavonoid glycosides	2.388	579.236	[M-H]-	C27H32O14	Flavonoid-7-O-glycosides	1.44023e+07	8.33775e+06	2.03117e+07	2.95566e+08	4.24113e+08	3.73411e+08	1.82495e+08
N-Acetylneuraminate	N4037	C00270	HMDB0000230	Organic oxygen compounds	Organooxygen compounds	Carbohydrates and carbohydrate conjugates	1.425	308.098	[M+Hac-H]-	C11H19NO9	N-acylneuraminic acids	4931110866	5264360915	7357538830	2015201408	2829121253	2539014110	2364228619
N-Acetyl-L-phenylalanine	N1907	C03519	HMDB0000512	Organic acids and derivatives	Carboxylic acids and derivatives	Amino acids, peptides, and analogues	6.247	206.081	[M-H]-	C11H13NO3	Phenylalanine and derivatives	387372683	2.08473e+08	314260980	2.7037e+08	1.60988e+08	1.59664e+08	2.85643e+08
N-Acetyl-L-Leucine	N1218	C02710	HMDB0011756	Organic acids and derivatives	Carboxylic acids and derivatives	Amino acids, peptides, and analogues	6.041	172.097	[M-H]-	C8H15NO3	Leucine and derivatives	4.64555e+08	2.77696e+08	3.6932e+08	2.81071e+08	2.80933e+08	3.45609e+08	3.38721e+08
N-Acetyl-L-glutamate	N1506	C00624	HMDB0001138	Organic acids and derivatives	Carboxylic acids and derivatives	Amino acids, peptides, and analogues	3.483	188.055	[M-H]-	C7H11NO5	Glutamic acid and derivatives	1744792423	1150466940	1738723799	5.47885e+08	8.37985e+08	1607684340	1486636113
N-Acetyl-Dl-Methionine	N1558		---	---	---	---	5.48	190.053	[M-H]-	C7H13NO3S	Methionine and derivatives	3.22002e+08	2.36104e+08	3.23594e+08	3.61406e+08	6.30234e+08	2.73806e+08	5.97586e+08
M-Xylene-4-Sulfonic Acid	N1433		---	---	---	---	1.339	185.02	[M-H]-	C8H10O3S	p-Methylbenzenesulfonates	292891266	3.46038e+08	4.32625e+08	3.78369e+08	3.65707e+08	2.73387e+08	2.71282e+08
Methyl 7-Deshydroxypyrogallin-4-Carboxylate	N3016		---	---	---	---	5.288	261.041	[M-H]-	C13H10O6	Tropolones	2.81474e+07	3.06955e+07	3.58459e+07	7.89801e+07	1.12516e+08	2.51608e+07	5.12368e+07
Methyl 2-Ethyl-4-[(3R,4R,5S)-5-Hydroxy-4,5-Dimethyl-2-Oxooxolan-3-Yl]-2-Methyl-3-Oxobutanoate	N3518		---	---	---	---	1.392	285.118	[M-H]-	C14H22O6	Annonaceous acetogenins	0	1.97692e+06	1.30823e+06	8.2216e+07	6.2016e+07	6.31813e+07	5.5263e+07
Methyl 2-(3,5-Dichloro-2-Hydroxy-6-Methoxy-4-Methylbenzoyl)-3,5-Dihydroxybenzoate	N5700		---	---	---	---	2.984	399.004	[M+Hac-H]-	C17H14Cl2O7	Benzophenones	1.4937e+08	1.5706e+08	5.63318e+07	2.71297e+07	1.11829e+07	2.6443e+07	3.56886e+07
Methanesulfonate	N112	C11145	HMDB0240280	Organic acids and derivatives	Organic sulfonic acids and derivatives	Organosulfonic acids and derivatives	1.994	94.9791	[M-H]-	CH4O3S	Organosulfonic acids	2.78404e+08	1.84094e+08	2.28999e+08	275298792	1.64508e+08	1.46029e+08	2.32146e+08
Mesoeryhthritol	N401		---	---	---	---	10.601	121.058	[M-H]-	C4H10O4		1.98707e+08	4.65641e+07	1.08943e+08	1.34896e+08	1.41974e+08	9.61693e+07	4.13794e+07
MCPB	N2304	C18529	---	---	---	---	4.818	227.052	[M-H]-	C11H13ClO3	Phenol ethers	8.79718e+07	1.3096e+08	9.227e+07	1.67819e+08	1.71526e+08	1.42089e+08	7.12054e+07
MCPA	N1738	C18528	HMDB0254366	Benzenoids	Benzene and substituted derivatives	Phenoxyacetic acid derivatives	1.539	199.018	[M-H]-	C9H9ClO3	Chlorophenoxyacetates	1863717825	1788707291	1618125159	2663625896	2400831906	2576888002	9.45609e+08
Lusianthridin	N2603		---	---	---	---	5.938	241.069	[M-H2O-H]-	C15H14O3	Hydrophenanthrenes	1.27065e+08	1.69452e+08	1.94562e+08	5.5002e+08	3.79493e+08	2.40169e+08	1.72006e+08
L-Tyrosine	N1352	C00082	HMDB0000158	Organic acids and derivatives	Carboxylic acids and derivatives	Amino acids, peptides, and analogues	3.831	180.065	[M-H]-	C9H11NO3	Tyrosine and derivatives	3952083992	3593538204	4295358946	3430644328	2529063578	2572605065	3950484490
L-Threonine	N374	C00188	HMDB0000167	Organic acids and derivatives	Carboxylic acids and derivatives	Amino acids, peptides, and analogues	1.362	118.049	[M-H]-	C4H9NO3	L-alpha-amino acids	3.85514e+08	5.00781e+08	4.41279e+08	2.46078e+08	2.25151e+08	2.15778e+08	2.48939e+08
L-Theanine	N1248	C01047	HMDB0034365	Organic acids and derivatives	Carboxylic acids and derivatives	Amino acids, peptides, and analogues	5.675	173.092	[M-H]-	C7H14N2O3	Glutamine and derivatives	3.40174e+08	2.6637e+08	2.57689e+08	2.04101e+08	275297077	1.43513e+08	1.9037e+08
LTC4	N8359	C02166	HMDB0005095	Organic acids and derivatives	Carboxylic acids and derivatives	Amino acids, peptides, and analogues	9.928	624.304	[M-H]-	C30H47N3O9S	Oligopeptides	1.46702e+06	726558	939045	2.57502e+07	1.83074e+07	1.98327e+07	2.31973e+07
L-Pipecolic Acid	N516	C00408	HMDB0000716	Organic acids and derivatives	Carboxylic acids and derivatives	Amino acids, peptides, and analogues	5.12	128.07	[M-H]-	C6H11NO2	Alpha amino acids	7.03606e+08	2.81185e+08	3.89234e+08	4.06293e+08	3.39315e+08	2.7584e+08	2.79808e+08
LPE 18:2	N6802		---	---	---	---	9.278	476.276	[M-H]-	C23H44NO7P	Lipids	3.62782e+06	2.87419e+06	3.30768e+06	2.25176e+07	2.46388e+07	2.371e+07	1.98823e+07
LPE 18:1	N6829		---	---	---	---	9.819	478.294	[M-H]-	C23H46NO7P	Lipids	5.85837e+07	5.13609e+07	5.14791e+07	2.43598e+08	2.54849e+08	239336644	2.26176e+08
LPE 16:0	N6493		---	---	---	---	9.577	452.277	[M-H]-	C21H44NO7P	Lipids	2.06626e+07	2.01741e+07	1.99354e+07	8.16037e+07	8.175e+07	8.60498e+07	7.12925e+07
LPC 18:2	N7788		---	---	---	---	9.344	564.328	[M-H]-	C35H43N5O2	Lipids	1.97245e+07	1.32308e+07	1.28491e+07	196667081	1.66955e+08	1.72988e+08	1.50323e+08
LPC 18:1	N7810		HMDB0002815	Lipids and lipid-like molecules	Glycerophospholipids	Glycerophosphocholines	9.931	566.346	[M+FA-H]-	C26H52NO7P	Lipids	2.37993e+08	1.97397e+08	2.00564e+08	1375309938	1300779098	1294155028	1292989943
LPC 16:0	N7553		---	---	---	---	9.68	540.328	[M+FA-H]-	C24H50NO7P	Lipids	4.56339e+08	3.7731e+08	3.81491e+08	1515952390	1592667859	1432672123	1407790893
L-Norvaline	N349	C01826	---	---	---	---	2.367	116.07	[M-H]-	C5H11NO2	L-alpha-amino acids	9.16358e+08	1306032897	9.72046e+08	3284951913	4190674495	4752416914	2898020040
L-Methionine	N792	C00073	HMDB0000696	Organic acids and derivatives	Carboxylic acids and derivatives	Amino acids, peptides, and analogues	1.467	148.042	[M-H]-	C5H11NO2S	Methionine and derivatives	3.70734e+07	7.07297e+07	3.24345e+07	5.49607e+07	5.66063e+07	6.36517e+07	6.16344e+07
L-Leucine	N548	C00123	HMDB0000687	Organic acids and derivatives	Carboxylic acids and derivatives	Amino acids, peptides, and analogues	3.062	130.086	[M-H]-	C6H13NO2	Leucine and derivatives	8.51056e+08	6.97674e+08	13036919030	6677756235	7177131419	6838290131	7472863515
L-Kynurenine	N1920	C00328	HMDB0000684	Organic oxygen compounds	Organooxygen compounds	Carbonyl compounds	5.97	207.076	[M-H]-	C10H12N2O3		5.21752e+08	2.41242e+08	2.99402e+08	2.27722e+08	1.6163e+08	1.30502e+08	2.52241e+08
L-Histidine	N878	C00135	HMDB0000177	Organic acids and derivatives	Carboxylic acids and derivatives	Amino acids, peptides, and analogues	1.38	154.061	[M-H]-	C6H9N3O2	Histidine and derivatives	2.5869e+08	3.9826e+08	3.64381e+08	4.66594e+08	4.54178e+08	3.61687e+08	705370537
Levodopa	N1674	C00355	HMDB0000181	Organic acids and derivatives	Carboxylic acids and derivatives	Amino acids, peptides, and analogues	5.098	196.06	[M-H]-	C9H11NO4	Tyrosine and derivatives	1.89334e+08	195279508	2.21074e+08	1.82726e+08	1.15473e+08	8.95577e+07	1.7406e+08
Lepraric Acid	N8860		---	---	---	---	4.881	723.187	[M-H]-	C18H18O8	Chromones	1.19342e+06	1.05092e+06	2.7031e+06	3.50442e+07	2.38145e+07	3.58484e+07	2.3969e+07
L-Beta-Homotyrosine	N1641	C19622	---	---	---	---	8.97	194.081	[M-H]-	C10H13NO3	Beta amino acids and derivatives	1.23004e+08	1.2905e+08	1.50666e+08	1.33846e+08	1.18975e+08	1.15762e+08	1.14898e+08
Lamalbid	N6031		---	---	---	---	5.537	421.135	[M-H]-	C17H26O12		7.20294e+07	5.07663e+07	5.77684e+07	5.84084e+07	9.60734e+07	3.51572e+07	1.22589e+08
L-Alanine	N56	C00041	HMDB0000161	Organic acids and derivatives	Carboxylic acids and derivatives	Amino acids, peptides, and analogues	5.123	88.0385	[M-H]-	C3H7NO2	Alanine and derivatives	163334463	1.86251e+08	1.97339e+08	2.17699e+08	2.23024e+08	2.01599e+08	2.33853e+08
L-(+)-Arginine	N1250	C00062	HMDB0000517	Organic acids and derivatives	Carboxylic acids and derivatives	Amino acids, peptides, and analogues	1.385	173.103	[M-H]-	C6H14N4O2	L-alpha-amino acids	6.42883e+08	6.78275e+08	7.02936e+08	9.11777e+08	9.04683e+08	8.36426e+08	992372543
L-(-)-Phenylalanine	N1072	C00079	---	---	---	---	5.101	164.07	[M-H]-	C9H11NO2	Phenylalanine and derivatives	8571511490	7234804421	8814296118	10407453346	8983504999	7857597636	10272217343
Kojic Acid	N674	C14516	HMDB0032923	Organoheterocyclic compounds	Pyrans	Pyranones and derivatives	7.221	141.019	[M-H]-	C6H6O4	Pyranones and derivatives	1.25393e+08	3.71838e+07	8.14918e+07	5.96177e+07	8.44318e+07	7.51158e+07	7.22943e+07
Ketoleucine	N535		HMDB0000695	Organic acids and derivatives	Keto acids and derivatives	Short-chain keto acids and derivatives	5.955	129.054	[M-H]-	C6H10O3	Short-chain keto acids and derivatives	60135012611	47350255828	54990213533	38213049719	28082106829	31540822071	36664565348
Isradipine	N5232		HMDB0014415	Organoheterocyclic compounds	Benzoxadiazoles	---	5.8	370.138	[M-H]-	C19H21N3O5	Benzoxadiazoles	5.34147e+07	2.92853e+07	4.23459e+07	5.01319e+07	2.05132e+07	3.05512e+07	3.05238e+07
Isorhynchophylline	N5455	C16980	HMDB0253688	Organoheterocyclic compounds	Indolizidines	---	13.111	383.189	[M-H]-	C22H28N2O4	Indolizidines	5.96033e+06	4.72911e+06	3.8667e+06	3.19408e+07	2.25056e+07	1.53784e+07	3.02322e+07
Isoreserpin	N8229		---	---	---	---	5.007	607.266	[M-H2O-H]-	C33H40N2O9	Yohimbine alkaloids	1.8257e+08	2.14094e+08	1.99261e+08	1048209614	8.82584e+08	8.055e+08	7.81413e+08
Isoleucylisoleucine	N2663		HMDB0028910	Organic acids and derivatives	Carboxylic acids and derivatives	Amino acids, peptides, and analogues	5.647	243.171	[M-H]-	C12H24N2O3	Peptides	1.52202e+06	307767	541518	6.24529e+06	1.28386e+07	6.60972e+06	6.13234e+06
Irigenin Trimethyl Ether	N5748		---	---	---	---	5.636	401.24	[M-H]-	C21H22O8	7-O-methylisoflavones	2.00456e+07	1.22528e+07	2.14257e+07	2.13418e+07	5.13497e+07	1.63452e+07	1.79893e+07
Iretol	N900		---	---	---	---	5.092	155.081	[M-H]-	C7H8O4	Methoxyphenols	6.73252e+08	2.53361e+08	3.76939e+08	3.72227e+08	2.51357e+08	2.28394e+08	2.42276e+08
Inosine-5-Monophosphate	N4823		---	---	---	---	2.991	347.046	[M-H]-	C10H13N4O8P	Purine ribonucleoside monophosphates	1.19512e+08	1.48682e+08	1.34157e+08	2.72435e+08	2.41336e+08	1.17648e+08	6.5054e+07
Indolelactate	N1868	C02043	HMDB0000671	Organoheterocyclic compounds	Indoles and derivatives	Indolyl carboxylic acids and derivatives	6.379	204.065	[M-H]-	C11H11NO3	Indolyl carboxylic acids and derivatives	8.00428e+07	7.63876e+07	7.26799e+07	1.09173e+08	6.0653e+07	9.13135e+07	8.16845e+07
Icariin	N8668	C17555	---	---	---	---	5.095	675.235	[M-H]-	C33H40O15	Flavonoid-7-O-glycosides	4.36791e+07	3.61604e+07	6.19172e+07	2.55127e+08	1.58644e+08	1.41196e+08	2.0614e+08
Hydroxymethylglutaric Acid	N1018		---	---	---	---	1.347	161.044	[M-H2O-H]-	C6H10O5	Organic acids	3311084159	3221737818	4348013504	2152668202	1810711989	1887018743	1448353552
Hippurate	N1322	C01586	HMDB0000714	Benzenoids	Benzene and substituted derivatives	Benzoic acids and derivatives	5.802	178.049	[M-H]-	C9H9NO3	Hippuric acids	1041793354	8.26e+08	1093225246	8.93255e+08	8.44889e+08	9.83049e+08	1239135402
Hetisine	N5295	C08687	---	---	---	---	5.126	374.193	[M-H]-	C20H27NO3	Alkaloids	1.85232e+08	9.94985e+07	1.32104e+08	1.29134e+08	8.14145e+07	1.20276e+08	8.50264e+07
Glycoursodeoxycholic Acid	N6424		HMDB0000708	Lipids and lipid-like molecules	Steroids and steroid derivatives	Bile acids, alcohols and derivatives	8.236	448.305	[M-H]-	C26H43NO5		2.13349e+08	1.68412e+08	1.541e+08	2.48109e+08	2.60509e+08	2.66422e+08	1.59668e+08
Glycocholic Acid	N6653	C01921	HMDB0000138	Lipids and lipid-like molecules	Steroids and steroid derivatives	Bile acids, alcohols and derivatives	7.495	464.3	[M-H]-	C26H43NO6		4.12517e+07	2.24646e+07	4.50191e+07	6.56113e+07	5.76262e+07	7.33214e+07	4.73862e+07
Glyceraldehyde	N64	C02154	HMDB0001051	Organic oxygen compounds	Organooxygen compounds	Carbohydrates and carbohydrate conjugates	5.184	89.0226	[M-H]-	C3H6O3	Monosaccharides	39463978746	44060101098	27690619853	80340659080	37996212368	33332999522	23229365353
Glutathione (Oxidized)	N8268	C00127	---	---	---	---	4.987	611.142	[M-H]-	C20H32N6O12S2	Peptides	7.76223e+06	1.02585e+07	7.64395e+06	1.54082e+07	1.316e+07	1.83097e+07	1.86979e+07
Glutamine (D)	N741		---	---	---	---	1.338	145.06	[M-H]-	C5H10N2O3	D-alpha-amino acids	6.5815e+08	906905446	7.58803e+08	5.07121e+08	5.46692e+08	493100693	5.24966e+08
Gluconapin	N5259	C08415	HMDB0038427	Organic oxygen compounds	Organooxygen compounds	Carbohydrates and carbohydrate conjugates	6.412	372.042	[M-H]-	C11H19NO9S2	Alkylglucosinolates	2.15483e+07	2.13536e+07	1.10599e+07	2.51215e+06	421821	2.32671e+06	1.49502e+06
Gitoxigenin Diacetate	N6762		---	---	---	---	12.876	473.281	[M-H]-	C27H38O7		3222585674	4462233320	1563728705	9.38411e+08	3083098077	4689954184	1792369658
Gibberellin A53	N4832	C06094	HMDB0036895	Lipids and lipid-like molecules	Prenol lipids	Diterpenoids	5.669	347.192	[2M-H]-	C20H28O5	C20-gibberellin 6-carboxylic acids	4.09756e+07	8.06926e+06	1.60598e+07	4.71039e+06	1.05984e+07	7.29868e+06	7.6673e+06
Geniposide	N6216	C09781	HMDB0252679	Lipids and lipid-like molecules	Prenol lipids	Terpene glycosides	10.334	433.14	[M-H]-	C17H24O10	Iridoid glycosides	3.1855e+06	2.91517e+06	3.05984e+06	1.46998e+07	1.29516e+07	1.39253e+07	1.61897e+07
FT-thioether	N1474		---	---	---	---	6.14	187.006	[M-H]-	C5H7F3O2S	PFSA	1113446046	1117486758	1070731515	1306535153	2.87633e+08	770550587	1250971574
Fraxin	N5218	C09266	HMDB0252486	Phenylpropanoids and polyketides	Coumarins and derivatives	Coumarin glycosides	5.295	369.129	[M+Hac-H]-	C16H18O10	Coumarin glycosides	4.8646e+07	4.32175e+07	5.33262e+07	2.9316e+07	5.53012e+07	1.30738e+07	6.57789e+07
Fludioxonil	N2739	C18462	HMDB0252328	Organoheterocyclic compounds	Benzodioxoles	---	2.655	247.038	[M-H]-	C12H6F2N2O2	Benzodioxoles	346649	0	388793	1.19959e+06	2.46743e+06	2.74175e+06	449758
Fisetin	N3520	C10041	HMDB0031816	Phenylpropanoids and polyketides	Flavonoids	Flavones	8.051	285.126	[M+Hac-H]-	C15H10O6	Flavonols	2.67111e+08	310127105	3.97665e+08	348856041	3.05974e+08	3.64255e+08	237580678
Fenoldopam	N3937	C07693	HMDB0014938	Organoheterocyclic compounds	Benzazepines	---	6.164	304.079	[M-H]-	C16H16ClNO3	Benzazepines	1.66398e+07	1.65016e+07	1.50022e+07	6.20114e+07	5.09505e+06	4.49933e+06	1.87577e+07
FA 18:1+3O	N4470		---	---	---	---	8.021	329.233	[M-H]-	C18H34O5	Oxidized fatty acids	9.68271e+06	2.13355e+07	8.92718e+06	4.27639e+07	1.41578e+07	4.62245e+07	2.76409e+07
FA 18:1+1O	N3797		---	---	---	---	9.968	297.243	[M-H]-	C18H34O3	Oxidized fatty acids	1.72393e+08	1.59066e+08	1.57948e+08	1.93364e+08	1.88293e+08	1.89806e+08	1.842e+08
Ethyl 2,3-Dioxo-1,4-Dihydroquinoline-4-Carboxylate	N2431		---	---	---	---	5.239	232.064	[M-H]-	C12H11NO4		1.33728e+08	1.92147e+08	2.21673e+08	2.0053e+08	5.74026e+08	3.48142e+08	6.3868e+08
Epicatechin Gallate	N6328		HMDB0037944	Phenylpropanoids and polyketides	Flavonoids	Flavans	2.989	441.082	[M-H]-	C22H18O10	Catechin gallates	1.88256e+07	2.88009e+07	1.133e+08	2.76039e+07	1.06092e+07	7.16656e+06	1.75084e+08
Dodecylbenzenesulfonic Acid	N4371		HMDB0031031	Benzenoids	Benzene and substituted derivatives	Benzenesulfonic acids and derivatives	11.121	325.183	[M-H]-	C18H30O3S	Benzenesulfonic acids and derivatives	11017884386	7313785670	9017528203	10124094776	10972297971	10555316714	12383748213
Dl-2-Hydroxyvaleric Acid	N362		---	---	---	---	5.372	117.054	[M-H]-	C5H10O3	Hydroxy fatty acids	6.94669e+08	6.4274e+08	670635741	1078299019	8.68979e+08	1133743986	4.2595e+08
Disaccharides	N5489		---	---	---	---	6.165	385.139	[2M-H]-	C13H24O10	Sugars	7.26391e+07	2.81045e+07	3.39346e+07	3.20769e+07	7.60574e+06	1.61016e+07	3.92422e+07
Dihydromuronic Acid	N5193		---	---	---	---	10.408	367.246	[M-2H]2-	C21H36O5		1.19957e+07	4.4517e+06	5.00656e+06	5.92929e+06	6.32044e+06	3.78861e+06	8.59625e+06
Difucol Hexamethyl Ether	N4542		---	---	---	---	10.398	333.134	[M-H]-	C18H22O6	Biphenyls and derivatives	3.21376e+08	2.40081e+08	2.70236e+08	3.468e+08	2.9746e+08	2.79735e+08	3.49645e+08
Diffractaic Acid	N5279		---	---	---	---	5.042	373.125	[M+Hac-H]-	C20H22O7		2.97985e+07	2.46838e+07	3.01108e+07	1.46942e+07	8.44456e+06	1.18639e+07	1.15797e+07
Diferuloyl Putrescine	N6301		---	---	---	---	7.954	439.188	[M-H]-	C24H28N2O6	Ferulic acid and derivatives	3.90843e+06	3.93974e+06	6.78066e+06	9.9141e+06	6.54516e+06	7.40336e+06	5.81198e+06
D-Gulonic Acid Gama-Lactone	N1304		---	---	---	---	1.349	177.039	[M-H]-	C6H12O7	Medium-chain hydroxy acids and derivatives	3.34983e+08	3.74456e+08	5.08498e+08	2.37322e+08	1.93065e+08	240535964	1.85439e+08
D-Gluconic Acid	N1651	C00257	HMDB0303730	Organic acids and derivatives	Hydroxy acids and derivatives	Medium-chain hydroxy acids and derivatives	1.344	195.05	[M-H]-	C6H12O7	Medium-chain hydroxy acids and derivatives	140616795	137568956	1.81686e+08	8.75975e+07	7.42438e+07	7.8899e+07	4.45948e+07
Destruxin A	N7934		---	---	---	---	9.336	578.299	[M-H]-	C29H47N5O7	Cyclic depsipeptides	1.27017e+06	420463	333971	3.54308e+07	3.58325e+07	3.45345e+07	3.2364e+07
Deoxysappanone B 7,3'-Dimethyl Ether	N4140		---	---	---	---	5.004	313.096	[M-H]-	C18H18O5	Homoisoflavanones	502344931	3.77128e+08	307896758	6.37149e+08	711915690	8.41108e+08	7.80198e+08
Cytosine	N272	C00380	HMDB0000630	Organoheterocyclic compounds	Diazines	Pyrimidines and pyrimidine derivatives	13.325	110.034	[M-H]-	C4H5N3O	Pyrimidones	2.14216e+08	3.19206e+08	2.45992e+08	3.27388e+08	2.95748e+08	2.82136e+08	2.33866e+08
Cytidine	N3581	C00475	HMDB0000089	Nucleosides, nucleotides, and analogues	Pyrimidine nucleosides	---	6.388	288.06	[M-H]-	C9H13N3O5	Pyrimidine nucleosides	2.98683e+07	2.44461e+07	2.48562e+07	6.37588e+07	9.86708e+06	1.28608e+07	1.54858e+07
Cryptochlorophaeic Acid	N6586		---	---	---	---	5.145	459.195	[M-H2O-H]-	C25H32O8		3.18043e+08	3.54536e+08	524139486	4.46917e+08	4.40755e+08	4.48399e+08	2.75419e+08
Coumaroyl Quinic Acid	N4619		---	---	---	---	5.726	337.089	[M-H]-	C16H18O8	Coumaric acid and derivatives	3.67683e+07	2.95516e+07	3.74901e+07	5.79807e+07	1.06508e+08	4.54707e+07	8.61027e+07
Corymbosin	N5017		---	---	---	---	6.887	357.1	[M-H]-	C19H18O7	7-O-methylated flavonoids	6.07974e+07	6.42936e+07	6.74538e+07	1.36599e+08	8.24038e+07	1.44842e+08	9.26222e+07
Confluentic Acid	N7095		---	---	---	---	9.363	499.228	[M-H]-	C28H36O8		6.22505e+06	5.3158e+06	6.74058e+06	1.96737e+07	1.851e+07	1.5845e+07	2.23377e+07
Catechol	N258	C15571	HMDB0000957	Benzenoids	Phenols	Benzenediols	13.654	109.028	[M-H]-	C6H6O2	Catechols	1.67862e+08	1.3461e+08	1.41953e+08	1.24695e+08	5.2813e+07	1.52601e+08	1.62788e+08
Catechin	N3606	C06562	HMDB0002780	Phenylpropanoids and polyketides	Flavonoids	Flavans	4.322	289.067	[M-H]-	C15H14O6	Catechins	8.80903e+06	2.65238e+06	7.3304e+06	6.52928e+08	4.57553e+08	2.91805e+08	366571033
C12-AS	N3099		---	---	---	---	10.393	265.147	[M-H]-	C12H26O4S	Sulfuric acid monoesters	11741098665	9458164168	10064557944	9991730409	10722341927	10541684604	11264843115
C12-AE1S	N4066		---	---	---	---	10.99	309.173	[M-H]-	C14H30O5S	Sulfuric acid monoesters	472345383	3.84952e+08	3.23059e+08	271328977	3.00757e+08	2.92945e+08	340625919
beta-L-Arabinose	N809	C02479	HMDB0029942	Organic oxygen compounds	Organooxygen compounds	Carbohydrates and carbohydrate conjugates	1.35	149.044	[M-H]-	C5H10O5	Pentoses	1.77615e+08	1.76935e+08	2.43235e+08	1.21746e+08	1.08707e+08	1.19446e+08	7.73785e+07
Beta-Hydroxymyristic Acid	N2669		HMDB0061656	Lipids and lipid-like molecules	Fatty Acyls	Fatty acids and conjugates	9.904	243.196	[M-H]-	C14H28O3	Long-chain fatty acids	9.87122e+07	8.03002e+07	9.03548e+07	6.1846e+07	5.80289e+07	6.19178e+07	5.78642e+07
Bavachinin A	N4626		---	---	---	---	11.475	337.205	[M-H]-	C21H22O4	6-prenylated flavanones	1.59713e+08	1.26717e+08	9.08667e+07	1.27587e+08	1.33979e+08	1.24503e+08	1.43652e+08
Aurapten	N3795		HMDB0034054	Lipids and lipid-like molecules	Prenol lipids	Terpene lactones	10.041	297.152	[M-H]-	C19H22O3	Terpene lactones	7.88264e+08	5.0575e+08	6.53385e+08	8.56792e+08	8.00381e+08	5.59449e+08	6.1844e+08
Atalaphylline	N5363	C10645	---	---	---	---	8.632	378.24	[M-H]-	C23H25NO4	Acridones	880530	287868	1.3834e+06	8.74179e+06	9.83961e+06	1.10047e+07	8.47975e+06
Apigenin 6,8-Digalactoside	N8098		---	---	---	---	7.495	593.257	[M-H]-	C27H30O15	Flavonoid 8-C-glycosides	1.12353e+07	1.07047e+07	2.13758e+07	1.97064e+07	7.66676e+06	1.88596e+07	9.7466e+06
Aphidicolin	N4628	C06088	HMDB0245864	Lipids and lipid-like molecules	Prenol lipids	Diterpenoids	8.904	337.237	[M-H]-	C20H34O4	Aphidicolane and stemodane diterpenoids	1.24371e+07	8.87088e+06	9.84627e+06	1.02646e+07	1.03489e+07	1.25341e+07	1.25158e+07
Aloesin	N5612	C08994	---	---	---	---	11.122	393.17	[M-H]-	C19H22O9	Phenolic glycosides	1.58641e+08	9.53639e+07	1.22488e+08	1.66206e+08	8.9502e+07	1.46606e+08	2.00998e+08
Albendazole	N3068	C01779	HMDB0014659	Organoheterocyclic compounds	Benzimidazoles	2-benzimidazolylcarbamic acid esters	3.011	264.073	[M-H]-	C12H15N3O2S	2-benzimidazolylcarbamic acid esters	2.18734e+07	1.64135e+07	2.07485e+07	2.43201e+08	2.26604e+08	2.1879e+08	1.807e+08
Adrenosterone	N3838	C05285	HMDB0006772	Lipids and lipid-like molecules	Steroids and steroid derivatives	Androstane steroids	5.758	299.16	[M-H2O-H]-	C19H24O3	Androgens and derivatives	2.00364e+08	9.42938e+07	1.69185e+08	1.07612e+08	1.01759e+08	4.826e+07	112829192
Actrarit	N1599		---	---	---	---	5.295	192.065	[M+Hac-H]-	C10H11NO3	Benzene and substituted derivatives	761368922	4.55741e+08	6.23845e+08	2.74263e+08	4.26929e+08	2.23043e+08	437766873
Acetosyringone	N1649	C10664	---	---	---	---	1.572	195.005	[M-H]-	C10H12O4	Alkyl-phenylketones	291392491	3.12447e+08	3.54779e+08	3.54764e+08	3.76928e+08	3.25726e+08	2.14246e+08
Acetaminophen Glucuronide	N4387		HMDB0010316	Organic oxygen compounds	Organooxygen compounds	Carbohydrates and carbohydrate conjugates	5.097	326.123	[M-H]-	C14H17NO8	Phenolic glycosides	6071510886	5758646439	7146383472	9654506259	5550864786	6386699112	9775109140
9-Fluorenone	N1343	C06712	---	---	---	---	1.353	179.055	[M-H]-	C13H8O	Fluorenes	2752452624	2948540228	3477735363	2509307973	2309505658	2235570009	1961833714
8-Methylsulfinyloctyl Isothiocyanate	N2411		HMDB0035923	Organosulfur compounds	Sulfoxides	---	6.287	231.076	[M-2H]-	C10H19NOS2	Sulfoxides	308736324	1.68583e+08	2.28478e+08	1.83531e+08	8.29444e+07	1.35367e+08	2.45827e+08
8:2:2 Fluorotelomer Thioether Propanoic Acid	N7662		---	---	---	---	9.747	550.993	[M-H]-	C13H9F17O2S	PFSA	267913	0	0	3.71245e+06	1.24785e+07	9.75413e+06	365243
7-Butyl-6,8-Dihydroxy-3-[(3E)-3-Penten-1-Yl]-3,4-Dihydro-1H-Isochromen-1-One	N3924		---	---	---	---	5.736	303.155	[M-H]-	C18H24O4	Hydroxybenzoic acid derivatives	157019097	9.75356e+07	1.45567e+08	9.12588e+07	1.38462e+08	5.27197e+07	1.04578e+08
7,3',4'-Trihydroxyflavone	N3178		---	---	---	---	1.411	269.087	[M+Hac-H]-	C15H10O5	Flavones	4320853418	3976350204	3122067804	8913975261	9223862613	7473978612	8204332765
6-Gingerol	N3705	C10462	HMDB0005783	Benzenoids	Phenols	Methoxyphenols	8.477	293.175	[M+Hac-H]-	C17H26O4	Others	194081754	157529060	1.73749e+08	2.9341e+08	2.99555e+08	3.09694e+08	2.39364e+08
6-(Gamma,Gamma-Dimethylallylamino)Purine	N1828	C04083	HMDB0245646	Organoheterocyclic compounds	Imidazopyrimidines	Purines and purine derivatives	6.071	202.107	[M-H]-	C10H13N5	Hydropyrimidines	9.59703e+07	9.31837e+07	1.0429e+08	2.13933e+08	143340557	1.54359e+08	2.24105e+08
6-(1,1-Dimethylallyl)-2-(1-Hydroxy-1-Methylethyl)-2,3-Dihydro-7H-Furo[3,2-G]Chromen-7-One	N4144		---	---	---	---	5.851	313.14	[2M-H]-	C19H22O4	Psoralens	3.22463e+07	1.08811e+07	1.81637e+07	5.28683e+06	1.59684e+07	4.56765e+06	1.49893e+07
5-O-Caffeoylquinic Acid Methyl Ester	N5189		---	---	---	---	1.404	367.104	[M-H]-	C17H20O9	Quinic acids and derivatives	2.99495e+08	1.05152e+08	1.82616e+07	1.06825e+07	3.03e+06	9.72016e+06	7.51878e+06
5-Methylcytosine Hydrocloride	N447		---	---	---	---	13.021	124.058	[M-H]-	C5H7N3O	Hydroxypyrimidines	8.86417e+07	7.68474e+07	1.64373e+08	127382081	1.18046e+08	9.30965e+07	9.98785e+07
5-Methoxypsoralen	N2066	C01557	HMDB0030637	Phenylpropanoids and polyketides	Coumarins and derivatives	Furanocoumarins	1.516	215.031	[M-H]-	C12H8O4	5-methoxypsoralens	25107422490	25253597198	26168400804	47661751076	41267149740	37896217839	32648859190
5-Hydroxytryptophan	N2173	C01017	HMDB0000472	Organoheterocyclic compounds	Indoles and derivatives	Tryptamines and derivatives	5.293	219.076	[M-H]-	C11H12N2O3	Serotonins	1573356534	8.99642e+08	1152387561	4.3239e+08	8.36846e+08	3.95859e+08	8.40128e+08
5-Hydroxy-L-Tryptophan	N2174	C00643	HMDB0000472	Organoheterocyclic compounds	Indoles and derivatives	Tryptamines and derivatives	4.381	219.076	[M-H]-	C11H12N2O3	Serotonins	2.14905e+08	2.29658e+08	2.43733e+08	9.06527e+07	2.11532e+08	127775838	8.30033e+07
5-Hydroxy-4-Methoxy-5-Prop-1-En-2-Ylfuran-2-One	N1162		---	---	---	---	5.756	169.097	[M-H]-	C8H10O4	Butenolides	3686485586	1313297807	2515054941	1775444884	2047117900	1220869351	1879326527
5,7-Dihydroxy-2-(4-Methoxyphenyl)-6-(3-Methylbut-2-Enyl)-2,3-Dihydrochromen-4-One	N5540		---	---	---	---	5.095	389.12	[M-H]-	C21H22O5	6-prenylated flavanones	1.96066e+08	2.31784e+08	2.73378e+08	1.35975e+08	1.01263e+08	1.30885e+08	2.01066e+08
4-Pyridoxic Acid	N1388	C00847	HMDB0000017	Organoheterocyclic compounds	Pyridines and derivatives	Pyridinecarboxylic acids and derivatives	5.035	182.044	[M-H]-	C8H9NO4	Pyridinecarboxylic acids	9.1385e+07	1.2686e+08	1.35903e+08	7.53331e+07	9.70477e+07	107735432	8.65277e+07
4-Nitroquinoline 1-Oxide	N1554	C03474	HMDB0246549	Organoheterocyclic compounds	Quinolines and derivatives	Nitroquinolines and derivatives	5.065	190.035	[M-H]-	C9H6N2O3	4-nitroquinoline N-oxides	3.85509e+08	2.55423e+08	3.66336e+08	2.91258e+08	2.49283e+08	2.45818e+08	2.63991e+08
4-Acetamidobutanoate	N717	C02946	HMDB0003681	Organic acids and derivatives	Carboxylic acids and derivatives	Amino acids, peptides, and analogues	5.327	144.065	[M-H]-	C6H11NO3	Gamma amino acids and derivatives	1293771311	9.04821e+08	1135185613	1047111962	1065188294	7.7993e+08	1052897435
4,4`-Thiodiphenol	N2124		---	---	---	---	1.347	217.029	[M+Hac-H]-	C12H10O2S	Diarylthioethers	6257680275	8350595905	7350570135	3598141069	3956600873	3010873221	3798547959
3-O-Acetylpadmatin	N5046		---	---	---	---	5.959	359.043	[M-H2O-H]-	C18H16O8	7-O-methylated flavonoids	2.72821e+08	4.10699e+08	1.57829e+08	4.30623e+07	6.2047e+07	8.1623e+07	7.65063e+07
3-Methylxanthine	N1097	C16357	HMDB0001886	Organoheterocyclic compounds	Imidazopyrimidines	Purines and purine derivatives	1.351	165.039	[M+Hac-H]-	C6H6N4O2	Xanthines	380870880	3.87983e+08	4.85203e+08	2.18159e+08	2.30936e+08	223610992	1.38913e+08
3-Methylcrotonylglycine	N913	C20828	HMDB0000459	Organic acids and derivatives	Carboxylic acids and derivatives	Amino acids, peptides, and analogues	5.855	156.065	[M-H]-	C7H11NO3	N-acyl-alpha amino acids	4.89681e+08	3.07941e+08	384783917	3.5613e+08	3.32856e+08	3.43952e+08	3.60515e+08
3-Methoxy-4-Hydroxymandelate	N1701	C05584	HMDB0133489	Benzenoids	Phenols	Methoxyphenols	5.962	197.042	[M-H]-	C9H10O5	Methoxyphenols	5.46886e+08	4.80295e+08	5.44067e+08	1010188447	4.24085e+08	3.37414e+08	4.70394e+08
3-Hydroxykynurenine	N2229	C02794	HMDB0000732	Organic oxygen compounds	Organooxygen compounds	Carbonyl compounds	5.268	223.071	[M-H]-	C10H12N2O4	Alkyl-phenylketones	2.49427e+08	1.97957e+08	2.62904e+08	6.03051e+07	156860453	8.27981e+07	1.92935e+08
3-Deoxysappanchalcone	N3172		HMDB0037319	Phenylpropanoids and polyketides	Linear 1,3-diarylpropanoids	Cinnamylphenols	1.413	269.025	[M-H]-	C16H14O4	Cinnamylphenols	1.63353e+07	337802	1.15157e+07	6.26864e+07	5.34151e+07	5.16747e+07	5.60196e+07
3-[(2,6-Dihydroxy-3,4-Dimethylphenyl)Methyl]-2,4-Dihydroxy-6-Methylbenzaldehyde	N3877		---	---	---	---	8.149	301.11	[M-H]-	C17H18O5		5.11944e+07	4.0092e+07	4.16399e+07	8.771e+07	8.0759e+07	9.3234e+07	4.98373e+07
3:2 Fluorotelomer Alcohol	N2020		---	---	---	---	1.353	213.016	[M+Hac-H]-	C5H5F7O	PFSA	4.10192e+08	5.76484e+08	5.85507e+08	2.77668e+08	4.05629e+08	2.35996e+08	236813894
3-(5,7-Dimethoxy-4-Oxochromen-2-Yl)Propanoic Acid	N3359		---	---	---	---	5.079	277.058	[M+Hac-H]-	C14H14O6	Chromones	1.13953e+08	7.30248e+07	1.23537e+08	5.1968e+08	2.3686e+08	2.05674e+08	4.40703e+08
3-(4-Hydroxyphenyl)lactate	N1377	C03672	HMDB0000755	Phenylpropanoids and polyketides	Phenylpropanoic acids	---	5.377	181.049	[M-H]-	C9H10O4	Phenylpropanoic acids	3.60042e+08	4.55715e+08	4.82329e+08	2.50014e+08	3.12802e+08	507040051	3.51143e+08
3-(2,6-Dihydroxyphenyl)-4-Hydroxy-6-Methyl-3H-2-Benzofuran-1-One	N3227		---	---	---	---	5.281	271.069	[M-H]-	C15H12O5	Benzofuranones	2.62197e+08	3.03596e+08	3.59158e+08	3.08126e+08	5.58613e+08	1.43131e+08	3.54872e+08
2'-O-Methylinosine	N3446		---	---	---	---	5.016	281.107	[M-H]-	C11H14N4O5	Purine nucleosides	2.16312e+08	2.00308e+08	2.27033e+08	3.0663e+08	2.72598e+08	2.9348e+08	2.64259e+08
2-Hydroxy-4-Methoxy-3-(3-Methylbut-2-Enyl)-6-(2-Phenylethyl)Benzoic Acid	N4668		---	---	---	---	5.941	339.153	[M-H]-	C21H24O4	Stilbenes	4.48804e+07	1.04081e+07	2.24296e+07	5.07685e+07	3.07916e+07	2.33374e+07	3.14267e+07
2'-Deoxyinosine	N2816	C05512	HMDB0000071	Nucleosides, nucleotides, and analogues	Purine nucleosides	Purine 2'-deoxyribonucleosides	1.384	251.076	[M+Hac-H]-	C10H12N4O4	Purine 2'-deoxyribonucleosides	1157193331	1.9092e+08	3.92352e+08	1699762801	1894702014	1613071578	1543887803
2-Deoxycytidine-5-Monophosphoric Acid	N3984		---	---	---	---	4.289	306.057	[M-H]-	C9H14N3O7P	Pyrimidine 2'-deoxyribonucleoside monophosphates	5.5659e+07	2.14476e+07	3.16645e+07	9.45456e+07	2.90189e+08	5.49164e+08	4.19256e+08
2-Chloro-N6-Cyclopentyladenosine	N5205		HMDB0245059	Nucleosides, nucleotides, and analogues	Purine nucleosides	---	2.375	368.118	[M-H]-	C15H20ClN5O4	Purine nucleosides	2.60789e+07	8.55462e+06	1.50442e+07	9.88758e+07	1.08765e+08	1.31085e+08	5.11834e+07
2-[[1-(4-Nitrobenzoyl)Pyrrolidine-2-Carbonyl]Amino]Benzoic Acid	N5432		---	---	---	---	4.999	382.135	[M+Hac-H]-	C19H17N3O6	Acylaminobenzoic acid and derivatives	4.9113e+07	5.21687e+07	4.71234e+07	1.1646e+08	1.43753e+08	1.412e+08	1.10975e+08
2,5-Dihydroxy-3-Undecylcyclohexa-2,5-Diene-1,4-Dione	N3709		---	---	---	---	11.286	293.178	[M-H]-	C17H26O4	P-benzoquinones	4635360750	3975928486	3950482567	4913424793	5181231810	4984949954	5615716458
2,4-Dinitrophenol	N1405	C02496	HMDB0245462	Benzenoids	Phenols	Nitrophenols	1.347	183.005	[M-H2O-H]-	C6H4N2O5	Dinitrophenols	1.63039e+08	1.97889e+08	2.65381e+08	1.32317e+08	168033821	1.12474e+08	1.32249e+08
2,4-Diaminobenzenesulfonic Acid	N1475		HMDB0014917	Organoheterocyclic compounds	Diazanaphthalenes	Naphthyridines	5.75	187.013	[M-H]-	C6H8N2O3S		6.3726e+07	8.1435e+07	7.12011e+07	3.86668e+08	1.70361e+08	7.40985e+07	1.12106e+08
2,4,6-Tribromphenol	N4392	C14454	---	---	---	---	1.55	326.758	[M-H2O-H]-	C6H3Br3O	P-bromophenols	5.76351e+08	6.47305e+08	5.52991e+08	5.15766e+08	502694193	4.79424e+08	5.06612e+08
2,3-Dihydroxybiphenyl	N1439	C02526	---	---	---	---	2.196	185.055	[M-H]-	C12H10O2	Biphenyls and derivatives	2.78471e+08	7.42865e+07	1.57491e+08	2.02612e+07	3.75505e+07	5.10162e+07	3.4562e+07
2,3,4-Trihydroxy-4'-Ethoxybenzophenone	N3276		---	---	---	---	11.564	273.126	[M-2H]2-	C15H14O5	Benzophenones	2103207362	1981605694	9.70744e+08	1505226530	6.29191e+08	509624488	2387223399
2-(2-Acetyloxy-12-Hydroxytridecyl)-4,6-Dihydroxybenzoic Acid	N5885		---	---	---	---	7.186	409.222	[M-H]-	C22H34O7	Long-chain fatty alcohols	2.24094e+07	1.43163e+07	1.69703e+07	4.33491e+07	2.34472e+07	3.73688e+07	2.34871e+07
1-Myristoyl-2-Hydroxy-Sn-Glycero-3-Phosphoethanolamine	N6079		HMDB0011500	Lipids and lipid-like molecules	Glycerophospholipids	Glycerophosphoethanolamines	8.726	424.245	[M-H]-	C19H40NO7P	1-acyl-sn-glycero-3-phosphoethanolamines	319443	0	253435	3.64495e+06	3.7123e+06	4.04336e+06	2.71406e+06
1-Methylpseudouridine	N2925		---	---	---	---	2.996	257.077	[2M-H]-	C10H14N2O6	Nucleoside and nucleotide analogues	4015316915	2432061734	4022342225	1930810522	1926968984	1948569483	1024477411
1-Methylguanosine	N3763		HMDB0001563	Nucleosides, nucleotides, and analogues	Purine nucleosides	---	6.418	296.103	[M+Hac-H]-	C11H15N5O5	Purine nucleosides	8.767e+07	5.53635e+07	2.61826e+07	1.61458e+07	4.83903e+06	1.26878e+07	1.60274e+07
1-Hydroxy-3,6,7-Trimethoxy-2,8-Diprenylxanthone	N6271		HMDB0036597	Organoheterocyclic compounds	Benzopyrans	1-benzopyrans	5.129	437.212	[2M-H]-	C26H30O6	8-prenylated xanthones	3582973793	5376606755	5612483510	4667264749	4358627920	5487023985	3703355189
1-Hydroxy-2-Naphthoic Acid	N1477	C03203	HMDB0243892	Benzenoids	Naphthalenes	Naphthalenecarboxylic acids and derivatives	1.463	187.04	[M-H]-	C11H8O3	Naphthalenecarboxylic acids	9709105375	1933016466	6.42565e+08	6.23919e+08	6.32662e+08	6.295e+08	7.04681e+08
16-Hydroxypalmitate	N3235	C18218	HMDB0006294	Lipids and lipid-like molecules	Fatty Acyls	Fatty acids and conjugates	9.815	271.227	[M-H]-	C16H32O3	Long-chain fatty acids	1.78346e+07	1.65226e+07	1.84621e+07	1.0346e+07	1.41715e+07	1.34289e+07	1.35248e+07
1-[4-Hydroxy-3-(3-Methylbut-2-Enyl)Phenyl]Ethanone	N1842		---	---	---	---	3.616	203.048	[M-H]-	C13H16O2	Alkyl-phenylketones	2.42218e+07	2.47243e+07	2.52004e+07	374583953	4.48322e+08	7.97686e+08	603171394
1,8,9-Anthracenetriol	N2265		HMDB0248463	Benzenoids	Anthracenes	---	1.351	225.06	[M-H]-	C14H10O3	Anthracenes	1679875762	1864970432	2150749011	1378960487	1313666217	1236859475	9.89189e+08
1,3,7-Trimethyluric Acid	N1961	C16361	HMDB0002123	Organoheterocyclic compounds	Imidazopyrimidines	Purines and purine derivatives	1.403	209.065	[M-H]-	C8H10N4O3	Xanthines	1.35454e+08	6.00594e+07	9.15803e+07	2.23925e+08	227875521	2.2562e+08	1.32612e+08
1-(3,4-Dihydroxyphenyl)-6,7-Dihydroxy-1,2-Dihydronaphthalene-2,3-Dicarboxylic Acid	N5015		---	---	---	---	7.484	357.06	[M-H]-	C18H14O8	Aryltetralin lignans	56725957	3.48968e+07	6.36776e+07	9.57376e+07	8.21591e+07	1.10109e+08	7.59291e+07
[3,4,5-Trihydroxy-6-(Hydroxymethyl)Oxan-2-Yl] 3-Hydroxy-4,5-Dimethoxybenzoate	N5807		---	---	---	---	3.876	405.103	[M-H]-	C15H20O10	Hydrolyzable tannins	5.57871e+07	1.82451e+07	6.3223e+07	2.72189e+08	2.13949e+08	6.86855e+07	6.17428e+07
[(2R)-1-[(2S)-6-Oxo-2,3-Dihydropyran-2-Yl]Propan-2-Yl] 3-(3,4-Dihydroxyphenyl)Propanoate	N4264		---	---	---	---	5.721	319.15	[M-H]-	C17H20O6	Catechols	8.63499e+07	5.31535e+07	6.32261e+07	1.75967e+08	2.89574e+08	1.36668e+08	2.20887e+08
(Z)-3-Hydroxyhexadec-7-Enoic Acid	N3190		---	---	---	---	10.175	269.211	[M-H]-	C16H30O3	Long-chain fatty acids	5.85872e+07	5.02421e+07	6.06295e+07	3.94703e+07	3.84959e+07	3.71634e+07	3.39547e+07
(E,2S,3R)-5-[3-Hydroxy-2-(Hydroxymethyl)Phenyl]Pent-4-Ene-2,3-Diol	N2227		---	---	---	---	1.347	223.044	[M+Hac-H]-	C12H16O4	Cinnamyl alcohols	1.1393e+08	1.57773e+08	2.15656e+08	8.67898e+07	6.43492e+07	6.67284e+07	3.53952e+07
(E)-Resveratroloside	N5821		---	---	---	---	6.108	405.222	[2M-H]-	C20H22O9	Stilbene glycosides	0	383153	346583	4.41321e+06	2.17313e+06	3.84864e+06	6.16657e+06
(E)-2-(4,8-Dimethylnona-3,7-Dien-1-Yl)-5-Hydroxy-2,7-Dimethyl-2H-Chromene-8-Carbaldehyde	N4953		---	---	---	---	11.507	353.215	[M-H]-	C23H30O3		3.49627e+08	2.10772e+08	2.47182e+08	3.30065e+08	3.37315e+08	3.15007e+08	4.00678e+08
(E)-1-[2,4-Dihydroxy-3-[(2-Hydroxyphenyl)Methyl]-6-Methoxyphenyl]-3-Phenylprop-2-En-1-One	N5306		---	---	---	---	5.336	375.122	[2M-H]-	C23H20O5	Linear diarylheptanoids	5.65644e+07	1.54316e+07	3.5407e+07	1.35649e+07	2.24713e+07	1.04942e+07	1.36506e+07
(3E)-3-Benzylidene-4-Methyl-1H-1,4-Benzodiazepine-2,5-Dione	N3366		---	---	---	---	5.899	277.155	[M-H]-	C17H14N2O2	1,4-benzodiazepines	1.35072e+06	682061	1.4065e+06	8522618	9.51031e+06	5.81115e+06	1.33146e+07
(2S,3S)-2-(3,4-Dihydroxyphenyl)-3,7-Dihydroxy-2,3-Dihydrochromen-4-One	N3565		---	---	---	---	5.3	287.106	[M+Hac-H]-	C15H12O6	Flavanonols	6.41844e+06	1.53235e+06	1.11742e+06	1.09303e+06	2.77243e+06	548234	5.41432e+06

## Sheet: protein
PG.ProteinGroups	PG.ProteinAccessions	PG.Genes	PG.ProteinDescriptions	SCT-1.PG.Quantity	SCT-2.PG.Quantity	SCT-3.PG.Quantity
A0A024QYT5;P05121	A0A024QYT5;P05121	SERPINE1	Serpin peptidase inhibitor, clade E (Nexin, plasminogen activator inhibitor type 1), member 1, isoform CRA_b;Plasminogen activator inhibitor 1	55448.7	215098	168647
A0A024QZF1;M0QXN5;P37198	A0A024QZF1;M0QXN5;P37198	hCG_19665;NUP62;NUP62	HCG19665, isoform CRA_a;Nuclear pore glycoprotein p62;Nuclear pore glycoprotein p62	0	0	142913
A0A024QZQ2;P07602;Q53FJ5;Q59EN5	A0A024QZQ2;P07602;Q53FJ5;Q59EN5	PSAP;PSAP;;	Prosaposin (Variant Gaucher disease and variant metachromatic leukodystrophy), isoform CRA_b;Prosaposin;Prosaposin (Variant Gaucher disease and variant metachromatic leukodystrophy) variant (Fragment);Prosaposin variant (Fragment)	295592	687368	175965
A0A024R017;A0A024RAS2;A0A0U1RR32;A0A0U1RRH7;A3KPC7;A4FTV9;B2R5B3;P04908;P0C0S8;P20671;Q08AJ9;Q16777;Q6FI13;Q7L7L0;Q93077;Q96KK5;Q99878;Q9BTM1	A0A024R017;A0A024RAS2;A0A0U1RR32;A0A0U1RRH7;A3KPC7;A4FTV9;B2R5B3;P04908;P0C0S8;P20671;Q08AJ9;Q16777;Q6FI13;Q7L7L0;Q93077;Q96KK5;Q99878;Q9BTM1	HIST1H2AC;H2AFJ;hCG_2039566;;HIST1H2AH;HIST1H2AK;;H2AC8;H2AC17;H2AC7;HIST1H2AB;H2AC20;H2AC19;H2AC25;H2AC6;H2AC12;H2AC14;H2AJ	Histone H2A;Histone H2A;Histone H2A;Histone H2A;Histone H2A;Histone H2A;Histone H2A;Histone H2A type 1-B/E;Histone H2A type 1;Histone H2A type 1-D;Histone H2A;Histone H2A type 2-C;Histone H2A type 2-A;Histone H2A type 3;Histone H2A type 1-C;Histone H2A type 1-H;Histone H2A type 1-J;Histone H2A.J	0	215408	0
A0A024R084;A0A5F9UP49;Q9BRK5	A0A024R084;A0A5F9UP49;Q9BRK5	SDF4	45 kDa calcium-binding protein	541149	154407	747648
A0A024R0A1;B4DTX0;E9PJA2;P09603;Q59H07	A0A024R0A1;B4DTX0;E9PJA2;P09603;Q59H07	CSF1;;CSF1;CSF1;	Macrophage colony-stimulating factor 1;cDNA FLJ60891, highly similar to Macrophage colony-stimulating factor 1;Macrophage colony-stimulating factor 1 (Fragment);Macrophage colony-stimulating factor 1;Colony stimulating factor 1 isoform a variant (Fragment)	0	1170.85	658.794
A0A024R1X8;A0A0S2Z487;P14923	A0A024R1X8;A0A0S2Z487;P14923	JUP	Junction plakoglobin;Junction plakoglobin (Fragment);Junction plakoglobin	49980.6	35768.9	24985.8
A0A024R216;Q9Y3E1	A0A024R216;Q9Y3E1	HDGFRP3;HDGFL3	Hepatoma-derived growth factor, related protein 3, isoform CRA_a;Hepatoma-derived growth factor-related protein 3	157745	0	0
A0A024R2K4;Q9Y608	A0A024R2K4;Q9Y608	LRRFIP2	Leucine rich repeat (In FLII) interacting protein 2, isoform CRA_b;Leucine-rich repeat flightless-interacting protein 2	0	0	16.8529
A0A024R3E3;F8W696;P02647	A0A024R3E3;F8W696;P02647	APOA1	Apolipoprotein A-I, isoform CRA_a;Apolipoprotein A-I;Apolipoprotein A-I	46154060	73925392	48215420
A0A024R462;A0A384MR03;B7ZLE5;P02751;Q6MZF4	A0A024R462;A0A384MR03;B7ZLE5;P02751;Q6MZF4	FN1;;FN1;FN1;DKFZp686K139	Fibronectin;Fibronectin;Fibronectin;Fibronectin;Fibronectin (Fragment)	4.80401	3.74223	90359.7
A0A024R4D5;A0A384NPH9;H7BZE9;H7C024;H7C410;P35052;Q59GI7	A0A024R4D5;A0A384NPH9;H7BZE9;H7C024;H7C410;P35052;Q59GI7	GPC1;;GPC1;GPC1;GPC1;GPC1;	Glypican-1;Glypican-1;Glypican-1 (Fragment);Glypican-1 (Fragment);Glypican-1;Glypican-1;Glypican-1 (Fragment)	4.88106e+06	5690612	957849
A0A024R525;P02794	A0A024R525;P02794	FTH1	Ferritin;Ferritin heavy chain	5491125	6488796	5476652
A0A024R6I6;G3V2W1;Q9UK55	A0A024R6I6;G3V2W1;Q9UK55	SERPINA10	Serpin peptidase inhibitor, clade A (Alpha-1 antiproteinase, antitrypsin), member 10, isoform CRA_b;Protein Z-dependent protease inhibitor;Protein Z-dependent protease inhibitor	619630	356751	343399
A0A024R7D5;H0YMD1;J3KMZ9;P01130;Q9UH51	A0A024R7D5;H0YMD1;J3KMZ9;P01130;Q9UH51	LDLR	Low density lipoprotein receptor (Familial hypercholesterolemia), isoform CRA_b;Low-density lipoprotein receptor;Low-density lipoprotein receptor (Fragment);Low-density lipoprotein receptor;Low density lipoprotein receptor (Fragment)	290134	181067	371430
A0A024R8S5;A0A7P0TA35;A0A7P0TA71;A0A7P0TB26;P07237	A0A024R8S5;A0A7P0TA35;A0A7P0TA71;A0A7P0TB26;P07237	P4HB	Protein disulfide-isomerase	0	0	2178.15
A0A024R944;A0A0K0Q2Z1;A0A2S0BDD1;A0A3S8NFS6;P01008	A0A024R944;A0A0K0Q2Z1;A0A2S0BDD1;A0A3S8NFS6;P01008	SERPINC1;SERPINC1;ATIII-R2;;SERPINC1	Antithrombin-III;Antithrombin-III;Antithrombin-III;ATIII-T1;Antithrombin-III	16979322	15950265	20408876
A0A024R971;A0A3B3IRN5;Q06828	A0A024R971;A0A3B3IRN5;Q06828	FMOD	Fibromodulin	10805034	11126977	10818675
A0A024R9Q1;A0PJG0;P07996	A0A024R9Q1;A0PJG0;P07996	THBS1	Thrombospondin 1, isoform CRA_a;THBS1 protein (Fragment);Thrombospondin-1	128877	0	195160
A0A024RAL1;A0A024RAQ9;P13611;Q59FG9	A0A024RAL1;A0A024RAQ9;P13611;Q59FG9	CSPG2;CSPG2;VCAN;	Chondroitin sulfate proteoglycan 2 (Versican), isoform CRA_c;Chondroitin sulfate proteoglycan 2 (Versican), isoform CRA_b;Versican core protein;Chondroitin sulfate proteoglycan 2 (Versican) variant (Fragment)	782758	678118	557846
A0A024RAM4;A2BDK6;P46821	A0A024RAM4;A2BDK6;P46821	MAP1B	Microtubule-associated protein 1B, isoform CRA_b;Microtubule-associated protein 1B;Microtubule-associated protein 1B	0	0	2.19485e+06
A0A024RAQ1;A0A024RAV4;P16989	A0A024RAQ1;A0A024RAV4;P16989	CSDA;CSDA;YBX3	Cold shock domain protein A, isoform CRA_a;Cold shock domain protein A, isoform CRA_b;Y-box-binding protein 3	59.9158	0	0
A0A024RAY2;B2RA03;P05783	A0A024RAY2;B2RA03;P05783	KRT18;;KRT18	Keratin 18, isoform CRA_a;cDNA, FLJ94640, highly similar to Homo sapiens keratin 18 (KRT18), mRNA;Keratin, type I cytoskeletal 18	0	127675	129705
A0A024RBB7;B7Z2V4;F5H4R6;F8VUX1;F8VXI6;F8VY35;F8W020;F8W0J6;H0YIV4;P55209	A0A024RBB7;B7Z2V4;F5H4R6;F8VUX1;F8VXI6;F8VY35;F8W020;F8W0J6;H0YIV4;P55209	NAP1L1;;NAP1L1;NAP1L1;NAP1L1;NAP1L1;NAP1L1;NAP1L1;NAP1L1;NAP1L1	Nucleosome assembly protein 1-like 1, isoform CRA_a;cDNA FLJ60539, highly similar to Nucleosome assembly protein 1-like 1;Nucleosome assembly protein 1-like 1;Nucleosome assembly protein 1-like 1 (Fragment);Nucleosome assembly protein 1-like 1 (Fragment);Nucleosome assembly protein 1-like 1 (Fragment);Nucleosome assembly protein 1-like 1 (Fragment);Nucleosome assembly protein 1-like 1;Nucleosome …	0	0	39947.2
A0A024RBB9;B4E2K7;Q9Y2U8	A0A024RBB9;B4E2K7;Q9Y2U8	LEMD3;;LEMD3	LEM domain containing 3, isoform CRA_a;cDNA FLJ56676, highly similar to Inner nuclear membrane protein Man1;Inner nuclear membrane protein Man1	0	0	18068.5
A0A024RC42;A0A6Q8PF58;C9J126;C9JMH2;P19022	A0A024RC42;A0A6Q8PF58;C9J126;C9JMH2;P19022	CDH2	Cadherin-2;Cadherin-2;Cadherin-2;Cadherin-2 (Fragment);Cadherin-2	101333	1.28032e+06	1.1136e+06
A0A024RCJ2;P06899;P23527;P33778;Q16778;Q8N257	A0A024RCJ2;P06899;P23527;P33778;Q16778;Q8N257	HIST1H2BJ;H2BC11;H2BC17;H2BC3;H2BC21;H2BC26	Histone H2B;Histone H2B type 1-J;Histone H2B type 1-O;Histone H2B type 1-B;Histone H2B type 2-E;Histone H2B type 3-B	22188.4	0	0
A0A024RD80;P08238;Q6PK50	A0A024RD80;P08238;Q6PK50	HSP90AB1	Heat shock protein 90kDa alpha (Cytosolic), class B member 1, isoform CRA_a;Heat shock protein HSP 90-beta;HSP90AB1 protein (Fragment)	0	0	18590
A0A024RDE2;A0A024RDE6;A0A024RDJ0;A6XMV6;B7Z351;C4B6Q2;F2YQ21;P10451;Q3LGB0	A0A024RDE2;A0A024RDE6;A0A024RDJ0;A6XMV6;B7Z351;C4B6Q2;F2YQ21;P10451;Q3LGB0	SPP1;SPP1;SPP1;;SPP1;opn;;SPP1;SPP1	Secreted phosphoprotein 1 (Osteopontin, bone sialoprotein I, early T-lymphocyte activation 1), isoform CRA_b;Secreted phosphoprotein 1 (Osteopontin, bone sialoprotein I, early T-lymphocyte activation 1), isoform CRA_c;Secreted phosphoprotein 1 (Osteopontin, bone sialoprotein I, early T-lymphocyte activation 1), isoform CRA_a;Secreted phosphoprotein 1;Secreted phosphoprotein 1 variant 6;Osteoponti…	4.87233e+06	1.85284e+06	4426565
A0A024RDQ0;A0A024RDS1;A0A0A0MSM0;B4DF68;B4DY72;Q92598	A0A024RDQ0;A0A024RDS1;A0A0A0MSM0;B4DF68;B4DY72;Q92598	HSPH1;HSPH1;HSPH1;;;HSPH1	Heat shock protein 105 kDa;Heat shock protein 105 kDa;Heat shock protein 105 kDa;cDNA FLJ55325, highly similar to Heat-shock protein 105 kDa;cDNA FLJ52360, highly similar to Heat-shock protein 105 kDa;Heat shock protein 105 kDa	939474	0	0
A0A024RDY3;B3KRY3;P11279	A0A024RDY3;B3KRY3;P11279	LAMP1;;LAMP1	Lysosomal-associated membrane protein 1, isoform CRA_a;cDNA FLJ35079 fis, clone PLACE6005283, highly similar to Lysosome-associated membrane glycoprotein 1;Lysosome-associated membrane glycoprotein 1	83334	0	0
A0A087WT59	A0A087WT59	TTR	Transthyretin	327298	0	0
A0A087WTE4;A0A087WTF6;A0A087WV75;A0A087WWD4;A0A087WX77;H7BYX6;P13591	A0A087WTE4;A0A087WTF6;A0A087WV75;A0A087WWD4;A0A087WX77;H7BYX6;P13591	NCAM1	Neural cell adhesion molecule 1	210461	662607	349421
A0A087WUV8;A0A7P0T8A7;A0A7P0TA85;A0A7P0TB04;B4DNE1;B4DY23;I3L192;P35613;Q54A51;R4GMX5	A0A087WUV8;A0A7P0T8A7;A0A7P0TA85;A0A7P0TB04;B4DNE1;B4DY23;I3L192;P35613;Q54A51;R4GMX5	BSG;BSG;BSG;BSG;;;BSG;BSG;hEMMPRIN;BSG	Basigin;Basigin;Basigin;Basigin;Basigin;Basigin;Basigin (Fragment);Basigin;Basigin;Basigin (Fragment)	92516.2	198019	0
A0A087WW43;B4DPQ4;E7ET33;Q06033	A0A087WW43;B4DPQ4;E7ET33;Q06033	ITIH3;;ITIH3;ITIH3	Inter-alpha-trypsin inhibitor heavy chain H3;cDNA FLJ60769, highly similar to Inter-alpha-trypsin inhibitor heavy chain H3;Inter-alpha-trypsin inhibitor heavy chain H3;Inter-alpha-trypsin inhibitor heavy chain H3	753746	516003	563810
A0A087X054;A0A384P5T6;A0A494C039;B3KXH0;B7Z2N4;B7Z766;K7EQK2;Q9Y4L1	A0A087X054;A0A384P5T6;A0A494C039;B3KXH0;B7Z2N4;B7Z766;K7EQK2;Q9Y4L1	HYOU1;;HYOU1;;;;HYOU1;HYOU1	Hypoxia up-regulated protein 1;Epididymis secretory sperm binding protein;Hypoxia up-regulated protein 1;cDNA FLJ45395 fis, clone BRHIP3027191, highly similar to 150 kDa oxygen-regulated protein (Orp150);cDNA FLJ56074, highly similar to 150 kDa oxygen-regulated protein (Orp150);cDNA FLJ54564, highly similar to 150 kDa oxygen-regulated protein (Orp150);Hypoxia up-regulated protein 1;Hypoxia up-reg…	44721.1	233626	177384
A0A087X0T8;A0A087X1W8;A0A0A0MTJ8;A0A4Z1;Q9BY67;X5D7A8;X5D8W0;X5DNF2;X5DQR8;X5DQS5	A0A087X0T8;A0A087X1W8;A0A0A0MTJ8;A0A4Z1;Q9BY67;X5D7A8;X5D8W0;X5DNF2;X5DQR8;X5DQS5	CADM1	Cell adhesion molecule 1;Cell adhesion molecule 1;Cell adhesion molecule 1 (Fragment);CADM1 protein;Cell adhesion molecule 1;Cell adhesion molecule 1 isoform A (Fragment);Cell adhesion molecule 1 isoform D (Fragment);Cell adhesion molecule 1 isoform A (Fragment);Cell adhesion molecule 1 isoform B (Fragment);Cell adhesion molecule 1 (Fragment)	1.13243e+06	458993	1663774
A0A087X1L8;A0N0L8;B7Z1W8;B7ZA28;B7ZA61;K4DIA0;O75144	A0A087X1L8;A0N0L8;B7Z1W8;B7ZA28;B7ZA61;K4DIA0;O75144	LOC102723996;ICOSLG;;;;ICOSLG;ICOSLG	Ig-like domain-containing protein;Inducible T-cell co-stimulator ligand;cDNA FLJ50464, highly similar to ICOS ligand;cDNA, FLJ79042, highly similar to ICOS ligand;cDNA, FLJ79075, highly similar to ICOS ligand;ICOS ligand;ICOS ligand	4466397	8368410	3.98299e+06
A0A0A0MSA9;A0A0C4DG49;A8K4I1;B3KSS4;P15151	A0A0A0MSA9;A0A0C4DG49;A8K4I1;B3KSS4;P15151	PVR;PVR;;;PVR	Poliovirus receptor;Poliovirus receptor;cDNA FLJ75404;cDNA FLJ36858 fis, clone ASTRO2015185, highly similar to POLIOVIRUS RECEPTOR;Poliovirus receptor	0	0	856534
A0A0A0MSI0;A0A384NPQ2;B2R4P2;Q06830	A0A0A0MSI0;A0A384NPQ2;B2R4P2;Q06830	PRDX1;;;PRDX1	Peroxiredoxin-1 (Fragment);Epididymis secretory sperm binding protein;cDNA, FLJ92164, highly similar to Homo sapiens peroxiredoxin 1 (PRDX1), mRNA;Peroxiredoxin-1	280480	0	0
A0A0A0N0L2;A0A0A0N0L5;A0A494BZU0;D6RH03;P40189;Q17RA0;Q5FC05	A0A0A0N0L2;A0A0A0N0L5;A0A494BZU0;D6RH03;P40189;Q17RA0;Q5FC05	IL6ST	IL6ST isoform 4;IL6ST isoform 3;Interleukin-6 receptor subunit beta;Interleukin-6 receptor subunit beta;Interleukin-6 receptor subunit beta;Interleukin 6 signal transducer (Gp130, oncostatin M receptor);IL6ST nirs variant 3	82514.2	92127.4	216735
A0A0B4J2C3;A0A0P1J1R0;P13693;Q5W0H4	A0A0B4J2C3;A0A0P1J1R0;P13693;Q5W0H4	TPT1;seTCTP;TPT1;TPT1	Translationally-controlled tumor protein	0	0	23464.2
A0A0C4DGH0;A8K9J6;B4DK26;Q5ZPR3	A0A0C4DGH0;A8K9J6;B4DK26;Q5ZPR3	CD276;;;CD276	CD276 antigen;cDNA FLJ78024;cDNA FLJ61301, highly similar to CD276 antigen;CD276 antigen	244591	0	15223.1
A0A0G2JPA8;A0A0J9YY65;C9JMH6;P08697	A0A0G2JPA8;A0A0J9YY65;C9JMH6;P08697	SERPINF2	Alpha-2-antiplasmin;Alpha-2-antiplasmin (Fragment);Alpha-2-antiplasmin (Fragment);Alpha-2-antiplasmin	17055236	13815547	10401736
A0A0K0K1L8;A0A384NQ35;Q06323	A0A0K0K1L8;A0A384NQ35;Q06323	HEL-S-129m;;PSME1	Epididymis secretory sperm binding protein Li 129m;Epididymis secretory sperm binding protein (Fragment);Proteasome activator complex subunit 1	26.966	0	0
A0A0K2BMD8;A0A1K0GXZ1;A0A1S5UZ39;A0A385HVY8;A0A385HW02;A0A385HW21;A0A385HW63;D1MGQ2;I1VZV6;P69905	A0A0K2BMD8;A0A1K0GXZ1;A0A1S5UZ39;A0A385HVY8;A0A385HW02;A0A385HW21;A0A385HW63;D1MGQ2;I1VZV6;P69905	HBA2;GLNC1;HBA2;HBA2;HBA2;HBA2;HBA2;HBA2;HBA1;HBA2	Mutant hemoglobin alpha 2 globin chain;Globin C1;Hemoglobin subunit alpha;Mutant hemoglobin subunit alpha 2;Mutant hemoglobin subunit alpha 2;Mutant hemoglobin subunit alpha 2;Mutant hemoglobin subunit alpha 2;Alpha-1-globin;Hemoglobin alpha 1;Hemoglobin subunit alpha	8968577	22181444	15746869
A0A0S2Z3D5;A0A0S2Z3V0;A0A346DBY2;J9ZVQ3;P02649	A0A0S2Z3D5;A0A0S2Z3V0;A0A346DBY2;J9ZVQ3;P02649	APOE	Apolipoprotein E isoform 1 (Fragment);Apolipoprotein E isoform 2 (Fragment);Apolipoprotein E (Fragment);Apolipoprotein E (Fragment);Apolipoprotein E	5364724	10739868	2.83203e+06
A0A0S2Z3Q6;A0A1B0RPQ4;A0A3B3ISD1;A0A804HIF1;A0A8I3B1S4;C1KBH7;D3DSX4;P11362	A0A0S2Z3Q6;A0A1B0RPQ4;A0A3B3ISD1;A0A804HIF1;A0A8I3B1S4;C1KBH7;D3DSX4;P11362	FGFR1	Fibroblast growth factor receptor 1 (Fragment);Fibroblast growth factor receptor;Fibroblast growth factor receptor;Fibroblast growth factor receptor;Fibroblast growth factor receptor;Fibroblast growth factor receptor 1 isoform 3;Fibroblast growth factor receptor 1 (Fms-related tyrosine kinase 2, Pfeiffer syndrome), isoform CRA_f;Fibroblast growth factor receptor 1	603425	797759	349272
A0A0S2Z3Y1;B3KP88;B4DDG4;B4DVE1;Q08380	A0A0S2Z3Y1;B3KP88;B4DDG4;B4DVE1;Q08380	LGALS3BP;;;;LGALS3BP	Galectin-3-binding protein (Fragment);Galectin-3-binding protein;cDNA FLJ54583, highly similar to Galectin-3-binding protein;Galectin-3-binding protein;Galectin-3-binding protein	1.56989	15250.1	0
A0A0S2Z428;B4DRR0;P02538	A0A0S2Z428;B4DRR0;P02538	KRT6A;;KRT6A	HCG2039812, isoform CRA_b (Fragment);cDNA FLJ53910, highly similar to Keratin, type II cytoskeletal 6A;Keratin, type II cytoskeletal 6A	12920239	12868573	18493484
A0A0S2Z4G4;B2RDE1	A0A0S2Z4G4;B2RDE1	TPM3;	Tropomyosin 3 isoform 1 (Fragment);cDNA, FLJ96568, highly similar to Homo sapiens tropomyosin 3 (TPM3), mRNA	2993625	2.01962e+06	4359993
A0A0U2N547;A0A8I5KPX7;A0A8I5KQZ6;A0A8I5KR87;A0A8I5KS03;A0A8I5QKL5;A0A8I5QKP7;A0A8J8Z860;P10721	A0A0U2N547;A0A8I5KPX7;A0A8I5KQZ6;A0A8I5KR87;A0A8I5KS03;A0A8I5QKL5;A0A8I5QKP7;A0A8J8Z860;P10721	KIT	Mast/stem cell growth factor receptor;Mast/stem cell growth factor receptor Kit;Mast/stem cell growth factor receptor;Mast/stem cell growth factor receptor Kit;Mast/stem cell growth factor receptor;Mast/stem cell growth factor receptor;Mast/stem cell growth factor receptor;Mast/stem cell growth factor receptor;Mast/stem cell growth factor receptor Kit	737523	1.37894e+06	1.89887e+06
A0A140VJC8;A0A218KGR2;B4DGD0;E9PG40;H7C0V9;P05067	A0A140VJC8;A0A218KGR2;B4DGD0;E9PG40;H7C0V9;P05067	;APP;;APP;APP;APP	Amyloid-beta A4 protein;Amyloid-beta A4 protein;Amyloid-beta A4 protein;Amyloid-beta A4 protein;Amyloid-beta A4 protein (Fragment);Amyloid-beta precursor protein	751745	1.30318e+06	627511
A0A140VJJ6;C9JC84;C9JEU5;P02679	A0A140VJJ6;C9JC84;C9JEU5;P02679	;FGG;FGG;FGG	Testicular tissue protein Li 70;Fibrinogen gamma chain;Fibrinogen gamma chain;Fibrinogen gamma chain	231478	600044	379401
A0A140VK24;I3L1Q6;J3QKT0;J3QSE5;P04180	A0A140VK24;I3L1Q6;J3QKT0;J3QSE5;P04180	;LCAT;LCAT;LCAT;LCAT	Testicular secretory protein Li 24;Phosphatidylcholine-sterol acyltransferase (Fragment);Phosphatidylcholine-sterol acyltransferase (Fragment);Phosphatidylcholine-sterol acyltransferase (Fragment);Phosphatidylcholine-sterol acyltransferase	193162	220694	27653.8
A0A140VKA6;B4E0U6;B7ZA40;H7C3I1;P50502;Q0IJ56;Q1XBU6;Q8IZP2	A0A140VKA6;B4E0U6;B7ZA40;H7C3I1;P50502;Q0IJ56;Q1XBU6;Q8IZP2	;;;ST13;ST13;ST13;;ST13P4	Testis secretory sperm-binding protein Li 233m;cDNA FLJ53687, highly similar to Hsc70-interacting protein;cDNA, FLJ79054, highly similar to Hsc70-interacting protein;Hsc70-interacting protein (Fragment);Hsc70-interacting protein;ST13 protein (Fragment);Aging-associated protein 14b;Putative protein FAM10A4	3.92841e+06	0	0
A0A140VKF3;I3L1U4;I3L2R7;I3L3Z3;I3L425;I3L4Z0;P36955	A0A140VKF3;I3L1U4;I3L2R7;I3L3Z3;I3L425;I3L4Z0;P36955	;SERPINF1;SERPINF1;SERPINF1;SERPINF1;SERPINF1;SERPINF1	Testis tissue sperm-binding protein Li 70n;Pigment epithelium-derived factor;Pigment epithelium-derived factor (Fragment);Pigment epithelium-derived factor (Fragment);Pigment epithelium-derived factor (Fragment);Pigment epithelium-derived factor (Fragment);Pigment epithelium-derived factor	448691	463799	1.20523e+06
A0A158RFU3;P20962	A0A158RFU3;P20962	PTMS	Parathymosin	94484.9	0	72773.9
A0A161I202;A8K494;B2MV14;B3KSL2;B3VMW0;B4E1V0;B7ZAL5;E7EQB2;E7ER44;P02788;Q2TUW9;Q5EK51;V9HWI4;W8QEY1	A0A161I202;A8K494;B2MV14;B3KSL2;B3VMW0;B4E1V0;B7ZAL5;E7EQB2;E7ER44;P02788;Q2TUW9;Q5EK51;V9HWI4;W8QEY1	LTF;;LTF;;;;;LTF;LTF;LTF;;;HEL110;	Lactotransferrin;Lactotransferrin;Truncated lactoferrin;Lactotransferrin (Fragment);Lactotransferrin;cDNA FLJ54839, highly similar to Lactotransferrin;cDNA, FLJ79229, highly similar to Lactotransferrin;Lactotransferrin (Fragment);Lactotransferrin;Lactotransferrin;Lactotransferrin;Lactotransferrin;Lactotransferrin;Lactotransferrin	8215822	2636901	1.3366e+06
A0A1B0GVI3;P13645	A0A1B0GVI3;P13645	KRT10	Keratin, type I cytoskeletal 10;Keratin, type I cytoskeletal 10	85213104	93530816	75241464
A0A1S5UZ16;D3YTG3;H7C556;Q7Z7G0	A0A1S5UZ16;D3YTG3;H7C556;Q7Z7G0	ABI3BP	Target of Nesh-SH3	400262	1.10042e+06	1.12642e+06
A0A1S5UZ31;Q9H2D6	A0A1S5UZ31;Q9H2D6	TRIOBP	TRIO and F-actin-binding protein	0	60870.4	470201
A0A1U9X793;I2D5I8;I2D5J2;O95445;Q5SRP5	A0A1U9X793;I2D5I8;I2D5J2;O95445;Q5SRP5	;APOM;APOM;APOM;APOM	Apolipoprotein M;Apolipoprotein M (Fragment);Apolipoprotein M (Fragment);Apolipoprotein M;Apolipoprotein M	2.5432e+06	2.29651e+06	2.87765e+06
A0A1U9X796;A0A1U9X799;Q6AZW6;Q99941	A0A1U9X796;A0A1U9X799;Q6AZW6;Q99941	;;ATF6B;ATF6B	ATF6B;ATF6B;Activating transcription factor 6 beta;Cyclic AMP-dependent transcription factor ATF-6 beta	733694	427.628	621592
A0A1W2PQZ2;E9PKE5;E9PKX7;E9PQD5;E9PRV0;Q9UID3	A0A1W2PQZ2;E9PKE5;E9PKX7;E9PQD5;E9PRV0;Q9UID3	VPS51	Vacuolar protein sorting-associated protein 51 homolog;Vacuolar protein sorting-associated protein 51 homolog;Vacuolar protein sorting-associated protein 51 homolog (Fragment);Vacuolar protein sorting-associated protein 51 homolog;Vacuolar protein sorting-associated protein 51 homolog (Fragment);Vacuolar protein sorting-associated protein 51 homolog	12.0166	0	42646.7
A0A2R8Y793;B4E335;B4E3A4;E7EVS6;I3L4N8;P60709;P63261;Q1KLZ0;Q53G76;Q53G99;Q53GK6;Q8WVW5	A0A2R8Y793;B4E335;B4E3A4;E7EVS6;I3L4N8;P60709;P63261;Q1KLZ0;Q53G76;Q53G99;Q53GK6;Q8WVW5	ACTB;;;ACTB;ACTG1;ACTB;ACTG1;PS1TP5BP1;;;;	Actin, cytoplasmic 1 (Fragment);cDNA FLJ52842, highly similar to Actin, cytoplasmic 1;cDNA FLJ57283, highly similar to Actin, cytoplasmic 2;Actin, cytoplasmic 1;Actin, cytoplasmic 2;Actin, cytoplasmic 1;Actin, cytoplasmic 2;HCG15971, isoform CRA_a;Beta actin variant (Fragment);Beta actin variant (Fragment);Beta actin variant (Fragment);ACTB protein (Fragment)	2.2303e+06	2.28592e+06	1.36023e+06
A0A2U3TZL5;E9PNW4;P13987;Q6FHM9	A0A2U3TZL5;E9PNW4;P13987;Q6FHM9	CD59;;CD59;CD59	CD59 glycoprotein (Fragment);CD59 glycoprotein;CD59 glycoprotein;CD59 glycoprotein	605329	217497	814695
A0A384MDM4;P35555	A0A384MDM4;P35555	;FBN1	Epididymis secretory sperm binding protein;Fibrillin-1	1.71151e+06	1.10905e+06	1.62314e+06
A0A384MDP3;P12110	A0A384MDP3;P12110	;COL6A2	Epididymis secretory sperm binding protein;Collagen alpha-2(VI) chain	6.01425e+06	2.65976e+06	3.14849e+06
A0A384MDR3;P02792	A0A384MDR3;P02792	FTL	Ferritin;Ferritin light chain	261513	477998	244202
A0A384MQW4;A0A7I2V3T8;A0A7I2YQA5;A6QRJ1;B3KR70;Q15904	A0A384MQW4;A0A7I2V3T8;A0A7I2YQA5;A6QRJ1;B3KR70;Q15904	;ATP6AP1;ATP6AP1;ATP6AP1;;ATP6AP1	Epididymis secretory sperm binding protein;V-type proton ATPase subunit S1;V-type proton ATPase subunit S1;V-type proton ATPase subunit S1 (Fragment);cDNA FLJ33764 fis, clone BRCOC2000360, highly similar to Vacuolar ATP synthase subunit S1;V-type proton ATPase subunit S1	11467.8	182729	3.70627
A0A384MR27;P09382	A0A384MR27;P09382	;LGALS1	Galectin;Galectin-1	2.05183e+06	0	0
A0A384N669;P51884	A0A384N669;P51884	;LUM	Lumican	174026928	161570176	118494736
A0A384NKM6;B4DPN0;D9IWP9;J3KS17;P02749	A0A384NKM6;B4DPN0;D9IWP9;J3KS17;P02749	APOH;;;APOH;APOH	Beta-2-glycoprotein 1;Beta-2-glycoprotein 1;Beta-2-glycoprotein 1 (Fragment);Beta-2-glycoprotein 1 (Fragment);Beta-2-glycoprotein 1	1.91233e+06	2.90441e+06	1.43244e+06
A0A384NKS6;P10909	A0A384NKS6;P10909	;CLU	Clusterin	783289	1.4129e+06	971652
A0A384NPH0;Q03252	A0A384NPH0;Q03252	;LMNB2	Epididymis secretory sperm binding protein;Lamin-B2	0	0	228596
A0A384P5H7;P12109	A0A384P5H7;P12109	COL6A1	Collagen, type VI, alpha 1, isoform CRA_b;Collagen alpha-1(VI) chain	550916	982081	848066
A0A384P5V3;M0R0C6;Q92945	A0A384P5V3;M0R0C6;Q92945	;KHSRP;KHSRP	Epididymis secretory sperm binding protein;Far upstream element-binding protein 2;Far upstream element-binding protein 2	0	0	0.019405
A0A385KNS5;B4DN59;P16070	A0A385KNS5;B4DN59;P16070	CD44;;CD44	CD44 antigen	12103198	22885912	10540993
A0A3B3IRL6;A0A8Q3WKU1;A0A8Q3WKU2;Q6UXH8	A0A3B3IRL6;A0A8Q3WKU1;A0A8Q3WKU2;Q6UXH8	CCBE1	Collagen and calcium-binding EGF domain-containing protein 1	85711.5	84672.8	17811.1
A0A3G1HEF1;P05543	A0A3G1HEF1;P05543	;SERPINA7	Mutant serpin family A member 7;Thyroxine-binding globulin	3497107	2.09468e+06	5.40978e+06
A0A494C018;P01133;Q6QBS2	A0A494C018;P01133;Q6QBS2	EGF	Pro-epidermal growth factor;Pro-epidermal growth factor;Epidermal growth factor (Fragment)	0	0	1.72295e+06
A0A5C2G716	A0A5C2G716		IGH c427_heavy__IGHV3-74_IGHD7-27_IGHJ4 (Fragment)	13495911	0	0
A0A5F9UY30;O43493	A0A5F9UY30;O43493	TGOLN2	Trans-Golgi network integral membrane protein 2	166393	0	0
A0A5K1VW97;H0YMF1;P16112;Q6PID9	A0A5K1VW97;H0YMF1;P16112;Q6PID9	ACAN	Aggrecan core protein;Aggrecan core protein;Aggrecan core protein;Aggrecan	1.71616e+06	2.70251e+06	3002084
A0A650AXN9;Q03692	A0A650AXN9;Q03692	COL10A1	Collagen type X alpha 1 chain;Collagen alpha-1(X) chain	5.71429e+06	1.92043e+06	8667450
A0A7I2V2F9;E7EUI6;H7C4K3;P05556	A0A7I2V2F9;E7EUI6;H7C4K3;P05556	ITGB1	Integrin beta;Integrin beta;Integrin beta;Integrin beta-1	886450	1.3334e+06	581679
A0A7I2V3W3;A0A7I2V4B3;A0A7I2YQ97;Q13443	A0A7I2V3W3;A0A7I2V4B3;A0A7I2YQ97;Q13443	ADAM9	Disintegrin and metalloproteinase domain-containing protein 9	1.46319e+06	1.59205e+06	1.15206e+06
A0A7P0SNB0;D0PNI2;P28300;Q96PQ9	A0A7P0SNB0;D0PNI2;P28300;Q96PQ9	LOX	Protein-lysine 6-oxidase;Lysyl oxidase homolog;Protein-lysine 6-oxidase;Lysyl oxidase homolog	45967.9	1.67235e+06	1.58826e+06
A0A7P0T937;A0A7P0TAE9;A0A7P0TB65;P27824	A0A7P0T937;A0A7P0TAE9;A0A7P0TB65;P27824	CANX	Calnexin	0	149300	355413
A0A804HL01;E7ENY0;E7EV99;P35611	A0A804HL01;E7ENY0;E7EV99;P35611	ADD1	Alpha-adducin	320521	0	0
A1YVW6;A2A2V1;B2R5Q9;B4DJ65;D4P3Q7;O75942;P04156;Q53YK7;Q6FGN5;Q6FGR8;Q6SES1;Q86XR1	A1YVW6;A2A2V1;B2R5Q9;B4DJ65;D4P3Q7;O75942;P04156;Q53YK7;Q6FGN5;Q6FGR8;Q6SES1;Q86XR1	PRNP;PRNP;;;PRNP;PRNP;PRNP;PRNP;PRNP;PRNP;PRNP;PRNP	Major prion protein;Major prion protein (Fragment);Major prion protein;Major prion protein;Major prion protein (Fragment);Major prion protein;Major prion protein;Major prion protein;Major prion protein (Fragment);Major prion protein;Major prion protein;Major prion protein (Fragment)	0	14.5808	7.87362
A2RTY6;D3DRR6;P19823;Q5T985	A2RTY6;D3DRR6;P19823;Q5T985	ITIH2	Inter-alpha (Globulin) inhibitor H2;Inter-alpha (Globulin) inhibitor H2, isoform CRA_a;Inter-alpha-trypsin inhibitor heavy chain H2;Inter-alpha-trypsin inhibitor heavy chain H2	14748053	15600144	15092346
A2VCK8;P62328	A2VCK8;P62328	TMSB4X	Thymosin beta;Thymosin beta-4	4177985	4238609	5105489
A3KPE2;B0YIW2;P02656	A3KPE2;B0YIW2;P02656	APOC3	Apolipoprotein C-III	3.3018e+06	5225310	3058812
A3R0T8;B2R984;P10412;Q4VB24	A3R0T8;B2R984;P10412;Q4VB24	HIST1H1E;;H1-4;HIST1H1E	Histone 1, H1e;cDNA, FLJ94268, highly similar to Homo sapiens histone 1, H1e (HIST1H1E), mRNA;Histone H1.4;Histone cluster 1, H1e	0	0	89144.8
A4GW21;Q2LC89;Q9BQ51	A4GW21;Q2LC89;Q9BQ51	;PDL2;PDCD1LG2	Programmed cell death ligand 2;PD-1-ligand 2 (Fragment);Programmed cell death 1 ligand 2	206543	0	0
A6H8L4;A8K1B4;B2RNB2;P78536;Q6P5T8	A6H8L4;A8K1B4;B2RNB2;P78536;Q6P5T8	ADAM17;;ADAM17;ADAM17;ADAM17	ADAM17 protein;cDNA FLJ77013, highly similar to Homo sapiens ADAM metallopeptidase domain 17 (tumor necrosis factor, alpha, converting enzyme), mRNA;ADAM metallopeptidase domain 17;Disintegrin and metalloproteinase domain-containing protein 17;ADAM17 protein	0	0	107776
A6NLG9;A8K7E0;B3KS75;B4DDQ2;P21810;Q53FI4;Q53HU6	A6NLG9;A8K7E0;B3KS75;B4DDQ2;P21810;Q53FI4;Q53HU6	;;;;BGN;;	Biglycan;Biglycan;Biglycan;Biglycan;Biglycan;Biglycan (Fragment);Biglycan (Fragment)	0	0	1.60995
A6XGL1;A6XMH1;E9KL36;P02766	A6XGL1;A6XMH1;E9KL36;P02766	;;TTR;TTR	Transthyretin	362257	1.08595e+06	76925.6
A6XGL2;F6MZK5;I3WAC9;P01308	A6XGL2;F6MZK5;I3WAC9;P01308	INS	Insulin;Insulin (Fragment);Insulin;Insulin	57299848	80609256	73660016
A8K061;Q9Y5C1	A8K061;Q9Y5C1	;ANGPTL3	cDNA FLJ77880, highly similar to Homo sapiens angiopoietin-like 3, mRNA;Angiopoietin-related protein 3	163256	258074	222065
A8K0R3;B4DI63;P20774;Q7Z532	A8K0R3;B4DI63;P20774;Q7Z532	OGN;;OGN;	Mimecan	3.44865e+06	2.56664e+06	3.25544e+06
A8K4R1;Q6P4E1	A8K4R1;Q6P4E1	;GOLM2	Protein GOLM2	338550	0	560238
A8K674;B2RDW1;B4DV12;F5GXK7;F5GYU3;F5H265;F5H2Z3;F5H388;F5H6Q2;F5H747;J3QKN0;J3QS39;J3QTR3;L8B196;L8B4I8;L8B4J3;L8B4M0;L8B4R0;L8B4Z6;P0CG47;P0CG48;P62979;P62987;Q3MIH3;Q59EM9;Q5PY61;Q5RKT7;Q5U5U6;Q5UGI3;Q66K58;Q96C32;Q96H31;Q96MH4;Q9UFQ0	A8K674;B2RDW1;B4DV12;F5GXK7;F5GYU3;F5H265;F5H2Z3;F5H388;F5H6Q2;F5H747;J3QKN0;J3QS39;J3QTR3;L8B196;L8B4I8;L8B4J3;L8B4M0;L8B4R0;L8B4Z6;P0CG47;P0CG48;P62979;P62987;Q3MIH3;Q59EM9;Q5PY61;Q5RKT7;Q5U5U6;Q5UGI3;Q66K58;Q96C32;Q96H31;Q96MH4;Q9UFQ0	;HEL112;UBB;UBC;UBC;UBC;UBC;UBC;UBC;UBC;UBB;UBB;RPS27A;UbC;UbC;UbC;UbC;UbC;UbC;UBB;UBC;RPS27A;UBA52;UBA52;;UBC;RPS27A;UBB;UBC;;UBC;UBC;;DKFZp434K0435	cDNA FLJ75516, highly similar to Xenopus tropicalis ubiquitin C, mRNA;Ubiquitin-40S ribosomal protein S27a;Polyubiquitin-B;Polyubiquitin-C (Fragment);Polyubiquitin-C (Fragment);Polyubiquitin-C (Fragment);Polyubiquitin-C (Fragment);Polyubiquitin-C (Fragment);Polyubiquitin-C (Fragment);Polyubiquitin-C (Fragment);Polyubiquitin-B (Fragment);Polyubiquitin-B (Fragment);Ubiquitin-40S ribosomal protein S…	574155	252399	414533
A8K6K4;C9J1D9;Q9NPH3	A8K6K4;C9J1D9;Q9NPH3	;IL1RAP;IL1RAP	cDNA FLJ77565, highly similar to Homo sapiens interleukin 1 receptor accessory protein (IL1RAP), transcript variant 1, mRNA;Interleukin-1 receptor accessory protein (Fragment);Interleukin-1 receptor accessory protein	1.29093e+06	917452	1.71042e+06
A8K7J3;Q15075	A8K7J3;Q15075	;EEA1	cDNA FLJ75535, highly similar to Homo sapiens early endosome antigen 1, 162kD (EEA1), mRNA (Fragment);Early endosome antigen 1	0	0	2.00244e+06
A8K7Q1;Q02818	A8K7Q1;Q02818	;NUCB1	Nucleobindin-1	1.74525e+06	1.79982e+06	3.18788e+06
A8K9L8;G5EA42;H0YMA2;Q4G0W6;Q9NZR1	A8K9L8;G5EA42;H0YMA2;Q4G0W6;Q9NZR1	;TMOD2;TMOD2;TMOD2;TMOD2	cDNA FLJ76964, highly similar to Homo sapiens tropomodulin 2 (neuronal) (TMOD2), mRNA;Tropomodulin 2 (Neuronal), isoform CRA_a;Tropomodulin-2 (Fragment);TMOD2 protein;Tropomodulin-2	695727	1906057	1538630
B0YJA4;E9PIM6;E9PNQ8;P04216;Q59GA0	B0YJA4;E9PIM6;E9PNQ8;P04216;Q59GA0	THY1;THY1;THY1;THY1;	Thy-1 membrane glycoprotein;Thy-1 membrane glycoprotein (Fragment);Thy-1 membrane glycoprotein (Fragment);Thy-1 membrane glycoprotein;Thy-1 membrane glycoprotein (Fragment)	0	114762	448614
B2R7N9;Q99983	B2R7N9;Q99983	;OMD	cDNA, FLJ93532, highly similar to Homo sapiens osteomodulin (OMD), mRNA;Osteomodulin	5664490	7.34255e+06	5353956
B2R8R5;Q13263	B2R8R5;Q13263	;TRIM28	cDNA, FLJ94025, highly similar to Homo sapiens tripartite motif-containing 28 (TRIM28), mRNA;Transcription intermediary factor 1-beta	9.23043	0	7.29255
B2R950;F5GXY0;P20742	B2R950;F5GXY0;P20742	;PZP;PZP	cDNA, FLJ94213, highly similar to Homo sapiens pregnancy-zone protein (PZP), mRNA;Pregnancy zone protein;Pregnancy zone protein	287609	340195	147564
B2RAN2;O95497	B2RAN2;O95497	;VNN1	cDNA, FLJ95014, highly similar to Homo sapiens vanin 1 (VNN1), mRNA;Pantetheinase	3.89695e+06	7252034	4.29438e+06
B2RDW0;B4DJ51;P0DP23;P0DP24;P0DP25	B2RDW0;B4DJ51;P0DP23;P0DP24;P0DP25	;HEL-S-72;CALM1;CALM2;CALM3	cDNA, FLJ96792, highly similar to Homo sapiens calmodulin 2 (phosphorylase kinase, delta) (CALM2), mRNA;Calmodulin 1 (Phosphorylase kinase, delta), isoform CRA_a;Calmodulin-1;Calmodulin-2;Calmodulin-3	4400310	3.5931e+06	3.64852e+06
B3KNK9;Q8NBJ4	B3KNK9;Q8NBJ4	HEL46;GOLM1	Epididymis luminal protein 46;Golgi membrane protein 1	5.39094e+06	5798883	5.1537e+06
B3KPS3;B3KT06;P68363	B3KPS3;B3KT06;P68363	;;TUBA1B	Tubulin alpha chain;Tubulin alpha chain;Tubulin alpha-1B chain	0	0	7492.73
B3KQF5;O43852;Q6IAW5	B3KQF5;O43852;Q6IAW5	;CALU;CALU	Calumenin	565291	178139	341270
B3KUI0;B4DTS6;B4E336;P48960	B3KUI0;B4DTS6;B4E336;P48960	;;;ADGRE5	cDNA FLJ39945 fis, clone SPLEN2023977, highly similar to Homo sapiens CD97 antigen (CD97), transcript variant 2, mRNA;cDNA FLJ54117, highly similar to CD97 antigen;cDNA FLJ53287, highly similar to CD97 antigen;Adhesion G protein-coupled receptor E5	125485	39048.3	55123.4
B4DM33;Q15691	B4DM33;Q15691	;MAPRE1	cDNA FLJ52068, highly similar to Microtubule-associated protein RP/EB family member 1;Microtubule-associated protein RP/EB family member 1	0	0	78018.8
B4DMW9;B4DMX4;J3KMX3;P02771	B4DMW9;B4DMX4;J3KMX3;P02771	;;AFP;AFP	cDNA FLJ51509, highly similar to Alpha-fetoprotein;cDNA FLJ57154, highly similar to Alpha-fetoprotein;Alpha-fetoprotein;Alpha-fetoprotein	586341	1.62114e+06	316282
B4DNS6;B4DV72;B4E397;B7ZB68;Q14515;Q8N4S1	B4DNS6;B4DV72;B4E397;B7ZB68;Q14515;Q8N4S1	;;;;SPARCL1;SPARCL1	cDNA FLJ54278, highly similar to SPARC-like protein 1;cDNA FLJ54387, moderately similar to SPARC-like protein 1;cDNA FLJ55140, highly similar to SPARC-like protein 1;cDNA, FLJ79432, highly similar to SPARC-like protein 1;SPARC-like protein 1;SPARC-like protein 1	586145	758271	205227
B4DPP8;B4E1C2;D3DNU8;P01042;Q05CF8	B4DPP8;B4E1C2;D3DNU8;P01042;Q05CF8	;KNG1;KNG1;KNG1;KNG1	cDNA FLJ53075, highly similar to Kininogen-1;Kininogen 1, isoform CRA_b;Kininogen 1, isoform CRA_a;Kininogen-1;KNG1 protein	25265980	48466636	13204528
B4DQB2;E9PL76;E9PQ75;E9PRD9;J3KQ55;J3KQQ7;J3QT03;O95498	B4DQB2;E9PL76;E9PQ75;E9PRD9;J3KQ55;J3KQQ7;J3QT03;O95498	VNN2	Pantetheine hydrolase VNN2;Pantetheine hydrolase VNN2 (Fragment);Pantetheine hydrolase VNN2;Pantetheine hydrolase VNN2 (Fragment);Pantetheine hydrolase VNN2;Pantetheine hydrolase VNN2;Pantetheine hydrolase VNN2;Pantetheine hydrolase VNN2	31033194	23882928	24793582
B4DUN9;D3DQ79;H7BXY5;Q0ZGT2	B4DUN9;D3DQ79;H7BXY5;Q0ZGT2	;NEXN;NEXN;NEXN	cDNA FLJ56909, highly similar to Rattus norvegicus nexilin (Nexn), transcript variant s, mRNA;Nexilin (F actin binding protein), isoform CRA_b;Nexilin (Fragment);Nexilin	0	0	36647.6
B4E2S7;P13473	B4E2S7;P13473	;LAMP2	cDNA FLJ58780, highly similar to Homo sapiens lysosomal-associated membrane protein 2 (LAMP2), transcript variant LAMP2B, mRNA;Lysosome-associated membrane glycoprotein 2	1413071	1.22338e+06	2.69011e+06
B4E343;Q9BVJ6	B4E343;Q9BVJ6	;UTP14A	cDNA FLJ54249, highly similar to U3 small nucleolar RNA-associated protein 14 homolog A;U3 small nucleolar RNA-associated protein 14 homolog A	0	0	229644
B4E367;Q6UX71	B4E367;Q6UX71	;PLXDC2	cDNA FLJ61564, highly similar to Plexin domain-containing protein 2;Plexin domain-containing protein 2	1.28967e+06	1751612	1746984
B4E3P1	B4E3P1		cDNA FLJ57036, highly similar to Homo sapiens tropomyosin 2 (beta) (TPM2), transcript variant 2, mRNA	2950877	3.67225e+06	1.62193e+06
B7Z553;D9ZGG2;P04004	B7Z553;D9ZGG2;P04004	;VTN;VTN	cDNA FLJ51266, highly similar to Vitronectin;Vitronectin;Vitronectin	696493	303503	882333
B7Z8Q2;P02765	B7Z8Q2;P02765	;AHSG	Alpha-2-HS-glycoprotein	193720672	194293616	152699104
B7Z8R6;P02760	B7Z8R6;P02760	;AMBP	Protein AMBP	15794292	21063570	13839711
B7Z9B1;P55290	B7Z9B1;P55290	;CDH13	Cadherin-13	468982	420482	544974
B7ZW00;D9ZGF2;P12111;Q59F25;Q6MZG6;Q8N4Z1	B7ZW00;D9ZGF2;P12111;Q59F25;Q6MZG6;Q8N4Z1	COL6A3;COL6A3;COL6A3;;DKFZp686D23123;	COL6A3 protein;Collagen, type VI, alpha 3;Collagen alpha-3(VI) chain;Alpha 3 type VI collagen isoform 5 variant (Fragment);Uncharacterized protein DKFZp686D23123;Similar to collagen, type VI, alpha 3 (Fragment)	96131.9	0	31671.9
B8ZZQ6;P06454;Q53S24;Q86YS2;Q8TBK9;V9HVW6	B8ZZQ6;P06454;Q53S24;Q86YS2;Q8TBK9;V9HVW6	PTMA;PTMA;PTMAP7;;PTMA;	Prothymosin alpha;Prothymosin alpha;Prothymosin, alpha;Prothymosin alpha protein;Prothymosin, alpha;Prothymosin alpha	1.33173e+06	2435412	1.44476e+06
C9IZG4;O60888	C9IZG4;O60888	CUTA	Protein CutA	98514.1	109902	119664
D3DQH8;P09486	D3DQH8;P09486	SPARC	SPARC	8532209	7536629	6.64273e+06
D3DSM4;D3DSM5;P39060	D3DSM4;D3DSM5;P39060	COL18A1	Collagen, type XVIII, alpha 1, isoform CRA_d;Collagen, type XVIII, alpha 1, isoform CRA_b;Collagen alpha-1(XVIII) chain	37287.1	110905	0
D3DVC4;P48681	D3DVC4;P48681	NES	Nestin, isoform CRA_c;Nestin	79552.7	0	1.35583
D6RBJ7;D6RF35;P02774;V9HWI6	D6RBJ7;D6RF35;P02774;V9HWI6	GC;GC;GC;HEL-S-51	Vitamin D-binding protein	297291	323167	830499
D6RF86;P55285	D6RF86;P55285	CDH6	Cadherin-6	66602.4	119907	61963.5
E7DVW5;Q01469	E7DVW5;Q01469	FABP5	Fatty acid binding protein 5 (Psoriasis-associated);Fatty acid-binding protein 5	2.43095e+06	884276	640867
E7EVA0;P27816	E7EVA0;P27816	MAP4	Microtubule-associated protein;Microtubule-associated protein 4	69.7679	0	0
E9PD35;P35916;Q59F24	E9PD35;P35916;Q59F24	FLT4;FLT4;	Vascular endothelial growth factor receptor 3;Vascular endothelial growth factor receptor 3;Vascular endothelial growth factor receptor 3 variant (Fragment)	893529	1.32192e+06	629930
E9PGC8;P78559	E9PGC8;P78559	MAP1A	Microtubule-associated protein 1A	771654	0	0
E9PGZ1	E9PGZ1	CALD1	Caldesmon	0	67943.1	250838
E9PHY5;O43491	E9PHY5;O43491	EPB41L2	Band 4.1-like protein 2	0	0	92147
F6RFD5;P60981;V9HWA6	F6RFD5;P60981;V9HWA6	DSTN;DSTN;HEL32	Destrin	0	1.36254e+06	0
F6SYF8;Q9UBP4	F6SYF8;Q9UBP4	DKK3	Dickkopf-related protein 3	1.56595e+06	1.51167e+06	8572664
F8W1R7;G3V1V0;P60660	F8W1R7;G3V1V0;P60660	MYL6	Myosin light polypeptide 6	0	0	5.5829e+06
G3V1N2	G3V1N2	HBA2	Alpha-globin	28370430	36250564	12234108
G3V3X5;G3V511;Q14767;Q59EE6;Q6AZ94	G3V3X5;G3V511;Q14767;Q59EE6;Q6AZ94	LTBP2;LTBP2;LTBP2;;LTBP2	Latent-transforming growth factor beta-binding protein 2;Latent-transforming growth factor beta-binding protein 2;Latent-transforming growth factor beta-binding protein 2;Latent transforming growth factor beta binding protein 2 variant (Fragment);Latent transforming growth factor beta binding protein 2	580448	0	0
H6VRF8;H6VRG0;H6VRG1;H6VRG3;P04264	H6VRF8;H6VRG0;H6VRG1;H6VRG3;P04264	KRT1	Keratin, type II cytoskeletal 1;Keratin, type II cytoskeletal 1;Keratin, type II cytoskeletal 1;Keratin, type II cytoskeletal 1;Keratin, type II cytoskeletal 1	49101112	42558024	46775920
H7BYY1	H7BYY1	TPM1	Tropomyosin 1 (Alpha), isoform CRA_m	161673	192589	153427
H9ZYJ2;P10599	H9ZYJ2;P10599	TXN	Thioredoxin	105153	257844	173679
J3KRE2;J3KTF8;J3QQX2;P52565;V9HWE8	J3KRE2;J3KTF8;J3QQX2;P52565;V9HWE8	ARHGDIA;ARHGDIA;ARHGDIA;ARHGDIA;HEL-S-47e	Rho GDP-dissociation inhibitor 1;Rho GDP-dissociation inhibitor 1 (Fragment);Rho GDP-dissociation inhibitor 1;Rho GDP-dissociation inhibitor 1;Epididymis secretory sperm binding protein Li 47e	1.43539e+06	0	0
M0QYR6;M0R0H5;M0R1I2;M0R2E9;Q03405;Q9UPI5	M0QYR6;M0R0H5;M0R1I2;M0R2E9;Q03405;Q9UPI5	PLAUR	Urokinase plasminogen activator surface receptor (Fragment);Urokinase plasminogen activator surface receptor (Fragment);Urokinase plasminogen activator surface receptor;Urokinase plasminogen activator surface receptor (Fragment);Urokinase plasminogen activator surface receptor;Urokinase plasminogen activator surface receptor (Fragment)	0	0	2425.05
M1VE83;M1VKI3;P31431	M1VE83;M1VKI3;P31431	SDC4-ROS1_S4;R34;SDC4-ROS1_S4;R32;SDC4	Tyrosine-protein kinase receptor;Tyrosine-protein kinase receptor;Syndecan-4	2.01341e+06	2.55914e+06	1.16812e+06
O00461	O00461	GOLIM4	Golgi integral membrane protein 4	257994	0	0
O14828;Q6FHJ5	O14828;Q6FHJ5	SCAMP3	Secretory carrier-associated membrane protein 3;Secretory carrier-associated membrane protein (Fragment)	0	236974	1286230
O60271	O60271	SPAG9	C-Jun-amino-terminal kinase-interacting protein 4	0	7.01351e+06	0
O75506	O75506	HSBP1	Heat shock factor-binding protein 1	0	0	57107
P02452	P02452	COL1A1	Collagen alpha-1(I) chain	573463	691057	426374
P02461	P02461	COL3A1	Collagen alpha-1(III) chain	946108	522353	2.71903e+06
P02533	P02533	KRT14	Keratin, type I cytoskeletal 14	3195722	1.01649e+06	3565763
P02768	P02768	ALB	Albumin	1544088704	1584231936	1813301248
P02787;Q06AH7;Q53H26	P02787;Q06AH7;Q53H26	TF;TF;	Serotransferrin;Serotransferrin;Serotransferrin (Fragment)	626310	849584	418669
P02795	P02795	MT2A	Metallothionein-2	1.67801e+06	1.83537e+06	1.16003e+06
P04259	P04259	KRT6B	Keratin, type II cytoskeletal 6B	1.10462e+06	1.91571e+06	640391
P06727	P06727	APOA4	Apolipoprotein A-IV	5881404	5353707	4582975
P07108	P07108	DBI	Acyl-CoA-binding protein	102.741	0	0.711617
P07585;Q6FH10	P07585;Q6FH10	DCN	Decorin	3.44893e+06	3.67451e+06	5.66725e+06
P08670;V9HWE1	P08670;V9HWE1	VIM;HEL113	Vimentin	6.6947e+06	4575335	5.60089e+06
P08727	P08727	KRT19	Keratin, type I cytoskeletal 19	2.56754	0	0
P08779	P08779	KRT16	Keratin, type I cytoskeletal 16	18249910	24090734	19007718
P09496	P09496	CLTA	Clathrin light chain A	0	0	1.77387e+06
P13647	P13647	KRT5	Keratin, type II cytoskeletal 5	1.55828e+06	1110234	1.42645e+06
P16949	P16949	STMN1	Stathmin	220984	0	38021.6
P23470	P23470	PTPRG	Receptor-type tyrosine-protein phosphatase gamma	252501	134652	96031.5
P23528;V9HWI5	P23528;V9HWI5	CFL1;HEL-S-15	Cofilin-1	2522452	3.6873e+06	2.47716e+06
P26022	P26022	PTX3	Pentraxin-related protein PTX3	61215.2	104690	155329
P26038;V9HWC0	P26038;V9HWC0	MSN;HEL70	Moesin;Epididymis luminal protein 70	0	0	1.9217
P29966	P29966	MARCKS	Myristoylated alanine-rich C-kinase substrate	1.33375e+06	2.35391e+06	1.80231e+06
P30530	P30530	AXL	Tyrosine-protein kinase receptor UFO	1601648	2.04127e+06	647902
P31151	P31151	S100A7	Protein S100-A7	53063.3	0	20154.8
P35527	P35527	KRT9	Keratin, type I cytoskeletal 9	18624418	17962586	19986392
P35556	P35556	FBN2	Fibrillin-2	2444505	0	22.5612
P35908	P35908	KRT2	Keratin, type II cytoskeletal 2 epidermal	4.83496e+06	5.63039e+06	4.24307e+06
P62258;V9HW98	P62258;V9HW98	YWHAE;HEL2	14-3-3 protein epsilon;Epididymis luminal protein 2	380265	0	350447
P63313	P63313	TMSB10	Thymosin beta-10	3540221	4014339	1991666
P67936;V9HW56	P67936;V9HW56	TPM4;HEL-S-108	Tropomyosin alpha-4 chain;Epididymis secretory protein Li 108	4.58212e+06	3.86748e+06	5.32351e+06
P80303	P80303	NUCB2	Nucleobindin-2	727305	154109	200610
P80723	P80723	BASP1	Brain acid soluble protein 1	30096.9	233165	94813.8
P81605	P81605	DCD	Dermcidin	1.44136e+06	1.30804e+06	2.22645e+06
P84101	P84101	SERF2	Small EDRK-rich factor 2	0	81756.5	28466.8
Q02952	Q02952	AKAP12	A-kinase anchor protein 12	0	0	203.829
Q04695	Q04695	KRT17	Keratin, type I cytoskeletal 17	2709619	1.81058e+06	2.67614e+06
Q09666	Q09666	AHNAK	Neuroblast differentiation-associated protein AHNAK	125298120	6.24347e+06	10954.9
Q12841	Q12841	FSTL1	Follistatin-related protein 1	19080650	18310532	17878230
Q13740	Q13740	ALCAM	CD166 antigen	2.71943e+06	2.9471e+06	1.67075e+06
Q14011;Q53XX5	Q14011;Q53XX5	CIRBP	Cold-inducible RNA-binding protein	98618.5	0	0
Q14CN4;Q3SY84	Q14CN4;Q3SY84	KRT72;KRT71	Keratin, type II cytoskeletal 72;Keratin, type II cytoskeletal 71	65645.5	0	0
Q15149	Q15149	PLEC	Plectin	953752	0	2969971
Q15223;Q6SYC2	Q15223;Q6SYC2	NECTIN1;PVRL1	Nectin-1;Poliovirus receptor-related 1 (Fragment)	2.92425e+06	2.91642e+06	1.78469e+06
Q15293;V9HW95	Q15293;V9HW95	RCN1;HEL-S-84	Reticulocalbin-1;Epididymis secretory protein Li 84	494537	398460	557375
Q4LDX3	Q4LDX3	JAK1	Tyrosine-protein kinase	2.63989e+06	2.22888e+06	6926382
Q53H37;Q9NZT1	Q53H37;Q9NZT1	;CALML5	Calmodulin-like skin protein variant (Fragment);Calmodulin-like protein 5	971894	439420	608714
Q56G89	Q56G89		Serum albumin	40248520	34602384	99049008
Q5D862	Q5D862	FLG2	Filaggrin-2	98683.4	89074.2	142909
Q5HYL6;Q9NYL9	Q5HYL6;Q9NYL9	DKFZp686E1899;TMOD3	Uncharacterized protein DKFZp686E1899;Tropomodulin-3	0	0	121426
Q5KU26	Q5KU26	COLEC12	Collectin-12	798225	462301	1148704
Q6NZI2	Q6NZI2	CAVIN1	Caveolae-associated protein 1	947427	0	0
Q6YHK3	Q6YHK3	CD109	CD109 antigen	635074	317549	363714
Q71U42	Q71U42	BRL	Benzodiazepine receptor ligand	2136032	492098	3.53423e+06
Q7Z4V5	Q7Z4V5	HDGFL2	Hepatoma-derived growth factor-related protein 2	75989	66310	101728
Q86SQ4	Q86SQ4	ADGRG6	Adhesion G-protein coupled receptor G6	28030.1	0	3401.71
Q86U42	Q86U42	PABPN1	Polyadenylate-binding protein 2	0	185612	264008
Q8IVF2	Q8IVF2	AHNAK2	Protein AHNAK2	0	0	9127.04
Q8NHP8	Q8NHP8	PLBD2	Putative phospholipase B-like 2	322801	513139	538568
Q96C90	Q96C90	PPP1R14B	Protein phosphatase 1 regulatory subunit 14B	0	405517	0
Q96D15	Q96D15	RCN3	Reticulocalbin-3	2.84701e+06	2129820	2.42628e+06
Q99650	Q99650	OSMR	Oncostatin-M-specific receptor subunit beta	6.57126e+06	4.00405e+06	8789215
Q9GZX9	Q9GZX9	TWSG1	Twisted gastrulation protein homolog 1	127697	0	0
Q9H7C4	Q9H7C4	SYNC	Syncoilin	0.7913	0	0
Q9UK54	Q9UK54	HBB	Hemoglobin beta subunit variant (Fragment)	7535024	7356329	4756837
Q9UMX5	Q9UMX5	NENF	Neudesin	0	0	90985.4
Q9UNN8	Q9UNN8	PROCR	Endothelial protein C receptor	662226	1.01857e+06	669791

## Sheet: Peptides
PG.ProteinGroups	PG.ProteinAccessions	PG.Genes	PG.ProteinNames	PEP.StrippedSequence	PEP.PeptidePosition	EG.PrecursorId	EG.IntPIMID	SCT-1.PEP.Quantity	SCT-2.PEP.Quantity	SCT-3.PEP.Quantity
A0A024QYT5;P05121	A0A024QYT5;P05121	SERPINE1	A0A024QYT5_HUMAN;PAI1_HUMAN	EVPLSALTNILSAQLISHWK	267;267	_EVPLSALTNILSAQLISHWK_.3	_EVPLSALTNILSAQLISHWK_	148499	168647	132227
A0A024QYT5;P05121	A0A024QYT5;P05121	SERPINE1	A0A024QYT5_HUMAN;PAI1_HUMAN	VFQQVAQASK	42;42	_VFQQVAQASK_.2	_VFQQVAQASK_	248852	0	0
A0A024QZF1;M0QXN5;P37198	A0A024QZF1;M0QXN5;P37198	hCG_19665;NUP62;NUP62	A0A024QZF1_HUMAN;M0QXN5_HUMAN;NUP62_HUMAN	DIIEHLNTSGAPADTSDPLQQICK	453;377;453	_DIIEHLNTSGAPADTSDPLQQIC[Carbamidomethyl (C)]K_.3	_DIIEHLNTSGAPADTSDPLQQIC[+57]K_	0	0	36223.9
A0A024QZQ2;P07602;Q53FJ5;Q59EN5	A0A024QZQ2;P07602;Q53FJ5;Q59EN5	PSAP;PSAP;;	A0A024QZQ2_HUMAN;SAP_HUMAN;Q53FJ5_HUMAN;Q59EN5_HUMAN	SLPCDICK	60;60;60;63	_SLPC[Carbamidomethyl (C)]DIC[Carbamidomethyl (C)]K_.2	_SLPC[+57]DIC[+57]K_	568317	1.51212e+06	820373
A0A024QZQ2;P07602;Q53FJ5;Q59EN5	A0A024QZQ2;P07602;Q53FJ5;Q59EN5	PSAP;PSAP;;	A0A024QZQ2_HUMAN;SAP_HUMAN;Q53FJ5_HUMAN;Q59EN5_HUMAN	SLPCDICK	60;60;60;63	_SLPC[Carbamidomethyl (C)]DIC[Carbamidomethyl (C)]K_.1	_SLPC[+57]DIC[+57]K_	568317	1.51212e+06	820373
A0A024QZQ2;P07602;Q53FJ5;Q59EN5	A0A024QZQ2;P07602;Q53FJ5;Q59EN5	PSAP;PSAP;;	A0A024QZQ2_HUMAN;SAP_HUMAN;Q53FJ5_HUMAN;Q59EN5_HUMAN	HLAELNHQK	144;144;144;147	_HLAELNHQK_.3	_HLAELNHQK_	130069	0	0
A0A024QZQ2;P07602;Q53FJ5;Q59EN5	A0A024QZQ2;P07602;Q53FJ5;Q59EN5	PSAP;PSAP;;	A0A024QZQ2_HUMAN;SAP_HUMAN;Q53FJ5_HUMAN;Q59EN5_HUMAN	GSAVWCQNVK	28;28;28;31	_GSAVWC[Carbamidomethyl (C)]QNVK_.2	_GSAVWC[+57]QNVK_	355307	641214	0
A0A024QZQ2;P07602;Q53FJ5;Q59EN5	A0A024QZQ2;P07602;Q53FJ5;Q59EN5	PSAP;PSAP;;	A0A024QZQ2_HUMAN;SAP_HUMAN;Q53FJ5_HUMAN;Q59EN5_HUMAN	EILDAFDK	337;337;337;343	_EILDAFDK_.2	_EILDAFDK_	2.47353e+06	1751909	0
A0A024QZQ2;P07602;Q53FJ5;Q59EN5	A0A024QZQ2;P07602;Q53FJ5;Q59EN5	PSAP;PSAP;;	A0A024QZQ2_HUMAN;SAP_HUMAN;Q53FJ5_HUMAN;Q59EN5_HUMAN	EILDAFDK	337;337;337;343	_EILDAFDK_.1	_EILDAFDK_	2.47353e+06	1751909	0
A0A024QZQ2;P07602;Q53FJ5;Q59EN5	A0A024QZQ2;P07602;Q53FJ5;Q59EN5	PSAP;PSAP;;	A0A024QZQ2_HUMAN;SAP_HUMAN;Q53FJ5_HUMAN;Q59EN5_HUMAN	EICALVGFCDEVK	263;263;263;269	_EIC[Carbamidomethyl (C)]ALVGFC[Carbamidomethyl (C)]DEVK_.2	_EIC[+57]ALVGFC[+57]DEVK_	0	0	120153
A0A024QZQ2;P07602;Q53FJ5;Q59EN5	A0A024QZQ2;P07602;Q53FJ5;Q59EN5	PSAP;PSAP;;	A0A024QZQ2_HUMAN;SAP_HUMAN;Q53FJ5_HUMAN;Q59EN5_HUMAN	LVGYLDR	415;415;415;421	_LVGYLDR_.2	_LVGYLDR_	3.58398e+06	5.31446e+06	1.12158e+06
A0A024QZQ2;P07602;Q53FJ5;Q59EN5	A0A024QZQ2;P07602;Q53FJ5;Q59EN5	PSAP;PSAP;;	A0A024QZQ2_HUMAN;SAP_HUMAN;Q53FJ5_HUMAN;Q59EN5_HUMAN	LVGYLDR	415;415;415;421	_LVGYLDR_.1	_LVGYLDR_	3.58398e+06	5.31446e+06	1.12158e+06
A0A024QZQ2;P07602;Q53FJ5;Q59EN5	A0A024QZQ2;P07602;Q53FJ5;Q59EN5	PSAP;PSAP;;	A0A024QZQ2_HUMAN;SAP_HUMAN;Q53FJ5_HUMAN;Q59EN5_HUMAN	SDVYCEVCEFLVK	311;311;311;317	_SDVYC[Carbamidomethyl (C)]EVC[Carbamidomethyl (C)]EFLVK_.2	_SDVYC[+57]EVC[+57]EFLVK_	42786.2	45098.7	0
A0A024QZQ2;P07602;Q53FJ5;Q59EN5	A0A024QZQ2;P07602;Q53FJ5;Q59EN5	PSAP;PSAP;;	A0A024QZQ2_HUMAN;SAP_HUMAN;Q53FJ5_HUMAN;Q59EN5_HUMAN	SDVYCEVCEFLVK	311;311;311;317	_SDVYC[Carbamidomethyl (C)]EVC[Carbamidomethyl (C)]EFLVK_.3	_SDVYC[+57]EVC[+57]EFLVK_	42786.2	45098.7	0
A0A024QZQ2;P07602;Q53FJ5;Q59EN5	A0A024QZQ2;P07602;Q53FJ5;Q59EN5	PSAP;PSAP;;	A0A024QZQ2_HUMAN;SAP_HUMAN;Q53FJ5_HUMAN;Q59EN5_HUMAN	EIVDSYLPVILDIIK	108;108;108;111	_EIVDSYLPVILDIIK_.3	_EIVDSYLPVILDIIK_	0	0	2100.18
A0A024QZQ2;P07602;Q53FJ5;Q59EN5	A0A024QZQ2;P07602;Q53FJ5;Q59EN5	PSAP;PSAP;;	A0A024QZQ2_HUMAN;SAP_HUMAN;Q53FJ5_HUMAN;Q59EN5_HUMAN	EIVDSYLPVILDIIK	108;108;108;111	_EIVDSYLPVILDIIK_.2	_EIVDSYLPVILDIIK_	0	0	2100.18
A0A024QZQ2;P07602;Q53FJ5;Q59EN5	A0A024QZQ2;P07602;Q53FJ5;Q59EN5	PSAP;PSAP;;	A0A024QZQ2_HUMAN;SAP_HUMAN;Q53FJ5_HUMAN;Q59EN5_HUMAN	DVVTAAGDMLK	68;68;68;71	_DVVTAAGDM[Oxidation (M)]LK_.2	_DVVTAAGDM[+16]LK_	0	0	18122
A0A024QZQ2;P07602;Q53FJ5;Q59EN5	A0A024QZQ2;P07602;Q53FJ5;Q59EN5	PSAP;PSAP;;	A0A024QZQ2_HUMAN;SAP_HUMAN;Q53FJ5_HUMAN;Q59EN5_HUMAN	DVVTAAGDMLK	68;68;68;71	_DVVTAAGDMLK_.2	_DVVTAAGDMLK_	0	0	18122
A0A024R017;A0A024RAS2;A0A0U1RR32;A0A0U1RRH7;A3KPC7;A4FTV9;B2R5B3;P04908;P0C0S8;P20671;Q08AJ9;Q16777;Q6FI13;Q7L7L0;Q93077;Q96KK5;Q99878;Q9BTM1	A0A024R017;A0A024RAS2;A0A0U1RR32;A0A0U1RRH7;A3KPC7;A4FTV9;B2R5B3;P04908;P0C0S8;P20671;Q08AJ9;Q16777;Q6FI13;Q7L7L0;Q93077;Q96KK5;Q99878;Q9BTM1	HIST1H2AC;H2AFJ;hCG_2039566;;HIST1H2AH;HIST1H2AK;;H2AC8;H2AC17;H2AC7;HIST1H2AB;H2AC20;H2AC19;H2AC25;H2AC6;H2AC12;H2AC14;H2AJ	A0A024R017_HUMAN;A0A024RAS2_HUMAN;A0A0U1RR32_HUMAN;A0A0U1RRH7_HUMAN;A3KPC7_HUMAN;A4FTV9_HUMAN;B2R5B3_HUMAN;H2A1B_HUMAN;H2A1_HUMAN;H2A1D_HUMAN;Q08AJ9_HUMAN;H2A2C_HUMAN;H2A2A_HUMAN;H2A3_HUMAN;H2A1C_HUMAN;H2A1H_HUMAN;H2A1J_HUMAN;H2AJ_HUMAN	AGLQFPVGR	22;22;22;22;22;22;22;22;22;22;22;22;22;22;22;22;22;22	_AGLQFPVGR_.2	_AGLQFPVGR_	0	398398	0
A0A024R084;A0A5F9UP49;Q9BRK5	A0A024R084;A0A5F9UP49;Q9BRK5	SDF4	A0A024R084_HUMAN;A0A5F9UP49_HUMAN;CAB45_HUMAN	DLGGFDEDAEPR	86;79;86	_DLGGFDEDAEPR_.2	_DLGGFDEDAEPR_	541149	154407	747648
A0A024R0A1;B4DTX0;E9PJA2;P09603;Q59H07	A0A024R0A1;B4DTX0;E9PJA2;P09603;Q59H07	CSF1;;CSF1;CSF1;	A0A024R0A1_HUMAN;B4DTX0_HUMAN;E9PJA2_HUMAN;CSF1_HUMAN;Q59H07_HUMAN	NLLDKDWNIFSK	158;66;117;158;212	_NLLDKDWNIFSK_.3	_NLLDKDWNIFSK_	1	0	7932.87
A0A024R0A1;B4DTX0;E9PJA2;P09603;Q59H07	A0A024R0A1;B4DTX0;E9PJA2;P09603;Q59H07	CSF1;;CSF1;CSF1;	A0A024R0A1_HUMAN;B4DTX0_HUMAN;E9PJA2_HUMAN;CSF1_HUMAN;Q59H07_HUMAN	NLLDKDWNIFSK	158;66;117;158;212	_NLLDKDWNIFSK_.2	_NLLDKDWNIFSK_	1	0	7932.87
A0A024R0A1;B4DTX0;E9PJA2;P09603;Q59H07	A0A024R0A1;B4DTX0;E9PJA2;P09603;Q59H07	CSF1;;CSF1;CSF1;	A0A024R0A1_HUMAN;B4DTX0_HUMAN;E9PJA2_HUMAN;CSF1_HUMAN;Q59H07_HUMAN	TFYETPLQLLEK	137;45;96;137;191	_TFYETPLQLLEK_.2	_TFYETPLQLLEK_	0	16880.8	0
A0A024R1X8;A0A0S2Z487;P14923	A0A024R1X8;A0A0S2Z487;P14923	JUP	A0A024R1X8_HUMAN;A0A0S2Z487_HUMAN;PLAK_HUMAN	TLVTQNSGVEALIHAILR	427;427;427	_TLVTQNSGVEALIHAILR_.3	_TLVTQNSGVEALIHAILR_	57352.7	38281.6	25524.5
A0A024R1X8;A0A0S2Z487;P14923	A0A024R1X8;A0A0S2Z487;P14923	JUP	A0A024R1X8_HUMAN;A0A0S2Z487_HUMAN;PLAK_HUMAN	LVQLLVK	527;527;527	_LVQLLVK_.2	_LVQLLVK_	1.10776e+06	1.04766e+06	881626
A0A024R216;Q9Y3E1	A0A024R216;Q9Y3E1	HDGFRP3;HDGFL3	A0A024R216_HUMAN;HDGR3_HUMAN	GFNEGLWEIENNPGVK	80;80	_GFNEGLWEIENNPGVK_.2	_GFNEGLWEIENNPGVK_	1.49982e+06	0	0
A0A024R216;Q9Y3E1	A0A024R216;Q9Y3E1	HDGFRP3;HDGFL3	A0A024R216_HUMAN;HDGR3_HUMAN	GFNEGLWEIENNPGVK	80;80	_GFNEGLWEIENNPGVK_.3	_GFNEGLWEIENNPGVK_	1.49982e+06	0	0
A0A024R2K4;Q9Y608	A0A024R2K4;Q9Y608	LRRFIP2	A0A024R2K4_HUMAN;LRRF2_HUMAN	LAGEKEELLSQIR	573;573	_LAGEKEELLSQIR_.3	_LAGEKEELLSQIR_	0	0	10.4284
A0A024R3E3;F8W696;P02647	A0A024R3E3;F8W696;P02647	APOA1	A0A024R3E3_HUMAN;F8W696_HUMAN;APOA1_HUMAN	EQLGPVTQEFWDNLEK	86;64;86	_EQLGPVTQEFWDNLEK_.2	_EQLGPVTQEFWDNLEK_	65308564	75501912	69087368
A0A024R3E3;F8W696;P02647	A0A024R3E3;F8W696;P02647	APOA1	A0A024R3E3_HUMAN;F8W696_HUMAN;APOA1_HUMAN	EQLGPVTQEFWDNLEK	86;64;86	_EQLGPVTQEFWDNLEK_.3	_EQLGPVTQEFWDNLEK_	65308564	75501912	69087368
A0A024R462;A0A384MR03;B7ZLE5;P02751;Q6MZF4	A0A024R462;A0A384MR03;B7ZLE5;P02751;Q6MZF4	FN1;;FN1;FN1;DKFZp686K139	A0A024R462_HUMAN;A0A384MR03_HUMAN;B7ZLE5_HUMAN;FINC_HUMAN;Q6MZF4_HUMAN	TYLGNALVCTCYGGSR	68;68;68;68;157	_TYLGNALVC[Carbamidomethyl (C)]TC[Carbamidomethyl (C)]YGGSR_.2	_TYLGNALVC[+57]TC[+57]YGGSR_	4.80401	3.74223	90359.7
A0A024R4D5;A0A384NPH9;H7BZE9;H7C024;H7C410;P35052;Q59GI7	A0A024R4D5;A0A384NPH9;H7BZE9;H7C024;H7C410;P35052;Q59GI7	GPC1;;GPC1;GPC1;GPC1;GPC1;	A0A024R4D5_HUMAN;A0A384NPH9_HUMAN;H7BZE9_HUMAN;H7C024_HUMAN;H7C410_HUMAN;GPC1_HUMAN;Q59GI7_HUMAN	VLQAMLATQLR	23;95;23;23;23;95;61	_VLQAMLATQLR_.2	_VLQAMLATQLR_	4.29368e+06	4.065e+06	2351020
A0A024R4D5;A0A384NPH9;H7BZE9;H7C024;H7C410;P35052;Q59GI7	A0A024R4D5;A0A384NPH9;H7BZE9;H7C024;H7C410;P35052;Q59GI7	GPC1;;GPC1;GPC1;GPC1;GPC1;	A0A024R4D5_HUMAN;A0A384NPH9_HUMAN;H7BZE9_HUMAN;H7C024_HUMAN;H7C410_HUMAN;GPC1_HUMAN;Q59GI7_HUMAN	QAEALRPFGEAPR	123;195;123;123;123;195;161	_QAEALRPFGEAPR_.3	_QAEALRPFGEAPR_	2.11637e+06	3256779	303606
A0A024R525;P02794	A0A024R525;P02794	FTH1	A0A024R525_HUMAN;FRIH_HUMAN	IFLQDIK	81;81	_IFLQDIK_.2	_IFLQDIK_	11255873	13300929	11226206
A0A024R525;P02794	A0A024R525;P02794	FTH1	A0A024R525_HUMAN;FRIH_HUMAN	IFLQDIK	81;81	_IFLQDIK_.1	_IFLQDIK_	11255873	13300929	11226206
A0A024R6I6;G3V2W1;Q9UK55	A0A024R6I6;G3V2W1;Q9UK55	SERPINA10	A0A024R6I6_HUMAN;G3V2W1_HUMAN;ZPI_HUMAN	LILVDYILFK	230;270;230	_LILVDYILFK_.2	_LILVDYILFK_	938880	927838	672716
A0A024R6I6;G3V2W1;Q9UK55	A0A024R6I6;G3V2W1;Q9UK55	SERPINA10	A0A024R6I6_HUMAN;G3V2W1_HUMAN;ZPI_HUMAN	FASTFDK	275;315;275	_FASTFDK_.2	_FASTFDK_	1.08934e+06	302799	510955
A0A024R7D5;H0YMD1;J3KMZ9;P01130;Q9UH51	A0A024R7D5;H0YMD1;J3KMZ9;P01130;Q9UH51	LDLR	A0A024R7D5_HUMAN;H0YMD1_HUMAN;J3KMZ9_HUMAN;LDLR_HUMAN;Q9UH51_HUMAN	IYWSDLSQR	441;441;526;441;418	_IYWSDLSQR_.2	_IYWSDLSQR_	750611	0	737589
A0A024R7D5;H0YMD1;J3KMZ9;P01130;Q9UH51	A0A024R7D5;H0YMD1;J3KMZ9;P01130;Q9UH51	LDLR	A0A024R7D5_HUMAN;H0YMD1_HUMAN;J3KMZ9_HUMAN;LDLR_HUMAN;Q9UH51_HUMAN	AVGSIAYLFFTNR	394;394;479;394;371	_AVGSIAYLFFTNR_.2	_AVGSIAYLFFTNR_	67096.6	48450.1	119931
A0A024R7D5;H0YMD1;J3KMZ9;P01130;Q9UH51	A0A024R7D5;H0YMD1;J3KMZ9;P01130;Q9UH51	LDLR	A0A024R7D5_HUMAN;H0YMD1_HUMAN;J3KMZ9_HUMAN;LDLR_HUMAN;Q9UH51_HUMAN	AVGSIAYLFFTNR	394;394;479;394;371	_AVGSIAYLFFTNR_.3	_AVGSIAYLFFTNR_	67096.6	48450.1	119931
A0A024R7D5;H0YMD1;J3KMZ9;P01130;Q9UH51	A0A024R7D5;H0YMD1;J3KMZ9;P01130;Q9UH51	LDLR	A0A024R7D5_HUMAN;H0YMD1_HUMAN;J3KMZ9_HUMAN;LDLR_HUMAN;Q9UH51_HUMAN	NEFQCQDGK	30;30;115;30;7	_NEFQC[Carbamidomethyl (C)]QDGK_.2	_NEFQC[+57]QDGK_	0	828438	0
A0A024R7D5;H0YMD1;J3KMZ9;P01130;Q9UH51	A0A024R7D5;H0YMD1;J3KMZ9;P01130;Q9UH51	LDLR	A0A024R7D5_HUMAN;H0YMD1_HUMAN;J3KMZ9_HUMAN;LDLR_HUMAN;Q9UH51_HUMAN	VFWTDIINEAIFSANR	618;618;703;618;595	_VFWTDIINEAIFSANR_.3	_VFWTDIINEAIFSANR_	26766	0	12880.1
A0A024R7D5;H0YMD1;J3KMZ9;P01130;Q9UH51	A0A024R7D5;H0YMD1;J3KMZ9;P01130;Q9UH51	LDLR	A0A024R7D5_HUMAN;H0YMD1_HUMAN;J3KMZ9_HUMAN;LDLR_HUMAN;Q9UH51_HUMAN	VFWTDIINEAIFSANR	618;618;703;618;595	_VFWTDIINEAIFSANR_.2	_VFWTDIINEAIFSANR_	26766	0	12880.1
A0A024R8S5;A0A7P0TA35;A0A7P0TA71;A0A7P0TB26;P07237	A0A024R8S5;A0A7P0TA35;A0A7P0TA71;A0A7P0TB26;P07237	P4HB	A0A024R8S5_HUMAN;A0A7P0TA35_HUMAN;A0A7P0TA71_HUMAN;A0A7P0TB26_HUMAN;PDIA1_HUMAN	ILEFFGLK	301;335;301;326;301	_ILEFFGLK_.2	_ILEFFGLK_	0	0	7203.9
A0A024R8S5;A0A7P0TA35;A0A7P0TA71;A0A7P0TB26;P07237	A0A024R8S5;A0A7P0TA35;A0A7P0TA71;A0A7P0TB26;P07237	P4HB	A0A024R8S5_HUMAN;A0A7P0TA35_HUMAN;A0A7P0TA71_HUMAN;A0A7P0TB26_HUMAN;PDIA1_HUMAN	ILEFFGLK	301;335;301;326;301	_ILEFFGLK_.1	_ILEFFGLK_	0	0	7203.9
A0A024R944;A0A0K0Q2Z1;A0A2S0BDD1;A0A3S8NFS6;P01008	A0A024R944;A0A0K0Q2Z1;A0A2S0BDD1;A0A3S8NFS6;P01008	SERPINC1;SERPINC1;ATIII-R2;;SERPINC1	A0A024R944_HUMAN;A0A0K0Q2Z1_HUMAN;A0A2S0BDD1_HUMAN;A0A3S8NFS6_HUMAN;ANT3_HUMAN	TSDQIHFFFAK	147;147;147;147;147	_TSDQIHFFFAK_.3	_TSDQIHFFFAK_	17432914	18615444	14723236
A0A024R944;A0A0K0Q2Z1;A0A2S0BDD1;A0A3S8NFS6;P01008	A0A024R944;A0A0K0Q2Z1;A0A2S0BDD1;A0A3S8NFS6;P01008	SERPINC1;SERPINC1;ATIII-R2;;SERPINC1	A0A024R944_HUMAN;A0A0K0Q2Z1_HUMAN;A0A2S0BDD1_HUMAN;A0A3S8NFS6_HUMAN;ANT3_HUMAN	TSDQIHFFFAK	147;147;147;147;147	_TSDQIHFFFAK_.2	_TSDQIHFFFAK_	17432914	18615444	14723236
A0A024R944;A0A0K0Q2Z1;A0A2S0BDD1;A0A3S8NFS6;P01008	A0A024R944;A0A0K0Q2Z1;A0A2S0BDD1;A0A3S8NFS6;P01008	SERPINC1;SERPINC1;ATIII-R2;;SERPINC1	A0A024R944_HUMAN;A0A0K0Q2Z1_HUMAN;A0A2S0BDD1_HUMAN;A0A3S8NFS6_HUMAN;ANT3_HUMAN	LQPLDFK	202;202;202;202;202	_LQPLDFK_.2	_LQPLDFK_	19861176	23072838	24716958
A0A024R944;A0A0K0Q2Z1;A0A2S0BDD1;A0A3S8NFS6;P01008	A0A024R944;A0A0K0Q2Z1;A0A2S0BDD1;A0A3S8NFS6;P01008	SERPINC1;SERPINC1;ATIII-R2;;SERPINC1	A0A024R944_HUMAN;A0A0K0Q2Z1_HUMAN;A0A2S0BDD1_HUMAN;A0A3S8NFS6_HUMAN;ANT3_HUMAN	LQPLDFK	202;202;202;202;202	_LQPLDFK_.1	_LQPLDFK_	19861176	23072838	24716958
A0A024R944;A0A0K0Q2Z1;A0A2S0BDD1;A0A3S8NFS6;P01008	A0A024R944;A0A0K0Q2Z1;A0A2S0BDD1;A0A3S8NFS6;P01008	SERPINC1;SERPINC1;ATIII-R2;;SERPINC1	A0A024R944_HUMAN;A0A0K0Q2Z1_HUMAN;A0A2S0BDD1_HUMAN;A0A3S8NFS6_HUMAN;ANT3_HUMAN	FDTISEK	140;140;140;140;140	_FDTISEK_.2	_FDTISEK_	1304698	867590	4.07486e+06
A0A024R944;A0A0K0Q2Z1;A0A2S0BDD1;A0A3S8NFS6;P01008	A0A024R944;A0A0K0Q2Z1;A0A2S0BDD1;A0A3S8NFS6;P01008	SERPINC1;SERPINC1;ATIII-R2;;SERPINC1	A0A024R944_HUMAN;A0A0K0Q2Z1_HUMAN;A0A2S0BDD1_HUMAN;A0A3S8NFS6_HUMAN;ANT3_HUMAN	FDTISEK	140;140;140;140;140	_FDTISEK_.1	_FDTISEK_	1304698	867590	4.07486e+06
A0A024R944;A0A0K0Q2Z1;A0A2S0BDD1;A0A3S8NFS6;P01008	A0A024R944;A0A0K0Q2Z1;A0A2S0BDD1;A0A3S8NFS6;P01008	SERPINC1;SERPINC1;ATIII-R2;;SERPINC1	A0A024R944_HUMAN;A0A0K0Q2Z1_HUMAN;A0A2S0BDD1_HUMAN;A0A3S8NFS6_HUMAN;ANT3_HUMAN	FSPENTR	261;261;302;261;261	_FSPENTR_.2	_FSPENTR_	1.08474e+06	1690979	2.26545e+06
A0A024R944;A0A0K0Q2Z1;A0A2S0BDD1;A0A3S8NFS6;P01008	A0A024R944;A0A0K0Q2Z1;A0A2S0BDD1;A0A3S8NFS6;P01008	SERPINC1;SERPINC1;ATIII-R2;;SERPINC1	A0A024R944_HUMAN;A0A0K0Q2Z1_HUMAN;A0A2S0BDD1_HUMAN;A0A3S8NFS6_HUMAN;ANT3_HUMAN	FSPENTRK	261;261;302;261;261	_FSPENTRK_.2	_FSPENTRK_	465154	644303	203030
A0A024R944;A0A0K0Q2Z1;A0A2S0BDD1;A0A3S8NFS6;P01008	A0A024R944;A0A0K0Q2Z1;A0A2S0BDD1;A0A3S8NFS6;P01008	SERPINC1;SERPINC1;ATIII-R2;;SERPINC1	A0A024R944_HUMAN;A0A0K0Q2Z1_HUMAN;A0A2S0BDD1_HUMAN;A0A3S8NFS6_HUMAN;ANT3_HUMAN	RVWELSK	79;79;79;79;79	_RVWELSK_.2	_RVWELSK_	21471672	16671277	7193818
A0A024R944;A0A0K0Q2Z1;A0A2S0BDD1;A0A3S8NFS6;P01008	A0A024R944;A0A0K0Q2Z1;A0A2S0BDD1;A0A3S8NFS6;P01008	SERPINC1;SERPINC1;ATIII-R2;;SERPINC1	A0A024R944_HUMAN;A0A0K0Q2Z1_HUMAN;A0A2S0BDD1_HUMAN;A0A3S8NFS6_HUMAN;ANT3_HUMAN	LPGIVAEGR	383;383;424;383;383	_LPGIVAEGR_.2	_LPGIVAEGR_	3.69316e+06	5.20032e+06	2.84357e+06
A0A024R944;A0A0K0Q2Z1;A0A2S0BDD1;A0A3S8NFS6;P01008	A0A024R944;A0A0K0Q2Z1;A0A2S0BDD1;A0A3S8NFS6;P01008	SERPINC1;SERPINC1;ATIII-R2;;SERPINC1	A0A024R944_HUMAN;A0A0K0Q2Z1_HUMAN;A0A2S0BDD1_HUMAN;A0A3S8NFS6_HUMAN;ANT3_HUMAN	LPGIVAEGR	383;383;424;383;383	_LPGIVAEGR_.1	_LPGIVAEGR_	3.69316e+06	5.20032e+06	2.84357e+06
A0A024R971;A0A3B3IRN5;Q06828	A0A024R971;A0A3B3IRN5;Q06828	FMOD	A0A024R971_HUMAN;A0A3B3IRN5_HUMAN;FMOD_HUMAN	YLPFVPSR	99;10;99	_YLPFVPSR_.2	_YLPFVPSR_	29572850	29219420	24116826
A0A024R971;A0A3B3IRN5;Q06828	A0A024R971;A0A3B3IRN5;Q06828	FMOD	A0A024R971_HUMAN;A0A3B3IRN5_HUMAN;FMOD_HUMAN	ELHLDHNQISR	180;91;180	_ELHLDHNQISR_.3	_ELHLDHNQISR_	2.00691e+06	1.14363e+06	7.11983e+06
A0A024R971;A0A3B3IRN5;Q06828	A0A024R971;A0A3B3IRN5;Q06828	FMOD	A0A024R971_HUMAN;A0A3B3IRN5_HUMAN;FMOD_HUMAN	SLILLDLSYNHLR	224;135;224	_SLILLDLSYNHLR_.3	_SLILLDLSYNHLR_	1.80117e+06	2.89255e+06	1861961
A0A024R971;A0A3B3IRN5;Q06828	A0A024R971;A0A3B3IRN5;Q06828	FMOD	A0A024R971_HUMAN;A0A3B3IRN5_HUMAN;FMOD_HUMAN	SLILLDLSYNHLR	224;135;224	_SLILLDLSYNHLR_.2	_SLILLDLSYNHLR_	1.80117e+06	2.89255e+06	1861961
A0A024R971;A0A3B3IRN5;Q06828	A0A024R971;A0A3B3IRN5;Q06828	FMOD	A0A024R971_HUMAN;A0A3B3IRN5_HUMAN;FMOD_HUMAN	LDGNEIKR	350;261;350	_LDGNEIKR_.2	_LDGNEIKR_	2.92199e+06	1760657	1.85203e+06
A0A024R971;A0A3B3IRN5;Q06828	A0A024R971;A0A3B3IRN5;Q06828	FMOD	A0A024R971_HUMAN;A0A3B3IRN5_HUMAN;FMOD_HUMAN	LASLIEI	370;281;370	_LASLIEI_.1	_LASLIEI_	1.47771e+06	1.11638e+06	1.9257e+06
A0A024R9Q1;A0PJG0;P07996	A0A024R9Q1;A0PJG0;P07996	THBS1	A0A024R9Q1_HUMAN;A0PJG0_HUMAN;TSP1_HUMAN	TIVTTLQDSIR	289;289;289	_TIVTTLQDSIR_.2	_TIVTTLQDSIR_	128877	0	195160
A0A024RAL1;A0A024RAQ9;P13611;Q59FG9	A0A024RAL1;A0A024RAQ9;P13611;Q59FG9	CSPG2;CSPG2;VCAN;	A0A024RAL1_HUMAN;A0A024RAQ9_HUMAN;CSPG2_HUMAN;Q59FG9_HUMAN	LGEPNYGAEIR	925;1912;1912;1926	_LGEPNYGAEIR_.2	_LGEPNYGAEIR_	202454	177355	138570
A0A024RAL1;A0A024RAQ9;P13611;Q59FG9	A0A024RAL1;A0A024RAQ9;P13611;Q59FG9	CSPG2;CSPG2;VCAN;	A0A024RAL1_HUMAN;A0A024RAQ9_HUMAN;CSPG2_HUMAN;Q59FG9_HUMAN	LATVGELQAAWR	277;277;277;291	_LATVGELQAAWR_.2	_LATVGELQAAWR_	2.89322e+06	1.76706e+06	1.37175e+06
A0A024RAL1;A0A024RAQ9;P13611;Q59FG9	A0A024RAL1;A0A024RAQ9;P13611;Q59FG9	CSPG2;CSPG2;VCAN;	A0A024RAL1_HUMAN;A0A024RAQ9_HUMAN;CSPG2_HUMAN;Q59FG9_HUMAN	EIVISER	918;1905;1905;1919	_EIVISER_.2	_EIVISER_	0	89933.7	96334.8
A0A024RAL1;A0A024RAQ9;P13611;Q59FG9	A0A024RAL1;A0A024RAQ9;P13611;Q59FG9	CSPG2;CSPG2;VCAN;	A0A024RAL1_HUMAN;A0A024RAQ9_HUMAN;CSPG2_HUMAN;Q59FG9_HUMAN	YEINSLIR	2328;3315;3315;3329	_YEINSLIR_.2	_YEINSLIR_	0	0	392366
A0A024RAM4;A2BDK6;P46821	A0A024RAM4;A2BDK6;P46821	MAP1B	A0A024RAM4_HUMAN;A2BDK6_HUMAN;MAP1B_HUMAN	STDFAPIKEDFGQEK	1462;1336;1462	_STDFAPIKEDFGQEK_.2	_STDFAPIKEDFGQEK_	0	0	1094937
A0A024RAM4;A2BDK6;P46821	A0A024RAM4;A2BDK6;P46821	MAP1B	A0A024RAM4_HUMAN;A2BDK6_HUMAN;MAP1B_HUMAN	STDFAPIKEDFGQEK	1462;1336;1462	_STDFAPIKEDFGQEK_.3	_STDFAPIKEDFGQEK_	0	0	1094937
A0A024RAN2	A0A024RAN2	CAST	A0A024RAN2_HUMAN	SLTPAVPVESKPDKPSGK	170	_SLTPAVPVESKPDKPSGK_.3	_SLTPAVPVESKPDKPSGK_	0	0	1
A0A024RAQ1;A0A024RAV4;P16989	A0A024RAQ1;A0A024RAV4;P16989	CSDA;CSDA;YBX3	A0A024RAQ1_HUMAN;A0A024RAV4_HUMAN;YBOX3_HUMAN	PAPAVGEAEDKENQQATSGPNQPSVR	301;232;301	_PAPAVGEAEDKENQQATSGPNQPSVR_.3	_PAPAVGEAEDKENQQATSGPNQPSVR_	3.24747	0	0
A0A024RAY2;B2RA03;P05783	A0A024RAY2;B2RA03;P05783	KRT18;;KRT18	A0A024RAY2_HUMAN;B2RA03_HUMAN;K1C18_HUMAN	TVQSLEIDLDSMR	302;302;302	_TVQSLEIDLDSMR_.2	_TVQSLEIDLDSMR_	0	230066	0
A0A024RAY2;B2RA03;P05783	A0A024RAY2;B2RA03;P05783	KRT18;;KRT18	A0A024RAY2_HUMAN;B2RA03_HUMAN;K1C18_HUMAN	LLEDGEDFNLGDALDSSNSMQTIQK	383;383;383	_LLEDGEDFNLGDALDSSNSM[Oxidation (M)]QTIQK_.3	_LLEDGEDFNLGDALDSSNSM[+16]QTIQK_	0	0	127675
A0A024RBB7;B7Z2V4;F5H4R6;F8VUX1;F8VXI6;F8VY35;F8W020;F8W0J6;H0YIV4;P55209	A0A024RBB7;B7Z2V4;F5H4R6;F8VUX1;F8VXI6;F8VY35;F8W020;F8W0J6;H0YIV4;P55209	NAP1L1;;NAP1L1;NAP1L1;NAP1L1;NAP1L1;NAP1L1;NAP1L1;NAP1L1;NAP1L1	A0A024RBB7_HUMAN;B7Z2V4_HUMAN;F5H4R6_HUMAN;F8VUX1_HUMAN;F8VXI6_HUMAN;F8VY35_HUMAN;F8W020_HUMAN;F8W0J6_HUMAN;H0YIV4_HUMAN;NP1L1_HUMAN	NVDLLSDMVQEHDEPILK	177;177;177;150;183;177;184;188;171;177	_NVDLLSDMVQEHDEPILK_.3	_NVDLLSDMVQEHDEPILK_	0	0	36697.1
A0A024RBB9;B4E2K7;Q9Y2U8	A0A024RBB9;B4E2K7;Q9Y2U8	LEMD3;;LEMD3	A0A024RBB9_HUMAN;B4E2K7_HUMAN;MAN1_HUMAN	AAAAASAPQQLSDEELFSQLR	2;2;2	_[Acetyl (Protein N-term)]AAAAASAPQQLSDEELFSQLR_.3	_[+42]AAAAASAPQQLSDEELFSQLR_	0	0	32182.3
A0A024RC42;A0A6Q8PF58;C9J126;C9JMH2;P19022	A0A024RC42;A0A6Q8PF58;C9J126;C9JMH2;P19022	CDH2	A0A024RC42_HUMAN;A0A6Q8PF58_HUMAN;C9J126_HUMAN;C9JMH2_HUMAN;CADH2_HUMAN	LSDPANWLK	537;452;452;452;537	_LSDPANWLK_.2	_LSDPANWLK_	1951214	1.28032e+06	1.1136e+06
A0A024RC42;A0A6Q8PF58;C9J126;C9JMH2;P19022	A0A024RC42;A0A6Q8PF58;C9J126;C9JMH2;P19022	CDH2	A0A024RC42_HUMAN;A0A6Q8PF58_HUMAN;C9J126_HUMAN;C9JMH2_HUMAN;CADH2_HUMAN	FLEAGIYEVPIIITDSGNPPK	670;585;585;585;670	_FLEAGIYEVPIIITDSGNPPK_.3	_FLEAGIYEVPIIITDSGNPPK_	5983.57	0	0
A0A024RCJ2;P06899;P23527;P33778;Q16778;Q8N257	A0A024RCJ2;P06899;P23527;P33778;Q16778;Q8N257	HIST1H2BJ;H2BC11;H2BC17;H2BC3;H2BC21;H2BC26	A0A024RCJ2_HUMAN;H2B1J_HUMAN;H2B1O_HUMAN;H2B1B_HUMAN;H2B2E_HUMAN;H2B3B_HUMAN	LLLPGELAK	101;101;101;101;101;101	_LLLPGELAK_.2	_LLLPGELAK_	242154	0	0
A0A024RCJ2;P06899;P23527;P33778;Q16778;Q8N257	A0A024RCJ2;P06899;P23527;P33778;Q16778;Q8N257	HIST1H2BJ;H2BC11;H2BC17;H2BC3;H2BC21;H2BC26	A0A024RCJ2_HUMAN;H2B1J_HUMAN;H2B1O_HUMAN;H2B1B_HUMAN;H2B2E_HUMAN;H2B3B_HUMAN	LLLPGELAK	101;101;101;101;101;101	_LLLPGELAK_.1	_LLLPGELAK_	242154	0	0
A0A024RD80;P08238;Q6PK50	A0A024RD80;P08238;Q6PK50	HSP90AB1	A0A024RD80_HUMAN;HS90B_HUMAN;Q6PK50_HUMAN	ELISNASDALDK	42;42;42	_ELISNASDALDK_.2	_ELISNASDALDK_	0	0	53693.4
A0A024RDE2;A0A024RDE6;A0A024RDJ0;A6XMV6;B7Z351;C4B6Q2;F2YQ21;P10451;Q3LGB0	A0A024RDE2;A0A024RDE6;A0A024RDJ0;A6XMV6;B7Z351;C4B6Q2;F2YQ21;P10451;Q3LGB0	SPP1;SPP1;SPP1;;SPP1;opn;;SPP1;SPP1	A0A024RDE2_HUMAN;A0A024RDE6_HUMAN;A0A024RDJ0_HUMAN;A6XMV6_HUMAN;B7Z351_HUMAN;C4B6Q2_HUMAN;F2YQ21_HUMAN;OSTP_HUMAN;Q3LGB0_HUMAN	ISHELDSASSEVN	302;288;275;302;315;261;280;302;261	_ISHELDSASSEVN_.2	_ISHELDSASSEVN_	4.87233e+06	1.85284e+06	4426565
A0A024RDQ0;A0A024RDS1;A0A0A0MSM0;B4DF68;B4DY72;Q92598	A0A024RDQ0;A0A024RDS1;A0A0A0MSM0;B4DF68;B4DY72;Q92598	HSPH1;HSPH1;HSPH1;;;HSPH1	A0A024RDQ0_HUMAN;A0A024RDS1_HUMAN;A0A0A0MSM0_HUMAN;B4DF68_HUMAN;B4DY72_HUMAN;HS105_HUMAN	FQEAEERPK	662;706;630;603;525;706	_FQEAEERPK_.2	_FQEAEERPK_	323354	0	0
A0A024RDQ0;A0A024RDS1;A0A0A0MSM0;B4DF68;B4DY72;Q92598	A0A024RDQ0;A0A024RDS1;A0A0A0MSM0;B4DF68;B4DY72;Q92598	HSPH1;HSPH1;HSPH1;;;HSPH1	A0A024RDQ0_HUMAN;A0A024RDS1_HUMAN;A0A0A0MSM0_HUMAN;B4DF68_HUMAN;B4DY72_HUMAN;HS105_HUMAN	FQEAEERPK	662;706;630;603;525;706	_FQEAEERPK_.3	_FQEAEERPK_	323354	0	0
A0A024RDY3;B3KRY3;P11279	A0A024RDY3;B3KRY3;P11279	LAMP1;;LAMP1	A0A024RDY3_HUMAN;B3KRY3_HUMAN;LAMP1_HUMAN	TVESITDIR	138;116;138	_TVESITDIR_.2	_TVESITDIR_	83334	0	0
A0A087WT59	A0A087WT59	TTR	A0A087WT59_HUMAN	VKVLDAVR	2	_VKVLDAVR_.2	_VKVLDAVR_	327298	0	0
A0A087WTE4;A0A087WTF6;A0A087WV75;A0A087WWD4;A0A087WX77;H7BYX6;P13591	A0A087WTE4;A0A087WTF6;A0A087WV75;A0A087WWD4;A0A087WX77;H7BYX6;P13591	NCAM1	A0A087WTE4_HUMAN;A0A087WTF6_HUMAN;A0A087WV75_HUMAN;A0A087WWD4_HUMAN;A0A087WX77_HUMAN;H7BYX6_HUMAN;NCAM1_HUMAN	FFLCQVAGDAK	38;38;38;38;38;38;38	_FFLC[Carbamidomethyl (C)]QVAGDAK_.2	_FFLC[+57]QVAGDAK_	0	846874	722156
A0A087WTE4;A0A087WTF6;A0A087WV75;A0A087WWD4;A0A087WX77;H7BYX6;P13591	A0A087WTE4;A0A087WTF6;A0A087WV75;A0A087WWD4;A0A087WX77;H7BYX6;P13591	NCAM1	A0A087WTE4_HUMAN;A0A087WTF6_HUMAN;A0A087WV75_HUMAN;A0A087WWD4_HUMAN;A0A087WX77_HUMAN;H7BYX6_HUMAN;NCAM1_HUMAN	VSSLTLK	367;367;403;403;377;367;377	_VSSLTLK_.2	_VSSLTLK_	232918	1.08027e+06	357574
A0A087WTE4;A0A087WTF6;A0A087WV75;A0A087WWD4;A0A087WX77;H7BYX6;P13591	A0A087WTE4;A0A087WTF6;A0A087WV75;A0A087WWD4;A0A087WX77;H7BYX6;P13591	NCAM1	A0A087WTE4_HUMAN;A0A087WTF6_HUMAN;A0A087WV75_HUMAN;A0A087WWD4_HUMAN;A0A087WX77_HUMAN;H7BYX6_HUMAN;NCAM1_HUMAN	LTPNQQR	62;62;62;62;62;62;62	_LTPNQQR_.2	_LTPNQQR_	0	60680.4	30715.4
A0A087WTE4;A0A087WTF6;A0A087WV75;A0A087WWD4;A0A087WX77;H7BYX6;P13591	A0A087WTE4;A0A087WTF6;A0A087WV75;A0A087WWD4;A0A087WX77;H7BYX6;P13591	NCAM1	A0A087WTE4_HUMAN;A0A087WTF6_HUMAN;A0A087WV75_HUMAN;A0A087WWD4_HUMAN;A0A087WX77_HUMAN;H7BYX6_HUMAN;NCAM1_HUMAN	GLGEISAASEFK	583;583;619;619;593;583;593	_GLGEISAASEFK_.2	_GLGEISAASEFK_	0	0	479182
A0A087WUV8;A0A7P0T8A7;A0A7P0TA85;A0A7P0TB04;B4DNE1;B4DY23;I3L192;P35613;Q54A51;R4GMX5	A0A087WUV8;A0A7P0T8A7;A0A7P0TA85;A0A7P0TB04;B4DNE1;B4DY23;I3L192;P35613;Q54A51;R4GMX5	BSG;BSG;BSG;BSG;;;BSG;BSG;hEMMPRIN;BSG	A0A087WUV8_HUMAN;A0A7P0T8A7_HUMAN;A0A7P0TA85_HUMAN;A0A7P0TB04_HUMAN;B4DNE1_HUMAN;B4DY23_HUMAN;I3L192_HUMAN;BASI_HUMAN;Q54A51_HUMAN;R4GMX5_HUMAN	FFVSSSQGR	78;65;155;158;274;151;150;274;158;65	_FFVSSSQGR_.2	_FFVSSSQGR_	92516.2	198019	0
A0A087WW43;B4DPQ4;E7ET33;Q06033	A0A087WW43;B4DPQ4;E7ET33;Q06033	ITIH3;;ITIH3;ITIH3	A0A087WW43_HUMAN;B4DPQ4_HUMAN;E7ET33_HUMAN;ITIH3_HUMAN	VTFELTYEELLKR	150;150;150;150	_VTFELTYEELLKR_.3	_VTFELTYEELLKR_	231824	307782	164913
A0A087WW43;B4DPQ4;E7ET33;Q06033	A0A087WW43;B4DPQ4;E7ET33;Q06033	ITIH3;;ITIH3;ITIH3	A0A087WW43_HUMAN;B4DPQ4_HUMAN;E7ET33_HUMAN;ITIH3_HUMAN	EVSFDVELPK	76;76;76;76	_EVSFDVELPK_.2	_EVSFDVELPK_	646642	340429	1394412
A0A087X054;A0A384P5T6;A0A494C039;B3KXH0;B7Z2N4;B7Z766;K7EQK2;Q9Y4L1	A0A087X054;A0A384P5T6;A0A494C039;B3KXH0;B7Z2N4;B7Z766;K7EQK2;Q9Y4L1	HYOU1;;HYOU1;;;;HYOU1;HYOU1	A0A087X054_HUMAN;A0A384P5T6_HUMAN;A0A494C039_HUMAN;B3KXH0_HUMAN;B7Z2N4_HUMAN;B7Z766_HUMAN;K7EQK2_HUMAN;HYOU1_HUMAN	LPATEKPVLLSK	816;878;878;869;860;727;878;878	_LPATEKPVLLSK_.3	_LPATEKPVLLSK_	153978	233626	177384
A0A087X054;A0A384P5T6;A0A494C039;B3KXH0;B7Z2N4;B7Z766;K7EQK2;Q9Y4L1	A0A087X054;A0A384P5T6;A0A494C039;B3KXH0;B7Z2N4;B7Z766;K7EQK2;Q9Y4L1	HYOU1;;HYOU1;;;;HYOU1;HYOU1	A0A087X054_HUMAN;A0A384P5T6_HUMAN;A0A494C039_HUMAN;B3KXH0_HUMAN;B7Z2N4_HUMAN;B7Z766_HUMAN;K7EQK2_HUMAN;HYOU1_HUMAN	LPATEKPVLLSK	816;878;878;869;860;727;878;878	_LPATEKPVLLSK_.2	_LPATEKPVLLSK_	153978	233626	177384
A0A087X054;A0A384P5T6;A0A494C039;B3KXH0;B7Z2N4;B7Z766;K7EQK2;Q9Y4L1	A0A087X054;A0A384P5T6;A0A494C039;B3KXH0;B7Z2N4;B7Z766;K7EQK2;Q9Y4L1	HYOU1;;HYOU1;;;;HYOU1;HYOU1	A0A087X054_HUMAN;A0A384P5T6_HUMAN;A0A494C039_HUMAN;B3KXH0_HUMAN;B7Z2N4_HUMAN;B7Z766_HUMAN;K7EQK2_HUMAN;HYOU1_HUMAN	AANSLEAFIFETQDK	677;739;739;730;721;588;739;739	_AANSLEAFIFETQDK_.3	_AANSLEAFIFETQDK_	13153.6	0	1
A0A087X054;A0A384P5T6;A0A494C039;B3KXH0;B7Z2N4;B7Z766;K7EQK2;Q9Y4L1	A0A087X054;A0A384P5T6;A0A494C039;B3KXH0;B7Z2N4;B7Z766;K7EQK2;Q9Y4L1	HYOU1;;HYOU1;;;;HYOU1;HYOU1	A0A087X054_HUMAN;A0A384P5T6_HUMAN;A0A494C039_HUMAN;B3KXH0_HUMAN;B7Z2N4_HUMAN;B7Z766_HUMAN;K7EQK2_HUMAN;HYOU1_HUMAN	AANSLEAFIFETQDK	677;739;739;730;721;588;739;739	_AANSLEAFIFETQDK_.2	_AANSLEAFIFETQDK_	13153.6	0	1
A0A087X0T8;A0A087X1W8;A0A0A0MTJ8;A0A4Z1;Q9BY67;X5D7A8;X5D8W0;X5DNF2;X5DQR8;X5DQS5	A0A087X0T8;A0A087X1W8;A0A0A0MTJ8;A0A4Z1;Q9BY67;X5D7A8;X5D8W0;X5DNF2;X5DQR8;X5DQS5	CADM1	A0A087X0T8_HUMAN;A0A087X1W8_HUMAN;A0A0A0MTJ8_HUMAN;A0A4Z1_HUMAN;CADM1_HUMAN;X5D7A8_HUMAN;X5D8W0_HUMAN;X5DNF2_HUMAN;X5DQR8_HUMAN;X5DQS5_HUMAN	SDDSVIQLLNPNR	28;28;68;69;69;69;69;69;69;69	_SDDSVIQLLNPNR_.2	_SDDSVIQLLNPNR_	829753	318006	1.16253e+06
A0A087X0T8;A0A087X1W8;A0A0A0MTJ8;A0A4Z1;Q9BY67;X5D7A8;X5D8W0;X5DNF2;X5DQR8;X5DQS5	A0A087X0T8;A0A087X1W8;A0A0A0MTJ8;A0A4Z1;Q9BY67;X5D7A8;X5D8W0;X5DNF2;X5DQR8;X5DQS5	CADM1	A0A087X0T8_HUMAN;A0A087X1W8_HUMAN;A0A0A0MTJ8_HUMAN;A0A4Z1_HUMAN;CADM1_HUMAN;X5D7A8_HUMAN;X5D8W0_HUMAN;X5DNF2_HUMAN;X5DQR8_HUMAN;X5DQS5_HUMAN	DFRPLKDSR	47;47;87;88;88;88;88;88;88;88	_DFRPLKDSR_.3	_DFRPLKDSR_	1338210	858029	3.01093e+06
A0A087X1L8;A0N0L8;B7Z1W8;B7ZA28;B7ZA61;K4DIA0;O75144	A0A087X1L8;A0N0L8;B7Z1W8;B7ZA28;B7ZA61;K4DIA0;O75144	LOC102723996;ICOSLG;;;;ICOSLG;ICOSLG	A0A087X1L8_HUMAN;A0N0L8_HUMAN;B7Z1W8_HUMAN;B7ZA28_HUMAN;B7ZA61_HUMAN;K4DIA0_HUMAN;ICOSL_HUMAN	GLYDVVSVLR	78;195;110;110;110;195;195	_GLYDVVSVLR_.2	_GLYDVVSVLR_	4466397	8368410	3.98299e+06
A0A0A0MSA9;A0A0C4DG49;A8K4I1;B3KSS4;P15151	A0A0A0MSA9;A0A0C4DG49;A8K4I1;B3KSS4;P15151	PVR;PVR;;;PVR	A0A0A0MSA9_HUMAN;A0A0C4DG49_HUMAN;A8K4I1_HUMAN;B3KSS4_HUMAN;PVR_HUMAN	SVDIWLR	134;134;134;79;134	_SVDIWLR_.2	_SVDIWLR_	0	0	969526
A0A0A0MSA9;A0A0C4DG49;A8K4I1;B3KSS4;P15151	A0A0A0MSA9;A0A0C4DG49;A8K4I1;B3KSS4;P15151	PVR;PVR;;;PVR	A0A0A0MSA9_HUMAN;A0A0C4DG49_HUMAN;A8K4I1_HUMAN;B3KSS4_HUMAN;PVR_HUMAN	VLAKPQNTAEVQK	141;141;141;86;141	_VLAKPQNTAEVQK_.3	_VLAKPQNTAEVQK_	0	0	101930
A0A0A0MSI0;A0A384NPQ2;B2R4P2;Q06830	A0A0A0MSI0;A0A384NPQ2;B2R4P2;Q06830	PRDX1;;;PRDX1	A0A0A0MSI0_HUMAN;A0A384NPQ2_HUMAN;B2R4P2_HUMAN;PRDX1_HUMAN	QITVNDLPVGR	141;141;141;141	_QITVNDLPVGR_.2	_QITVNDLPVGR_	230089	0	0
A0A0A0N0L2;A0A0A0N0L5;A0A494BZU0;D6RH03;P40189;Q17RA0;Q5FC05	A0A0A0N0L2;A0A0A0N0L5;A0A494BZU0;D6RH03;P40189;Q17RA0;Q5FC05	IL6ST	A0A0A0N0L2_HUMAN;A0A0A0N0L5_HUMAN;A0A494BZU0_HUMAN;D6RH03_HUMAN;IL6RB_HUMAN;Q17RA0_HUMAN;Q5FC05_HUMAN	SSFTVQDLKPFTEYVFR	282;282;282;282;282;282;116	_SSFTVQDLKPFTEYVFR_.3	_SSFTVQDLKPFTEYVFR_	82514.2	92127.4	216735
A0A0B4J2C3;A0A0P1J1R0;P13693;Q5W0H4	A0A0B4J2C3;A0A0P1J1R0;P13693;Q5W0H4	TPT1;seTCTP;TPT1;TPT1	A0A0B4J2C3_HUMAN;A0A0P1J1R0_HUMAN;TCTP_HUMAN;Q5W0H4_HUMAN	GKLEEQRPER	101;101;101;101	_GKLEEQRPER_.3	_GKLEEQRPER_	0	0	23464.2
A0A0C4DGH0;A8K9J6;B4DK26;Q5ZPR3	A0A0C4DGH0;A8K9J6;B4DK26;Q5ZPR3	CD276;;;CD276	A0A0C4DGH0_HUMAN;A8K9J6_HUMAN;B4DK26_HUMAN;CD276_HUMAN	VADEGSFTCFVSIR	186;186;60,278;114,332	_VADEGSFTC[Carbamidomethyl (C)]FVSIR_.2	_VADEGSFTC[+57]FVSIR_	244591	0	15223.1
A0A0G2JPA8;A0A0J9YY65;C9JMH6;P08697	A0A0G2JPA8;A0A0J9YY65;C9JMH6;P08697	SERPINF2	A0A0G2JPA8_HUMAN;A0A0J9YY65_HUMAN;C9JMH6_HUMAN;A2AP_HUMAN	LCQDLGPGAFR	87;151;151;151	_LC[Carbamidomethyl (C)]QDLGPGAFR_.2	_LC[+57]QDLGPGAFR_	30442430	31709984	27300020
A0A0G2JPA8;A0A0J9YY65;C9JMH6;P08697	A0A0G2JPA8;A0A0J9YY65;C9JMH6;P08697	SERPINF2	A0A0G2JPA8_HUMAN;A0A0J9YY65_HUMAN;C9JMH6_HUMAN;A2AP_HUMAN	GFPIKEDFLEQSEQLFGAK	107;171;171;171	_GFPIKEDFLEQSEQLFGAK_.3	_GFPIKEDFLEQSEQLFGAK_	707099	478614	331074
A0A0K0K1L8;A0A384NQ35;Q06323	A0A0K0K1L8;A0A384NQ35;Q06323	HEL-S-129m;;PSME1	A0A0K0K1L8_HUMAN;A0A384NQ35_HUMAN;PSME1_HUMAN	IVVLLQR	110;108;110	_IVVLLQR_.2	_IVVLLQR_	3.35456	0	0
A0A0K2BMD8;A0A1K0GXZ1;A0A1S5UZ39;A0A385HVY8;A0A385HW02;A0A385HW21;A0A385HW63;D1MGQ2;I1VZV6;P69905	A0A0K2BMD8;A0A1K0GXZ1;A0A1S5UZ39;A0A385HVY8;A0A385HW02;A0A385HW21;A0A385HW63;D1MGQ2;I1VZV6;P69905	HBA2;GLNC1;HBA2;HBA2;HBA2;HBA2;HBA2;HBA2;HBA1;HBA2	A0A0K2BMD8_HUMAN;A0A1K0GXZ1_HUMAN;A0A1S5UZ39_HUMAN;A0A385HVY8_HUMAN;A0A385HW02_HUMAN;A0A385HW21_HUMAN;A0A385HW63_HUMAN;D1MGQ2_HUMAN;I1VZV6_HUMAN;HBA_HUMAN	VGAHAGEYGAEALER	18;53;18,63;18;18;18;18;18;18;18	_VGAHAGEYGAEALER_.3	_VGAHAGEYGAEALER_	5.27354e+06	28552656	7134697
A0A0K2BMD8;A0A1K0GXZ1;A0A1S5UZ39;A0A385HVY8;A0A385HW02;A0A385HW21;A0A385HW63;D1MGQ2;I1VZV6;P69905	A0A0K2BMD8;A0A1K0GXZ1;A0A1S5UZ39;A0A385HVY8;A0A385HW02;A0A385HW21;A0A385HW63;D1MGQ2;I1VZV6;P69905	HBA2;GLNC1;HBA2;HBA2;HBA2;HBA2;HBA2;HBA2;HBA1;HBA2	A0A0K2BMD8_HUMAN;A0A1K0GXZ1_HUMAN;A0A1S5UZ39_HUMAN;A0A385HVY8_HUMAN;A0A385HW02_HUMAN;A0A385HW21_HUMAN;A0A385HW63_HUMAN;D1MGQ2_HUMAN;I1VZV6_HUMAN;HBA_HUMAN	VGAHAGEYGAEALER	18;53;18,63;18;18;18;18;18;18;18	_VGAHAGEYGAEALER_.2	_VGAHAGEYGAEALER_	5.27354e+06	28552656	7134697
A0A0K2BMD8;A0A1K0GXZ1;A0A1S5UZ39;A0A385HVY8;A0A385HW02;A0A385HW21;A0A385HW63;D1MGQ2;I1VZV6;P69905	A0A0K2BMD8;A0A1K0GXZ1;A0A1S5UZ39;A0A385HVY8;A0A385HW02;A0A385HW21;A0A385HW63;D1MGQ2;I1VZV6;P69905	HBA2;GLNC1;HBA2;HBA2;HBA2;HBA2;HBA2;HBA2;HBA1;HBA2	A0A0K2BMD8_HUMAN;A0A1K0GXZ1_HUMAN;A0A1S5UZ39_HUMAN;A0A385HVY8_HUMAN;A0A385HW02_HUMAN;A0A385HW21_HUMAN;A0A385HW63_HUMAN;D1MGQ2_HUMAN;I1VZV6_HUMAN;HBA_HUMAN	VDPVNFK	94;129;139;94;94;94;93;94;94;94	_VDPVNFK_.2	_VDPVNFK_	5.25417e+06	19189344	20531058
A0A0K2BMD8;A0A1K0GXZ1;A0A1S5UZ39;A0A385HVY8;A0A385HW02;A0A385HW21;A0A385HW63;D1MGQ2;I1VZV6;P69905	A0A0K2BMD8;A0A1K0GXZ1;A0A1S5UZ39;A0A385HVY8;A0A385HW02;A0A385HW21;A0A385HW63;D1MGQ2;I1VZV6;P69905	HBA2;GLNC1;HBA2;HBA2;HBA2;HBA2;HBA2;HBA2;HBA1;HBA2	A0A0K2BMD8_HUMAN;A0A1K0GXZ1_HUMAN;A0A1S5UZ39_HUMAN;A0A385HVY8_HUMAN;A0A385HW02_HUMAN;A0A385HW21_HUMAN;A0A385HW63_HUMAN;D1MGQ2_HUMAN;I1VZV6_HUMAN;HBA_HUMAN	VDPVNFK	94;129;139;94;94;94;93;94;94;94	_VDPVNFK_.1	_VDPVNFK_	5.25417e+06	19189344	20531058
A0A0K2BMD8;A0A1K0GXZ1;A0A1S5UZ39;A0A385HVY8;A0A385HW02;A0A385HW21;A0A385HW63;D1MGQ2;I1VZV6;P69905	A0A0K2BMD8;A0A1K0GXZ1;A0A1S5UZ39;A0A385HVY8;A0A385HW02;A0A385HW21;A0A385HW63;D1MGQ2;I1VZV6;P69905	HBA2;GLNC1;HBA2;HBA2;HBA2;HBA2;HBA2;HBA2;HBA1;HBA2	A0A0K2BMD8_HUMAN;A0A1K0GXZ1_HUMAN;A0A1S5UZ39_HUMAN;A0A385HVY8_HUMAN;A0A385HW02_HUMAN;A0A385HW21_HUMAN;A0A385HW63_HUMAN;D1MGQ2_HUMAN;I1VZV6_HUMAN;HBA_HUMAN	MFLSFPTTK	33;68;33,78;33;33;33;33;33;33;33	_M[Oxidation (M)]FLSFPTTK_.2	_M[+16]FLSFPTTK_	13574702	19268252	14347144
A0A0K2BMD8;A0A1K0GXZ1;A0A1S5UZ39;A0A385HVY8;A0A385HW02;A0A385HW21;A0A385HW63;D1MGQ2;I1VZV6;P69905	A0A0K2BMD8;A0A1K0GXZ1;A0A1S5UZ39;A0A385HVY8;A0A385HW02;A0A385HW21;A0A385HW63;D1MGQ2;I1VZV6;P69905	HBA2;GLNC1;HBA2;HBA2;HBA2;HBA2;HBA2;HBA2;HBA1;HBA2	A0A0K2BMD8_HUMAN;A0A1K0GXZ1_HUMAN;A0A1S5UZ39_HUMAN;A0A385HVY8_HUMAN;A0A385HW02_HUMAN;A0A385HW21_HUMAN;A0A385HW63_HUMAN;D1MGQ2_HUMAN;I1VZV6_HUMAN;HBA_HUMAN	MFLSFPTTK	33;68;33,78;33;33;33;33;33;33;33	_MFLSFPTTK_.2	_MFLSFPTTK_	13574702	19268252	14347144
A0A0K2BMD8;A0A1K0GXZ1;A0A1S5UZ39;A0A385HVY8;A0A385HW02;A0A385HW21;A0A385HW63;D1MGQ2;I1VZV6;P69905	A0A0K2BMD8;A0A1K0GXZ1;A0A1S5UZ39;A0A385HVY8;A0A385HW02;A0A385HW21;A0A385HW63;D1MGQ2;I1VZV6;P69905	HBA2;GLNC1;HBA2;HBA2;HBA2;HBA2;HBA2;HBA2;HBA1;HBA2	A0A0K2BMD8_HUMAN;A0A1K0GXZ1_HUMAN;A0A1S5UZ39_HUMAN;A0A385HVY8_HUMAN;A0A385HW02_HUMAN;A0A385HW21_HUMAN;A0A385HW63_HUMAN;D1MGQ2_HUMAN;I1VZV6_HUMAN;HBA_HUMAN	TYFPHFDLSHGSAQVK	42;77;42,87;42;42;42;42;42;42;42	_TYFPHFDLSHGSAQVK_.4	_TYFPHFDLSHGSAQVK_	16117494	17541084	10759337
A0A0K2BMD8;A0A1K0GXZ1;A0A1S5UZ39;A0A385HVY8;A0A385HW02;A0A385HW21;A0A385HW63;D1MGQ2;I1VZV6;P69905	A0A0K2BMD8;A0A1K0GXZ1;A0A1S5UZ39;A0A385HVY8;A0A385HW02;A0A385HW21;A0A385HW63;D1MGQ2;I1VZV6;P69905	HBA2;GLNC1;HBA2;HBA2;HBA2;HBA2;HBA2;HBA2;HBA1;HBA2	A0A0K2BMD8_HUMAN;A0A1K0GXZ1_HUMAN;A0A1S5UZ39_HUMAN;A0A385HVY8_HUMAN;A0A385HW02_HUMAN;A0A385HW21_HUMAN;A0A385HW63_HUMAN;D1MGQ2_HUMAN;I1VZV6_HUMAN;HBA_HUMAN	TYFPHFDLSHGSAQVK	42;77;42,87;42;42;42;42;42;42;42	_TYFPHFDLSHGSAQVK_.3	_TYFPHFDLSHGSAQVK_	16117494	17541084	10759337
A0A0K2BMD8;A0A1K0GXZ1;A0A1S5UZ39;A0A385HVY8;A0A385HW02;A0A385HW21;A0A385HW63;D1MGQ2;I1VZV6;P69905	A0A0K2BMD8;A0A1K0GXZ1;A0A1S5UZ39;A0A385HVY8;A0A385HW02;A0A385HW21;A0A385HW63;D1MGQ2;I1VZV6;P69905	HBA2;GLNC1;HBA2;HBA2;HBA2;HBA2;HBA2;HBA2;HBA1;HBA2	A0A0K2BMD8_HUMAN;A0A1K0GXZ1_HUMAN;A0A1S5UZ39_HUMAN;A0A385HVY8_HUMAN;A0A385HW02_HUMAN;A0A385HW21_HUMAN;A0A385HW63_HUMAN;D1MGQ2_HUMAN;I1VZV6_HUMAN;HBA_HUMAN	FLASVSTVLTSK	129;164;174;129;129;129;128;129;129;129	_FLASVSTVLTSK_.2	_FLASVSTVLTSK_	1.00898e+06	299846	1702726
A0A0S2Z3D5;A0A0S2Z3V0;A0A346DBY2;J9ZVQ3;P02649	A0A0S2Z3D5;A0A0S2Z3V0;A0A346DBY2;J9ZVQ3;P02649	APOE	A0A0S2Z3D5_HUMAN;A0A0S2Z3V0_HUMAN;A0A346DBY2_HUMAN;J9ZVQ3_HUMAN;APOE_HUMAN	LQAEAFQAR	270;142;186;191;270	_LQAEAFQAR_.2	_LQAEAFQAR_	11783361	48480712	10007373
A0A0S2Z3D5;A0A0S2Z3V0;A0A346DBY2;J9ZVQ3;P02649	A0A0S2Z3D5;A0A0S2Z3V0;A0A346DBY2;J9ZVQ3;P02649	APOE	A0A0S2Z3D5_HUMAN;A0A0S2Z3V0_HUMAN;A0A346DBY2_HUMAN;J9ZVQ3_HUMAN;APOE_HUMAN	QWAGLVEK	293;165;209;214;293	_QWAGLVEK_.2	_QWAGLVEK_	2.61057e+06	11456115	848120
A0A0S2Z3D5;A0A0S2Z3V0;A0A346DBY2;J9ZVQ3;P02649	A0A0S2Z3D5;A0A0S2Z3V0;A0A346DBY2;J9ZVQ3;P02649	APOE	A0A0S2Z3D5_HUMAN;A0A0S2Z3V0_HUMAN;A0A346DBY2_HUMAN;J9ZVQ3_HUMAN;APOE_HUMAN	QWAGLVEK	293;165;209;214;293	_QWAGLVEK_.1	_QWAGLVEK_	2.61057e+06	11456115	848120
A0A0S2Z3D5;A0A0S2Z3V0;A0A346DBY2;J9ZVQ3;P02649	A0A0S2Z3D5;A0A0S2Z3V0;A0A346DBY2;J9ZVQ3;P02649	APOE	A0A0S2Z3D5_HUMAN;A0A0S2Z3V0_HUMAN;A0A346DBY2_HUMAN;J9ZVQ3_HUMAN;APOE_HUMAN	SWFEPLVEDMQR	281;153;197;202;281	_SWFEPLVEDMQR_.2	_SWFEPLVEDMQR_	152017	125343	631951
A0A0S2Z3D5;A0A0S2Z3V0;A0A346DBY2;J9ZVQ3;P02649	A0A0S2Z3D5;A0A0S2Z3V0;A0A346DBY2;J9ZVQ3;P02649	APOE	A0A0S2Z3D5_HUMAN;A0A0S2Z3V0_HUMAN;A0A346DBY2_HUMAN;J9ZVQ3_HUMAN;APOE_HUMAN	SWFEPLVEDMQR	281;153;197;202;281	_SWFEPLVEDM[Oxidation (M)]QR_.2	_SWFEPLVEDM[+16]QR_	152017	125343	631951
A0A0S2Z3D5;A0A0S2Z3V0;A0A346DBY2;J9ZVQ3;P02649	A0A0S2Z3D5;A0A0S2Z3V0;A0A346DBY2;J9ZVQ3;P02649	APOE	A0A0S2Z3D5_HUMAN;A0A0S2Z3V0_HUMAN;A0A346DBY2_HUMAN;J9ZVQ3_HUMAN;APOE_HUMAN	ELQAAQAR	114;114;35;35;114	_ELQAAQAR_.2	_ELQAAQAR_	13953229	11900212	10945404
A0A0S2Z3D5;A0A0S2Z3V0;A0A346DBY2;J9ZVQ3;P02649	A0A0S2Z3D5;A0A0S2Z3V0;A0A346DBY2;J9ZVQ3;P02649	APOE	A0A0S2Z3D5_HUMAN;A0A0S2Z3V0_HUMAN;A0A346DBY2_HUMAN;J9ZVQ3_HUMAN;APOE_HUMAN	ELQAAQAR	114;114;35;35;114	_ELQAAQAR_.1	_ELQAAQAR_	13953229	11900212	10945404
A0A0S2Z3Q6;A0A1B0RPQ4;A0A3B3ISD1;A0A804HIF1;A0A8I3B1S4;C1KBH7;D3DSX4;P11362	A0A0S2Z3Q6;A0A1B0RPQ4;A0A3B3ISD1;A0A804HIF1;A0A8I3B1S4;C1KBH7;D3DSX4;P11362	FGFR1	A0A0S2Z3Q6_HUMAN;A0A1B0RPQ4_HUMAN;A0A3B3ISD1_HUMAN;A0A804HIF1_HUMAN;A0A8I3B1S4_HUMAN;C1KBH7_HUMAN;D3DSX4_HUMAN;FGFR1_HUMAN	LRDDVQSINWLR	57;57;57;57;57;57;57;57	_LRDDVQSINWLR_.3	_LRDDVQSINWLR_	1.72156e+06	1.75582e+06	589079
A0A0S2Z3Q6;A0A1B0RPQ4;A0A3B3ISD1;A0A804HIF1;A0A8I3B1S4;C1KBH7;D3DSX4;P11362	A0A0S2Z3Q6;A0A1B0RPQ4;A0A3B3ISD1;A0A804HIF1;A0A8I3B1S4;C1KBH7;D3DSX4;P11362	FGFR1	A0A0S2Z3Q6_HUMAN;A0A1B0RPQ4_HUMAN;A0A3B3ISD1_HUMAN;A0A804HIF1_HUMAN;A0A8I3B1S4_HUMAN;C1KBH7_HUMAN;D3DSX4_HUMAN;FGFR1_HUMAN	IGPDNLPYVQILK	300;300;298;298;298;301;300;300	_IGPDNLPYVQILK_.2	_IGPDNLPYVQILK_	604553	1.03603e+06	617771
A0A0S2Z3Y1;B3KP88;B4DDG4;B4DVE1;Q08380	A0A0S2Z3Y1;B3KP88;B4DDG4;B4DVE1;Q08380	LGALS3BP;;;;LGALS3BP	A0A0S2Z3Y1_HUMAN;B3KP88_HUMAN;B4DDG4_HUMAN;B4DVE1_HUMAN;LG3BP_HUMAN	SDLAVPSELALLK	311;207;211;299;311	_SDLAVPSELALLK_.2	_SDLAVPSELALLK_	0	30362.3	0
A0A0S2Z3Y1;B3KP88;B4DDG4;B4DVE1;Q08380	A0A0S2Z3Y1;B3KP88;B4DDG4;B4DVE1;Q08380	LGALS3BP;;;;LGALS3BP	A0A0S2Z3Y1_HUMAN;B3KP88_HUMAN;B4DDG4_HUMAN;B4DVE1_HUMAN;LG3BP_HUMAN	AVDTWSWGER	324;220;224;312;324	_AVDTWSWGER_.2	_AVDTWSWGER_	8.63179	0	0
A0A0S2Z3Y1;B3KP88;B4DDG4;B4DVE1;Q08380	A0A0S2Z3Y1;B3KP88;B4DDG4;B4DVE1;Q08380	LGALS3BP;;;;LGALS3BP	A0A0S2Z3Y1_HUMAN;B3KP88_HUMAN;B4DDG4_HUMAN;B4DVE1_HUMAN;LG3BP_HUMAN	YSSDYFQAPSDYR	442;338;342;430;442	_YSSDYFQAPSDYR_.2	_YSSDYFQAPSDYR_	0	1900744	0
A0A0S2Z428;B4DRR0;P02538	A0A0S2Z428;B4DRR0;P02538	KRT6A;;KRT6A	A0A0S2Z428_HUMAN;B4DRR0_HUMAN;K2C6A_HUMAN	NKYEDEINKR	251;222;251	_NKYEDEINKR_.3	_NKYEDEINKR_	10359458	14888864	14617649
A0A0S2Z428;B4DRR0;P02538	A0A0S2Z428;B4DRR0;P02538	KRT6A;;KRT6A	A0A0S2Z428_HUMAN;B4DRR0_HUMAN;K2C6A_HUMAN	NKYEDEINKR	251;222;251	_NKYEDEINKR_.2	_NKYEDEINKR_	10359458	14888864	14617649
A0A0S2Z428;B4DRR0;P02538	A0A0S2Z428;B4DRR0;P02538	KRT6A;;KRT6A	A0A0S2Z428_HUMAN;B4DRR0_HUMAN;K2C6A_HUMAN	AQYEEIAQR	339;310;339	_AQYEEIAQR_.2	_AQYEEIAQR_	9581936	5.63572e+06	26071538
A0A0S2Z428;B4DRR0;P02538	A0A0S2Z428;B4DRR0;P02538	KRT6A;;KRT6A	A0A0S2Z428_HUMAN;B4DRR0_HUMAN;K2C6A_HUMAN	WTLLQEQGTK	195;166;195	_WTLLQEQGTK_.2	_WTLLQEQGTK_	14068062	16145787	17984360
A0A0S2Z428;B4DRR0;P02538	A0A0S2Z428;B4DRR0;P02538	KRT6A;;KRT6A	A0A0S2Z428_HUMAN;B4DRR0_HUMAN;K2C6A_HUMAN	ISIGGGSCAISGGYGSR	70;70;70	_ISIGGGSC[Carbamidomethyl (C)]AISGGYGSR_.2	_ISIGGGSC[+57]AISGGYGSR_	18436596	3753019	13010476
A0A0S2Z428;B4DRR0;P02538	A0A0S2Z428;B4DRR0;P02538	KRT6A;;KRT6A	A0A0S2Z428_HUMAN;B4DRR0_HUMAN;K2C6A_HUMAN	ASTSTTIR	2;2;2	_[Acetyl (Protein N-term)]ASTSTTIR_.2	_[+42]ASTSTTIR_	2.32575e+06	888161	10548694
A0A0S2Z428;B4DRR0;P02538	A0A0S2Z428;B4DRR0;P02538	KRT6A;;KRT6A	A0A0S2Z428_HUMAN;B4DRR0_HUMAN;K2C6A_HUMAN	ASTSTTIR	2;2;2	_[Acetyl (Protein N-term)]ASTSTTIR_.1	_[+42]ASTSTTIR_	2.32575e+06	888161	10548694
A0A0S2Z428;B4DRR0;P02538	A0A0S2Z428;B4DRR0;P02538	KRT6A;;KRT6A	A0A0S2Z428_HUMAN;B4DRR0_HUMAN;K2C6A_HUMAN	QLDSIVGER	224;195;224	_QLDSIVGER_.2	_QLDSIVGER_	700774	639844	567042
A0A0S2Z428;B4DRR0;P02538	A0A0S2Z428;B4DRR0;P02538	KRT6A;;KRT6A	A0A0S2Z428_HUMAN;B4DRR0_HUMAN;K2C6A_HUMAN	YEELQVTAGR	360;331;360	_YEELQVTAGR_.2	_YEELQVTAGR_	1.2544e+06	7.61204e+06	8644588
A0A0S2Z428;B4DRR0;P02538	A0A0S2Z428;B4DRR0;P02538	KRT6A;;KRT6A	A0A0S2Z428_HUMAN;B4DRR0_HUMAN;K2C6A_HUMAN	ADTLTDEINFLR	288;259;288	_ADTLTDEINFLR_.2	_ADTLTDEINFLR_	3023254	2482857	1.96975e+06
A0A0S2Z428;B4DRR0;P02538	A0A0S2Z428;B4DRR0;P02538	KRT6A;;KRT6A	A0A0S2Z428_HUMAN;B4DRR0_HUMAN;K2C6A_HUMAN	TAAENEFVTLK	261;232;261	_TAAENEFVTLK_.2	_TAAENEFVTLK_	931259	1.00891e+06	2.50408e+06
A0A0S2Z428;B4DRR0;P02538	A0A0S2Z428;B4DRR0;P02538	KRT6A;;KRT6A	A0A0S2Z428_HUMAN;B4DRR0_HUMAN;K2C6A_HUMAN	AIGGGLSSVGGGSSTIK	534;505;534	_AIGGGLSSVGGGSSTIK_.2	_AIGGGLSSVGGGSSTIK_	1.96399e+06	4.05804e+06	658499
A0A0S2Z428;B4DRR0;P02538	A0A0S2Z428;B4DRR0;P02538	KRT6A;;KRT6A	A0A0S2Z428_HUMAN;B4DRR0_HUMAN;K2C6A_HUMAN	SLYGLGGSKR	60;60;60	_SLYGLGGSKR_.2	_SLYGLGGSKR_	2.57216e+06	943400	2981897
A0A0S2Z428;B4DRR0;P02538	A0A0S2Z428;B4DRR0;P02538	KRT6A;;KRT6A	A0A0S2Z428_HUMAN;B4DRR0_HUMAN;K2C6A_HUMAN	LLEGEECR	468;439;468	_LLEGEEC[Carbamidomethyl (C)]R_.2	_LLEGEEC[+57]R_	2.44068e+06	1.89636e+06	3.1446e+06
A0A0S2Z428;B4DRR0;P02538	A0A0S2Z428;B4DRR0;P02538	KRT6A;;KRT6A	A0A0S2Z428_HUMAN;B4DRR0_HUMAN;K2C6A_HUMAN	GSGGLGGACGGAGFGSR	43;43;43	_GSGGLGGAC[Carbamidomethyl (C)]GGAGFGSR_.2	_GSGGLGGAC[+57]GGAGFGSR_	999089	3.22455e+06	1040765
A0A0S2Z428;B4DRR0;P02538	A0A0S2Z428;B4DRR0;P02538	KRT6A;;KRT6A	A0A0S2Z428_HUMAN;B4DRR0_HUMAN;K2C6A_HUMAN	NLDLDSIIAEVK	327;298;327	_NLDLDSIIAEVK_.2	_NLDLDSIIAEVK_	1.26678e+06	427325	1.95672e+06
A0A0S2Z428;B4DRR0;P02538	A0A0S2Z428;B4DRR0;P02538	KRT6A;;KRT6A	A0A0S2Z428_HUMAN;B4DRR0_HUMAN;K2C6A_HUMAN	QNLEPLFEQYINNLRR	208;179;208	_QNLEPLFEQYINNLRR_.3	_QNLEPLFEQYINNLRR_	354647	278939	357078
A0A0S2Z428;B4DRR0;P02538	A0A0S2Z428;B4DRR0;P02538	KRT6A;;KRT6A	A0A0S2Z428_HUMAN;B4DRR0_HUMAN;K2C6A_HUMAN	FASFIDKVR	174;145;174	_FASFIDKVR_.3	_FASFIDKVR_	858336	249888	517358
A0A0S2Z428;B4DRR0;P02538	A0A0S2Z428;B4DRR0;P02538	KRT6A;;KRT6A	A0A0S2Z428_HUMAN;B4DRR0_HUMAN;K2C6A_HUMAN	RGFSANSAR	16;16;16	_RGFSANSAR_.2	_RGFSANSAR_	845208	1.46034e+06	412233
A0A0S2Z428;B4DRR0;P02538	A0A0S2Z428;B4DRR0;P02538	KRT6A;;KRT6A	A0A0S2Z428_HUMAN;B4DRR0_HUMAN;K2C6A_HUMAN	YEDEINKR	253;224;253	_YEDEINKR_.2	_YEDEINKR_	908187	576546	753893
A0A0S2Z428;B4DRR0;P02538	A0A0S2Z428;B4DRR0;P02538	KRT6A;;KRT6A	A0A0S2Z428_HUMAN;B4DRR0_HUMAN;K2C6A_HUMAN	YEDEINKR	253;224;253	_YEDEINKR_.3	_YEDEINKR_	908187	576546	753893
A0A0S2Z428;B4DRR0;P02538	A0A0S2Z428;B4DRR0;P02538	KRT6A;;KRT6A	A0A0S2Z428_HUMAN;B4DRR0_HUMAN;K2C6A_HUMAN	TAAENEFVTLKK	261;232;261	_TAAENEFVTLKK_.3	_TAAENEFVTLKK_	218871	1.77526e+06	2162978
A0A0S2Z428;B4DRR0;P02538	A0A0S2Z428;B4DRR0;P02538	KRT6A;;KRT6A	A0A0S2Z428_HUMAN;B4DRR0_HUMAN;K2C6A_HUMAN	FASFIDK	174;145;174	_FASFIDK_.2	_FASFIDK_	10244006	2.81972e+06	9455814
A0A0S2Z428;B4DRR0;P02538	A0A0S2Z428;B4DRR0;P02538	KRT6A;;KRT6A	A0A0S2Z428_HUMAN;B4DRR0_HUMAN;K2C6A_HUMAN	FASFIDK	174;145;174	_FASFIDK_.1	_FASFIDK_	10244006	2.81972e+06	9455814
A0A0S2Z428;B4DRR0;P02538	A0A0S2Z428;B4DRR0;P02538	KRT6A;;KRT6A	A0A0S2Z428_HUMAN;B4DRR0_HUMAN;K2C6A_HUMAN	LALDVEIATYR	456;427;456	_LALDVEIATYR_.2	_LALDVEIATYR_	7.15442e+06	2.36099e+06	12256299
A0A0S2Z428;B4DRR0;P02538	A0A0S2Z428;B4DRR0;P02538	KRT6A;;KRT6A	A0A0S2Z428_HUMAN;B4DRR0_HUMAN;K2C6A_HUMAN	SGFSSVSVSR	31;31;31	_SGFSSVSVSR_.2	_SGFSSVSVSR_	0	0	528003
A0A0S2Z428;B4DRR0;P02538	A0A0S2Z428;B4DRR0;P02538	KRT6A;;KRT6A	A0A0S2Z428_HUMAN;B4DRR0_HUMAN;K2C6A_HUMAN	KLLEGEECR	467;438;467	_KLLEGEEC[Carbamidomethyl (C)]R_.2	_KLLEGEEC[+57]R_	419843	1.44014e+06	904296
A0A0S2Z428;B4DRR0;P02538	A0A0S2Z428;B4DRR0;P02538	KRT6A;;KRT6A	A0A0S2Z428_HUMAN;B4DRR0_HUMAN;K2C6A_HUMAN	KLLEGEECR	467;438;467	_KLLEGEEC[Carbamidomethyl (C)]R_.3	_KLLEGEEC[+57]R_	419843	1.44014e+06	904296
A0A0S2Z428;B4DRR0;P02538	A0A0S2Z428;B4DRR0;P02538	KRT6A;;KRT6A	A0A0S2Z428_HUMAN;B4DRR0_HUMAN;K2C6A_HUMAN	QNLEPLFEQYINNLR	208;179;208	_QNLEPLFEQYINNLR_.3	_QNLEPLFEQYINNLR_	143754	67305.9	193404
A0A0S2Z428;B4DRR0;P02538	A0A0S2Z428;B4DRR0;P02538	KRT6A;;KRT6A	A0A0S2Z428_HUMAN;B4DRR0_HUMAN;K2C6A_HUMAN	QNLEPLFEQYINNLR	208;179;208	_QNLEPLFEQYINNLR_.2	_QNLEPLFEQYINNLR_	143754	67305.9	193404
A0A0S2Z428;B4DRR0;P02538	A0A0S2Z428;B4DRR0;P02538	KRT6A;;KRT6A	A0A0S2Z428_HUMAN;B4DRR0_HUMAN;K2C6A_HUMAN	NTKQEIAEINR	376;347;376	_NTKQEIAEINR_.3	_NTKQEIAEINR_	373092	299168	720064
A0A0S2Z428;B4DRR0;P02538	A0A0S2Z428;B4DRR0;P02538	KRT6A;;KRT6A	A0A0S2Z428_HUMAN;B4DRR0_HUMAN;K2C6A_HUMAN	FLEQQNK	183;154;183	_FLEQQNK_.2	_FLEQQNK_	1.2763e+06	3190621	1.74408e+06
A0A0S2Z428;B4DRR0;P02538	A0A0S2Z428;B4DRR0;P02538	KRT6A;;KRT6A	A0A0S2Z428_HUMAN;B4DRR0_HUMAN;K2C6A_HUMAN	FLEQQNK	183;154;183	_FLEQQNK_.1	_FLEQQNK_	1.2763e+06	3190621	1.74408e+06
A0A0S2Z428;B4DRR0;P02538	A0A0S2Z428;B4DRR0;P02538	KRT6A;;KRT6A	A0A0S2Z428_HUMAN;B4DRR0_HUMAN;K2C6A_HUMAN	NKLEGLEDALQK	425;396;425	_NKLEGLEDALQK_.2	_NKLEGLEDALQK_	1.21119e+06	404490	1.47032e+06
A0A0S2Z428;B4DRR0;P02538	A0A0S2Z428;B4DRR0;P02538	KRT6A;;KRT6A	A0A0S2Z428_HUMAN;B4DRR0_HUMAN;K2C6A_HUMAN	NKLEGLEDALQK	425;396;425	_NKLEGLEDALQK_.3	_NKLEGLEDALQK_	1.21119e+06	404490	1.47032e+06
A0A0S2Z428;B4DRR0;P02538	A0A0S2Z428;B4DRR0;P02538	KRT6A;;KRT6A	A0A0S2Z428_HUMAN;B4DRR0_HUMAN;K2C6A_HUMAN	LALDVEIATYRK	456;427;456	_LALDVEIATYRK_.3	_LALDVEIATYRK_	3.37118e+06	5.51957e+06	1.46511e+06
A0A0S2Z428;B4DRR0;P02538	A0A0S2Z428;B4DRR0;P02538	KRT6A;;KRT6A	A0A0S2Z428_HUMAN;B4DRR0_HUMAN;K2C6A_HUMAN	SLYGLGGSK	60;60;60	_SLYGLGGSK_.2	_SLYGLGGSK_	0	435649	0
A0A0S2Z428;B4DRR0;P02538	A0A0S2Z428;B4DRR0;P02538	KRT6A;;KRT6A	A0A0S2Z428_HUMAN;B4DRR0_HUMAN;K2C6A_HUMAN	GRLDSELR	233;204;233	_GRLDSELR_.2	_GRLDSELR_	433737	498971	239961
A0A0S2Z428;B4DRR0;P02538	A0A0S2Z428;B4DRR0;P02538	KRT6A;;KRT6A	A0A0S2Z428_HUMAN;B4DRR0_HUMAN;K2C6A_HUMAN	QCANLQAAIADAEQR	401;372;401	_QC[Carbamidomethyl (C)]ANLQAAIADAEQR_.2	_QC[+57]ANLQAAIADAEQR_	2.81396e+06	0	0
A0A0S2Z428;B4DRR0;P02538	A0A0S2Z428;B4DRR0;P02538	KRT6A;;KRT6A	A0A0S2Z428_HUMAN;B4DRR0_HUMAN;K2C6A_HUMAN	NKYEDEINK	251;222;251	_NKYEDEINK_.2	_NKYEDEINK_	128410	120574	0
A0A0S2Z428;B4DRR0;P02538	A0A0S2Z428;B4DRR0;P02538	KRT6A;;KRT6A	A0A0S2Z428_HUMAN;B4DRR0_HUMAN;K2C6A_HUMAN	YTTTSSSSR	551;522;551	_YTTTSSSSR_.2	_YTTTSSSSR_	991916	1.05427e+06	979730
A0A0S2Z4G4;B2RDE1	A0A0S2Z4G4;B2RDE1	TPM3;	A0A0S2Z4G4_HUMAN;B2RDE1_HUMAN	AGITTIEAVKR	2;2	_[Acetyl (Protein N-term)]AGITTIEAVKR_.2	_[+42]AGITTIEAVKR_	14522120	13502541	12437074
A0A0S2Z4G4;B2RDE1	A0A0S2Z4G4;B2RDE1	TPM3;	A0A0S2Z4G4_HUMAN;B2RDE1_HUMAN	EQAEAEVASLNRR	43;43	_EQAEAEVASLNRR_.3	_EQAEAEVASLNRR_	1.41844e+06	745507	908457
A0A0S2Z4G4;B2RDE1	A0A0S2Z4G4;B2RDE1	TPM3;	A0A0S2Z4G4_HUMAN;B2RDE1_HUMAN	EQAEAEVASLNRR	43;43	_EQAEAEVASLNRR_.2	_EQAEAEVASLNRR_	1.41844e+06	745507	908457
A0A0S2Z4G4;B2RDE1	A0A0S2Z4G4;B2RDE1	TPM3;	A0A0S2Z4G4_HUMAN;B2RDE1_HUMAN	EQAEAEVASLNR	43;43	_EQAEAEVASLNR_.2	_EQAEAEVASLNR_	98393.2	204327	108729
A0A0S2Z4G4;B2RDE1	A0A0S2Z4G4;B2RDE1	TPM3;	A0A0S2Z4G4_HUMAN;B2RDE1_HUMAN	EQAEAEVASLNR	43;43	_EQAEAEVASLNR_.3	_EQAEAEVASLNR_	98393.2	204327	108729
A0A0S2Z4G4;B2RDE1	A0A0S2Z4G4;B2RDE1	TPM3;	A0A0S2Z4G4_HUMAN;B2RDE1_HUMAN	AGITTIEAVK	2;2	_[Acetyl (Protein N-term)]AGITTIEAVK_.2	_[+42]AGITTIEAVK_	1.46293e+06	747132	2185115
A0A0S2Z4G4;B2RDE1	A0A0S2Z4G4;B2RDE1	TPM3;	A0A0S2Z4G4_HUMAN;B2RDE1_HUMAN	AGITTIEAVK	2;2	_AGITTIEAVK_.2	_AGITTIEAVK_	1.46293e+06	747132	2185115
A0A0S2Z4G4;B2RDE1	A0A0S2Z4G4;B2RDE1	TPM3;	A0A0S2Z4G4_HUMAN;B2RDE1_HUMAN	KLVIIEGDLER	132;132	_KLVIIEGDLER_.3	_KLVIIEGDLER_	4.53724	0	370279
A0A0S2Z4G4;B2RDE1	A0A0S2Z4G4;B2RDE1	TPM3;	A0A0S2Z4G4_HUMAN;B2RDE1_HUMAN	KLVIIEGDLER	132;132	_KLVIIEGDLER_.2	_KLVIIEGDLER_	4.53724	0	370279
A0A0S2Z4G4;B2RDE1	A0A0S2Z4G4;B2RDE1	TPM3;	A0A0S2Z4G4_HUMAN;B2RDE1_HUMAN	KIQVLQQQADDAEER	13;13	_KIQVLQQQADDAEER_.3	_KIQVLQQQADDAEER_	0	0	1.9991e+06
A0A0S2Z4G4;B2RDE1	A0A0S2Z4G4;B2RDE1	TPM3;	A0A0S2Z4G4_HUMAN;B2RDE1_HUMAN	KIQVLQQQADDAEER	13;13	_KIQVLQQQADDAEER_.2	_KIQVLQQQADDAEER_	0	0	1.9991e+06
A0A0U2N547;A0A8I5KPX7;A0A8I5KQZ6;A0A8I5KR87;A0A8I5KS03;A0A8I5QKL5;A0A8I5QKP7;A0A8J8Z860;P10721	A0A0U2N547;A0A8I5KPX7;A0A8I5KQZ6;A0A8I5KR87;A0A8I5KS03;A0A8I5QKL5;A0A8I5QKP7;A0A8J8Z860;P10721	KIT	A0A0U2N547_HUMAN;A0A8I5KPX7_HUMAN;A0A8I5KQZ6_HUMAN;A0A8I5KR87_HUMAN;A0A8I5KS03_HUMAN;A0A8I5QKL5_HUMAN;A0A8I5QKP7_HUMAN;A0A8J8Z860_HUMAN;KIT_HUMAN	AVPVVSVSK	210;210;210;210;210;210;210;210;210	_AVPVVSVSK_.2	_AVPVVSVSK_	737523	1.37894e+06	1.89887e+06
A0A140VJC8;A0A218KGR2;B4DGD0;E9PG40;H7C0V9;P05067	A0A140VJC8;A0A218KGR2;B4DGD0;E9PG40;H7C0V9;P05067	;APP;;APP;APP;APP	A0A140VJC8_HUMAN;A0A218KGR2_HUMAN;B4DGD0_HUMAN;E9PG40_HUMAN;H7C0V9_HUMAN;A4_HUMAN	VESLEQEAANER	439;439;383;383;342;439	_VESLEQEAANER_.2	_VESLEQEAANER_	932623	1.56119e+06	751745
A0A140VJC8;A0A218KGR2;B4DGD0;E9PG40;H7C0V9;P05067	A0A140VJC8;A0A218KGR2;B4DGD0;E9PG40;H7C0V9;P05067	;APP;;APP;APP;APP	A0A140VJC8_HUMAN;A0A218KGR2_HUMAN;B4DGD0_HUMAN;E9PG40_HUMAN;H7C0V9_HUMAN;A4_HUMAN	WYFDVTEGK	307;307;251;251;229;307	_WYFDVTEGK_.2	_WYFDVTEGK_	305708	0	0
A0A140VJJ6;C9JC84;C9JEU5;P02679	A0A140VJJ6;C9JC84;C9JEU5;P02679	;FGG;FGG;FGG	A0A140VJJ6_HUMAN;C9JC84_HUMAN;C9JEU5_HUMAN;FIBG_HUMAN	DNCCILDER	32;32;32;32	_DNC[Carbamidomethyl (C)]C[Carbamidomethyl (C)]ILDER_.2	_DNC[+57]C[+57]ILDER_	231478	600044	379401
A0A140VK24;I3L1Q6;J3QKT0;J3QSE5;P04180	A0A140VK24;I3L1Q6;J3QKT0;J3QSE5;P04180	;LCAT;LCAT;LCAT;LCAT	A0A140VK24_HUMAN;I3L1Q6_HUMAN;J3QKT0_HUMAN;J3QSE5_HUMAN;LCAT_HUMAN	TYSVEYLDSSK	130;40;11;58;130	_TYSVEYLDSSK_.2	_TYSVEYLDSSK_	220694	252150	31595.5
A0A140VKA6;B4E0U6;B7ZA40;H7C3I1;P50502;Q0IJ56;Q1XBU6;Q8IZP2	A0A140VKA6;B4E0U6;B7ZA40;H7C3I1;P50502;Q0IJ56;Q1XBU6;Q8IZP2	;;;ST13;ST13;ST13;;ST13P4	A0A140VKA6_HUMAN;B4E0U6_HUMAN;B7ZA40_HUMAN;H7C3I1_HUMAN;F10A1_HUMAN;Q0IJ56_HUMAN;Q1XBU6_HUMAN;ST134_HUMAN	LLGHWEEAAHDLALACK	194;184;96;107;194;194;80;190	_LLGHWEEAAHDLALAC[Carbamidomethyl (C)]K_.3	_LLGHWEEAAHDLALAC[+57]K_	1.47855e+06	0	0
A0A140VKF3;I3L1U4;I3L2R7;I3L3Z3;I3L425;I3L4Z0;P36955	A0A140VKF3;I3L1U4;I3L2R7;I3L3Z3;I3L425;I3L4Z0;P36955	;SERPINF1;SERPINF1;SERPINF1;SERPINF1;SERPINF1;SERPINF1	A0A140VKF3_HUMAN;I3L1U4_HUMAN;I3L2R7_HUMAN;I3L3Z3_HUMAN;I3L425_HUMAN;I3L4Z0_HUMAN;PEDF_HUMAN	LAAAVSNFGYDLYR	54;54;54;54;54;41;54	_LAAAVSNFGYDLYR_.2	_LAAAVSNFGYDLYR_	448691	463799	1.20523e+06
A0A158RFU3;P20962	A0A158RFU3;P20962	PTMS	A0A158RFU3_HUMAN;PTMS_HUMAN	SVEAAAELSAK	5;5	_SVEAAAELSAK_.2	_SVEAAAELSAK_	671365	0	517098
A0A161I202;A8K494;B2MV14;B3KSL2;B3VMW0;B4E1V0;B7ZAL5;E7EQB2;E7ER44;P02788;Q2TUW9;Q5EK51;V9HWI4;W8QEY1	A0A161I202;A8K494;B2MV14;B3KSL2;B3VMW0;B4E1V0;B7ZAL5;E7EQB2;E7ER44;P02788;Q2TUW9;Q5EK51;V9HWI4;W8QEY1	LTF;;LTF;;;;;LTF;LTF;LTF;;;HEL110;	A0A161I202_HUMAN;A8K494_HUMAN;B2MV14_HUMAN;B3KSL2_HUMAN;B3VMW0_HUMAN;B4E1V0_HUMAN;B7ZAL5_HUMAN;E7EQB2_HUMAN;E7ER44_HUMAN;TRFL_HUMAN;Q2TUW9_HUMAN;Q5EK51_HUMAN;V9HWI4_HUMAN;W8QEY1_HUMAN	YYGYTGAFR	545;545;545;532;545;134;500;531;542;544;543;545;544;545	_YYGYTGAFR_.2	_YYGYTGAFR_	8215822	2636901	1.3366e+06
A0A1B0GVI3;P13645	A0A1B0GVI3;P13645	KRT10	A0A1B0GVI3_HUMAN;K1C10_HUMAN	VLDELTLTK	258;258	_VLDELTLTK_.2	_VLDELTLTK_	87446328	92363608	83824704
A0A1B0GVI3;P13645	A0A1B0GVI3;P13645	KRT10	A0A1B0GVI3_HUMAN;K1C10_HUMAN	GSLGGGFSSGGFSGGSFSR	41;41	_GSLGGGFSSGGFSGGSFSR_.2	_GSLGGGFSSGGFSGGSFSR_	46420176	53420068	25643196
A0A1B0GVI3;P13645	A0A1B0GVI3;P13645	KRT10	A0A1B0GVI3_HUMAN;K1C10_HUMAN	DAEAWFNEK	335;335	_DAEAWFNEK_.2	_DAEAWFNEK_	49976388	64153484	60013776
A0A1B0GVI3;P13645	A0A1B0GVI3;P13645	KRT10	A0A1B0GVI3_HUMAN;K1C10_HUMAN	SLLEGEGSSGGGGR	451;451	_SLLEGEGSSGGGGR_.2	_SLLEGEGSSGGGGR_	9151846	4954551	15530017
A0A1B0GVI3;P13645	A0A1B0GVI3;P13645	KRT10	A0A1B0GVI3_HUMAN;K1C10_HUMAN	LKYENEVALR	236;236	_LKYENEVALR_.2	_LKYENEVALR_	14560698	20429866	21699006
A0A1B0GVI3;P13645	A0A1B0GVI3;P13645	KRT10	A0A1B0GVI3_HUMAN;K1C10_HUMAN	LKYENEVALR	236;236	_LKYENEVALR_.3	_LKYENEVALR_	14560698	20429866	21699006
A0A1B0GVI3;P13645	A0A1B0GVI3;P13645	KRT10	A0A1B0GVI3_HUMAN;K1C10_HUMAN	LENEIQTYR	442;442	_LENEIQTYR_.2	_LENEIQTYR_	7.09891e+06	32741792	7814220
A0A1B0GVI3;P13645	A0A1B0GVI3;P13645	KRT10	A0A1B0GVI3_HUMAN;K1C10_HUMAN	QSLEASLAETEGR	387;387	_QSLEASLAETEGR_.2	_QSLEASLAETEGR_	24659000	9759095	4.02167e+06
A0A1B0GVI3;P13645	A0A1B0GVI3;P13645	KRT10	A0A1B0GVI3_HUMAN;K1C10_HUMAN	QSVEADINGLRR	246;246	_QSVEADINGLRR_.3	_QSVEADINGLRR_	2.87877e+06	11023606	10479117
A0A1B0GVI3;P13645	A0A1B0GVI3;P13645	KRT10	A0A1B0GVI3_HUMAN;K1C10_HUMAN	QSVEADINGLRR	246;246	_QSVEADINGLRR_.2	_QSVEADINGLRR_	2.87877e+06	11023606	10479117
A0A1B0GVI3;P13645	A0A1B0GVI3;P13645	KRT10	A0A1B0GVI3_HUMAN;K1C10_HUMAN	IRLENEIQTYR	440;440	_IRLENEIQTYR_.3	_IRLENEIQTYR_	3.38242e+06	4943962	2787937
A0A1B0GVI3;P13645	A0A1B0GVI3;P13645	KRT10	A0A1B0GVI3_HUMAN;K1C10_HUMAN	IRLENEIQTYR	440;440	_IRLENEIQTYR_.2	_IRLENEIQTYR_	3.38242e+06	4943962	2787937
A0A1B0GVI3;P13645	A0A1B0GVI3;P13645	KRT10	A0A1B0GVI3_HUMAN;K1C10_HUMAN	ALEESNYELEGK	166;166	_ALEESNYELEGK_.2	_ALEESNYELEGK_	8.31541e+06	27759688	34140356
A0A1B0GVI3;P13645	A0A1B0GVI3;P13645	KRT10	A0A1B0GVI3_HUMAN;K1C10_HUMAN	YENEVALR	238;238	_YENEVALR_.2	_YENEVALR_	8939320	10192802	3908751
A0A1B0GVI3;P13645	A0A1B0GVI3;P13645	KRT10	A0A1B0GVI3_HUMAN;K1C10_HUMAN	SEITELRR	363;363	_SEITELRR_.2	_SEITELRR_	7.10561e+06	4534181	17213032
A0A1B0GVI3;P13645	A0A1B0GVI3;P13645	KRT10	A0A1B0GVI3_HUMAN;K1C10_HUMAN	GSSGGGCFGGSSGGYGGLGGFGGGSFR	60;60	_GSSGGGC[Carbamidomethyl (C)]FGGSSGGYGGLGGFGGGSFR_.3	_GSSGGGC[+57]FGGSSGGYGGLGGFGGGSFR_	5.80599e+06	4.6521e+06	4.12115e+06
A0A1B0GVI3;P13645	A0A1B0GVI3;P13645	KRT10	A0A1B0GVI3_HUMAN;K1C10_HUMAN	SQYEQLAEQNRK	323;323	_SQYEQLAEQNRK_.3	_SQYEQLAEQNRK_	3.61537e+06	2809597	2.21746e+06
A0A1B0GVI3;P13645	A0A1B0GVI3;P13645	KRT10	A0A1B0GVI3_HUMAN;K1C10_HUMAN	SQYEQLAEQNRK	323;323	_SQYEQLAEQNRK_.2	_SQYEQLAEQNRK_	3.61537e+06	2809597	2.21746e+06
A0A1B0GVI3;P13645	A0A1B0GVI3;P13645	KRT10	A0A1B0GVI3_HUMAN;K1C10_HUMAN	SQYEQLAEQNR	323;323	_SQYEQLAEQNR_.2	_SQYEQLAEQNR_	2189317	1.20616e+06	4399087
A0A1B0GVI3;P13645	A0A1B0GVI3;P13645	KRT10	A0A1B0GVI3_HUMAN;K1C10_HUMAN	SEITELR	363;363	_SEITELR_.2	_SEITELR_	2.49054e+06	3.81173e+06	1172637
A0A1B0GVI3;P13645	A0A1B0GVI3;P13645	KRT10	A0A1B0GVI3_HUMAN;K1C10_HUMAN	QSVEADINGLR	246;246	_QSVEADINGLR_.2	_QSVEADINGLR_	3.30618e+06	3.6831e+06	605256
A0A1B0GVI3;P13645	A0A1B0GVI3;P13645	KRT10	A0A1B0GVI3_HUMAN;K1C10_HUMAN	SGGGGGGGGCGGGGGVSSLR	16;16	_SGGGGGGGGC[Carbamidomethyl (C)]GGGGGVSSLR_.2	_SGGGGGGGGC[+57]GGGGGVSSLR_	536516	434332	407419
A0A1B0GVI3;P13645	A0A1B0GVI3;P13645	KRT10	A0A1B0GVI3_HUMAN;K1C10_HUMAN	NHEEEMKDLR	286;286	_NHEEEMKDLR_.3	_NHEEEMKDLR_	701769	469906	798404
A0A1B0GVI3;P13645	A0A1B0GVI3;P13645	KRT10	A0A1B0GVI3_HUMAN;K1C10_HUMAN	ELTTEIDNNIEQISSYK	346;346	_ELTTEIDNNIEQISSYK_.2	_ELTTEIDNNIEQISSYK_	863773	490739	2112447
A0A1B0GVI3;P13645	A0A1B0GVI3;P13645	KRT10	A0A1B0GVI3_HUMAN;K1C10_HUMAN	ADLEMQIESLTEELAYLKK	267;267	_ADLEM[Oxidation (M)]QIESLTEELAYLKK_.3	_ADLEM[+16]QIESLTEELAYLKK_	395907	732634	419587
A0A1B0GVI3;P13645	A0A1B0GVI3;P13645	KRT10	A0A1B0GVI3_HUMAN;K1C10_HUMAN	ADLEMQIESLTEELAYLKK	267;267	_ADLEMQIESLTEELAYLKK_.3	_ADLEMQIESLTEELAYLKK_	395907	732634	419587
A0A1B0GVI3;P13645	A0A1B0GVI3;P13645	KRT10	A0A1B0GVI3_HUMAN;K1C10_HUMAN	NVQALEIELQSQLALK	371;371	_NVQALEIELQSQLALK_.3	_NVQALEIELQSQLALK_	510041	355992	381425
A0A1B0GVI3;P13645	A0A1B0GVI3;P13645	KRT10	A0A1B0GVI3_HUMAN;K1C10_HUMAN	NVQALEIELQSQLALK	371;371	_NVQALEIELQSQLALK_.2	_NVQALEIELQSQLALK_	510041	355992	381425
A0A1B0GVI3;P13645	A0A1B0GVI3;P13645	KRT10	A0A1B0GVI3_HUMAN;K1C10_HUMAN	IKEWYEK	178;178	_IKEWYEK_.2	_IKEWYEK_	3643616	2.25789e+06	10826150
A0A1B0GVI3;P13645	A0A1B0GVI3;P13645	KRT10	A0A1B0GVI3_HUMAN;K1C10_HUMAN	SKELTTEIDNNIEQISSYK	344;344	_SKELTTEIDNNIEQISSYK_.3	_SKELTTEIDNNIEQISSYK_	3.39821e+06	3.98479e+06	3.0985e+06
A0A1B0GVI3;P13645	A0A1B0GVI3;P13645	KRT10	A0A1B0GVI3_HUMAN;K1C10_HUMAN	YCVQLSQIQAQISALEEQLQQIR	400;400	_YC[Carbamidomethyl (C)]VQLSQIQAQISALEEQLQQIR_.3	_YC[+57]VQLSQIQAQISALEEQLQQIR_	963238	975078	763089
A0A1B0GVI3;P13645	A0A1B0GVI3;P13645	KRT10	A0A1B0GVI3_HUMAN;K1C10_HUMAN	TIDDLKNQILNLTTDNANILLQIDNAR	202;202	_TIDDLKNQILNLTTDNANILLQIDNAR_.4	_TIDDLKNQILNLTTDNANILLQIDNAR_	104942	107540	73664.2
A0A1B0GVI3;P13645	A0A1B0GVI3;P13645	KRT10	A0A1B0GVI3_HUMAN;K1C10_HUMAN	ADLEMQIESLTEELAYLK	267;267	_ADLEM[Oxidation (M)]QIESLTEELAYLK_.3	_ADLEM[+16]QIESLTEELAYLK_	38444.1	46945.6	26485.5
A0A1B0GVI3;P13645	A0A1B0GVI3;P13645	KRT10	A0A1B0GVI3_HUMAN;K1C10_HUMAN	SSSSGSVGESSSK	568;568	_SSSSGSVGESSSK_.2	_SSSSGSVGESSSK_	142097	184209	0
A0A1S5UZ16;D3YTG3;H7C556;Q7Z7G0	A0A1S5UZ16;D3YTG3;H7C556;Q7Z7G0	ABI3BP	A0A1S5UZ16_HUMAN;D3YTG3_HUMAN;H7C556_HUMAN;TARSH_HUMAN	FYNIGDQR	1024;1710;1146;992	_FYNIGDQR_.2	_FYNIGDQR_	9267.49	352788	539771
A0A1S5UZ16;D3YTG3;H7C556;Q7Z7G0	A0A1S5UZ16;D3YTG3;H7C556;Q7Z7G0	ABI3BP	A0A1S5UZ16_HUMAN;D3YTG3_HUMAN;H7C556_HUMAN;TARSH_HUMAN	VSEPVSAGR	962;1648;1084;930	_VSEPVSAGR_.2	_VSEPVSAGR_	137765	215174	194252
A0A1S5UZ16;D3YTG3;H7C556;Q7Z7G0	A0A1S5UZ16;D3YTG3;H7C556;Q7Z7G0	ABI3BP	A0A1S5UZ16_HUMAN;D3YTG3_HUMAN;H7C556_HUMAN;TARSH_HUMAN	IYLSDSLTGK	1014;1700;1136;982	_IYLSDSLTGK_.2	_IYLSDSLTGK_	2.36139e+06	4.0153e+06	3688905
A0A1S5UZ16;D3YTG3;H7C556;Q7Z7G0	A0A1S5UZ16;D3YTG3;H7C556;Q7Z7G0	ABI3BP	A0A1S5UZ16_HUMAN;D3YTG3_HUMAN;H7C556_HUMAN;TARSH_HUMAN	ETDPLGKPR	814;1500;936;782	_ETDPLGKPR_.2	_ETDPLGKPR_	49625.4	0	0
A0A1S5UZ31;Q9H2D6	A0A1S5UZ31;Q9H2D6	TRIOBP	A0A1S5UZ31_HUMAN;TARA_HUMAN	TPEVPAGEGPR	1937;1997	_TPEVPAGEGPR_.2	_TPEVPAGEGPR_	0	1.30942e+06	10114814
A0A1U9X793;I2D5I8;I2D5J2;O95445;Q5SRP5	A0A1U9X793;I2D5I8;I2D5J2;O95445;Q5SRP5	;APOM;APOM;APOM;APOM	A0A1U9X793_HUMAN;I2D5I8_HUMAN;I2D5J2_HUMAN;APOM_HUMAN;Q5SRP5_HUMAN	AFLLTPR	100;57;57;172;100	_AFLLTPR_.2	_AFLLTPR_	2.5432e+06	2.29651e+06	2.87765e+06
A0A1U9X796;A0A1U9X799;Q6AZW6;Q99941	A0A1U9X796;A0A1U9X799;Q6AZW6;Q99941	;;ATF6B;ATF6B	A0A1U9X796_HUMAN;A0A1U9X799_HUMAN;Q6AZW6_HUMAN;ATF6B_HUMAN	EDTFYVVSFR	586;586;589;589	_EDTFYVVSFR_.2	_EDTFYVVSFR_	1.18048e+06	285242	1.00012e+06
A0A1U9X796;A0A1U9X799;Q6AZW6;Q99941	A0A1U9X796;A0A1U9X799;Q6AZW6;Q99941	;;ATF6B;ATF6B	A0A1U9X796_HUMAN;A0A1U9X799_HUMAN;Q6AZW6_HUMAN;ATF6B_HUMAN	LADELSGWVQR	509;509;512;512	_LADELSGWVQR_.2	_LADELSGWVQR_	0	3.53565	0
A0A1W2PQZ2;E9PKE5;E9PKX7;E9PQD5;E9PRV0;Q9UID3	A0A1W2PQZ2;E9PKE5;E9PKX7;E9PQD5;E9PRV0;Q9UID3	VPS51	A0A1W2PQZ2_HUMAN;E9PKE5_HUMAN;E9PKX7_HUMAN;E9PQD5_HUMAN;E9PRV0_HUMAN;VPS51_HUMAN	AAAAAAGPSPGSGPGDSPEGPEGEAPER	2;2;2;2;2;2	_[Acetyl (Protein N-term)]AAAAAAGPSPGSGPGDSPEGPEGEAPER_.3	_[+42]AAAAAAGPSPGSGPGDSPEGPEGEAPER_	12.0166	0	42646.7
A0A2R8Y793;B4E335;B4E3A4;E7EVS6;I3L4N8;P60709;P63261;Q1KLZ0;Q53G76;Q53G99;Q53GK6;Q8WVW5	A0A2R8Y793;B4E335;B4E3A4;E7EVS6;I3L4N8;P60709;P63261;Q1KLZ0;Q53G76;Q53G99;Q53GK6;Q8WVW5	ACTB;;;ACTB;ACTG1;ACTB;ACTG1;PS1TP5BP1;;;;	A0A2R8Y793_HUMAN;B4E335_HUMAN;B4E3A4_HUMAN;E7EVS6_HUMAN;I3L4N8_HUMAN;ACTB_HUMAN;ACTG_HUMAN;Q1KLZ0_HUMAN;Q53G76_HUMAN;Q53G99_HUMAN;Q53GK6_HUMAN;Q8WVW5_HUMAN	AVFPSIVGRPR	29;29;29;29;29;29;29;29;29;29;29;17	_AVFPSIVGRPR_.3	_AVFPSIVGRPR_	4.25673e+06	4.35005e+06	3.44024e+06
A0A2R8Y793;B4E335;B4E3A4;E7EVS6;I3L4N8;P60709;P63261;Q1KLZ0;Q53G76;Q53G99;Q53GK6;Q8WVW5	A0A2R8Y793;B4E335;B4E3A4;E7EVS6;I3L4N8;P60709;P63261;Q1KLZ0;Q53G76;Q53G99;Q53GK6;Q8WVW5	ACTB;;;ACTB;ACTG1;ACTB;ACTG1;PS1TP5BP1;;;;	A0A2R8Y793_HUMAN;B4E335_HUMAN;B4E3A4_HUMAN;E7EVS6_HUMAN;I3L4N8_HUMAN;ACTB_HUMAN;ACTG_HUMAN;Q1KLZ0_HUMAN;Q53G76_HUMAN;Q53G99_HUMAN;Q53GK6_HUMAN;Q8WVW5_HUMAN	AGFAGDDAPR	19;19;19;19;19;19;19;19;19;19;19;7	_AGFAGDDAPR_.2	_AGFAGDDAPR_	1.12694e+06	1189315	2.97026e+06
A0A2R8Y793;B4E335;B4E3A4;E7EVS6;I3L4N8;P60709;P63261;Q1KLZ0;Q53G76;Q53G99;Q53GK6;Q8WVW5	A0A2R8Y793;B4E335;B4E3A4;E7EVS6;I3L4N8;P60709;P63261;Q1KLZ0;Q53G76;Q53G99;Q53GK6;Q8WVW5	ACTB;;;ACTB;ACTG1;ACTB;ACTG1;PS1TP5BP1;;;;	A0A2R8Y793_HUMAN;B4E335_HUMAN;B4E3A4_HUMAN;E7EVS6_HUMAN;I3L4N8_HUMAN;ACTB_HUMAN;ACTG_HUMAN;Q1KLZ0_HUMAN;Q53G76_HUMAN;Q53G99_HUMAN;Q53GK6_HUMAN;Q8WVW5_HUMAN	AVFPSIVGR	29;29;29;29;29;29;29;29;29;29;29;17	_AVFPSIVGR_.2	_AVFPSIVGR_	622624	531999	108135
A0A2R8Y793;B4E335;B4E3A4;E7EVS6;I3L4N8;P60709;P63261;Q1KLZ0;Q53G76;Q53G99;Q53GK6;Q8WVW5	A0A2R8Y793;B4E335;B4E3A4;E7EVS6;I3L4N8;P60709;P63261;Q1KLZ0;Q53G76;Q53G99;Q53GK6;Q8WVW5	ACTB;;;ACTB;ACTG1;ACTB;ACTG1;PS1TP5BP1;;;;	A0A2R8Y793_HUMAN;B4E335_HUMAN;B4E3A4_HUMAN;E7EVS6_HUMAN;I3L4N8_HUMAN;ACTB_HUMAN;ACTG_HUMAN;Q1KLZ0_HUMAN;Q53G76_HUMAN;Q53G99_HUMAN;Q53GK6_HUMAN;Q8WVW5_HUMAN	SYELPDGQVITIGNER	223;215;220;239;215;239;239;239;239;239;239;227	_SYELPDGQVITIGNER_.2	_SYELPDGQVITIGNER_	0	0	301568
A0A2R8Y793;B4E335;B4E3A4;E7EVS6;I3L4N8;P60709;P63261;Q1KLZ0;Q53G76;Q53G99;Q53GK6;Q8WVW5	A0A2R8Y793;B4E335;B4E3A4;E7EVS6;I3L4N8;P60709;P63261;Q1KLZ0;Q53G76;Q53G99;Q53GK6;Q8WVW5	ACTB;;;ACTB;ACTG1;ACTB;ACTG1;PS1TP5BP1;;;;	A0A2R8Y793_HUMAN;B4E335_HUMAN;B4E3A4_HUMAN;E7EVS6_HUMAN;I3L4N8_HUMAN;ACTB_HUMAN;ACTG_HUMAN;Q1KLZ0_HUMAN;Q53G76_HUMAN;Q53G99_HUMAN;Q53GK6_HUMAN;Q8WVW5_HUMAN	GYSFTTTAER	181;173;178;197;173;197;197;197;197;197;197;185	_GYSFTTTAER_.2	_GYSFTTTAER_	806440	0	0
A0A2U3TZL5;E9PNW4;P13987;Q6FHM9	A0A2U3TZL5;E9PNW4;P13987;Q6FHM9	CD59;;CD59;CD59	A0A2U3TZL5_HUMAN;E9PNW4_HUMAN;CD59_HUMAN;Q6FHM9_HUMAN	AGLQVYNK	56;56;56;56	_AGLQVYNK_.2	_AGLQVYNK_	479431	172261	645252
A0A2U3TZL5;E9PNW4;P13987;Q6FHM9	A0A2U3TZL5;E9PNW4;P13987;Q6FHM9	CD59;;CD59;CD59	A0A2U3TZL5_HUMAN;E9PNW4_HUMAN;CD59_HUMAN;Q6FHM9_HUMAN	LRENELTYYCCK	79;79;79;79	_LRENELTYYC[Carbamidomethyl (C)]C[Carbamidomethyl (C)]K_.3	_LRENELTYYC[+57]C[+57]K_	138817	0	0
A0A2U3TZL5;E9PNW4;P13987;Q6FHM9	A0A2U3TZL5;E9PNW4;P13987;Q6FHM9	CD59;;CD59;CD59	A0A2U3TZL5_HUMAN;E9PNW4_HUMAN;CD59_HUMAN;Q6FHM9_HUMAN	LRENELTYYCCK	79;79;79;79	_LRENELTYYC[Carbamidomethyl (C)]C[Carbamidomethyl (C)]K_.2	_LRENELTYYC[+57]C[+57]K_	138817	0	0
A0A384MDM4;P35555	A0A384MDM4;P35555	;FBN1	A0A384MDM4_HUMAN;FBN1_HUMAN	YLIESGNEDGFFK	2793;2793	_YLIESGNEDGFFK_.2	_YLIESGNEDGFFK_	3.16337e+06	1841779	4703646
A0A384MDM4;P35555	A0A384MDM4;P35555	;FBN1	A0A384MDM4_HUMAN;FBN1_HUMAN	ILELLPALTTLTNHNR	2777;2777	_ILELLPALTTLTNHNR_.3	_ILELLPALTTLTNHNR_	567969	370708	492271
A0A384MDM4;P35555	A0A384MDM4;P35555	;FBN1	A0A384MDM4_HUMAN;FBN1_HUMAN	ILELLPALTTLTNHNR	2777;2777	_ILELLPALTTLTNHNR_.2	_ILELLPALTTLTNHNR_	567969	370708	492271
A0A384MDM4;P35555	A0A384MDM4;P35555	;FBN1	A0A384MDM4_HUMAN;FBN1_HUMAN	KKPVAGTYSLQISSTPLYK	2820;2820	_KKPVAGTYSLQISSTPLYK_.3	_KKPVAGTYSLQISSTPLYK_	1.13809e+06	1326950	900014
A0A384MDM4;P35555	A0A384MDM4;P35555	;FBN1	A0A384MDM4_HUMAN;FBN1_HUMAN	KKPVAGTYSLQISSTPLYK	2820;2820	_KKPVAGTYSLQISSTPLYK_.4	_KKPVAGTYSLQISSTPLYK_	1.13809e+06	1326950	900014
A0A384MDM4;P35555	A0A384MDM4;P35555	;FBN1	A0A384MDM4_HUMAN;FBN1_HUMAN	EGISYLHFTK	2810;2810	_EGISYLHFTK_.3	_EGISYLHFTK_	1.35536e+06	737593	1.56607e+06
A0A384MDM4;P35555	A0A384MDM4;P35555	;FBN1	A0A384MDM4_HUMAN;FBN1_HUMAN	EGISYLHFTK	2810;2810	_EGISYLHFTK_.2	_EGISYLHFTK_	1.35536e+06	737593	1.56607e+06
A0A384MDM4;P35555	A0A384MDM4;P35555	;FBN1	A0A384MDM4_HUMAN;FBN1_HUMAN	KPVAGTYSLQISSTPLYK	2821;2821	_KPVAGTYSLQISSTPLYK_.3	_KPVAGTYSLQISSTPLYK_	473918	5.4605	113715
A0A384MDP3;P12110	A0A384MDP3;P12110	;COL6A2	A0A384MDP3_HUMAN;CO6A2_HUMAN	LFAVAPNQNLK	187;187	_LFAVAPNQNLK_.2	_LFAVAPNQNLK_	2.34345e+06	8860897	10426733
A0A384MDP3;P12110	A0A384MDP3;P12110	;COL6A2	A0A384MDP3_HUMAN;CO6A2_HUMAN	NLQGISSFR	121;121	_NLQGISSFR_.2	_NLQGISSFR_	2.28292e+06	332206	604551
A0A384MDP3;P12110	A0A384MDP3;P12110	;COL6A2	A0A384MDP3_HUMAN;CO6A2_HUMAN	NFVINVVNR	636;636	_NFVINVVNR_.2	_NFVINVVNR_	665312	252359	92505.5
A0A384MDP3;P12110	A0A384MDP3;P12110	;COL6A2	A0A384MDP3_HUMAN;CO6A2_HUMAN	VFAVVITDGR	725;725	_VFAVVITDGR_.2	_VFAVVITDGR_	2.95309	0	0
A0A384MDR3;P02792	A0A384MDR3;P02792	FTL	A0A384MDR3_HUMAN;FRIL_HUMAN	LGGPEAGLGEYLFER	155;155	_LGGPEAGLGEYLFER_.2	_LGGPEAGLGEYLFER_	467025	426819	436110
A0A384MDR3;P02792	A0A384MDR3;P02792	FTL	A0A384MDR3_HUMAN;FRIL_HUMAN	LGGPEAGLGEYLFER	155;155	_LGGPEAGLGEYLFER_.3	_LGGPEAGLGEYLFER_	467025	426819	436110
A0A384MQW4;A0A7I2V3T8;A0A7I2YQA5;A6QRJ1;B3KR70;Q15904	A0A384MQW4;A0A7I2V3T8;A0A7I2YQA5;A6QRJ1;B3KR70;Q15904	;ATP6AP1;ATP6AP1;ATP6AP1;;ATP6AP1	A0A384MQW4_HUMAN;A0A7I2V3T8_HUMAN;A0A7I2YQA5_HUMAN;A6QRJ1_HUMAN;B3KR70_HUMAN;VAS1_HUMAN	LGASPLHVDLATLR	152;152;152;152;112;152	_LGASPLHVDLATLR_.3	_LGASPLHVDLATLR_	3875.3	61749.4	1.25246
A0A384MQW4;A0A7I2V3T8;A0A7I2YQA5;A6QRJ1;B3KR70;Q15904	A0A384MQW4;A0A7I2V3T8;A0A7I2YQA5;A6QRJ1;B3KR70;Q15904	;ATP6AP1;ATP6AP1;ATP6AP1;;ATP6AP1	A0A384MQW4_HUMAN;A0A7I2V3T8_HUMAN;A0A7I2YQA5_HUMAN;A6QRJ1_HUMAN;B3KR70_HUMAN;VAS1_HUMAN	NVLLFLQDK	88;88;88;88;48;88	_NVLLFLQDK_.2	_NVLLFLQDK_	19060.3	0	7364.12
A0A384MR27;P09382	A0A384MR27;P09382	;LGALS1	A0A384MR27_HUMAN;LEG1_HUMAN	ACGLVASNLNLKPGECLR	2;2	_[Acetyl (Protein N-term)]AC[Carbamidomethyl (C)]GLVASNLNLKPGEC[Carbamidomethyl (C)]LR_.3	_[+42]AC[+57]GLVASNLNLKPGEC[+57]LR_	7614840	0	0
A0A384N669;P51884	A0A384N669;P51884	;LUM	A0A384N669_HUMAN;LUM_HUMAN	ILGPLSYSK	297;297	_ILGPLSYSK_.2	_ILGPLSYSK_	267730832	357676992	297659904
A0A384N669;P51884	A0A384N669;P51884	;LUM	A0A384N669_HUMAN;LUM_HUMAN	ILGPLSYSK	297;297	_ILGPLSYSK_.1	_ILGPLSYSK_	267730832	357676992	297659904
A0A384N669;P51884	A0A384N669;P51884	;LUM	A0A384N669_HUMAN;LUM_HUMAN	ISNIPDEYFK	217;217	_ISNIPDEYFK_.2	_ISNIPDEYFK_	468366944	468617440	420626112
A0A384N669;P51884	A0A384N669;P51884	;LUM	A0A384N669_HUMAN;LUM_HUMAN	SVPMVPPGIK	60;60	_SVPMVPPGIK_.2	_SVPMVPPGIK_	12623426	15184632	12362704
A0A384N669;P51884	A0A384N669;P51884	;LUM	A0A384N669_HUMAN;LUM_HUMAN	SVPMVPPGIK	60;60	_SVPM[Oxidation (M)]VPPGIK_.2	_SVPM[+16]VPPGIK_	12623426	15184632	12362704
A0A384N669;P51884	A0A384N669;P51884	;LUM	A0A384N669_HUMAN;LUM_HUMAN	LPSGLPVSLLTLYLDNNK	199;199	_LPSGLPVSLLTLYLDNNK_.2	_LPSGLPVSLLTLYLDNNK_	15212093	17161580	11501388
A0A384N669;P51884	A0A384N669;P51884	;LUM	A0A384N669_HUMAN;LUM_HUMAN	LPSGLPVSLLTLYLDNNK	199;199	_LPSGLPVSLLTLYLDNNK_.3	_LPSGLPVSLLTLYLDNNK_	15212093	17161580	11501388
A0A384N669;P51884	A0A384N669;P51884	;LUM	A0A384N669_HUMAN;LUM_HUMAN	ISNIPDEYFKR	217;217	_ISNIPDEYFKR_.3	_ISNIPDEYFKR_	12257958	2.50442e+06	13051012
A0A384N669;P51884	A0A384N669;P51884	;LUM	A0A384N669_HUMAN;LUM_HUMAN	ISNIPDEYFKR	217;217	_ISNIPDEYFKR_.2	_ISNIPDEYFKR_	12257958	2.50442e+06	13051012
A0A384N669;P51884	A0A384N669;P51884	;LUM	A0A384N669_HUMAN;LUM_HUMAN	RFNALQYLR	227;227	_RFNALQYLR_.2	_RFNALQYLR_	6.52624e+06	6742750	6969478
A0A384N669;P51884	A0A384N669;P51884	;LUM	A0A384N669_HUMAN;LUM_HUMAN	RFNALQYLR	227;227	_RFNALQYLR_.3	_RFNALQYLR_	6.52624e+06	6742750	6969478
A0A384N669;P51884	A0A384N669;P51884	;LUM	A0A384N669_HUMAN;LUM_HUMAN	FNALQYLR	228;228	_FNALQYLR_.2	_FNALQYLR_	1.56534e+06	870116	2.72582e+06
A0A384N669;P51884	A0A384N669;P51884	;LUM	A0A384N669_HUMAN;LUM_HUMAN	SLEDLQLTHNK	138;138	_SLEDLQLTHNK_.2	_SLEDLQLTHNK_	569867	785633	282263
A0A384N669;P51884	A0A384N669;P51884	;LUM	A0A384N669_HUMAN;LUM_HUMAN	SLEDLQLTHNK	138;138	_SLEDLQLTHNK_.3	_SLEDLQLTHNK_	569867	785633	282263
A0A384N669;P51884	A0A384N669;P51884	;LUM	A0A384N669_HUMAN;LUM_HUMAN	LKEDAVSAAFK	171;171	_LKEDAVSAAFK_.2	_LKEDAVSAAFK_	2278665	2.12462e+06	1.89737e+06
A0A384N669;P51884	A0A384N669;P51884	;LUM	A0A384N669_HUMAN;LUM_HUMAN	LKEDAVSAAFK	171;171	_LKEDAVSAAFK_.3	_LKEDAVSAAFK_	2278665	2.12462e+06	1.89737e+06
A0A384N669;P51884	A0A384N669;P51884	;LUM	A0A384N669_HUMAN;LUM_HUMAN	AFENVTDLQWLILDHNLLENSK	85;85	_AFENVTDLQWLILDHNLLENSK_.3	_AFENVTDLQWLILDHNLLENSK_	0	0	60400.8
A0A384N669;P51884	A0A384N669;P51884	;LUM	A0A384N669_HUMAN;LUM_HUMAN	SLEYLDLSFNQIAR	185;185	_SLEYLDLSFNQIAR_.2	_SLEYLDLSFNQIAR_	707886	623732	972247
A0A384N669;P51884	A0A384N669;P51884	;LUM	A0A384N669_HUMAN;LUM_HUMAN	SLEYLDLSFNQIAR	185;185	_SLEYLDLSFNQIAR_.3	_SLEYLDLSFNQIAR_	707886	623732	972247
A0A384N669;P51884	A0A384N669;P51884	;LUM	A0A384N669_HUMAN;LUM_HUMAN	NNQIDHIDEK	75;75	_NNQIDHIDEK_.2	_NNQIDHIDEK_	0	0	88966.6
A0A384N669;P51884	A0A384N669;P51884	;LUM	A0A384N669_HUMAN;LUM_HUMAN	NNQIDHIDEK	75;75	_NNQIDHIDEK_.3	_NNQIDHIDEK_	0	0	88966.6
A0A384NKM6;B4DPN0;D9IWP9;J3KS17;P02749	A0A384NKM6;B4DPN0;D9IWP9;J3KS17;P02749	APOH;;;APOH;APOH	A0A384NKM6_HUMAN;B4DPN0_HUMAN;D9IWP9_HUMAN;J3KS17_HUMAN;APOH_HUMAN	EHSSLAFWK	328;257;309;87;328	_EHSSLAFWK_.2	_EHSSLAFWK_	2670615	3565169	2.71531e+06
A0A384NKM6;B4DPN0;D9IWP9;J3KS17;P02749	A0A384NKM6;B4DPN0;D9IWP9;J3KS17;P02749	APOH;;;APOH;APOH	A0A384NKM6_HUMAN;B4DPN0_HUMAN;D9IWP9_HUMAN;J3KS17_HUMAN;APOH_HUMAN	EHSSLAFWK	328;257;309;87;328	_EHSSLAFWK_.3	_EHSSLAFWK_	2670615	3565169	2.71531e+06
A0A384NKM6;B4DPN0;D9IWP9;J3KS17;P02749	A0A384NKM6;B4DPN0;D9IWP9;J3KS17;P02749	APOH;;;APOH;APOH	A0A384NKM6_HUMAN;B4DPN0_HUMAN;D9IWP9_HUMAN;J3KS17_HUMAN;APOH_HUMAN	TDASDVKPC	337;266;318;96;337	_TDASDVKPC[Carbamidomethyl (C)]_.2	_TDASDVKPC[+57]_	320566	0	149559
A0A384NKS6;P10909	A0A384NKS6;P10909	;CLU	A0A384NKS6_HUMAN;CLUS_HUMAN	EILSVDCSTNNPSQAK	359;307	_EILSVDC[Carbamidomethyl (C)]STNNPSQAK_.2	_EILSVDC[+57]STNNPSQAK_	304846	939549	359469
A0A384NKS6;P10909	A0A384NKS6;P10909	;CLU	A0A384NKS6_HUMAN;CLUS_HUMAN	TLLSNLEEAK	121;69	_TLLSNLEEAK_.2	_TLLSNLEEAK_	922890	2.0202e+06	1492314
A0A384NKS6;P10909	A0A384NKS6;P10909	;CLU	A0A384NKS6_HUMAN;CLUS_HUMAN	VTTVASHTSDSDVPSGVTEVVVK	438;386	_VTTVASHTSDSDVPSGVTEVVVK_.3	_VTTVASHTSDSDVPSGVTEVVVK_	682301	801392	1.06317e+06
A0A384NKS6;P10909	A0A384NKS6;P10909	;CLU	A0A384NKS6_HUMAN;CLUS_HUMAN	ELDESLQVAER	378;326	_ELDESLQVAER_.2	_ELDESLQVAER_	658049	531948	97582.1
A0A384NKS6;P10909	A0A384NKS6;P10909	;CLU	A0A384NKS6_HUMAN;CLUS_HUMAN	ASSIIDELFQDR	235;183	_ASSIIDELFQDR_.2	_ASSIIDELFQDR_	701447	673158	895310
A0A384NKS6;P10909	A0A384NKS6;P10909	;CLU	A0A384NKS6_HUMAN;CLUS_HUMAN	LFDSDPITVTVPVEVSR	461;409	_LFDSDPITVTVPVEVSR_.2	_LFDSDPITVTVPVEVSR_	718177	985374	862990
A0A384NKS6;P10909	A0A384NKS6;P10909	;CLU	A0A384NKS6_HUMAN;CLUS_HUMAN	LFDSDPITVTVPVEVSR	461;409	_LFDSDPITVTVPVEVSR_.3	_LFDSDPITVTVPVEVSR_	718177	985374	862990
A0A384NKS6;P10909	A0A384NKS6;P10909	;CLU	A0A384NKS6_HUMAN;CLUS_HUMAN	IDSLLENDR	211;159	_IDSLLENDR_.2	_IDSLLENDR_	0	588377	105080
A0A384NKS6;P10909	A0A384NKS6;P10909	;CLU	A0A384NKS6_HUMAN;CLUS_HUMAN	RPHFFFPK	267;215	_RPHFFFPK_.3	_RPHFFFPK_	692820	718267	23739.8
A0A384NKS6;P10909	A0A384NKS6;P10909	;CLU	A0A384NKS6_HUMAN;CLUS_HUMAN	SGSGLVGR	183;131	_SGSGLVGR_.2	_SGSGLVGR_	559899	672561	493485
A0A384NKS6;P10909	A0A384NKS6;P10909	;CLU	A0A384NKS6_HUMAN;CLUS_HUMAN	EIQNAVNGVK	97;45	_EIQNAVNGVK_.2	_EIQNAVNGVK_	241714	86418.7	249245
A0A384NKS6;P10909	A0A384NKS6;P10909	;CLU	A0A384NKS6_HUMAN;CLUS_HUMAN	KYNELLK	392;340	_KYNELLK_.2	_KYNELLK_	1.73358e+06	0	5.73542e+06
A0A384NKS6;P10909	A0A384NKS6;P10909	;CLU	A0A384NKS6_HUMAN;CLUS_HUMAN	EPQDTYHYLPFSLPHR	251;199	_EPQDTYHYLPFSLPHR_.4	_EPQDTYHYLPFSLPHR_	2.57437	0	194372
A0A384NKS6;P10909	A0A384NKS6;P10909	;CLU	A0A384NKS6_HUMAN;CLUS_HUMAN	EPQDTYHYLPFSLPHR	251;199	_EPQDTYHYLPFSLPHR_.3	_EPQDTYHYLPFSLPHR_	2.57437	0	194372
A0A384NKS6;P10909	A0A384NKS6;P10909	;CLU	A0A384NKS6_HUMAN;CLUS_HUMAN	KTLLSNLEEAKK	120;68	_KTLLSNLEEAKK_.3	_KTLLSNLEEAKK_	0	0	394187
A0A384NKS6;P10909	A0A384NKS6;P10909	;CLU	A0A384NKS6_HUMAN;CLUS_HUMAN	KTLLSNLEEAKK	120;68	_KTLLSNLEEAKK_.2	_KTLLSNLEEAKK_	0	0	394187
A0A384NKS6;P10909	A0A384NKS6;P10909	;CLU	A0A384NKS6_HUMAN;CLUS_HUMAN	KTLLSNLEEAK	120;68	_KTLLSNLEEAK_.3	_KTLLSNLEEAK_	73874.6	179127	16821.9
A0A384NKS6;P10909	A0A384NKS6;P10909	;CLU	A0A384NKS6_HUMAN;CLUS_HUMAN	KTLLSNLEEAK	120;68	_KTLLSNLEEAK_.2	_KTLLSNLEEAK_	73874.6	179127	16821.9
A0A384NKS6;P10909	A0A384NKS6;P10909	;CLU	A0A384NKS6_HUMAN;CLUS_HUMAN	EGDDDRTVCR	329;277	_EGDDDRTVC[Carbamidomethyl (C)]R_.3	_EGDDDRTVC[+57]R_	0	0	35213.4
A0A384NKS6;P10909	A0A384NKS6;P10909	;CLU	A0A384NKS6_HUMAN;CLUS_HUMAN	EGDDDRTVCR	329;277	_EGDDDRTVC[Carbamidomethyl (C)]R_.2	_EGDDDRTVC[+57]R_	0	0	35213.4
A0A384NPH0;Q03252	A0A384NPH0;Q03252	;LMNB2	A0A384NPH0_HUMAN;LMNB2_HUMAN	GLESDVAELR	152;172	_GLESDVAELR_.2	_GLESDVAELR_	0	0	649366
A0A384P5H7;P12109	A0A384P5H7;P12109	COL6A1	A0A384P5H7_HUMAN;CO6A1_HUMAN	VAVVQYSGTGQQRPER	873;873	_VAVVQYSGTGQQRPER_.3	_VAVVQYSGTGQQRPER_	187885	144697	229766
A0A384P5H7;P12109	A0A384P5H7;P12109	COL6A1	A0A384P5H7_HUMAN;CO6A1_HUMAN	IALVITDGR	723;723	_IALVITDGR_.2	_IALVITDGR_	925957	0	964865
A0A384P5H7;P12109	A0A384P5H7;P12109	COL6A1	A0A384P5H7_HUMAN;CO6A1_HUMAN	VFSVAITPDHLEPR	186;186	_VFSVAITPDHLEPR_.3	_VFSVAITPDHLEPR_	211226	746904	1.12277e+06
A0A384P5H7;P12109	A0A384P5H7;P12109	COL6A1	A0A384P5H7_HUMAN;CO6A1_HUMAN	VFSVAITPDHLEPR	186;186	_VFSVAITPDHLEPR_.2	_VFSVAITPDHLEPR_	211226	746904	1.12277e+06
A0A384P5H7;P12109	A0A384P5H7;P12109	COL6A1	A0A384P5H7_HUMAN;CO6A1_HUMAN	VPSYQALLR	1006;1006	_VPSYQALLR_.2	_VPSYQALLR_	579124	772674	353314
A0A384P5H7;P12109	A0A384P5H7;P12109	COL6A1	A0A384P5H7_HUMAN;CO6A1_HUMAN	NNVEQVCCSFECQPAR	241;241	_NNVEQVC[Carbamidomethyl (C)]C[Carbamidomethyl (C)]SFEC[Carbamidomethyl (C)]QPAR_.2	_NNVEQVC[+57]C[+57]SFEC[+57]QPAR_	1	1	1
A0A384P5H7;P12109	A0A384P5H7;P12109	COL6A1	A0A384P5H7_HUMAN;CO6A1_HUMAN	NNVEQVCCSFECQPAR	241;241	_NNVEQVC[Carbamidomethyl (C)]C[Carbamidomethyl (C)]SFEC[Carbamidomethyl (C)]QPAR_.3	_NNVEQVC[+57]C[+57]SFEC[+57]QPAR_	1	1	1
A0A384P5H7;P12109	A0A384P5H7;P12109	COL6A1	A0A384P5H7_HUMAN;CO6A1_HUMAN	LSIIATDHTYR	200;200	_LSIIATDHTYR_.3	_LSIIATDHTYR_	128051	0	0
A0A384P5H7;P12109	A0A384P5H7;P12109	COL6A1	A0A384P5H7_HUMAN;CO6A1_HUMAN	LKPYGALVDK	52;52	_LKPYGALVDK_.3	_LKPYGALVDK_	207385	439144	361996
A0A384P5V3;M0R0C6;Q92945	A0A384P5V3;M0R0C6;Q92945	;KHSRP;KHSRP	A0A384P5V3_HUMAN;M0R0C6_HUMAN;FUBP2_HUMAN	GGGGPGGGGPGGGSAGGPSQPPGGGGPGIR	41;41;41	_GGGGPGGGGPGGGSAGGPSQPPGGGGPGIR_.3	_GGGGPGGGGPGGGSAGGPSQPPGGGGPGIR_	0	0	1.12707
A0A385KNS5;B4DN59;P16070	A0A385KNS5;B4DN59;P16070	CD44;;CD44	A0A385KNS5_HUMAN;B4DN59_HUMAN;CD44_HUMAN	YGFIEGHVVIPR	79;79;79	_YGFIEGHVVIPR_.3	_YGFIEGHVVIPR_	37976804	45430328	13279870
A0A385KNS5;B4DN59;P16070	A0A385KNS5;B4DN59;P16070	CD44;;CD44	A0A385KNS5_HUMAN;B4DN59_HUMAN;CD44_HUMAN	YGFIEGHVVIPR	79;79;79	_YGFIEGHVVIPR_.2	_YGFIEGHVVIPR_	37976804	45430328	13279870
A0A385KNS5;B4DN59;P16070	A0A385KNS5;B4DN59;P16070	CD44;;CD44	A0A385KNS5_HUMAN;B4DN59_HUMAN;CD44_HUMAN	TEAADLCK	47;47;47	_TEAADLC[Carbamidomethyl (C)]K_.2	_TEAADLC[+57]K_	1.4457e+06	4270696	3.1634e+06
A0A385KNS5;B4DN59;P16070	A0A385KNS5;B4DN59;P16070	CD44;;CD44	A0A385KNS5_HUMAN;B4DN59_HUMAN;CD44_HUMAN	TEAADLCK	47;47;47	_TEAADLC[Carbamidomethyl (C)]K_.1	_TEAADLC[+57]K_	1.4457e+06	4270696	3.1634e+06
A0A385KNS5;B4DN59;P16070	A0A385KNS5;B4DN59;P16070	CD44;;CD44	A0A385KNS5_HUMAN;B4DN59_HUMAN;CD44_HUMAN	ALSIGFETCR	69;69;69	_ALSIGFETC[Carbamidomethyl (C)]R_.2	_ALSIGFETC[+57]R_	29235230	28727138	30122282
A0A385KNS5;B4DN59;P16070	A0A385KNS5;B4DN59;P16070	CD44;;CD44	A0A385KNS5_HUMAN;B4DN59_HUMAN;CD44_HUMAN	FAGVFHVEK	30;30;30	_FAGVFHVEK_.2	_FAGVFHVEK_	42687.1	1	107140
A0A3B3IRL6;A0A8Q3WKU1;A0A8Q3WKU2;Q6UXH8	A0A3B3IRL6;A0A8Q3WKU1;A0A8Q3WKU2;Q6UXH8	CCBE1	A0A3B3IRL6_HUMAN;A0A8Q3WKU1_HUMAN;A0A8Q3WKU2_HUMAN;CCBE1_HUMAN	VLCTCYPGYR	109;109;109;109	_VLC[Carbamidomethyl (C)]TC[Carbamidomethyl (C)]YPGYR_.2	_VLC[+57]TC[+57]YPGYR_	85711.5	84672.8	17811.1
A0A3G1HEF1;P05543	A0A3G1HEF1;P05543	;SERPINA7	A0A3G1HEF1_HUMAN;THBG_HUMAN	VVNPTEA	409;409	_VVNPTEA_.1	_VVNPTEA_	6180232	2819272	25447166
A0A3G1HEF1;P05543	A0A3G1HEF1;P05543	;SERPINA7	A0A3G1HEF1_HUMAN;THBG_HUMAN	NALALFVLPK	264;264	_NALALFVLPK_.2	_NALALFVLPK_	933866	845343	979742
A0A494C018;P01133;Q6QBS2	A0A494C018;P01133;Q6QBS2	EGF	A0A494C018_HUMAN;EGF_HUMAN;Q6QBS2_HUMAN	YACNCVVGYIGER	876;999;29	_YAC[Carbamidomethyl (C)]NC[Carbamidomethyl (C)]VVGYIGER_.2	_YAC[+57]NC[+57]VVGYIGER_	0	0	1.72295e+06
A0A5C2G716	A0A5C2G716		A0A5C2G716_HUMAN	DESIRTYADSVK	54	_DESIRTYADSVK_.2	_DESIRTYADSVK_	13495911	0	0
A0A5F9UY30;O43493	A0A5F9UY30;O43493	TGOLN2	A0A5F9UY30_HUMAN;TGON2_HUMAN	SGAEEQGPIDGPSK	224;224	_SGAEEQGPIDGPSK_.2	_SGAEEQGPIDGPSK_	166393	0	0
A0A5K1VW97;H0YMF1;P16112;Q6PID9	A0A5K1VW97;H0YMF1;P16112;Q6PID9	ACAN	A0A5K1VW97_HUMAN;H0YMF1_HUMAN;PGCA_HUMAN;Q6PID9_HUMAN	YPIVTPR	634;634;634;634	_YPIVTPR_.2	_YPIVTPR_	1.51547e+06	1.65061e+06	596338
A0A5K1VW97;H0YMF1;P16112;Q6PID9	A0A5K1VW97;H0YMF1;P16112;Q6PID9	ACAN	A0A5K1VW97_HUMAN;H0YMF1_HUMAN;PGCA_HUMAN;Q6PID9_HUMAN	LEGEVFFATR	576;576;576;576	_LEGEVFFATR_.2	_LEGEVFFATR_	3.35033e+06	3.99846e+06	3.5388e+06
A0A5K1VW97;H0YMF1;P16112;Q6PID9	A0A5K1VW97;H0YMF1;P16112;Q6PID9	ACAN	A0A5K1VW97_HUMAN;H0YMF1_HUMAN;PGCA_HUMAN;Q6PID9_HUMAN	YPIVSPR	536;536;536;536	_YPIVSPR_.2	_YPIVSPR_	1123043	4271236	4871114
A0A5K1VW97;H0YMF1;P16112;Q6PID9	A0A5K1VW97;H0YMF1;P16112;Q6PID9	ACAN	A0A5K1VW97_HUMAN;H0YMF1_HUMAN;PGCA_HUMAN;Q6PID9_HUMAN	CYAGWLADGSLR	622;622;622;622	_C[Carbamidomethyl (C)]YAGWLADGSLR_.2	_C[+57]YAGWLADGSLR_	0	0	9544396
A0A5K1VW97;H0YMF1;P16112;Q6PID9	A0A5K1VW97;H0YMF1;P16112;Q6PID9	ACAN	A0A5K1VW97_HUMAN;H0YMF1_HUMAN;PGCA_HUMAN;Q6PID9_HUMAN	TPCVGDKDSSPGVR	543;543;543;543	_TPC[Carbamidomethyl (C)]VGDKDSSPGVR_.3	_TPC[+57]VGDKDSSPGVR_	169773	414642	309730
A0A650AXN9;Q03692	A0A650AXN9;Q03692	COL10A1	A0A650AXN9_HUMAN;COAA1_HUMAN	AYPAIGTPIPFDK	561;561	_AYPAIGTPIPFDK_.2	_AYPAIGTPIPFDK_	5.71429e+06	1.92043e+06	8667450
A0A7I2V2F9;E7EUI6;H7C4K3;P05556	A0A7I2V2F9;E7EUI6;H7C4K3;P05556	ITGB1	A0A7I2V2F9_HUMAN;E7EUI6_HUMAN;H7C4K3_HUMAN;ITB1_HUMAN	FCECDNFNCDR	548;555;495;552	_FC[Carbamidomethyl (C)]EC[Carbamidomethyl (C)]DNFNC[Carbamidomethyl (C)]DR_.2	_FC[+57]EC[+57]DNFNC[+57]DR_	103927	445052	31171.4
A0A7I2V2F9;E7EUI6;H7C4K3;P05556	A0A7I2V2F9;E7EUI6;H7C4K3;P05556	ITGB1	A0A7I2V2F9_HUMAN;E7EUI6_HUMAN;H7C4K3_HUMAN;ITB1_HUMAN	SGEPQTFTLK	121;128;68;125	_SGEPQTFTLK_.2	_SGEPQTFTLK_	0	3422027	1.48025e+06
A0A7I2V2F9;E7EUI6;H7C4K3;P05556	A0A7I2V2F9;E7EUI6;H7C4K3;P05556	ITGB1	A0A7I2V2F9_HUMAN;E7EUI6_HUMAN;H7C4K3_HUMAN;ITB1_HUMAN	SAVTTVVNPK	781;788;728;785	_SAVTTVVNPK_.2	_SAVTTVVNPK_	728540	133133	79622
A0A7I2V2F9;E7EUI6;H7C4K3;P05556	A0A7I2V2F9;E7EUI6;H7C4K3;P05556	ITGB1	A0A7I2V2F9_HUMAN;E7EUI6_HUMAN;H7C4K3_HUMAN;ITB1_HUMAN	LKPEDITQIQPQQLVLR	102;109;49;106	_LKPEDITQIQPQQLVLR_.3	_LKPEDITQIQPQQLVLR_	4.86573e+06	863943	751484
A0A7I2V2F9;E7EUI6;H7C4K3;P05556	A0A7I2V2F9;E7EUI6;H7C4K3;P05556	ITGB1	A0A7I2V2F9_HUMAN;E7EUI6_HUMAN;H7C4K3_HUMAN;ITB1_HUMAN	LSEGVTISYK	385;392;332;389	_LSEGVTISYK_.2	_LSEGVTISYK_	159861	189184	72634
A0A7I2V2F9;E7EUI6;H7C4K3;P05556	A0A7I2V2F9;E7EUI6;H7C4K3;P05556	ITGB1	A0A7I2V2F9_HUMAN;E7EUI6_HUMAN;H7C4K3_HUMAN;ITB1_HUMAN	DKLPQPVQPDPVSHCK	673;680;620;677	_DKLPQPVQPDPVSHC[Carbamidomethyl (C)]K_.3	_DKLPQPVQPDPVSHC[+57]K_	0	0	8338.2
A0A7I2V2F9;E7EUI6;H7C4K3;P05556	A0A7I2V2F9;E7EUI6;H7C4K3;P05556	ITGB1	A0A7I2V2F9_HUMAN;E7EUI6_HUMAN;H7C4K3_HUMAN;ITB1_HUMAN	NVLSLTNK	217;224;164;221	_NVLSLTNK_.2	_NVLSLTNK_	369415	0	129879
A0A7I2V2F9;E7EUI6;H7C4K3;P05556	A0A7I2V2F9;E7EUI6;H7C4K3;P05556	ITGB1	A0A7I2V2F9_HUMAN;E7EUI6_HUMAN;H7C4K3_HUMAN;ITB1_HUMAN	NVLSLTNK	217;224;164;221	_NVLSLTNK_.1	_NVLSLTNK_	369415	0	129879
A0A7I2V2F9;E7EUI6;H7C4K3;P05556	A0A7I2V2F9;E7EUI6;H7C4K3;P05556	ITGB1	A0A7I2V2F9_HUMAN;E7EUI6_HUMAN;H7C4K3_HUMAN;ITB1_HUMAN	LLVFSTDAGFHFAGDGK	269;276;216;273	_LLVFSTDAGFHFAGDGK_.3	_LLVFSTDAGFHFAGDGK_	464178	656491	289214
A0A7I2V2F9;E7EUI6;H7C4K3;P05556	A0A7I2V2F9;E7EUI6;H7C4K3;P05556	ITGB1	A0A7I2V2F9_HUMAN;E7EUI6_HUMAN;H7C4K3_HUMAN;ITB1_HUMAN	LLVFSTDAGFHFAGDGK	269;276;216;273	_LLVFSTDAGFHFAGDGK_.2	_LLVFSTDAGFHFAGDGK_	464178	656491	289214
A0A7I2V2F9;E7EUI6;H7C4K3;P05556	A0A7I2V2F9;E7EUI6;H7C4K3;P05556	ITGB1	A0A7I2V2F9_HUMAN;E7EUI6_HUMAN;H7C4K3_HUMAN;ITB1_HUMAN	RITSDFR	171;178;118;175	_RITSDFR_.2	_RITSDFR_	0	193464	130682
A0A7I2V2F9;E7EUI6;H7C4K3;P05556	A0A7I2V2F9;E7EUI6;H7C4K3;P05556	ITGB1	A0A7I2V2F9_HUMAN;E7EUI6_HUMAN;H7C4K3_HUMAN;ITB1_HUMAN	LSENNIQTIFAVTEEFQPVYK	322;329;269;326	_LSENNIQTIFAVTEEFQPVYK_.3	_LSENNIQTIFAVTEEFQPVYK_	0	0	74030.9
A0A7I2V2F9;E7EUI6;H7C4K3;P05556	A0A7I2V2F9;E7EUI6;H7C4K3;P05556	ITGB1	A0A7I2V2F9_HUMAN;E7EUI6_HUMAN;H7C4K3_HUMAN;ITB1_HUMAN	WDTGENPIYK	771;778;718;775	_WDTGENPIYK_.2	_WDTGENPIYK_	0	176157	0
A0A7I2V3W3;A0A7I2V4B3;A0A7I2YQ97;Q13443	A0A7I2V3W3;A0A7I2V4B3;A0A7I2YQ97;Q13443	ADAM9	A0A7I2V3W3_HUMAN;A0A7I2V4B3_HUMAN;A0A7I2YQ97_HUMAN;ADAM9_HUMAN	DLLPEDFVVYTYNK	86;86;86;86	_DLLPEDFVVYTYNK_.2	_DLLPEDFVVYTYNK_	0	76248.9	264078
A0A7I2V3W3;A0A7I2V4B3;A0A7I2YQ97;Q13443	A0A7I2V3W3;A0A7I2V4B3;A0A7I2YQ97;Q13443	ADAM9	A0A7I2V3W3_HUMAN;A0A7I2V4B3_HUMAN;A0A7I2YQ97_HUMAN;ADAM9_HUMAN	QVSYVIQAEGK	65;65;65;65	_QVSYVIQAEGK_.2	_QVSYVIQAEGK_	1.62195e+06	1643920	1.19568e+06
A0A7I2V3W3;A0A7I2V4B3;A0A7I2YQ97;Q13443	A0A7I2V3W3;A0A7I2V4B3;A0A7I2YQ97;Q13443	ADAM9	A0A7I2V3W3_HUMAN;A0A7I2V4B3_HUMAN;A0A7I2YQ97_HUMAN;ADAM9_HUMAN	EGTLITDHPNIQNHCHYR	100;100;100;100	_EGTLITDHPNIQNHC[Carbamidomethyl (C)]HYR_.5	_EGTLITDHPNIQNHC[+57]HYR_	358682	0	0
A0A7I2V3W3;A0A7I2V4B3;A0A7I2YQ97;Q13443	A0A7I2V3W3;A0A7I2V4B3;A0A7I2YQ97;Q13443	ADAM9	A0A7I2V3W3_HUMAN;A0A7I2V4B3_HUMAN;A0A7I2YQ97_HUMAN;ADAM9_HUMAN	NKDLLPEDFVVYTYNK	84;84;84;84	_NKDLLPEDFVVYTYNK_.3	_NKDLLPEDFVVYTYNK_	0	4331257	1.99642e+06
A0A7I2V3W3;A0A7I2V4B3;A0A7I2YQ97;Q13443	A0A7I2V3W3;A0A7I2V4B3;A0A7I2YQ97;Q13443	ADAM9	A0A7I2V3W3_HUMAN;A0A7I2V4B3_HUMAN;A0A7I2YQ97_HUMAN;ADAM9_HUMAN	NKDLLPEDFVVYTYNK	84;84;84;84	_NKDLLPEDFVVYTYNK_.2	_NKDLLPEDFVVYTYNK_	0	4331257	1.99642e+06
A0A7I2V3W3;A0A7I2V4B3;A0A7I2YQ97;Q13443	A0A7I2V3W3;A0A7I2V4B3;A0A7I2YQ97;Q13443	ADAM9	A0A7I2V3W3_HUMAN;A0A7I2V4B3_HUMAN;A0A7I2YQ97_HUMAN;ADAM9_HUMAN	EAPRPYSK	57;57;57;57	_EAPRPYSK_.2	_EAPRPYSK_	389185	730000	244928
A0A7I2V3W3;A0A7I2V4B3;A0A7I2YQ97;Q13443	A0A7I2V3W3;A0A7I2V4B3;A0A7I2YQ97;Q13443	ADAM9	A0A7I2V3W3_HUMAN;A0A7I2V4B3_HUMAN;A0A7I2YQ97_HUMAN;ADAM9_HUMAN	EHIIHLER	76;76;76;76	_EHIIHLER_.2	_EHIIHLER_	417395	236752	1.67162e+06
A0A7I2V3W3;A0A7I2V4B3;A0A7I2YQ97;Q13443	A0A7I2V3W3;A0A7I2V4B3;A0A7I2YQ97;Q13443	ADAM9	A0A7I2V3W3_HUMAN;A0A7I2V4B3_HUMAN;A0A7I2YQ97_HUMAN;ADAM9_HUMAN	MDDVYKEPLK	165;165;165;165	_MDDVYKEPLK_.3	_MDDVYKEPLK_	32472.2	0	32505
A0A7I2V3W3;A0A7I2V4B3;A0A7I2YQ97;Q13443	A0A7I2V3W3;A0A7I2V4B3;A0A7I2YQ97;Q13443	ADAM9	A0A7I2V3W3_HUMAN;A0A7I2V4B3_HUMAN;A0A7I2YQ97_HUMAN;ADAM9_HUMAN	MDDVYKEPLK	165;165;165;165	_MDDVYKEPLK_.2	_MDDVYKEPLK_	32472.2	0	32505
A0A7P0SNB0;D0PNI2;P28300;Q96PQ9	A0A7P0SNB0;D0PNI2;P28300;Q96PQ9	LOX	A0A7P0SNB0_HUMAN;D0PNI2_HUMAN;LYOX_HUMAN;Q96PQ9_HUMAN	TPILLIR	89;89;89;89	_TPILLIR_.2	_TPILLIR_	2.3328e+06	3.34469e+06	3.17652e+06
A0A7P0SNB0;D0PNI2;P28300;Q96PQ9	A0A7P0SNB0;D0PNI2;P28300;Q96PQ9	LOX	A0A7P0SNB0_HUMAN;D0PNI2_HUMAN;LYOX_HUMAN;Q96PQ9_HUMAN	DPGAAVPGAANASAQQPR	71;71;71;71	_DPGAAVPGAANASAQQPR_.2	_DPGAAVPGAANASAQQPR_	1.18729	0	1
A0A7P0T937;A0A7P0TAE9;A0A7P0TB65;P27824	A0A7P0T937;A0A7P0TAE9;A0A7P0TB65;P27824	CANX	A0A7P0T937_HUMAN;A0A7P0TAE9_HUMAN;A0A7P0TB65_HUMAN;CALX_HUMAN	GTLSGWILSK	78;78;78;78	_GTLSGWILSK_.2	_GTLSGWILSK_	0	285184	678890
A0A804HL01;E7ENY0;E7EV99;P35611	A0A804HL01;E7ENY0;E7EV99;P35611	ADD1	A0A804HL01_HUMAN;E7ENY0_HUMAN;E7EV99_HUMAN;ADDA_HUMAN	EYQPHVIVSTTGPNPFTTLTDR	611;580;549;549	_EYQPHVIVSTTGPNPFTTLTDR_.3	_EYQPHVIVSTTGPNPFTTLTDR_	685800	0	0
A1YVW6;A2A2V1;B2R5Q9;B4DJ65;D4P3Q7;O75942;P04156;Q53YK7;Q6FGN5;Q6FGR8;Q6SES1;Q86XR1	A1YVW6;A2A2V1;B2R5Q9;B4DJ65;D4P3Q7;O75942;P04156;Q53YK7;Q6FGN5;Q6FGR8;Q6SES1;Q86XR1	PRNP;PRNP;;;PRNP;PRNP;PRNP;PRNP;PRNP;PRNP;PRNP;PRNP	A1YVW6_HUMAN;A2A2V1_HUMAN;B2R5Q9_HUMAN;B4DJ65_HUMAN;D4P3Q7_HUMAN;O75942_HUMAN;PRIO_HUMAN;Q53YK7_HUMAN;Q6FGN5_HUMAN;Q6FGR8_HUMAN;Q6SES1_HUMAN;Q86XR1_HUMAN	VVEQMCITQYER	209;209;209;185;202;241;209;209;209;209;233;194	_VVEQMC[Carbamidomethyl (C)]ITQYER_.2	_VVEQMC[+57]ITQYER_	0	4.72118	2.54944
A2RTY6;D3DRR6;P19823;Q5T985	A2RTY6;D3DRR6;P19823;Q5T985	ITIH2	A2RTY6_HUMAN;D3DRR6_HUMAN;ITIH2_HUMAN;Q5T985_HUMAN	IQPSGGTNINEALLR	380;380;380;369	_IQPSGGTNINEALLR_.2	_IQPSGGTNINEALLR_	22780232	27310000	29575518
A2RTY6;D3DRR6;P19823;Q5T985	A2RTY6;D3DRR6;P19823;Q5T985	ITIH2	A2RTY6_HUMAN;D3DRR6_HUMAN;ITIH2_HUMAN;Q5T985_HUMAN	FYNQVSTPLLR	489;491;489;478	_FYNQVSTPLLR_.2	_FYNQVSTPLLR_	8399247	14233534	9516229
A2RTY6;D3DRR6;P19823;Q5T985	A2RTY6;D3DRR6;P19823;Q5T985	ITIH2	A2RTY6_HUMAN;D3DRR6_HUMAN;ITIH2_HUMAN;Q5T985_HUMAN	VQSTITSR	77;77;77;66	_VQSTITSR_.2	_VQSTITSR_	4852582	5.2569e+06	4.79263e+06
A2RTY6;D3DRR6;P19823;Q5T985	A2RTY6;D3DRR6;P19823;Q5T985	ITIH2	A2RTY6_HUMAN;D3DRR6_HUMAN;ITIH2_HUMAN;Q5T985_HUMAN	VQFELHYQEVK	177;177;177;166	_VQFELHYQEVK_.3	_VQFELHYQEVK_	4595704	4678791	4113614
A2RTY6;D3DRR6;P19823;Q5T985	A2RTY6;D3DRR6;P19823;Q5T985	ITIH2	A2RTY6_HUMAN;D3DRR6_HUMAN;ITIH2_HUMAN;Q5T985_HUMAN	VQFELHYQEVK	177;177;177;166	_VQFELHYQEVK_.2	_VQFELHYQEVK_	4595704	4678791	4113614
A2RTY6;D3DRR6;P19823;Q5T985	A2RTY6;D3DRR6;P19823;Q5T985	ITIH2	A2RTY6_HUMAN;D3DRR6_HUMAN;ITIH2_HUMAN;Q5T985_HUMAN	KLWAYLTINQLLAER	582;584;582;571	_KLWAYLTINQLLAER_.3	_KLWAYLTINQLLAER_	831876	111534	524224
A2RTY6;D3DRR6;P19823;Q5T985	A2RTY6;D3DRR6;P19823;Q5T985	ITIH2	A2RTY6_HUMAN;D3DRR6_HUMAN;ITIH2_HUMAN;Q5T985_HUMAN	KLWAYLTINQLLAER	582;584;582;571	_KLWAYLTINQLLAER_.2	_KLWAYLTINQLLAER_	831876	111534	524224
A2RTY6;D3DRR6;P19823;Q5T985	A2RTY6;D3DRR6;P19823;Q5T985	ITIH2	A2RTY6_HUMAN;D3DRR6_HUMAN;ITIH2_HUMAN;Q5T985_HUMAN	LWAYLTINQLLAER	583;585;583;572	_LWAYLTINQLLAER_.2	_LWAYLTINQLLAER_	139032	255952	128948
A2RTY6;D3DRR6;P19823;Q5T985	A2RTY6;D3DRR6;P19823;Q5T985	ITIH2	A2RTY6_HUMAN;D3DRR6_HUMAN;ITIH2_HUMAN;Q5T985_HUMAN	LWAYLTINQLLAER	583;585;583;572	_LWAYLTINQLLAER_.3	_LWAYLTINQLLAER_	139032	255952	128948
A2RTY6;D3DRR6;P19823;Q5T985	A2RTY6;D3DRR6;P19823;Q5T985	ITIH2	A2RTY6_HUMAN;D3DRR6_HUMAN;ITIH2_HUMAN;Q5T985_HUMAN	KFYNQVSTPLLR	488;490;488;477	_KFYNQVSTPLLR_.3	_KFYNQVSTPLLR_	497646	0	998062
A2RTY6;D3DRR6;P19823;Q5T985	A2RTY6;D3DRR6;P19823;Q5T985	ITIH2	A2RTY6_HUMAN;D3DRR6_HUMAN;ITIH2_HUMAN;Q5T985_HUMAN	KFYNQVSTPLLR	488;490;488;477	_KFYNQVSTPLLR_.2	_KFYNQVSTPLLR_	497646	0	998062
A2VCK8;P62328	A2VCK8;P62328	TMSB4X	A2VCK8_HUMAN;TYB4_HUMAN	NPLPSKETIEQEK	27;27	_NPLPSKETIEQEK_.3	_NPLPSKETIEQEK_	8516251	5.12665e+06	6424729
A2VCK8;P62328	A2VCK8;P62328	TMSB4X	A2VCK8_HUMAN;TYB4_HUMAN	NPLPSKETIEQEK	27;27	_NPLPSKETIEQEK_.2	_NPLPSKETIEQEK_	8516251	5.12665e+06	6424729
A2VCK8;P62328	A2VCK8;P62328	TMSB4X	A2VCK8_HUMAN;TYB4_HUMAN	ETIEQEKQAGES	33;33	_ETIEQEKQAGES_.2	_ETIEQEKQAGES_	1186919	1.67624e+06	1.01761e+06
A2VCK8;P62328	A2VCK8;P62328	TMSB4X	A2VCK8_HUMAN;TYB4_HUMAN	SDKPDMAEIEKFDK	2;2	_[Acetyl (Protein N-term)]SDKPDMAEIEKFDK_.3	_[+42]SDKPDMAEIEKFDK_	4862418	7525526	7874130
A2VCK8;P62328	A2VCK8;P62328	TMSB4X	A2VCK8_HUMAN;TYB4_HUMAN	SDKPDMAEIEKFDK	2;2	_[Acetyl (Protein N-term)]SDKPDM[Oxidation (M)]AEIEKFDK_.3	_[+42]SDKPDM[+16]AEIEKFDK_	4862418	7525526	7874130
A2VCK8;P62328	A2VCK8;P62328	TMSB4X	A2VCK8_HUMAN;TYB4_HUMAN	SDKPDMAEIEKFDK	2;2	_[Acetyl (Protein N-term)]SDKPDM[Oxidation (M)]AEIEKFDK_.2	_[+42]SDKPDM[+16]AEIEKFDK_	4862418	7525526	7874130
A2VCK8;P62328	A2VCK8;P62328	TMSB4X	A2VCK8_HUMAN;TYB4_HUMAN	SDKPDMAEIEKFDK	2;2	_[Acetyl (Protein N-term)]SDKPDMAEIEKFDK_.2	_[+42]SDKPDMAEIEKFDK_	4862418	7525526	7874130
A2VCK8;P62328	A2VCK8;P62328	TMSB4X	A2VCK8_HUMAN;TYB4_HUMAN	TETQEKNPLPSK	21;21	_TETQEKNPLPSK_.3	_TETQEKNPLPSK_	955456	1.96261e+06	4367449
A2VCK8;P62328	A2VCK8;P62328	TMSB4X	A2VCK8_HUMAN;TYB4_HUMAN	TETQEKNPLPSK	21;21	_TETQEKNPLPSK_.2	_TETQEKNPLPSK_	955456	1.96261e+06	4367449
A2VCK8;P62328	A2VCK8;P62328	TMSB4X	A2VCK8_HUMAN;TYB4_HUMAN	TETQEKNPLPSKETIEQEK	21;21	_TETQEKNPLPSKETIEQEK_.4	_TETQEKNPLPSKETIEQEK_	3.30794e+06	2041749	3801681
A2VCK8;P62328	A2VCK8;P62328	TMSB4X	A2VCK8_HUMAN;TYB4_HUMAN	TETQEKNPLPSKETIEQEK	21;21	_TETQEKNPLPSKETIEQEK_.3	_TETQEKNPLPSKETIEQEK_	3.30794e+06	2041749	3801681
A2VCK8;P62328	A2VCK8;P62328	TMSB4X	A2VCK8_HUMAN;TYB4_HUMAN	KTETQEKNPLPSK	20;20	_KTETQEKNPLPSK_.3	_KTETQEKNPLPSK_	4614200	2.20374e+06	2.91761e+06
A2VCK8;P62328	A2VCK8;P62328	TMSB4X	A2VCK8_HUMAN;TYB4_HUMAN	SDKPDMAEIEK	2;2	_[Acetyl (Protein N-term)]SDKPDMAEIEK_.2	_[+42]SDKPDMAEIEK_	1.77849e+06	1.02444e+06	3.48086e+06
A2VCK8;P62328	A2VCK8;P62328	TMSB4X	A2VCK8_HUMAN;TYB4_HUMAN	SDKPDMAEIEK	2;2	_[Acetyl (Protein N-term)]SDKPDM[Oxidation (M)]AEIEK_.2	_[+42]SDKPDM[+16]AEIEK_	1.77849e+06	1.02444e+06	3.48086e+06
A2VCK8;P62328	A2VCK8;P62328	TMSB4X	A2VCK8_HUMAN;TYB4_HUMAN	SDKPDMAEIEK	2;2	_SDKPDMAEIEK_.3	_SDKPDMAEIEK_	1.77849e+06	1.02444e+06	3.48086e+06
A3KPE2;B0YIW2;P02656	A3KPE2;B0YIW2;P02656	APOC3	A3KPE2_HUMAN;B0YIW2_HUMAN;APOC3_HUMAN	DALSSVQESQVAQQAR	45;63;45	_DALSSVQESQVAQQAR_.2	_DALSSVQESQVAQQAR_	3.43848e+06	5.42826e+06	3.21394e+06
A3KPE2;B0YIW2;P02656	A3KPE2;B0YIW2;P02656	APOC3	A3KPE2_HUMAN;B0YIW2_HUMAN;APOC3_HUMAN	DALSSVQESQVAQQAR	45;63;45	_DALSSVQESQVAQQAR_.3	_DALSSVQESQVAQQAR_	3.43848e+06	5.42826e+06	3.21394e+06
A3R0T8;B2R984;P10412;Q4VB24	A3R0T8;B2R984;P10412;Q4VB24	HIST1H1E;;H1-4;HIST1H1E	A3R0T8_HUMAN;B2R984_HUMAN;H14_HUMAN;Q4VB24_HUMAN	ALAAAGYDVEK	65;65;65;65	_ALAAAGYDVEK_.2	_ALAAAGYDVEK_	0	0	168825
A4GW21;Q2LC89;Q9BQ51	A4GW21;Q2LC89;Q9BQ51	;PDL2;PDCD1LG2	A4GW21_HUMAN;Q2LC89_HUMAN;PD1L2_HUMAN	ATLLEEQLPLGK	73;62;73	_ATLLEEQLPLGK_.2	_ATLLEEQLPLGK_	206543	0	0
A6H8L4;A8K1B4;B2RNB2;P78536;Q6P5T8	A6H8L4;A8K1B4;B2RNB2;P78536;Q6P5T8	ADAM17;;ADAM17;ADAM17;ADAM17	A6H8L4_HUMAN;A8K1B4_HUMAN;B2RNB2_HUMAN;ADA17_HUMAN;Q6P5T8_HUMAN	LYLTSSTER	81;81;81;81;81	_LYLTSSTER_.2	_LYLTSSTER_	0	0	107776
A6NLG9;A8K7E0;B3KS75;B4DDQ2;P21810;Q53FI4;Q53HU6	A6NLG9;A8K7E0;B3KS75;B4DDQ2;P21810;Q53FI4;Q53HU6	;;;;BGN;;	A6NLG9_HUMAN;A8K7E0_HUMAN;B3KS75_HUMAN;B4DDQ2_HUMAN;PGS1_HUMAN;Q53FI4_HUMAN;Q53HU6_HUMAN	GLQHLYALVLVNNK	51;112;88;78;112;112;112	_GLQHLYALVLVNNK_.3	_GLQHLYALVLVNNK_	0	0	1.60995
A6XGL1;A6XMH1;E9KL36;P02766	A6XGL1;A6XMH1;E9KL36;P02766	;;TTR;TTR	A6XGL1_HUMAN;A6XMH1_HUMAN;E9KL36_HUMAN;TTHY_HUMAN	VEIDTKSYWK	91,128;91;91;91	_VEIDTKSYWK_.3	_VEIDTKSYWK_	435761	1.30629e+06	92534.1
A6XGL1;A6XMH1;E9KL36;P02766	A6XGL1;A6XMH1;E9KL36;P02766	;;TTR;TTR	A6XGL1_HUMAN;A6XMH1_HUMAN;E9KL36_HUMAN;TTHY_HUMAN	VEIDTKSYWK	91,128;91;91;91	_VEIDTKSYWK_.2	_VEIDTKSYWK_	435761	1.30629e+06	92534.1
A6XGL2;F6MZK5;I3WAC9;P01308	A6XGL2;F6MZK5;I3WAC9;P01308	INS	A6XGL2_HUMAN;F6MZK5_HUMAN;I3WAC9_HUMAN;INS_HUMAN	GFFYTPK	47;31;47;47	_GFFYTPK_.2	_GFFYTPK_	101557968	145715808	132859536
A6XGL2;F6MZK5;I3WAC9;P01308	A6XGL2;F6MZK5;I3WAC9;P01308	INS	A6XGL2_HUMAN;F6MZK5_HUMAN;I3WAC9_HUMAN;INS_HUMAN	GFFYTPK	47;31;47;47	_GFFYTPK_.1	_GFFYTPK_	101557968	145715808	132859536
A6XGL2;F6MZK5;I3WAC9;P01308	A6XGL2;F6MZK5;I3WAC9;P01308	INS	A6XGL2_HUMAN;F6MZK5_HUMAN;I3WAC9_HUMAN;INS_HUMAN	GIVEQCCTSICSLYQLENYCN	78;74;90;90	_GIVEQC[Carbamidomethyl (C)]C[Carbamidomethyl (C)]TSIC[Carbamidomethyl (C)]SLYQLENYC[Carbamidomethyl (C)]N_.3	_GIVEQC[+57]C[+57]TSIC[+57]SLYQLENYC[+57]N_	830514	1.10396e+06	988734
A8K061;Q9Y5C1	A8K061;Q9Y5C1	;ANGPTL3	A8K061_HUMAN;ANGL3_HUMAN	LDGEFWLGLEK	309;309	_LDGEFWLGLEK_.2	_LDGEFWLGLEK_	148028	186895	153848
A8K061;Q9Y5C1	A8K061;Q9Y5C1	;ANGPTL3	A8K061_HUMAN;ANGL3_HUMAN	GQINDIFQK	66;66	_GQINDIFQK_.2	_GQINDIFQK_	0	654498	702841
A8K061;Q9Y5C1	A8K061;Q9Y5C1	;ANGPTL3	A8K061_HUMAN;ANGL3_HUMAN	LESLLEEK	124;124	_LESLLEEK_.2	_LESLLEEK_	312322	0	0
A8K0R3;B4DI63;P20774;Q7Z532	A8K0R3;B4DI63;P20774;Q7Z532	OGN;;OGN;	A8K0R3_HUMAN;B4DI63_HUMAN;MIME_HUMAN;Q7Z532_HUMAN	DFADIPNLR	138;196;138;138	_DFADIPNLR_.2	_DFADIPNLR_	4.8147e+06	4038252	3913303
A8K0R3;B4DI63;P20774;Q7Z532	A8K0R3;B4DI63;P20774;Q7Z532	OGN;;OGN;	A8K0R3_HUMAN;B4DI63_HUMAN;MIME_HUMAN;Q7Z532_HUMAN	LEGNPIVLGK	272;330;272;272	_LEGNPIVLGK_.2	_LEGNPIVLGK_	3.55301e+06	809583	3.09591e+06
A8K0R3;B4DI63;P20774;Q7Z532	A8K0R3;B4DI63;P20774;Q7Z532	OGN;;OGN;	A8K0R3_HUMAN;B4DI63_HUMAN;MIME_HUMAN;Q7Z532_HUMAN	LTLFNAK	189;247;189;189	_LTLFNAK_.2	_LTLFNAK_	1.59589e+06	3.14604e+06	3.64742e+06
A8K4R1;Q6P4E1	A8K4R1;Q6P4E1	;GOLM2	A8K4R1_HUMAN;GOLM2_HUMAN	EQLAELR	128;128	_EQLAELR_.2	_EQLAELR_	424930	0	703181
A8K674;B2RDW1;B4DV12;F5GXK7;F5GYU3;F5H265;F5H2Z3;F5H388;F5H6Q2;F5H747;J3QKN0;J3QS39;J3QTR3;L8B196;L8B4I8;L8B4J3;L8B4M0;L8B4R0;L8B4Z6;P0CG47;P0CG48;P62979;P62987;Q3MIH3;Q59EM9;Q5PY61;Q5RKT7;Q5U5U6;Q5UGI3;Q66K58;Q96C32;Q96H31;Q96MH4;Q9UFQ0	A8K674;B2RDW1;B4DV12;F5GXK7;F5GYU3;F5H265;F5H2Z3;F5H388;F5H6Q2;F5H747;J3QKN0;J3QS39;J3QTR3;L8B196;L8B4I8;L8B4J3;L8B4M0;L8B4R0;L8B4Z6;P0CG47;P0CG48;P62979;P62987;Q3MIH3;Q59EM9;Q5PY61;Q5RKT7;Q5U5U6;Q5UGI3;Q66K58;Q96C32;Q96H31;Q96MH4;Q9UFQ0	;HEL112;UBB;UBC;UBC;UBC;UBC;UBC;UBC;UBC;UBB;UBB;RPS27A;UbC;UbC;UbC;UbC;UbC;UbC;UBB;UBC;RPS27A;UBA52;UBA52;;UBC;RPS27A;UBB;UBC;;UBC;UBC;;DKFZp434K0435	A8K674_HUMAN;B2RDW1_HUMAN;B4DV12_HUMAN;F5GXK7_HUMAN;F5GYU3_HUMAN;F5H265_HUMAN;F5H2Z3_HUMAN;F5H388_HUMAN;F5H6Q2_HUMAN;F5H747_HUMAN;J3QKN0_HUMAN;J3QS39_HUMAN;J3QTR3_HUMAN;L8B196_HUMAN;L8B4I8_HUMAN;L8B4J3_HUMAN;L8B4M0_HUMAN;L8B4R0_HUMAN;L8B4Z6_HUMAN;UBB_HUMAN;UBC_HUMAN;RS27A_HUMAN;RL40_HUMAN;Q3MIH3_HUMAN;Q59EM9_HUMAN;Q5PY61_HUMAN;Q5RKT7_HUMAN;Q5U5U6_HUMAN;Q5UGI3_HUMAN;Q66K58_HUMAN;Q96C32_HUMAN;Q96H3…	ESTLHLVLR	64,140,216,292,368,444,520,596;64;64,140;64,140;64;64,140;64;64,140;64;64,140;64,140;64;64;64,140,216,292,368,444,520;64,140,216,292,368,444,520;64,140,216,292,368,444,520,596,672;64,140,216,292,368,444,520,596,672;64,140,216,292,368,444,520,596;64,140,216,292,368,444,520,596,672;64,140,216;64,140,216,292,368,444,520,596,672;64;64;64;80,156,232,308,384,460,536,612,688,764,840,916,992,1068,1144,12…	_ESTLHLVLR_.3	_ESTLHLVLR_	662915	291418	478617
A8K674;B2RDW1;B4DV12;F5GXK7;F5GYU3;F5H265;F5H2Z3;F5H388;F5H6Q2;F5H747;J3QKN0;J3QS39;J3QTR3;L8B196;L8B4I8;L8B4J3;L8B4M0;L8B4R0;L8B4Z6;P0CG47;P0CG48;P62979;P62987;Q3MIH3;Q59EM9;Q5PY61;Q5RKT7;Q5U5U6;Q5UGI3;Q66K58;Q96C32;Q96H31;Q96MH4;Q9UFQ0	A8K674;B2RDW1;B4DV12;F5GXK7;F5GYU3;F5H265;F5H2Z3;F5H388;F5H6Q2;F5H747;J3QKN0;J3QS39;J3QTR3;L8B196;L8B4I8;L8B4J3;L8B4M0;L8B4R0;L8B4Z6;P0CG47;P0CG48;P62979;P62987;Q3MIH3;Q59EM9;Q5PY61;Q5RKT7;Q5U5U6;Q5UGI3;Q66K58;Q96C32;Q96H31;Q96MH4;Q9UFQ0	;HEL112;UBB;UBC;UBC;UBC;UBC;UBC;UBC;UBC;UBB;UBB;RPS27A;UbC;UbC;UbC;UbC;UbC;UbC;UBB;UBC;RPS27A;UBA52;UBA52;;UBC;RPS27A;UBB;UBC;;UBC;UBC;;DKFZp434K0435	A8K674_HUMAN;B2RDW1_HUMAN;B4DV12_HUMAN;F5GXK7_HUMAN;F5GYU3_HUMAN;F5H265_HUMAN;F5H2Z3_HUMAN;F5H388_HUMAN;F5H6Q2_HUMAN;F5H747_HUMAN;J3QKN0_HUMAN;J3QS39_HUMAN;J3QTR3_HUMAN;L8B196_HUMAN;L8B4I8_HUMAN;L8B4J3_HUMAN;L8B4M0_HUMAN;L8B4R0_HUMAN;L8B4Z6_HUMAN;UBB_HUMAN;UBC_HUMAN;RS27A_HUMAN;RL40_HUMAN;Q3MIH3_HUMAN;Q59EM9_HUMAN;Q5PY61_HUMAN;Q5RKT7_HUMAN;Q5U5U6_HUMAN;Q5UGI3_HUMAN;Q66K58_HUMAN;Q96C32_HUMAN;Q96H3…	ESTLHLVLR	64,140,216,292,368,444,520,596;64;64,140;64,140;64;64,140;64;64,140;64;64,140;64,140;64;64;64,140,216,292,368,444,520;64,140,216,292,368,444,520;64,140,216,292,368,444,520,596,672;64,140,216,292,368,444,520,596,672;64,140,216,292,368,444,520,596;64,140,216,292,368,444,520,596,672;64,140,216;64,140,216,292,368,444,520,596,672;64;64;64;80,156,232,308,384,460,536,612,688,764,840,916,992,1068,1144,12…	_ESTLHLVLR_.2	_ESTLHLVLR_	662915	291418	478617
A8K6K4;C9J1D9;Q9NPH3	A8K6K4;C9J1D9;Q9NPH3	;IL1RAP;IL1RAP	A8K6K4_HUMAN;C9J1D9_HUMAN;IL1AP_HUMAN	VAFPLEVVQK	125;125;125	_VAFPLEVVQK_.2	_VAFPLEVVQK_	1.03622e+06	972256	2.94642e+06
A8K6K4;C9J1D9;Q9NPH3	A8K6K4;C9J1D9;Q9NPH3	;IL1RAP;IL1RAP	A8K6K4_HUMAN;C9J1D9_HUMAN;IL1AP_HUMAN	QDRDLEEPINFR	75;75;75	_QDRDLEEPINFR_.3	_QDRDLEEPINFR_	2.38304e+06	678159	2.6098e+06
A8K6K4;C9J1D9;Q9NPH3	A8K6K4;C9J1D9;Q9NPH3	;IL1RAP;IL1RAP	A8K6K4_HUMAN;C9J1D9_HUMAN;IL1AP_HUMAN	DLEEPINFR	78;78;78	_DLEEPINFR_.2	_DLEEPINFR_	1.30235e+06	1.23758e+06	633118
A8K7J3;Q15075	A8K7J3;Q15075	;EEA1	A8K7J3_HUMAN;EEA1_HUMAN	TELLQRPGIEDVAVLK	212;212	_TELLQRPGIEDVAVLK_.3	_TELLQRPGIEDVAVLK_	0	0	1.00092e+06
A8K7Q1;Q02818	A8K7Q1;Q02818	;NUCB1	A8K7Q1_HUMAN;NUCB1_HUMAN	LSQETEALGR	368;368	_LSQETEALGR_.2	_LSQETEALGR_	1.42396e+06	900488	5.83402e+06
A8K7Q1;Q02818	A8K7Q1;Q02818	;NUCB1	A8K7Q1_HUMAN;NUCB1_HUMAN	LQAANAEDIK	72;72	_LQAANAEDIK_.2	_LQAANAEDIK_	913992	507730	3087510
A8K7Q1;Q02818	A8K7Q1;Q02818	;NUCB1	A8K7Q1_HUMAN;NUCB1_HUMAN	DLELLIQTATR	153;153	_DLELLIQTATR_.2	_DLELLIQTATR_	596679	628902	642121
A8K7Q1;Q02818	A8K7Q1;Q02818	;NUCB1	A8K7Q1_HUMAN;NUCB1_HUMAN	LVTLEEFLASTQR	311;311	_LVTLEEFLASTQR_.2	_LVTLEEFLASTQR_	225662	121633	350134
A8K7Q1;Q02818	A8K7Q1;Q02818	;NUCB1	A8K7Q1_HUMAN;NUCB1_HUMAN	LVTLEEFLASTQR	311;311	_LVTLEEFLASTQR_.3	_LVTLEEFLASTQR_	225662	121633	350134
A8K7Q1;Q02818	A8K7Q1;Q02818	;NUCB1	A8K7Q1_HUMAN;NUCB1_HUMAN	VNVPGSQAQLK	219;219	_VNVPGSQAQLK_.2	_VNVPGSQAQLK_	861535	2.62312e+06	572315
A8K7Q1;Q02818	A8K7Q1;Q02818	;NUCB1	A8K7Q1_HUMAN;NUCB1_HUMAN	EVWEELDGLDPNR	230;230	_EVWEELDGLDPNR_.2	_EVWEELDGLDPNR_	188264	1	0
A8K7Q1;Q02818	A8K7Q1;Q02818	;NUCB1	A8K7Q1_HUMAN;NUCB1_HUMAN	RFEEELAAR	349;349	_RFEEELAAR_.2	_RFEEELAAR_	3.17562e+06	2.53048e+06	2785811
A8K7Q1;Q02818	A8K7Q1;Q02818	;NUCB1	A8K7Q1_HUMAN;NUCB1_HUMAN	YLESLGEEQRK	190;190	_YLESLGEEQRK_.3	_YLESLGEEQRK_	188822	0	251203
A8K7Q1;Q02818	A8K7Q1;Q02818	;NUCB1	A8K7Q1_HUMAN;NUCB1_HUMAN	YLESLGEEQRK	190;190	_YLESLGEEQRK_.2	_YLESLGEEQRK_	188822	0	251203
A8K7Q1;Q02818	A8K7Q1;Q02818	;NUCB1	A8K7Q1_HUMAN;NUCB1_HUMAN	LPEVEVPQHL	452;452	_LPEVEVPQHL_.2	_LPEVEVPQHL_	287866	557485	0
A8K7Q1;Q02818	A8K7Q1;Q02818	;NUCB1	A8K7Q1_HUMAN;NUCB1_HUMAN	YLQEVIDVLETDGHFR	54;54	_YLQEVIDVLETDGHFR_.3	_YLQEVIDVLETDGHFR_	36510.5	7297.28	28177.6
A8K7Q1;Q02818	A8K7Q1;Q02818	;NUCB1	A8K7Q1_HUMAN;NUCB1_HUMAN	YLQEVIDVLETDGHFR	54;54	_YLQEVIDVLETDGHFR_.2	_YLQEVIDVLETDGHFR_	36510.5	7297.28	28177.6
A8K7Q1;Q02818	A8K7Q1;Q02818	;NUCB1	A8K7Q1_HUMAN;NUCB1_HUMAN	DLAQYDAAHHEEFKR	164;164	_DLAQYDAAHHEEFKR_.4	_DLAQYDAAHHEEFKR_	0	0	260955
A8K7Q1;Q02818	A8K7Q1;Q02818	;NUCB1	A8K7Q1_HUMAN;NUCB1_HUMAN	DLAQYDAAHHEEFKR	164;164	_DLAQYDAAHHEEFKR_.3	_DLAQYDAAHHEEFKR_	0	0	260955
A8K7Q1;Q02818	A8K7Q1;Q02818	;NUCB1	A8K7Q1_HUMAN;NUCB1_HUMAN	TFFILHDINSDGVLDEQELEALFTK	247;247	_TFFILHDINSDGVLDEQELEALFTK_.3	_TFFILHDINSDGVLDEQELEALFTK_	0	0	40742.6
A8K9L8;G5EA42;H0YMA2;Q4G0W6;Q9NZR1	A8K9L8;G5EA42;H0YMA2;Q4G0W6;Q9NZR1	;TMOD2;TMOD2;TMOD2;TMOD2	A8K9L8_HUMAN;G5EA42_HUMAN;H0YMA2_HUMAN;Q4G0W6_HUMAN;TMOD2_HUMAN	VAAAITK	330;286;89;286;330	_VAAAITK_.1	_VAAAITK_	695727	1906057	1538630
B0YJA4;E9PIM6;E9PNQ8;P04216;Q59GA0	B0YJA4;E9PIM6;E9PNQ8;P04216;Q59GA0	THY1;THY1;THY1;THY1;	B0YJA4_HUMAN;E9PIM6_HUMAN;E9PNQ8_HUMAN;THY1_HUMAN;Q59GA0_HUMAN	VTSLTACLVDQSLR	22;22;22;22;38	_VTSLTAC[Carbamidomethyl (C)]LVDQSLR_.2	_VTSLTAC[+57]LVDQSLR_	0	114762	448614
B0YJA4;E9PIM6;E9PNQ8;P04216;Q59GA0	B0YJA4;E9PIM6;E9PNQ8;P04216;Q59GA0	THY1;THY1;THY1;THY1;	B0YJA4_HUMAN;E9PIM6_HUMAN;E9PNQ8_HUMAN;THY1_HUMAN;Q59GA0_HUMAN	VTSLTACLVDQSLR	22;22;22;22;38	_VTSLTAC[Carbamidomethyl (C)]LVDQSLR_.3	_VTSLTAC[+57]LVDQSLR_	0	114762	448614
B2R7N9;Q99983	B2R7N9;Q99983	;OMD	B2R7N9_HUMAN;OMD_HUMAN	QAFYIPR	294;294	_QAFYIPR_.2	_QAFYIPR_	10098448	13869054	10894453
B2R7N9;Q99983	B2R7N9;Q99983	;OMD	B2R7N9_HUMAN;OMD_HUMAN	EINLSHNK	119;119	_EINLSHNK_.2	_EINLSHNK_	2.83962e+06	3610580	2.5682e+06
B2R8R5;Q13263	B2R8R5;Q13263	;TRIM28	B2R8R5_HUMAN;TIF1B_HUMAN	AASAAAASAAAASAASGSPGPGEGSAGGEK	2;2	_[Acetyl (Protein N-term)]AASAAAASAAAASAASGSPGPGEGSAGGEK_.3	_[+42]AASAAAASAAAASAASGSPGPGEGSAGGEK_	7.19577	0	5.68506
B2R950;F5GXY0;P20742	B2R950;F5GXY0;P20742	;PZP;PZP	B2R950_HUMAN;F5GXY0_HUMAN;PZP_HUMAN	DLFHCVSFTLPR	81;81;81	_DLFHC[Carbamidomethyl (C)]VSFTLPR_.3	_DLFHC[+57]VSFTLPR_	287609	340195	147564
B2R950;F5GXY0;P20742	B2R950;F5GXY0;P20742	;PZP;PZP	B2R950_HUMAN;F5GXY0_HUMAN;PZP_HUMAN	DLFHCVSFTLPR	81;81;81	_DLFHC[Carbamidomethyl (C)]VSFTLPR_.2	_DLFHC[+57]VSFTLPR_	287609	340195	147564
B2RAN2;O95497	B2RAN2;O95497	;VNN1	B2RAN2_HUMAN;VNN1_HUMAN	LFSLKPTSGPVLTVTLFGR	460;460	_LFSLKPTSGPVLTVTLFGR_.3	_LFSLKPTSGPVLTVTLFGR_	13084556	5.44475e+06	18150066
B2RAN2;O95497	B2RAN2;O95497	;VNN1	B2RAN2_HUMAN;VNN1_HUMAN	DLCCHLSYK	360;360	_DLC[Carbamidomethyl (C)]C[Carbamidomethyl (C)]HLSYK_.2	_DLC[+57]C[+57]HLSYK_	767148	4899132	1.21532e+06
B2RAN2;O95497	B2RAN2;O95497	;VNN1	B2RAN2_HUMAN;VNN1_HUMAN	DLCCHLSYK	360;360	_DLC[Carbamidomethyl (C)]C[Carbamidomethyl (C)]HLSYK_.3	_DLC[+57]C[+57]HLSYK_	767148	4899132	1.21532e+06
B2RDW0;B4DJ51;P0DP23;P0DP24;P0DP25	B2RDW0;B4DJ51;P0DP23;P0DP24;P0DP25	;HEL-S-72;CALM1;CALM2;CALM3	B2RDW0_HUMAN;B4DJ51_HUMAN;CALM1_HUMAN;CALM2_HUMAN;CALM3_HUMAN	DTDSEEEIREAFR	79;79;79;79;79	_DTDSEEEIREAFR_.3	_DTDSEEEIREAFR_	18167480	6288142	16565332
B2RDW0;B4DJ51;P0DP23;P0DP24;P0DP25	B2RDW0;B4DJ51;P0DP23;P0DP24;P0DP25	;HEL-S-72;CALM1;CALM2;CALM3	B2RDW0_HUMAN;B4DJ51_HUMAN;CALM1_HUMAN;CALM2_HUMAN;CALM3_HUMAN	DTDSEEEIREAFR	79;79;79;79;79	_DTDSEEEIREAFR_.2	_DTDSEEEIREAFR_	18167480	6288142	16565332
B2RDW0;B4DJ51;P0DP23;P0DP24;P0DP25	B2RDW0;B4DJ51;P0DP23;P0DP24;P0DP25	;HEL-S-72;CALM1;CALM2;CALM3	B2RDW0_HUMAN;B4DJ51_HUMAN;CALM1_HUMAN;CALM2_HUMAN;CALM3_HUMAN	VFDKDGNGYISAAELR	92;92;92;92;92	_VFDKDGNGYISAAELR_.3	_VFDKDGNGYISAAELR_	3.28062e+06	4.27534e+06	3746426
B2RDW0;B4DJ51;P0DP23;P0DP24;P0DP25	B2RDW0;B4DJ51;P0DP23;P0DP24;P0DP25	;HEL-S-72;CALM1;CALM2;CALM3	B2RDW0_HUMAN;B4DJ51_HUMAN;CALM1_HUMAN;CALM2_HUMAN;CALM3_HUMAN	VFDKDGNGYISAAELR	92;92;92;92;92	_VFDKDGNGYISAAELR_.2	_VFDKDGNGYISAAELR_	3.28062e+06	4.27534e+06	3746426
B2RDW0;B4DJ51;P0DP23;P0DP24;P0DP25	B2RDW0;B4DJ51;P0DP23;P0DP24;P0DP25	;HEL-S-72;CALM1;CALM2;CALM3	B2RDW0_HUMAN;B4DJ51_HUMAN;CALM1_HUMAN;CALM2_HUMAN;CALM3_HUMAN	DTDSEEEIR	79;79;79;79;79	_DTDSEEEIR_.2	_DTDSEEEIR_	45723.5	0	34970.1
B2RDW0;B4DJ51;P0DP23;P0DP24;P0DP25	B2RDW0;B4DJ51;P0DP23;P0DP24;P0DP25	;HEL-S-72;CALM1;CALM2;CALM3	B2RDW0_HUMAN;B4DJ51_HUMAN;CALM1_HUMAN;CALM2_HUMAN;CALM3_HUMAN	EAFSLFDKDGDGTITTK	15;15;15;15;15	_EAFSLFDKDGDGTITTK_.3	_EAFSLFDKDGDGTITTK_	12325565	16577061	8974804
B2RDW0;B4DJ51;P0DP23;P0DP24;P0DP25	B2RDW0;B4DJ51;P0DP23;P0DP24;P0DP25	;HEL-S-72;CALM1;CALM2;CALM3	B2RDW0_HUMAN;B4DJ51_HUMAN;CALM1_HUMAN;CALM2_HUMAN;CALM3_HUMAN	EAFSLFDKDGDGTITTK	15;15;15;15;15	_EAFSLFDKDGDGTITTK_.2	_EAFSLFDKDGDGTITTK_	12325565	16577061	8974804
B2RDW0;B4DJ51;P0DP23;P0DP24;P0DP25	B2RDW0;B4DJ51;P0DP23;P0DP24;P0DP25	;HEL-S-72;CALM1;CALM2;CALM3	B2RDW0_HUMAN;B4DJ51_HUMAN;CALM1_HUMAN;CALM2_HUMAN;CALM3_HUMAN	ADQLTEEQIAEFK	2;2;2;2;2	_[Acetyl (Protein N-term)]ADQLTEEQIAEFK_.2	_[+42]ADQLTEEQIAEFK_	30248836	11955724	28800768
B2RDW0;B4DJ51;P0DP23;P0DP24;P0DP25	B2RDW0;B4DJ51;P0DP23;P0DP24;P0DP25	;HEL-S-72;CALM1;CALM2;CALM3	B2RDW0_HUMAN;B4DJ51_HUMAN;CALM1_HUMAN;CALM2_HUMAN;CALM3_HUMAN	ADQLTEEQIAEFK	2;2;2;2;2	_ADQLTEEQIAEFK_.2	_ADQLTEEQIAEFK_	30248836	11955724	28800768
B2RDW0;B4DJ51;P0DP23;P0DP24;P0DP25	B2RDW0;B4DJ51;P0DP23;P0DP24;P0DP25	;HEL-S-72;CALM1;CALM2;CALM3	B2RDW0_HUMAN;B4DJ51_HUMAN;CALM1_HUMAN;CALM2_HUMAN;CALM3_HUMAN	EAFSLFDK	15;15;15;15;15	_EAFSLFDK_.2	_EAFSLFDK_	1.04541e+06	883438	0
B2RDW0;B4DJ51;P0DP23;P0DP24;P0DP25	B2RDW0;B4DJ51;P0DP23;P0DP24;P0DP25	;HEL-S-72;CALM1;CALM2;CALM3	B2RDW0_HUMAN;B4DJ51_HUMAN;CALM1_HUMAN;CALM2_HUMAN;CALM3_HUMAN	EAFSLFDK	15;15;15;15;15	_EAFSLFDK_.1	_EAFSLFDK_	1.04541e+06	883438	0
B2RDW0;B4DJ51;P0DP23;P0DP24;P0DP25	B2RDW0;B4DJ51;P0DP23;P0DP24;P0DP25	;HEL-S-72;CALM1;CALM2;CALM3	B2RDW0_HUMAN;B4DJ51_HUMAN;CALM1_HUMAN;CALM2_HUMAN;CALM3_HUMAN	EADIDGDGQVNYEEFVQMMTAK	128;128;128;128;128	_EADIDGDGQVNYEEFVQM[Oxidation (M)]MTAK_.3	_EADIDGDGQVNYEEFVQM[+16]MTAK_	0	0	112589
B2RDW0;B4DJ51;P0DP23;P0DP24;P0DP25	B2RDW0;B4DJ51;P0DP23;P0DP24;P0DP25	;HEL-S-72;CALM1;CALM2;CALM3	B2RDW0_HUMAN;B4DJ51_HUMAN;CALM1_HUMAN;CALM2_HUMAN;CALM3_HUMAN	EADIDGDGQVNYEEFVQMMTAK	128;128;128;128;128	_EADIDGDGQVNYEEFVQMMTAK_.3	_EADIDGDGQVNYEEFVQMMTAK_	0	0	112589
B2RDW0;B4DJ51;P0DP23;P0DP24;P0DP25	B2RDW0;B4DJ51;P0DP23;P0DP24;P0DP25	;HEL-S-72;CALM1;CALM2;CALM3	B2RDW0_HUMAN;B4DJ51_HUMAN;CALM1_HUMAN;CALM2_HUMAN;CALM3_HUMAN	EADIDGDGQVNYEEFVQMMTAK	128;128;128;128;128	_EADIDGDGQVNYEEFVQMM[Oxidation (M)]TAK_.3	_EADIDGDGQVNYEEFVQMM[+16]TAK_	0	0	112589
B2RDW0;B4DJ51;P0DP23;P0DP24;P0DP25	B2RDW0;B4DJ51;P0DP23;P0DP24;P0DP25	;HEL-S-72;CALM1;CALM2;CALM3	B2RDW0_HUMAN;B4DJ51_HUMAN;CALM1_HUMAN;CALM2_HUMAN;CALM3_HUMAN	EADIDGDGQVNYEEFVQMMTAK	128;128;128;128;128	_EADIDGDGQVNYEEFVQM[Oxidation (M)]M[Oxidation (M)]TAK_.3	_EADIDGDGQVNYEEFVQM[+16]M[+16]TAK_	0	0	112589
B3KNK9;Q8NBJ4	B3KNK9;Q8NBJ4	HEL46;GOLM1	B3KNK9_HUMAN;GOLM1_HUMAN	KNEFQGELEK	67;67	_KNEFQGELEK_.2	_KNEFQGELEK_	3.76314e+06	2.78111e+06	11537116
B3KNK9;Q8NBJ4	B3KNK9;Q8NBJ4	HEL46;GOLM1	B3KNK9_HUMAN;GOLM1_HUMAN	LQQDVLQFQK	134;134	_LQQDVLQFQK_.2	_LQQDVLQFQK_	12209978	16760393	13628219
B3KNK9;Q8NBJ4	B3KNK9;Q8NBJ4	HEL46;GOLM1	B3KNK9_HUMAN;GOLM1_HUMAN	NEFQGELEK	68;68	_NEFQGELEK_.2	_NEFQGELEK_	1423527	5.79653e+06	1.67977e+06
B3KNK9;Q8NBJ4	B3KNK9;Q8NBJ4	HEL46;GOLM1	B3KNK9_HUMAN;GOLM1_HUMAN	DTINLLDQR	386;386	_DTINLLDQR_.2	_DTINLLDQR_	4208587	3.68808e+06	4.32367e+06
B3KNK9;Q8NBJ4	B3KNK9;Q8NBJ4	HEL46;GOLM1	B3KNK9_HUMAN;GOLM1_HUMAN	EQVVEDRPVGGR	277;277	_EQVVEDRPVGGR_.3	_EQVVEDRPVGGR_	251590	136982	25447
B3KNK9;Q8NBJ4	B3KNK9;Q8NBJ4	HEL46;GOLM1	B3KNK9_HUMAN;GOLM1_HUMAN	EQVVEDRPVGGR	277;277	_EQVVEDRPVGGR_.2	_EQVVEDRPVGGR_	251590	136982	25447
B3KNK9;Q8NBJ4	B3KNK9;Q8NBJ4	HEL46;GOLM1	B3KNK9_HUMAN;GOLM1_HUMAN	VLQDQLK	119;119	_VLQDQLK_.2	_VLQDQLK_	0	252786	0
B3KNK9;Q8NBJ4	B3KNK9;Q8NBJ4	HEL46;GOLM1	B3KNK9_HUMAN;GOLM1_HUMAN	NIDVFNVEDQKR	374;374	_NIDVFNVEDQKR_.3	_NIDVFNVEDQKR_	1.11189e+06	1.2744e+06	1.69949e+06
B3KNK9;Q8NBJ4	B3KNK9;Q8NBJ4	HEL46;GOLM1	B3KNK9_HUMAN;GOLM1_HUMAN	NIDVFNVEDQKR	374;374	_NIDVFNVEDQKR_.2	_NIDVFNVEDQKR_	1.11189e+06	1.2744e+06	1.69949e+06
B3KNK9;Q8NBJ4	B3KNK9;Q8NBJ4	HEL46;GOLM1	B3KNK9_HUMAN;GOLM1_HUMAN	QQLQALSEPQPR	198;198	_QQLQALSEPQPR_.2	_QQLQALSEPQPR_	411207	486405	0
B3KNK9;Q8NBJ4	B3KNK9;Q8NBJ4	HEL46;GOLM1	B3KNK9_HUMAN;GOLM1_HUMAN	DRLPQEPGR	268;268	_DRLPQEPGR_.3	_DRLPQEPGR_	0	288584	0
B3KNK9;Q8NBJ4	B3KNK9;Q8NBJ4	HEL46;GOLM1	B3KNK9_HUMAN;GOLM1_HUMAN	DRLPQEPGR	268;268	_DRLPQEPGR_.2	_DRLPQEPGR_	0	288584	0
B3KNK9;Q8NBJ4	B3KNK9;Q8NBJ4	HEL46;GOLM1	B3KNK9_HUMAN;GOLM1_HUMAN	LPQEPGREQVVEDRPVGGR	270;270	_LPQEPGREQVVEDRPVGGR_.4	_LPQEPGREQVVEDRPVGGR_	968843	355943	392818
B3KNK9;Q8NBJ4	B3KNK9;Q8NBJ4	HEL46;GOLM1	B3KNK9_HUMAN;GOLM1_HUMAN	LPQEPGREQVVEDRPVGGR	270;270	_LPQEPGREQVVEDRPVGGR_.3	_LPQEPGREQVVEDRPVGGR_	968843	355943	392818
B3KPS3;B3KT06;P68363	B3KPS3;B3KT06;P68363	;;TUBA1B	B3KPS3_HUMAN;B3KT06_HUMAN;TBA1B_HUMAN	LISQIVSSITASLR	195;195;230	_LISQIVSSITASLR_.2	_LISQIVSSITASLR_	1	1	95493.9
B3KQF5;O43852;Q6IAW5	B3KQF5;O43852;Q6IAW5	;CALU;CALU	B3KQF5_HUMAN;CALU_HUMAN;Q6IAW5_HUMAN	WIYEDVER	104;104;104	_WIYEDVER_.2	_WIYEDVER_	565291	178139	0
B3KQF5;O43852;Q6IAW5	B3KQF5;O43852;Q6IAW5	;CALU;CALU	B3KQF5_HUMAN;CALU_HUMAN;Q6IAW5_HUMAN	IDGDKDGFVTVDELKDWIK	80;80;80	_IDGDKDGFVTVDELKDWIK_.3	_IDGDKDGFVTVDELKDWIK_	0	0	49674
B3KQF5;O43852;Q6IAW5	B3KQF5;O43852;Q6IAW5	;CALU;CALU	B3KQF5_HUMAN;CALU_HUMAN;Q6IAW5_HUMAN	IDGDKDGFVTVDELKDWIK	80;80;80	_IDGDKDGFVTVDELKDWIK_.4	_IDGDKDGFVTVDELKDWIK_	0	0	49674
B3KQF5;O43852;Q6IAW5	B3KQF5;O43852;Q6IAW5	;CALU;CALU	B3KQF5_HUMAN;CALU_HUMAN;Q6IAW5_HUMAN	YDLFVGSQATDFGEALVR	294;294;294	_YDLFVGSQATDFGEALVR_.2	_YDLFVGSQATDFGEALVR_	0	0	202242
B3KQF5;O43852;Q6IAW5	B3KQF5;O43852;Q6IAW5	;CALU;CALU	B3KQF5_HUMAN;CALU_HUMAN;Q6IAW5_HUMAN	YDLFVGSQATDFGEALVR	294;294;294	_YDLFVGSQATDFGEALVR_.3	_YDLFVGSQATDFGEALVR_	0	0	202242
B3KUI0;B4DTS6;B4E336;P48960	B3KUI0;B4DTS6;B4E336;P48960	;;;ADGRE5	B3KUI0_HUMAN;B4DTS6_HUMAN;B4E336_HUMAN;AGRE5_HUMAN	QELLCAFWK	363;442;311;491	_QELLC[Carbamidomethyl (C)]AFWK_.2	_QELLC[+57]AFWK_	177145	55123.4	77816.4
B4DM33;Q15691	B4DM33;Q15691	;MAPRE1	B4DM33_HUMAN;MARE1_HUMAN	NIELICQENEGENDPVLQR	193;223	_NIELIC[Carbamidomethyl (C)]QENEGENDPVLQR_.3	_NIELIC[+57]QENEGENDPVLQR_	0	0	548221
B4DMW9;B4DMX4;J3KMX3;P02771	B4DMW9;B4DMX4;J3KMX3;P02771	;;AFP;AFP	B4DMW9_HUMAN;B4DMX4_HUMAN;J3KMX3_HUMAN;FETA_HUMAN	GYQELLEK	248;218;376;376	_GYQELLEK_.2	_GYQELLEK_	227620	629334	122782
B4DMW9;B4DMX4;J3KMX3;P02771	B4DMW9;B4DMX4;J3KMX3;P02771	;;AFP;AFP	B4DMW9_HUMAN;B4DMX4_HUMAN;J3KMX3_HUMAN;FETA_HUMAN	LGEYYLQNAFLVAYTK	294;264;422;422	_LGEYYLQNAFLVAYTK_.2	_LGEYYLQNAFLVAYTK_	0	0	476849
B4DNS6;B4DV72;B4E397;B7ZB68;Q14515;Q8N4S1	B4DNS6;B4DV72;B4E397;B7ZB68;Q14515;Q8N4S1	;;;;SPARCL1;SPARCL1	B4DNS6_HUMAN;B4DV72_HUMAN;B4E397_HUMAN;B7ZB68_HUMAN;SPRL1_HUMAN;Q8N4S1_HUMAN	VLTHSELAPLR	462;509;433;482;607;607	_VLTHSELAPLR_.3	_VLTHSELAPLR_	511545	1.32353e+06	245545
B4DNS6;B4DV72;B4E397;B7ZB68;Q14515;Q8N4S1	B4DNS6;B4DV72;B4E397;B7ZB68;Q14515;Q8N4S1	;;;;SPARCL1;SPARCL1	B4DNS6_HUMAN;B4DV72_HUMAN;B4E397_HUMAN;B7ZB68_HUMAN;SPRL1_HUMAN;Q8N4S1_HUMAN	VLTHSELAPLR	462;509;433;482;607;607	_VLTHSELAPLR_.2	_VLTHSELAPLR_	511545	1.32353e+06	245545
B4DPP8;B4E1C2;D3DNU8;P01042;Q05CF8	B4DPP8;B4E1C2;D3DNU8;P01042;Q05CF8	;KNG1;KNG1;KNG1;KNG1	B4DPP8_HUMAN;B4E1C2_HUMAN;D3DNU8_HUMAN;KNG1_HUMAN;Q05CF8_HUMAN	RPPGFSPFR	369;381;381;381;245	_RPPGFSPFR_.2	_RPPGFSPFR_	25265980	49326432	13608344
B4DPP8;B4E1C2;D3DNU8;P01042;Q05CF8	B4DPP8;B4E1C2;D3DNU8;P01042;Q05CF8	;KNG1;KNG1;KNG1;KNG1	B4DPP8_HUMAN;B4E1C2_HUMAN;D3DNU8_HUMAN;KNG1_HUMAN;Q05CF8_HUMAN	RPPGFSPFR	369;381;381;381;245	_RPPGFSPFR_.3	_RPPGFSPFR_	25265980	49326432	13608344
B4DQB2;E9PL76;E9PQ75;E9PRD9;J3KQ55;J3KQQ7;J3QT03;O95498	B4DQB2;E9PL76;E9PQ75;E9PRD9;J3KQ55;J3KQQ7;J3QT03;O95498	VNN2	B4DQB2_HUMAN;E9PL76_HUMAN;E9PQ75_HUMAN;E9PRD9_HUMAN;J3KQ55_HUMAN;J3KQQ7_HUMAN;J3QT03_HUMAN;VNN2_HUMAN	DNSIYVLANLGDKK	131;131;78;78;131;131;131;131	_DNSIYVLANLGDKK_.2	_DNSIYVLANLGDKK_	31033194	23882928	24793582
B4DUN9;D3DQ79;H7BXY5;Q0ZGT2	B4DUN9;D3DQ79;H7BXY5;Q0ZGT2	;NEXN;NEXN;NEXN	B4DUN9_HUMAN;D3DQ79_HUMAN;H7BXY5_HUMAN;NEXN_HUMAN	QEFEQLR	392;342;306;406	_QEFEQLR_.2	_QEFEQLR_	0	0	50188.1
B4E2S7;P13473	B4E2S7;P13473	;LAMP2	B4E2S7_HUMAN;LAMP2_HUMAN	IPLNDLFR	98;145	_IPLNDLFR_.2	_IPLNDLFR_	5.09669e+06	4.01369e+06	14208963
B4E2S7;P13473	B4E2S7;P13473	;LAMP2	B4E2S7_HUMAN;LAMP2_HUMAN	YLDFVFAVK	234;281	_YLDFVFAVK_.2	_YLDFVFAVK_	285358	381703	371940
B4E2S7;P13473	B4E2S7;P13473	;LAMP2	B4E2S7_HUMAN;LAMP2_HUMAN	GILTVDELLAIR	86;133	_GILTVDELLAIR_.2	_GILTVDELLAIR_	1	0	0
B4E343;Q9BVJ6	B4E343;Q9BVJ6	;UTP14A	B4E343_HUMAN;UT14A_HUMAN	EEPAPEEEEPLLLQRPER	436;490	_EEPAPEEEEPLLLQRPER_.3	_EEPAPEEEEPLLLQRPER_	0	0	229644
B4E367;Q6UX71	B4E367;Q6UX71	;PLXDC2	B4E367_HUMAN;PXDC2_HUMAN	IQQIPNVR	276;290	_IQQIPNVR_.2	_IQQIPNVR_	2359223	3506889	3334500
B4E367;Q6UX71	B4E367;Q6UX71	;PLXDC2	B4E367_HUMAN;PXDC2_HUMAN	IYGPSDSASR	106;120	_IYGPSDSASR_.2	_IYGPSDSASR_	368257	309544	310995
B4E367;Q6UX71	B4E367;Q6UX71	;PLXDC2	B4E367_HUMAN;PXDC2_HUMAN	VGLSDAFVVVHR	264;278	_VGLSDAFVVVHR_.3	_VGLSDAFVVVHR_	1.37897e+06	2380381	3.08155e+06
B4E367;Q6UX71	B4E367;Q6UX71	;PLXDC2	B4E367_HUMAN;PXDC2_HUMAN	VGLSDAFVVVHR	264;278	_VGLSDAFVVVHR_.2	_VGLSDAFVVVHR_	1.37897e+06	2380381	3.08155e+06
B4E367;Q6UX71	B4E367;Q6UX71	;PLXDC2	B4E367_HUMAN;PXDC2_HUMAN	EITVATGGFIYTGEVVHR	160;174	_EITVATGGFIYTGEVVHR_.3	_EITVATGGFIYTGEVVHR_	112580	157978	298963
B4E3P1	B4E3P1		B4E3P1_HUMAN	GIQLVEEELDR	91	_GIQLVEEELDR_.2	_GIQLVEEELDR_	9844845	13674277	2.92515e+06
B4E3P1	B4E3P1		B4E3P1_HUMAN	GIQLVEEELDRAQER	91	_GIQLVEEELDRAQER_.3	_GIQLVEEELDRAQER_	2.88919e+06	6891561	1215054
B4E3P1	B4E3P1		B4E3P1_HUMAN	GIQLVEEELDRAQER	91	_GIQLVEEELDRAQER_.2	_GIQLVEEELDRAQER_	2.88919e+06	6891561	1215054
B7Z553;D9ZGG2;P04004	B7Z553;D9ZGG2;P04004	;VTN;VTN	B7Z553_HUMAN;D9ZGG2_HUMAN;VTNC_HUMAN	DVWGIEGPIDAAFTR	129;198;198	_DVWGIEGPIDAAFTR_.2	_DVWGIEGPIDAAFTR_	696493	303503	882333
B7Z8Q2;P02765	B7Z8Q2;P02765	;AHSG	B7Z8Q2_HUMAN;FETUA_HUMAN	CNLLAEK	285;219	_C[Carbamidomethyl (C)]NLLAEK_.2	_C[+57]NLLAEK_	785858560	471801088	415309056
B7Z8Q2;P02765	B7Z8Q2;P02765	;AHSG	B7Z8Q2_HUMAN;FETUA_HUMAN	CNLLAEK	285;219	_C[Carbamidomethyl (C)]NLLAEK_.1	_C[+57]NLLAEK_	785858560	471801088	415309056
B7Z8Q2;P02765	B7Z8Q2;P02765	;AHSG	B7Z8Q2_HUMAN;FETUA_HUMAN	CDSSPDSAEDVRK	198;132	_C[Carbamidomethyl (C)]DSSPDSAEDVRK_.3	_C[+57]DSSPDSAEDVRK_	42142472	41094788	25947064
B7Z8Q2;P02765	B7Z8Q2;P02765	;AHSG	B7Z8Q2_HUMAN;FETUA_HUMAN	CDSSPDSAEDVRK	198;132	_C[Carbamidomethyl (C)]DSSPDSAEDVRK_.2	_C[+57]DSSPDSAEDVRK_	42142472	41094788	25947064
B7Z8Q2;P02765	B7Z8Q2;P02765	;AHSG	B7Z8Q2_HUMAN;FETUA_HUMAN	CDSSPDSAEDVR	198;132	_C[Carbamidomethyl (C)]DSSPDSAEDVR_.2	_C[+57]DSSPDSAEDVR_	16942688	21496034	29366908
B7Z8Q2;P02765	B7Z8Q2;P02765	;AHSG	B7Z8Q2_HUMAN;FETUA_HUMAN	CNLLAEKQYGFCK	285;219	_C[Carbamidomethyl (C)]NLLAEKQYGFC[Carbamidomethyl (C)]K_.3	_C[+57]NLLAEKQYGFC[+57]K_	411231	0	227075
B7Z8Q2;P02765	B7Z8Q2;P02765	;AHSG	B7Z8Q2_HUMAN;FETUA_HUMAN	CNLLAEKQYGFCK	285;219	_C[Carbamidomethyl (C)]NLLAEKQYGFC[Carbamidomethyl (C)]K_.2	_C[+57]NLLAEKQYGFC[+57]K_	411231	0	227075
B7Z8R6;P02760	B7Z8R6;P02760	;AMBP	B7Z8R6_HUMAN;AMBP_HUMAN	ECLQTCR	217;276	_EC[Carbamidomethyl (C)]LQTC[Carbamidomethyl (C)]R_.2	_EC[+57]LQTC[+57]R_	17824316	23770848	15618515
B7Z8R6;P02760	B7Z8R6;P02760	;AMBP	B7Z8R6_HUMAN;AMBP_HUMAN	ECLQTCR	217;276	_EC[Carbamidomethyl (C)]LQTC[Carbamidomethyl (C)]R_.1	_EC[+57]LQTC[+57]R_	17824316	23770848	15618515
B7Z9B1;P55290	B7Z9B1;P55290	;CDH13	B7Z9B1_HUMAN;CAD13_HUMAN	SIVVSPILIPENQR	186;139	_SIVVSPILIPENQR_.2	_SIVVSPILIPENQR_	601742	609222	386028
B7Z9B1;P55290	B7Z9B1;P55290	;CDH13	B7Z9B1_HUMAN;CAD13_HUMAN	DIQGSLQDIFK	163;116	_DIQGSLQDIFK_.2	_DIQGSLQDIFK_	551895	963828	443606
B7Z9B1;P55290	B7Z9B1;P55290	;CDH13	B7Z9B1_HUMAN;CAD13_HUMAN	TLEGPVPLEVIVIDQNDNRPIFR	271;224	_TLEGPVPLEVIVIDQNDNRPIFR_.3	_TLEGPVPLEVIVIDQNDNRPIFR_	109767	61871.4	147870
B7Z9B1;P55290	B7Z9B1;P55290	;CDH13	B7Z9B1_HUMAN;CAD13_HUMAN	TLFVHAR	140;93	_TLFVHAR_.2	_TLFVHAR_	367037	174967	1.39313e+06
B7Z9B1;P55290	B7Z9B1;P55290	;CDH13	B7Z9B1_HUMAN;CAD13_HUMAN	INENTGSVSVTR	237;190	_INENTGSVSVTR_.2	_INENTGSVSVTR_	901918	516126	3.13111e+06
B7Z9B1;P55290	B7Z9B1;P55290	;CDH13	B7Z9B1_HUMAN;CAD13_HUMAN	VNSDGGLVALR	122;75	_VNSDGGLVALR_.2	_VNSDGGLVALR_	2.40828e+06	415056	974812
B7Z9B1;P55290	B7Z9B1;P55290	;CDH13	B7Z9B1_HUMAN;CAD13_HUMAN	YEVSSPYFK	113;66	_YEVSSPYFK_.2	_YEVSSPYFK_	264792	1.05451e+06	1.20472e+06
B7ZW00;D9ZGF2;P12111;Q59F25;Q6MZG6;Q8N4Z1	B7ZW00;D9ZGF2;P12111;Q59F25;Q6MZG6;Q8N4Z1	COL6A3;COL6A3;COL6A3;;DKFZp686D23123;	B7ZW00_HUMAN;D9ZGF2_HUMAN;CO6A3_HUMAN;Q59F25_HUMAN;Q6MZG6_HUMAN;Q8N4Z1_HUMAN	VIGGLLAGQTYHVAVVCYLR	2437;3044;3044;1569;425;846	_VIGGLLAGQTYHVAVVC[Carbamidomethyl (C)]YLR_.3	_VIGGLLAGQTYHVAVVC[+57]YLR_	96131.9	0	31671.9
B8ZZQ6;P06454;Q53S24;Q86YS2;Q8TBK9;V9HVW6	B8ZZQ6;P06454;Q53S24;Q86YS2;Q8TBK9;V9HVW6	PTMA;PTMA;PTMAP7;;PTMA;	B8ZZQ6_HUMAN;PTMA_HUMAN;Q53S24_HUMAN;Q86YS2_HUMAN;Q8TBK9_HUMAN;V9HVW6_HUMAN	SDAAVDTSSEITTK	2;2;2;2;2;2	_[Acetyl (Protein N-term)]SDAAVDTSSEITTK_.2	_[+42]SDAAVDTSSEITTK_	4255211	4.23927e+06	2.50444e+06
B8ZZQ6;P06454;Q53S24;Q86YS2;Q8TBK9;V9HVW6	B8ZZQ6;P06454;Q53S24;Q86YS2;Q8TBK9;V9HVW6	PTMA;PTMA;PTMAP7;;PTMA;	B8ZZQ6_HUMAN;PTMA_HUMAN;Q53S24_HUMAN;Q86YS2_HUMAN;Q8TBK9_HUMAN;V9HVW6_HUMAN	SDAAVDTSSEITTK	2;2;2;2;2;2	_SDAAVDTSSEITTK_.2	_SDAAVDTSSEITTK_	4255211	4.23927e+06	2.50444e+06
B8ZZQ6;P06454;Q53S24;Q86YS2;Q8TBK9;V9HVW6	B8ZZQ6;P06454;Q53S24;Q86YS2;Q8TBK9;V9HVW6	PTMA;PTMA;PTMAP7;;PTMA;	B8ZZQ6_HUMAN;PTMA_HUMAN;Q53S24_HUMAN;Q86YS2_HUMAN;Q8TBK9_HUMAN;V9HVW6_HUMAN	EVVEEAENGR	22;22;22;22;22;22	_EVVEEAENGR_.2	_EVVEEAENGR_	4822.48	52395.9	32536.8
B8ZZQ6;P06454;Q53S24;Q86YS2;Q8TBK9;V9HVW6	B8ZZQ6;P06454;Q53S24;Q86YS2;Q8TBK9;V9HVW6	PTMA;PTMA;PTMAP7;;PTMA;	B8ZZQ6_HUMAN;PTMA_HUMAN;Q53S24_HUMAN;Q86YS2_HUMAN;Q8TBK9_HUMAN;V9HVW6_HUMAN	AAEDDEDDDVDTKK	87;91;90;90;90;89	_AAEDDEDDDVDTKK_.3	_AAEDDEDDDVDTKK_	0	0	34412.4
B8ZZQ6;P06454;Q53S24;Q86YS2;Q8TBK9;V9HVW6	B8ZZQ6;P06454;Q53S24;Q86YS2;Q8TBK9;V9HVW6	PTMA;PTMA;PTMAP7;;PTMA;	B8ZZQ6_HUMAN;PTMA_HUMAN;Q53S24_HUMAN;Q86YS2_HUMAN;Q8TBK9_HUMAN;V9HVW6_HUMAN	AAEDDEDDDVDTKK	87;91;90;90;90;89	_AAEDDEDDDVDTKK_.2	_AAEDDEDDDVDTKK_	0	0	34412.4
C9IZG4;O60888	C9IZG4;O60888	CUTA	C9IZG4_HUMAN;CUTA_HUMAN	TQSSLVPALTDFVR	102;125	_TQSSLVPALTDFVR_.2	_TQSSLVPALTDFVR_	98514.1	109902	119664
D3DQH8;P09486	D3DQH8;P09486	SPARC	D3DQH8_HUMAN;SPRC_HUMAN	LEAGDHPVELLAR	218;206	_LEAGDHPVELLAR_.3	_LEAGDHPVELLAR_	15601870	15877944	16746699
D3DQH8;P09486	D3DQH8;P09486	SPARC	D3DQH8_HUMAN;SPRC_HUMAN	LEAGDHPVELLAR	218;206	_LEAGDHPVELLAR_.2	_LEAGDHPVELLAR_	15601870	15877944	16746699
D3DQH8;P09486	D3DQH8;P09486	SPARC	D3DQH8_HUMAN;SPRC_HUMAN	NVLVTLYER	185;173	_NVLVTLYER_.2	_NVLVTLYER_	8842974	11064169	3938152
D3DQH8;P09486	D3DQH8;P09486	SPARC	D3DQH8_HUMAN;SPRC_HUMAN	RLEAGDHPVELLAR	217;205	_RLEAGDHPVELLAR_.3	_RLEAGDHPVELLAR_	446949	1.17096e+06	382502
D3DQH8;P09486	D3DQH8;P09486	SPARC	D3DQH8_HUMAN;SPRC_HUMAN	RLEAGDHPVELLAR	217;205	_RLEAGDHPVELLAR_.4	_RLEAGDHPVELLAR_	446949	1.17096e+06	382502
D3DQH8;P09486	D3DQH8;P09486	SPARC	D3DQH8_HUMAN;SPRC_HUMAN	NYNMYIFPVHWQFGQLDQHPIDGYLSHTELAPLR	235;223	_NYNM[Oxidation (M)]YIFPVHWQFGQLDQHPIDGYLSHTELAPLR_.5	_NYNM[+16]YIFPVHWQFGQLDQHPIDGYLSHTELAPLR_	134326	42553.1	142381
D3DQH8;P09486	D3DQH8;P09486	SPARC	D3DQH8_HUMAN;SPRC_HUMAN	NYNMYIFPVHWQFGQLDQHPIDGYLSHTELAPLR	235;223	_NYNMYIFPVHWQFGQLDQHPIDGYLSHTELAPLR_.5	_NYNMYIFPVHWQFGQLDQHPIDGYLSHTELAPLR_	134326	42553.1	142381
D3DQH8;P09486	D3DQH8;P09486	SPARC	D3DQH8_HUMAN;SPRC_HUMAN	LHLDYIGPCK	153;141	_LHLDYIGPC[Carbamidomethyl (C)]K_.2	_LHLDYIGPC[+57]K_	8060839	1.82256e+06	5328246
D3DQH8;P09486	D3DQH8;P09486	SPARC	D3DQH8_HUMAN;SPRC_HUMAN	LHLDYIGPCK	153;141	_LHLDYIGPC[Carbamidomethyl (C)]K_.3	_LHLDYIGPC[+57]K_	8060839	1.82256e+06	5328246
D3DQH8;P09486	D3DQH8;P09486	SPARC	D3DQH8_HUMAN;SPRC_HUMAN	NVLVTLYERDEDNNLLTEK	185;173	_NVLVTLYERDEDNNLLTEK_.3	_NVLVTLYERDEDNNLLTEK_	5941600	6.00103e+06	19883634
D3DQH8;P09486	D3DQH8;P09486	SPARC	D3DQH8_HUMAN;SPRC_HUMAN	YIPPCLDSELTEFPLR	163;151	_YIPPC[Carbamidomethyl (C)]LDSELTEFPLR_.2	_YIPPC[+57]LDSELTEFPLR_	634629	678429	1.04936e+06
D3DQH8;P09486	D3DQH8;P09486	SPARC	D3DQH8_HUMAN;SPRC_HUMAN	YIPPCLDSELTEFPLR	163;151	_YIPPC[Carbamidomethyl (C)]LDSELTEFPLR_.3	_YIPPC[+57]LDSELTEFPLR_	634629	678429	1.04936e+06
D3DQH8;P09486	D3DQH8;P09486	SPARC	D3DQH8_HUMAN;SPRC_HUMAN	DEDNNLLTEK	194;182	_DEDNNLLTEK_.2	_DEDNNLLTEK_	1.80373e+06	2.65948e+06	2219874
D3DQH8;P09486	D3DQH8;P09486	SPARC	D3DQH8_HUMAN;SPRC_HUMAN	TFDSSCHFFATK	130;118	_TFDSSC[Carbamidomethyl (C)]HFFATK_.2	_TFDSSC[+57]HFFATK_	1.62022e+06	324010	175295
D3DQH8;P09486	D3DQH8;P09486	SPARC	D3DQH8_HUMAN;SPRC_HUMAN	TFDSSCHFFATK	130;118	_TFDSSC[Carbamidomethyl (C)]HFFATK_.3	_TFDSSC[+57]HFFATK_	1.62022e+06	324010	175295
D3DQH8;P09486	D3DQH8;P09486	SPARC	D3DQH8_HUMAN;SPRC_HUMAN	APLIPMEHCTTR	269;257	_APLIPMEHC[Carbamidomethyl (C)]TTR_.3	_APLIPMEHC[+57]TTR_	469508	1.12665e+06	71322.1
D3DQH8;P09486	D3DQH8;P09486	SPARC	D3DQH8_HUMAN;SPRC_HUMAN	APLIPMEHCTTR	269;257	_APLIPMEHC[Carbamidomethyl (C)]TTR_.2	_APLIPMEHC[+57]TTR_	469508	1.12665e+06	71322.1
D3DQH8;P09486	D3DQH8;P09486	SPARC	D3DQH8_HUMAN;SPRC_HUMAN	CTLEGTK	142;130	_C[Carbamidomethyl (C)]TLEGTK_.2	_C[+57]TLEGTK_	145908	0	0
D3DQH8;P09486	D3DQH8;P09486	SPARC	D3DQH8_HUMAN;SPRC_HUMAN	QKDIDKDLVI	306;294	_QKDIDKDLVI_.3	_QKDIDKDLVI_	3.45521e+06	719605	1.07383e+06
D3DQH8;P09486	D3DQH8;P09486	SPARC	D3DQH8_HUMAN;SPRC_HUMAN	QKDIDKDLVI	306;294	_QKDIDKDLVI_.2	_QKDIDKDLVI_	3.45521e+06	719605	1.07383e+06
D3DQH8;P09486	D3DQH8;P09486	SPARC	D3DQH8_HUMAN;SPRC_HUMAN	CTLEGTKK	142;130	_C[Carbamidomethyl (C)]TLEGTKK_.2	_C[+57]TLEGTKK_	0	104053	54406.7
D3DSM4;D3DSM5;P39060	D3DSM4;D3DSM5;P39060	COL18A1	D3DSM4_HUMAN;D3DSM5_HUMAN;COIA1_HUMAN	ELLREETGAALKPR	260;440;675	_ELLREETGAALKPR_.3	_ELLREETGAALKPR_	44767.7	133155	0
D3DVC4;P48681	D3DVC4;P48681	NES	D3DVC4_HUMAN;NEST_HUMAN	SPEEVDKESQR	905;905	_SPEEVDKESQR_.3	_SPEEVDKESQR_	36161.2	0	0
D3DVC4;P48681	D3DVC4;P48681	NES	D3DVC4_HUMAN;NEST_HUMAN	SPEEVDKESQR	905;905	_SPEEVDKESQR_.2	_SPEEVDKESQR_	36161.2	0	0
D3DVC4;P48681	D3DVC4;P48681	NES	D3DVC4_HUMAN;NEST_HUMAN	VAIPASVLPGPEEPGGQR	434;434	_VAIPASVLPGPEEPGGQR_.2	_VAIPASVLPGPEEPGGQR_	0	0	1.60349
D3DVC4;P48681	D3DVC4;P48681	NES	D3DVC4_HUMAN;NEST_HUMAN	VAIPASVLPGPEEPGGQR	434;434	_VAIPASVLPGPEEPGGQR_.3	_VAIPASVLPGPEEPGGQR_	0	0	1.60349
D6RBJ7;D6RF35;P02774;V9HWI6	D6RBJ7;D6RF35;P02774;V9HWI6	GC;GC;GC;HEL-S-51	D6RBJ7_HUMAN;D6RF35_HUMAN;VTDB_HUMAN;V9HWI6_HUMAN	HQPQEFPTYVEPTNDEICEAFR	128;128;128;128	_HQPQEFPTYVEPTNDEIC[Carbamidomethyl (C)]EAFR_.3	_HQPQEFPTYVEPTNDEIC[+57]EAFR_	164370	201484	694757
D6RBJ7;D6RF35;P02774;V9HWI6	D6RBJ7;D6RF35;P02774;V9HWI6	GC;GC;GC;HEL-S-51	D6RBJ7_HUMAN;D6RF35_HUMAN;VTDB_HUMAN;V9HWI6_HUMAN	LCDNLSTK	285;285;285;285	_LC[Carbamidomethyl (C)]DNLSTK_.2	_LC[+57]DNLSTK_	1.15852e+06	878276	966241
D6RF86;P55285	D6RF86;P55285	CDH6	D6RF86_HUMAN;CADH6_HUMAN	FLYLGPFK	303;358	_FLYLGPFK_.2	_FLYLGPFK_	66602.4	119907	61963.5
E7DVW5;Q01469	E7DVW5;Q01469	FABP5	E7DVW5_HUMAN;FABP5_HUMAN	ATVQQLEGR	2;2	_[Acetyl (Protein N-term)]ATVQQLEGR_.2	_[+42]ATVQQLEGR_	5289457	1.32606e+06	4.58327e+06
E7DVW5;Q01469	E7DVW5;Q01469	FABP5	E7DVW5_HUMAN;FABP5_HUMAN	ELGVGIALR	25;25	_ELGVGIALR_.2	_ELGVGIALR_	601508	788810	129960
E7EVA0;P27816	E7EVA0;P27816	MAP4	E7EVA0_HUMAN;MAP4_HUMAN	NVCLPPEMEVALTEDQVPALK	550;533	_NVC[Carbamidomethyl (C)]LPPEMEVALTEDQVPALK_.3	_NVC[+57]LPPEMEVALTEDQVPALK_	6444.91	0	0
E7EVA0;P27816	E7EVA0;P27816	MAP4	E7EVA0_HUMAN;MAP4_HUMAN	ASPSKPASAPASR	1931;786	_ASPSKPASAPASR_.3	_ASPSKPASAPASR_	1.31858	0	0
E7EVA0;P27816	E7EVA0;P27816	MAP4	E7EVA0_HUMAN;MAP4_HUMAN	ASPSKPASAPASR	1931;786	_ASPSKPASAPASR_.2	_ASPSKPASAPASR_	1.31858	0	0
E9PD35;P35916;Q59F24	E9PD35;P35916;Q59F24	FLT4;FLT4;	E9PD35_HUMAN;VGFR3_HUMAN;Q59F24_HUMAN	YLSVQALEAPR	669;669;367	_YLSVQALEAPR_.2	_YLSVQALEAPR_	893529	1.32192e+06	629930
E9PGC8;P78559	E9PGC8;P78559	MAP1A	E9PGC8_HUMAN;MAP1A_HUMAN	EPTPYPDER	2193;1955	_EPTPYPDER_.2	_EPTPYPDER_	484929	0	0
E9PGZ1	E9PGZ1	CALD1	E9PGZ1_HUMAN	LQEALER	105	_LQEALER_.2	_LQEALER_	0	147414	544235
E9PGZ1	E9PGZ1	CALD1	E9PGZ1_HUMAN	LQEALER	105	_LQEALER_.1	_LQEALER_	0	147414	544235
E9PGZ1	E9PGZ1	CALD1	E9PGZ1_HUMAN	EAEGAPQVEAGK	262	_EAEGAPQVEAGK_.2	_EAEGAPQVEAGK_	1	0	0
E9PGZ1	E9PGZ1	CALD1	E9PGZ1_HUMAN	SAKPTKPAASDLPVPAEGVR	430	_SAKPTKPAASDLPVPAEGVR_.4	_SAKPTKPAASDLPVPAEGVR_	0	0	1
E9PGZ1	E9PGZ1	CALD1	E9PGZ1_HUMAN	SAKPTKPAASDLPVPAEGVR	430	_SAKPTKPAASDLPVPAEGVR_.3	_SAKPTKPAASDLPVPAEGVR_	0	0	1
E9PHY5;O43491	E9PHY5;O43491	EPB41L2	E9PHY5_HUMAN;E41L2_HUMAN	EISPGSGPGEIR	643;713	_EISPGSGPGEIR_.2	_EISPGSGPGEIR_	0	0	92147
F6RFD5;P60981;V9HWA6	F6RFD5;P60981;V9HWA6	DSTN;DSTN;HEL32	F6RFD5_HUMAN;DEST_HUMAN;V9HWA6_HUMAN	ASGVQVADEVCR	2;2;2	_[Acetyl (Protein N-term)]ASGVQVADEVC[Carbamidomethyl (C)]R_.2	_[+42]ASGVQVADEVC[+57]R_	0	1.36254e+06	0
F6SYF8;Q9UBP4	F6SYF8;Q9UBP4	DKK3	F6SYF8_HUMAN;DKK3_HUMAN	DCQPGLCCAFQR	213;213	_DC[Carbamidomethyl (C)]QPGLC[Carbamidomethyl (C)]C[Carbamidomethyl (C)]AFQR_.2	_DC[+57]QPGLC[+57]C[+57]AFQR_	12797913	4.37996e+06	13055649
F6SYF8;Q9UBP4	F6SYF8;Q9UBP4	DKK3	F6SYF8_HUMAN;DKK3_HUMAN	GLLFPVCTPLPVEGELCHDPASR	225;225	_GLLFPVC[Carbamidomethyl (C)]TPLPVEGELC[Carbamidomethyl (C)]HDPASR_.3	_GLLFPVC[+57]TPLPVEGELC[+57]HDPASR_	203589	273692	379744
F6SYF8;Q9UBP4	F6SYF8;Q9UBP4	DKK3	F6SYF8_HUMAN;DKK3_HUMAN	DQDGEILLPR	307;293	_DQDGEILLPR_.2	_DQDGEILLPR_	17518754	16819396	14698693
F6SYF8;Q9UBP4	F6SYF8;Q9UBP4	DKK3	F6SYF8_HUMAN;DKK3_HUMAN	LLDLITWELEPDGALDR	248;248	_LLDLITWELEPDGALDR_.2	_LLDLITWELEPDGALDR_	181289	75657.9	0
F6SYF8;Q9UBP4	F6SYF8;Q9UBP4	DKK3	F6SYF8_HUMAN;DKK3_HUMAN	LLDLITWELEPDGALDR	248;248	_LLDLITWELEPDGALDR_.3	_LLDLITWELEPDGALDR_	181289	75657.9	0
F6SYF8;Q9UBP4	F6SYF8;Q9UBP4	DKK3	F6SYF8_HUMAN;DKK3_HUMAN	EPAAAAAALLGGEEI	350;336	_EPAAAAAALLGGEEI_.2	_EPAAAAAALLGGEEI_	48795.1	74185.3	56037.7
F6SYF8;Q9UBP4	F6SYF8;Q9UBP4	DKK3	F6SYF8_HUMAN;DKK3_HUMAN	DSECCGDQLCVWGHCTK	181;181	_DSEC[Carbamidomethyl (C)]C[Carbamidomethyl (C)]GDQLC[Carbamidomethyl (C)]VWGHC[Carbamidomethyl (C)]TK_.3	_DSEC[+57]C[+57]GDQLC[+57]VWGHC[+57]TK_	241828	0	0
F8W1R7;G3V1V0;P60660	F8W1R7;G3V1V0;P60660	MYL6	F8W1R7_HUMAN;G3V1V0_HUMAN;MYL6_HUMAN	NKDQGTYEDYVEGLR	80;80;80	_NKDQGTYEDYVEGLR_.3	_NKDQGTYEDYVEGLR_	0	0	435512
G3V1N2	G3V1N2	HBA2	G3V1N2_HUMAN	FLSFPTTK	2	_FLSFPTTK_.2	_FLSFPTTK_	28370430	36250564	12234108
G3V3X5;G3V511;Q14767;Q59EE6;Q6AZ94	G3V3X5;G3V511;Q14767;Q59EE6;Q6AZ94	LTBP2;LTBP2;LTBP2;;LTBP2	G3V3X5_HUMAN;G3V511_HUMAN;LTBP2_HUMAN;Q59EE6_HUMAN;Q6AZ94_HUMAN	SSEVYAQLCNVAR	1584;1628;1628;1507;1628	_SSEVYAQLC[Carbamidomethyl (C)]NVAR_.2	_SSEVYAQLC[+57]NVAR_	580448	0	0
H0Y614;P61960	H0Y614;P61960	UFM1	H0Y614_HUMAN;UFM1_HUMAN	VLSVPESTPFTAVLK	21;20	_VLSVPESTPFTAVLK_.2	_VLSVPESTPFTAVLK_	0	1	0
H6VRF8;H6VRG0;H6VRG1;H6VRG3;P04264	H6VRF8;H6VRG0;H6VRG1;H6VRG3;P04264	KRT1	H6VRF8_HUMAN;H6VRG0_HUMAN;H6VRG1_HUMAN;H6VRG3_HUMAN;K2C1_HUMAN	WELLQQVDTSTR	212;212;213;212;212	_WELLQQVDTSTR_.2	_WELLQQVDTSTR_	23262324	13754273	25285100
H6VRF8;H6VRG0;H6VRG1;H6VRG3;P04264	H6VRF8;H6VRG0;H6VRG1;H6VRG3;P04264	KRT1	H6VRF8_HUMAN;H6VRG0_HUMAN;H6VRG1_HUMAN;H6VRG3_HUMAN;K2C1_HUMAN	TLLEGEESR	484;484;485;484;484	_TLLEGEESR_.2	_TLLEGEESR_	69506536	33151064	52200680
H6VRF8;H6VRG0;H6VRG1;H6VRG3;P04264	H6VRF8;H6VRG0;H6VRG1;H6VRG3;P04264	KRT1	H6VRF8_HUMAN;H6VRG0_HUMAN;H6VRG1_HUMAN;H6VRG3_HUMAN;K2C1_HUMAN	FLEQQNQVLQTK	200;200;201;200;200	_FLEQQNQVLQTK_.2	_FLEQQNQVLQTK_	40217824	93413712	10776552
H6VRF8;H6VRG0;H6VRG1;H6VRG3;P04264	H6VRF8;H6VRG0;H6VRG1;H6VRG3;P04264	KRT1	H6VRF8_HUMAN;H6VRG0_HUMAN;H6VRG1_HUMAN;H6VRG3_HUMAN;K2C1_HUMAN	YEELQITAGR	377;377;378;377;377	_YEELQITAGR_.2	_YEELQITAGR_	23384932	58525192	5681944
H6VRF8;H6VRG0;H6VRG1;H6VRG3;P04264	H6VRF8;H6VRG0;H6VRG1;H6VRG3;P04264	KRT1	H6VRF8_HUMAN;H6VRG0_HUMAN;H6VRG1_HUMAN;H6VRG3_HUMAN;K2C1_HUMAN	LRSEIDNVKK	408;408;409;408;408	_LRSEIDNVKK_.3	_LRSEIDNVKK_	26590598	33553838	22979156
H6VRF8;H6VRG0;H6VRG1;H6VRG3;P04264	H6VRF8;H6VRG0;H6VRG1;H6VRG3;P04264	KRT1	H6VRF8_HUMAN;H6VRG0_HUMAN;H6VRG1_HUMAN;H6VRG3_HUMAN;K2C1_HUMAN	LRSEIDNVKK	408;408;409;408;408	_LRSEIDNVKK_.2	_LRSEIDNVKK_	26590598	33553838	22979156
H6VRF8;H6VRG0;H6VRG1;H6VRG3;P04264	H6VRF8;H6VRG0;H6VRG1;H6VRG3;P04264	KRT1	H6VRF8_HUMAN;H6VRG0_HUMAN;H6VRG1_HUMAN;H6VRG3_HUMAN;K2C1_HUMAN	IEISELNR	396;396;397;396;396	_IEISELNR_.2	_IEISELNR_	17559980	10736007	8.37771e+06
H6VRF8;H6VRG0;H6VRG1;H6VRG3;P04264	H6VRF8;H6VRG0;H6VRG1;H6VRG3;P04264	KRT1	H6VRF8_HUMAN;H6VRG0_HUMAN;H6VRG1_HUMAN;H6VRG3_HUMAN;K2C1_HUMAN	LNDLEDALQQAK	444;444;445;444;444	_LNDLEDALQQAK_.2	_LNDLEDALQQAK_	45851296	50735332	44182772
H6VRF8;H6VRG0;H6VRG1;H6VRG3;P04264	H6VRF8;H6VRG0;H6VRG1;H6VRG3;P04264	KRT1	H6VRF8_HUMAN;H6VRG0_HUMAN;H6VRG1_HUMAN;H6VRG3_HUMAN;K2C1_HUMAN	FSSCGGGGGSFGAGGGFGSR	46;46;46;46;46	_FSSC[Carbamidomethyl (C)]GGGGGSFGAGGGFGSR_.2	_FSSC[+57]GGGGGSFGAGGGFGSR_	11642649	22371650	3188939
H6VRF8;H6VRG0;H6VRG1;H6VRG3;P04264	H6VRF8;H6VRG0;H6VRG1;H6VRG3;P04264	KRT1	H6VRF8_HUMAN;H6VRG0_HUMAN;H6VRG1_HUMAN;H6VRG3_HUMAN;K2C1_HUMAN	QISNLQQSISDAEQR	418;418;419;418;418	_QISNLQQSISDAEQR_.2	_QISNLQQSISDAEQR_	22104018	9074054	23732030
H6VRF8;H6VRG0;H6VRG1;H6VRG3;P04264	H6VRF8;H6VRG0;H6VRG1;H6VRG3;P04264	KRT1	H6VRF8_HUMAN;H6VRG0_HUMAN;H6VRG1_HUMAN;H6VRG3_HUMAN;K2C1_HUMAN	QISNLQQSISDAEQR	418;418;419;418;418	_QISNLQQSISDAEQR_.3	_QISNLQQSISDAEQR_	22104018	9074054	23732030
H6VRF8;H6VRG0;H6VRG1;H6VRG3;P04264	H6VRF8;H6VRG0;H6VRG1;H6VRG3;P04264	KRT1	H6VRF8_HUMAN;H6VRG0_HUMAN;H6VRG1_HUMAN;H6VRG3_HUMAN;K2C1_HUMAN	SISISVAR	75;75;75;75;75	_SISISVAR_.2	_SISISVAR_	32344282	46276768	8.20479e+06
H6VRF8;H6VRG0;H6VRG1;H6VRG3;P04264	H6VRF8;H6VRG0;H6VRG1;H6VRG3;P04264	KRT1	H6VRF8_HUMAN;H6VRG0_HUMAN;H6VRG1_HUMAN;H6VRG3_HUMAN;K2C1_HUMAN	NKLNDLEDALQQAK	442;442;443;442;442	_NKLNDLEDALQQAK_.2	_NKLNDLEDALQQAK_	20265498	21087784	14837224
H6VRF8;H6VRG0;H6VRG1;H6VRG3;P04264	H6VRF8;H6VRG0;H6VRG1;H6VRG3;P04264	KRT1	H6VRF8_HUMAN;H6VRG0_HUMAN;H6VRG1_HUMAN;H6VRG3_HUMAN;K2C1_HUMAN	NKLNDLEDALQQAK	442;442;443;442;442	_NKLNDLEDALQQAK_.3	_NKLNDLEDALQQAK_	20265498	21087784	14837224
H6VRF8;H6VRG0;H6VRG1;H6VRG3;P04264	H6VRF8;H6VRG0;H6VRG1;H6VRG3;P04264	KRT1	H6VRF8_HUMAN;H6VRG0_HUMAN;H6VRG1_HUMAN;H6VRG3_HUMAN;K2C1_HUMAN	SLVNLGGSK	66;66;66;66;66	_SLVNLGGSK_.2	_SLVNLGGSK_	4.92485e+06	3.16695e+06	5374047
H6VRF8;H6VRG0;H6VRG1;H6VRG3;P04264	H6VRF8;H6VRG0;H6VRG1;H6VRG3;P04264	KRT1	H6VRF8_HUMAN;H6VRG0_HUMAN;H6VRG1_HUMAN;H6VRG3_HUMAN;K2C1_HUMAN	SLVNLGGSK	66;66;66;66;66	_SLVNLGGSK_.1	_SLVNLGGSK_	4.92485e+06	3.16695e+06	5374047
H6VRF8;H6VRG0;H6VRG1;H6VRG3;P04264	H6VRF8;H6VRG0;H6VRG1;H6VRG3;P04264	KRT1	H6VRF8_HUMAN;H6VRG0_HUMAN;H6VRG1_HUMAN;H6VRG3_HUMAN;K2C1_HUMAN	AQYEDIAQK	356;356;357;356;356	_AQYEDIAQK_.2	_AQYEDIAQK_	17288976	15943912	39092328
H6VRF8;H6VRG0;H6VRG1;H6VRG3;P04264	H6VRF8;H6VRG0;H6VRG1;H6VRG3;P04264	KRT1	H6VRF8_HUMAN;H6VRG0_HUMAN;H6VRG1_HUMAN;H6VRG3_HUMAN;K2C1_HUMAN	SGGGFSSGSAGIINYQR	13;13;13;13;13	_SGGGFSSGSAGIINYQR_.2	_SGGGFSSGSAGIINYQR_	11846173	13572468	13763864
H6VRF8;H6VRG0;H6VRG1;H6VRG3;P04264	H6VRF8;H6VRG0;H6VRG1;H6VRG3;P04264	KRT1	H6VRF8_HUMAN;H6VRG0_HUMAN;H6VRG1_HUMAN;H6VRG3_HUMAN;K2C1_HUMAN	TNAENEFVTIKK	278;278;279;278;278	_TNAENEFVTIKK_.3	_TNAENEFVTIKK_	8302439	10775638	9260324
H6VRF8;H6VRG0;H6VRG1;H6VRG3;P04264	H6VRF8;H6VRG0;H6VRG1;H6VRG3;P04264	KRT1	H6VRF8_HUMAN;H6VRG0_HUMAN;H6VRG1_HUMAN;H6VRG3_HUMAN;K2C1_HUMAN	TNAENEFVTIKK	278;278;279;278;278	_TNAENEFVTIKK_.2	_TNAENEFVTIKK_	8302439	10775638	9260324
H6VRF8;H6VRG0;H6VRG1;H6VRG3;P04264	H6VRF8;H6VRG0;H6VRG1;H6VRG3;P04264	KRT1	H6VRF8_HUMAN;H6VRG0_HUMAN;H6VRG1_HUMAN;H6VRG3_HUMAN;K2C1_HUMAN	TNAENEFVTIK	278;278;279;278;278	_TNAENEFVTIK_.2	_TNAENEFVTIK_	22778734	4595041	11383225
H6VRF8;H6VRG0;H6VRG1;H6VRG3;P04264	H6VRF8;H6VRG0;H6VRG1;H6VRG3;P04264	KRT1	H6VRF8_HUMAN;H6VRG0_HUMAN;H6VRG1_HUMAN;H6VRG3_HUMAN;K2C1_HUMAN	THNLEPYFESFINNLR	224;224;225;224;224	_THNLEPYFESFINNLR_.3	_THNLEPYFESFINNLR_	1679145	1.03099e+06	1.90586e+06
H6VRF8;H6VRG0;H6VRG1;H6VRG3;P04264	H6VRF8;H6VRG0;H6VRG1;H6VRG3;P04264	KRT1	H6VRF8_HUMAN;H6VRG0_HUMAN;H6VRG1_HUMAN;H6VRG3_HUMAN;K2C1_HUMAN	THNLEPYFESFINNLR	224;224;225;224;224	_THNLEPYFESFINNLR_.2	_THNLEPYFESFINNLR_	1679145	1.03099e+06	1.90586e+06
H6VRF8;H6VRG0;H6VRG1;H6VRG3;P04264	H6VRF8;H6VRG0;H6VRG1;H6VRG3;P04264	KRT1	H6VRF8_HUMAN;H6VRG0_HUMAN;H6VRG1_HUMAN;H6VRG3_HUMAN;K2C1_HUMAN	MSGECAPNVSVSVSTSHTTISGGGSR	493;493;494;493;493	_M[Oxidation (M)]SGEC[Carbamidomethyl (C)]APNVSVSVSTSHTTISGGGSR_.3	_M[+16]SGEC[+57]APNVSVSVSTSHTTISGGGSR_	541417	701227	205467
H6VRF8;H6VRG0;H6VRG1;H6VRG3;P04264	H6VRF8;H6VRG0;H6VRG1;H6VRG3;P04264	KRT1	H6VRF8_HUMAN;H6VRG0_HUMAN;H6VRG1_HUMAN;H6VRG3_HUMAN;K2C1_HUMAN	MSGECAPNVSVSVSTSHTTISGGGSR	493;493;494;493;493	_MSGEC[Carbamidomethyl (C)]APNVSVSVSTSHTTISGGGSR_.3	_MSGEC[+57]APNVSVSVSTSHTTISGGGSR_	541417	701227	205467
H6VRF8;H6VRG0;H6VRG1;H6VRG3;P04264	H6VRF8;H6VRG0;H6VRG1;H6VRG3;P04264	KRT1	H6VRF8_HUMAN;H6VRG0_HUMAN;H6VRG1_HUMAN;H6VRG3_HUMAN;K2C1_HUMAN	DYQELMNTK	464;464;465;464;464	_DYQELMNTK_.2	_DYQELMNTK_	491829	934608	423443
H6VRF8;H6VRG0;H6VRG1;H6VRG3;P04264	H6VRF8;H6VRG0;H6VRG1;H6VRG3;P04264	KRT1	H6VRF8_HUMAN;H6VRG0_HUMAN;H6VRG1_HUMAN;H6VRG3_HUMAN;K2C1_HUMAN	NKLNDLEDALQQAKEDLAR	442;442;443;442;442	_NKLNDLEDALQQAKEDLAR_.3	_NKLNDLEDALQQAKEDLAR_	1.57963e+06	2.0222e+06	1.84109e+06
H6VRF8;H6VRG0;H6VRG1;H6VRG3;P04264	H6VRF8;H6VRG0;H6VRG1;H6VRG3;P04264	KRT1	H6VRF8_HUMAN;H6VRG0_HUMAN;H6VRG1_HUMAN;H6VRG3_HUMAN;K2C1_HUMAN	THNLEPYFESFINNLRR	224;224;225;224;224	_THNLEPYFESFINNLRR_.4	_THNLEPYFESFINNLRR_	377820	609777	388459
H6VRF8;H6VRG0;H6VRG1;H6VRG3;P04264	H6VRF8;H6VRG0;H6VRG1;H6VRG3;P04264	KRT1	H6VRF8_HUMAN;H6VRG0_HUMAN;H6VRG1_HUMAN;H6VRG3_HUMAN;K2C1_HUMAN	SLNNQFASFIDK	186;186;187;186;186	_SLNNQFASFIDK_.2	_SLNNQFASFIDK_	12291267	11448128	24074968
H6VRF8;H6VRG0;H6VRG1;H6VRG3;P04264	H6VRF8;H6VRG0;H6VRG1;H6VRG3;P04264	KRT1	H6VRF8_HUMAN;H6VRG0_HUMAN;H6VRG1_HUMAN;H6VRG3_HUMAN;K2C1_HUMAN	SKAEAESLYQSK	365;365;366;365;365	_SKAEAESLYQSK_.3	_SKAEAESLYQSK_	2.12734e+06	2.25658e+06	2.55667e+06
H6VRF8;H6VRG0;H6VRG1;H6VRG3;P04264	H6VRF8;H6VRG0;H6VRG1;H6VRG3;P04264	KRT1	H6VRF8_HUMAN;H6VRG0_HUMAN;H6VRG1_HUMAN;H6VRG3_HUMAN;K2C1_HUMAN	SKAEAESLYQSK	365;365;366;365;365	_SKAEAESLYQSK_.2	_SKAEAESLYQSK_	2.12734e+06	2.25658e+06	2.55667e+06
H6VRF8;H6VRG0;H6VRG1;H6VRG3;P04264	H6VRF8;H6VRG0;H6VRG1;H6VRG3;P04264	KRT1	H6VRF8_HUMAN;H6VRG0_HUMAN;H6VRG1_HUMAN;H6VRG3_HUMAN;K2C1_HUMAN	LRSEIDNVK	408;408;409;408;408	_LRSEIDNVK_.2	_LRSEIDNVK_	984349	524517	841404
H6VRF8;H6VRG0;H6VRG1;H6VRG3;P04264	H6VRF8;H6VRG0;H6VRG1;H6VRG3;P04264	KRT1	H6VRF8_HUMAN;H6VRG0_HUMAN;H6VRG1_HUMAN;H6VRG3_HUMAN;K2C1_HUMAN	GSGGGSSGGSIGGR	603;603;604;603;603	_GSGGGSSGGSIGGR_.2	_GSGGGSSGGSIGGR_	1.4519e+06	2.75797e+06	1.55049e+06
H6VRF8;H6VRG0;H6VRG1;H6VRG3;P04264	H6VRF8;H6VRG0;H6VRG1;H6VRG3;P04264	KRT1	H6VRF8_HUMAN;H6VRG0_HUMAN;H6VRG1_HUMAN;H6VRG3_HUMAN;K2C1_HUMAN	GGGGGGYGSGGSSYGSGGGSYGSGGGGGGGR	519;519;520;519;519	_GGGGGGYGSGGSSYGSGGGSYGSGGGGGGGR_.3	_GGGGGGYGSGGSSYGSGGGSYGSGGGGGGGR_	54380.4	13781.6	79189.3
H6VRF8;H6VRG0;H6VRG1;H6VRG3;P04264	H6VRF8;H6VRG0;H6VRG1;H6VRG3;P04264	KRT1	H6VRF8_HUMAN;H6VRG0_HUMAN;H6VRG1_HUMAN;H6VRG3_HUMAN;K2C1_HUMAN	AEAESLYQSK	367;367;368;367;367	_AEAESLYQSK_.2	_AEAESLYQSK_	5924805	5335497	15759539
H6VRF8;H6VRG0;H6VRG1;H6VRG3;P04264	H6VRF8;H6VRG0;H6VRG1;H6VRG3;P04264	KRT1	H6VRF8_HUMAN;H6VRG0_HUMAN;H6VRG1_HUMAN;H6VRG3_HUMAN;K2C1_HUMAN	SLNNQFASFIDKVR	186;186;187;186;186	_SLNNQFASFIDKVR_.3	_SLNNQFASFIDKVR_	1.36446e+06	239865	1.56845e+06
H6VRF8;H6VRG0;H6VRG1;H6VRG3;P04264	H6VRF8;H6VRG0;H6VRG1;H6VRG3;P04264	KRT1	H6VRF8_HUMAN;H6VRG0_HUMAN;H6VRG1_HUMAN;H6VRG3_HUMAN;K2C1_HUMAN	SLNNQFASFIDKVR	186;186;187;186;186	_SLNNQFASFIDKVR_.2	_SLNNQFASFIDKVR_	1.36446e+06	239865	1.56845e+06
H6VRF8;H6VRG0;H6VRG1;H6VRG3;P04264	H6VRF8;H6VRG0;H6VRG1;H6VRG3;P04264	KRT1	H6VRF8_HUMAN;H6VRG0_HUMAN;H6VRG1_HUMAN;H6VRG3_HUMAN;K2C1_HUMAN	SLDLDSIIAEVK	344;344;345;344;344	_SLDLDSIIAEVK_.2	_SLDLDSIIAEVK_	2.17352e+06	854402	2.22322e+06
H6VRF8;H6VRG0;H6VRG1;H6VRG3;P04264	H6VRF8;H6VRG0;H6VRG1;H6VRG3;P04264	KRT1	H6VRF8_HUMAN;H6VRG0_HUMAN;H6VRG1_HUMAN;H6VRG3_HUMAN;K2C1_HUMAN	SLDLDSIIAEVK	344;344;345;344;344	_SLDLDSIIAEVK_.3	_SLDLDSIIAEVK_	2.17352e+06	854402	2.22322e+06
H6VRF8;H6VRG0;H6VRG1;H6VRG3;P04264	H6VRF8;H6VRG0;H6VRG1;H6VRG3;P04264	KRT1	H6VRF8_HUMAN;H6VRG0_HUMAN;H6VRG1_HUMAN;H6VRG3_HUMAN;K2C1_HUMAN	NMQDMVEDYR	258;258;259;258;258	_NMQDMVEDYR_.2	_NMQDMVEDYR_	0	117805	81776.5
H6VRF8;H6VRG0;H6VRG1;H6VRG3;P04264	H6VRF8;H6VRG0;H6VRG1;H6VRG3;P04264	KRT1	H6VRF8_HUMAN;H6VRG0_HUMAN;H6VRG1_HUMAN;H6VRG3_HUMAN;K2C1_HUMAN	NMQDMVEDYR	258;258;259;258;258	_NM[Oxidation (M)]QDM[Oxidation (M)]VEDYR_.2	_NM[+16]QDM[+16]VEDYR_	0	117805	81776.5
H6VRF8;H6VRG0;H6VRG1;H6VRG3;P04264	H6VRF8;H6VRG0;H6VRG1;H6VRG3;P04264	KRT1	H6VRF8_HUMAN;H6VRG0_HUMAN;H6VRG1_HUMAN;H6VRG3_HUMAN;K2C1_HUMAN	NMQDMVEDYR	258;258;259;258;258	_NMQDM[Oxidation (M)]VEDYR_.2	_NMQDM[+16]VEDYR_	0	117805	81776.5
H6VRF8;H6VRG0;H6VRG1;H6VRG3;P04264	H6VRF8;H6VRG0;H6VRG1;H6VRG3;P04264	KRT1	H6VRF8_HUMAN;H6VRG0_HUMAN;H6VRG1_HUMAN;H6VRG3_HUMAN;K2C1_HUMAN	GENALKDAK	433;433;434;433;433	_GENALKDAK_.2	_GENALKDAK_	598878	837598	499470
H7BYY1	H7BYY1	TPM1	H7BYY1_HUMAN	SLQEQADAAEER	16	_SLQEQADAAEER_.2	_SLQEQADAAEER_	131081	178959	97670.4
H7BYY1	H7BYY1	TPM1	H7BYY1_HUMAN	AGSSSLEAVR	2	_[Acetyl (Protein N-term)]AGSSSLEAVR_.2	_[+42]AGSSSLEAVR_	148021	325482	250466
H7BYY1	H7BYY1	TPM1	H7BYY1_HUMAN	ETAEADVASLNR	43	_ETAEADVASLNR_.2	_ETAEADVASLNR_	63638.5	0	0
H7BYY1	H7BYY1	TPM1	H7BYY1_HUMAN	ETAEADVASLNRR	43	_ETAEADVASLNRR_.3	_ETAEADVASLNRR_	0	0	104571
H9ZYJ2;P10599	H9ZYJ2;P10599	TXN	H9ZYJ2_HUMAN;THIO_HUMAN	VGEFSGANK	86;86	_VGEFSGANK_.2	_VGEFSGANK_	131764	323097	217631
H9ZYJ2;P10599	H9ZYJ2;P10599	TXN	H9ZYJ2_HUMAN;THIO_HUMAN	VGEFSGANK	86;86	_VGEFSGANK_.1	_VGEFSGANK_	131764	323097	217631
H9ZYJ2;P10599	H9ZYJ2;P10599	TXN	H9ZYJ2_HUMAN;THIO_HUMAN	CMPTFQFFK	73;73	_C[Carbamidomethyl (C)]MPTFQFFK_.2	_C[+57]MPTFQFFK_	1	0	0
J3KRE2;J3KTF8;J3QQX2;P52565;V9HWE8	J3KRE2;J3KTF8;J3QQX2;P52565;V9HWE8	ARHGDIA;ARHGDIA;ARHGDIA;ARHGDIA;HEL-S-47e	J3KRE2_HUMAN;J3KTF8_HUMAN;J3QQX2_HUMAN;GDIR1_HUMAN;V9HWE8_HUMAN	SIQEIQELDKDDESLR	34;34;34;34;34	_SIQEIQELDKDDESLR_.3	_SIQEIQELDKDDESLR_	1.00734e+06	0	0
J3KRE2;J3KTF8;J3QQX2;P52565;V9HWE8	J3KRE2;J3KTF8;J3QQX2;P52565;V9HWE8	ARHGDIA;ARHGDIA;ARHGDIA;ARHGDIA;HEL-S-47e	J3KRE2_HUMAN;J3KTF8_HUMAN;J3QQX2_HUMAN;GDIR1_HUMAN;V9HWE8_HUMAN	SIQEIQELDKDDESLR	34;34;34;34;34	_SIQEIQELDKDDESLR_.2	_SIQEIQELDKDDESLR_	1.00734e+06	0	0
M0QYR6;M0R0H5;M0R1I2;M0R2E9;Q03405;Q9UPI5	M0QYR6;M0R0H5;M0R1I2;M0R2E9;Q03405;Q9UPI5	PLAUR	M0QYR6_HUMAN;M0R0H5_HUMAN;M0R1I2_HUMAN;M0R2E9_HUMAN;UPAR_HUMAN;Q9UPI5_HUMAN	VEECALGQDLCR	11;11;36;31;36;36	_VEEC[Carbamidomethyl (C)]ALGQDLC[Carbamidomethyl (C)]R_.2	_VEEC[+57]ALGQDLC[+57]R_	0	0	22491.3
M1VE83;M1VKI3;P31431	M1VE83;M1VKI3;P31431	SDC4-ROS1_S4;R34;SDC4-ROS1_S4;R32;SDC4	M1VE83_HUMAN;M1VKI3_HUMAN;SDC4_HUMAN	ETEVIDPQDLLEGR	23;23;23	_ETEVIDPQDLLEGR_.2	_ETEVIDPQDLLEGR_	2.90288e+06	3.41777e+06	1439539
M1VE83;M1VKI3;P31431	M1VE83;M1VKI3;P31431	SDC4-ROS1_S4;R34;SDC4-ROS1_S4;R32;SDC4	M1VE83_HUMAN;M1VKI3_HUMAN;SDC4_HUMAN	AGSGSQVPTEPK	93;93;93	_AGSGSQVPTEPK_.2	_AGSGSQVPTEPK_	1.14988e+06	2.39933e+06	2.30751e+06
O00461	O00461	GOLIM4	GOLI4_HUMAN	FQSPYEEQLEQQR	403	_FQSPYEEQLEQQR_.2	_FQSPYEEQLEQQR_	1.03197e+06	0	0
O14828;Q6FHJ5	O14828;Q6FHJ5	SCAMP3	SCAM3_HUMAN;Q6FHJ5_HUMAN	DGGNPFAEPSELDNPFQDPAVIQHRPSR	6;6	_DGGNPFAEPSELDNPFQDPAVIQHRPSR_.4	_DGGNPFAEPSELDNPFQDPAVIQHRPSR_	1	149592	811944
O60271	O60271	SPAG9	JIP4_HUMAN	DVLQGELEAVK	446	_DVLQGELEAVK_.2	_DVLQGELEAVK_	0	1.34073e+06	0
O75506	O75506	HSBP1	HSBP1_HUMAN	NIADLMTQAGVEELESENKIPATQK	51	_NIADLMTQAGVEELESENKIPATQK_.3	_NIADLMTQAGVEELESENKIPATQK_	0	0	153822
O75506	O75506	HSBP1	HSBP1_HUMAN	NIADLMTQAGVEELESENK	51	_NIADLMTQAGVEELESENK_.3	_NIADLMTQAGVEELESENK_	0	0	59310.5
P02452	P02452	COL1A1	CO1A1_HUMAN	DGEAGAQGPPGPAGPAGER	613	_DGEAGAQGPPGPAGPAGER_.2	_DGEAGAQGPPGPAGPAGER_	1.13599e+06	560693	1.42863e+06
P02452	P02452	COL1A1	CO1A1_HUMAN	GFSGLDGAK	269	_GFSGLDGAK_.2	_GFSGLDGAK_	270212	812726	243186
P02452	P02452	COL1A1	CO1A1_HUMAN	GPAGPQGPR	1085	_GPAGPQGPR_.2	_GPAGPQGPR_	666971	494427	326880
P02452	P02452	COL1A1	CO1A1_HUMAN	VLCDDVICDETK	68	_VLC[Carbamidomethyl (C)]DDVIC[Carbamidomethyl (C)]DETK_.2	_VLC[+57]DDVIC[+57]DETK_	911475	2.03153e+06	258177
P02452	P02452	COL1A1	CO1A1_HUMAN	GVQGPPGPAGPR	686	_GVQGPPGPAGPR_.2	_GVQGPPGPAGPR_	1.79541	1.2747	4.04021
P02452	P02452	COL1A1	CO1A1_HUMAN	GSEGPQGVR	362	_GSEGPQGVR_.2	_GSEGPQGVR_	333347	165755	145586
P02452	P02452	COL1A1	CO1A1_HUMAN	DVWKPEPCR	51	_DVWKPEPC[Carbamidomethyl (C)]R_.3	_DVWKPEPC[+57]R_	128928	1.03174e+06	233548
P02452	P02452	COL1A1	CO1A1_HUMAN	DVWKPEPCR	51	_DVWKPEPC[Carbamidomethyl (C)]R_.2	_DVWKPEPC[+57]R_	128928	1.03174e+06	233548
P02452	P02452	COL1A1	CO1A1_HUMAN	YHDRDVWKPEPCR	47	_YHDRDVWKPEPC[Carbamidomethyl (C)]R_.4	_YHDRDVWKPEPC[+57]R_	247339	72731.9	454243
P02452	P02452	COL1A1	CO1A1_HUMAN	SGDRGETGPAGPAGPVGPVGAR	1063	_SGDRGETGPAGPAGPVGPVGAR_.3	_SGDRGETGPAGPAGPVGPVGAR_	304656	542871	279166
P02452	P02452	COL1A1	CO1A1_HUMAN	GVPGPPGAVGPAGK	599	_GVPGPPGAVGPAGK_.2	_GVPGPPGAVGPAGK_	47616.6	360255	0
P02452	P02452	COL1A1	CO1A1_HUMAN	ICVCDNGK	60	_IC[Carbamidomethyl (C)]VC[Carbamidomethyl (C)]DNGK_.2	_IC[+57]VC[+57]DNGK_	27719.8	86012.9	34436.2
P02452	P02452	COL1A1	CO1A1_HUMAN	GRPGAPGPAGAR	311	_GRPGAPGPAGAR_.3	_GRPGAPGPAGAR_	413725	708519	189678
P02452	P02452	COL1A1	CO1A1_HUMAN	GRPGAPGPAGAR	311	_GRPGAPGPAGAR_.2	_GRPGAPGPAGAR_	413725	708519	189678
P02452	P02452	COL1A1	CO1A1_HUMAN	GVVGLPGQR	959	_GVVGLPGQR_.2	_GVVGLPGQR_	0	75678.6	0
P02461	P02461	COL3A1	CO3A1_HUMAN	DGNPGSDGLPGR	1013	_DGNPGSDGLPGR_.2	_DGNPGSDGLPGR_	946108	522353	2.71903e+06
P02533	P02533	KRT14	K1C14_HUMAN	APSTYGGGLSVSSSR	42	_APSTYGGGLSVSSSR_.2	_APSTYGGGLSVSSSR_	6427261	9251062	6.13276e+06
P02533	P02533	KRT14	K1C14_HUMAN	DAEEWFFTK	301	_DAEEWFFTK_.2	_DAEEWFFTK_	3.04181e+06	843454	4.30768e+06
P02768	P02768	ALB	ALBU_HUMAN	FQNALLVR	427	_FQNALLVR_.2	_FQNALLVR_	1309426176	1688963328	1479150080
P02768	P02768	ALB	ALBU_HUMAN	FQNALLVR	427	_FQNALLVR_.1	_FQNALLVR_	1309426176	1688963328	1479150080
P02768	P02768	ALB	ALBU_HUMAN	KVPQVSTPTLVEVSR	438	_KVPQVSTPTLVEVSR_.3	_KVPQVSTPTLVEVSR_	1997889408	2891801088	2607432960
P02768	P02768	ALB	ALBU_HUMAN	KVPQVSTPTLVEVSR	438	_KVPQVSTPTLVEVSR_.2	_KVPQVSTPTLVEVSR_	1997889408	2891801088	2607432960
P02768	P02768	ALB	ALBU_HUMAN	YLYEIAR	162	_YLYEIAR_.2	_YLYEIAR_	743772672	136209376	259488576
P02768	P02768	ALB	ALBU_HUMAN	YLYEIAR	162	_YLYEIAR_.1	_YLYEIAR_	743772672	136209376	259488576
P02768	P02768	ALB	ALBU_HUMAN	LVNEVTEFAK	66	_LVNEVTEFAK_.2	_LVNEVTEFAK_	3342072576	4363198976	3466242304
P02768	P02768	ALB	ALBU_HUMAN	LCTVATLR	98	_LC[Carbamidomethyl (C)]TVATLR_.2	_LC[+57]TVATLR_	253472640	797738368	986372800
P02768	P02768	ALB	ALBU_HUMAN	LCTVATLR	98	_LC[Carbamidomethyl (C)]TVATLR_.1	_LC[+57]TVATLR_	253472640	797738368	986372800
P02768	P02768	ALB	ALBU_HUMAN	RHPDYSVVLLLR	361	_RHPDYSVVLLLR_.3	_RHPDYSVVLLLR_	502957664	607959936	407428224
P02768	P02768	ALB	ALBU_HUMAN	RHPDYSVVLLLR	361	_RHPDYSVVLLLR_.2	_RHPDYSVVLLLR_	502957664	607959936	407428224
P02768	P02768	ALB	ALBU_HUMAN	RHPDYSVVLLLR	361	_RHPDYSVVLLLR_.4	_RHPDYSVVLLLR_	502957664	607959936	407428224
P02768	P02768	ALB	ALBU_HUMAN	QTALVELVK	550	_QTALVELVK_.2	_QTALVELVK_	2465258496	2394553600	2122204672
P02768	P02768	ALB	ALBU_HUMAN	QTALVELVK	550	_QTALVELVK_.1	_QTALVELVK_	2465258496	2394553600	2122204672
P02768	P02768	ALB	ALBU_HUMAN	LVTDLTK	258	_LVTDLTK_.2	_LVTDLTK_	132490568	660225344	149379216
P02768	P02768	ALB	ALBU_HUMAN	LVTDLTK	258	_LVTDLTK_.1	_LVTDLTK_	132490568	660225344	149379216
P02768	P02768	ALB	ALBU_HUMAN	LDELRDEGK	206	_LDELRDEGK_.3	_LDELRDEGK_	117101264	161349680	233525440
P02768	P02768	ALB	ALBU_HUMAN	LDELRDEGK	206	_LDELRDEGK_.2	_LDELRDEGK_	117101264	161349680	233525440
P02768	P02768	ALB	ALBU_HUMAN	RPCFSALEVDETYVPK	509	_RPC[Carbamidomethyl (C)]FSALEVDETYVPK_.3	_RPC[+57]FSALEVDETYVPK_	1111830656	1475816192	639826112
P02768	P02768	ALB	ALBU_HUMAN	RPCFSALEVDETYVPK	509	_RPC[Carbamidomethyl (C)]FSALEVDETYVPK_.2	_RPC[+57]FSALEVDETYVPK_	1111830656	1475816192	639826112
P02768	P02768	ALB	ALBU_HUMAN	CCTESLVNR	500	_C[Carbamidomethyl (C)]C[Carbamidomethyl (C)]TESLVNR_.2	_C[+57]C[+57]TESLVNR_	217844112	193391472	557289728
P02768	P02768	ALB	ALBU_HUMAN	AEFAEVSK	250	_AEFAEVSK_.2	_AEFAEVSK_	127843456	82555888	497813472
P02768	P02768	ALB	ALBU_HUMAN	AEFAEVSK	250	_AEFAEVSK_.1	_AEFAEVSK_	127843456	82555888	497813472
P02768	P02768	ALB	ALBU_HUMAN	ADDKETCFAEEGKK	585	_ADDKETC[Carbamidomethyl (C)]FAEEGKK_.3	_ADDKETC[+57]FAEEGKK_	524259424	569714368	583079296
P02768	P02768	ALB	ALBU_HUMAN	ADDKETCFAEEGKK	585	_ADDKETC[Carbamidomethyl (C)]FAEEGKK_.4	_ADDKETC[+57]FAEEGKK_	524259424	569714368	583079296
P02768	P02768	ALB	ALBU_HUMAN	ADDKETCFAEEGKK	585	_ADDKETC[Carbamidomethyl (C)]FAEEGKK_.2	_ADDKETC[+57]FAEEGKK_	524259424	569714368	583079296
P02768	P02768	ALB	ALBU_HUMAN	YICENQDSISSK	287	_YIC[Carbamidomethyl (C)]ENQDSISSK_.2	_YIC[+57]ENQDSISSK_	221866176	134650880	661057536
P02768	P02768	ALB	ALBU_HUMAN	DDNPNLPR	131	_DDNPNLPR_.2	_DDNPNLPR_	69391080	51748796	209937296
P02768	P02768	ALB	ALBU_HUMAN	DDNPNLPR	131	_DDNPNLPR_.1	_DDNPNLPR_	69391080	51748796	209937296
P02768	P02768	ALB	ALBU_HUMAN	AACLLPK	199	_AAC[Carbamidomethyl (C)]LLPK_.2	_AAC[+57]LLPK_	221866208	308457344	264720768
P02768	P02768	ALB	ALBU_HUMAN	AACLLPK	199	_AAC[Carbamidomethyl (C)]LLPK_.1	_AAC[+57]LLPK_	221866208	308457344	264720768
P02768	P02768	ALB	ALBU_HUMAN	TYETTLEK	376	_TYETTLEK_.2	_TYETTLEK_	148269280	110830976	379610208
P02768	P02768	ALB	ALBU_HUMAN	TYETTLEK	376	_TYETTLEK_.1	_TYETTLEK_	148269280	110830976	379610208
P02768	P02768	ALB	ALBU_HUMAN	FKDLGEENFK	35	_FKDLGEENFK_.3	_FKDLGEENFK_	225788848	307972224	266294128
P02768	P02768	ALB	ALBU_HUMAN	FKDLGEENFK	35	_FKDLGEENFK_.2	_FKDLGEENFK_	225788848	307972224	266294128
P02768	P02768	ALB	ALBU_HUMAN	AAFTECCQAADK	187	_AAFTEC[Carbamidomethyl (C)]C[Carbamidomethyl (C)]QAADK_.2	_AAFTEC[+57]C[+57]QAADK_	231656448	216927248	677716096
P02768	P02768	ALB	ALBU_HUMAN	VPQVSTPTLVEVSR	439	_VPQVSTPTLVEVSR_.2	_VPQVSTPTLVEVSR_	232108240	309443488	84255520
P02768	P02768	ALB	ALBU_HUMAN	VPQVSTPTLVEVSR	439	_VPQVSTPTLVEVSR_.3	_VPQVSTPTLVEVSR_	232108240	309443488	84255520
P02768	P02768	ALB	ALBU_HUMAN	VHTECCHGDLLECADDRADLAK	265	_VHTEC[Carbamidomethyl (C)]C[Carbamidomethyl (C)]HGDLLEC[Carbamidomethyl (C)]ADDRADLAK_.4	_VHTEC[+57]C[+57]HGDLLEC[+57]ADDRADLAK_	11878641	42616100	53513544
P02768	P02768	ALB	ALBU_HUMAN	VHTECCHGDLLECADDRADLAK	265	_VHTEC[Carbamidomethyl (C)]C[Carbamidomethyl (C)]HGDLLEC[Carbamidomethyl (C)]ADDRADLAK_.3	_VHTEC[+57]C[+57]HGDLLEC[+57]ADDRADLAK_	11878641	42616100	53513544
P02768	P02768	ALB	ALBU_HUMAN	VHTECCHGDLLECADDRADLAK	265	_VHTEC[Carbamidomethyl (C)]C[Carbamidomethyl (C)]HGDLLEC[Carbamidomethyl (C)]ADDRADLAK_.5	_VHTEC[+57]C[+57]HGDLLEC[+57]ADDRADLAK_	11878641	42616100	53513544
P02768	P02768	ALB	ALBU_HUMAN	SLHTLFGDK	89	_SLHTLFGDK_.2	_SLHTLFGDK_	89284976	145323888	31937430
P02768	P02768	ALB	ALBU_HUMAN	VFDEFKPLVEEPQNLIK	397	_VFDEFKPLVEEPQNLIK_.3	_VFDEFKPLVEEPQNLIK_	260631520	477766944	286366528
P02768	P02768	ALB	ALBU_HUMAN	ALVLIAFAQYLQQCPFEDHVK	45	_ALVLIAFAQYLQQC[Carbamidomethyl (C)]PFEDHVK_.3	_ALVLIAFAQYLQQC[+57]PFEDHVK_	66187960	69110976	42702672
P02768	P02768	ALB	ALBU_HUMAN	ALVLIAFAQYLQQCPFEDHVK	45	_ALVLIAFAQYLQQC[Carbamidomethyl (C)]PFEDHVK_.4	_ALVLIAFAQYLQQC[+57]PFEDHVK_	66187960	69110976	42702672
P02768	P02768	ALB	ALBU_HUMAN	VHTECCHGDLLECADDR	265	_VHTEC[Carbamidomethyl (C)]C[Carbamidomethyl (C)]HGDLLEC[Carbamidomethyl (C)]ADDR_.3	_VHTEC[+57]C[+57]HGDLLEC[+57]ADDR_	32414176	25355918	15369450
P02768	P02768	ALB	ALBU_HUMAN	VHTECCHGDLLECADDR	265	_VHTEC[Carbamidomethyl (C)]C[Carbamidomethyl (C)]HGDLLEC[Carbamidomethyl (C)]ADDR_.4	_VHTEC[+57]C[+57]HGDLLEC[+57]ADDR_	32414176	25355918	15369450
P02768	P02768	ALB	ALBU_HUMAN	AVMDDFAAFVEK	570	_AVMDDFAAFVEK_.2	_AVMDDFAAFVEK_	60821148	85305464	75357208
P02768	P02768	ALB	ALBU_HUMAN	AVMDDFAAFVEK	570	_AVM[Oxidation (M)]DDFAAFVEK_.2	_AVM[+16]DDFAAFVEK_	60821148	85305464	75357208
P02768	P02768	ALB	ALBU_HUMAN	AVMDDFAAFVEK	570	_AVMDDFAAFVEK_.3	_AVMDDFAAFVEK_	60821148	85305464	75357208
P02768	P02768	ALB	ALBU_HUMAN	AVMDDFAAFVEK	570	_AVM[Oxidation (M)]DDFAAFVEK_.3	_AVM[+16]DDFAAFVEK_	60821148	85305464	75357208
P02768	P02768	ALB	ALBU_HUMAN	ETYGEMADCCAK	106	_ETYGEMADC[Carbamidomethyl (C)]C[Carbamidomethyl (C)]AK_.2	_ETYGEMADC[+57]C[+57]AK_	9158906	7078213	22316390
P02768	P02768	ALB	ALBU_HUMAN	ETYGEMADCCAK	106	_ETYGEM[Oxidation (M)]ADC[Carbamidomethyl (C)]C[Carbamidomethyl (C)]AK_.2	_ETYGEM[+16]ADC[+57]C[+57]AK_	9158906	7078213	22316390
P02768	P02768	ALB	ALBU_HUMAN	QNCELFEQLGEYK	414	_QNC[Carbamidomethyl (C)]ELFEQLGEYK_.2	_QNC[+57]ELFEQLGEYK_	39161480	33347496	46088644
P02768	P02768	ALB	ALBU_HUMAN	QNCELFEQLGEYK	414	_QNC[Carbamidomethyl (C)]ELFEQLGEYK_.3	_QNC[+57]ELFEQLGEYK_	39161480	33347496	46088644
P02768	P02768	ALB	ALBU_HUMAN	RHPYFYAPELLFFAK	169	_RHPYFYAPELLFFAK_.3	_RHPYFYAPELLFFAK_	21642042	29450412	24177724
P02768	P02768	ALB	ALBU_HUMAN	RHPYFYAPELLFFAK	169	_RHPYFYAPELLFFAK_.2	_RHPYFYAPELLFFAK_	21642042	29450412	24177724
P02768	P02768	ALB	ALBU_HUMAN	RHPYFYAPELLFFAK	169	_RHPYFYAPELLFFAK_.4	_RHPYFYAPELLFFAK_	21642042	29450412	24177724
P02768	P02768	ALB	ALBU_HUMAN	TCVADESAENCDK	76	_TC[Carbamidomethyl (C)]VADESAENC[Carbamidomethyl (C)]DK_.2	_TC[+57]VADESAENC[+57]DK_	82008232	81521568	92589296
P02768	P02768	ALB	ALBU_HUMAN	EFNAETFTFHADICTLSEK	525	_EFNAETFTFHADIC[Carbamidomethyl (C)]TLSEK_.3	_EFNAETFTFHADIC[+57]TLSEK_	342609600	102889488	348324352
P02768	P02768	ALB	ALBU_HUMAN	LKECCEKPLLEK	299	_LKEC[Carbamidomethyl (C)]C[Carbamidomethyl (C)]EKPLLEK_.3	_LKEC[+57]C[+57]EKPLLEK_	76160640	57941708	168872960
P02768	P02768	ALB	ALBU_HUMAN	LKECCEKPLLEK	299	_LKEC[Carbamidomethyl (C)]C[Carbamidomethyl (C)]EKPLLEK_.4	_LKEC[+57]C[+57]EKPLLEK_	76160640	57941708	168872960
P02768	P02768	ALB	ALBU_HUMAN	LKECCEKPLLEK	299	_LKEC[Carbamidomethyl (C)]C[Carbamidomethyl (C)]EKPLLEK_.2	_LKEC[+57]C[+57]EKPLLEK_	76160640	57941708	168872960
P02768	P02768	ALB	ALBU_HUMAN	KQTALVELVK	549	_KQTALVELVK_.2	_KQTALVELVK_	126670544	137565920	65438744
P02768	P02768	ALB	ALBU_HUMAN	KQTALVELVK	549	_KQTALVELVK_.3	_KQTALVELVK_	126670544	137565920	65438744
P02768	P02768	ALB	ALBU_HUMAN	QEPERNECFLQHKDDNPNLPR	118	_QEPERNEC[Carbamidomethyl (C)]FLQHKDDNPNLPR_.4	_QEPERNEC[+57]FLQHKDDNPNLPR_	4738057	25804986	5.01973e+06
P02768	P02768	ALB	ALBU_HUMAN	QEPERNECFLQHKDDNPNLPR	118	_QEPERNEC[Carbamidomethyl (C)]FLQHKDDNPNLPR_.5	_QEPERNEC[+57]FLQHKDDNPNLPR_	4738057	25804986	5.01973e+06
P02768	P02768	ALB	ALBU_HUMAN	QEPERNECFLQHKDDNPNLPR	118	_QEPERNEC[Carbamidomethyl (C)]FLQHKDDNPNLPR_.3	_QEPERNEC[+57]FLQHKDDNPNLPR_	4738057	25804986	5.01973e+06
P02768	P02768	ALB	ALBU_HUMAN	EFNAETFTFHADICTLSEKER	525	_EFNAETFTFHADIC[Carbamidomethyl (C)]TLSEKER_.4	_EFNAETFTFHADIC[+57]TLSEKER_	25748244	20670654	50240160
P02768	P02768	ALB	ALBU_HUMAN	EFNAETFTFHADICTLSEKER	525	_EFNAETFTFHADIC[Carbamidomethyl (C)]TLSEKER_.3	_EFNAETFTFHADIC[+57]TLSEKER_	25748244	20670654	50240160
P02768	P02768	ALB	ALBU_HUMAN	CCAAADPHECYAK	384	_C[Carbamidomethyl (C)]C[Carbamidomethyl (C)]AAADPHEC[Carbamidomethyl (C)]YAK_.3	_C[+57]C[+57]AAADPHEC[+57]YAK_	11431556	11361526	18946710
P02768	P02768	ALB	ALBU_HUMAN	CCAAADPHECYAK	384	_C[Carbamidomethyl (C)]C[Carbamidomethyl (C)]AAADPHEC[Carbamidomethyl (C)]YAK_.2	_C[+57]C[+57]AAADPHEC[+57]YAK_	11431556	11361526	18946710
P02768	P02768	ALB	ALBU_HUMAN	LVAASQAALGL	599	_LVAASQAALGL_.2	_LVAASQAALGL_	272678720	144857088	615102464
P02768	P02768	ALB	ALBU_HUMAN	DVFLGMFLYEYAR	348	_DVFLGM[Oxidation (M)]FLYEYAR_.2	_DVFLGM[+16]FLYEYAR_	11693971	11929351	8129055
P02768	P02768	ALB	ALBU_HUMAN	DVFLGMFLYEYAR	348	_DVFLGMFLYEYAR_.2	_DVFLGMFLYEYAR_	11693971	11929351	8129055
P02768	P02768	ALB	ALBU_HUMAN	DVFLGMFLYEYAR	348	_DVFLGMFLYEYAR_.3	_DVFLGMFLYEYAR_	11693971	11929351	8129055
P02768	P02768	ALB	ALBU_HUMAN	DVFLGMFLYEYAR	348	_DVFLGM[Oxidation (M)]FLYEYAR_.3	_DVFLGM[+16]FLYEYAR_	11693971	11929351	8129055
P02768	P02768	ALB	ALBU_HUMAN	HPYFYAPELLFFAK	170	_HPYFYAPELLFFAK_.3	_HPYFYAPELLFFAK_	11683420	5843717	17937960
P02768	P02768	ALB	ALBU_HUMAN	HPYFYAPELLFFAK	170	_HPYFYAPELLFFAK_.2	_HPYFYAPELLFFAK_	11683420	5843717	17937960
P02768	P02768	ALB	ALBU_HUMAN	DLGEENFK	37	_DLGEENFK_.2	_DLGEENFK_	19124228	55737912	19413352
P02768	P02768	ALB	ALBU_HUMAN	DLGEENFK	37	_DLGEENFK_.1	_DLGEENFK_	19124228	55737912	19413352
P02768	P02768	ALB	ALBU_HUMAN	RMPCAEDYLSVVLNQLCVLHEK	469	_RMPC[Carbamidomethyl (C)]AEDYLSVVLNQLC[Carbamidomethyl (C)]VLHEK_.3	_RMPC[+57]AEDYLSVVLNQLC[+57]VLHEK_	4.63577e+06	4.35224e+06	3.54871e+06
P02768	P02768	ALB	ALBU_HUMAN	RMPCAEDYLSVVLNQLCVLHEK	469	_RM[Oxidation (M)]PC[Carbamidomethyl (C)]AEDYLSVVLNQLC[Carbamidomethyl (C)]VLHEK_.4	_RM[+16]PC[+57]AEDYLSVVLNQLC[+57]VLHEK_	4.63577e+06	4.35224e+06	3.54871e+06
P02768	P02768	ALB	ALBU_HUMAN	RMPCAEDYLSVVLNQLCVLHEK	469	_RMPC[Carbamidomethyl (C)]AEDYLSVVLNQLC[Carbamidomethyl (C)]VLHEK_.4	_RMPC[+57]AEDYLSVVLNQLC[+57]VLHEK_	4.63577e+06	4.35224e+06	3.54871e+06
P02768	P02768	ALB	ALBU_HUMAN	RMPCAEDYLSVVLNQLCVLHEK	469	_RM[Oxidation (M)]PC[Carbamidomethyl (C)]AEDYLSVVLNQLC[Carbamidomethyl (C)]VLHEK_.3	_RM[+16]PC[+57]AEDYLSVVLNQLC[+57]VLHEK_	4.63577e+06	4.35224e+06	3.54871e+06
P02768	P02768	ALB	ALBU_HUMAN	KLVAASQAALGL	598	_KLVAASQAALGL_.2	_KLVAASQAALGL_	231876768	276762528	116454296
P02768	P02768	ALB	ALBU_HUMAN	ECCEKPLLEK	301	_EC[Carbamidomethyl (C)]C[Carbamidomethyl (C)]EKPLLEK_.3	_EC[+57]C[+57]EKPLLEK_	25174806	17176952	58178312
P02768	P02768	ALB	ALBU_HUMAN	ECCEKPLLEK	301	_EC[Carbamidomethyl (C)]C[Carbamidomethyl (C)]EKPLLEK_.2	_EC[+57]C[+57]EKPLLEK_	25174806	17176952	58178312
P02768	P02768	ALB	ALBU_HUMAN	QEPERNECFLQHK	118	_QEPERNEC[Carbamidomethyl (C)]FLQHK_.3	_QEPERNEC[+57]FLQHK_	9257329	3852054	6.55518e+06
P02768	P02768	ALB	ALBU_HUMAN	QEPERNECFLQHK	118	_QEPERNEC[Carbamidomethyl (C)]FLQHK_.4	_QEPERNEC[+57]FLQHK_	9257329	3852054	6.55518e+06
P02768	P02768	ALB	ALBU_HUMAN	QEPERNECFLQHK	118	_QEPERNEC[Carbamidomethyl (C)]FLQHK_.2	_QEPERNEC[+57]FLQHK_	9257329	3852054	6.55518e+06
P02768	P02768	ALB	ALBU_HUMAN	MPCAEDYLSVVLNQLCVLHEK	470	_MPC[Carbamidomethyl (C)]AEDYLSVVLNQLC[Carbamidomethyl (C)]VLHEK_.3	_MPC[+57]AEDYLSVVLNQLC[+57]VLHEK_	7744796	5661746	7139565
P02768	P02768	ALB	ALBU_HUMAN	MPCAEDYLSVVLNQLCVLHEK	470	_M[Oxidation (M)]PC[Carbamidomethyl (C)]AEDYLSVVLNQLC[Carbamidomethyl (C)]VLHEK_.3	_M[+16]PC[+57]AEDYLSVVLNQLC[+57]VLHEK_	7744796	5661746	7139565
P02768	P02768	ALB	ALBU_HUMAN	HPDYSVVLLLR	362	_HPDYSVVLLLR_.3	_HPDYSVVLLLR_	17044764	5492693	28814294
P02768	P02768	ALB	ALBU_HUMAN	HPDYSVVLLLR	362	_HPDYSVVLLLR_.2	_HPDYSVVLLLR_	17044764	5492693	28814294
P02768	P02768	ALB	ALBU_HUMAN	ADDKETCFAEEGK	585	_ADDKETC[Carbamidomethyl (C)]FAEEGK_.3	_ADDKETC[+57]FAEEGK_	14166840	13533780	11764631
P02768	P02768	ALB	ALBU_HUMAN	ADDKETCFAEEGK	585	_ADDKETC[Carbamidomethyl (C)]FAEEGK_.2	_ADDKETC[+57]FAEEGK_	14166840	13533780	11764631
P02768	P02768	ALB	ALBU_HUMAN	NECFLQHK	123	_NEC[Carbamidomethyl (C)]FLQHK_.2	_NEC[+57]FLQHK_	3.32518e+06	2007440	2318889
P02768	P02768	ALB	ALBU_HUMAN	NECFLQHK	123	_NEC[Carbamidomethyl (C)]FLQHK_.3	_NEC[+57]FLQHK_	3.32518e+06	2007440	2318889
P02768	P02768	ALB	ALBU_HUMAN	ETCFAEEGKK	589	_ETC[Carbamidomethyl (C)]FAEEGKK_.3	_ETC[+57]FAEEGKK_	16251577	12562720	14360180
P02768	P02768	ALB	ALBU_HUMAN	ETCFAEEGKK	589	_ETC[Carbamidomethyl (C)]FAEEGKK_.2	_ETC[+57]FAEEGKK_	16251577	12562720	14360180
P02768	P02768	ALB	ALBU_HUMAN	VTKCCTESLVNR	497	_VTKC[Carbamidomethyl (C)]C[Carbamidomethyl (C)]TESLVNR_.3	_VTKC[+57]C[+57]TESLVNR_	649485	687833	442102
P02768	P02768	ALB	ALBU_HUMAN	VTKCCTESLVNR	497	_VTKC[Carbamidomethyl (C)]C[Carbamidomethyl (C)]TESLVNR_.2	_VTKC[+57]C[+57]TESLVNR_	649485	687833	442102
P02768	P02768	ALB	ALBU_HUMAN	PCFSALEVDETYVPK	510	_PC[Carbamidomethyl (C)]FSALEVDETYVPK_.2	_PC[+57]FSALEVDETYVPK_	535305	528133	1.99926e+06
P02768	P02768	ALB	ALBU_HUMAN	ETCFAEEGK	589	_ETC[Carbamidomethyl (C)]FAEEGK_.2	_ETC[+57]FAEEGK_	46887	22715.8	700.818
P02768	P02768	ALB	ALBU_HUMAN	LVRPEVDVMCTAFHDNEETFLKK	139	_LVRPEVDVMC[Carbamidomethyl (C)]TAFHDNEETFLKK_.5	_LVRPEVDVMC[+57]TAFHDNEETFLKK_	52599340	43740208	40562844
P02768	P02768	ALB	ALBU_HUMAN	LVRPEVDVMCTAFHDNEETFLKK	139	_LVRPEVDVMC[Carbamidomethyl (C)]TAFHDNEETFLKK_.4	_LVRPEVDVMC[+57]TAFHDNEETFLKK_	52599340	43740208	40562844
P02768	P02768	ALB	ALBU_HUMAN	LVRPEVDVMCTAFHDNEETFLKK	139	_LVRPEVDVMC[Carbamidomethyl (C)]TAFHDNEETFLKK_.3	_LVRPEVDVMC[+57]TAFHDNEETFLKK_	52599340	43740208	40562844
P02768	P02768	ALB	ALBU_HUMAN	LVRPEVDVMCTAFHDNEETFLKK	139	_LVRPEVDVM[Oxidation (M)]C[Carbamidomethyl (C)]TAFHDNEETFLKK_.5	_LVRPEVDVM[+16]C[+57]TAFHDNEETFLKK_	52599340	43740208	40562844
P02768	P02768	ALB	ALBU_HUMAN	LVRPEVDVMCTAFHDNEETFLKK	139	_LVRPEVDVM[Oxidation (M)]C[Carbamidomethyl (C)]TAFHDNEETFLKK_.4	_LVRPEVDVM[+16]C[+57]TAFHDNEETFLKK_	52599340	43740208	40562844
P02768	P02768	ALB	ALBU_HUMAN	LVRPEVDVMCTAFHDNEETFLKK	139	_LVRPEVDVM[Oxidation (M)]C[Carbamidomethyl (C)]TAFHDNEETFLKK_.3	_LVRPEVDVM[+16]C[+57]TAFHDNEETFLKK_	52599340	43740208	40562844
P02768	P02768	ALB	ALBU_HUMAN	SLHTLFGDKLCTVATLR	89	_SLHTLFGDKLC[Carbamidomethyl (C)]TVATLR_.4	_SLHTLFGDKLC[+57]TVATLR_	60806036	55366164	59873800
P02768	P02768	ALB	ALBU_HUMAN	SLHTLFGDKLCTVATLR	89	_SLHTLFGDKLC[Carbamidomethyl (C)]TVATLR_.3	_SLHTLFGDKLC[+57]TVATLR_	60806036	55366164	59873800
P02768	P02768	ALB	ALBU_HUMAN	SLHTLFGDKLCTVATLR	89	_SLHTLFGDKLC[Carbamidomethyl (C)]TVATLR_.2	_SLHTLFGDKLC[+57]TVATLR_	60806036	55366164	59873800
P02768	P02768	ALB	ALBU_HUMAN	NECFLQHKDDNPNLPR	123	_NEC[Carbamidomethyl (C)]FLQHKDDNPNLPR_.4	_NEC[+57]FLQHKDDNPNLPR_	3.93645e+06	5414296	5886142
P02768	P02768	ALB	ALBU_HUMAN	NECFLQHKDDNPNLPR	123	_NEC[Carbamidomethyl (C)]FLQHKDDNPNLPR_.3	_NEC[+57]FLQHKDDNPNLPR_	3.93645e+06	5414296	5886142
P02768	P02768	ALB	ALBU_HUMAN	NECFLQHKDDNPNLPR	123	_NEC[Carbamidomethyl (C)]FLQHKDDNPNLPR_.2	_NEC[+57]FLQHKDDNPNLPR_	3.93645e+06	5414296	5886142
P02768	P02768	ALB	ALBU_HUMAN	LKCASLQK	222	_LKC[Carbamidomethyl (C)]ASLQK_.2	_LKC[+57]ASLQK_	1.58016e+06	961561	772980
P02768	P02768	ALB	ALBU_HUMAN	RPCFSALEVDETYVPKEFNAETFTFHADICTLSEK	509	_RPC[Carbamidomethyl (C)]FSALEVDETYVPKEFNAETFTFHADIC[Carbamidomethyl (C)]TLSEK_.5	_RPC[+57]FSALEVDETYVPKEFNAETFTFHADIC[+57]TLSEK_	146776	282708	232004
P02768	P02768	ALB	ALBU_HUMAN	SHCIAEVENDEMPADLPSLAADFVESK	311	_SHC[Carbamidomethyl (C)]IAEVENDEMPADLPSLAADFVESK_.3	_SHC[+57]IAEVENDEMPADLPSLAADFVESK_	1.53978e+06	1.16612e+06	1.87502e+06
P02768	P02768	ALB	ALBU_HUMAN	SHCIAEVENDEMPADLPSLAADFVESK	311	_SHC[Carbamidomethyl (C)]IAEVENDEM[Oxidation (M)]PADLPSLAADFVESK_.3	_SHC[+57]IAEVENDEM[+16]PADLPSLAADFVESK_	1.53978e+06	1.16612e+06	1.87502e+06
P02768	P02768	ALB	ALBU_HUMAN	SHCIAEVENDEMPADLPSLAADFVESK	311	_SHC[Carbamidomethyl (C)]IAEVENDEMPADLPSLAADFVESK_.4	_SHC[+57]IAEVENDEMPADLPSLAADFVESK_	1.53978e+06	1.16612e+06	1.87502e+06
P02768	P02768	ALB	ALBU_HUMAN	LVRPEVDVMCTAFHDNEETFLK	139	_LVRPEVDVMC[Carbamidomethyl (C)]TAFHDNEETFLK_.4	_LVRPEVDVMC[+57]TAFHDNEETFLK_	5785424	2540685	12455612
P02768	P02768	ALB	ALBU_HUMAN	LVRPEVDVMCTAFHDNEETFLK	139	_LVRPEVDVMC[Carbamidomethyl (C)]TAFHDNEETFLK_.3	_LVRPEVDVMC[+57]TAFHDNEETFLK_	5785424	2540685	12455612
P02768	P02768	ALB	ALBU_HUMAN	LVRPEVDVMCTAFHDNEETFLK	139	_LVRPEVDVM[Oxidation (M)]C[Carbamidomethyl (C)]TAFHDNEETFLK_.4	_LVRPEVDVM[+16]C[+57]TAFHDNEETFLK_	5785424	2540685	12455612
P02768	P02768	ALB	ALBU_HUMAN	LVRPEVDVMCTAFHDNEETFLK	139	_LVRPEVDVM[Oxidation (M)]C[Carbamidomethyl (C)]TAFHDNEETFLK_.3	_LVRPEVDVM[+16]C[+57]TAFHDNEETFLK_	5785424	2540685	12455612
P02768	P02768	ALB	ALBU_HUMAN	LAKTYETTLEK	373	_LAKTYETTLEK_.2	_LAKTYETTLEK_	617270	338839	1.93062e+06
P02768	P02768	ALB	ALBU_HUMAN	LAKTYETTLEK	373	_LAKTYETTLEK_.3	_LAKTYETTLEK_	617270	338839	1.93062e+06
P02768	P02768	ALB	ALBU_HUMAN	QNCELFEQLGEYKFQNALLVR	414	_QNC[Carbamidomethyl (C)]ELFEQLGEYKFQNALLVR_.3	_QNC[+57]ELFEQLGEYKFQNALLVR_	395401	240504	498531
P02768	P02768	ALB	ALBU_HUMAN	TPVSDRVTK	491	_TPVSDRVTK_.2	_TPVSDRVTK_	472151	392641	386828
P02768	P02768	ALB	ALBU_HUMAN	PLVEEPQNLIK	403	_PLVEEPQNLIK_.2	_PLVEEPQNLIK_	2181707	2.61909e+06	816742
P02768	P02768	ALB	ALBU_HUMAN	NYAEAKDVFLGMFLYEYAR	342	_NYAEAKDVFLGMFLYEYAR_.3	_NYAEAKDVFLGMFLYEYAR_	33964.7	7147.79	23013.7
P02768	P02768	ALB	ALBU_HUMAN	NYAEAKDVFLGMFLYEYAR	342	_NYAEAKDVFLGM[Oxidation (M)]FLYEYAR_.3	_NYAEAKDVFLGM[+16]FLYEYAR_	33964.7	7147.79	23013.7
P02768	P02768	ALB	ALBU_HUMAN	KYLYEIAR	161	_KYLYEIAR_.2	_KYLYEIAR_	4.50136e+06	9838278	15255840
P02768	P02768	ALB	ALBU_HUMAN	KYLYEIAR	161	_KYLYEIAR_.3	_KYLYEIAR_	4.50136e+06	9838278	15255840
P02768	P02768	ALB	ALBU_HUMAN	LSQRFPK	243	_LSQRFPK_.2	_LSQRFPK_	3242166	5.21521e+06	4.65408e+06
P02768	P02768	ALB	ALBU_HUMAN	RHPYFYAPELLFFAKR	169	_RHPYFYAPELLFFAKR_.4	_RHPYFYAPELLFFAKR_	3762241	1.92907e+06	1.81509e+06
P02768	P02768	ALB	ALBU_HUMAN	RHPYFYAPELLFFAKR	169	_RHPYFYAPELLFFAKR_.3	_RHPYFYAPELLFFAKR_	3762241	1.92907e+06	1.81509e+06
P02768	P02768	ALB	ALBU_HUMAN	DAHKSEVAHR	25	_DAHKSEVAHR_.3	_DAHKSEVAHR_	0	2.08582e+06	0
P02768	P02768	ALB	ALBU_HUMAN	DAHKSEVAHR	25	_DAHKSEVAHR_.2	_DAHKSEVAHR_	0	2.08582e+06	0
P02768	P02768	ALB	ALBU_HUMAN	AFKAWAVAR	234	_AFKAWAVAR_.2	_AFKAWAVAR_	323452	402674	307084
P02768	P02768	ALB	ALBU_HUMAN	FKDLGEENFKALVLIAFAQYLQQCPFEDHVK	35	_FKDLGEENFKALVLIAFAQYLQQC[Carbamidomethyl (C)]PFEDHVK_.5	_FKDLGEENFKALVLIAFAQYLQQC[+57]PFEDHVK_	255379	183115	178978
P02768	P02768	ALB	ALBU_HUMAN	FKDLGEENFKALVLIAFAQYLQQCPFEDHVK	35	_FKDLGEENFKALVLIAFAQYLQQC[Carbamidomethyl (C)]PFEDHVK_.4	_FKDLGEENFKALVLIAFAQYLQQC[+57]PFEDHVK_	255379	183115	178978
P02768	P02768	ALB	ALBU_HUMAN	AEFAEVSKLVTDLTK	250	_AEFAEVSKLVTDLTK_.3	_AEFAEVSKLVTDLTK_	146819	148070	180323
P02768	P02768	ALB	ALBU_HUMAN	AEFAEVSKLVTDLTK	250	_AEFAEVSKLVTDLTK_.2	_AEFAEVSKLVTDLTK_	146819	148070	180323
P02768	P02768	ALB	ALBU_HUMAN	LDELRDEGKASSAK	206	_LDELRDEGKASSAK_.3	_LDELRDEGKASSAK_	1.11433e+06	784488	1.3142e+06
P02768	P02768	ALB	ALBU_HUMAN	LDELRDEGKASSAK	206	_LDELRDEGKASSAK_.4	_LDELRDEGKASSAK_	1.11433e+06	784488	1.3142e+06
P02768	P02768	ALB	ALBU_HUMAN	LDELRDEGKASSAK	206	_LDELRDEGKASSAK_.2	_LDELRDEGKASSAK_	1.11433e+06	784488	1.3142e+06
P02768	P02768	ALB	ALBU_HUMAN	EQLKAVMDDFAAFVEK	566	_EQLKAVMDDFAAFVEK_.3	_EQLKAVMDDFAAFVEK_	102876	99400.1	109453
P02768	P02768	ALB	ALBU_HUMAN	EQLKAVMDDFAAFVEK	566	_EQLKAVMDDFAAFVEK_.2	_EQLKAVMDDFAAFVEK_	102876	99400.1	109453
P02768	P02768	ALB	ALBU_HUMAN	AVMDDFAAFVEKCCK	570	_AVMDDFAAFVEKC[Carbamidomethyl (C)]C[Carbamidomethyl (C)]K_.3	_AVMDDFAAFVEKC[+57]C[+57]K_	0	0	1.65675
P02768	P02768	ALB	ALBU_HUMAN	AVMDDFAAFVEKCCK	570	_AVMDDFAAFVEKC[Carbamidomethyl (C)]C[Carbamidomethyl (C)]K_.2	_AVMDDFAAFVEKC[+57]C[+57]K_	0	0	1.65675
P02768	P02768	ALB	ALBU_HUMAN	HPYFYAPELLFFAKR	170	_HPYFYAPELLFFAKR_.3	_HPYFYAPELLFFAKR_	0	0	259577
P02787;Q06AH7;Q53H26	P02787;Q06AH7;Q53H26	TF;TF;	TRFE_HUMAN;Q06AH7_HUMAN;Q53H26_HUMAN	ASYLDCIR	62;62;62	_ASYLDC[Carbamidomethyl (C)]IR_.2	_ASYLDC[+57]IR_	6027636	1.33101e+06	688725
P02787;Q06AH7;Q53H26	P02787;Q06AH7;Q53H26	TF;TF;	TRFE_HUMAN;Q06AH7_HUMAN;Q53H26_HUMAN	EDPQTFYYAVAVVK	108;108;108	_EDPQTFYYAVAVVK_.2	_EDPQTFYYAVAVVK_	921499	1.04617e+06	652523
P02787;Q06AH7;Q53H26	P02787;Q06AH7;Q53H26	TF;TF;	TRFE_HUMAN;Q06AH7_HUMAN;Q53H26_HUMAN	KASYLDCIR	61;61;61	_KASYLDC[Carbamidomethyl (C)]IR_.2	_KASYLDC[+57]IR_	99891	571573	251968
P02787;Q06AH7;Q53H26	P02787;Q06AH7;Q53H26	TF;TF;	TRFE_HUMAN;Q06AH7_HUMAN;Q53H26_HUMAN	EGYYGYTGAFR	531;531;531	_EGYYGYTGAFR_.2	_EGYYGYTGAFR_	2.0684e+06	1.77026e+06	1.44345e+06
P02787;Q06AH7;Q53H26	P02787;Q06AH7;Q53H26	TF;TF;	TRFE_HUMAN;Q06AH7_HUMAN;Q53H26_HUMAN	GDVAFVK	219,547;219,547;219,547	_GDVAFVK_.2	_GDVAFVK_	140931	588789	128799
P02787;Q06AH7;Q53H26	P02787;Q06AH7;Q53H26	TF;TF;	TRFE_HUMAN;Q06AH7_HUMAN;Q53H26_HUMAN	GDVAFVK	219,547;219,547;219,547	_GDVAFVK_.1	_GDVAFVK_	140931	588789	128799
P02787;Q06AH7;Q53H26	P02787;Q06AH7;Q53H26	TF;TF;	TRFE_HUMAN;Q06AH7_HUMAN;Q53H26_HUMAN	YLGEEYVK	669;669;669	_YLGEEYVK_.2	_YLGEEYVK_	0	218171	197213
P02787;Q06AH7;Q53H26	P02787;Q06AH7;Q53H26	TF;TF;	TRFE_HUMAN;Q06AH7_HUMAN;Q53H26_HUMAN	WCALSHHER	363;363;363	_WC[Carbamidomethyl (C)]ALSHHER_.3	_WC[+57]ALSHHER_	91392.3	100643	58684.2
P02787;Q06AH7;Q53H26	P02787;Q06AH7;Q53H26	TF;TF;	TRFE_HUMAN;Q06AH7_HUMAN;Q53H26_HUMAN	WCAVSEHEATK	27;27;27	_WC[Carbamidomethyl (C)]AVSEHEATK_.3	_WC[+57]AVSEHEATK_	292041	224454	150895
P02787;Q06AH7;Q53H26	P02787;Q06AH7;Q53H26	TF;TF;	TRFE_HUMAN;Q06AH7_HUMAN;Q53H26_HUMAN	WCAVSEHEATK	27;27;27	_WC[Carbamidomethyl (C)]AVSEHEATK_.2	_WC[+57]AVSEHEATK_	292041	224454	150895
P02787;Q06AH7;Q53H26	P02787;Q06AH7;Q53H26	TF;TF;	TRFE_HUMAN;Q06AH7_HUMAN;Q53H26_HUMAN	IECVSAETTEDCIAK	385;385;385	_IEC[Carbamidomethyl (C)]VSAETTEDC[Carbamidomethyl (C)]IAK_.2	_IEC[+57]VSAETTEDC[+57]IAK_	438250	418493	0
P02787;Q06AH7;Q53H26	P02787;Q06AH7;Q53H26	TF;TF;	TRFE_HUMAN;Q06AH7_HUMAN;Q53H26_HUMAN	FDEFFSEGCAPGSK	495;495;495	_FDEFFSEGC[Carbamidomethyl (C)]APGSK_.2	_FDEFFSEGC[+57]APGSK_	5.37401	0	0
P02787;Q06AH7;Q53H26	P02787;Q06AH7;Q53H26	TF;TF;	TRFE_HUMAN;Q06AH7_HUMAN;Q53H26_HUMAN	CSTSSLLEACTFR	684;684;684	_C[Carbamidomethyl (C)]STSSLLEAC[Carbamidomethyl (C)]TFR_.2	_C[+57]STSSLLEAC[+57]TFR_	0	0	2.38242
P02787;Q06AH7;Q53H26	P02787;Q06AH7;Q53H26	TF;TF;	TRFE_HUMAN;Q06AH7_HUMAN;Q53H26_HUMAN	APNHAVVTR	601;601;601	_APNHAVVTR_.2	_APNHAVVTR_	65037.2	133333	49263.4
P02787;Q06AH7;Q53H26	P02787;Q06AH7;Q53H26	TF;TF;	TRFE_HUMAN;Q06AH7_HUMAN;Q53H26_HUMAN	MYLGYEYVTAIR	332;332;332	_MYLGYEYVTAIR_.2	_MYLGYEYVTAIR_	147512	23330.4	96913.1
P02787;Q06AH7;Q53H26	P02787;Q06AH7;Q53H26	TF;TF;	TRFE_HUMAN;Q06AH7_HUMAN;Q53H26_HUMAN	KPVEEYANCHLAR	588;588;588	_KPVEEYANC[Carbamidomethyl (C)]HLAR_.4	_KPVEEYANC[+57]HLAR_	113904	0	0
P02787;Q06AH7;Q53H26	P02787;Q06AH7;Q53H26	TF;TF;	TRFE_HUMAN;Q06AH7_HUMAN;Q53H26_HUMAN	ADRDQYELLCLDNTR	237;237;237	_ADRDQYELLC[Carbamidomethyl (C)]LDNTR_.3	_ADRDQYELLC[+57]LDNTR_	3.86076	0	289715
P02787;Q06AH7;Q53H26	P02787;Q06AH7;Q53H26	TF;TF;	TRFE_HUMAN;Q06AH7_HUMAN;Q53H26_HUMAN	ADRDQYELLCLDNTR	237;237;237	_ADRDQYELLC[Carbamidomethyl (C)]LDNTR_.2	_ADRDQYELLC[+57]LDNTR_	3.86076	0	289715
P02787;Q06AH7;Q53H26	P02787;Q06AH7;Q53H26	TF;TF;	TRFE_HUMAN;Q06AH7_HUMAN;Q53H26_HUMAN	DGAGDVAFVK	216;216;216	_DGAGDVAFVK_.2	_DGAGDVAFVK_	122083	0	0
P02795	P02795	MT2A	MT2_HUMAN	SCCSCCPVGCAK	32	_SC[Carbamidomethyl (C)]C[Carbamidomethyl (C)]SC[Carbamidomethyl (C)]C[Carbamidomethyl (C)]PVGC[Carbamidomethyl (C)]AK_.2	_SC[+57]C[+57]SC[+57]C[+57]PVGC[+57]AK_	2.40143e+06	3573737	5054744
P02795	P02795	MT2A	MT2_HUMAN	KSCCSCCPVGCAK	31	_KSC[Carbamidomethyl (C)]C[Carbamidomethyl (C)]SC[Carbamidomethyl (C)]C[Carbamidomethyl (C)]PVGC[Carbamidomethyl (C)]AK_.3	_KSC[+57]C[+57]SC[+57]C[+57]PVGC[+57]AK_	544494	562162	219363
P02795	P02795	MT2A	MT2_HUMAN	KSCCSCCPVGCAK	31	_KSC[Carbamidomethyl (C)]C[Carbamidomethyl (C)]SC[Carbamidomethyl (C)]C[Carbamidomethyl (C)]PVGC[Carbamidomethyl (C)]AK_.2	_KSC[+57]C[+57]SC[+57]C[+57]PVGC[+57]AK_	544494	562162	219363
P02795	P02795	MT2A	MT2_HUMAN	CAQGCICK	44	_C[Carbamidomethyl (C)]AQGC[Carbamidomethyl (C)]IC[Carbamidomethyl (C)]K_.2	_C[+57]AQGC[+57]IC[+57]K_	517940	530621	232017
P02795	P02795	MT2A	MT2_HUMAN	CAQGCICK	44	_C[Carbamidomethyl (C)]AQGC[Carbamidomethyl (C)]IC[Carbamidomethyl (C)]K_.1	_C[+57]AQGC[+57]IC[+57]K_	517940	530621	232017
P04259	P04259	KRT6B	K2C6B_HUMAN	SGFSSISVSR	31	_SGFSSISVSR_.2	_SGFSSISVSR_	2.0738e+06	3.43964e+06	648175
P04259	P04259	KRT6B	K2C6B_HUMAN	ATGGGLSSVGGGSSTIK	534	_ATGGGLSSVGGGSSTIK_.2	_ATGGGLSSVGGGSSTIK_	352891	1.25323e+06	340183
P04259	P04259	KRT6B	K2C6B_HUMAN	QLDNIVGER	224	_QLDNIVGER_.2	_QLDNIVGER_	0	0	292912
P06727	P06727	APOA4	APOA4_HUMAN	LVPFATELHER	80	_LVPFATELHER_.3	_LVPFATELHER_	8974580	9319268	8.15665e+06
P06727	P06727	APOA4	APOA4_HUMAN	LVPFATELHER	80	_LVPFATELHER_.2	_LVPFATELHER_	8974580	9319268	8.15665e+06
P06727	P06727	APOA4	APOA4_HUMAN	KLVPFATELHER	79	_KLVPFATELHER_.3	_KLVPFATELHER_	2.74694e+06	2.44354e+06	433557
P07108	P07108	DBI	ACBP_HUMAN	SQAEFEK	2	_[Acetyl (Protein N-term)]SQAEFEK_.1	_[+42]SQAEFEK_	0	0	1.49574
P07108	P07108	DBI	ACBP_HUMAN	SQAEFEK	2	_[Acetyl (Protein N-term)]SQAEFEK_.2	_[+42]SQAEFEK_	0	0	1.49574
P07108	P07108	DBI	ACBP_HUMAN	TKPSDEEMLFIYGHYK	18	_TKPSDEEM[Oxidation (M)]LFIYGHYK_.3	_TKPSDEEM[+16]LFIYGHYK_	5.78563	0	0
P07108	P07108	DBI	ACBP_HUMAN	TKPSDEEMLFIYGHYK	18	_TKPSDEEMLFIYGHYK_.3	_TKPSDEEMLFIYGHYK_	5.78563	0	0
P07108	P07108	DBI	ACBP_HUMAN	TKPSDEEMLFIYGHYK	18	_TKPSDEEMLFIYGHYK_.4	_TKPSDEEMLFIYGHYK_	5.78563	0	0
P07585;Q6FH10	P07585;Q6FH10	DCN	PGS2_HUMAN;Q6FH10_HUMAN	VSPGAFTPLVK	120;120	_VSPGAFTPLVK_.2	_VSPGAFTPLVK_	10363374	12433459	3479923
P07585;Q6FH10	P07585;Q6FH10	DCN	PGS2_HUMAN;Q6FH10_HUMAN	VPGGLAEHK	284;284	_VPGGLAEHK_.2	_VPGGLAEHK_	510986	595777	494720
P07585;Q6FH10	P07585;Q6FH10	DCN	PGS2_HUMAN;Q6FH10_HUMAN	VVQCSDLGLDK	64;64	_VVQC[Carbamidomethyl (C)]SDLGLDK_.2	_VVQC[+57]SDLGLDK_	149184	226392	867704
P07585;Q6FH10	P07585;Q6FH10	DCN	PGS2_HUMAN;Q6FH10_HUMAN	DFEPSLGPVCPFR	45;45	_DFEPSLGPVC[Carbamidomethyl (C)]PFR_.2	_DFEPSLGPVC[+57]PFR_	297465	473117	296949
P07585;Q6FH10	P07585;Q6FH10	DCN	PGS2_HUMAN;Q6FH10_HUMAN	KASYSGVSLFSNPVQYWEIQPSTFR	321;321	_KASYSGVSLFSNPVQYWEIQPSTFR_.3	_KASYSGVSLFSNPVQYWEIQPSTFR_	96209.4	51105.2	170145
P07585;Q6FH10	P07585;Q6FH10	DCN	PGS2_HUMAN;Q6FH10_HUMAN	ASYSGVSLFSNPVQYWEIQPSTFR	322;322	_ASYSGVSLFSNPVQYWEIQPSTFR_.3	_ASYSGVSLFSNPVQYWEIQPSTFR_	1	1	1
P07585;Q6FH10	P07585;Q6FH10	DCN	PGS2_HUMAN;Q6FH10_HUMAN	NLHALILVNNK	106;106	_NLHALILVNNK_.3	_NLHALILVNNK_	1.91637e+06	2.25249e+06	1.68342e+06
P07585;Q6FH10	P07585;Q6FH10	DCN	PGS2_HUMAN;Q6FH10_HUMAN	NLHALILVNNK	106;106	_NLHALILVNNK_.2	_NLHALILVNNK_	1.91637e+06	2.25249e+06	1.68342e+06
P07585;Q6FH10	P07585;Q6FH10	DCN	PGS2_HUMAN;Q6FH10_HUMAN	ELHLDNNK	273;273	_ELHLDNNK_.2	_ELHLDNNK_	0	0	99553.3
P07585;Q6FH10	P07585;Q6FH10	DCN	PGS2_HUMAN;Q6FH10_HUMAN	AHENEITK	157;157	_AHENEITK_.2	_AHENEITK_	419496	392912	333219
P07585;Q6FH10	P07585;Q6FH10	DCN	PGS2_HUMAN;Q6FH10_HUMAN	VDAASLK	236;236	_VDAASLK_.2	_VDAASLK_	56366.7	40079.5	46255.2
P07585;Q6FH10	P07585;Q6FH10	DCN	PGS2_HUMAN;Q6FH10_HUMAN	VDAASLK	236;236	_VDAASLK_.1	_VDAASLK_	56366.7	40079.5	46255.2
P07585;Q6FH10	P07585;Q6FH10	DCN	PGS2_HUMAN;Q6FH10_HUMAN	ITEIKDGDFK	93;93	_ITEIKDGDFK_.3	_ITEIKDGDFK_	2.07485e+06	2.15415e+06	1.50925e+06
P07585;Q6FH10	P07585;Q6FH10	DCN	PGS2_HUMAN;Q6FH10_HUMAN	ITEIKDGDFK	93;93	_ITEIKDGDFK_.2	_ITEIKDGDFK_	2.07485e+06	2.15415e+06	1.50925e+06
P07585;Q6FH10	P07585;Q6FH10	DCN	PGS2_HUMAN;Q6FH10_HUMAN	VVQCSDLGLDKVPK	64;64	_VVQC[Carbamidomethyl (C)]SDLGLDKVPK_.2	_VVQC[+57]SDLGLDKVPK_	0	1.66474	0
P07585;Q6FH10	P07585;Q6FH10	DCN	PGS2_HUMAN;Q6FH10_HUMAN	VVQCSDLGLDKVPK	64;64	_VVQC[Carbamidomethyl (C)]SDLGLDKVPK_.3	_VVQC[+57]SDLGLDKVPK_	0	1.66474	0
P07585;Q6FH10	P07585;Q6FH10	DCN	PGS2_HUMAN;Q6FH10_HUMAN	KVTFNGLNQMIVIELGTNPLK	167;167	_KVTFNGLNQMIVIELGTNPLK_.3	_KVTFNGLNQMIVIELGTNPLK_	0	19865.4	0
P07585;Q6FH10	P07585;Q6FH10	DCN	PGS2_HUMAN;Q6FH10_HUMAN	KVTFNGLNQMIVIELGTNPLK	167;167	_KVTFNGLNQM[Oxidation (M)]IVIELGTNPLK_.3	_KVTFNGLNQM[+16]IVIELGTNPLK_	0	19865.4	0
P08670;V9HWE1	P08670;V9HWE1	VIM;HEL113	VIME_HUMAN;V9HWE1_HUMAN	EYQDLLNVK	382;382	_EYQDLLNVK_.2	_EYQDLLNVK_	12049353	12635613	12334377
P08670;V9HWE1	P08670;V9HWE1	VIM;HEL113	VIME_HUMAN;V9HWE1_HUMAN	ILLAELEQLK	130;130	_ILLAELEQLK_.2	_ILLAELEQLK_	3.77282e+06	6155576	2.1076e+06
P08670;V9HWE1	P08670;V9HWE1	VIM;HEL113	VIME_HUMAN;V9HWE1_HUMAN	VELQELNDR	105;105	_VELQELNDR_.2	_VELQELNDR_	1.30639e+06	1.29292e+06	1.05192e+06
P08670;V9HWE1	P08670;V9HWE1	VIM;HEL113	VIME_HUMAN;V9HWE1_HUMAN	NLQEAEEWYK	283;283	_NLQEAEEWYK_.2	_NLQEAEEWYK_	5.151e+06	2.87576e+06	2.79875e+06
P08670;V9HWE1	P08670;V9HWE1	VIM;HEL113	VIME_HUMAN;V9HWE1_HUMAN	FADLSEAANR	295;295	_FADLSEAANR_.2	_FADLSEAANR_	1.17418e+06	2.56583e+06	1838372
P08670;V9HWE1	P08670;V9HWE1	VIM;HEL113	VIME_HUMAN;V9HWE1_HUMAN	KLLEGEESR	402;402	_KLLEGEESR_.3	_KLLEGEESR_	365118	326449	515833
P08670;V9HWE1	P08670;V9HWE1	VIM;HEL113	VIME_HUMAN;V9HWE1_HUMAN	KLLEGEESR	402;402	_KLLEGEESR_.2	_KLLEGEESR_	365118	326449	515833
P08670;V9HWE1	P08670;V9HWE1	VIM;HEL113	VIME_HUMAN;V9HWE1_HUMAN	QDVDNASLAR	208;208	_QDVDNASLAR_.2	_QDVDNASLAR_	1.04842e+06	733582	1.35082e+06
P08670;V9HWE1	P08670;V9HWE1	VIM;HEL113	VIME_HUMAN;V9HWE1_HUMAN	QVDQLTNDK	160;160	_QVDQLTNDK_.2	_QVDQLTNDK_	154199	343734	279587
P08670;V9HWE1	P08670;V9HWE1	VIM;HEL113	VIME_HUMAN;V9HWE1_HUMAN	TNEKVELQELNDR	101;101	_TNEKVELQELNDR_.2	_TNEKVELQELNDR_	777849	1.24944e+06	1.11376e+06
P08670;V9HWE1	P08670;V9HWE1	VIM;HEL113	VIME_HUMAN;V9HWE1_HUMAN	TNEKVELQELNDR	101;101	_TNEKVELQELNDR_.3	_TNEKVELQELNDR_	777849	1.24944e+06	1.11376e+06
P08670;V9HWE1	P08670;V9HWE1	VIM;HEL113	VIME_HUMAN;V9HWE1_HUMAN	RQVDQLTNDK	159;159	_RQVDQLTNDK_.3	_RQVDQLTNDK_	183959	0	99844.1
P08670;V9HWE1	P08670;V9HWE1	VIM;HEL113	VIME_HUMAN;V9HWE1_HUMAN	RQVDQLTNDK	159;159	_RQVDQLTNDK_.2	_RQVDQLTNDK_	183959	0	99844.1
P08670;V9HWE1	P08670;V9HWE1	VIM;HEL113	VIME_HUMAN;V9HWE1_HUMAN	KVESLQEEIAFLK	223;223	_KVESLQEEIAFLK_.3	_KVESLQEEIAFLK_	449760	283014	595101
P08670;V9HWE1	P08670;V9HWE1	VIM;HEL113	VIME_HUMAN;V9HWE1_HUMAN	KVESLQEEIAFLK	223;223	_KVESLQEEIAFLK_.2	_KVESLQEEIAFLK_	449760	283014	595101
P08670;V9HWE1	P08670;V9HWE1	VIM;HEL113	VIME_HUMAN;V9HWE1_HUMAN	FANYIDK	114;114	_FANYIDK_.1	_FANYIDK_	40883.4	96015.1	0
P08670;V9HWE1	P08670;V9HWE1	VIM;HEL113	VIME_HUMAN;V9HWE1_HUMAN	FANYIDK	114;114	_FANYIDK_.2	_FANYIDK_	40883.4	96015.1	0
P08670;V9HWE1	P08670;V9HWE1	VIM;HEL113	VIME_HUMAN;V9HWE1_HUMAN	DNLAEDIMR	176;176	_DNLAEDIMR_.2	_DNLAEDIMR_	0	395929	132982
P08670;V9HWE1	P08670;V9HWE1	VIM;HEL113	VIME_HUMAN;V9HWE1_HUMAN	DNLAEDIMR	176;176	_DNLAEDIM[Oxidation (M)]R_.2	_DNLAEDIM[+16]R_	0	395929	132982
P08670;V9HWE1	P08670;V9HWE1	VIM;HEL113	VIME_HUMAN;V9HWE1_HUMAN	ISLPLPNFSSLNLR	411;411	_ISLPLPNFSSLNLR_.2	_ISLPLPNFSSLNLR_	1.27225e+06	1.09896e+06	2.1765e+06
P08670;V9HWE1	P08670;V9HWE1	VIM;HEL113	VIME_HUMAN;V9HWE1_HUMAN	ISLPLPNFSSLNLR	411;411	_ISLPLPNFSSLNLR_.3	_ISLPLPNFSSLNLR_	1.27225e+06	1.09896e+06	2.1765e+06
P08670;V9HWE1	P08670;V9HWE1	VIM;HEL113	VIME_HUMAN;V9HWE1_HUMAN	LGDLYEEEMR	146;146	_LGDLYEEEMR_.2	_LGDLYEEEMR_	1.5821e+06	954464	931089
P08670;V9HWE1	P08670;V9HWE1	VIM;HEL113	VIME_HUMAN;V9HWE1_HUMAN	LGDLYEEEMR	146;146	_LGDLYEEEM[Oxidation (M)]R_.2	_LGDLYEEEM[+16]R_	1.5821e+06	954464	931089
P08670;V9HWE1	P08670;V9HWE1	VIM;HEL113	VIME_HUMAN;V9HWE1_HUMAN	KVESLQEEIAFLKK	223;223	_KVESLQEEIAFLKK_.3	_KVESLQEEIAFLKK_	8460490	6436440	4.78321e+06
P08670;V9HWE1	P08670;V9HWE1	VIM;HEL113	VIME_HUMAN;V9HWE1_HUMAN	KVESLQEEIAFLKK	223;223	_KVESLQEEIAFLKK_.2	_KVESLQEEIAFLKK_	8460490	6436440	4.78321e+06
P08670;V9HWE1	P08670;V9HWE1	VIM;HEL113	VIME_HUMAN;V9HWE1_HUMAN	KVESLQEEIAFLKK	223;223	_KVESLQEEIAFLKK_.4	_KVESLQEEIAFLKK_	8460490	6436440	4.78321e+06
P08670;V9HWE1	P08670;V9HWE1	VIM;HEL113	VIME_HUMAN;V9HWE1_HUMAN	EEAENTLQSFR	197;197	_EEAENTLQSFR_.2	_EEAENTLQSFR_	1.11923e+06	1.56972e+06	817600
P08670;V9HWE1	P08670;V9HWE1	VIM;HEL113	VIME_HUMAN;V9HWE1_HUMAN	EEAENTLQSFR	197;197	_EEAENTLQSFR_.3	_EEAENTLQSFR_	1.11923e+06	1.56972e+06	817600
P08670;V9HWE1	P08670;V9HWE1	VIM;HEL113	VIME_HUMAN;V9HWE1_HUMAN	LHEEEIQELQAQIQEQHVQIDVDVSKPDLTAALR	237;237	_LHEEEIQELQAQIQEQHVQIDVDVSKPDLTAALR_.4	_LHEEEIQELQAQIQEQHVQIDVDVSKPDLTAALR_	0	0	1
P08670;V9HWE1	P08670;V9HWE1	VIM;HEL113	VIME_HUMAN;V9HWE1_HUMAN	LHEEEIQELQAQIQEQHVQIDVDVSKPDLTAALR	237;237	_LHEEEIQELQAQIQEQHVQIDVDVSKPDLTAALR_.5	_LHEEEIQELQAQIQEQHVQIDVDVSKPDLTAALR_	0	0	1
P08670;V9HWE1	P08670;V9HWE1	VIM;HEL113	VIME_HUMAN;V9HWE1_HUMAN	QQYESVAAK	274;274	_QQYESVAAK_.2	_QQYESVAAK_	0	108431	0
P08670;V9HWE1	P08670;V9HWE1	VIM;HEL113	VIME_HUMAN;V9HWE1_HUMAN	FANYIDKVR	114;114	_FANYIDKVR_.3	_FANYIDKVR_	0	1.436	0
P08670;V9HWE1	P08670;V9HWE1	VIM;HEL113	VIME_HUMAN;V9HWE1_HUMAN	FANYIDKVR	114;114	_FANYIDKVR_.2	_FANYIDKVR_	0	1.436	0
P08670;V9HWE1	P08670;V9HWE1	VIM;HEL113	VIME_HUMAN;V9HWE1_HUMAN	ILLAELEQLKGQGK	130;130	_ILLAELEQLKGQGK_.3	_ILLAELEQLKGQGK_	1.21453e+06	0	0
P08670;V9HWE1	P08670;V9HWE1	VIM;HEL113	VIME_HUMAN;V9HWE1_HUMAN	ILLAELEQLKGQGK	130;130	_ILLAELEQLKGQGK_.2	_ILLAELEQLKGQGK_	1.21453e+06	0	0
P08727	P08727	KRT19	K1C19_HUMAN	TKFETEQALR	167	_TKFETEQALR_.2	_TKFETEQALR_	1.13079	0	0
P08727	P08727	KRT19	K1C19_HUMAN	TKFETEQALR	167	_TKFETEQALR_.3	_TKFETEQALR_	1.13079	0	0
P08779	P08779	KRT16	K1C16_HUMAN	LAADDFR	197	_LAADDFR_.2	_LAADDFR_	28178786	124381736	28822916
P08779	P08779	KRT16	K1C16_HUMAN	LASYLDK	128	_LASYLDK_.2	_LASYLDK_	53026632	42562316	22503494
P08779	P08779	KRT16	K1C16_HUMAN	LASYLDK	128	_LASYLDK_.1	_LASYLDK_	53026632	42562316	22503494
P08779	P08779	KRT16	K1C16_HUMAN	VTMQNLNDR	119	_VTMQNLNDR_.2	_VTMQNLNDR_	3.3841e+06	2422409	5.69675e+06
P08779	P08779	KRT16	K1C16_HUMAN	VTMQNLNDR	119	_VTM[Oxidation (M)]QNLNDR_.2	_VTM[+16]QNLNDR_	3.3841e+06	2422409	5.69675e+06
P08779	P08779	KRT16	K1C16_HUMAN	ISSVLAGGSCR	31	_ISSVLAGGSC[Carbamidomethyl (C)]R_.2	_ISSVLAGGSC[+57]R_	4.99418e+06	15992420	5701175
P08779	P08779	KRT16	K1C16_HUMAN	ALEEANADLEVK	137	_ALEEANADLEVK_.2	_ALEEANADLEVK_	1.23001e+06	3040413	1.82035e+06
P08779	P08779	KRT16	K1C16_HUMAN	GSCGIGGGIGGGSSR	16	_GSC[Carbamidomethyl (C)]GIGGGIGGGSSR_.2	_GSC[+57]GIGGGIGGGSSR_	1.04236e+06	696823	4.40704e+06
P08779	P08779	KRT16	K1C16_HUMAN	LASYLDKVR	128	_LASYLDKVR_.3	_LASYLDKVR_	2.75814e+06	4.04761e+06	4.54489e+06
P08779	P08779	KRT16	K1C16_HUMAN	IIAATIENAQPILQIDNAR	178	_IIAATIENAQPILQIDNAR_.3	_IIAATIENAQPILQIDNAR_	905021	1.49888e+06	208188
P08779	P08779	KRT16	K1C16_HUMAN	EVASNSELVQSSR	318	_EVASNSELVQSSR_.2	_EVASNSELVQSSR_	193974	248652	816629
P08779	P08779	KRT16	K1C16_HUMAN	LEQEIATYR	410	_LEQEIATYR_.2	_LEQEIATYR_	804994	1120252	892149
P08779	P08779	KRT16	K1C16_HUMAN	EVFTSSSSSSSR	442	_EVFTSSSSSSSR_.2	_EVFTSSSSSSSR_	288791	382376	396342
P08779	P08779	KRT16	K1C16_HUMAN	TKYEHELALR	204	_TKYEHELALR_.3	_TKYEHELALR_	1716509	1.01415e+06	4.1284e+06
P08779	P08779	KRT16	K1C16_HUMAN	APSTYGGGLSVSSR	42	_APSTYGGGLSVSSR_.2	_APSTYGGGLSVSSR_	4.34417e+06	5.09196e+06	5.62748e+06
P08779	P08779	KRT16	K1C16_HUMAN	DAETWFLSK	303	_DAETWFLSK_.2	_DAETWFLSK_	831873	908145	1.72319e+06
P08779	P08779	KRT16	K1C16_HUMAN	LLEGEDAHLSSQQASGQSYSSR	420	_LLEGEDAHLSSQQASGQSYSSR_.3	_LLEGEDAHLSSQQASGQSYSSR_	270469	1.23326e+06	499302
P08779	P08779	KRT16	K1C16_HUMAN	VLDELTLAR	226	_VLDELTLAR_.2	_VLDELTLAR_	8958567	6.96699e+06	2.08585e+06
P08779	P08779	KRT16	K1C16_HUMAN	ASLENSLEETK	355	_ASLENSLEETK_.2	_ASLENSLEETK_	4430575	5989856	5388686
P08779	P08779	KRT16	K1C16_HUMAN	TRLEQEIATYR	408	_TRLEQEIATYR_.3	_TRLEQEIATYR_	2.13356e+06	2.48298e+06	547002
P08779	P08779	KRT16	K1C16_HUMAN	TRLEQEIATYR	408	_TRLEQEIATYR_.2	_TRLEQEIATYR_	2.13356e+06	2.48298e+06	547002
P08779	P08779	KRT16	K1C16_HUMAN	ASLENSLEETKGR	355	_ASLENSLEETKGR_.3	_ASLENSLEETKGR_	6.23733e+06	2.63248e+06	1.59308e+06
P08779	P08779	KRT16	K1C16_HUMAN	DYSPYFK	163	_DYSPYFK_.2	_DYSPYFK_	598878	0	218192
P09496	P09496	CLTA	CLCA_HUMAN	ELEEWYAR	142	_ELEEWYAR_.2	_ELEEWYAR_	0	0	14978813
P13647	P13647	KRT5	K2C5_HUMAN	ISISTSGGSFR	74	_ISISTSGGSFR_.2	_ISISTSGGSFR_	1.97748e+06	1.12908e+06	926353
P13647	P13647	KRT5	K2C5_HUMAN	TSFTSVSR	30	_TSFTSVSR_.2	_TSFTSVSR_	649178	561450	2307177
P13647	P13647	KRT5	K2C5_HUMAN	VSLAGACGVGGYGSR	49	_VSLAGAC[Carbamidomethyl (C)]GVGGYGSR_.2	_VSLAGAC[+57]GVGGYGSR_	891058	644134	457480
P13647	P13647	KRT5	K2C5_HUMAN	SFSTASAITPSVSR	16	_SFSTASAITPSVSR_.2	_SFSTASAITPSVSR_	1.57589e+06	392038	286504
P13647	P13647	KRT5	K2C5_HUMAN	AQYEEIANR	344	_AQYEEIANR_.2	_AQYEEIANR_	2.19948e+06	1.37848e+06	8012676
P13647	P13647	KRT5	K2C5_HUMAN	YEELQQTAGR	365	_YEELQQTAGR_.2	_YEELQQTAGR_	867242	485225	1.96481e+06
P13647	P13647	KRT5	K2C5_HUMAN	LAELEEALQK	432	_LAELEEALQK_.2	_LAELEEALQK_	1.44235e+06	2.6682e+06	2312621
P16949	P16949	STMN1	STMN1_HUMAN	KLEAAEER	53	_KLEAAEER_.2	_KLEAAEER_	87451.8	0	23763.5
P16949	P16949	STMN1	STMN1_HUMAN	ASSDIQVK	2	_[Acetyl (Protein N-term)]ASSDIQVK_.1	_[+42]ASSDIQVK_	0	1	33165.9
P16949	P16949	STMN1	STMN1_HUMAN	ASSDIQVK	2	_[Acetyl (Protein N-term)]ASSDIQVK_.2	_[+42]ASSDIQVK_	0	1	33165.9
P17677;Q5U058	P17677;Q5U058	GAP43	NEUM_HUMAN;Q5U058_HUMAN	ATAQPPTETGESSQAEENIEAVDETKPK	191;191	_ATAQPPTETGESSQAEENIEAVDETKPK_.3	_ATAQPPTETGESSQAEENIEAVDETKPK_	1	0	0
P23470	P23470	PTPRG	PTPRG_HUMAN	DLLPASLGSYYR	240	_DLLPASLGSYYR_.2	_DLLPASLGSYYR_	252501	134652	96031.5
P23528;V9HWI5	P23528;V9HWI5	CFL1;HEL-S-15	COF1_HUMAN;V9HWI5_HUMAN	ASGVAVSDGVIK	2;2	_[Acetyl (Protein N-term)]ASGVAVSDGVIK_.2	_[+42]ASGVAVSDGVIK_	2522452	3.6873e+06	2.47716e+06
P26022	P26022	PTX3	PTX3_HUMAN	LAESLARPCAPGAPAEAR	95	_LAESLARPC[Carbamidomethyl (C)]APGAPAEAR_.3	_LAESLARPC[+57]APGAPAEAR_	151357	151947	366693
P26022	P26022	PTX3	PTX3_HUMAN	LTSALDELLQATR	113	_LTSALDELLQATR_.2	_LTSALDELLQATR_	58739.3	125048	110710
P26022	P26022	PTX3	PTX3_HUMAN	ALAAVLEELR	148	_ALAAVLEELR_.2	_ALAAVLEELR_	0	119987	232220
P26038;V9HWC0	P26038;V9HWC0	MSN;HEL70	MOES_HUMAN;V9HWC0_HUMAN	ALTSELANAR	524;524	_ALTSELANAR_.2	_ALTSELANAR_	0	0	1.97293
P29966	P29966	MARCKS	MARCS_HUMAN	LSGFSFK	166	_LSGFSFK_.2	_LSGFSFK_	1.93148e+06	3.40882e+06	2610030
P29966	P29966	MARCKS	MARCS_HUMAN	LSGFSFK	166	_LSGFSFK_.1	_LSGFSFK_	1.93148e+06	3.40882e+06	2610030
P30530	P30530	AXL	UFO_HUMAN	APLQGTLLGYR	358	_APLQGTLLGYR_.2	_APLQGTLLGYR_	1601648	2.5658e+06	806809
P30530	P30530	AXL	UFO_HUMAN	TATITVLPQQPR	218	_TATITVLPQQPR_.2	_TATITVLPQQPR_	0	1.98508e+06	651021
P31151	P31151	S100A7	S10A7_HUMAN	KIDFSEFLSLLGDIATDYHK	69	_KIDFSEFLSLLGDIATDYHK_.3	_KIDFSEFLSLLGDIATDYHK_	17615.4	0	14480.7
P31151	P31151	S100A7	S10A7_HUMAN	GTNYLADVFEK	51	_GTNYLADVFEK_.2	_GTNYLADVFEK_	88511.1	0	24147.9
P35527	P35527	KRT9	K1C9_HUMAN	TLLDIDNTR	225	_TLLDIDNTR_.2	_TLLDIDNTR_	50983052	67384840	61505756
P35527	P35527	KRT9	K1C9_HUMAN	QGVDADINGLR	251	_QGVDADINGLR_.2	_QGVDADINGLR_	1867298	2.02131e+06	1.71226e+06
P35527	P35527	KRT9	K1C9_HUMAN	QFSSSYLSR	5	_QFSSSYLSR_.2	_QFSSSYLSR_	3022903	4.72448e+06	10070588
P35527	P35527	KRT9	K1C9_HUMAN	EIETYHNLLEGGQEDFESSGAGK	450	_EIETYHNLLEGGQEDFESSGAGK_.3	_EIETYHNLLEGGQEDFESSGAGK_	6.25031e+06	10016065	2.73228e+06
P35527	P35527	KRT9	K1C9_HUMAN	QEYEQLIAK	328	_QEYEQLIAK_.2	_QEYEQLIAK_	3732721	7346817	1.91871e+06
P35527	P35527	KRT9	K1C9_HUMAN	VQALEEANNDLENK	171	_VQALEEANNDLENK_.2	_VQALEEANNDLENK_	2.29765e+06	2.58118e+06	2.74712e+06
P35527	P35527	KRT9	K1C9_HUMAN	FSSSSGYGGGSSR	47	_FSSSSGYGGGSSR_.2	_FSSSSGYGGGSSR_	2.15389e+06	2.10645e+06	3659347
P35527	P35527	KRT9	K1C9_HUMAN	SGGGGGGGLGSGGSIR	14	_SGGGGGGGLGSGGSIR_.2	_SGGGGGGGLGSGGSIR_	3.33027e+06	2.40013e+06	2.10392e+06
P35527	P35527	KRT9	K1C9_HUMAN	IKFEMEQNLR	241	_IKFEMEQNLR_.3	_IKFEMEQNLR_	3.22194e+06	434483	462382
P35527	P35527	KRT9	K1C9_HUMAN	IKFEMEQNLR	241	_IKFEMEQNLR_.2	_IKFEMEQNLR_	3.22194e+06	434483	462382
P35527	P35527	KRT9	K1C9_HUMAN	HGVQELEIELQSQLSK	375	_HGVQELEIELQSQLSK_.3	_HGVQELEIELQSQLSK_	731730	857795	2.56968e+06
P35527	P35527	KRT9	K1C9_HUMAN	HGVQELEIELQSQLSK	375	_HGVQELEIELQSQLSK_.2	_HGVQELEIELQSQLSK_	731730	857795	2.56968e+06
P35527	P35527	KRT9	K1C9_HUMAN	NYSPYYNTIDDLKDQIVDLTVGNNK	200	_NYSPYYNTIDDLKDQIVDLTVGNNK_.3	_NYSPYYNTIDDLKDQIVDLTVGNNK_	2.63027e+06	612145	2725638
P35527	P35527	KRT9	K1C9_HUMAN	GGGGSFGYSYGGGSGGGFSASSLGGGFGGGSR	64	_GGGGSFGYSYGGGSGGGFSASSLGGGFGGGSR_.3	_GGGGSFGYSYGGGSGGGFSASSLGGGFGGGSR_	557245	778033	1.18098e+06
P35527	P35527	KRT9	K1C9_HUMAN	FSSSGGGGGGGR	35	_FSSSGGGGGGGR_.2	_FSSSGGGGGGGR_	613403	827220	538382
P35527	P35527	KRT9	K1C9_HUMAN	MTLDDFR	234	_MTLDDFR_.2	_MTLDDFR_	6858450	9749392	6.92604e+06
P35527	P35527	KRT9	K1C9_HUMAN	MTLDDFR	234	_M[Oxidation (M)]TLDDFR_.2	_M[+16]TLDDFR_	6858450	9749392	6.92604e+06
P35527	P35527	KRT9	K1C9_HUMAN	STMQELNSR	155	_STMQELNSR_.2	_STMQELNSR_	262000	259268	294423
P35527	P35527	KRT9	K1C9_HUMAN	STMQELNSR	155	_STM[Oxidation (M)]QELNSR_.2	_STM[+16]QELNSR_	262000	259268	294423
P35527	P35527	KRT9	K1C9_HUMAN	KGPAAIQK	192	_KGPAAIQK_.2	_KGPAAIQK_	1.69817e+06	2434979	1.79776e+06
P35527	P35527	KRT9	K1C9_HUMAN	GGSGGSYGGGGSGGGYGGGSGSR	491	_GGSGGSYGGGGSGGGYGGGSGSR_.2	_GGSGGSYGGGGSGGGYGGGSGSR_	330800	325424	465103
P35527	P35527	KRT9	K1C9_HUMAN	IQDWYDKK	185	_IQDWYDKK_.2	_IQDWYDKK_	986656	568043	5808529
P35527	P35527	KRT9	K1C9_HUMAN	IQDWYDKK	185	_IQDWYDKK_.3	_IQDWYDKK_	986656	568043	5808529
P35527	P35527	KRT9	K1C9_HUMAN	LASYLDKVQALEEANNDLENK	164	_LASYLDKVQALEEANNDLENK_.3	_LASYLDKVQALEEANNDLENK_	574802	401426	1.08722e+06
P35527	P35527	KRT9	K1C9_HUMAN	QVLDNLTMEK	262	_QVLDNLTM[Oxidation (M)]EK_.2	_QVLDNLTM[+16]EK_	645390	1.04142e+06	444448
P35527	P35527	KRT9	K1C9_HUMAN	QVLDNLTMEK	262	_QVLDNLTMEK_.2	_QVLDNLTMEK_	645390	1.04142e+06	444448
P35556	P35556	FBN2	FBN2_HUMAN	EHILELRPAIQPLNNHIR	2816	_EHILELRPAIQPLNNHIR_.4	_EHILELRPAIQPLNNHIR_	0	0	7.22324
P35556	P35556	FBN2	FBN2_HUMAN	YVISQGNDDSVFR	2834	_YVISQGNDDSVFR_.2	_YVISQGNDDSVFR_	1.01112e+06	0	0
P35908	P35908	KRT2	K22E_HUMAN	VDPEIQNVK	167	_VDPEIQNVK_.2	_VDPEIQNVK_	21321116	15642489	5475284
P35908	P35908	KRT2	K22E_HUMAN	GFSSGSAVVSGGSR	21	_GFSSGSAVVSGGSR_.2	_GFSSGSAVVSGGSR_	8371044	5.7139e+06	4.40595e+06
P35908	P35908	KRT2	K22E_HUMAN	YLDGLTAER	239	_YLDGLTAER_.2	_YLDGLTAER_	2.58586e+06	1.63342e+06	1.41344e+06
P35908	P35908	KRT2	K22E_HUMAN	YEELQVTVGR	375	_YEELQVTVGR_.2	_YEELQVTVGR_	15550618	2156737	6534266
P35908	P35908	KRT2	K22E_HUMAN	STSSFSCLSR	36	_STSSFSC[Carbamidomethyl (C)]LSR_.2	_STSSFSC[+57]LSR_	2.60992e+06	11000843	2.9694e+06
P35908	P35908	KRT2	K22E_HUMAN	HGGGGGGFGGGGFGSR	46	_HGGGGGGFGGGGFGSR_.3	_HGGGGGGFGGGGFGSR_	1.09779e+06	715953	3.84671e+06
P35908	P35908	KRT2	K22E_HUMAN	SLVGLGGTK	62	_SLVGLGGTK_.2	_SLVGLGGTK_	1.6751e+06	4.05623e+06	5.57798e+06
P35908	P35908	KRT2	K22E_HUMAN	KYEDEINKR	267	_KYEDEINKR_.3	_KYEDEINKR_	4.58688e+06	5.59622e+06	1.95154e+06
P35908	P35908	KRT2	K22E_HUMAN	SISISVAGGGGGFGAAGGFGGR	71	_SISISVAGGGGGFGAAGGFGGR_.2	_SISISVAGGGGGFGAAGGFGGR_	1.88704e+06	1.92278e+06	5587639
P35908	P35908	KRT2	K22E_HUMAN	VDLLNQEIEFLK	303	_VDLLNQEIEFLK_.2	_VDLLNQEIEFLK_	1.77606e+06	1.3017e+06	1607467
P35908	P35908	KRT2	K22E_HUMAN	NVQDAIADAEQR	419	_NVQDAIADAEQR_.2	_NVQDAIADAEQR_	2.06119e+06	2156271	249861
P35908	P35908	KRT2	K22E_HUMAN	SKEEAEALYHSK	363	_SKEEAEALYHSK_.3	_SKEEAEALYHSK_	1.79494e+06	1.67364e+06	2.65252e+06
P35908	P35908	KRT2	K22E_HUMAN	TAAENDFVTLKK	276	_TAAENDFVTLKK_.3	_TAAENDFVTLKK_	2.48174e+06	4.30186e+06	4.33152e+06
P35908	P35908	KRT2	K22E_HUMAN	LNDLEEALQQAK	442	_LNDLEEALQQAK_.2	_LNDLEEALQQAK_	2.0861e+06	2660533	876832
P35908	P35908	KRT2	K22E_HUMAN	SCQISCK	2	_[Acetyl (Protein N-term)]SC[Carbamidomethyl (C)]QISC[Carbamidomethyl (C)]K_.1	_[+42]SC[+57]QISC[+57]K_	105398	31675.7	56182.1
P35908	P35908	KRT2	K22E_HUMAN	WELLQQMNVGTRPINLEPIFQGYIDSLKR	210	_WELLQQMNVGTRPINLEPIFQGYIDSLKR_.4	_WELLQQMNVGTRPINLEPIFQGYIDSLKR_	404759	231329	240296
P35908	P35908	KRT2	K22E_HUMAN	WELLQQMNVGTRPINLEPIFQGYIDSLKR	210	_WELLQQM[Oxidation (M)]NVGTRPINLEPIFQGYIDSLKR_.4	_WELLQQM[+16]NVGTRPINLEPIFQGYIDSLKR_	404759	231329	240296
P35908	P35908	KRT2	K22E_HUMAN	GGSISGGGYGSGGGK	581	_GGSISGGGYGSGGGK_.2	_GGSISGGGYGSGGGK_	0	0	221359
P35908	P35908	KRT2	K22E_HUMAN	PINLEPIFQGYIDSLKR	222	_PINLEPIFQGYIDSLKR_.3	_PINLEPIFQGYIDSLKR_	0	0	35257.7
P62258;V9HW98	P62258;V9HW98	YWHAE;HEL2	1433E_HUMAN;V9HW98_HUMAN	NLLSVAYK	43;43	_NLLSVAYK_.2	_NLLSVAYK_	1.30596e+06	0	1.20356e+06
P62258;V9HW98	P62258;V9HW98	YWHAE;HEL2	1433E_HUMAN;V9HW98_HUMAN	NLLSVAYK	43;43	_NLLSVAYK_.1	_NLLSVAYK_	1.30596e+06	0	1.20356e+06
P63313	P63313	TMSB10	TYB10_HUMAN	ETIEQEKR	33	_ETIEQEKR_.2	_ETIEQEKR_	1.01473e+06	1.40557e+06	1.0595e+06
P63313	P63313	TMSB10	TYB10_HUMAN	ADKPDMGEIASFDK	2	_[Acetyl (Protein N-term)]ADKPDMGEIASFDK_.2	_[+42]ADKPDMGEIASFDK_	4.56431e+06	6.88778e+06	1.95769e+06
P63313	P63313	TMSB10	TYB10_HUMAN	ADKPDMGEIASFDK	2	_[Acetyl (Protein N-term)]ADKPDM[Oxidation (M)]GEIASFDK_.2	_[+42]ADKPDM[+16]GEIASFDK_	4.56431e+06	6.88778e+06	1.95769e+06
P63313	P63313	TMSB10	TYB10_HUMAN	NTLPTKETIEQEK	27	_NTLPTKETIEQEK_.3	_NTLPTKETIEQEK_	4.05945e+06	1.52615e+06	5453290
P63313	P63313	TMSB10	TYB10_HUMAN	NTLPTKETIEQEK	27	_NTLPTKETIEQEK_.2	_NTLPTKETIEQEK_	4.05945e+06	1.52615e+06	5453290
P63313	P63313	TMSB10	TYB10_HUMAN	ETIEQEK	33	_ETIEQEK_.2	_ETIEQEK_	2.93543e+06	3140571	1.33266e+06
P63313	P63313	TMSB10	TYB10_HUMAN	ETIEQEK	33	_ETIEQEK_.1	_ETIEQEK_	2.93543e+06	3140571	1.33266e+06
P63313	P63313	TMSB10	TYB10_HUMAN	NTLPTKETIEQEKR	27	_NTLPTKETIEQEKR_.3	_NTLPTKETIEQEKR_	454798	0	0
P63313	P63313	TMSB10	TYB10_HUMAN	NTLPTKETIEQEKR	27	_NTLPTKETIEQEKR_.4	_NTLPTKETIEQEKR_	454798	0	0
P63313	P63313	TMSB10	TYB10_HUMAN	NTLPTKETIEQEKR	27	_NTLPTKETIEQEKR_.2	_NTLPTKETIEQEKR_	454798	0	0
P67936;V9HW56	P67936;V9HW56	TPM4;HEL-S-108	TPM4_HUMAN;V9HW56_HUMAN	AGLNSLEAVKR	2;2	_[Acetyl (Protein N-term)]AGLNSLEAVKR_.2	_[+42]AGLNSLEAVKR_	25852936	36798664	25141230
P67936;V9HW56	P67936;V9HW56	TPM4;HEL-S-108	TPM4_HUMAN;V9HW56_HUMAN	IQLVEEELDR	56;56	_IQLVEEELDR_.2	_IQLVEEELDR_	8718915	8943286	9484902
P67936;V9HW56	P67936;V9HW56	TPM4;HEL-S-108	TPM4_HUMAN;V9HW56_HUMAN	KLVILEGELER	132;132	_KLVILEGELER_.3	_KLVILEGELER_	1899170	2.73364e+06	2.01644e+06
P67936;V9HW56	P67936;V9HW56	TPM4;HEL-S-108	TPM4_HUMAN;V9HW56_HUMAN	KLVILEGELER	132;132	_KLVILEGELER_.2	_KLVILEGELER_	1899170	2.73364e+06	2.01644e+06
P67936;V9HW56	P67936;V9HW56	TPM4;HEL-S-108	TPM4_HUMAN;V9HW56_HUMAN	LVILEGELER	133;133	_LVILEGELER_.2	_LVILEGELER_	3.07513e+06	2.03678e+06	1.66984e+06
P67936;V9HW56	P67936;V9HW56	TPM4;HEL-S-108	TPM4_HUMAN;V9HW56_HUMAN	AEGDVAALNR	45;45	_AEGDVAALNR_.2	_AEGDVAALNR_	306844	292015	1.26351e+06
P67936;V9HW56	P67936;V9HW56	TPM4;HEL-S-108	TPM4_HUMAN;V9HW56_HUMAN	LEEAEKAADESER	77;77	_LEEAEKAADESER_.3	_LEEAEKAADESER_	234900	402466	493817
P67936;V9HW56	P67936;V9HW56	TPM4;HEL-S-108	TPM4_HUMAN;V9HW56_HUMAN	LEEAEKAADESER	77;77	_LEEAEKAADESER_.2	_LEEAEKAADESER_	234900	402466	493817
P67936;V9HW56	P67936;V9HW56	TPM4;HEL-S-108	TPM4_HUMAN;V9HW56_HUMAN	LATALQK	70;70	_LATALQK_.2	_LATALQK_	701476	457401	735930
P67936;V9HW56	P67936;V9HW56	TPM4;HEL-S-108	TPM4_HUMAN;V9HW56_HUMAN	LATALQK	70;70	_LATALQK_.1	_LATALQK_	701476	457401	735930
P67936;V9HW56	P67936;V9HW56	TPM4;HEL-S-108	TPM4_HUMAN;V9HW56_HUMAN	AEGDVAALNRR	45;45	_AEGDVAALNRR_.3	_AEGDVAALNRR_	41321.3	33484.6	15926.3
P67936;V9HW56	P67936;V9HW56	TPM4;HEL-S-108	TPM4_HUMAN;V9HW56_HUMAN	AEGDVAALNRR	45;45	_AEGDVAALNRR_.2	_AEGDVAALNRR_	41321.3	33484.6	15926.3
P67936;V9HW56	P67936;V9HW56	TPM4;HEL-S-108	TPM4_HUMAN;V9HW56_HUMAN	IQLVEEELDRAQER	56;56	_IQLVEEELDRAQER_.3	_IQLVEEELDRAQER_	2.16043e+06	1723292	3101909
P67936;V9HW56	P67936;V9HW56	TPM4;HEL-S-108	TPM4_HUMAN;V9HW56_HUMAN	IQLVEEELDRAQER	56;56	_IQLVEEELDRAQER_.2	_IQLVEEELDRAQER_	2.16043e+06	1723292	3101909
P67936;V9HW56	P67936;V9HW56	TPM4;HEL-S-108	TPM4_HUMAN;V9HW56_HUMAN	EKAEGDVAALNR	43;43	_EKAEGDVAALNR_.2	_EKAEGDVAALNR_	162274	0	0
P67936;V9HW56	P67936;V9HW56	TPM4;HEL-S-108	TPM4_HUMAN;V9HW56_HUMAN	AGLNSLEAVK	2;2	_[Acetyl (Protein N-term)]AGLNSLEAVK_.2	_[+42]AGLNSLEAVK_	9508701	9484475	8746493
P67936;V9HW56	P67936;V9HW56	TPM4;HEL-S-108	TPM4_HUMAN;V9HW56_HUMAN	AGLNSLEAVK	2;2	_AGLNSLEAVK_.2	_AGLNSLEAVK_	9508701	9484475	8746493
P67936;V9HW56	P67936;V9HW56	TPM4;HEL-S-108	TPM4_HUMAN;V9HW56_HUMAN	IQALQQQADEAEDR	14;14	_IQALQQQADEAEDR_.2	_IQALQQQADEAEDR_	710595	1.81248e+06	842811
P67936;V9HW56	P67936;V9HW56	TPM4;HEL-S-108	TPM4_HUMAN;V9HW56_HUMAN	IQALQQQADEAEDR	14;14	_IQALQQQADEAEDR_.3	_IQALQQQADEAEDR_	710595	1.81248e+06	842811
P67936;V9HW56	P67936;V9HW56	TPM4;HEL-S-108	TPM4_HUMAN;V9HW56_HUMAN	KLVILEGELERAEER	132;132	_KLVILEGELERAEER_.3	_KLVILEGELERAEER_	825815	0	265098
P67936;V9HW56	P67936;V9HW56	TPM4;HEL-S-108	TPM4_HUMAN;V9HW56_HUMAN	HIAEEADR	117;117	_HIAEEADR_.2	_HIAEEADR_	240219	311566	192645
P67936;V9HW56	P67936;V9HW56	TPM4;HEL-S-108	TPM4_HUMAN;V9HW56_HUMAN	HIAEEADR	117;117	_HIAEEADR_.1	_HIAEEADR_	240219	311566	192645
P67936;V9HW56	P67936;V9HW56	TPM4;HEL-S-108	TPM4_HUMAN;V9HW56_HUMAN	KYEEVAR	125;125	_KYEEVAR_.2	_KYEEVAR_	420036	828717	279330
P67936;V9HW56	P67936;V9HW56	TPM4;HEL-S-108	TPM4_HUMAN;V9HW56_HUMAN	KYEEVAR	125;125	_KYEEVAR_.1	_KYEEVAR_	420036	828717	279330
P67936;V9HW56	P67936;V9HW56	TPM4;HEL-S-108	TPM4_HUMAN;V9HW56_HUMAN	KIQALQQQADEAEDR	13;13	_KIQALQQQADEAEDR_.3	_KIQALQQQADEAEDR_	183226	199393	906131
P67936;V9HW56	P67936;V9HW56	TPM4;HEL-S-108	TPM4_HUMAN;V9HW56_HUMAN	KIQALQQQADEAEDR	13;13	_KIQALQQQADEAEDR_.2	_KIQALQQQADEAEDR_	183226	199393	906131
P80303	P80303	NUCB2	NUCB2_HUMAN	ADIEEIK	78	_ADIEEIK_.2	_ADIEEIK_	405206	255235	343310
P80303	P80303	NUCB2	NUCB2_HUMAN	LVTLEEFLK	312	_LVTLEEFLK_.2	_LVTLEEFLK_	119010	118458	126262
P80303	P80303	NUCB2	NUCB2_HUMAN	TKLDELKR	101	_TKLDELKR_.2	_TKLDELKR_	77615.1	0	168514
P80303	P80303	NUCB2	NUCB2_HUMAN	TKLDELK	101	_TKLDELK_.2	_TKLDELK_	23799	0	0
P80303	P80303	NUCB2	NUCB2_HUMAN	LDSLQDIGMDHQALLK	122	_LDSLQDIGM[Oxidation (M)]DHQALLK_.3	_LDSLQDIGM[+16]DHQALLK_	0	0	6.2662
P80303	P80303	NUCB2	NUCB2_HUMAN	LDSLQDIGMDHQALLK	122	_LDSLQDIGMDHQALLK_.2	_LDSLQDIGMDHQALLK_	0	0	6.2662
P80723	P80723	BASP1	BASP1_HUMAN	ETPAATEAPSSTPK	185	_ETPAATEAPSSTPK_.2	_ETPAATEAPSSTPK_	466328	293187	214634
P80723	P80723	BASP1	BASP1_HUMAN	TEAPAAPAAQETK	151	_TEAPAAPAAQETK_.2	_TEAPAAPAAQETK_	0	0	28669.9
P80723	P80723	BASP1	BASP1_HUMAN	AAEAAAAPAESAAPAAGEEPSKEEGEPK	122	_AAEAAAAPAESAAPAAGEEPSKEEGEPK_.3	_AAEAAAAPAESAAPAAGEEPSKEEGEPK_	0	0	2.71919
P80723	P80723	BASP1	BASP1_HUMAN	AQGPAASAEEPKPVEAPAANSDQTVTVK	199	_AQGPAASAEEPKPVEAPAANSDQTVTVK_.3	_AQGPAASAEEPKPVEAPAANSDQTVTVK_	1.68186	0	1
P81605	P81605	DCD	DCD_HUMAN	ENAGEDPGLAR	43	_ENAGEDPGLAR_.2	_ENAGEDPGLAR_	480916	363271	316831
P81605	P81605	DCD	DCD_HUMAN	DAVEDLESVGK	86	_DAVEDLESVGK_.2	_DAVEDLESVGK_	1617379	4.08964e+06	3289478
P81605	P81605	DCD	DCD_HUMAN	LGKDAVEDLESVGK	83	_LGKDAVEDLESVGK_.3	_LGKDAVEDLESVGK_	0	0	1.45099e+06
P84101	P84101	SERF2	SERF2_HUMAN	RRDDGLSAAAR	26	_RRDDGLSAAAR_.3	_RRDDGLSAAAR_	0	81756.5	28466.8
Q02952	Q02952	AKAP12	AKA12_HUMAN	TEKPDTVQLLTVK	190	_TEKPDTVQLLTVK_.3	_TEKPDTVQLLTVK_	0	0	478880
Q02952	Q02952	AKAP12	AKA12_HUMAN	TEKPDTVQLLTVK	190	_TEKPDTVQLLTVK_.2	_TEKPDTVQLLTVK_	0	0	478880
Q02952	Q02952	AKAP12	AKA12_HUMAN	SPPSPVER	1328	_SPPSPVER_.2	_SPPSPVER_	0	0	1.26463
Q04695	Q04695	KRT17	K1C17_HUMAN	EVATNSELVQSGK	285	_EVATNSELVQSGK_.2	_EVATNSELVQSGK_	6.14436e+06	2.88698e+06	8310501
Q04695	Q04695	KRT17	K1C17_HUMAN	DAEDWFFSK	270	_DAEDWFFSK_.2	_DAEDWFFSK_	455059	148875	551067
Q04695	Q04695	KRT17	K1C17_HUMAN	ALEEANTELEVK	104	_ALEEANTELEVK_.2	_ALEEANTELEVK_	1428999	1.63685e+06	775630
Q04695	Q04695	KRT17	K1C17_HUMAN	ASLEGNLAETENR	322	_ASLEGNLAETENR_.2	_ASLEGNLAETENR_	565517	1.1722e+06	853842
Q09666	Q09666	AHNAK	AHNK_HUMAN	VDIDAPDVSIEGPDAK	4352	_VDIDAPDVSIEGPDAK_.2	_VDIDAPDVSIEGPDAK_	0	1.145e+06	872722
Q09666	Q09666	AHNAK	AHNK_HUMAN	ADIDVSGPSVDTDAPDLDIEGPEGK	1739	_ADIDVSGPSVDTDAPDLDIEGPEGK_.3	_ADIDVSGPSVDTDAPDLDIEGPEGK_	1	0	0
Q09666	Q09666	AHNAK	AHNK_HUMAN	VDINAPDVEVQGK	3385	_VDINAPDVEVQGK_.2	_VDINAPDVEVQGK_	3.1894e+06	0	0
Q09666	Q09666	AHNAK	AHNK_HUMAN	VQANLGAPDINIEGLDAK	5164	_VQANLGAPDINIEGLDAK_.2	_VQANLGAPDINIEGLDAK_	0	0	4.12275
Q12841	Q12841	FSTL1	FSTL1_HUMAN	ICANVFCGAGR	30	_IC[Carbamidomethyl (C)]ANVFC[Carbamidomethyl (C)]GAGR_.2	_IC[+57]ANVFC[+57]GAGR_	43017488	13452200	6.25786e+06
Q12841	Q12841	FSTL1	FSTL1_HUMAN	LSFQEFLK	213	_LSFQEFLK_.2	_LSFQEFLK_	21839220	20595564	14575174
Q12841	Q12841	FSTL1	FSTL1_HUMAN	TYLNHCELHR	72	_TYLNHC[Carbamidomethyl (C)]ELHR_.3	_TYLNHC[+57]ELHR_	918974	639635	608470
Q12841	Q12841	FSTL1	FSTL1_HUMAN	TYLNHCELHR	72	_TYLNHC[Carbamidomethyl (C)]ELHR_.2	_TYLNHC[+57]ELHR_	918974	639635	608470
Q12841	Q12841	FSTL1	FSTL1_HUMAN	SVSPSASPVVCYQSNRDELR	103	_SVSPSASPVVC[Carbamidomethyl (C)]YQSNRDELR_.3	_SVSPSASPVVC[+57]YQSNRDELR_	216137	136275	268039
Q12841	Q12841	FSTL1	FSTL1_HUMAN	LDSSEFLK	163	_LDSSEFLK_.2	_LDSSEFLK_	35496944	31632130	30144740
Q12841	Q12841	FSTL1	FSTL1_HUMAN	LDSSEFLK	163	_LDSSEFLK_.1	_LDSSEFLK_	35496944	31632130	30144740
Q12841	Q12841	FSTL1	FSTL1_HUMAN	IQVDYDGHCK	90	_IQVDYDGHC[Carbamidomethyl (C)]K_.3	_IQVDYDGHC[+57]K_	1.21546e+06	998753	3.09117e+06
Q12841	Q12841	FSTL1	FSTL1_HUMAN	IQVDYDGHCK	90	_IQVDYDGHC[Carbamidomethyl (C)]K_.2	_IQVDYDGHC[+57]K_	1.21546e+06	998753	3.09117e+06
Q12841	Q12841	FSTL1	FSTL1_HUMAN	YVQELQK	286	_YVQELQK_.2	_YVQELQK_	1.07776e+06	728649	792871
Q12841	Q12841	FSTL1	FSTL1_HUMAN	YVQELQK	286	_YVQELQK_.1	_YVQELQK_	1.07776e+06	728649	792871
Q12841	Q12841	FSTL1	FSTL1_HUMAN	SVSPSASPVVCYQSNR	103	_SVSPSASPVVC[Carbamidomethyl (C)]YQSNR_.2	_SVSPSASPVVC[+57]YQSNR_	1.81833e+06	1.93471e+06	402419
Q12841	Q12841	FSTL1	FSTL1_HUMAN	DACLTGSK	82	_DAC[Carbamidomethyl (C)]LTGSK_.2	_DAC[+57]LTGSK_	2.07933e+06	2.76825e+06	3.02526e+06
Q12841	Q12841	FSTL1	FSTL1_HUMAN	DACLTGSK	82	_DAC[Carbamidomethyl (C)]LTGSK_.1	_DAC[+57]LTGSK_	2.07933e+06	2.76825e+06	3.02526e+06
Q12841	Q12841	FSTL1	FSTL1_HUMAN	KSVSPSASPVVCYQSNRDELR	102	_KSVSPSASPVVC[Carbamidomethyl (C)]YQSNRDELR_.4	_KSVSPSASPVVC[+57]YQSNRDELR_	599751	451372	1.26343e+06
Q12841	Q12841	FSTL1	FSTL1_HUMAN	KSVSPSASPVVCYQSNRDELR	102	_KSVSPSASPVVC[Carbamidomethyl (C)]YQSNRDELR_.3	_KSVSPSASPVVC[+57]YQSNRDELR_	599751	451372	1.26343e+06
Q12841	Q12841	FSTL1	FSTL1_HUMAN	GAQTQTEEEMTR	274	_GAQTQTEEEMTR_.2	_GAQTQTEEEMTR_	88746.5	222884	227274
Q12841	Q12841	FSTL1	FSTL1_HUMAN	GAQTQTEEEMTR	274	_GAQTQTEEEM[Oxidation (M)]TR_.2	_GAQTQTEEEM[+16]TR_	88746.5	222884	227274
Q12841	Q12841	FSTL1	FSTL1_HUMAN	CLNPSFNPPEK	221	_C[Carbamidomethyl (C)]LNPSFNPPEK_.2	_C[+57]LNPSFNPPEK_	22890.2	0	0
Q12841	Q12841	FSTL1	FSTL1_HUMAN	KSVSPSASPVVCYQSNR	102	_KSVSPSASPVVC[Carbamidomethyl (C)]YQSNR_.3	_KSVSPSASPVVC[+57]YQSNR_	408480	972417	526299
Q12841	Q12841	FSTL1	FSTL1_HUMAN	KSVSPSASPVVCYQSNR	102	_KSVSPSASPVVC[Carbamidomethyl (C)]YQSNR_.2	_KSVSPSASPVVC[+57]YQSNR_	408480	972417	526299
Q12841	Q12841	FSTL1	FSTL1_HUMAN	GEPTCLCIEQCKPHK	48	_GEPTC[Carbamidomethyl (C)]LC[Carbamidomethyl (C)]IEQC[Carbamidomethyl (C)]KPHK_.4	_GEPTC[+57]LC[+57]IEQC[+57]KPHK_	1.08466e+06	656332	0
Q12841	Q12841	FSTL1	FSTL1_HUMAN	GEPTCLCIEQCKPHK	48	_GEPTC[Carbamidomethyl (C)]LC[Carbamidomethyl (C)]IEQC[Carbamidomethyl (C)]KPHK_.3	_GEPTC[+57]LC[+57]IEQC[+57]KPHK_	1.08466e+06	656332	0
Q12841	Q12841	FSTL1	FSTL1_HUMAN	GEPTCLCIEQCKPHK	48	_GEPTC[Carbamidomethyl (C)]LC[Carbamidomethyl (C)]IEQC[Carbamidomethyl (C)]KPHK_.2	_GEPTC[+57]LC[+57]IEQC[+57]KPHK_	1.08466e+06	656332	0
Q12841	Q12841	FSTL1	FSTL1_HUMAN	ECAVTEKGEPTCLCIEQCKPHK	41	_EC[Carbamidomethyl (C)]AVTEKGEPTC[Carbamidomethyl (C)]LC[Carbamidomethyl (C)]IEQC[Carbamidomethyl (C)]KPHK_.4	_EC[+57]AVTEKGEPTC[+57]LC[+57]IEQC[+57]KPHK_	71497.2	414706	17933.7
Q12841	Q12841	FSTL1	FSTL1_HUMAN	ECAVTEKGEPTCLCIEQCKPHK	41	_EC[Carbamidomethyl (C)]AVTEKGEPTC[Carbamidomethyl (C)]LC[Carbamidomethyl (C)]IEQC[Carbamidomethyl (C)]KPHK_.5	_EC[+57]AVTEKGEPTC[+57]LC[+57]IEQC[+57]KPHK_	71497.2	414706	17933.7
Q12841	Q12841	FSTL1	FSTL1_HUMAN	ECAVTEKGEPTCLCIEQCKPHK	41	_EC[Carbamidomethyl (C)]AVTEKGEPTC[Carbamidomethyl (C)]LC[Carbamidomethyl (C)]IEQC[Carbamidomethyl (C)]KPHK_.3	_EC[+57]AVTEKGEPTC[+57]LC[+57]IEQC[+57]KPHK_	71497.2	414706	17933.7
Q12841	Q12841	FSTL1	FSTL1_HUMAN	RIIQWLEAEIIPDGWFSK	124	_RIIQWLEAEIIPDGWFSK_.3	_RIIQWLEAEIIPDGWFSK_	0	7479.19	0
Q12841	Q12841	FSTL1	FSTL1_HUMAN	NFDNGDSR	155	_NFDNGDSR_.2	_NFDNGDSR_	35646.3	0	21013.8
Q13740	Q13740	ALCAM	CD166_HUMAN	QIGDALPVSCTISASR	345	_QIGDALPVSC[Carbamidomethyl (C)]TISASR_.2	_QIGDALPVSC[+57]TISASR_	4232890	6.80763e+06	1.87261e+06
Q13740	Q13740	ALCAM	CD166_HUMAN	ALFLETEQLK	143	_ALFLETEQLK_.2	_ALFLETEQLK_	1.92045e+06	1.85794e+06	2287744
Q13740	Q13740	ALCAM	CD166_HUMAN	SSNTYTLTDVR	294	_SSNTYTLTDVR_.2	_SSNTYTLTDVR_	660160	604748	222237
Q13740	Q13740	ALCAM	CD166_HUMAN	KTDPSGLSK	423	_KTDPSGLSK_.2	_KTDPSGLSK_	106307	150692	65801.8
Q13740	Q13740	ALCAM	CD166_HUMAN	ESLTLIVEGKPQIK	406	_ESLTLIVEGKPQIK_.3	_ESLTLIVEGKPQIK_	6.28743e+06	5.9111e+06	4.27725e+06
Q13740	Q13740	ALCAM	CD166_HUMAN	ESLTLIVEGKPQIK	406	_ESLTLIVEGKPQIK_.2	_ESLTLIVEGKPQIK_	6.28743e+06	5.9111e+06	4.27725e+06
Q13740	Q13740	ALCAM	CD166_HUMAN	YEKPDGSPVFIAFR	58	_YEKPDGSPVFIAFR_.3	_YEKPDGSPVFIAFR_	1.36623e+06	1.50286e+06	1615446
Q13740	Q13740	ALCAM	CD166_HUMAN	YEKPDGSPVFIAFR	58	_YEKPDGSPVFIAFR_.2	_YEKPDGSPVFIAFR_	1.36623e+06	1.50286e+06	1615446
Q13740	Q13740	ALCAM	CD166_HUMAN	VFKQPSKPEIVSK	130	_VFKQPSKPEIVSK_.4	_VFKQPSKPEIVSK_	99357.5	39462.7	868768
Q13740	Q13740	ALCAM	CD166_HUMAN	VLHPLEGAVVIIFK	176	_VLHPLEGAVVIIFK_.3	_VLHPLEGAVVIIFK_	138452	159391	88783.9
Q13740	Q13740	ALCAM	CD166_HUMAN	VLHPLEGAVVIIFK	176	_VLHPLEGAVVIIFK_.2	_VLHPLEGAVVIIFK_	138452	159391	88783.9
Q13740	Q13740	ALCAM	CD166_HUMAN	LDVPQNLMFGK	45	_LDVPQNLMFGK_.2	_LDVPQNLMFGK_	0	86690.3	137173
Q13740	Q13740	ALCAM	CD166_HUMAN	VLHPLEGAVVIIFKK	176	_VLHPLEGAVVIIFKK_.3	_VLHPLEGAVVIIFKK_	377244	145847	603365
Q13740	Q13740	ALCAM	CD166_HUMAN	VLHPLEGAVVIIFKK	176	_VLHPLEGAVVIIFKK_.4	_VLHPLEGAVVIIFKK_	377244	145847	603365
Q13740	Q13740	ALCAM	CD166_HUMAN	WKYEKPDGSPVFIAFR	56	_WKYEKPDGSPVFIAFR_.4	_WKYEKPDGSPVFIAFR_	0	0	3.32052
Q13740	Q13740	ALCAM	CD166_HUMAN	ALFLETEQLKK	143	_ALFLETEQLKK_.3	_ALFLETEQLKK_	1.26996e+06	1.43309e+06	2.19222e+06
Q13740	Q13740	ALCAM	CD166_HUMAN	ALFLETEQLKK	143	_ALFLETEQLKK_.2	_ALFLETEQLKK_	1.26996e+06	1.43309e+06	2.19222e+06
Q13740	Q13740	ALCAM	CD166_HUMAN	SSNTYTLTDVRR	294	_SSNTYTLTDVRR_.3	_SSNTYTLTDVRR_	0	475933	146501
Q13740	Q13740	ALCAM	CD166_HUMAN	SSNTYTLTDVRR	294	_SSNTYTLTDVRR_.2	_SSNTYTLTDVRR_	0	475933	146501
Q13740	Q13740	ALCAM	CD166_HUMAN	SVQYDDVPEYKDR	77	_SVQYDDVPEYKDR_.3	_SVQYDDVPEYKDR_	443354	0	0
Q13740	Q13740	ALCAM	CD166_HUMAN	SVQYDDVPEYKDR	77	_SVQYDDVPEYKDR_.2	_SVQYDDVPEYKDR_	443354	0	0
Q14011;Q53XX5	Q14011;Q53XX5	CIRBP	CIRBP_HUMAN;Q53XX5_HUMAN	GFGFVTFENIDDAK	48;48	_GFGFVTFENIDDAK_.2	_GFGFVTFENIDDAK_	158403	0	0
Q14CN4;Q3SY84	Q14CN4;Q3SY84	KRT72;KRT71	K2C72_HUMAN;K2C71_HUMAN	FLEQQNQVLETK	145;150	_FLEQQNQVLETK_.2	_FLEQQNQVLETK_	65645.5	0	0
Q15149	Q15149	PLEC	PLEC_HUMAN	GKAEEQAVR	1814	_GKAEEQAVR_.2	_GKAEEQAVR_	117345	0	0
Q15149	Q15149	PLEC	PLEC_HUMAN	FAEQTLR	2310	_FAEQTLR_.2	_FAEQTLR_	0	1	0
Q15149	Q15149	PLEC	PLEC_HUMAN	SIQEELQQLR	1554	_SIQEELQQLR_.2	_SIQEELQQLR_	0	0	1.01656e+06
Q15223;Q6SYC2	Q15223;Q6SYC2	NECTIN1;PVRL1	NECT1_HUMAN;Q6SYC2_HUMAN	VEFLRPSFTDGTIR	97;94	_VEFLRPSFTDGTIR_.3	_VEFLRPSFTDGTIR_	2.92425e+06	2.91642e+06	1.78469e+06
Q15293;V9HW95	Q15293;V9HW95	RCN1;HEL-S-84	RCN1_HUMAN;V9HW95_HUMAN	EQFNEFR	250;250	_EQFNEFR_.2	_EQFNEFR_	1194178	962177	1.34591e+06
Q15293;V9HW95	Q15293;V9HW95	RCN1;HEL-S-84	RCN1_HUMAN;V9HW95_HUMAN	EQFNEFR	250;250	_EQFNEFR_.1	_EQFNEFR_	1194178	962177	1.34591e+06
Q15293;V9HW95	Q15293;V9HW95	RCN1;HEL-S-84	RCN1_HUMAN;V9HW95_HUMAN	EEFTAFLHPEEFEHMK	189;189	_EEFTAFLHPEEFEHMK_.4	_EEFTAFLHPEEFEHMK_	1	0	0
Q15293;V9HW95	Q15293;V9HW95	RCN1;HEL-S-84	RCN1_HUMAN;V9HW95_HUMAN	EEFTAFLHPEEFEHMK	189;189	_EEFTAFLHPEEFEHMK_.3	_EEFTAFLHPEEFEHMK_	1	0	0
Q15293;V9HW95	Q15293;V9HW95	RCN1;HEL-S-84	RCN1_HUMAN;V9HW95_HUMAN	EEFTAFLHPEEFEHMK	189;189	_EEFTAFLHPEEFEHM[Oxidation (M)]K_.3	_EEFTAFLHPEEFEHM[+16]K_	1	0	0
Q4LDX3	Q4LDX3	JAK1	Q4LDX3_HUMAN	DLEEGHFGK	868	_DLEEGHFGK_.2	_DLEEGHFGK_	2.63989e+06	2.22888e+06	6926382
Q53H37;Q9NZT1	Q53H37;Q9NZT1	;CALML5	Q53H37_HUMAN;CALL5_HUMAN	NLSEAQLR	43;43	_NLSEAQLR_.2	_NLSEAQLR_	863247	318324	1.47451e+06
Q53H37;Q9NZT1	Q53H37;Q9NZT1	;CALML5	Q53H37_HUMAN;CALL5_HUMAN	AGELTPEEEAQYKK	2;2	_[Acetyl (Protein N-term)]AGELTPEEEAQYKK_.2	_[+42]AGELTPEEEAQYKK_	1.06359e+06	1.48448e+06	469283
Q56G89	Q56G89		Q56G89_HUMAN	CCTESLVNGR	500	_C[Carbamidomethyl (C)]C[Carbamidomethyl (C)]TESLVNGR_.2	_C[+57]C[+57]TESLVNGR_	40248520	34602384	99049008
Q5D862	Q5D862	FLG2	FILA2_HUMAN	SVVTVIDVFYK	7	_SVVTVIDVFYK_.2	_SVVTVIDVFYK_	138328	124858	200320
Q5HYL6;Q9NYL9	Q5HYL6;Q9NYL9	DKFZp686E1899;TMOD3	Q5HYL6_HUMAN;TMOD3_HUMAN	FGYQFTQQGPR	318;318	_FGYQFTQQGPR_.2	_FGYQFTQQGPR_	0	0	497423
Q5KU26	Q5KU26	COLEC12	COL12_HUMAN	NLITNLQR	218	_NLITNLQR_.2	_NLITNLQR_	2.76889e+06	472885	1.67368e+06
Q5KU26	Q5KU26	COLEC12	COL12_HUMAN	TLTSNLNEVR	359	_TLTSNLNEVR_.2	_TLTSNLNEVR_	371651	1.442e+06	1.40467e+06
Q6NZI2	Q6NZI2	CAVIN1	CAVN1_HUMAN	VMIYQDEVK	153	_VMIYQDEVK_.2	_VMIYQDEVK_	426170	0	0
Q6NZI2	Q6NZI2	CAVIN1	CAVN1_HUMAN	VMIYQDEVK	153	_VM[Oxidation (M)]IYQDEVK_.2	_VM[+16]IYQDEVK_	426170	0	0
Q6YHK3	Q6YHK3	CD109	CD109_HUMAN	IPVQLVFK	549	_IPVQLVFK_.2	_IPVQLVFK_	576900	363714	1.25033e+06
Q6YHK3	Q6YHK3	CD109	CD109_HUMAN	NNVVITVTQR	387	_NNVVITVTQR_.2	_NNVVITVTQR_	60464.2	0	45159.1
Q6YHK3	Q6YHK3	CD109	CD109_HUMAN	VGSPFELVVSGNKR	479	_VGSPFELVVSGNKR_.3	_VGSPFELVVSGNKR_	91566.7	0	36386.4
Q6YHK3	Q6YHK3	CD109	CD109_HUMAN	ADGNQLTLEER	375	_ADGNQLTLEER_.2	_ADGNQLTLEER_	32328.6	0	0
Q6YHK3	Q6YHK3	CD109	CD109_HUMAN	SNLIQQWLSQQSDLGVISK	173	_SNLIQQWLSQQSDLGVISK_.3	_SNLIQQWLSQQSDLGVISK_	2.67303e+06	0	0
Q71U42	Q71U42	BRL	Q71U42_HUMAN	SQAEFDKAAEEVK	2	_[Acetyl (Protein N-term)]SQAEFDKAAEEVK_.2	_[+42]SQAEFDKAAEEVK_	8809306	2.9697e+06	14622382
Q71U42	Q71U42	BRL	Q71U42_HUMAN	SQAEFDK	2	_[Acetyl (Protein N-term)]SQAEFDK_.1	_[+42]SQAEFDK_	199838	35077.8	375063
Q7Z4V5	Q7Z4V5	HDGFL2	HDGR2_HUMAN	EGPDLDRPGSDR	643	_EGPDLDRPGSDR_.3	_EGPDLDRPGSDR_	192231	167746	257345
Q86SQ4	Q86SQ4	ADGRG6	AGRG6_HUMAN	ISVVIQNILR	414	_ISVVIQNILR_.2	_ISVVIQNILR_	61387.7	0	7449.95
Q86U42	Q86U42	PABPN1	PABP2_HUMAN	AAAAAAAAAAGAAGGR	2	_[Acetyl (Protein N-term)]AAAAAAAAAAGAAGGR_.2	_[+42]AAAAAAAAAAGAAGGR_	0	185612	264008
Q8IVF2	Q8IVF2	AHNAK2	AHNK2_HUMAN	LEGDLSLADK	8.1598e+61	_LEGDLSLADK_.2	_LEGDLSLADK_	0	0	15003.7
Q8NHP8	Q8NHP8	PLBD2	PLBL2_HUMAN	LTLLQLK	184	_LTLLQLK_.2	_LTLLQLK_	322801	513139	538568
Q96C90	Q96C90	PPP1R14B	PP14B_HUMAN	ADSGTAGGAALAAPAPGPGSGGPGPR	2	_[Acetyl (Protein N-term)]ADSGTAGGAALAAPAPGPGSGGPGPR_.3	_[+42]ADSGTAGGAALAAPAPGPGSGGPGPR_	0	1.89192e+06	0
Q96D15	Q96D15	RCN3	RCN3_HUMAN	VGWEELR	133	_VGWEELR_.2	_VGWEELR_	6.75317e+06	2.91862e+06	7.3947e+06
Q96D15	Q96D15	RCN3	RCN3_HUMAN	AGDGDGWVSLAELR	90	_AGDGDGWVSLAELR_.2	_AGDGDGWVSLAELR_	1.50193e+06	1.48084e+06	1.06201e+06
Q96D15	Q96D15	RCN3	RCN3_HUMAN	DIVIAETLEDLDR	202	_DIVIAETLEDLDR_.2	_DIVIAETLEDLDR_	1	8954.93	84328.7
Q96D15	Q96D15	RCN3	RCN3_HUMAN	EFDQLTPEESQAR	67	_EFDQLTPEESQAR_.2	_EFDQLTPEESQAR_	401392	522584	345802
Q96D15	Q96D15	RCN3	RCN3_HUMAN	EFDQLTPEESQAR	67	_EFDQLTPEESQAR_.3	_EFDQLTPEESQAR_	401392	522584	345802
Q96D15	Q96D15	RCN3	RCN3_HUMAN	DIVIAETLEDLDRNK	202	_DIVIAETLEDLDRNK_.2	_DIVIAETLEDLDRNK_	1	0	89003.1
Q96D15	Q96D15	RCN3	RCN3_HUMAN	DIVIAETLEDLDRNK	202	_DIVIAETLEDLDRNK_.3	_DIVIAETLEDLDRNK_	1	0	89003.1
Q96D15	Q96D15	RCN3	RCN3_HUMAN	EELTAFLHPEEFPHMR	186	_EELTAFLHPEEFPHMR_.4	_EELTAFLHPEEFPHMR_	63069.2	0	0
Q96D15	Q96D15	RCN3	RCN3_HUMAN	EELTAFLHPEEFPHMR	186	_EELTAFLHPEEFPHMR_.3	_EELTAFLHPEEFPHMR_	63069.2	0	0
Q96D15	Q96D15	RCN3	RCN3_HUMAN	EELTAFLHPEEFPHMR	186	_EELTAFLHPEEFPHMR_.2	_EELTAFLHPEEFPHMR_	63069.2	0	0
Q96D15	Q96D15	RCN3	RCN3_HUMAN	VADQDGDSMATR	174	_VADQDGDSMATR_.2	_VADQDGDSMATR_	135123	0	0
Q96D15	Q96D15	RCN3	RCN3_HUMAN	VADQDGDSMATR	174	_VADQDGDSM[Oxidation (M)]ATR_.2	_VADQDGDSM[+16]ATR_	135123	0	0
Q96D15	Q96D15	RCN3	RCN3_HUMAN	DGHLDGSEVGHWVLPPAQDQPLVEANHLLHESDTDKDGR	258	_DGHLDGSEVGHWVLPPAQDQPLVEANHLLHESDTDKDGR_.5	_DGHLDGSEVGHWVLPPAQDQPLVEANHLLHESDTDKDGR_	33020.2	0	1
Q96D15	Q96D15	RCN3	RCN3_HUMAN	DGHLDGSEVGHWVLPPAQDQPLVEANHLLHESDTDKDGR	258	_DGHLDGSEVGHWVLPPAQDQPLVEANHLLHESDTDKDGR_.6	_DGHLDGSEVGHWVLPPAQDQPLVEANHLLHESDTDKDGR_	33020.2	0	1
Q99650	Q99650	OSMR	OSMR_HUMAN	MVFQIQISR	65	_MVFQIQISR_.2	_MVFQIQISR_	6.57126e+06	4.00405e+06	8789215
Q9GZX9	Q9GZX9	TWSG1	TWSG1_HUMAN	STVEELHEPIPSLFR	91	_STVEELHEPIPSLFR_.3	_STVEELHEPIPSLFR_	95037.9	0	0
Q9H7C4	Q9H7C4	SYNC	SYNCI_HUMAN	NLEDQIALVR	391	_NLEDQIALVR_.2	_NLEDQIALVR_	1.68533	0	0
Q9UK54	Q9UK54	HBB	Q9UK54_HUMAN	LLVVYPWTQR	13	_LLVVYPWTQR_.2	_LLVVYPWTQR_	28853620	37491004	15396817
Q9UK54	Q9UK54	HBB	Q9UK54_HUMAN	LHVDPENFR	78	_LHVDPENFR_.3	_LHVDPENFR_	1.23712e+06	1.20334e+06	796379
Q9UK54	Q9UK54	HBB	Q9UK54_HUMAN	LHVDPENFR	78	_LHVDPENFR_.2	_LHVDPENFR_	1.23712e+06	1.20334e+06	796379
Q9UK54	Q9UK54	HBB	Q9UK54_HUMAN	NVDEVGGEALGR	1	_NVDEVGGEALGR_.2	_NVDEVGGEALGR_	1.65876e+06	3443010	1.59375e+06
Q9UK76	Q9UK76	JPT1	JUPI1_HUMAN	GEGDIHENVDTDLPGSLGQSEEKPVPAAPVPSPVAPAPVPSR	100	_GEGDIHENVDTDLPGSLGQSEEKPVPAAPVPSPVAPAPVPSR_.5	_GEGDIHENVDTDLPGSLGQSEEKPVPAAPVPSPVAPAPVPSR_	1	1	1
Q9UMX5	Q9UMX5	NENF	NENF_HUMAN	LFTEEELAR	46	_LFTEEELAR_.2	_LFTEEELAR_	0	0	896187
Q9UNN8	Q9UNN8	PROCR	EPCR_HUMAN	TLAFPLTIR	105	_TLAFPLTIR_.2	_TLAFPLTIR_	1163762	1.56361e+06	875144
Q9UNN8	Q9UNN8	PROCR	EPCR_HUMAN	LHMLQISYFR	28	_LHMLQISYFR_.3	_LHMLQISYFR_	287824	253262	274854
Q9UNN8	Q9UNN8	PROCR	EPCR_HUMAN	LHMLQISYFR	28	_LHMLQISYFR_.2	_LHMLQISYFR_	287824	253262	274854
Q9UNN8	Q9UNN8	PROCR	EPCR_HUMAN	TQSGLQSYLLQFHGLVR	82	_TQSGLQSYLLQFHGLVR_.3	_TQSGLQSYLLQFHGLVR_	557787	975227	567449
Q9UNN8	Q9UNN8	PROCR	EPCR_HUMAN	TQSGLQSYLLQFHGLVR	82	_TQSGLQSYLLQFHGLVR_.2	_TQSGLQSYLLQFHGLVR_	557787	975227	567449
