# Supplementary material for: The human umbilical cord–mesenchymal stem cell secretome regulates hair growth and cycle transition by promoting methylthioadenosine synthesis via the PI3K/AKT/mTOR pathway
Source: Research Square preprint supplement (doi:10.21203/rs.3.rs-7150416/v1), 2025-08-07
Supplement: Supplementary file 3 [file a8d5628e46caa476a20153cc.docx]

**Supporting Information**

**Table of Contents**

1. **Supplementary Methods**
2. **Online-Only Figures**

**eFigure 1.** Culture, differentiation, and identification of human umbilical cord–mesenchymal stem cells (hUC-MSCs)

**eFigure 2.** Proliferation density limit of human umbilical cord–mesenchymal stem cells (hUC-MSCs)and component analysis of the secretome (SCT)

**eFigure 3.** Effect of secretome (SCT) on dermal papillary cells

**eFigure 4.** Effect of secretome (SCT) on mouse vibrissae and hair matrix cells

**eFigure 5.** Effects of metabolomic metabolites on dermal papilla cells (DPCs) and hair matrix cells (HMCs)

1. **Online-Only Tables**

**eTable 1.** Non-targeted metabolomics and phosphorylated proteomics raw data from the human umbilical cord–mesenchymal stem cell (hUC-MSC)secretome (SCT)

**eTable 2.** Data-independent acquisitionprotein quantitative data statistics and protein concentration

**eTable 3.** Hair cycle scores for telogen- and anagen-phase hair follicles in control and secretome (SCT) groups

**eTable 4.** Parameters used to assess the model quality of partial least squares discriminant analysis (PLS-DA)

**eTable 5.** Statistics of differential metabolite results

**eTable 6.** Non-targeted metabolomics raw data from the skin tissue samples

**eTable 7.** Phosphorylated proteomics raw data from the skin tissue samples

**eTable 8.** Seven-point rating scale of trial subjects

**eTable 9.** Parameters of trial subjects

**1. Supplemental Materials**

**1.1 Sex as a biological variable**

Our study examined both male and female animals, and similar findings were determined in both sexes.

**1.2 Isolation and culture of human umbilical cord–mesenchymal stem cells (hUC-MSCs)**

In a biosafety cabinet, approximately 10 cm of the hUC specimen was placed in a Petri dish, and blood was flushed from the specimen using sterile normal saline drawn with a disposable syringe (needle removed). Specimens were then cut into small segments (approximately 1 cm) and placed in sterile phosphate-buffered saline (PBS) buffer to separate the haotong glue. Subsequently, they were cut into pieces in glass vials containing small amounts of serum-free umbilical MSC basal medium (NC0106, Yocon, China), with a final tissue block size of 3–5 mm3. The tissue was spread evenly in a 10-cm dish, inverted back into the incubator for 60 min, and combined with 10 mL of 1% medium-free MSC additive 1 (NC0106.S, Yocon, China) and 1% penicillin/streptomycin solution (P/S; ScienCell, San Diego, CA, USA) in a complete serum-free MSC medium. After 48 h, 10 mL of complete medium was added to each dish. When cells were observed to migrate around the tissue block, the hUC-MSCs were predominantly long and spindle-shaped, and a significant number of cells grew in a whirlpool shape. When the cell growth density reached 95%, the cells were passaged or frozen.

**1.3 Cell culture, secretome (SCT) preparation, and component analysis**

The hUC-MSCs were cultured using 10-cm flasks. Cells from generations P1–P10 were seeded at a density of 8,000 cells/cm2, and cell morphology was observed under an inverted microscope. After 72 h of culture, the cells were passaged or frozen. The number of cells per bottle was detected using a cell counter (Guangzhou Newtonoptic Research Institute Co., Ltd., CytoCubeAuto, Guangzhou, China), and the cell proliferation density limit was calculated using log2 (N2/N0), where N0 is the initial cell number and N2 is the number after cell multiplication. SCT at 95% cell density was collected for P5 passages, mixed, and filtered through a 40-μm cell strainer (Biologix, China), and the filtrate was split into 1.5-mL Eppendorff (EP) tubes. Finally, hUC-MSC SCT was subjected to data-independent acquisition quantitative proteome analysis and untargeted metabolomic analysis (Shanghai Bioprolife Co., Ltd., Shanghai, China).

**1.4 Adipogenic and osteogenic differentiation of human umbilical cord-mesenchymal stem cells**

**1.4.1 Adipogenic cell-induced differentiation assay**

Human umbilical cord-mesenchymal stem cells (hUC-MSCs) were inoculated in a 30-mm Petri dish at a cell density of 2 × 104 per cm2 and cultured until the degree of confluence reached 100%. The medium was discarded, and 2 mL of hUC-MSC fat-induced differentiation medium A was added according to the instructions of the fat-induced differentiation kit (OriCellTM, China; HUXUC-90031), then discarded after 3 d of induction. Three milliliters of hUC-MSC adipogenic-induced differentiation medium solution B was added and cultured for 24 h before being discarded. After alternating fluids A and B 3–5 times, the cells were maintained in solution B for 4–7 d and the medium was changed every 3 d until large and circular lipid droplets were observed. After the completion of adipogenic differentiation, the cells were rinsed twice with sterile PBS for 5 min. The cells were then fixed for 30 min in a 4% paraformaldehyde solution. After three washes with PBS, 1 mL of Oil Red O dye working solution was added to each dish and cells were stained for 30 min. The Oil Red O dye solution was then discarded, and the cells were washed three times in phosphate-buffered saline (PBS). Adipogenic staining of hUC-MSCs was observed under an inverted microscope (Leica, Germany).

**1.4.2 Osteogenesis-induced differentiation experiments**

The hUc-MSCs were treated at a cell density of 2 × 104 cm–2, seeded in 30-mm dishes coated with 0.1% gelatin, and grown to 70% confluence. The medium was discarded, and 2 mL of hUC-MSC adipogenic differentiation complete medium was added according to the instructions of the osteogenic differentiation kit (OriCellTM, China; Huxuc-90021). The solution was changed every 3 d. After 2–4 w of induction, cultures were terminated based on the morphological changes and growth of hUC-MSCs and washed twice with sterile PBS for 5 min. The cells were then fixed for 30 min in a 4% paraformaldehyde solution. After three washes with PBS, the cells were stained with an alizarin red dye solution for 3–5 min. The dye solution was discarded, and the cells were washed three times with PBS. Osteogenic staining of the hUC-MSCs was performed under an inverted microscope (Leica, Germany).

**1.4.3 Flow cytometry**

To identify hUC-MSC surface markers, third-generation cells with good growth status were collected, washed twice with sterile PBS, digested with tryptic enzyme (containing 0.02% EDTA) to single cells, centrifuged at 1,000 rpm for 5 min, and washed twice with sterile PBS. Then, sterile PBS was added to make a cell suspension with a cell concentration of 1×107 cells per mL. The reagent was added to numbered flow tubes according to the MSC kit instructions (BD Biosciences, USA, Human MSC Analysis Kit; 562245).

The following materials were added into flow tubes numbered 1–9: (1) FITC Mouse Anti-Human CD90 (5 μL); (2) PE Mouse Anti-Human CD44 (5 μL); (3) PerCP-CyTM5.5 Mouse Anti-Human CD105 (5 μL); (4) APC Mouse Anti-Human CD73 (5 μL); (5) Nothing; (6) hMSC Positive Isotype Control Cocktail (20 μL); PE Negative Isotype Control Cocktail (20 μL); (7) hMSC Positive Cocktail (20 μL); PE Negative Cocktail (20 μL); and/or (8) hMSC Positive Isotype Control Cocktail (20 μL); Drop in isotype control (i.e., PE Mouse IgG2b,κ; 5 μL); (9) hMSC Positive Cocktail (20 μL); PE Drop in (i.e., PE Mouse Anti-Human CD44; 5 μL); 100 μL cell suspension, and incubated on ice for 30 min away from light. The cells were centrifuged at 1,000 rpm for 4 min and washed twice with sterile PBS. Then, 400 μL of sterile PBS was added to each tube and slowly blown into uniform single cells, and the expression of hUC-MSC surface markers was measured using flow cytometry.

**1.5 Untargeted metabolomic and phosphoproteomic analysis**

Sample pretreatment: For metabolite extraction, the mouse skin treated with PBS and SCT was stored at –80 °C after liquid nitrogen treatment. Before analysis, the samples were thawed at 4 °C, and 35 mg of sample was weighed and placed into an EP tube. Three medium-sized steel balls were then added and this was mixed with 200 μL pre-cooled 80% methanol aqueous solution. The samples were homogenized and the mixture was crushed in a tissue disruptor. Then, 800 μL pre-cooled 80% methanol aqueous solution was added, which was then sonicated in an ice bath for 20 min at −20 °C for 1 h and centrifuged at 16,000 × *g* and 4 °C for 20 min. Finally, the supernatant was dried in a high-speed vacuum concentration centrifuge. For mass spectrometry, 50 μL of 50% methanol in water was redissolved and centrifuged at 20,000 × *g* and 4 °C for 15 min, and the supernatant was collected for analysis.

Protein extraction: Each sample was ground with liquid nitrogen, combined with the appropriate amount of SDT lysate, homogenized using a homogenizer, transferred to an EP tube, placed in a boiling bath for 3 min, sonicated for 2 min at 4 °C, and centrifuged at 16,000 × *g* for 20 min before removing the supernatant and quantifying the protein content using the bicinchoninic acid (BCA) assay.

**1.5.1 Sample preprocessing**

For protein enzymolysis, an appropriate amount of protein was taken from each sample for filter-aided sample preparation enzymolysis: Dithiothreitol (DTT) was added to 100 mM in each sample, boiled in a water bath for 5 min, and cooled to 37 ℃. Then, 200 μL UA buffer (8M Urea, 150 mM Tris-HCl, pH 8.0) was added, the solution was mixed, transferred to 10-KD ultrafiltration centrifuge tubes, and centrifuged at 12,000 × *g* for 15 min. Then, 200 μL UA buffer was added, the mixture was centrifuged at 12,000 × *g* for 15 min, and the filtrate was then discarded. Next, 100 μL of IAA (50 mM IAA in UA) was added, which was shaken at 600 rpm for 1 min, protected from 37 ℃ for 30 min, and centrifuged at 12,000 × *g* for 10 min. Next, 100 μL UA buffer was added and the mixture was centrifuged twice at 12,000 × *g* for 10 min. Next, 100 μL NH4HCO3 buffer was added and the mixture was centrifuged twice at 14,000 × *g* for 10 min. Next, 40 μL Trypsin buffer (6 μg Trypsin in 40 μL NH4HCO3 buffer) was added, shaken at 600 rpm for 1 min, and incubated at 37 °C for 16–18 h. Then, the collection tubes were replaced and the mixture was centrifuged at 12,000 × *g* for 10 min. The filtrate was collected and an appropriate amount of 0.1% trifluoroacetic acid (TFA) solution was added, and the enzymatic peptides were desalted using a C18 cartridge and lyophilized under vacuum. The enzymatic peptides were dried and reconstituted in 0.1% formic acid (FA), and the peptide concentration was determined using a NanoDrop spectrophotometer.

For the enrichment of phosphorylated peptides, the peptide solution was then lyophilized by vacuum, phosphopeptides were enriched using a Fe-NTA Phosphopeptide Enrichment kit (Thermo, A32992), and the eluted phosphopeptides were collected according to the kit steps, concentrated in a vacuum, and dissolved with 10 μL 0.1% FA for mass spectrometry analysis.

**1.5.2 Liquid chromatography with tandem mass spectrometry (LC–MS/MS) analysis**

Samples were separated using a SHIMADZU-LC30 ultra-high performance liquid chromatography system with an ACQUITY UPLC® HSS T3 (2.1×100 mm, 1.8 µm; Walters, Milford, MA, USA) column under the following conditions: feed volume, 4 μL; column temperature, 40 °C; flow rate, 0.3 mL/min; chromatographic mobile phases A and B, 0.1% FA aqueous solution, and acetonitrile, respectively. The chromatographic gradient elution procedure was: 0–2 min, 0 B; 2–6 min, B from 0% linearly to 48%; 6–10 min, B from 48% linearly to 100%; 10–12 min, B maintained at 100%; 12–12.1 min, B linearly from 100% to 0%; and 12–15 min, B maintained at 0%. Positive ion (+) and negative ion (-) modes were tested for each sample using electrospray ionization. Samples were separated using ultra-high-performance liquid chromatography and analyzed using mass spectroscopy with a QE Plus mass spectrometer (Thermo Scientific). For ionization using the heated electrospray ionization source, the ionization conditions were: spray voltage, 3.8 kV (+) and 3.2 kV (-); capillary temperature, 320 °C (±); sheath gas, 30 °C (±); aux gas, 5 °C (±); probe heater temp, 350 °C (±); S-lens RF level, 50. The mass spectrum acquisition settings were: MS acquisition time, 15 min; parent ion scanning range, 75–1,050 *m/z*; first-level mass spectrum resolution, 70,000 @ *m/z* 200; AGC target, 3e6; first-level maximum IT, 100 ms. Secondary mass spectrometry analysis was collected: a secondary mass spectrometry (MS2 scan) of the 10 highest-intensity parent ions was triggered after each full scan with a secondary MS resolution of 17,500 @ *m/z* 200, AGC target of 1e5, secondary maximum IT of 50 ms, MS2 activation type of HCD, isolation window of 2 *m/z*, and normalized collision energy (stepped) of 20, 30, and 40.

Data analysis: To verify the metabolite identification method, we evaluated and analyzed the system stability of the experiment using two strategies: mass spectrum base peak map comparison of the quality control samples and principal component analysis of the total samples. The mass spectrometry total ion chromatograms (base peaks) of quality control samples were compared in positive and negative ion detection modes. The results showed that the response intensity and retention time of each chromatographic peak were consistent, indicating minimal variation caused by instrumental error throughout the experimental process and hence reliable data quality could be inferred.

Statistical analysis of data-independent acquisition (DIA) protein qualitative and quantitative results: Each sample was prepared independently. After protein enzymatic hydrolysis, DIA analysis was performed separately. Original DIA mass spectrometry files were imported into Spectronaut for analysis, and Q < −0.01 was used as the screening parameter. To analyze the phosphorylation sites with significant differences in the quantitative results, we first ensured that at least three samples corresponding to the identified phosphorylation sites retained at least three zero-free data points in one of the groups. We then used *k*-nearest neighbor filling for zero quantities, followed by pairwise comparison, where an expression difference of 5.0-fold (up and down regulation) and *p* <0.05 were considered to indicate modification sites with significant differential expression.

**1.6 C57BL/6 mouse model of the hair-follicle cycle**

C57BL/6 mice were anesthetized intraperitoneally with 2% pentobarbital (Sigma, St. Louis, MO, USA; *w/v*; 0.01 mL/g body mass). A hair removal cream was used to remove the hair shaft from the back without damaging the hair root. Pink skin color was used to identify telogen-phase hair follicles on the backs of the mice. After depilation, all mice were randomly divided into two groups based on body weight, with 12 mice in each group. Four circles (0.5-cm diameter) were drawn on the back of each mouse, with different concentrations of SCT (100 μL) applied in the treatment groups and PBS (100 μL) used in the control group, both of which were applied once daily for 7 d. On days 3 and 7, the back skin of the mice was photographed using a digital camera. The mice were sacrificed by cervical dislocation. Treated skin was collected from each group. After removing subcutaneous tissue, the dermis of the skin was placed facing up under a stereomicroscope (SZX 12, China). The structure of the hair bulb (Hb) was observed and photographed, and the maximum diameter was measured using LitoDigital software, which was used to calculate the average value. Finally, skin tissue was fixed with 4% paraformaldehyde and embedded in paraffin.

Hair length and diameter measurement: Three 7-w-old C57BL/6 mice were selected and depilated with hair removal cream. Their backs were divided into two parts, which were smeared with 200 μL PBS and 200 μL 100% SCT, respectively, once daily for 24 d. On day 24, 40 hairs from each part were randomly selected and photographed under a stereomicroscope, and the length and diameter of the hairs were measured using LitoDigital software.

**1.7 Hair-follicle staging and immunofluorescence staining**

The tissue paraffin blocks described above were cut into 5-μm paraffin sections, dewaxed with xylene, hydrated with graded concentrations of ethanol, and subjected to hematoxylin and eosin staining to observe hair-follicle morphology. Thirty longitudinal hair follicles were selected randomly from each group. The anagen hair-follicle stage was evaluated according to comprehensive guidelines for mouse hair-follicle classification, resulting in a quantitative score.

After dewaxing and rehydration of paraffin sections, 0.1 mol/L sodium citrate solution was used for antigen repair, and sections were incubated with 3% hydrogen peroxide to block endogenous catalase activity. Then, the sections were incubated with 5% bovine serum albumin (BSA; Sigma, USA) for 1 h at 37 °C. Ki67 antibody (1:200; Abcam, Cambridge, USA; ab15580) was added to the sections and incubated at 4 °C for 12 h. After washing with PBS, the sections were incubated with the sheep anti-rabbit IgG secondary antibody (1:1,000; Abcam, Cambridge, USA; # ab150091) for 30 min at 37 °C. Hoechst 33342 (1:100; RiboBio, Shanghai, China; C00033) and an upright microscope (Leica, Germany) were used for analysis.

**1.8 Extraction of mouse vibrissae and *ex vivo* organ culture**

Vibrissae were isolated from 7-w-old C57BL/6 mice. Mice were anesthetized by intraperitoneal injection of 2% pentobarbital (0.01 mL/g) and sacrificed by cervical dislocation. The skin around the nose was dissected under a stereomicroscope, and structurally intact vibrissae were dissected using forceps. After thorough washing with PBS containing 1% P/S, the isolated vibrissae were grouped in Williams E medium (Gibco, Grand Island, NY, USA) containing 10 ng/mL hydrocortisone, 10 mg/mL insulin, 2 mM L-glutamine, and 100 μL/mL penicillin without phenol red and incubated at 37 °C and 5% CO2 for 3 d for grouping treatments. The culture medium was changed at 48-h intervals. Photographs were taken using a stereomicroscope (20, SZX 12, China) on days 0, 5, and 10 of culture, and hair-shaft elongation was measured using LitoDigital software.

Hair-shaft elongation (%) = (hair-shaft length on Day 10 − hair-shaft length on Day 0) / hair-shaft length on Day 0 × 100 (1)

**1.9 Immunofluorescence and terminal deoxynucleotidyl transferase dUTP nick end labeling (TUNEL) staining**

Mouse vibrissae tissue was flash-frozen in liquid nitrogen, embedded in Optimal cutting temperature compound, and sectioned at a thickness of 5 μm. Sections were allowed to dry at 37 °C for 30 min prior to staining, fixed with −20 °C pre-cooled methanol for 15 min, then washed with PBS for 5 min and blocked in 5% BSA solution for 30 min at 37 ℃. Ki67 antibody (1:200; Abcam, Cambridge, USA; ab15580) was added to the sections and incubated at 4 °C for 12 h. After washing with PBS, the sections were incubated with the sheep anti-rabbit IgG secondary antibody (1:1,000; Abcam, Cambridge, USA; # ab150091) for 30 min at 37 °C. Hoechst 33342 (1:100; RiboBio, Shanghai, China; C00033) and confocal fluorescence microscopy (LSM 880; Carl Zeiss, Jena, Germany) were used for analysis. TUNEL staining was evaluated for apoptosis in tissues using a TUNEL FITC Apoptosis Detection Kit (Vazyme, China).

**1.10 CCK8 and EdU assays for cell proliferation**

DPCs and HMCs were seeded in 96-well plates at a density of 2 × 103 cells/well. After starvation for 8 h, cells were treated with different drugs for 24 h. Then, 10 μL CCK8 solution (GlpBio, Montclair, CA, USA) was added to each well. After incubation at 37 °C for 1 h, absorbance was measured at 450 nm using a full-wavelength microplate reader (BLJ BIO-RECH, China, DLJ-200), and the cell survival rate (%) was calculated as:

Cell survival (%) = (Ab sample well-Ab blank hole) × 100 (2)

(Ab control hole-Ab blank hole)

Next, DPCs and HMCs were seeded in 24-well plates with three duplicate wells in each group and treated with the drug for 24 h after starvation for 8 h. The EdU assay was performed according to the manufacturer’s instructions (BeyoClick™ EdU Cell Proliferation kit with Alexa Fluor 488, C0071S, Beyotime, Shanghai, China). Fluorescence images were obtained using an inverted fluorescence microscope (Leica, Germany) and the rate was calculated:

EdU+ positive cell rate (%) = (EdU+ cell number/DAPI+ cell number) × 100 (3)

**1.11 Alkaline phosphatase (ALP) staining and ALP activity detection**

DPCs were inoculated into 24-well plates with three duplicate wells for each group and treated with the drug for 24 h after starvation for 8 h. The cells were then washed three times with PBS and fixed with 4% paraformaldehyde for 15 min. ALP expression was measured using a BCIP/NBT ALP Color Development Kit (Beyotime, Shanghai, China) according to the manufacturer’s protocol, and the staining results were visualized and photographed under an inverted microscope (Leica, Germany).

DPCs were inoculated in six-well plates and incubated with serum-free high glucose Dulbecco's Modified Eagle Medium (DMEM) as the vehicle control with the 20% SCT treatment group for 24 h. Cells were washed twice with DPBS and lysed with 100 μL cell lysis buffer per well. The cell lysates were centrifuged at 10,000 × *g* for 15 min at 4 °C. Then, 50 μL of the supernatant was incubated with 50 μL of p-nitrobenzene phosphate liquid chromogenic substrate (Beyotime, Shanghai, China) for 30 min. Finally, ALP activity was measured at 405 nm using a full-wavelength microplate reader (BLJ BIO-RECH, China, DLJ-200).

**1.12 Cell scratch and Transwell experiments**

For the cell scratch experiment, cells were seeded and grown to 100% confluence in six-well plates and serum-starved for 8 h. A 200-μL sterile plastic gun tip was streaked in the middle of each well and washed with PBS to form a vertical scratch. The area of the scratch at 0 h was measured in three randomly-selected areas. The cells were treated with different drugs for 24 h, and the areas of the scratches were measured at 12 h and 24 h.

Wound healing rate = (0 h scratch area – 12 h/24 h scratch area) / 0 h scratch area (4)

In the Transwell assay, DPCs were seeded in a Transwell chamber in 24-well plates at 2 × 103 cells per well. After adding different drugs to the lower chamber for 48 h, the migrated cells on the filter membrane were quantitatively analyzed using crystal violet staining. Cell migration capacity was determined by counting the number of cells passing through the Transwell chamber filter.

**1.13 Enzyme-linked immunosorbent assay (ELISA)**

The concentrations of vascular endothelial growth factor (VEGF), hepatocyte growth factor (HGF), and insulin-like growth factor-1 (IGF-1) were determined from the DPC cell-culture medium using the human VEGF ELISA kit (Boshen, China; BS-E5144H1), human HGF ELISA kit (Boshen, China; BS-E4207H1), and human IGF-1 ELISA kit (Boshen, China; BS-E5226H2), according to the manufacturer’s instructions. In addition, intracellular methylthioadenosine (MTA) levels in the samples were measured using a full-wavelength microplate reader (BLJ BIO-RECH, China, DLJ-200) following the instructions of the MTA ELISA kit (FANKEW, China, F0225-OA).

**1.14 Western blot analysis**

Cells were starved in serum-free conditions for 8 h, cultured in a medium with or without 20% SCT for 1 h, washed with pre-cooled DPBS, lysed by radio immunoprecipitation assay lysis buffer (KeyGEN, Jiangsu, China), and collected by centrifugation at 12,000 rpm for 15 min at 4 °C. The total protein concentration was determined using a BCA Protein Assay kit (Beyotime Technology, Shanghai, China; P0010). Equal amounts of protein samples from different groups were separated using sodium dodecyl sulfate-polyacrylamide gel electrophoresis and transferred to polyvinylidene difluoride membranes (Millipore, Bedford, MA, USA).

Cells were incubated with blocking membrane with QuickBlock™ Blocking buffer (Beyotime, Shanghai, China; P0252) at 37 ℃ for 30 min, then with the primary antibodies, β-catenin (1:1,000; Abcam, Cambridge, USA; # ab32572), Wnt10b (1:1,000; Origenin, China; # TA351953), SHH (1: 2,000; Bioswamp, China; # PAB47356), Gli-1 (1:2,000; Bioswamp, China; # PAB32098), PI3K (1:1,000; Cell Signaling, MA, USA; #4392S), p-PI3K (1:1,000; Abcam, Cambridge, USA; #ab278545), AKT (1:1,000; Cell Signaling, MA, USA; #4691T), p-AKT (1:1,000; Cell Signaling, MA, USA; #4060T), mTOR (1:2,000; Cell Signaling, MA, USA; # 2983T), or p-mTOR (1:1,000; Cell Signaling, MA, USA; # 5536T) overnight at 4 °C. After washing with Tris-buffered saline containing Tween-20 (TBST), the membrane was incubated with the corresponding horseradish peroxidase-conjugated secondary antibody (1:2,000; Cwbio, Beijing, China; CW0156S) at 37 ℃ for 1 h. Subsequently, membranes were washed and exposed to an enhanced chemiluminescent substrate (Millipore, Bedford, MA, USA). Band intensity was quantified using Quantity One software (Bio-Rad, Hercules, CA, USA).

**1.15 Clinical study design and efficacy assessment criteria**

Between June 2024 and September 2024, nine male and 10 female participants aged 25–50 y with normal scalp status and self-perceived hair thinning with a need for alopecia prevention were selected to participate in a three-month clinical study. Subjects with a known history of drug allergy, suspected malignancy, scalp seborrheic dermatitis, pregnant and lactating women, or those who had not completed the three-month course were excluded from the study. During the study stage, participants were allowed to trim their hair after clinical field testing but were advised not to change their hairstyle or perform any salon procedures, such as perming, dyeing, or straightening, and to avoid prolonged exposure of the scalp to the sun. Except for the three study designers, all other investigators, including outcome assessors, were blinded to the treatment and remained so until data analysis was completed.

The participants received both oral and written instructions on the correct use of SCT. The participants were asked to use 4 mL of SCT for total scalp application three times a week throughout the study. The participants underwent a basic body system overview, lifestyle inquiries, and scalp assessments at each visit. At the initial visit, clinical photographs of the scalp vertex area were obtained according to standardized photographic techniques (Canon EOS 700D, Canon Inc., Tokyo, Japan), and the sparse hair areas on the participants’ heads were marked with a red pigment. Hair photographs of the target area were obtained using 4 K ultra-high-definition hair and dermoscopy equipment (HONSKIN Medical, China, HXSK-III). The total number of hairs within an 8-mm diameter area in the participant’s hair photographs was counted, and the hair-shaft diameter was measured within the first centimeter above the pore to determine the average hair diameter. General photography and hair dermoscopy were performed at two stages: at the baseline (research initiation) and after three months. At the end of the study, general photographs (baseline and three months) were assessed by three physicians who were blinded to the treatment group based on a seven-point rating scale (−3 = significant deterioration, −2 = moderate deterioration, −1 = mild deterioration, 0 = no change, 1 = mild improvement, 2 = moderate improvement, 3 = significant improvement).

Hair density (n/cm2) = total number of hairs in the target area/target area; (5)

average hair diameter = sum/hair diameter/total number of hairs; (6)

terminal hair percentage = (number of hairs with a diameter > 60 μm in the target area/ total number of hairs in the target area) × 100%; (7)

middle hair percentage = (number of hairs with a diameter of 30–60 μm in the target area / total number of hairs in the target area) × 100%; (8)

vellus hair percentage = (number of hairs with a diameter <30 μm in the target area / total number of hairs in the target area) × 100% (9)

Scalp physiological test:Basic body system overviews, lifestyle inquiries, and scalp assessments were performed at each visit. The subjects were not permitted to undergo any salon procedures, including hair washing, scalding, or dyeing, the day before each test, and were told to avoid exposure of the scalp to the sun for long periods. At the beginning of the study and three months after treatment, we detected physiological indicators on the scalp, 2 cm above the right side of the pigment mark in the hair area of the subject's head. The environmental conditions of the entire test process were controlled: temperature, 21 ± 1 °C, humidity, 50 ± 10% RH, and test onset timed after the subject had sat for 30 min. The pH value, elasticity, and moisture of the scalp were detected with a multifunctional skin physiological indicator detector (Courage+ Khazaka Electronic GmbH, Germany), whereas scalp oil was detected with a scalp oil tester (Courage+ Khazaka Electronic GmbH, meimeter ® Mb560). Transepidermal water loss was detected using a skin moisture loss tester (BIOX, England, aquafluxtmaf200). Each index measurement was repeated three times.

GraphPad Prism software was used to analyze the statistical significance of the results. All quantitative data are expressed as the mean ± standard deviation. The statistical significance of differences between the two groups was determined using the paired samples Wilcoxon test at *p* <0.05.

**2. Online-Only Figures**


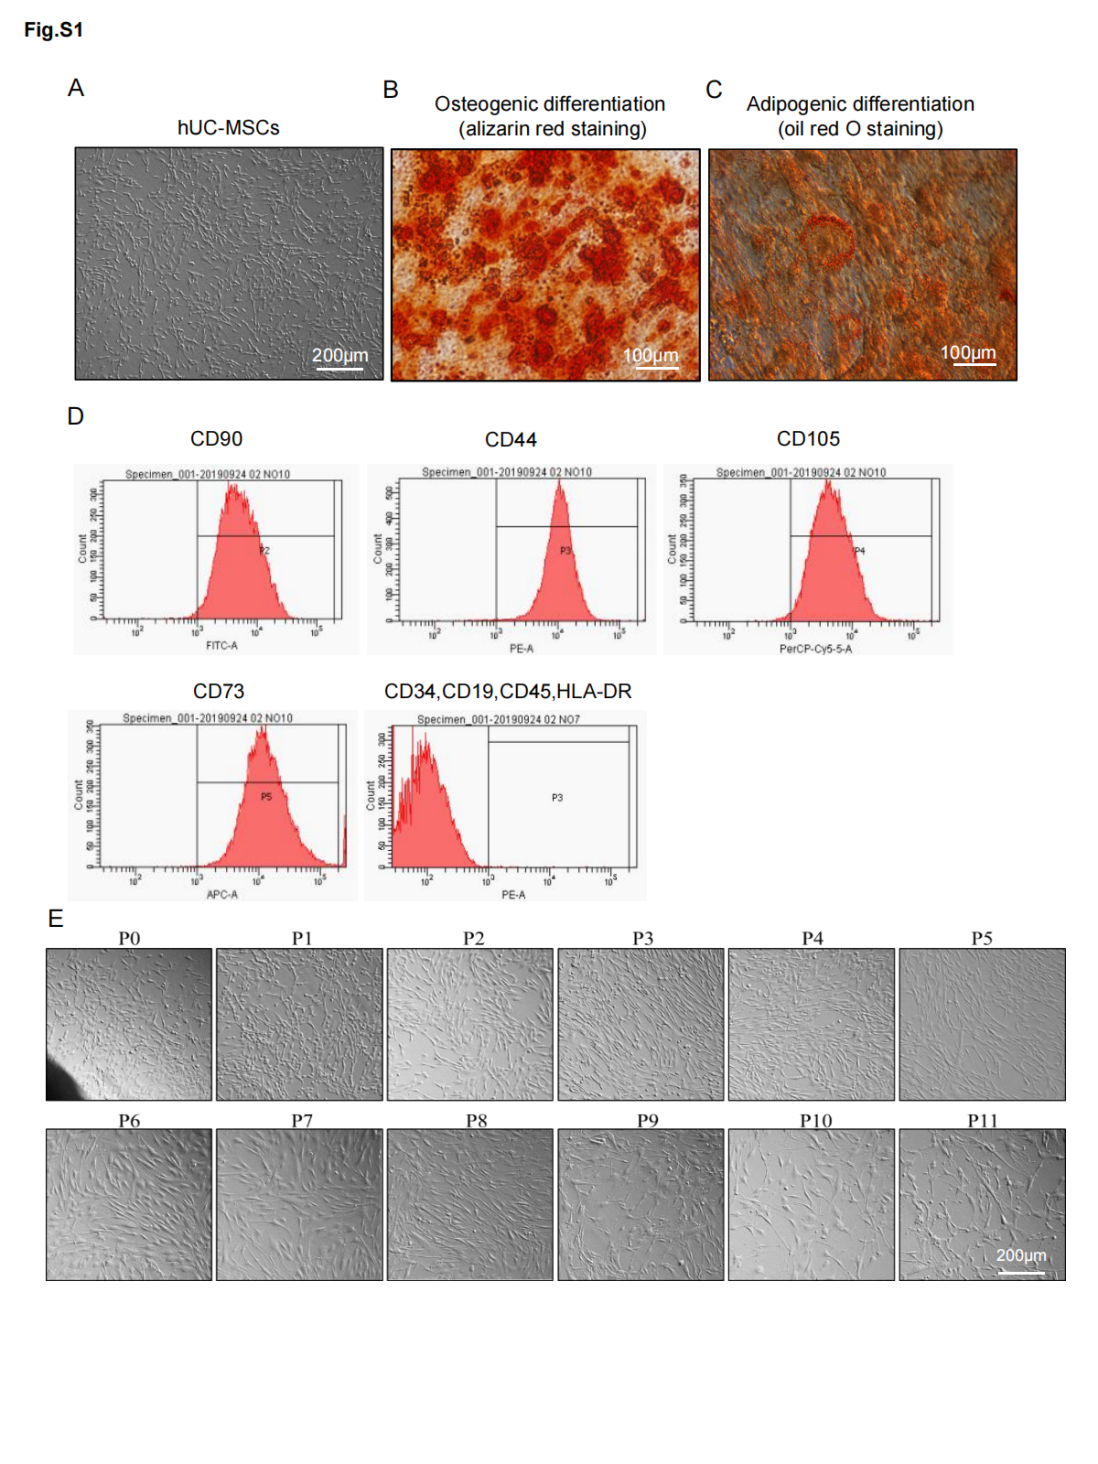


**eFig. 1.** **Culture, differentiation, and identification of human umbilical cord–mesenchymal stem cells (hUC-MSCs)**

(a) Cell morphology of hUC-MSCs. (b) Osteogenic differentiation of hUC-MSCs. (c) Lipogenic differentiation of hUC-MSCs. (d) Surface markers of hUC-MSCs identified using flow cytometry. (e) Comparison of cell morphology of P0–P11 generation hUC-MSCs using light microscopy

**
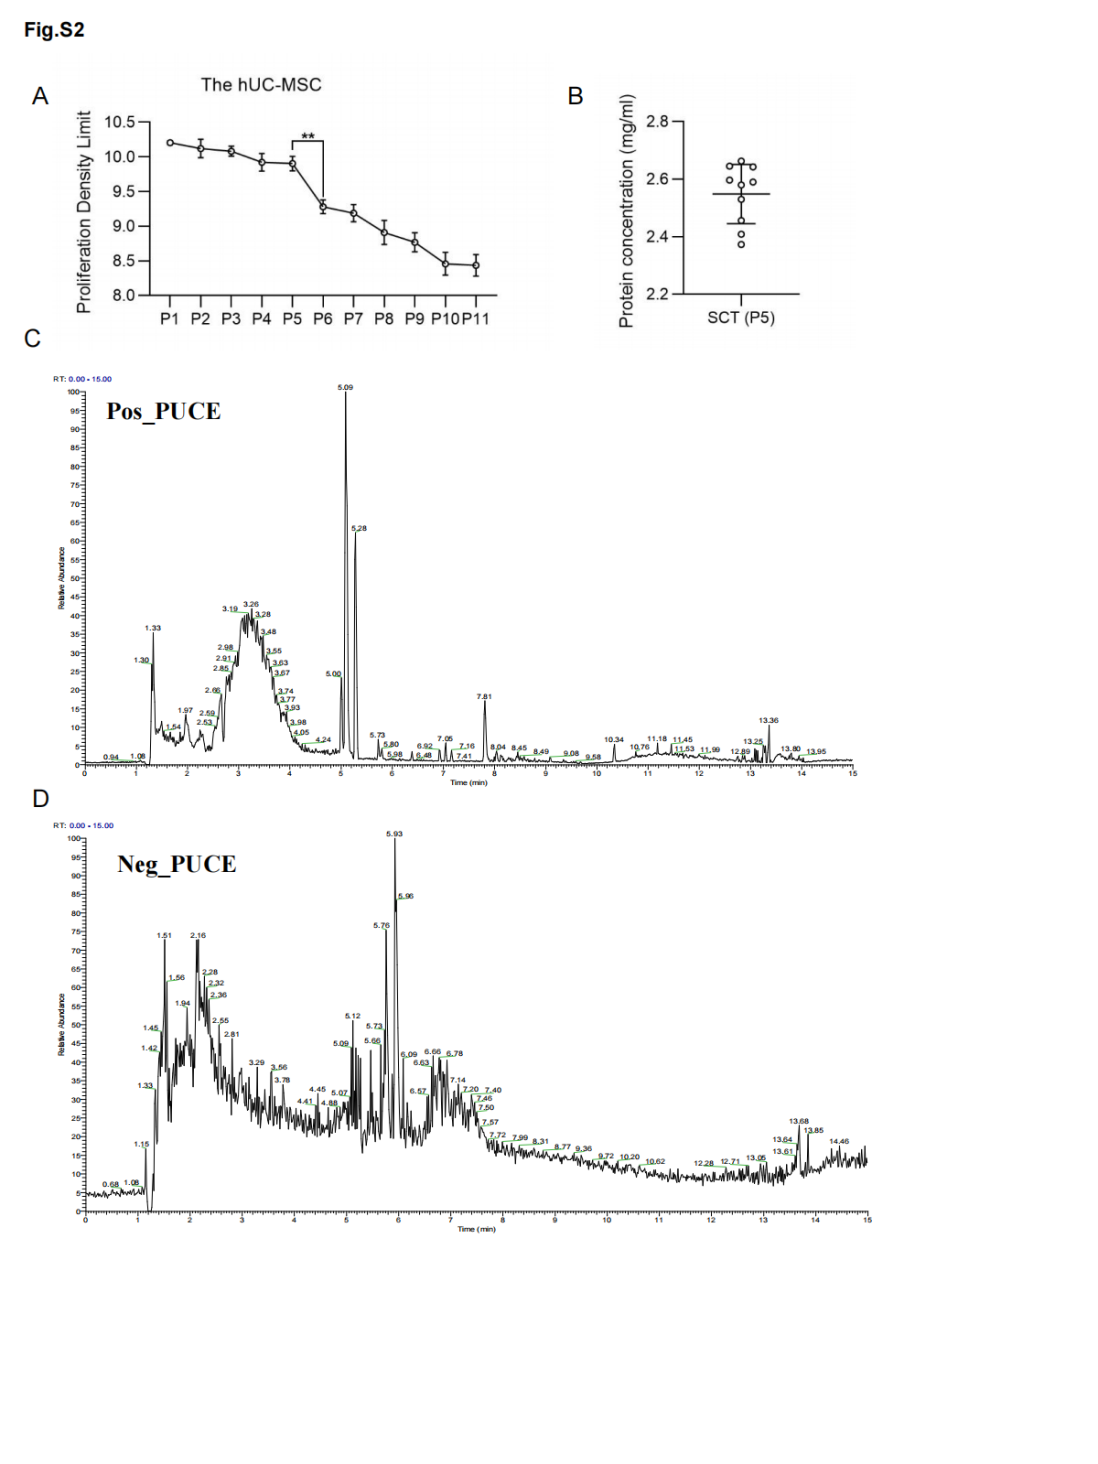
**

**eFig. 2. Proliferation density limit of hUC-MSCs and component analysis of secretome (SCT)**

(a) Proliferation density limit of P1–P11 generation hUC-MSCs, n = 3, ***p* < 0.01. (b) Protein concentration in different batches of P5 SCT, n = 10. (c, d) Positive ion pattern and negative ion base peak spectrum of SCT samples


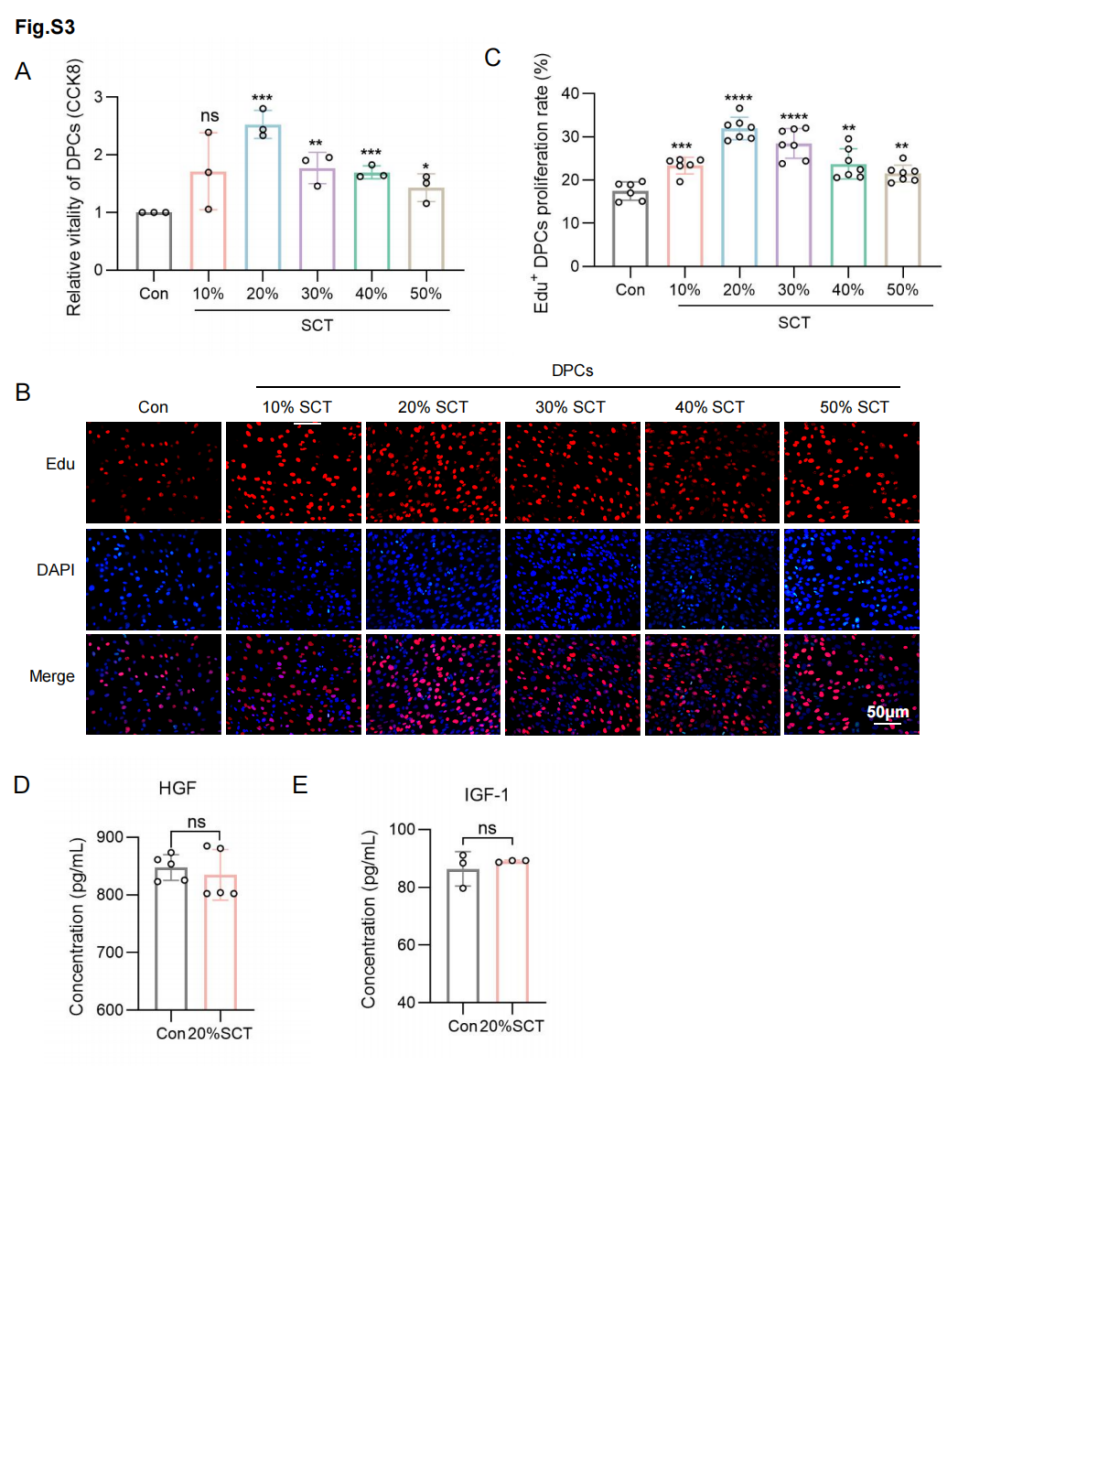


**eFig. 3. Effect of secretome (SCT) on dermal papillary cells (DPCs)**

(a) CCK8 statistics of DPCs treated with different concentrations of SCT. (b) EdU staining showing proliferation of DPCs treated with different concentrations of SCT. (c) Proliferation rate of EdU-positive cells, n = 7. (d) Hepatocyte growth factor concentration in the supernatant of DPCs 24 h after SCT treatment, measured using enzyme-linked immunosorbent assay (ELISA), n = 5. (e) IGF-1 concentration in the supernatant of DPCs 24 h after SCT treatment measured using ELISA, n = 3. Con, control. **p* <0.05, ***p* <0.01, ****p* < 0.001, **** *p* <0.0001, ns, *p* >0.05


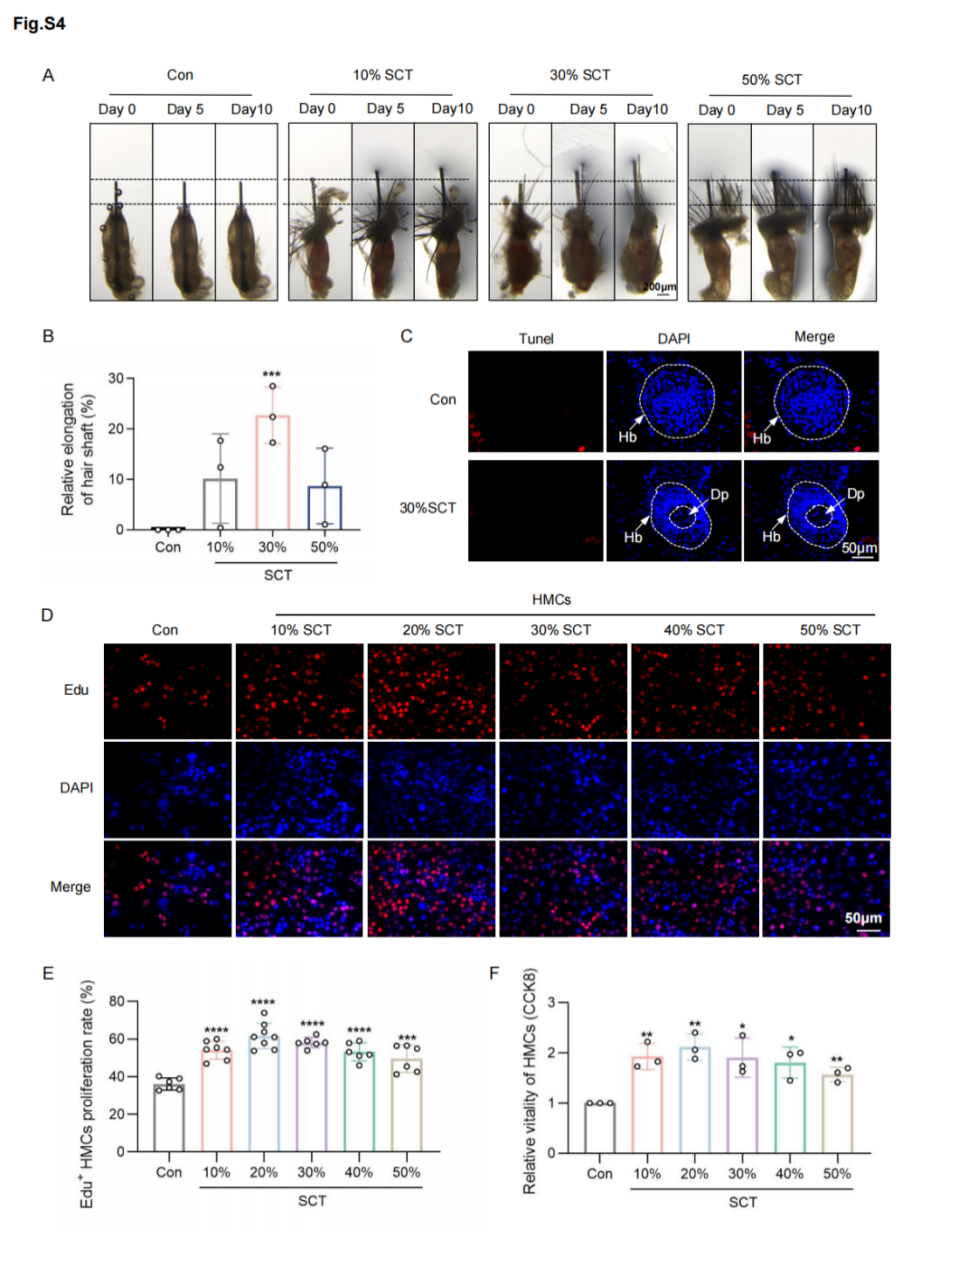


**eFig. 4. Effect of secretome (SCT) on mouse vibrissae and hair matrix cells (HMCs)**

(a) Hair follicle organs of mouse tentacles cultured *in vitro* and treated with 10%, 30%, and 50% SCT at 0, 5, and 10 d. (b) Relative hair elongation of vibrissae hair follicle organs cultured *in vitro*, n = 3. (c) TUNEL staining of apoptotic cells in the vibrissae hair follicle organs cultured *in vitro* using frozen sections on day 10. (d) EdU staining showing proliferation of HMCs treated with different concentrations of SCT. (e) Proliferation rate of EdU-positive cells, n = 6. (f) CCK8 results of HMCs treated with different concentrations of SCT (Dp, dermal papilla; Hb, hair bulb; Con, control group). **p* <0.05, ***p* <0.01, ****p* <0.001, *****p* <0.0001


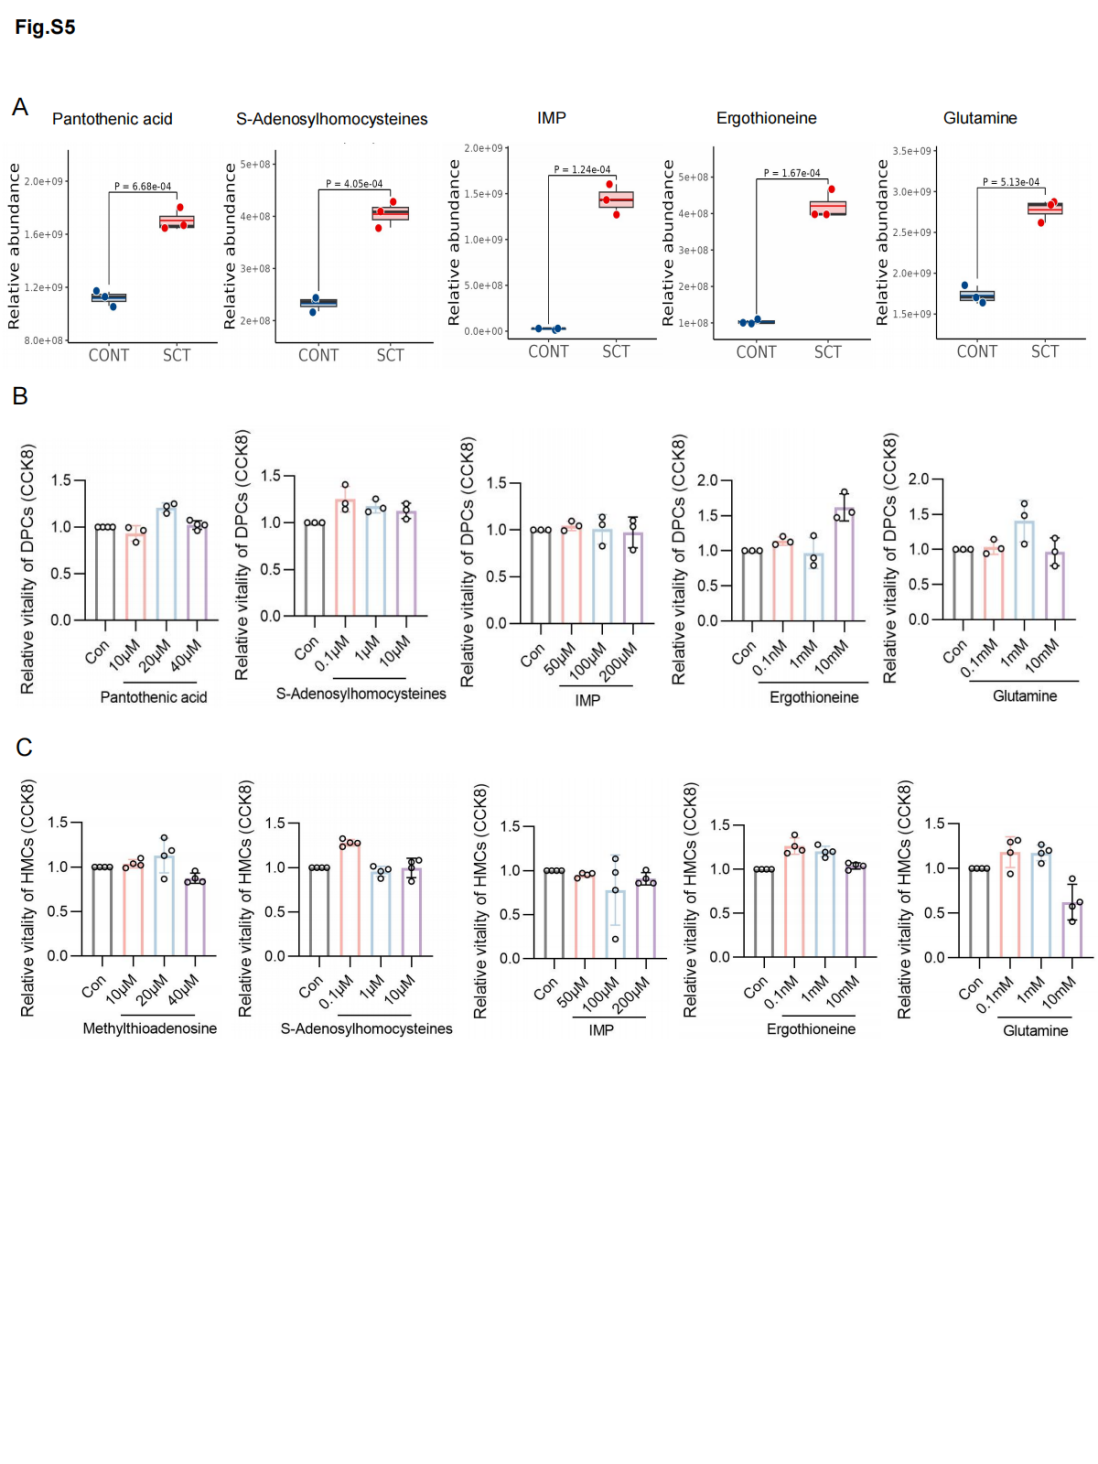


**eFig. 5.** **Effects of metabolomic metabolites on dermal papilla cells (DPCs) and hair matrix cells (HMCs)**

(a) Boxplots for quantification of pantothenic acid, S-adenosylhomocysteine, inosine monophosphate (IMP), ergothionine, and glutamine in control (CONT) and secretome (SCT) samples, n = 3. (b, c) CCK8 results of DPCs (b) and HMCs (c) treated with pantothenic acid, S-adenosylhomocysteine, IMP, ergothioneine, and glutamine, n = 3

**3. Online-Only Tables**

**eTable 1**. Non-targeted metabolomics and phosphorylated proteomics raw data from the human umbilical cord–mesenchymal stem cell (hUC-MSC) secretome (SCT)

**eTable 2**. Data-independent acquisition protein quantitative data statistics (n = 3) and protein concentration (n = 10)

|  | Protein (mean ± SD) | Peptide (mean ± SD) | Protein concentration (mean ± SD) |
| --- | --- | --- | --- |
| SCT | 183 ± 18 | 699 ± 40 | 2.548 ± 0.103 mg/mL |

SCT, secretome; SD, standard deviation

**eTable 3**. Hair cycle scores for telogen- and anagen-phase hair follicles in control and secretome (SCT) groups (n = 30)

| Group | Hair follicle stage | | | | | |
| --- | --- | --- | --- | --- | --- | --- |
| Telogen | Anagen I | Anagen II | Anagen III | Anagen IV–VI | Hair cycle score |
| Control | 9 | 19 | 1 | 1 | 0 | 0.80 |
| 100% SCT | 0 | 0 | 1 | 8 | 21 | 3.67* |

Telogen = factor 0; Anagen I = factor 1; Anagen II = factor 2; Anagen III = factor 3; Anagen IV–VI = factor 4; **p* <0.05; SCT, secretome

**eTable 4**. Parameters used to assess the model quality of partial least squares discriminant analysis (PLS-DA) (n = 3)

|  | R2X (cum) | R2Y (cum) | Q2 (cum) | RMSEE | pre | ort | pR2Y | pQ2 |
| --- | --- | --- | --- | --- | --- | --- | --- | --- |
| Total | 0.536 | 0.998 | 0.955 | 0.0281 | 1 | 0 | 0.115 | 0.115 |

**eTable 5**. Statistics of differential metabolite results (n = 3)

|  | Upregulation | Downregulation | Total |
| --- | --- | --- | --- |
| SCT vs. CON | 336 | 255 | 591 |

SCT, secretome; CON, control

**eTable 6.** Non-targeted metabolomics raw data from the skin tissue samples

**eTable 7.** Phosphorylated proteomics raw data from the skin tissue samples

**eTable 8.** Seven-point rating scale of trial subjects (n = 19)

|  | Seven-point rating scale | | |  | |
| --- | --- | --- | --- | --- | --- |
| Numbers | Reviewer 1 | Reviewer 2 | Reviewer 3 | | Mean |
| 1 | 2 | 2 | 3 | | 2.33 |
| 2 | 1 | 1 | 1 | | 1.00 |
| 3 | 3 | 0 | 1 | | 1.33 |
| 4 | 3 | 3 | 2 | | 2.67 |
| 5 | 1 | 1 | 2 | | 1.33 |
| 6 | 3 | 3 | 3 | | 3.00 |
| 7 | 2 | 3 | 2 | | 2.33 |
| 8 | 1 | 1 | 2 | | 1.33 |
| 9 | 1 | 2 | 1 | | 1.33 |
| 10 | 2 | 3 | 3 | | 2.67 |
| 11 | 2 | 0 | 2 | | 1.33 |
| 12 | 2 | 3 | 2 | | 2.33 |
| 13 | 2 | 2 | 2 | | 2.00 |
| 14 | 2 | 3 | 0 | | 1.67 |
| 15 | 1 | 0 | 1 | | 0.67 |
| 16 | 2 | 3 | 1 | | 2.00 |
| 17 | 2 | 2 | 2 | | 2.00 |
| 18 | 2 | 3 | 1 | | 2.00 |
| 19 | 1 | 0 | 1 | | 0.67 |

**eTable 9.** Parameters of trial subjects (n = 19)

| Parameters | Baseline | Month 3 | Month 3 − Baseline |
| --- | --- | --- | --- |
| Seven-point value rating scale | 0.00 | 1.79 ± 0.57 | 1.79 ± 0.57 |
| Hair follicle density (per cm2) | 81.95 ± 11.82 | 88.91 ± 14.56 | 6.96 ± 4.55 |
| Mean hair diameter (μm) | 64.43 ± 14.12 | 70.54 ± 12.89 | 6.11 ± 3.39 |
| Terminal hair percentage | 54.64 ± 23.75 | 64.00 ± 20.40 | 9.36 ± 8.06 |
| Vellus hair percentage | 11.30 ± 9.25 | 5.40 ± 3.79 | -5.90 ± 7.70 |
| Intermediate hair percentage | 34.06 ± 16.15 | 30.60 ± 18.11 | -3.46 ± 7.95 |
| Scalp transepidermal water loss (g/(m2h)) | 10.38 ± 2.38 | 9.16 ± 3.63 | -1.15 ± 3.11 |
| Scalp oil | 449.99 ± 157.93 | 423.72 ± 132.82 | -21.27 ± 123.82 |
| Scalp moisture | 10.57 ± 3.42 | 13.68 ± 3.62 | 2.69 ± 4.46 |
| Scalp PH | 6.04 ± 1.53 | 5.85 ± 0.58 | -0.18 ± 1.46 |
| Scalp elasticity | 75.79 ± 11.99 | 81.21 ± 7.82 | 4.98 ± 12.00 |
