# Supplementary material for: The human umbilical cord–mesenchymal stem cell secretome regulates hair growth and cycle transition by promoting methylthioadenosine synthesis via the PI3K/AKT/mTOR pathway
Source: Research Square preprint supplement (doi:10.21203/rs.3.rs-7150416/v1), 2025-08-07
Supplement: Supplementary file 4 [file baa1db787f0b9467f50e308e.xlsx]

## Sheet: all-M_z
Alignment ID	Metabolite name	Rt(min)	Expreiment Mz	Adduct type	Reference m/z	m/z matched	SCT1	SCT2	SCT3	CONT1	CONT2	CONT3	P.value	FC	Log2FC	Mean.CONT	SD.CONT	SE.CONT	CV.CONT	Mean.SCT	SD.SCT	SE.SCT	CV.SCT	FDR	OPLSDA.VIP	PLSDA.VIP	NLP	FORMULA	ONTOLOGY	INCHIKEY	SMILES	KEGGID	CID	HMDBID	Superclass	Class	Significant
NEG14133	LPI(18:2)	11.033	595.287	[M-H]-	595.288	True	1.53564e+07	6.65528e+06	111819	2.57921e+07	2.16778e+07	675765	0.387034	0.459513	-1.12182	1.60486e+07	1.34712e+07	7.77762e+06	83.9404	7.37451e+06	7.64772e+06	4.41541e+06	103.705	0.538062	0.597039	0.596636	0.41225	C27H49O12P	Glycerophospholipids	SAHCQBPGXQFTRA-FPKLTXOWSA-N	CCCCC\C=C/C\C=C/CCCCCCCC(=O)OC[C@@H](O)COP(O)(=O)O[C@H]1[C@H](O)[C@@H](O)[C@H](O)[C@@H](O)[C@H]1O	---	---	HMDB0240597	Lipids and lipid-like molecules	Glycerophospholipids	NoSig
POS1426	Methionine	2.413	150.058	[M+H]+	150.058	True	1.34252e+10	1.30326e+10	1.46488e+10	9.44765e+09	9.03972e+09	1.01011e+10	0.00193438	1.43787	0.523935	9.52949e+09	5.354e+08	3.09113e+08	5.61835	1.37022e+10	8.42998e+08	4.86705e+08	6.15229	0.00865865	1.31812	1.31798	2.71346	C5H11NO2S	Amino acids and derivatives	FFEARJCKVFRZRR-BYPYZUCNSA-N	O=C(O)C(N)CCSC	C00073	6137	HMDB0000696	Organic acids and derivatives	Carboxylic acids and derivatives	UP
NEG11304	LPE(P-16:0)	12.791	436.283	[M-H]-	436.283	True	1.14629e+08	1.12802e+08	8.49775e+07	8.26844e+07	6.3309e+07	8.58071e+07	0.0868407	1.34775	0.430552	7.72668e+07	1.21883e+07	7.03691e+06	15.7743	1.04136e+08	1.66171e+07	9.59391e+06	15.9571	0.16898	1.02398	1.02366	1.06128	C21H44NO6P	Glycerophospholipids	QYTPGOPLNFESQC-NUTQULCTSA-N	[H][C@@](O)(CO\C=C/CCCCCCCCCCCCCC)COP(O)(=O)OCCN	---	42607469;154573334	HMDB0011152	Lipids and lipid-like molecules	Glycerophospholipids	NoSig
NEG13862	LPI(16:0)	10.766	571.29	[M-H]-	571.288	True	1.25646e+07	8.18659e+06	7.31081e+07	3.24191e+07	2.67207e+07	1.03121e+08	0.519074	0.578447	-0.789743	5.40869e+07	4.25602e+07	2.45722e+07	78.6886	3.12864e+07	3.62847e+07	2.0949e+07	115.976	0.662809	0.454688	0.455225	0.284771	C25H49O12P	Glycerophospholipids	UOXRPRZMAROFPH-IESLQMLBSA-N	CCCCCCCCCCCCCCCC(=O)OC[C@@H](O)COP(O)(=O)O[C@H]1[C@H](O)[C@@H](O)[C@H](O)[C@@H](O)[C@H]1O	---	---	HMDB0061695	Lipids and lipid-like molecules	Glycerophospholipids	NoSig
NEG3392	3h-Indole-3-propanoic acid,a-amino-	7.091	203.082	[M-H]-	203.083	True	2.45857e+08	1.49022e+08	1.20039e+08	1.41015e+08	1.89641e+08	1.91971e+08	0.953602	0.985248	-0.0214412	1.74209e+08	2.87707e+07	1.66108e+07	16.5151	1.71639e+08	6.58879e+07	3.80404e+07	38.3875	0.981832	0.0421812	0.042309	0.0206326	C11H12N2O2	Indoles and derivatives	RDTOURARQPNLFK-UHFFFAOYSA-N	NC(CC1C=NC2=CC=CC=C12)C(O)=O	---	12998164	HMDB0246269	Organoheterocyclic compounds	Indoles and derivatives	NoSig
NEG14179	LPI(18:0)	13.526	599.321	[M-H]-	599.32	True	2.4173e+07	2.34745e+07	2.55766e+07	1.28874e+07	2.05909e+07	3.85321e+07	0.960215	1.01685	0.0241132	2.40035e+07	1.31585e+07	7.59709e+06	54.8194	2.4408e+07	1.07057e+06	618095	4.38615	0.986036	0.0367755	0.0362756	0.0176313	C27H53O12P	Glycerophospholipids	MXAFDFDAIFZFET-CZDOQZASSA-N	CCCCCCCCCCCCCCCCCC(=O)OC[C@@H](O)COP(O)(=O)O[C@H]1[C@H](O)[C@@H](O)[C@H](O)[C@@H](O)[C@H]1O	---	---	HMDB0240261	Lipids and lipid-like molecules	Glycerophospholipids	NoSig
POS1988	Arginine	1.277	175.119	[M+H]+	175.119	True	7.21732e+09	7.36091e+09	7.5963e+09	7.05593e+09	7.20855e+09	6.95285e+09	0.0746054	1.04511	0.0636604	7.07244e+09	1.28648e+08	7.4275e+07	1.81901	7.39151e+09	1.91334e+08	1.10467e+08	2.58857	0.147984	1.04955	1.0499	1.12723	C6H14N4O2	Amino acids and derivatives	ODKSFYDXXFIFQN-UHFFFAOYSA-N	C(C[C@@H](C(=O)O)N)CN=C(N)N	C00062	6322;28782	HMDB0000517	Organic acids and derivatives	Carboxylic acids and derivatives	NoSig
POS2137	Tyrosine	4.865	182.081	[M+H]+	182.081	True	6.40714e+08	1.17332e+09	2.28325e+09	5.56816e+08	3.35772e+09	6.00553e+08	0.900431	0.907465	-0.140085	1.50503e+09	1.60463e+09	9.26431e+08	106.618	1.36576e+09	8.38009e+08	4.83825e+08	61.3584	0.948557	0.0916244	0.0909	0.0455497	C9H11NO3	Amino acids and derivatives	OUYCCCASQSFEME-QMMMGPOBSA-N	C1=CC(=CC=C1C[C@@H](C(=O)O)N)O	C00082	6057;6942100	HMDB0000158	Organic acids and derivatives	Carboxylic acids and derivatives	NoSig
NEG2634	2-Hydroxy-3-(2-hydroxyphenyl)propanoic acid	7.272	181.05	[M-H]-	181.05	True	1.80585e+08	1.66829e+08	1.70843e+08	9.97528e+07	1.06853e+08	1.06033e+08	0.0001243	1.65768	0.729169	1.04213e+08	3.88443e+06	2.24268e+06	3.72739	1.72752e+08	7.0741e+06	4.08423e+06	4.09494	0.00151366	1.35493	1.35492	3.90553	C9H10O4	Phenylpropanoic acids	HXQBZGMVGIDZAJ-UHFFFAOYSA-N	OC(CC1=C(O)C=CC=C1)C(O)=O	---	3083977	HMDB0033624	Phenylpropanoids and polyketides	Phenylpropanoic acids	UP
POS9825	-Icosa-8,11,14,17-tetraenoylcarnitine	11.378	448.342	[M+H-H2O]+	448.343	True	3.69388e+08	3.71432e+08	3.92972e+08	1.17578e+08	1.1632e+08	9.89684e+07	1.01194e-05	3.40614	1.76814	1.10956e+08	1.04003e+07	6.00464e+06	9.37342	3.77931e+08	1.30665e+07	7.54393e+06	3.45737	0.000365737	1.3638	1.36383	4.99485	C27H45NO4	Fatty Acyls	VPEBWBVNBKLXSR-UHFFFAOYSA-N	CCC=CCC=CCC=CCC=CCCCCCCC(=O)OC(CC([O-])=O)C[N+](C)(C)C	---	---	HMDB0241588	Lipids and lipid-like molecules	Fatty Acyls	UP
NEG9969	(Z)-7-[(1R,2R,3R,5S)-2-(1,2-Dihydroxy-3-oxooctyl)-3,5-dihydroxycyclopentyl]hept-5-enoic acid	11.64	385.224	[M-H]-	385.223	True	2.08893e+07	2.74256e+07	2.59266e+07	2.03402e+07	2.33851e+07	2.36402e+07	0.364643	1.10207	0.140219	2.24552e+07	1.83607e+06	1.06006e+06	8.17661	2.47472e+07	3.42404e+06	1.97687e+06	13.8361	0.51693	0.62189	0.622107	0.438132	C20H34O7	Fatty Acyls	MUEUGPOTDVINAD-UHFFFAOYSA-N	CCCCCC(=O)C(O)C(O)C1C(O)CC(O)C1CC=CCCCC(O)=O	---	---	HMDB0244520	Lipids and lipid-like molecules	Fatty Acyls	NoSig
POS7778	3-Hydroxy-5,8-tetradecadienoylcarnitine	9.982	384.274	[M+CH3OH+H]+	384.275	True	4.17173e+07	4.30899e+07	4.2624e+07	3.22421e+07	3.21764e+07	3.54536e+07	0.00135023	1.27594	0.351565	3.32907e+07	1.87343e+06	1.08163e+06	5.62749	4.24771e+07	697986	402982	1.64321	0.00663607	1.32628	1.32615	2.86959	C21H37NO5	Fatty Acyls	LVNITLZCNUEXQK-QNCXCJACSA-N	CCCCC\C=C/C\C=C/C[C@@H](O)CC(=O)O[C@H](CC([O-])=O)C[N+](C)(C)C	---	156908011	HMDB0013332	Lipids and lipid-like molecules	Fatty Acyls	UP
NEG14158	LPI(18:1)	13.531	597.304	[M-H]-	597.304	True	8.54893e+06	5.04422e+06	3.96423e+06	1.29795e+07	1.78296e+07	1.55912e+07	0.00815177	0.378389	-1.40206	1.54668e+07	2.42744e+06	1.40148e+06	15.6946	5.85246e+06	2.39683e+06	1.38381e+06	40.9542	0.0257402	1.26539	1.2653	2.08875	C27H51O12P	Glycerophospholipids	UGDOFRYHDCDVHD-FRWBGTIISA-N	CCCCCCCC\C=C/CCCCCCCC(=O)OC[C@@H](O)COP(O)(=O)O[C@H]1[C@H](O)[C@@H](O)[C@H](O)[C@@H](O)[C@H]1O	---	---	HMDB0061693	Lipids and lipid-like molecules	Glycerophospholipids	DOWN
POS245	Methylpyrazine	2.748	95.0609	[M+H]+	95.0609	True	1.23684e+08	1.33423e+08	2.67244e+08	1.41795e+08	1.55943e+08	2.51652e+08	0.892086	0.954425	-0.0672969	1.8313e+08	5.9762e+07	3.45036e+07	32.6337	1.74784e+08	8.02207e+07	4.63155e+07	45.8972	0.942203	0.0981709	0.098544	0.0495934	C5H6N2	Diazines	CAWHJQAVHZEVTJ-UHFFFAOYSA-N	CC1=CN=CC=N1	---	7976	HMDB0033112	Organoheterocyclic compounds	Diazines	NoSig
POS3539	Anserine	1.296	241.129	[M+H]+	241.129	True	5.15146e+08	3.1785e+08	3.03104e+08	6.335e+08	2.95209e+08	2.94473e+08	0.836674	0.928807	-0.10655	4.07727e+08	1.95525e+08	1.12886e+08	47.9548	3.787e+08	1.18396e+08	6.83557e+07	31.2637	0.903993	0.149277	0.149481	0.0774436	C10H16N4O3	Hybrid peptides	MYYIAHXIVFADCU-QMMMGPOBSA-N	CN1C=NC=C1C[C@H](NC(=O)CCN)C(O)=O	C01262	112072;6992114	HMDB0000194	Organic acids and derivatives	Peptidomimetics	NoSig
POS2821	N-Acetyl-3-methylhistidine	1.295	212.103	[M+NH4]+	212.104	True	8.64324e+07	8.73823e+07	9.49326e+07	8.17908e+07	8.17432e+07	7.10186e+07	0.0636816	1.14579	0.196339	7.81842e+07	6.20563e+06	3.58282e+06	7.93719	8.95825e+07	4.65766e+06	2.6891e+06	5.1993	0.131681	1.0747	1.07503	1.19599	C9H13N3O3	Carboxylic acids and derivatives	FKTXRTPBUWLETL-QMMMGPOBSA-N	CN1C=NC=C1C[C@H](NC(C)=O)C(O)=O	---	193270	HMDB0240341	Organic acids and derivatives	Carboxylic acids and derivatives	NoSig
NEG2407	N-Acetylaspartic acid	1.968	174.04	[M-H]-	174.041	True	2.42545e+09	2.83856e+09	2.47037e+09	1.34703e+09	2.76568e+09	2.65903e+09	0.536008	1.14215	0.191758	2.25725e+09	7.90071e+08	4.56147e+08	35.0015	2.57813e+09	2.26657e+08	1.30861e+08	8.79154	0.675957	0.437718	0.437944	0.270829	C6H9NO5	Amino acids and derivatives	OTCCIMWXFLJLIA-BYPYZUCNSA-N	O=C(N[C@H](C(=O)O)CC(=O)O)C	C01042	97508	HMDB0000812	Organic acids and derivatives	Carboxylic acids and derivatives	NoSig
POS2786	Minoxidil	7.783	210.135	[M+H]+	210.135	True	3.87281e+07	4.44006e+07	4.48566e+07	3.92006e+07	4.12878e+07	4.42821e+07	0.68581	1.02577	0.0367015	4.15902e+07	2.55424e+06	1.47469e+06	6.14145	4.26618e+07	3.41431e+06	1.97125e+06	8.00321	0.792123	0.290871	0.290796	0.163796	C9H15N5O	Tertiary amines	ZIMGGGWCDYVHOY-UHFFFAOYSA-N	C1CCN(CC1)C2=NC(=N)N(C(=C2)N)O	---	4201	HMDB0014494	Organic nitrogen compounds	Organonitrogen compounds	NoSig
POS5398	N-Acetylaspartylglutamic acid	5.267	305.097	[M+H]+	305.098	True	1.81208e+08	1.84617e+08	8.32653e+07	2.4116e+08	1.9017e+08	2.00496e+08	0.172258	0.710782	-0.492521	2.10609e+08	2.69575e+07	1.55639e+07	12.7998	1.49697e+08	5.75566e+07	3.32303e+07	38.4488	0.294817	0.87323	0.873296	0.76382	C11H16N2O8	Peptides	OPVPGKGADVGKTG-BQBZGAKWSA-N	O=C(O)CCC(N=C(O)C(N=C(O)C)CC(=O)O)C(=O)O	C12270	188803	HMDB0001067	Organic acids and derivatives	Carboxylic acids and derivatives	NoSig
NEG7774	Pseudouridine 5'-phosphate	1.831	323.028	[M-H]-	323.028	True	4.63239e+08	3.76015e+08	3.73341e+08	1.15086e+08	1.75557e+08	2.23386e+07	0.00496026	3.87434	1.95395	1.04327e+08	7.71736e+07	4.45562e+07	73.9728	4.04198e+08	5.11483e+07	2.95305e+07	12.6543	0.0174179	1.28779	1.28798	2.3045	C9H13N2O9P	Organooxygen compounds	MOBMOJGXNHLLIR-GBNDHIKLSA-N	O[C@H]1[C@@H](O)[C@@H](O[C@@H]1COP(O)(O)=O)C1=CNC(=O)NC1=O	C01168	439424	HMDB0001271	Organic oxygen compounds	Organooxygen compounds	UP
POS3740	3-Hydroxybutyrylcarnitine	4.927	248.149	[M+H]+	248.15	True	9.23025e+07	8.73365e+07	1.19932e+08	5.77021e+07	4.66011e+07	8.72182e+07	0.084859	1.56417	0.645395	6.38405e+07	2.09928e+07	1.21202e+07	32.8832	9.98572e+07	1.75621e+07	1.01395e+07	17.5872	0.166182	1.02822	1.02779	1.0713	C11H21NO5	Fatty Acyls	UEFRDQSMQXDWTO-BDAKNGLRSA-N	C[C@@H](O)CC(=O)O[C@@H](CC([O-])=O)C[N+](C)(C)C	---	156908001	HMDB0013127	Lipids and lipid-like molecules	Fatty Acyls	NoSig
POS5667	9-Decenoylcarnitine	9.476	314.232	[M+NH4]+	314.233	True	4.77326e+07	3.96889e+07	5.49854e+07	2.49597e+07	2.79435e+07	2.74174e+07	0.0101347	1.77298	0.826177	2.67735e+07	1.59273e+06	919561	5.94889	4.7469e+07	7.65169e+06	4.41771e+06	16.1194	0.0309615	1.25343	1.25339	1.99419	C17H31NO4	Fatty Acyls	GOOOCIIXFLVRAG-UHFFFAOYSA-N	C[N+](C)(C)CC(CC([O-])=O)OC(=O)CCCCCCCC=C	---	53481651	HMDB0013205	Lipids and lipid-like molecules	Fatty Acyls	UP
POS3017	Pantothenic acid	6.992	220.118	[M+H]+	220.118	True	1.64008e+09	1.80816e+09	1.66183e+09	1.06028e+09	1.12745e+09	1.16635e+09	0.000667595	1.52354	0.607427	1.11803e+09	5.36592e+07	3.09802e+07	4.79946	1.70336e+09	9.14144e+07	5.27782e+07	5.36672	0.00399763	1.33841	1.33843	3.17549	C9H17NO5	Secondary alcohols	GHOKWGTUZJEAQD-ZETCQYMHSA-N	CC(C)(CO)[C@H](C(=O)NCCC(=O)O)O	C00864	988	HMDB0000210	Organic oxygen compounds	Organooxygen compounds	UP
POS121	Cyclopentylamine	3.854	86.097	[M+H]+	86.0964	True	2.3865e+09	6.75348e+09	7.14233e+09	3.80442e+09	7.62179e+09	3.07442e+09	0.789087	1.12287	0.16719	4.83354e+09	2.44212e+09	1.40996e+09	50.5245	5.42743e+09	2.6407e+09	1.52461e+09	48.6546	0.874074	0.192851	0.193559	0.102875	C5H11N	Organonitrogen compounds	NISGSNTVMOOSJQ-UHFFFAOYSA-N	NC1CCCC1	---	2906	HMDB0250671	Organic nitrogen compounds	Organonitrogen compounds	NoSig
POS15724	Glutathione (oxidized)	6.693	613.159	[M+H]+	613.159	True	6.73307e+08	6.69889e+08	7.93573e+08	2.12773e+08	2.53533e+08	2.31702e+08	0.000346321	3.06124	1.61412	2.32669e+08	2.03971e+07	1.17763e+07	8.76657	7.12256e+08	7.04427e+07	4.06701e+07	9.89007	0.00259634	1.34653	1.34655	3.46052	C20H32N6O12S2	Peptides	YPZRWBKMTBYPTK-BJDJZHNGSA-N	O=C(O)CN=C(O)C(N=C(O)CCC(N)C(=O)O)CSSCC(N=C(O)CCC(N)C(=O)O)C(O)=NCC(=O)O	C00127	65359;11215652	HMDB0003337	Organic acids and derivatives	Carboxylic acids and derivatives	UP
NEG1625	3-methylmalate(2-)	2.177	147.029	[M-H]-	147.029	True	2.30287e+08	2.29088e+08	2.33855e+08	1.81843e+08	1.68974e+08	1.81905e+08	0.000294714	1.3013	0.379949	177574205	7.44813e+06	4.30018e+06	4.19438	2.31077e+08	2.47951e+06	1.43155e+06	1.07302	0.00235386	1.3483	1.34817	3.5306	C5H8O5	Fatty Acyls	NPYQJIHHTGFBLN-UHFFFAOYSA-N	CC(C(O)C(O)=O)C(O)=O	---	558882	HMDB0062739	Lipids and lipid-like molecules	Fatty Acyls	UP
NEG14453	LPI(20:4)	10.958	619.29	[M-H]-	619.288	True	1.30374e+08	3.34528e+07	5.81319e+06	1.17541e+08	1.14305e+08	6.06112e+06	0.687667	0.713047	-0.487931	7.93026e+07	6.34496e+07	3.66327e+07	80.0095	5.65465e+07	6.54126e+07	3.7766e+07	115.679	0.792123	0.289349	0.289023	0.162622	C29H49O12P	Glycerophospholipids	LXUGKKVCSTYZFK-YPTWYXPQSA-N	CCCCC\C=C/C\C=C/C\C=C/C\C=C/CCCC(=O)OC[C@@H](O)COP(O)(=O)O[C@H]1[C@H](O)[C@@H](O)[C@H](O)[C@@H](O)[C@H]1O	---	---	HMDB0061690	Lipids and lipid-like molecules	Glycerophospholipids	NoSig
NEG14449	LPI(20:4)	9.784	619.288	[2M-H]-	619.288	True	6.92709e+06	1.59315e+07	1.30811e+06	4.36882e+06	1.8896e+07	1.7759e+06	0.967978	0.965098	-0.0512522	8.3469e+06	9.22731e+06	5.32739e+06	110.548	8.05558e+06	7.37674e+06	4.25897e+06	91.5731	0.988752	0.0299601	0.0291954	0.0141345	C29H49O12P	Glycerophospholipids	LXUGKKVCSTYZFK-YPTWYXPQSA-N	CCCCC\C=C/C\C=C/C\C=C/C\C=C/CCCC(=O)OC[C@@H](O)COP(O)(=O)O[C@H]1[C@H](O)[C@@H](O)[C@H](O)[C@@H](O)[C@H]1O	---	---	HMDB0061690	Lipids and lipid-like molecules	Glycerophospholipids	NoSig
POS4127	Glutamylleucine	7.205	261.145	[M+H]+	261.144	True	3.56392e+08	3.27154e+08	3.1609e+08	2.02686e+08	2.43348e+08	2.31733e+08	0.00325947	1.4749	0.560613	2.25922e+08	2.09442e+07	1.20921e+07	9.27053	3.33212e+08	2.08227e+07	1.2022e+07	6.24909	0.0127255	1.3031	1.30314	2.48685	C11H20N2O5	Peptides	MYFMARDICOWMQP-JAMMHHFISA-N	O=C(O)C(N=C(O)CCC(N)C(=O)O)CC(C)C	---	151023	HMDB0011171	Organic acids and derivatives	Carboxylic acids and derivatives	UP
NEG4887	cyclic 6-Hydroxymelatonin	8.818	245.093	[M-H]-	245.093	True	2.29579e+07	2.06113e+07	1.89179e+07	1.20595e+07	1.36447e+07	1.32936e+07	0.00347443	1.60232	0.680164	1.29993e+07	832555	480676	6.40462	2.0829e+07	2.02877e+06	1.17131e+06	9.7401	0.0133514	1.30104	1.30103	2.45912	C13H14N2O3	Indoles and derivatives	FQZIOEARFRBPDV-UHFFFAOYSA-N	COC1=CC2=C(NC3=C2CCN3C(C)=O)C=C1O	---	131769959	HMDB0060810	Organoheterocyclic compounds	Indoles and derivatives	UP
POS4595	D-gamma-Glutamyl-D-glutamic acid	2.162	277.103	[M+NH4]+	277.103	True	1.45538e+08	1.28812e+08	1.37189e+08	1.80853e+08	1.42294e+08	1.6307e+08	0.109708	0.84641	-0.240571	1.62072e+08	1.92992e+07	1.11424e+07	11.9078	1.3718e+08	8.36293e+06	4.82834e+06	6.09633	0.204676	0.978285	0.978715	0.959763	C10H16N2O7	Carboxylic acids and derivatives	OWQDWQKWSLFFFR-UHFFFAOYSA-N	NC(CCC(=O)NC(CCC(O)=O)C(O)=O)C(O)=O	---	558343	HMDB0250751	Organic acids and derivatives	Carboxylic acids and derivatives	NoSig
NEG4791	Uridine	4.592	243.061	[M-H]-	243.062	True	3.04555e+09	5.67796e+09	6.28289e+09	4.45108e+09	4.16025e+09	4.82462e+09	0.63231	1.11689	0.159481	4.47865e+09	3.33046e+08	1.92284e+08	7.43632	5.00214e+09	1.72124e+09	9.93756e+08	34.41	0.750178	0.342313	0.342334	0.19907	C9H12N2O6	Pyrimidine nucleosides	DRTQHJPVMGBUCF-UHFFFAOYSA-N	O=C1N=C(O)C=CN1C2OC(CO)C(O)C2O	C00299	6029	HMDB0000296	Nucleosides, nucleotides, and analogues	Pyrimidine nucleosides	NoSig
NEG7660	12 Hydroxy arachidonic acid	12.605	319.228	[M-H]-	319.228	True	2.3074e+08	2.16662e+08	2.11232e+08	6.64797e+08	6.55235e+08	7.14131e+08	1.80535e-05	0.323786	-1.62689	6.78054e+08	3.16069e+07	1.82483e+07	4.66141	2.19544e+08	1.00686e+07	5.81313e+06	4.58615	0.000501395	1.36257	1.36264	4.74344	C20H32O3	Fatty Acyls	HVRRTPWRYUQZPF-RMOYYRCGSA-N	CCCCC\C=C/C\C(O)=C/C\C=C/C\C=C\CCCC(O)=O	---	131769822	HMDB0060101	Lipids and lipid-like molecules	Fatty Acyls	DOWN
NEG8171	8alpha-8-Hydroxy-12-oxo-13-abieten-18-oic acid	11.71	333.207	[M-H]-	333.207	True	5.27435e+07	8.07787e+07	4.11761e+07	6.98249e+07	7.68909e+07	8.49454e+07	0.204616	0.754111	-0.407151	7.72204e+07	7.56562e+06	4.36801e+06	9.79744	5.82328e+07	2.03639e+07	1.17571e+07	34.9699	0.332501	0.82532	0.825266	0.689061	C20H30O4	Prenol lipids	BDGVLOCEQIJJDJ-UHFFFAOYSA-N	CC(C)C1=CC2(O)CCC3C(C)(CCCC3(C)C(O)=O)C2CC1=O	---	245310	HMDB0035878	Lipids and lipid-like molecules	Prenol lipids	NoSig
POS8936	gamma-linolenyl carnitine	11.154	422.325	[M+H]+	422.327	True	3.64118e+07	3.63184e+07	3.43328e+07	1.56391e+07	1.83989e+07	1.39732e+07	0.000174094	2.22996	1.15702	1.60037e+07	2.23529e+06	1.29055e+06	13.9673	3.56877e+07	1.17433e+06	678000	3.29058	0.00177286	1.35251	1.35262	3.75922	C25H43NO4	Fatty Acyls	YCINYVPLUUGAJO-BAHSRKMSSA-N	CCCCC\C=C/C\C=C/C\C=C/CCCCC(=O)O[C@@H](CC([O-])=O)C[N+](C)(C)C	---	134812245	HMDB0006318	Lipids and lipid-like molecules	Fatty Acyls	UP
NEG7657	Valproic acid glucuronide	7.747	319.14	[2M-H]-	319.139	True	5.4341e+06	5.88485e+06	6.09768e+06	3.44803e+06	3.45962e+06	3.26197e+06	0.000301542	1.71261	0.776199	3.38988e+06	110917	64037.8	3.272	5.80554e+06	338825	195621	5.83623	0.00237732	1.34789	1.34795	3.52065	C14H24O8	Organooxygen compounds	XXKSYIHWRBBHIC-JVWRJRKNSA-N	CCCC(CCC)C(=O)O[C@@H]1O[C@@H]([C@@H](O)[C@H](O)[C@H]1O)C(O)=O	C07185	88111	HMDB0000901	Organic oxygen compounds	Organooxygen compounds	UP
POS9075	Oleoylcarnitine	11.655	426.358	[M+CH3OH+H]+	426.358	True	1.03016e+09	1.06562e+09	1.07856e+09	7.27581e+08	8.44785e+08	7.52748e+08	0.00181314	1.36524	0.449153	7.75038e+08	6.16995e+07	3.56222e+07	7.96083	1.05811e+09	2.50577e+07	1.44671e+07	2.36815	0.00820613	1.31937	1.31956	2.74157	C25H47NO4	Fatty Acyls	IPOLTUVFXFHAHI-WHIOSMTNSA-N	CCCCCCCCC=CCCCCCCCC(=O)OC(CC([O-])=O)C[N+](C)(C)C	---	166951	HMDB0005065	Lipids and lipid-like molecules	Fatty Acyls	UP
POS11458	LPC(16:0)	12.613	496.34	[M+H]+	496.34	True	1.00705e+10	1.13267e+10	9.30584e+09	4.65027e+09	4.52233e+09	4.71868e+09	0.000694301	2.21024	1.1442	4.63042e+09	9.96689e+07	5.75439e+07	2.15248	1.02344e+10	1.02035e+09	5.89098e+08	9.96982	0.00411862	1.33784	1.33786	3.15845	C24H50NO7P	Glycerophospholipids	NEGQHKSYEYVFTD-HSZRJFAPSA-N	CCCCCCCCCCCCCCCC(=O)O[C@H](CO)COP([O-])(=O)OCC[N+](C)(C)C	---	15061532	HMDB0240262	Lipids and lipid-like molecules	Glycerophospholipids	UP
POS1163	Urocanic acid	2.732	139.05	[M+H]+	139.05	True	2.33738e+10	2.36447e+10	2.87807e+10	3.11237e+10	2.85149e+10	2.74896e+10	0.141421	0.869972	-0.200959	2.90428e+10	1.8737e+09	1.08178e+09	6.45151	2.52664e+10	3.04646e+09	1.75887e+09	12.0574	0.252655	0.922772	0.922737	0.849487	C6H6N2O2	Imidazoles	LOIYMIARKYCTBW-OWOJBTEDSA-N	O=C(O)C=CC1=CN=CN1	C00785	---	HMDB0000301	Organoheterocyclic compounds	Azoles	NoSig
NEG8129	Glutamyltryptophan	6.977	332.125	[M-H]-	332.125	True	1.80425e+07	1.69674e+07	1.65149e+07	9.511e+06	1.1823e+07	1.20474e+07	0.00286954	1.54352	0.626223	1.11271e+07	1.4041e+06	810658	12.6187	1.71749e+07	784656	453021	4.56861	0.0115348	1.30714	1.30713	2.54219	C16H19N3O5	Peptides	LLEUXCDZPQOJMY-AAEUAGOBSA-N	N[C@@H](CCC(O)=O)C(=O)N[C@@H](CC1=CNC2=CC=CC=C12)C(O)=O	---	100094	HMDB0028830	Organic acids and derivatives	Carboxylic acids and derivatives	UP
NEG7065	N-Acetylaspartylglutamic acid	4.059	303.083	[M-H]-	303.083	True	9.49935e+07	1.4932e+08	1.9382e+08	3.10037e+07	1.28953e+08	8.07781e+07	0.177024	1.81998	0.863926	8.02449e+07	4.89767e+07	2.82767e+07	61.0341	1.46044e+08	4.94945e+07	2.85757e+07	33.8901	0.300063	0.865651	0.866001	0.751969	C11H16N2O8	Peptides	OPVPGKGADVGKTG-BQBZGAKWSA-N	O=C(O)CCC(N=C(O)C(N=C(O)C)CC(=O)O)C(=O)O	C12270	188803	HMDB0001067	Organic acids and derivatives	Carboxylic acids and derivatives	NoSig
POS8742	3-Hydroxyhexadecanoylcarnitine	11.051	416.337	[M+CH3OH+H]+	416.338	True	1.5241e+08	1.6588e+08	1.5457e+08	1.50217e+08	1.45905e+08	1.40478e+08	0.0744397	1.08305	0.115099	1.45533e+08	4.88024e+06	2.81761e+06	3.35335	1.5762e+08	7.2342e+06	4.17667e+06	4.58965	0.147984	1.05	1.05027	1.1282	C23H45NO5	Fatty Acyls	XKAZIAFZAQAHHG-BPGUCPLFSA-N	CCCCCCCCCCCCCC(O)CC(=O)O[C@H](CC([O-])=O)C[N+](C)(C)C	---	126456228	HMDB0013336	Lipids and lipid-like molecules	Fatty Acyls	NoSig
POS9884	Icosa-5,8,11-trienoylcarnitine	11.538	450.357	[M+Na]+	450.358	True	3.84172e+07	3.75926e+07	4.1725e+07	1.49022e+07	9.47792e+06	8.95127e+06	0.000249078	3.53225	1.82059	1.11104e+07	3.29425e+06	1.90194e+06	29.6501	3.92449e+07	2.18703e+06	1.26268e+06	5.57278	0.0021874	1.34974	1.34972	3.60366	C27H47NO4	Fatty Acyls	DBCKADUSYJAPII-UHFFFAOYSA-N	CCCCCCCCC=CCC=CCC=CCCCC(=O)OC(CC([O-])=O)C[N+](C)(C)C	---	---	HMDB0241579	Lipids and lipid-like molecules	Fatty Acyls	UP
NEG5106	N-lactoyl-Tyrosine	7.422	252.087	[M-H]-	252.087	True	5.58145e+06	5.0398e+06	5.75685e+06	5.37977e+06	5.46328e+06	5.50706e+06	0.968064	1.00171	0.00246747	5.45004e+06	64667.8	37335.9	1.18656	5.45937e+06	373784	215804	6.84666	0.988752	0.0293565	0.0291169	0.0140959	C12H15NO5	Carboxylic acids and derivatives	XBOGARDIMVJTKF-XVKPBYJWSA-N	C[C@H](O)C(=O)N[C@@H](CC1=CC=C(O)C=C1)C(O)=O	---	57329379	HMDB0062177	Organic acids and derivatives	Carboxylic acids and derivatives	NoSig
POS9548	(11E,13Z)-10-Hydroxyoctadeca-11,13-dienoylcarnitine	10.909	440.336	[M+H-H2O]+	440.338	True	1.08798e+08	1.11371e+08	1.09339e+08	8.28597e+07	9.06402e+07	8.31121e+07	0.000808333	1.28407	0.360728	8.55373e+07	4.42097e+06	2.55245e+06	5.16847	1.09836e+08	1.35627e+06	783045	1.23481	0.00459434	1.33534	1.33552	3.09241	C25H45NO5	Fatty Acyls	PGOWXCBADQKSCL-UHFFFAOYSA-N	CCCCC=CC=CC(O)CCCCCCCCC(=O)OC(CC([O-])=O)C[N+](C)(C)C	---	---	HMDB0241544	Lipids and lipid-like molecules	Fatty Acyls	UP
POS9689	12-Hydroxy-12-octadecanoylcarnitine	11.544	444.369	[M+NH4]+	444.369	True	7.40844e+07	8.10256e+07	7.89131e+07	3.59492e+07	2.76227e+07	3.07125e+07	0.000126712	2.4821	1.31156	3.14281e+07	4.20913e+06	2.43014e+06	13.3929	7.80077e+07	3.55809e+06	2.05426e+06	4.5612	0.00151366	1.35482	1.3548	3.89718	C25H49NO5	Fatty Acyls	QAIWREXEZLJMTC-UHFFFAOYSA-N	CCCCCCC(O)CCCCCCCCCCC(=O)OC(CC([O-])=O)C[N+](C)(C)C	---	53481632	HMDB0013154	Lipids and lipid-like molecules	Fatty Acyls	UP
POS2406	5,6-Dihydroxy-2-methylaminotetralin	6.737	194.118	[M+H]+	194.118	True	5.43054e+08	7.33904e+08	6.55642e+08	8.14793e+08	8.459e+08	7.04265e+08	0.10898	0.817181	-0.291272	7.88319e+08	7.44361e+07	4.29757e+07	9.44238	6.442e+08	9.5938e+07	5.53898e+07	14.8926	0.203942	0.98055	0.980076	0.962651	C11H15NO2	Tetralins	BHDFPNRSDABMPW-UHFFFAOYSA-N	CNC1CCC2=C(C1)C=CC(O)=C2O	---	38005	HMDB0246248	Benzenoids	Tetralins	NoSig
POS3540	Balenine	1.53	241.129	[M+H-H2O]+	241.13	True	2.19501e+08	1.70574e+08	1.71172e+08	3.88969e+07	1.55292e+08	1.48479e+08	0.150579	1.63788	0.711826	1.14223e+08	6.53228e+07	3.77141e+07	57.189	1.87082e+08	2.80772e+07	1.62104e+07	15.0079	0.265907	0.907566	0.907613	0.822236	C10H16N4O3	Peptidomimetics	SLRNWACWRVGMKD-QMMMGPOBSA-N	CN1C=NC(C[C@H](NC(=O)CCN)C(O)=O)=C1	---	10198648;90658938	HMDB0005769	Organic acids and derivatives	Peptidomimetics	NoSig
POS12982	LPC(20:5)	11.828	542.324	[2M+H]+	542.325	True	1.75292e+08	1.84016e+08	1.6581e+08	9.64106e+07	9.75278e+07	9.87765e+07	0.000127584	1.79396	0.843144	9.75716e+07	1.18356e+06	683329	1.21302	1.75039e+08	9.1057e+06	5.25718e+06	5.20209	0.00151366	1.35474	1.35475	3.8942	C28H48NO7P	Glycerophospholipids	PDIGSOAOQOXRDU-WJPZTBRDSA-N	CC\C=C/C\C=C/C\C=C/C\C=C/C\C=C/CCCC(=O)OC[C@](O)([H])COP([O-])(=O)OCC[N+](C)(C)C	---	11757087	HMDB0010397	Lipids and lipid-like molecules	Glycerophospholipids	UP
POS7043	2-Hydroxylauroylcarnitine	9.894	360.273	[M+H]+	360.275	True	3.48262e+07	3.15842e+07	3.87627e+07	2.71954e+07	2.70407e+07	2.88263e+07	0.0266872	1.26619	0.340499	2.76874e+07	989312	571180	3.57314	3.50577e+07	3.59486e+06	2.0755e+06	10.2541	0.0665545	1.18086	1.1807	1.5737	C19H37NO5	Fatty Acyls	PBBJEGGNZPXIGJ-UHFFFAOYSA-N	CCCCCCCCCCC(O)C(=O)OC(CC([O-])=O)C[N+](C)(C)C	---	53481640	HMDB0013164	Lipids and lipid-like molecules	Fatty Acyls	UP
POS6285	N6-Isopentenyladenosine	8.44	336.167	[M+H]+	336.167	True	4.12075e+07	4.21147e+07	4.02679e+07	1.93112e+07	2.17377e+07	1.88354e+07	3.46186e-05	2.06381	1.04531	1.99614e+07	1.55658e+06	898692	7.79793	4.11967e+07	923445	533151	2.24155	0.000671491	1.36073	1.36081	4.46069	C15H21N5O4	Purine nucleosides	USVMJSALORZVDV-UHFFFAOYSA-N	[H][C@@]1(CO)O[C@]([H])(N2C=NC3=C(NCC=C(C)C)N=CN=C23)[C@@]([H])(O)[C@@]1([H])O	C16427	---	HMDB0304396	Nucleosides, nucleotides, and analogues	Purine nucleosides	UP
POS2681	Tryptophan	7.18	205.097	[M+H]+	205.097	True	9.56561e+09	1.02064e+10	1.03282e+10	8.19134e+09	8.54357e+09	8.72629e+09	0.00551748	1.1822	0.241476	8.48707e+09	2.71918e+08	1.56992e+08	3.20391	1.00334e+10	4.09688e+08	2.36534e+08	4.08324	0.0190721	1.28357	1.28359	2.25826	C11H12N2O2	Amino acids and derivatives	QIVBCDIJIAJPQS-VIFPVBQESA-N	O=C(O)C(N)CC1=CNC=2C=CC=CC21	C00078	---	HMDB0000929	Organoheterocyclic compounds	Indoles and derivatives	UP
POS4737	Oleamide	12.479	282.279	[M+NH4]+	282.279	True	3.81497e+07	2.35872e+08	2.08678e+08	2.49517e+07	1.46775e+08	1.52058e+08	0.516399	1.4908	0.576089	1.07928e+08	7.19084e+07	4.15163e+07	66.6261	1.609e+08	1.07171e+08	6.1875e+07	66.6071	0.660083	0.45774	0.457969	0.287015	C18H35NO	Fatty Acyls	FATBGEAMYMYZAF-KTKRTIGZSA-N	CCCCCCCCC=CCCCCCCCC(N)=O	C19670	1930	HMDB0002117	Lipids and lipid-like molecules	Fatty Acyls	NoSig
POS12332	LPC(18:1)	12.871	522.357	[M+Na]+	522.356	True	1.41569e+09	1.60788e+09	1.49661e+09	5.76616e+08	5.97319e+08	7.37832e+08	0.000321101	2.3644	1.24147	6.37256e+08	8.77144e+07	5.06419e+07	13.7644	1.50673e+09	9.64949e+07	5.57113e+07	6.40427	0.00248345	1.34736	1.34733	3.49336	C26H52NO7P	Glycerophospholipids	PZRFVAHZNWPPAC-VBKSFVIKSA-N	CCCCCC\C=C/CCCCCCCCCC(=O)OC[C@@]([H])(O)COP([O-])(=O)OCC[N+](C)(C)C	---	53480465	HMDB0010385	Lipids and lipid-like molecules	Glycerophospholipids	UP
POS2030	Ascorbic acid	2.087	177.039	[M+H]+	177.039	True	4.45192e+08	5.32939e+08	5.06887e+08	8.13481e+07	7.07137e+07	8.56417e+07	9.48696e-05	6.24736	2.64325	7.92345e+07	7.68515e+06	4.43703e+06	9.69925	4.95006e+08	4.50639e+07	2.60176e+07	9.1037	0.00126012	1.35648	1.35649	4.02287	C6H8O6	Butenolides	CIWBSHSKHKDKBQ-JLAZNSOCSA-N	C([C@@H]([C@@H]1C(=C(C(=O)O1)O)O)O)O	C00072	54670067	HMDB0000044	Organoheterocyclic compounds	Dihydrofurans	UP
NEG2596	Tyrosine	3.961	180.066	[M-H]-	180.067	True	1.82053e+08	9.35002e+07	1.82859e+08	2.6124e+08	2.29046e+08	1.96049e+08	0.0965386	0.667913	-0.582269	2.28778e+08	3.25966e+07	1.88196e+07	14.2481	1.52804e+08	5.13601e+07	2.96528e+07	33.6118	0.18578	1.004	1.00402	1.0153	C9H11NO3	Amino acids and derivatives	OUYCCCASQSFEME-QMMMGPOBSA-N	C1=CC(=CC=C1C[C@@H](C(=O)O)N)O	C00082	6057;6942100	HMDB0000158	Organic acids and derivatives	Carboxylic acids and derivatives	NoSig
NEG4027	N-Acetyltyrosine	7.306	222.077	[M-H]-	222.077	True	1.11143e+07	9.35531e+06	1.04685e+07	9.50971e+06	9.1974e+06	9.18024e+06	0.124676	1.1094	0.149776	9.29578e+06	185466	107079	1.99516	1.03127e+07	889784	513717	8.62802	0.227055	0.951721	0.951523	0.904217	C11H13NO4	Carboxylic acids and derivatives	CAHKINHBCWCHCF-JTQLQIEISA-N	CC(=O)NC(CC1=CC=C(O)C=C1)C(O)=O	---	89216	HMDB0000866	Organic acids and derivatives	Carboxylic acids and derivatives	NoSig
POS721	Indane	11.799	119.086	[M+H]+	119.086	True	1.00888e+07	2.08306e+07	3.74083e+07	8.79805e+07	9.69166e+07	8.35674e+07	0.00166834	0.254513	-1.97419	8.94881e+07	6.8011e+06	3.92662e+06	7.6	2.27759e+07	1.37632e+07	7.94621e+06	60.429	0.00769788	1.32164	1.32152	2.77772	C9H10	Indanes	PQNFLJBBNBOBRQ-UHFFFAOYSA-N	C1CC2=CC=CC=C2C1	---	10326	HMDB0059837	Benzenoids	Indanes	DOWN
POS49	1,3,5-Hexatriene	6.519	81.0704	[M+H]+	81.0699	True	9.76776e+07	7.40561e+07	7.79982e+07	1.52841e+08	3.42706e+08	2.66015e+08	0.0374019	0.327921	-1.60858	2.53854e+08	9.5515e+07	5.51456e+07	37.626	8.3244e+07	1.26543e+07	7.30598e+06	15.2015	0.0862362	1.1456	1.14537	1.42711	C6H8	Unsaturated hydrocarbons	AFVDZBIIBXWASR-UHFFFAOYSA-N	C=CC=CC=C	---	16695	HMDB0251502	Hydrocarbons	Unsaturated hydrocarbons	DOWN
POS3691	Pivaloylcarnitine	7.433	246.17	[M+H]+	246.171	True	8.75818e+09	9.26367e+09	9.02972e+09	2.08794e+09	1.27484e+09	1.36764e+09	1.47869e-05	5.71864	2.51567	1.57681e+09	4.45077e+08	2.56965e+08	28.2265	9.01719e+09	2.52978e+08	1.46057e+08	2.8055	0.000463323	1.36309	1.36309	4.83012	C12H23NO4	Fatty Acyls	YICAQFPUDACYGQ-UHFFFAOYSA-N	CC(C)(C)C(=O)OC(CC([O-])=O)C[N+](C)(C)C	---	126894	HMDB0041993	Lipids and lipid-like molecules	Fatty Acyls	UP
POS1658	delta-Valerobetaine	1.458	160.133	[M+H]+	160.133	True	2.31563e+09	2.46717e+09	2.69287e+09	1.77904e+09	1.85459e+09	1.67364e+09	0.00400757	1.40857	0.494231	1.76909e+09	9.08839e+07	5.24718e+07	5.13732	2.49189e+09	1.89833e+08	1.096e+08	7.61803	0.0149763	1.29594	1.29608	2.39712	C8H17NO2	Straight chain fatty acids	CDLVFVFTRQPQFU-UHFFFAOYSA-N	C[N+](C)(C)CCCCC(=O)[O-]	---	14274897	HMDB0240732	Lipids and lipid-like molecules	Fatty Acyls	UP
NEG2442	Ascorbic acid	1.013	175.024	[M-H]-	175.025	True	2.64089e+09	3.37483e+09	3.44923e+09	3.16049e+08	5.96322e+08	5.88115e+08	0.000634011	6.30792	2.65716	5.00162e+08	1.595e+08	9.20871e+07	31.8896	3.15498e+09	4.4677e+08	2.57943e+08	14.1608	0.00387381	1.33912	1.33917	3.1979	C6H8O6	Butenolides	CIWBSHSKHKDKBQ-JLAZNSOCSA-N	O=C1OC(C(O)=C1O)C(O)CO	C00072	54670067	HMDB0000044	Organoheterocyclic compounds	Dihydrofurans	UP
POS13098	LPC(20:3)	12.52	546.353	[M+H]+	546.356	True	9.07781e+07	9.79618e+07	6.79367e+07	5.09108e+07	4.58234e+07	5.27086e+07	0.0182984	1.71756	0.780359	4.98143e+07	3.57118e+06	2.06182e+06	7.16899	8.55589e+07	1.56782e+07	9.05182e+06	18.3245	0.0493613	1.21349	1.21344	1.73759	C28H52NO7P	Glycerophospholipids	BBNHCUBQEQJHIG-FZZJNMCHSA-N	CCCCC\C=C/C\C=C/C\C=C/CCCCCCC(=O)OC[C@@H](O)COP([O-])(=O)OCC[N+](C)(C)C	---	52924055	HMDB0010394	Lipids and lipid-like molecules	Glycerophospholipids	UP
POS13914	LPC(22:5)	12.382	570.355	[2M+H]+	570.356	True	7.97917e+07	7.75911e+07	6.51745e+07	6.92994e+07	4.59275e+07	8.04574e+07	0.466591	1.13733	0.185649	6.52281e+07	1.76213e+07	1.01737e+07	27.0149	7.41857e+07	7.88117e+06	4.55019e+06	10.6236	0.612431	0.510609	0.509882	0.331064	C30H52NO7P	Glycerophospholipids	YBUXFQUGNPBZPS-YNBHEIDWSA-N	CCCCC\C=C/C\C=C/C\C=C/C\C=C/C\C=C/CCC(=O)OC[C@](O)([H])COP([O-])(=O)OCC[N+](C)(C)C	---	53480473	HMDB0010402	Lipids and lipid-like molecules	Glycerophospholipids	NoSig
NEG11940	LPE(P-18:1)	13.528	462.299	[M-H]-	462.298	True	9.53575e+07	1.00135e+08	9.40773e+07	5.93356e+07	5.26791e+07	5.30785e+07	0.000126985	1.75398	0.810631	5.50311e+07	3.73317e+06	2.15535e+06	6.78375	9.65233e+07	3.19274e+06	1.84333e+06	3.30774	0.00151366	1.35478	1.35478	3.89625	C23H46NO6P	Glycerophospholipids	URGVIWXYPWWBQO-UWEYSURVSA-N	CCCCCCCC\C=C/CCCCCC\C=C/OC[C@@H](O)COP(O)(=O)OCCN	---	154573335;154573336	HMDB0240599	Lipids and lipid-like molecules	Glycerophospholipids	UP
POS8625	3-Hydroxyhexadecadienoylcarnitine	10.444	412.306	[M+CH3OH+H]+	412.306	True	2.80463e+07	3.24256e+07	3.37467e+07	2.16444e+07	2.28004e+07	2.25392e+07	0.00667838	1.40658	0.492195	2.2328e+07	606280	350036	2.71534	3.14062e+07	2.98378e+06	1.72269e+06	9.50062	0.0220567	1.27502	1.2751	2.17533	C23H41NO5	Fatty Acyls	CPHHQDCIGLXPCO-IMMUWJHFSA-N	CCC\C=C/C\C=C/CCCCC[C@@H](O)CC(=O)O[C@H](CC([O-])=O)C[N+](C)(C)C	---	156908017	HMDB0013335	Lipids and lipid-like molecules	Fatty Acyls	UP
NEG13140	1-Oleoylglycerophosphoserine	11.897	522.283	[M-H]-	522.283	True	3.32875e+06	664346	5.05067e+07	5.20417e+06	1.74994e+06	9.75143e+07	0.661564	0.521687	-0.938744	3.48228e+07	5.43199e+07	3.13616e+07	155.989	1.81666e+07	2.8039e+07	1.61883e+07	154.344	0.77269	0.313417	0.314035	0.179428	C24H46NO9P	Glycerophospholipids	JZWNYZVVZXZRRH-UHFFFAOYSA-N	CCCCCCCCC=CCCCCCCCC(=O)OCC(O)COP(O)(=O)OCC(N)C(O)=O	---	85036846	HMDB0061694	Lipids and lipid-like molecules	Glycerophospholipids	NoSig
POS12189	LPC(18:3)	11.846	518.324	[2M+H]+	518.325	True	5.79159e+07	5.55047e+07	1.05057e+08	3.68604e+07	4.63272e+07	3.62967e+07	0.11542	1.82851	0.870668	3.98281e+07	5.63543e+06	3.25362e+06	14.1494	7.2826e+07	2.79393e+07	1.61308e+07	38.3644	0.213057	0.968071	0.968156	0.937718	C26H48NO7P	Lysophosphatidylcholines	MRTUWVDDQVMUCR-ACHCNROVSA-N	CCCCC\C=C/C\C=C/C\C=C/CCCCC(=O)OC[C@](O)([H])COP([O-])(=O)OCC[N+](C)(C)C	---	52924045	HMDB0010387	Lipids and lipid-like molecules	Glycerophospholipids	NoSig
POS4652	Coronaric acid	12.494	279.231	[M+H-H2O]+	279.231	True	4.39843e+08	5.34639e+08	3.91057e+08	4.19705e+08	4.81598e+08	5.18342e+08	0.74166	0.961888	-0.0560598	4.73215e+08	4.985e+07	2.87809e+07	10.5343	4.5518e+08	7.30097e+07	4.21522e+07	16.0398	0.837624	0.237945	0.2379	0.129795	C18H32O3	Medium-chain fatty acids	FBUKMFOXMZRGRB-YFHOEESVSA-N	CCCCC/C=C\CC1C(O1)CCCCCCCC(=O)O	C14825	6246154	HMDB0004701	Lipids and lipid-like molecules	Fatty Acyls	NoSig
POS1478	Xanthine	4.272	153.041	[M+H]+	153.041	True	8.31206e+09	1.49807e+10	9.94778e+09	1.41982e+10	1.10792e+10	6.02123e+09	0.845524	1.06205	0.0868484	1.04329e+10	4.1266e+09	2.3825e+09	39.5539	1.10802e+10	3.47557e+09	2.00662e+09	31.3674	0.908734	0.140828	0.141321	0.0728738	C5H4N4O2	Xanthines	LRFVTYWOQMYALW-JKKKRHIMNA-N	O=C1NC2=C(NC=N2)C(=O)N1	C00385	1188	HMDB0000292	Organoheterocyclic compounds	Imidazopyrimidines	NoSig
POS6621	Corticosterone	10.567	347.222	[M+H]+	347.222	True	5.77656e+07	6.03221e+07	5.59379e+07	3.59918e+07	3.76615e+07	4.06808e+07	0.000442368	1.52208	0.606043	3.81114e+07	2.37665e+06	1.37216e+06	6.23605	5.80085e+07	2.20215e+06	1.27141e+06	3.79625	0.00307202	1.34387	1.34383	3.35422	C21H30O4	21-hydroxysteroids	OMFXVFTZEKFJBZ-HJTSIMOOSA-N	CC12CCC(=O)C=C1CCC3C2C(CC4(C3CCC4C(=O)CO)C)O	C02140	5753	HMDB0001547	Lipids and lipid-like molecules	Steroids and steroid derivatives	UP
POS4193	6,10,14-Trimethyl-5,9,13-pentadecatrien-2-one	13.309	263.237	[M+H]+	263.237	True	4.16526e+06	9.07331e+06	4.54775e+06	3.04112e+06	4.21354e+06	1.05209e+08	0.404566	0.158152	-2.66062	3.74878e+07	5.8651e+07	3.38622e+07	156.454	5.92877e+06	2.72995e+06	1.57614e+06	46.0459	0.552997	0.576449	0.577047	0.393011	C18H30O	Prenol lipids	LTUMRKDLVGQMJU-HSVQFRAPSA-N	CC(C)=CCC\C(C)=C/CC\C(C)=C\CCC(C)=O	---	1711944	HMDB0034495	Lipids and lipid-like molecules	Prenol lipids	NoSig
NEG9215	GMP	3.012	362.051	[M-H]-	362.051	True	1.26086e+08	1.44791e+08	1.47686e+08	2.16647e+06	1.01687e+07	7.0324e+06	4.9298e-05	21.6115	4.43373	6.45585e+06	4.03214e+06	2.32796e+06	62.4571	1.39521e+08	1.17248e+07	6.7693e+06	8.4036	0.000825235	1.3595	1.35954	4.30717	C10H14N5O8P	Purine nucleotide sugars	RQFCJASXJCIDSX-UHFFFAOYSA-N	NC(N3)=Nc(c2C(=O)3)n(cn2)C(O1)C(O)C(O)C(COP(O)(O)=O)1	C00144	---	HMDB0001397	Nucleosides, nucleotides, and analogues	Purine nucleotides	UP
NEG4239	N-Decanoylglycine	9.722	228.16	[M-H]-	228.16	True	1.73395e+07	1.80161e+07	1.654e+07	3.33806e+07	3.34637e+07	3.99217e+07	0.00115985	0.486068	-1.04077	3.55887e+07	3.75274e+06	2.16664e+06	10.5447	1.72985e+07	738938	426626	4.27168	0.00603124	1.32903	1.32918	2.9356	C12H23NO3	Carboxylic acids and derivatives	WRRYZYASRAUROW-UHFFFAOYSA-N	CCCCCCCCCC(=O)NCC(O)=O	---	1712391	HMDB0013267	Organic acids and derivatives	Carboxylic acids and derivatives	DOWN
POS13839	LPC(22:6)	12.208	568.339	[M+H]+	568.34	True	6.86068e+08	6.23554e+08	7.05131e+08	5.42761e+08	5.14312e+08	4.81004e+08	0.00641449	1.30992	0.389475	5.12692e+08	3.091e+07	1.78459e+07	6.02895	6.71584e+08	4.26736e+07	2.46376e+07	6.35417	0.0214754	1.27695	1.27696	2.19284	C30H50NO7P	Glycerophospholipids	LSOWKZULVQWMLY-APPDJCNMSA-N	[H][C@@](O)(COC(=O)CC\C=C/C\C=C/C\C=C/C\C=C/C\C=C/C\C=C/CC)COP([O-])(=O)OCC[N+](C)(C)C	---	10415542	HMDB0010404	Lipids and lipid-like molecules	Glycerophospholipids	UP
POS13151	LPC(20:2)	13.492	548.372	[M+CH3OH+H]+	548.372	True	2.46812e+07	2.18761e+07	2.71955e+07	7.61739e+06	1.1711e+07	8.66301e+06	0.00148935	2.63484	1.39771	9.33048e+06	2.12688e+06	1.22795e+06	22.795	2.45843e+07	2.66102e+06	1.53634e+06	10.8241	0.0071525	1.32399	1.32407	2.827	C28H54NO7P	Glycerophospholipids	YYQVCMMXPIJVHY-ZOIJLGJPSA-N	CCCCC\C=C/C\C=C/CCCCCCCCCC(=O)OC[C@](O)([H])COP([O-])(=O)OCC[N+](C)(C)C	---	52924053	HMDB0010392	Lipids and lipid-like molecules	Glycerophospholipids	UP
NEG7734	3'-CMP	2.314	322.044	[M-H]-	322.045	True	1.03424e+09	8.65751e+08	1.07131e+09	1.192e+09	1.34499e+09	1.4586e+09	0.0267823	0.743646	-0.427311	1.33186e+09	1.33784e+08	7.72404e+07	10.0449	9.90436e+08	1.09558e+08	6.32536e+07	11.0616	0.0666559	1.18019	1.18036	1.57215	C9H14N3O8P	Monosaccharides	UOOOPKANIPLQPU-XVFCMESISA-N	OC[C@H]1O[C@H]([C@H](O)[C@@H]1OP(O)(O)=O)N1C=CC(=N)N=C1O	C05822	66535	HMDB0240312	Organic oxygen compounds	Organooxygen compounds	DOWN
NEG553	Glycerate	1.002	105.018	[M-H2O-H]-	105.019	True	9.94031e+07	1.11291e+08	1.00693e+08	2.19035e+08	3.24238e+08	3.42298e+08	0.00772687	0.351622	-1.5079	2.9519e+08	6.6568e+07	3.8433e+07	22.5509	1.03796e+08	6.5229e+06	3.766e+06	6.28438	0.024848	1.26804	1.26803	2.112	C3H6O4	Organooxygen compounds	RBNPOMFGQQGHHO-QKGSACKDNA-N	OC[C@H](O)C(O)=O	C00258	752	HMDB0000139	Organic oxygen compounds	Organooxygen compounds	DOWN
NEG8655	3'-AMP	4.595	346.056	[M-H]-	346.056	True	2.80457e+08	4.05114e+08	3.79998e+08	2.74492e+08	3.2712e+08	6.51707e+08	0.640142	0.850198	-0.23413	4.17773e+08	2.04294e+08	1.17949e+08	48.9008	3.5519e+08	6.59275e+07	3.80633e+07	18.5612	0.75737	0.334244	0.334728	0.193723	C10H14N5O7P	Ribonucleoside 3'-phosphates	LNQVTSROQXJCDD-KQYNXXCUSA-N	OC[C@@H](O1)[C@@H](OP(O)(O)=O)[C@@H](O)[C@@H]1n(c3)c(n2)c(n3)c(N)nc2	C01367	41211	HMDB0003540	Nucleosides, nucleotides, and analogues	Ribonucleoside 3'-phosphates	NoSig
POS2705	3-Indolehydracrylic acid	8.922	206.081	[M+CH3OH+H]+	206.082	True	4.07725e+07	4.77597e+07	4.77489e+07	2.5562e+07	2.30179e+07	2.39366e+07	0.000961285	1.87932	0.910207	2.41721e+07	1.28831e+06	743805	5.32972	4.54271e+07	4.03093e+06	2.32726e+06	8.87342	0.0053395	1.3326	1.33262	3.01715	C11H11NO3	Indoles and derivatives	HWRVAGPWLQXABS-UHFFFAOYSA-N	OC(CC(O)=O)C1=CNC2=C1C=CC=C2	---	69733299	HMDB0059765	Organoheterocyclic compounds	Indoles and derivatives	UP
POS10765	Docosa-4,7,10,13,16-pentaenoyl carnitine	11.465	474.356	[M+H]+	474.358	True	3.88651e+07	4.5256e+07	3.47547e+07	1.01788e+07	3.90365e+06	7.31037e+06	0.000793342	5.55682	2.47426	7.13093e+06	3.1414e+06	1.81369e+06	44.0532	3.96253e+07	5.29181e+06	3.05523e+06	13.3546	0.00455782	1.33584	1.33581	3.10054	C29H47NO4	Fatty Acyls	KRXOUZZWQXTUIB-IDERWEGCSA-N	CCCCC\C=C\C\C=C\C\C=C\C\C=C\C\C=C\CCC(=O)OC(CC([O-])=O)C[N+](C)(C)C	---	53477825	HMDB0006321	Lipids and lipid-like molecules	Fatty Acyls	UP
POS7841	3-Hydroxy-cis-5-tetradecenoylcarnitine	10.272	386.29	[M+H-H2O]+	386.291	True	3.33286e+07	3.71962e+07	3.90638e+07	3.17567e+07	3.28056e+07	3.16065e+07	0.0609995	1.13954	0.188457	3.20563e+07	653294	377180	2.03796	3.65295e+07	2.92511e+06	1.68882e+06	8.00753	0.127639	1.08129	1.0815	1.21467	C21H39NO5	Fatty Acyls	CJMUXNONVZSQIX-ZDOLJLSUSA-N	CCCCCCCC\C=C/CC(O)CC(=O)O[C@H](CC([O-])=O)C[N+](C)(C)C	---	156908008	HMDB0013330	Lipids and lipid-like molecules	Fatty Acyls	NoSig
POS1702	Carnitine	1.381	162.112	[M+H]+	162.112	True	8.41758e+09	7.89113e+09	8.5113e+09	5.8286e+09	5.63714e+09	5.47685e+09	0.000273154	1.46495	0.55085	5.64753e+09	1.76106e+08	1.01675e+08	3.11829	8.27334e+09	3.34301e+08	1.93009e+08	4.0407	0.00222485	1.3489	1.34889	3.56359	C7H15NO3	Carnitines	PHIQHXFUZVPYII-ZCFIWIBFSA-N	C[N+](C)(C)CC(CC(=O)[O-])O	C00318	85	HMDB0000062	Organic nitrogen compounds	Organonitrogen compounds	UP
POS4708	8,12-Octadecadienoic acid	12.155	281.248	[M+H-H2O]+	281.248	True	7.80154e+06	6.19791e+06	8.55505e+06	2.93982e+08	2.54839e+08	2.98356e+08	3.80481e-05	0.0266231	-5.23118	2.82392e+08	2.39619e+07	1.38344e+07	8.48533	7.51817e+06	1.20385e+06	695042	16.0125	0.000700057	1.36041	1.36049	4.41967	C18H32O2	Fatty Acyls	FVIFMUSFIUXENC-UHFFFAOYSA-N	CCCCCC=CCCC=CCCCCCCC(O)=O	---	122193	HMDB0247466	Lipids and lipid-like molecules	Fatty Acyls	DOWN
POS4097	3-Methylpentanoylcarnitine	8.311	260.186	[M+H]+	260.186	True	7.17257e+07	7.93635e+07	8.31368e+07	5.5516e+07	5.73813e+07	5.83882e+07	0.00373641	1.36746	0.451498	5.70952e+07	1.4573e+06	841372	2.5524	7.80753e+07	5.81357e+06	3.35647e+06	7.44611	0.0140923	1.29852	1.29856	2.42754	C13H25NO4	Fatty Acyls	HPKZJKWIYUYEKQ-UHFFFAOYSA-N	CCC(C)CC(=O)OC(CC([O-])=O)C[N+](C)(C)C	---	156961420	HMDB0241033	Lipids and lipid-like molecules	Fatty Acyls	UP
NEG3671	Indoxyl Sulfate	8.053	212.002	[M-H]-	212.002	True	3.84875e+08	3.85642e+08	3.81396e+08	3.29478e+08	3.20725e+08	3.72635e+08	0.0556462	1.12619	0.171455	3.40946e+08	2.77901e+07	1.60446e+07	8.15088	3.83971e+08	2.26235e+06	1.30617e+06	0.589198	0.118055	1.09525	1.0948	1.25456	C8H7NO4S	Arylsulfates	BXFFHSIDQOFMLE-UHFFFAOYSA-N	C1=CC=C2C(=C1)C(=CN2)OS(=O)(=O)O	C08481	10258	HMDB0000682	Organic acids and derivatives	Organic sulfuric acids and derivatives	NoSig
NEG2955	Citric acid	2.071	191.019	[M-H]-	191.02	True	3.59729e+09	4.75492e+09	4.92389e+09	9.60126e+08	2.15093e+09	1.86034e+09	0.00730866	2.6705	1.41711	1.65713e+09	6.20866e+08	3.58457e+08	37.4663	4.42537e+09	7.22097e+08	4.16903e+08	16.3172	0.0237531	1.27066	1.27079	2.13616	C6H8O7	Tricarboxylic acids and derivatives	KRKNYBCHXYNGOX-UHFFFAOYSA-N	C(C(=O)O)C(CC(=O)O)(C(=O)O)O	C00158	311	HMDB0000094	Organic acids and derivatives	Carboxylic acids and derivatives	UP
NEG1196	Iminodiacetic acid	0.86	132.029	[M-H]-	132.03	True	5.11466e+08	5.99437e+08	5.85534e+08	7.7079e+08	6.77656e+08	8.18312e+08	0.0184715	0.748398	-0.418123	7.55586e+08	7.15497e+07	4.13093e+07	9.46944	5.65479e+08	4.72904e+07	2.73031e+07	8.36289	0.0497184	1.21243	1.2127	1.7335	C4H7NO4	Carboxylic acids and derivatives	NBZBKCUXIYYUSX-UHFFFAOYSA-N	OC(=O)CNCC(O)=O	C19911	8897	HMDB0011753	Organic acids and derivatives	Carboxylic acids and derivatives	DOWN
NEG552	Glycerate	1.24	105.018	[M-H]-	105.019	True	1.38189e+08	4.87196e+07	1.1778e+08	1.27106e+08	2.22343e+08	1.4172e+08	0.196231	0.620333	-0.688885	1.63723e+08	5.12895e+07	2.9612e+07	31.327	1.01563e+08	4.68875e+07	2.70705e+07	46.166	0.322738	0.837682	0.837391	0.707232	C3H6O4	Organooxygen compounds	RBNPOMFGQQGHHO-QKGSACKDNA-N	OC[C@H](O)C(O)=O	C00258	752	HMDB0000139	Organic oxygen compounds	Organooxygen compounds	NoSig
POS4363	Histidylleucine	3.672	269.16	[M+H]+	269.161	True	6.80661e+07	9.18109e+07	7.00619e+07	1.64944e+07	2.00161e+07	1.46726e+07	0.00155008	4.49248	2.16751	1.7061e+07	2.71647e+06	1.56835e+06	15.9221	7.66463e+07	1.31708e+07	7.60415e+06	17.1838	0.00734184	1.32308	1.32319	2.80965	C12H20N4O3	Peptides	MMFKFJORZBJVNF-UWVGGRQHSA-N	CC(C)CC(NC(=O)C(N)CC1=CN=CN1)C(O)=O	C05010	440549	HMDB0028889	Organic acids and derivatives	Carboxylic acids and derivatives	UP
POS1995	1,2,3,4,Tetrahydro-1,5,7-trimethylnapthalene	10.963	175.148	[M+H]+	175.149	True	5.83134e+07	5.74378e+07	5.95642e+07	3.52036e+07	3.65978e+07	3.19426e+07	9.40381e-05	1.68988	0.756925	3.45813e+07	2.38915e+06	1.37938e+06	6.90878	5.84385e+07	1.06868e+06	617005	1.82873	0.00126012	1.35646	1.35654	4.0267	C13H18	Tetralins	VJFBUCVRMBYHAH-UHFFFAOYSA-N	CC1CCCC2=C(C)C=C(C)C=C12	---	529436	HMDB0059696	Benzenoids	Tetralins	UP
POS13041	LPC(20:4)	12.267	544.339	[M+H]+	544.34	True	1.01226e+09	1.16308e+09	1.06617e+09	7.66709e+08	7.67105e+08	7.42551e+08	0.00200288	1.42398	0.509932	7.58789e+08	1.40633e+07	8.11948e+06	1.8534	1.0805e+09	7.64281e+07	4.41258e+07	7.07339	0.00887303	1.317	1.31711	2.69835	C28H50NO7P	Glycerophospholipids	GOMVPVRDBLLHQC-VEJNOCSESA-N	CC\C=C/C\C=C/C\C=C/C\C=C/CCCCCCC(=O)OC[C@](O)([H])COP([O-])(=O)OCC[N+](C)(C)C	---	53480469	HMDB0010396	Lipids and lipid-like molecules	Glycerophospholipids	UP
POS9011	(2E,4E)-Octadeca-2,4-dienoylcarnitine	11.386	424.341	[M+H]+	424.343	True	4.06885e+08	3.86479e+08	4.32742e+08	2.98253e+08	2.89157e+08	2.25744e+08	0.00649198	1.50784	0.592482	2.71052e+08	3.95001e+07	2.28054e+07	14.5729	4.08702e+08	2.31851e+07	1.33859e+07	5.67287	0.0215656	1.27625	1.27641	2.18762	C25H45NO4	Fatty Acyls	FUDZPSAPZLYOMT-UHFFFAOYSA-N	CCCCCCCCCCCCCC=CC=CC(=O)OC(CC([O-])=O)C[N+](C)(C)C	---	87076356	HMDB0241541	Lipids and lipid-like molecules	Fatty Acyls	UP
POS5314	Dihydrosphingosine	11.194	302.305	[M+H]+	302.305	True	2.79068e+08	3.32808e+08	3.57108e+08	8.23558e+07	9.14295e+07	9.27772e+07	0.000550347	3.63511	1.862	8.88542e+07	5.66794e+06	3.27238e+06	6.37892	3.22995e+08	3.99352e+07	2.30566e+07	12.364	0.0035396	1.34107	1.34111	3.25936	C18H39NO2	Alkanolamines	OTKJDMGTUTTYMP-UHFFFAOYSA-N	CCCCCCCCCCCCCCC[C@H]([C@H](CO)N)O	C00836	91486	HMDB0000269	Organic nitrogen compounds	Organonitrogen compounds	UP
POS10035	(13Z)-Eicoseneoylcarnitine	11.97	454.389	[M+H]+	454.39	True	9.73108e+07	1.09005e+08	1.18786e+08	5.06174e+07	5.15677e+07	47543612	0.000761906	2.17127	1.11854	4.99096e+07	2.10334e+06	1.21436e+06	4.2143	1.08367e+08	1.07516e+07	6.20743e+06	9.92145	0.00442925	1.33639	1.33645	3.1181	C27H51NO4	Fatty Acyls	NUMUVTLHJBZROV-UHFFFAOYSA-N	CCCCCCC=CCCCCCCCCCCCC(=O)OC(CC([O-])=O)C[N+](C)(C)C	---	---	HMDB0241571	Lipids and lipid-like molecules	Fatty Acyls	UP
POS2294	Trimethyllysine	1.263	189.16	[M+H]+	189.16	True	2.1419e+08	1.98057e+08	2.03491e+08	2.69583e+08	2.64041e+08	2.71678e+08	0.00027492	0.764605	-0.387213	2.68434e+08	3.94568e+06	2.27804e+06	1.46989	2.05246e+08	8.20859e+06	4.73923e+06	3.99939	0.00222485	1.34873	1.34883	3.56079	C9H20N2O2	Amino acids and derivatives	MXNRLFUSFKVQSK-QMMMGPOBSA-N	O=C([O-])C(N)CCCC[N+](C)(C)C	C03793	440120	HMDB0001325	Organic acids and derivatives	Carboxylic acids and derivatives	DOWN
POS2009	Citrulline	1.38	176.103	[M+H]+	176.103	True	3.07009e+08	3.37896e+08	3.50198e+08	2.0983e+08	2.20457e+08	2.22061e+08	0.0010405	1.52542	0.609205	2.17449e+08	6.64704e+06	3.83767e+06	3.05682	3.31701e+08	2.2251e+07	1.28466e+07	6.70813	0.0055767	1.33117	1.33121	2.98276	C6H13N3O3	Amino acids and derivatives	RHGKLRLOHDJJDR-BYPYZUCNSA-N	N[C@@H](CCCNC(N)=O)C(O)=O	C00327	9750;6992098	HMDB0000904	Organic acids and derivatives	Carboxylic acids and derivatives	UP
NEG7174	Glutathione (Reduced)	6.68	306.076	[M-H]-	306.077	True	1.30582e+08	2.01444e+08	2.27935e+08	5.51865e+07	9.03096e+07	7.68749e+07	0.0217234	2.51814	1.33236	7.41237e+07	1.77224e+07	1.02321e+07	23.9093	1.86654e+08	5.03339e+07	2.90603e+07	26.9665	0.0564707	1.19921	1.19935	1.66307	C10H17N3O6S	Peptides	RWSXRVCMGQZWBV-UHFFFAOYSA-N	O=C(O)CN=C(O)C(N=C(O)CCC(N)C(=O)O)CS	C00051	124886	HMDB0000125	Organic acids and derivatives	Carboxylic acids and derivatives	UP
POS4698	Aspartylphenylalanin	7.189	281.113	[M+H]+	281.113	True	5.87843e+07	6.21145e+07	6.05037e+07	1.89525e+07	1.94177e+07	1.86612e+07	1.91601e-06	3.18075	1.66937	1.90105e+07	381561	220294	2.00711	6.04675e+07	1.66541e+06	961524	2.75422	0.000195872	1.36581	1.36584	5.7176	C13H16N2O5	Peptides	YZQCXOFQZKCETR-UHFFFAOYSA-N	O=C(O)CC(N)C(O)=NC(C(=O)O)CC=1C=CC=CC1	---	93078	HMDB0000706	Organic acids and derivatives	Carboxylic acids and derivatives	UP
POS11402	LPC(16:1)	12.049	494.325	[M+H-H2O]+	494.325	True	1.59227e+09	1.71592e+09	1.57766e+09	1.01938e+09	1.0762e+09	1.00826e+09	0.000258165	1.57413	0.654558	1.03461e+09	3.6443e+07	2.10404e+07	3.52239	1.62862e+09	7.59625e+07	4.3857e+07	4.66424	0.00219082	1.34931	1.3494	3.5881	C24H48NO7P	Glycerophospholipids	LFUDDCMNKWEORN-ZXEGGCGDSA-N	CCCCCC\C=C/CCCCCCCC(=O)OC[C@@H](O)COP([O-])(=O)OCC[N+](C)(C)C	---	24779461	HMDB0010383	Lipids and lipid-like molecules	Glycerophospholipids	UP
POS5373	Benzododecinium	11.167	304.299	[M]+	304.299	True	3.54682e+08	3.89717e+08	346813443	2.0422e+08	2.1741e+08	2.00588e+08	0.000380853	1.75375	0.810443	2.07406e+08	8.85204e+06	5.11073e+06	4.26798	3.63738e+08	2.28405e+07	1.3187e+07	6.27939	0.00277026	1.34544	1.34554	3.41924	C21H38N+	Phenylmethylamines	CYDRXTMLKJDRQH-UHFFFAOYSA-N	CCCCCCCCCCCC[N+](C)(C)CC1=CC=CC=C1	---	8754	---	Benzenoids	Benzene and substituted derivatives	UP
POS968	Dibutylamine	7.475	130.159	[M+H]+	130.159	True	5.93542e+09	6.30001e+09	6.09411e+09	7.01194e+09	7.70495e+09	7.95952e+09	0.00867852	0.808309	-0.307022	7.5588e+09	4.90408e+08	2.83137e+08	6.4879	6.10984e+09	1.82804e+08	1.05542e+08	2.99196	0.0271927	1.26201	1.26201	2.06155	C8H19N	Organonitrogen compounds	JQVDAXLFBXTEQA-UHFFFAOYSA-N	CCCCNCCCC	---	8148	HMDB0251174	Organic nitrogen compounds	Organonitrogen compounds	DOWN
POS4157	3-Hydroxyisovalerylcarnitine	6.781	262.165	[M+NH4]+	262.165	True	5.44147e+08	5.43001e+08	4.7808e+08	2.64284e+08	3.22816e+08	3.19088e+08	0.00160519	1.72727	0.788492	302062483	3.277e+07	1.89198e+07	10.8488	5.21743e+08	3.78171e+07	2.18337e+07	7.24822	0.00749127	1.32237	1.3224	2.79447	C12H23NO5	Fatty Acyls	IGLHHSKNBDXCEY-SECBINFHSA-N	CC(C)(O)CC(=O)O[C@H](CC([O-])=O)C[N+](C)(C)C	---	131668011	HMDB0061189	Lipids and lipid-like molecules	Fatty Acyls	UP
NEG2918	N-Acetylmethionine	7.44	190.054	[M-H]-	190.054	True	2.52373e+08	2.54996e+08	2.66103e+08	1.58982e+08	1.68734e+08	1.69452e+08	6.90659e-05	1.55576	0.637617	1.65723e+08	5.84817e+06	3.37644e+06	3.52889	2.57824e+08	7.28873e+06	4.20815e+06	2.82702	0.00102925	1.35809	1.35809	4.16074	C7H13NO3S	Amino acids and derivatives	XUYPXLNMDZIRQH-LURJTMIESA-N	O=C(NC(C(=O)O)CCSC)C	C02712	---	HMDB0011745	Organic acids and derivatives	Carboxylic acids and derivatives	UP
NEG13115	LPS(18:2)	12.238	520.268	[M-H]-	520.268	True	624048	1.89596e+07	2.70269e+07	317934	3.00627e+07	3.16697e+07	0.709086	0.751174	-0.412781	2.06834e+07	1.76553e+07	1.01933e+07	85.3598	1.55369e+07	1.35301e+07	7.81162e+06	87.0841	0.8068	0.268806	0.26865	0.149301	C24H44NO9P	Glycerophospholipids	HLISFLFEEBTXRV-FRZHUQNDSA-N	CCCCC\C=C/C\C=C/CCCCCCCC(=O)OC[C@@H](O)COP(O)(=O)OC[C@H](N)C(O)=O	---	52926279	HMDB0240604	Lipids and lipid-like molecules	Glycerophospholipids	NoSig
POS10390	(5Z,8S,9E,11Z,14Z)-8-Hydroxyicosa-5,9,11,14-tetraenoylcarnitine	10.991	464.338	[M+H]+	464.338	True	3.73221e+07	3.72543e+07	3.74325e+07	1.24557e+07	1.22106e+07	1.08502e+07	8.99414e-07	3.15371	1.65705	1.18388e+07	864875	499336	7.3054	3.73363e+07	89944.9	51929.7	0.240905	0.000131348	1.3663	1.36632	6.04604	C27H45NO5	Fatty Acyls	WGEGVKLLAFSTDS-UHFFFAOYSA-N	CCCCCC=CCC=CC=CC(O)CC=CCCCC(=O)OC(CC([O-])=O)C[N+](C)(C)C	---	---	HMDB0241590	Lipids and lipid-like molecules	Fatty Acyls	UP
POS2661	Acetylcarnitine	2.51	204.123	[M+H]+	204.123	True	1.16399e+10	1.19587e+10	8.9646e+09	9.60118e+09	8.9776e+09	8.48962e+09	0.141682	1.20299	0.266629	9.0228e+09	5.57157e+08	3.21674e+08	6.17499	10854368277	1.64434e+09	9.49358e+08	15.1491	0.252753	0.922197	0.922299	0.848684	C9H17NO4	Acyl carnitines	RDHQFKQIGNGIED-MRVPVSSYSA-N	O=C(OC(CC(=O)[O-])C[N+](C)(C)C)C	C02571	7045767	HMDB0000201	Lipids and lipid-like molecules	Fatty Acyls	NoSig
NEG3900	Pantothenic acid	6.887	218.103	[M-H]-	218.103	True	1.43126e+09	1.33074e+09	1.2956e+09	8.32808e+08	9.64274e+08	1.0168e+09	0.0036945	1.44199	0.528062	9.37962e+08	9.47781e+07	5.47202e+07	10.1047	1.35253e+09	7.04069e+07	4.06495e+07	5.20556	0.0140207	1.29901	1.29895	2.43244	C9H17NO5	Amino acids and derivatives	GHOKWGTUZJEAQD-ZETCQYMHSA-N	CC(C)(CO)C(O)C(O)=NCCC(=O)O	C00864	988	HMDB0000210	Organic acids and derivatives	Carboxylic acids and derivatives	UP
POS2181	Phosphocholine	1.292	184.073	[M]+	184.073	True	4.6598e+08	5.14753e+08	5.06565e+08	7.03802e+08	7.08975e+08	7.03254e+08	0.000159903	0.702871	-0.508667	7.05344e+08	3.1565e+06	1.82241e+06	0.447512	4.95766e+08	2.61185e+07	1.50795e+07	5.2683	0.00170581	1.35329	1.35324	3.79614	C5H15NO4P+	Cholines	YHHSONZFOIEMCP-UHFFFAOYSA-O	C[N+](C)(C)CCOP(=O)(O)O	C00588	---	HMDB0001565	Organic nitrogen compounds	Organonitrogen compounds	DOWN
NEG8690	IMP	2.927	347.04	[M-H]-	347.04	True	1.27077e+09	1.43124e+09	1.60242e+09	1.33955e+07	2.94862e+07	2.8688e+07	0.000124183	60.1431	5.91033	2.38566e+07	9.06834e+06	5.23561e+06	38.0119	1.43481e+09	1.65851e+08	9.57539e+07	11.5591	0.00151366	1.35491	1.35492	3.90594	C10H13N4O8P	Purine ribonucleoside monophosphates	GRSZFWQUAKGDAV-KQYNXXCUSA-N	C1=NC2=C(C(=O)N1)N=CN2[C@H]3[C@@H]([C@@H]([C@H](O3)COP(=O)(O)O)O)O	C00130	---	HMDB0000175	Nucleosides, nucleotides, and analogues	Purine nucleotides	UP
POS3254	PyroGlu-Val	7.225	229.118	[M+H]+	229.118	True	5.05614e+07	5.10682e+07	4.80136e+07	5.72051e+07	6.33862e+07	6.215e+07	0.00640708	0.81888	-0.288276	6.09138e+07	3.27071e+06	1.88835e+06	5.36942	4.98811e+07	1.63702e+06	945131	3.28184	0.0214754	1.27711	1.27701	2.19334	C10H16N2O4	Peptides	DTSWLLBBGHRXQH-UUEFVBAFSA-N	O=C(NC(C(O)=O)C(C)C)[C@H]1NC(CC1)=O	---	103803266	---	Organic acids and derivatives	Carboxylic acids and derivatives	DOWN
POS12509	Melezitose	1.837	527.159	[M+Na]+	527.158	True	8.25667e+07	1.31914e+08	1.1427e+08	7.06738e+07	1.06557e+08	1.16143e+08	0.587102	1.12059	0.164255	9.77911e+07	2.39684e+07	1.38382e+07	24.5098	1.09583e+08	2.50051e+07	1.44367e+07	22.8183	0.718593	0.38656	0.386703	0.231287	C18H32O16	Oligosaccharides	QWIZNVHXZXRPDR-WSCXOGSTSA-N	OCC1OC(OC2C(O)C(OC2(OC3OC(CO)C(O)C(O)C3O)CO)CO)C(O)C(O)C1O	C08243	92817	HMDB0011730	Organic oxygen compounds	Organooxygen compounds	NoSig
POS10111	Arachidyl carnitine	12.172	456.405	[M+H]+	456.405	True	3.42144e+07	4.35328e+07	3.22983e+07	9.17518e+06	4.98245e+06	8.7923e+06	0.00145307	4.79502	2.26154	7.64998e+06	2.31807e+06	1.33834e+06	30.3016	3.66818e+07	6.00998e+06	3.46987e+06	16.3841	0.00704625	1.32462	1.3246	2.83771	C27H53NO4	Fatty Acyls	SVJLJQBGUITFLI-UHFFFAOYSA-N	CCCCCCCCCCCCCCCCCCCC(=O)OC(CC([O-])=O)C[N+](C)(C)C	---	53477833	HMDB0006460	Lipids and lipid-like molecules	Fatty Acyls	UP
NEG8658	2-hydroxy-dAMP	2.548	346.056	[M-H2O-H]-	346.055	True	1.03469e+08	2.26191e+08	2.4876e+08	4.22281e+07	4.08482e+07	4.12247e+07	0.0284848	4.65339	2.21828	4.14337e+07	713303	411826	1.72155	1.92807e+08	7.81872e+07	4.51414e+07	40.5521	0.0694779	1.17426	1.17436	1.54539	C10H14N5O7P	Purine nucleotides	GEQDRKVFKBSPSW-KVQBGUIXSA-N	[H][C@]1(O)C[C@@]([H])(O[C@]1([H])COP(O)(O)=O)N1C=NC2=C(N)N=C(O)N=C12	C19970	6323381	HMDB0059594	Nucleosides, nucleotides, and analogues	Purine nucleotides	UP
NEG2852	N-Lactoylvaline	7.607	188.092	[M-H]-	188.092	True	2.30169e+07	2.19305e+07	2.41568e+07	2.28597e+07	2.53913e+07	2.60086e+07	0.211997	0.930575	-0.103806	2.47532e+07	1.66861e+06	963370	6.74097	2.30347e+07	1.11326e+06	642739	4.83295	0.341769	0.814661	0.814758	0.67367	C8H15NO4	Carboxylic acids and derivatives	IJKKTQLUXOILBQ-ZBHICJROSA-N	CC(C)C(NC(=O)[C@H](C)O)C(O)=O	---	131770417	HMDB0062181	Organic acids and derivatives	Carboxylic acids and derivatives	NoSig
POS1325	3-Hydroxyadipic acid 3,6-lactone	6.863	145.049	[M+CH3OH+H]+	145.05	True	1.00223e+08	1.25086e+08	1.26309e+08	5.51229e+07	5.96479e+07	8.03562e+07	0.0105726	1.802	0.849596	6.50423e+07	1.34538e+07	7.76756e+06	20.6847	1.17206e+08	1.47203e+07	8.49878e+06	12.5594	0.0320445	1.25101	1.25092	1.97582	C6H8O4	Lactones	BWEICTHJUIJQPH-UHFFFAOYSA-N	[H]OC(=O)CC1([H])CCC(=O)O1	---	194109	HMDB0029171	Organoheterocyclic compounds	Lactones	UP
NEG6755	13-Hydroxyoctadeca-9,12-dienoic acid	12.489	295.228	[M-H]-	295.228	True	2.56912e+08	2.30435e+08	2.78255e+08	3.53445e+08	3.5403e+08	4.05135e+08	0.00628378	0.688113	-0.539282	3.7087e+08	2.96755e+07	1.71332e+07	8.00159	2.55201e+08	2.3956e+07	1.3831e+07	9.38713	0.0212709	1.27767	1.2779	2.20178	C18H32O3	Fatty Acyls	KJXHHTPQSFDEKB-UHFFFAOYSA-N	CCCCCC(O)=CCC=CCCCCCCCC(O)=O	---	125660	HMDB0244510	Lipids and lipid-like molecules	Fatty Acyls	DOWN
POS10545	LPC(14:0)	11.756	468.308	[M+H]+	468.308	True	5.37794e+08	5.49453e+08	5.37359e+08	3.04169e+08	3.39332e+08	3.57867e+08	0.000215096	1.62239	0.698118	3.33789e+08	2.72749e+07	1.57472e+07	8.17131	5.41535e+08	6.86047e+06	3.96089e+06	1.26686	0.00203758	1.35099	1.35098	3.66737	C22H46NO7P	Lysophosphatidylcholines	VXUOFDJKYGDUJI-OAQYLSRUSA-N	CCCCCCCCCCCCCC(=O)OC[C@H](COP(=O)([O-])OCC[N+](C)(C)C)O	---	460604	HMDB0010379	Lipids and lipid-like molecules	Glycerophospholipids	UP
POS7805	S-Adenosylhomocysteine	6.693	385.128	[M+H]+	385.129	True	1.57858e+08	1.58241e+08	1.75506e+08	7.85625e+07	8.72317e+07	8.93789e+07	0.000297721	1.92655	0.946022	8.50577e+07	5.72657e+06	3.30624e+06	6.73258	1.63868e+08	1.00803e+07	5.81987e+06	6.15147	0.00236244	1.34808	1.34807	3.52619	C14H20N6O5S	Gamma butyrolactones	ZJUKTBDSGOFHSH-UHFFFAOYSA-N	O=C(O)C(N)CCSCC1OC(N2C=NC=3C(=NC=NC32)N)C(O)C1O	C00021	439155	HMDB0000939	Organoheterocyclic compounds	Lactones	UP
POS9613	3-Hydroxy-11Z-octadecenoylcarnitine	11.212	442.352	[2M+H]+	442.353	True	1.32869e+08	1.43465e+08	1.33776e+08	9.66057e+07	1.1492e+08	9.12056e+07	0.010744	1.3547	0.437972	1.00911e+08	1.24297e+07	7.17628e+06	12.3175	1.36703e+08	5.87362e+06	3.39114e+06	4.29661	0.0322583	1.24961	1.24996	1.96884	C25H47NO5	Fatty Acyls	FMLYQPQCFBAOHS-XQRPBTPTSA-N	CCCCCC\C=C/CCCCCCC[C@@H](O)CC(=O)O[C@H](CC([O-])=O)C[N+](C)(C)C	---	156908021	HMDB0013339	Lipids and lipid-like molecules	Fatty Acyls	UP
NEG4119	Carnosine	0.858	225.099	[M-H]-	225.099	True	1.19177e+08	1.00078e+08	1.30815e+08	1.08754e+08	1.08693e+08	1.05956e+08	0.37956	1.08246	0.114311	1.07801e+08	1.59827e+06	922764	1.48261	1.1669e+08	1.55185e+07	8.95964e+06	13.2989	0.531297	0.605185	0.60508	0.420719	C9H14N4O3	Hybrid peptides	CQOVPNPJLQNMDC-ZETCQYMHSA-N	C1=C(NC=N1)CC(C(=O)O)NC(=O)CCN	C00386	439224	HMDB0000033	Organic acids and derivatives	Peptidomimetics	NoSig
NEG2116	Phenylalanine	6.845	164.07	[M-H]-	164.072	True	5.77347e+08	2.15811e+08	7.23805e+08	4.32895e+08	2.74324e+08	1.30051e+09	0.667034	0.755563	-0.404376	6.69242e+08	5.5241e+08	3.18934e+08	82.5427	5.05654e+08	2.61475e+08	1.50963e+08	51.7103	0.7763	0.308036	0.308777	0.175852	C9H11NO2	Amino acids and derivatives	COLNVLDHVKWLRT-UHFFFAOYSA-N	C1=CC=C(C=C1)CC(C(=O)O)N	C00079	---	HMDB0000159	Organic acids and derivatives	Carboxylic acids and derivatives	NoSig
NEG5377	Leucylglutamate	6.915	259.13	[M-H]-	259.129	True	5.65291e+07	4.77189e+07	4.81106e+07	1.87113e+07	2.07134e+07	2.25493e+07	0.000612059	2.45843	1.29774	2.0658e+07	1.9196e+06	1.10828e+06	9.29229	5.07862e+07	4.97738e+06	2.87369e+06	9.80066	0.00377745	1.33973	1.33967	3.21321	C11H20N2O5	Peptides	NFNVDJGXRFEYTK-UHFFFAOYSA-N	CC(C)CC(N)C(=O)NC(CCC(O)=O)C(O)=O	---	5259589;5259590	HMDB0028928	Organic acids and derivatives	Carboxylic acids and derivatives	UP
NEG3490	2-Acetamido-4-methylphenyl acetate	8.679	206.082	[M-H]-	206.082	True	2.27311e+07	2.11019e+07	2.18983e+07	2.01785e+07	2.0653e+07	2.32445e+07	0.630974	1.02583	0.0367965	2.13586e+07	1.65029e+06	952796	7.72657	2.19104e+07	814642	470334	3.71806	0.74932	0.344262	0.343634	0.199988	C11H13NO3	Phenol esters	GPJFMEZBKSINFK-UHFFFAOYSA-N	CC(=O)NC1=CC(C)=CC=C1OC(C)=O	---	734306	HMDB0061682	Benzenoids	Phenol esters	NoSig
POS859	4-Hydroxy-2H-pyran-3-carboxaldehyde	2.754	127.039	[M+H]+	127.04	True	3.99056e+08	3.93013e+08	4.55177e+08	2.16439e+08	3.0364e+08	5.07393e+08	0.454092	1.2139	0.279648	3.42491e+08	1.49317e+08	8.62083e+07	43.5974	4.15749e+08	3.42792e+07	1.97911e+07	8.24516	0.601193	0.523626	0.523172	0.342856	C6H6O3	Pyrans	ZNUNRMPPGAAKKR-UHFFFAOYSA-N	OC1=C(COC=C1)C=O	---	---	HMDB0031256	Organoheterocyclic compounds	Pyrans	NoSig
NEG8029	9,10,13-TriHOME	10.209	329.233	[M-H]-	329.233	True	9.58635e+07	9.83945e+07	8.36725e+07	1.78314e+08	1.87963e+08	1.88374e+08	8.00358e-05	0.501091	-0.996856	1.84884e+08	5.69311e+06	3.28692e+06	3.07929	9.26435e+07	7.8715e+06	4.54461e+06	8.49654	0.00115063	1.35739	1.35738	4.09672	C18H34O5	Fatty Acyls	NTVFQBIHLSPEGQ-SYMVGPSASA-N	CCCCC[C@H](O)\C=C\[C@@H](O)[C@@H](O)CCCCCCCC(O)=O	C14835	14968868	HMDB0004710	Lipids and lipid-like molecules	Fatty Acyls	DOWN
POS4913	4-Methylheptanoylcarnitine	9.283	288.217	[M+H]+	288.217	True	2.04207e+07	1.99666e+07	2.30478e+07	1.707e+07	1.63464e+07	1.53265e+07	0.0107223	1.30142	0.380091	1.62476e+07	875908	505706	5.391	2.1145e+07	1.66341e+06	960370	7.86666	0.0322583	1.25003	1.25009	1.96971	C15H29NO4	Fatty Acyls	LZPPUOVHBXZDDN-UHFFFAOYSA-N	CCCC(C)CCC(=O)OC(CC([O-])=O)C[N+](C)(C)C	---	156961438	HMDB0241042	Lipids and lipid-like molecules	Fatty Acyls	UP
POS5368	3-hydroxyoctanoyl carnitine	8.331	304.211	[M+CH3OH+H]+	304.212	True	1.89096e+07	1.9968e+07	2.02331e+07	1.3981e+07	1.55243e+07	1.5503e+07	0.00195663	1.31333	0.393228	1.50028e+07	884939	510920	5.8985	1.97036e+07	700227	404276	3.55381	0.00872631	1.31764	1.3177	2.70849	C15H29NO5	Fatty Acyls	LUBMSOHGUAAXAM-UHFFFAOYSA-N	CCCCCC(O)CC(=O)OC(CC([O-])=O)C[N+](C)(C)C	---	86583357	HMDB0061634	Lipids and lipid-like molecules	Fatty Acyls	UP
NEG6264	beta-D-Glucopyranosiduronic acid, 4-methylphenyl	8.317	283.082	[M-H]-	283.082	True	2.99061e+06	2.62217e+06	2.38897e+06	2.48406e+06	2.14349e+06	3.18584e+06	0.867586	1.02411	0.0343689	2.60446e+06	531507	306866	20.4076	2.66725e+06	303343	175135	11.3729	0.92735	0.121792	0.121023	0.0616877	C13H16O7	Glycosyl compounds	JPAUCQAJHLSMQW-XPORZQOISA-N	O=C(O)C1OC(OC2=CC=C(C=C2)C)C(O)C(O)C1O	---	154035	HMDB0011686	Organic oxygen compounds	Organooxygen compounds	NoSig
POS12405	LPC(18:0)	12.195	524.372	[M+H]+	524.371	True	2.37313e+07	1.09913e+10	1.11732e+10	5.3985e+07	2.4211e+08	3.93535e+09	0.199362	5.24366	2.39057	1.41048e+09	2.18862e+09	1.2636e+09	155.168	7.39609e+09	6.38529e+09	3.68655e+09	86.3334	0.326075	0.832847	0.83284	0.700358	C26H54NO7P	Lysophosphatidylcholines	IHNKQIMGVNPMTC-RUZDIDTESA-N	CCCCCCCCCCCCCCCCCC(=O)OC[C@H](COP(=O)([O-])OCC[N+](C)(C)C)O	---	497299	HMDB0010384	Lipids and lipid-like molecules	Glycerophospholipids	NoSig
POS8153	(3Z,9Z)-Hexadecadienoylcarnitine	10.966	396.309	[M+H]+	396.311	True	5.84192e+07	6.24991e+07	7.47306e+07	6.31393e+07	7.00786e+07	6.12589e+07	0.9476	1.00603	0.00866929	6.48256e+07	4.64537e+06	2.68201e+06	7.16595	6.52163e+07	8.48841e+06	4.90079e+06	13.0158	0.980075	0.0473506	0.0477862	0.0233747	C23H41NO4	Acyl carnitines	DIQVNBQNZYWXJS-UHFFFAOYSA-N	CCCCCCC=CCCCCC=CCC(=O)OC(CC([O-])=O)C[N+](C)(C)C	---	---	HMDB0241481	Lipids and lipid-like molecules	Fatty Acyls	NoSig
POS6165	3-hydroxydecanoyl carnitine	9.25	332.243	[M+H]+	332.244	True	2.71145e+07	2.80263e+07	2.61895e+07	1.96328e+07	1.5975e+07	1.8043e+07	0.00146404	1.51592	0.600193	1.78836e+07	1.83411e+06	1.05893e+06	10.2558	2.71101e+07	918433	530258	3.38779	0.00707135	1.32455	1.32444	2.83445	C17H33NO5	Fatty Acyls	VCRSQDIROUELAR-UHFFFAOYSA-N	CCCCCCCC(O)CC(=O)OC(CC([O-])=O)C[N+](C)(C)C	---	121454166	HMDB0061636	Lipids and lipid-like molecules	Fatty Acyls	UP
NEG11733	LPE(16:0)	12.529	452.278	[M-H]-	452.278	True	1.82103e+08	1.65426e+08	1.46536e+08	9.3174e+07	1.11941e+08	1.20298e+08	0.0125135	1.51827	0.60243	1.08471e+08	1.38908e+07	8.01985e+06	12.806	1.64688e+08	1.7795e+07	1.0274e+07	10.8053	0.0362357	1.24058	1.24051	1.90262	C21H44NO7P	Glycerophospholipids	CKPBBEOJHAPPBT-HXUWFJFHSA-N	[H][C@@](CO)(COP(O)(=O)OCCN)OC(=O)CCCCCCCCCCCCCCC	---	53480922;90657394	HMDB0011473	Lipids and lipid-like molecules	Glycerophospholipids	UP
NEG12881	LPG(18:2)	11.451	507.271	[M-H]-	507.272	True	4.96961e+07	6.8279e+07	5.04632e+07	8.44433e+07	8.73205e+07	1.09318e+08	0.0194027	0.59925	-0.73877	9.36939e+07	1.36069e+07	7.85597e+06	14.5228	5.61461e+07	1.05144e+07	6.07048e+06	18.7268	0.0515437	1.20861	1.20877	1.71214	C24H45O9P	Glycerophospholipids	VEEHTGYBVMTAAF-RFFZIGDUSA-N	CCCCC\C=C/C\C=C/CCCCCCCC(=O)OC[C@@H](O)COP(O)(=O)OC[C@@H](O)CO	---	52927437	HMDB0240600	Lipids and lipid-like molecules	Glycerophospholipids	DOWN
POS10033	LPE(16:0)	12.534	454.293	[M+H]+	454.293	True	5.36366e+08	6.65307e+08	5.00295e+08	2.34856e+08	2.40299e+08	2.88321e+08	0.00409103	2.22923	1.15655	2.54492e+08	2.94229e+07	1.69873e+07	11.5614	5.67323e+08	8.67522e+07	5.00864e+07	15.2915	0.0151034	1.29533	1.29534	2.38817	C21H44NO7P	Lysophosphatidylethanolamines	YVYMBNSKXOXSKW-UHFFFAOYSA-N	CCCCCCCCCCCCCCCC(=O)OC[C@H](COP(=O)(O)OCCN)O	---	9547069;58177710	HMDB0011503	Lipids and lipid-like molecules	Glycerophospholipids	UP
NEG5358	D-Glucose 2-phosphate	0.799	259.022	[M-H]-	259.022	True	1.09364e+08	1.16963e+08	1.12099e+08	115939	6.27519e+08	1.10157e+08	0.529156	0.458701	-1.12437	2.45931e+08	3.35014e+08	1.9342e+08	136.223	1.12809e+08	3.84909e+06	2.22227e+06	3.41205	0.671474	0.44561	0.444917	0.276416	C6H13O9P	Organooxygen compounds	GBXZONVFWYCRPT-UHFFFAOYSA-N	OCC(O)C(O)C(O)C(OP(O)(O)=O)C=O	---	4626994	HMDB0247860	Organic oxygen compounds	Organooxygen compounds	NoSig
NEG3423	Indole-3-Lactic Acid	8.897	204.066	[M-H]-	204.067	True	9.83652e+07	8.73272e+07	8.27704e+07	6.24126e+07	6.79572e+07	6.72487e+07	0.00881444	1.35849	0.442003	6.58728e+07	3.01756e+06	1.74219e+06	4.58088	8.94876e+07	8.01872e+06	4.62961e+06	8.96071	0.0275479	1.26121	1.26118	2.05481	C11H11NO3	Indolyl carboxylic acids and derivatives	XGILAAMKEQUXLS-UHFFFAOYSA-N	O=C(O)C(O)CC1=CNC=2C=CC=CC21	C02043	92904	HMDB0000671	Organoheterocyclic compounds	Indoles and derivatives	UP
NEG2847	Pyroglutamic acid	3.414	188.055	[M+CH3COO]-	188.056	True	1.34628e+08	1.67796e+08	1.71162e+08	6.53342e+07	4.4291e+07	1.3676e+08	0.0668904	1.92213	0.942709	8.21285e+07	4.84684e+07	2.79832e+07	59.0153	1.57862e+08	2.01918e+07	1.16577e+07	12.7908	0.136461	1.06785	1.06746	1.17464	C5H7NO3	Amino acids and derivatives	ODHCTXKNWHHXJC-VKHMYHEASA-N	O=C(O)C1CCC(O)=N1	C01879	7405	HMDB0000267	Organic acids and derivatives	Carboxylic acids and derivatives	NoSig
POS324	1-Pyrrolidinecarboxaldehyde	6.978	100.076	[M+H]+	100.076	True	6.92216e+07	1.07597e+08	1.28113e+08	1.10102e+08	1.36034e+08	1.28641e+08	0.285561	0.813634	-0.297548	1.24926e+08	1.33593e+07	7.71299e+06	10.6938	1.01644e+08	2.98937e+07	1.72591e+07	29.4102	0.427642	0.717219	0.716983	0.544301	C5H9NO	Pyrrolidines	AGRIQBHIKABLPJ-UHFFFAOYSA-N	O=CN1CCCC1	---	77372	HMDB0034587	Organoheterocyclic compounds	Pyrrolidines	NoSig
POS764	4-Ethylaniline	10.65	122.097	[M+H]+	122.096	True	1.49268e+08	2.14635e+08	1.45225e+08	1.81866e+08	2.16326e+08	1.02638e+08	0.948796	1.01657	0.023711	1.66943e+08	5.82946e+07	3.36564e+07	34.9189	1.6971e+08	3.89592e+07	2.24931e+07	22.9564	0.980075	0.0458968	0.0466954	0.0228273	C8H11N	Benzene and substituted derivatives	HRXZRAXKKNUKRF-UHFFFAOYSA-N	CCC1=CC=C(N)C=C1	---	11504	HMDB0246419	Benzenoids	Benzene and substituted derivatives	NoSig
POS11042	LPC(15:0)	12.227	482.324	[M+H]+	482.324	True	6.03349e+08	7.1479e+08	6.31116e+08	3.37872e+08	3.61367e+08	3.60393e+08	0.00099114	1.83956	0.879361	3.5321e+08	1.32927e+07	7.67454e+06	3.76339	6.49752e+08	5.80104e+07	3.34923e+07	8.92809	0.00540702	1.33202	1.33208	3.00387	C23H48NO7P	Lysophosphatidylcholines	RJZVWDTYEWCUAR-JOCHJYFZSA-N	CCCCCCCCCCCCCCC(=O)OC[C@H](COP(=O)([O-])OCC[N+](C)(C)C)O	---	24779458	HMDB0010381	Lipids and lipid-like molecules	Glycerophospholipids	UP
POS9479	9-(3,4-Dimethyl-5-propylfuran-2-yl)nonanoylcarnitine	10.726	438.321	[M+Na]+	438.322	True	3.76132e+07	3.82617e+07	3.72087e+07	1.24785e+07	1.41197e+07	1.0625e+07	1.79702e-05	3.03799	1.60312	1.24077e+07	1.74839e+06	1.00944e+06	14.0912	3.76945e+07	531186	306680	1.40919	0.000501395	1.36257	1.36265	4.74545	C25H43NO5	Fatty Acyls	UETYWWDHIKVRKS-UHFFFAOYSA-N	CCCC1=C(C)C(C)=C(CCCCCCCCC(=O)OC(CC([O-])=O)C[N+](C)(C)C)O1	---	156962822	HMDB0241802	Lipids and lipid-like molecules	Fatty Acyls	UP
POS737	Isoindoline	6.914	120.081	[M+NH4]+	120.081	True	3.16768e+10	3.1874e+10	3.55548e+10	2.90511e+10	3.15544e+10	3.12525e+10	0.179684	1.0789	0.109561	3.06193e+10	1.3665e+09	7.88952e+08	4.46288	3.30352e+10	2.18425e+09	1.26108e+09	6.6119	0.303279	0.861888	0.861964	0.74549	C8H9N	Isoindoles and derivatives	GWVMLCQWXVFZCN-UHFFFAOYSA-N	C1NCC2=CC=CC=C12	---	422478	HMDB0253648	Organoheterocyclic compounds	Isoindoles and derivatives	NoSig
POS9141	15-Methylheptadecanoylcarnitine	11.923	428.374	[M+H]+	428.374	True	5.51861e+08	6.68369e+08	6.35806e+08	2.32547e+08	2.65592e+08	2.86866e+08	0.000725056	2.36436	1.24145	2.61668e+08	2.73713e+07	1.58028e+07	10.4603	6.18678e+08	6.01128e+07	3.47061e+07	9.71632	0.00428028	1.33718	1.33721	3.13963	C25H49NO4	Fatty Acyls	VTDXTUZQAZOUER-UHFFFAOYSA-N	CCC(C)CCCCCCCCCCCCCC(=O)OC(CC([O-])=O)C[N+](C)(C)C	---	156961100	HMDB0240872	Lipids and lipid-like molecules	Fatty Acyls	UP
POS1393	Glutamic acid	1.346	148.06	[M+H]+	148.06	True	4.47044e+09	6.09407e+09	3.39595e+09	3.49979e+09	3.54128e+09	2.80541e+09	0.169672	1.41781	0.503666	3.28216e+09	4.13397e+08	2.38675e+08	12.5953	4.65349e+09	1.35834e+09	7.84238e+08	29.1897	0.291207	0.876999	0.877289	0.770389	C5H9NO4	Amino acids and derivatives	WHUUTDBJXJRKMK-UHFFFAOYSA-N	C(CC(=O)O)[C@@H](C(=O)O)N	C00025	---	HMDB0000148	Organic acids and derivatives	Carboxylic acids and derivatives	NoSig
POS3339	Butyrylcarnitine	7.035	232.154	[M+H]+	232.154	True	1.89012e+09	2.01569e+09	1.85108e+09	7.15598e+08	7.4542e+08	8.09536e+08	3.38656e-05	2.53545	1.34224	7.56851e+08	4.80007e+07	2.77132e+07	6.34216	1.91896e+09	8.60123e+07	4.96592e+07	4.48224	0.00066748	1.36088	1.36088	4.47024	C11H21NO4	Acyl carnitines	QWYFHHGCZUCMBN-SECBINFHSA-N	CCCC(=O)O[C@H](CC([O-])=O)C[N+](C)(C)C	C02862	213144	HMDB0002013	Lipids and lipid-like molecules	Fatty Acyls	UP
POS2359	N-Acetylmethionine	7.515	192.069	[M+H]+	192.069	True	1.13949e+08	1.2404e+08	1.17824e+08	6.22953e+07	6.64006e+07	6.83689e+07	0.000104299	1.80556	0.852447	6.56883e+07	3.09882e+06	1.78911e+06	4.71747	1.18604e+08	5.09056e+06	2.93903e+06	4.29205	0.00135065	1.35594	1.35596	3.98172	C7H13NO3S	Amino acids and derivatives	XUYPXLNMDZIRQH-LURJTMIESA-N	CSCCC(N=C(C)O)C(=O)O	C02712	---	HMDB0011745	Organic acids and derivatives	Carboxylic acids and derivatives	UP
POS961	D-Pipecolic acid	2.184	130.086	[M+H]+	130.087	True	1.3286e+09	1.02518e+09	1.10992e+09	5.63757e+08	5.74551e+08	6.33308e+08	0.00372335	1.95511	0.967249	5.90539e+08	3.74306e+07	2.16106e+07	6.33838	1.15457e+09	1.56561e+08	9.03907e+07	13.5602	0.0140865	1.2988	1.29868	2.42907	C6H11NO2	Carboxylic acids and derivatives	HXEACLLIILLPRG-RXMQYKEDSA-N	OC(=O)[C@H]1CCCCN1	---	736316;6931662	HMDB0005960	Organic acids and derivatives	Carboxylic acids and derivatives	UP
POS2288	Glycylleucine	6.984	189.123	[M+H]+	189.123	True	2.86498e+08	3.08221e+08	3.03284e+08	2.81982e+07	3.35619e+07	2.90938e+07	2.40992e-06	9.88404	3.3051	3.02846e+07	2.87334e+06	1.65892e+06	9.48778	2.99334e+08	1.13871e+07	6.57432e+06	3.80412	0.000210352	1.36563	1.36565	5.618	C8H16N2O3	Peptides	DKEXFJVMVGETOO-LURJTMIESA-N	CC(C)C[C@@H](C(=O)O)NC(=O)CN	C02155	92843;1548899	HMDB0000759	Organic acids and derivatives	Carboxylic acids and derivatives	UP
POS12188	LPC(16:0)	12.615	518.321	[M+Na]+	518.322	True	2.64958e+08	3.20521e+08	2.2467e+08	9.22396e+07	1.0421e+08	9.56394e+07	0.00351573	2.77364	1.47178	9.7363e+07	6.16851e+06	3.56139e+06	6.33558	2.7005e+08	4.81279e+07	2.77867e+07	17.8219	0.0134257	1.30056	1.30064	2.45398	C24H50NO7P	Lysophosphatidylcholines	ASWBNKHCZGQVJV-UHFFFAOYSA-N	CCCCCCCCCCCCCCCC(=O)OC[C@H](COP(=O)([O-])OCC[N+](C)(C)C)O	C04102	460602	HMDB0010382	Lipids and lipid-like molecules	Glycerophospholipids	UP
POS13099	LPC(18:0)	12.065	546.354	[M+Na]+	546.353	True	3.10723e+06	2.09207e+08	1.61081e+08	7.38977e+06	4.08508e+07	6.05657e+07	0.241195	3.43174	1.77894	3.62687e+07	2.68825e+07	1.55206e+07	74.1202	1.24465e+08	1.07818e+08	6.2249e+07	86.6255	0.372147	0.774407	0.774563	0.617632	C26H54NO7P	Lysophosphatidylcholines	IHNKQIMGVNPMTC-RUZDIDTESA-N	CCCCCCCCCCCCCCCCCC(=O)OC[C@H](COP(=O)([O-])OCC[N+](C)(C)C)O	---	497299	HMDB0010384	Lipids and lipid-like molecules	Glycerophospholipids	NoSig
NEG13178	1-Stearoylglycerophosphoserine	11.25	524.298	[M-H2O-H]-	524.299	True	2.7792e+07	3.32313e+07	2.91466e+07	4.61589e+07	6.45774e+07	4.31932e+07	0.0366957	0.585787	-0.771553	5.13098e+07	1.15853e+07	6.68879e+06	22.5791	3.00566e+07	2.83154e+06	1.63479e+06	9.42067	0.0850896	1.14801	1.14754	1.43538	C24H48NO9P	Glycerophospholipids	ZPDQFUYPBVXUKS-UHFFFAOYSA-N	CCCCCCCCCCCCCCCCCC(=O)OCC(O)COP(O)(=O)OCC(N)C(O)=O	---	74819135	HMDB0061698	Lipids and lipid-like molecules	Glycerophospholipids	DOWN
POS2234	Tributylamine	9	186.222	[M+H]+	186.222	True	1.14518e+08	1.42616e+08	1.23985e+08	1.0517e+08	1.09241e+08	9.80974e+07	0.061485	1.21955	0.286344	1.0417e+08	5.63889e+06	3.25561e+06	5.41318	1.2704e+08	1.42961e+07	8.25385e+06	11.2532	0.128216	1.07998	1.08032	1.21123	C12H27N	Tertiary amines	IMFACGCPASFAPR-UHFFFAOYSA-N	CCCCN(CCCC)CCCC	---	7622	HMDB0259165	Organic nitrogen compounds	Organonitrogen compounds	NoSig
NEG6858	D-4'-Phosphopantothenate	6.682	298.069	[M-H]-	298.069	True	9.2958e+07	1.03518e+08	8.62918e+07	5.79632e+07	7.2463e+07	8.00949e+07	0.042557	1.34318	0.425655	7.01737e+07	1.1242e+07	6.4906e+06	16.0203	9.4256e+07	8.68627e+06	5.01502e+06	9.21561	0.0947261	1.13011	1.1301	1.37103	C9H18NO8P	Carboxylic acids and derivatives	XHFVGHPGDLDEQO-ZETCQYMHSA-N	CC(C)(COP(O)(O)=O)[C@@H](O)C(=O)NCCC(O)=O	C03492	41635	HMDB0001016	Organic acids and derivatives	Carboxylic acids and derivatives	UP
POS8681	3-Hydroxy-9-hexadecenoylcarnitine	10.743	414.32	[M+H]+	414.322	True	9.02441e+07	9.35387e+07	8.97318e+07	8.37177e+07	8.31578e+07	7.55789e+07	0.0229355	1.12811	0.173904	8.08182e+07	4.54593e+06	2.6246e+06	5.62489	9.11715e+07	2.06595e+06	1.19278e+06	2.26601	0.0591291	1.19429	1.19462	1.63949	C23H43NO5	Fatty Acyls	XIOFWXBRLXTMQD-RPZXQYRRSA-N	CCCCCC\C=C/CCCCCC(O)CC(=O)O[C@@H](CC([O-])=O)C[N+](C)(C)C	---	156908013	HMDB0013333	Lipids and lipid-like molecules	Fatty Acyls	UP
POS7200	Melibiose	1.451	365.105	[M+Na]+	365.105	True	631976308	6.52805e+08	7.29932e+08	8.65707e+08	7.40206e+08	7.64404e+08	0.0714203	0.849976	-0.234506	7.90106e+08	6.65814e+07	3.84408e+07	8.42689	6.71571e+08	5.16038e+07	2.97935e+07	7.68404	0.14331	1.05692	1.05704	1.14618	C12H22O11	Glycosyl compounds	DLRVVLDZNNYCBX-ABXHMFFYSA-N	OCC1OC(OCC2OC(O)C(O)C(O)C2O)C(O)C(O)C1O	C05402	---	HMDB0000048	Organic oxygen compounds	Organooxygen compounds	NoSig
NEG1589	N-lactoyl-Glycine	0.916	146.044	[M-H]-	146.045	True	2.58356e+09	1.83898e+09	2.44054e+09	2.38482e+09	2.48714e+09	2.54186e+09	0.474325	0.925714	-0.111362	2.47127e+09	7.97155e+07	4.60238e+07	3.22569	2.28769e+09	3.95124e+08	2.28125e+08	17.2717	0.618447	0.501443	0.501714	0.323924	C5H9NO4	Carboxylic acids and derivatives	CLNVOWMDSFOIPV-VKHMYHEASA-N	C[C@H](O)C(=O)NCC(O)=O	---	101947384	HMDB0062183	Organic acids and derivatives	Carboxylic acids and derivatives	NoSig
POS31	Dimethyl sulfoxide	2.073	79.0219	[M+H]+	79.0212	True	3.94961e+09	4.15474e+09	4.22366e+09	4.22452e+09	3.64952e+09	4.45344e+09	0.999482	1.00004	6.13615e-05	4.10916e+09	4.14187e+08	2.39131e+08	10.0796	4.10934e+09	1.42552e+08	8.23024e+07	3.46898	0.999816	0.00122234	0.000472497	0.000225163	C2H6OS	Sulfoxides	IAZDPXIOMUYVGZ-UHFFFAOYSA-N	O=S(C)C	C11143	679	HMDB0002151	Organosulfur compounds	Sulfoxides	NoSig
POS3976	Hexadecanamide	12.216	256.263	[M+H]+	256.263	True	1.2234e+07	2.28439e+08	2.28179e+08	4.19648e+06	1.46057e+08	1.56456e+08	0.568841	1.52865	0.61226	1.02236e+08	8.50641e+07	4.91118e+07	83.2034	1.56284e+08	1.24751e+08	7.2025e+07	79.8233	0.705709	0.404665	0.404871	0.245009	C16H33NO	Fatty amides	HSEMFIZWXHQJAE-UHFFFAOYSA-N	CCCCCCCCCCCCCCCC(=O)N	---	69421	HMDB0012273	Lipids and lipid-like molecules	Fatty Acyls	NoSig
NEG4564	1-Carboxyethylphenylalanine	8.739	236.092	[M-H]-	236.092	True	1.62695e+07	1.57801e+07	1.53713e+07	1.7138e+07	1.84608e+07	2.01933e+07	0.0389097	0.849957	-0.234538	1.85974e+07	1.53224e+06	884639	8.23902	1.5807e+07	449709	259640	2.845	0.0887793	1.14059	1.14081	1.40994	C12H15NO4	Carboxylic acids and derivatives	MSBSJGQKNVMMQB-SCZZXKLOSA-N	C[C@@H](N[C@@H](CC1=CC=CC=C1)C(O)=O)C(O)=O	---	127261991	HMDB0240628	Organic acids and derivatives	Carboxylic acids and derivatives	DOWN
POS782	3-Aminopicolinaldehyde	6.696	123.056	[M+H-H2O]+	123.055	True	1.7298e+08	1.34435e+08	1.47371e+08	5.74775e+07	2.46856e+08	8.45349e+07	0.733642	1.16951	0.225902	1.29623e+08	1.02425e+08	5.91349e+07	79.0173	1.51595e+08	1.96167e+07	1.13257e+07	12.9402	0.829335	0.244773	0.245445	0.134516	C6H6N2O	Pyridines and derivatives	QNJCRBZVUFRESB-UHFFFAOYSA-N	NC1=C(C=O)N=CC=C1	---	12204009	HMDB0245820	Organoheterocyclic compounds	Pyridines and derivatives	NoSig
POS11907	LPC(17:0)	13.497	510.356	[M+H]+	510.355	True	1.96743e+08	2.102e+08	2.20239e+08	5.52826e+07	5.7193e+07	6.08572e+07	2.71199e-05	3.61837	1.85534	5.77776e+07	2.83292e+06	1.63559e+06	4.90315	2.09061e+08	1.17893e+07	6.80658e+06	5.63919	0.000613713	1.36156	1.36156	4.56671	C25H52NO7P	Lysophosphatidylcholines	SRRQPVVYXBTRQK-YXKUJCFLSA-N	CCCCCCCCCCCCCCCCC(=O)OC[C@H](COP(=O)([O-])OCC[N+](C)(C)C)O	---	24779463	HMDB0012108	Lipids and lipid-like molecules	Glycerophospholipids	UP
NEG11975	LPE(P-18:0)	12.208	464.315	[M-H]-	464.314	True	152738	9.55458e+07	1.24772e+08	189051	6.92173e+07	7.07529e+07	0.577759	1.573	0.653519	4.67198e+07	4.03041e+07	2.32696e+07	86.2678	7.34902e+07	6.51715e+07	3.76268e+07	88.6806	0.712138	0.395786	0.395979	0.238253	C23H48NO6P	Glycerophospholipids	KACDZDULGKPXHT-HIVNOOBXSA-N	CCCCCCCCCCCCCCCC\C=C/OC[C@@H](O)COP(O)(=O)OCCN	---	42607470;136212488	HMDB0240598	Lipids and lipid-like molecules	Glycerophospholipids	NoSig
NEG14265	UDP-GalNac	1.537	606.075	[M-H]-	606.074	True	1.92837e+08	1.90459e+08	1.66669e+08	8.36243e+06	3.62245e+07	8.98837e+06	0.000183295	10.2653	3.3597	1.78584e+07	1.59086e+07	9.18481e+06	89.0815	1.83322e+08	1.44704e+07	8.35448e+06	7.89344	0.00183595	1.35215	1.35224	3.73685	C17H27N3O17P2	Pyrimidine nucleotide sugars	LFTYTUAZOPRMMI-UHFFFAOYSA-N	O=C1N=C(O)C=CN1C2OC(COP(=O)(O)OP(=O)(O)OC3OC(CO)C(O)C(O)C3N=C(O)C)C(O)C2O	C00203	23700	HMDB0000304	Nucleosides, nucleotides, and analogues	Pyrimidine nucleotides	UP
POS7843	Pentadecanoylcarnitine	11.333	386.326	[M+H]+	386.327	True	1.58067e+07	3.43567e+07	6.43689e+06	4.21316e+06	1.00331e+07	7.44461e+06	0.237028	2.60941	1.38372	7.23029e+06	2.91588e+06	1.68349e+06	40.3287	1.88668e+07	1.42092e+07	8.2037e+06	75.3135	0.368131	0.779938	0.780176	0.6252	C22H43NO4	Fatty Acyls	MDDWQHVKSHTZTD-UHFFFAOYSA-N	CCCCCCCCCCCCCCC(=O)OC(CC([O-])=O)C[N+](C)(C)C	---	123132011	HMDB0062517	Lipids and lipid-like molecules	Fatty Acyls	NoSig
POS1759	Tyrosine	4.523	165.055	[M+HFA+H]+	165.055	True	3.32658e+09	2.55602e+09	1.9351e+09	4.28147e+09	3.93713e+09	3296158778	0.0676215	0.678929	-0.558668	3.83825e+09	5.00042e+08	2.887e+08	13.0279	2.6059e+09	6.97078e+08	4.02458e+08	26.75	0.137493	1.06586	1.06575	1.16992	C9H11NO3	Amino acids and derivatives	OUYCCCASQSFEME-QMMMGPOBSA-N	N[C@@H](CC1=CC=C(O)C=C1)C(O)=O	C00082	6057;6942100	HMDB0000158	Organic acids and derivatives	Carboxylic acids and derivatives	NoSig
POS689	Betaine	1.366	118.086	[M+H]+	118.086	True	5.85255e+09	6.53972e+09	6.31292e+09	4.28235e+09	4.49677e+09	4.18313e+09	0.00100011	1.44305	0.529122	4.32075e+09	1.60309e+08	9.25542e+07	3.7102	6.23506e+09	3.50142e+08	2.02154e+08	5.61569	0.00543172	1.33179	1.33192	2.99995	C5H11NO2	Amino acids and derivatives	KWIUHFFTVRNATP-UHFFFAOYSA-N	O=C([O-])C[N+](C)(C)C	C00719	247	HMDB0000043	Organic acids and derivatives	Carboxylic acids and derivatives	UP
POS693	Valine	1.539	118.086	[M+H]+	118.086	True	9.01926e+09	9.67395e+09	1.08272e+10	7.15561e+09	8.09396e+09	8.22224e+09	0.0323135	1.2577	0.330783	7.82394e+09	5.82329e+08	3.36208e+08	7.44292	9.84013e+09	9.15349e+08	5.28477e+08	9.3022	0.076083	1.16141	1.16145	1.49062	C5H11NO2	Amino acids and derivatives	KZSNJWFQEVHDMF-BYPYZUCNSA-N	CC(C)[C@H](N)C(O)=O	C00183	6287	HMDB0000883	Organic acids and derivatives	Carboxylic acids and derivatives	UP
POS953	4-Oxo-L-proline	1.514	130.05	[M+H]+	130.05	True	1.20901e+09	1.84622e+09	3.39214e+08	5.47469e+08	6.1819e+08	2.95422e+08	0.223348	2.32324	1.21614	4.87027e+08	1.69661e+08	9.79536e+07	34.836	1.13148e+09	7.56486e+08	4.36758e+08	66.8582	0.354471	0.798637	0.798884	0.651018	C5H7NO3	Carboxylic acids and derivatives	HFXAFXVXPMUQCQ-UHFFFAOYSA-N	OC(=O)C1CC(=O)CN1	C01877	413589;74546988	HMDB0246561	Organic acids and derivatives	Carboxylic acids and derivatives	NoSig
POS6539	Lauroylcarnitine	10.562	344.278	[M+H]+	344.279	True	52072366	5.66227e+07	6.20896e+07	4.30222e+07	4.47514e+07	4.59021e+07	0.0148083	1.27761	0.353443	4.45585e+07	1.44961e+06	836932	3.25327	5.69282e+07	5.01562e+06	2.89577e+06	8.81043	0.0417917	1.22916	1.22917	1.82949	C19H37NO4	Acyl carnitines	FUJLYHJROOYKRA-QGZVFWFLSA-N	CCCCCCCCCCCC(=O)O[C@H](CC([O-])=O)C[N+](C)(C)C	---	168381	HMDB0002250	Lipids and lipid-like molecules	Fatty Acyls	UP
NEG1230	Malic acid	1.381	133.013	[M-H]-	133.014	True	1.3529e+09	1.64976e+09	1.61915e+09	1.34739e+09	2.02001e+09	2.20197e+09	0.316992	0.829861	-0.269059	1.85646e+09	4.50154e+08	2.59897e+08	24.248	1.5406e+09	1.63275e+08	9.42667e+07	10.5981	0.463354	0.678268	0.678246	0.498952	C4H6O5	Beta hydroxy acids and derivatives	BJEPYKJPYRNKOW-REOHCLBHSA-N	OC(=O)C[C@@H](C(=O)O)O	C00149	222656;138628585	HMDB0000156	Organic acids and derivatives	Hydroxy acids and derivatives	NoSig
NEG3860	2-Hydroxydecanedioic acid	8.564	217.108	[M-H]-	217.108	True	1.78533e+07	1.61808e+07	1.56149e+07	2.02248e+07	2.5092e+07	2.68968e+07	0.023231	0.687529	-0.540507	2.40712e+07	3.45115e+06	1.99252e+06	14.3372	1.65497e+07	1.16392e+06	671990	7.03289	0.0597648	1.19341	1.19349	1.63393	C10H18O5	Hydroxy acids and derivatives	LPIOYESQKJFWPQ-UHFFFAOYSA-N	OC(CCCCCCCC(O)=O)C(O)=O	---	128458	HMDB0000424	Organic acids and derivatives	Hydroxy acids and derivatives	DOWN
POS432	Serine	1.305	106.05	[M+H]+	106.05	True	2.08686e+08	5.51791e+08	2.33463e+08	5.62917e+08	6.20258e+08	6.48586e+08	0.0693379	0.542614	-0.882002	6.10587e+08	4.36459e+07	2.51989e+07	7.14818	3.31313e+08	1.9134e+08	1.1047e+08	57.7521	0.140178	1.06192	1.06179	1.15903	C3H7NO3	Amino acids and derivatives	MTCFGRXMJLQNBG-UHFFFAOYSA-N	C(C(C(=O)O)N)O	C00065	---	HMDB0000188	Organic acids and derivatives	Carboxylic acids and derivatives	NoSig
NEG3991	Diethyl phthalate	10.931	221.081	[M-H]-	221.082	True	2.30009e+08	1.90424e+08	2.37851e+08	2.886e+08	3.04461e+08	3.05734e+08	0.0069176	0.732407	-0.449283	2.99599e+08	9.54608e+06	5.51143e+06	3.18629	2.19428e+08	2.54226e+07	1.46777e+07	11.5858	0.0227852	1.27337	1.27344	2.16004	C12H14O4	Benzoic acid esters	FLKPEMZONWLCSK-UHFFFAOYSA-N	CCOC(=O)C1=CC=CC=C1C(=O)OCC	C14175	6781	HMDB0094660	Benzenoids	Benzene and substituted derivatives	DOWN
POS16	Trimethyloxamine	1.38	76.0764	[M+H]+	76.0757	True	2.43414e+08	2.94914e+08	2.40522e+08	1.97181e+08	1.5397e+08	1.86003e+08	0.0212436	1.44996	0.536013	1.79051e+08	2.24286e+07	1.29492e+07	12.5264	2.59617e+08	3.06025e+07	1.76684e+07	11.7876	0.0558273	1.20136	1.20126	1.67277	C3H9NO	Trialkyl amine oxides	UYPYRKYUKCHHIB-UHFFFAOYSA-N	CN(=O)(C)C	C01104	1145	HMDB0000925	Organic nitrogen compounds	Organonitrogen compounds	UP
NEG4656	Balenine	0.868	239.114	[M-H]-	239.114	True	8.15732e+07	8.04185e+07	9.07235e+07	9.83723e+07	8.5627e+07	8.85007e+07	0.261773	0.927395	-0.108744	9.08333e+07	6.68515e+06	3.85967e+06	7.3598	8.42384e+07	5.64587e+06	3.25965e+06	6.70225	0.398365	0.747166	0.747386	0.582075	C10H16N4O3	Peptidomimetics	SLRNWACWRVGMKD-QMMMGPOBSA-N	CN1C=NC(C[C@H](NC(=O)CCN)C(O)=O)=C1	---	10198648;90658938	HMDB0005769	Organic acids and derivatives	Peptidomimetics	NoSig
POS462	3-Ethylpyridine	11.777	108.081	[M+H]+	108.081	True	4.51109e+07	3.5253e+07	3.63425e+07	4.18577e+07	5.2356e+07	6.68116e+07	0.13402	0.724771	-0.464403	5.36751e+07	1.25292e+07	7.23371e+06	23.3426	38902140	5.40447e+06	3.12027e+06	13.8925	0.242268	0.934936	0.935266	0.872829	C7H9N	Pyridines and derivatives	MFEIKQPHQINPRI-UHFFFAOYSA-N	CCC1=CC=CN=C1	---	10823	HMDB0029734	Organoheterocyclic compounds	Pyridines and derivatives	NoSig
POS8281	Palmitoylcarnitine	11.563	400.341	[M+H]+	400.342	True	1.34783e+09	1.4995e+09	1.50444e+09	1.14052e+09	1.20855e+09	1.16546e+09	0.00715899	1.23822	0.308273	1.17151e+09	3.44153e+07	1.98697e+07	2.9377	1.45059e+09	8.90294e+07	5.14011e+07	6.13746	0.0233912	1.27164	1.2718	2.14515	C23H45NO4	Acyl carnitines	XOMRRQXKHMYMOC-NRFANRHFSA-N	CCCCCCCCCCCCCCCC(=O)OC(CC(=O)[O-])C[N+](C)(C)C	C02990	461	HMDB0000222	Lipids and lipid-like molecules	Fatty Acyls	UP
POS7417	8-Methyltridecanoylcarnitine	11.101	372.31	[2M+H]+	372.311	True	4.41152e+08	4.33339e+08	4.24702e+08	4.04856e+08	3.9003e+08	3.66908e+08	0.0189364	1.11826	0.161261	3.87265e+08	1.91244e+07	1.10415e+07	4.93832	4.33064e+08	8.22864e+06	4.75081e+06	1.9001	0.0506352	1.21056	1.21073	1.7227	C21H41NO4	Fatty Acyls	IUTYRWMIFSPDDI-UHFFFAOYSA-N	CCCCCC(C)CCCCCCC(=O)OC(CC([O-])=O)C[N+](C)(C)C	---	156961016	HMDB0240827	Lipids and lipid-like molecules	Fatty Acyls	UP
POS1288	8-Methylquinoline	7.181	144.081	[M+H]+	144.081	True	2.9661e+08	3.28779e+08	3.01113e+08	2.40278e+08	2.5004e+08	2.68228e+08	0.012481	1.22142	0.288556	2.52849e+08	1.41852e+07	8.18981e+06	5.61013	3.08834e+08	1.74191e+07	1.00569e+07	5.64027	0.0362275	1.24072	1.24068	1.90375	C10H9N	Quinolines and derivatives	JRLTTZUODKEYDH-UHFFFAOYSA-N	CC1=C2N=CC=CC2=CC=C1	---	11910	HMDB0247450	Organoheterocyclic compounds	Quinolines and derivatives	UP
NEG6343	16-Hydroxy-10-oxohexadecanoic acid	12.18	285.207	[M-H]-	285.207	True	2.65048e+07	2.21651e+07	2.91919e+07	2.17879e+07	3.0681e+07	2.85128e+07	0.773036	0.961473	-0.056682	2.69939e+07	4.63702e+06	2.67719e+06	17.178	2.59539e+07	3.54565e+06	2.04708e+06	13.6613	0.861121	0.208648	0.208514	0.1118	C16H30O4	Fatty Acyls	ZNMHENLYDLACAS-UHFFFAOYSA-N	OCCCCCCC(=O)CCCCCCCCC(O)=O	---	85837000	HMDB0041287	Lipids and lipid-like molecules	Fatty Acyls	NoSig
POS4845	(2E)-2-Propylpent-2-Enoylcarnitine	8.923	286.2	[M+CH3OH+H]+	286.202	True	2.60095e+07	3.51516e+07	3.1007e+07	1.42255e+07	1.10864e+07	6.21561e+06	0.00457346	2.92342	1.54766	1.05092e+07	4.03603e+06	2.3302e+06	38.4049	3.07227e+07	4.57768e+06	2.64292e+06	14.9	0.0163562	1.29101	1.29117	2.33976	C15H27NO4	Fatty Acyls	QIZCCCHFVSQAQM-UHFFFAOYSA-N	CCCC(=CCC)C(=O)OC(CC([O-])=O)C[N+](C)(C)C	---	---	HMDB0241902	Lipids and lipid-like molecules	Fatty Acyls	UP
POS51	1,3,5-Hexatriene	1.677	81.0705	[M+CH3OH+H]+	81.0699	True	9.77861e+07	1.48035e+08	7.79259e+07	1.03474e+08	2.31055e+08	1.16559e+08	0.404414	0.717703	-0.47854	1.50363e+08	7.01869e+07	4.05224e+07	46.6784	1.07916e+08	3.61358e+07	2.0863e+07	33.4851	0.552997	0.577913	0.577215	0.393174	C6H8	Unsaturated hydrocarbons	AFVDZBIIBXWASR-UHFFFAOYSA-N	C=CC=CC=C	---	16695	HMDB0251502	Hydrocarbons	Unsaturated hydrocarbons	NoSig
POS4668	Glycerophosphocholine	1.326	280.092	[M-H+Na]+	280.092	True	3.64544e+08	3.91226e+08	4.39518e+08	1.28644e+08	1.49055e+08	1.22791e+08	0.000343481	2.98456	1.57752	1.33497e+08	1.37883e+07	7.96069e+06	10.3286	3.98429e+08	3.80028e+07	2.19409e+07	9.53815	0.00259634	1.34658	1.34664	3.4641	C8H21NO6P+	Glycerophosphocholines	SUHOQUVVVLNYQR-MRVPVSSYSA-O	C[N+](C)(C)CCOP(=O)(O)OC[C@H](O)CO	C00670	439285;58381695	HMDB0000086	Lipids and lipid-like molecules	Glycerophospholipids	UP
POS11044	1-O-Hexadecyl-sn-glycero-3-phosphocholine	10.335	482.362	[M+H]+	482.361	True	248876	1.82691e+07	3.27275e+07	3309.03	9.42334e+06	1.27915e+07	0.394183	2.30647	1.20569	7.40604e+06	6.62846e+06	3.82694e+06	89.5006	1.70818e+07	1.62718e+07	9.39454e+06	95.2582	0.545516	0.588545	0.588613	0.404303	C24H52NO6P	Glycerophospholipids	VLBPIWYTPAXCFJ-UHFFFAOYSA-N	CCCCCCCCCCCCCCCCOCC(O)COP([O-])(=O)OCC[N+](C)(C)C	C13903	3983	HMDB0243890	Lipids and lipid-like molecules	Glycerophospholipids	NoSig
POS4030	Glycerophosphocholine	1.323	258.11	[M+H]+	258.11	True	8.00352e+08	8.38729e+08	9.4845e+08	4.11882e+08	4.66224e+08	3.96262e+08	0.000880698	2.03044	1.02179	4.24789e+08	3.67233e+07	2.12022e+07	8.64507	8.6251e+08	7.686e+07	4.43751e+07	8.9112	0.00495951	1.33403	1.33411	3.05517	C8H20NO6P	Glycerophosphocholines	SUHOQUVVVLNYQR-MRVPVSSYSA-N	O=P([O-])(OCC[N+](C)(C)C)OCC(O)CO	C00670	71920	HMDB0000086	Lipids and lipid-like molecules	Glycerophospholipids	UP
NEG2298	Glycerol 3-phosphate	0.917	171.005	[M-H]-	171.006	True	1.67977e+08	1.64103e+08	1.52077e+08	2.90762e+08	3.03774e+08	3.1735e+08	9.46818e-05	0.53094	-0.91338	3.03962e+08	1.32951e+07	7.67592e+06	4.37393	1.61386e+08	8.29124e+06	4.78695e+06	5.13753	0.00126012	1.35647	1.3565	4.02373	C3H9O6P	Glycerophosphates	AWUCVROLDVIAJX-GSVOUGTGSA-N	O=P(O)(O)OCC(O)CO	C00093	439162	HMDB0000126	Lipids and lipid-like molecules	Glycerophospholipids	DOWN
POS1168	5-Methylpyrazine-2-carboxylic Acid	3.712	139.05	[M+H]+	139.05	True	1.27351e+08	7.93667e+07	1.88684e+08	7.36454e+07	3.00896e+08	3.44495e+08	0.295556	0.549905	-0.862746	2.39679e+08	1.45432e+08	8.39654e+07	60.678	1.31801e+08	5.47945e+07	3.16356e+07	41.5738	0.439914	0.704447	0.704499	0.52936	C6H6N2O2	Diazines	RBYJWCRKFLGNDB-UHFFFAOYSA-N	CC1=NC=C(N=C1)C(O)=O	---	122831	HMDB0246827	Organoheterocyclic compounds	Diazines	NoSig
POS3623	Tiglylcarnitine	7.259	244.154	[M+Na]+	244.155	True	3.70124e+07	4.48699e+07	3.91576e+07	1.33239e+07	1.42571e+07	1.50999e+07	0.000404866	2.83593	1.50382	1.4227e+07	888361	512896	6.24421	4.03466e+07	4.0615e+06	2.34491e+06	10.0665	0.00287773	1.34482	1.34486	3.39269	C12H21NO4	Fatty Acyls	WURBQCVBQNMUQT-OLKPEBQYSA-N	C\C=C(/C)C(=O)O[C@H](CC([O-])=O)C[N+](C)(C)C	---	91825636	HMDB0002366	Lipids and lipid-like molecules	Fatty Acyls	UP
NEG12322	LPE(18:0)	11.332	480.31	[M-H]-	480.309	True	3.15342e+06	1.62582e+08	4.08876e+08	3.02466e+06	8.50563e+07	3.04209e+08	0.703047	1.46476	0.550667	1.30763e+08	1.55708e+08	8.98978e+07	119.076	1.91537e+08	2.04405e+08	1.18013e+08	106.718	0.801421	0.274626	0.274381	0.153016	C23H48NO7P	Glycerophospholipids	KIHAGWUUUHJRMS-JOCHJYFZSA-N	[H][C@@](CO)(COP(O)(=O)OCCN)OC(=O)CCCCCCCCCCCCCCCCC	---	53480667;90658453	HMDB0011129	Lipids and lipid-like molecules	Glycerophospholipids	NoSig
POS3260	N,N,N-Trimethyl-L-alanyl-L-proline betaine	7.059	229.155	[M+NH4]+	229.155	True	7.82193e+08	8.50788e+08	8.21535e+08	2.82008e+08	2.89949e+08	3.10762e+08	1.7275e-05	2.78063	1.47541	2.9424e+08	1.48492e+07	8.5732e+06	5.04664	8.18172e+08	3.44208e+07	1.98729e+07	4.20704	0.000501395	1.36274	1.36274	4.76258	C11H20N2O3	Carboxylic acids and derivatives	KXONJPJIFNGMCN-IUCAKERBSA-N	C[C@@H](C(=O)N1CCC[C@H]1C([O-])=O)[N+](C)(C)C	---	134218393	HMDB0240365	Organic acids and derivatives	Carboxylic acids and derivatives	UP
POS1019	1,2-Dihydroquinoline	7.18	132.081	[M+NH4]+	132.081	True	1.99273e+08	2.44861e+08	2.12493e+08	1.76809e+08	1.86844e+08	1.83105e+08	0.0573726	1.20095	0.264175	1.82252e+08	5.07137e+06	2.92796e+06	2.78261	2.18876e+08	2.34544e+07	1.35414e+07	10.7159	0.121087	1.09024	1.09045	1.2413	C9H9N	Quinolines and derivatives	IRFSXVIRXMYULF-UHFFFAOYSA-N	C1NC2=CC=CC=C2C=C1	---	5231402	HMDB0244077	Organoheterocyclic compounds	Quinolines and derivatives	NoSig
NEG2804	o-Cresol sulfate	8.799	187.006	[M-H]-	187.006	True	1.08927e+07	1.24344e+07	1.07017e+07	1.3795e+07	1.38723e+07	1.49077e+07	0.012192	0.799267	-0.32325	1.41917e+07	621356	358740	4.37832	1.13429e+07	950100	548540	8.37614	0.0357281	1.24211	1.24218	1.91392	C7H8O4S	Organic sulfuric acids and derivatives	CYGSXDXRHXMAOV-UHFFFAOYSA-N	CC1=C(OS(O)(=O)=O)C=CC=C1	---	11615528	HMDB0240655	Organic acids and derivatives	Organic sulfuric acids and derivatives	DOWN
NEG1168	2-Acetolactate	6.767	131.033	[M-H]-	131.034	True	5.64262e+07	4.73949e+07	4.24455e+07	3.6013e+07	4.50574e+07	3.75555e+07	0.136501	1.23301	0.302181	3.9542e+07	4.83835e+06	2.79342e+06	12.236	4.87555e+07	7.08896e+06	4.09281e+06	14.5398	0.246099	0.930819	0.931033	0.864863	C5H8O4	Keto acids and derivatives	NMDWGEGFJUBKLB-UHFFFAOYSA-N	CC(=O)C(C)(O)C(O)=O	C00900	22	HMDB0006833	Organic acids and derivatives	Keto acids and derivatives	NoSig
POS2006	Indole-3-acetic acid	9.469	176.07	[M+H]+	176.071	True	6.22166e+07	6.65274e+07	6.96578e+07	1.40256e+07	1.73526e+07	2.02775e+07	6.42276e-05	3.84085	1.94143	1.72186e+07	3.12807e+06	1.80599e+06	18.1668	6.61339e+07	3.73621e+06	2.1571e+06	5.64946	0.000981077	1.35843	1.35842	4.19228	C10H9NO2	Indole-3-acetic acid derivatives	SEOVTRFCIGRIMH-UHFFFAOYSA-N	OC(=O)CC1=CNC2=C1C=CC=C2	C00954	---	HMDB0000197	Organoheterocyclic compounds	Indoles and derivatives	UP
POS6349	Erucamide	13.294	338.342	[M+H]+	338.342	True	5.33574e+08	6.87379e+08	1.92832e+08	1.83561e+09	1.97428e+09	1.79717e+08	0.222295	0.354367	-1.49668	1.32987e+09	9.98472e+08	5.76468e+08	75.0804	4.71262e+08	2.53093e+08	1.46124e+08	53.7055	0.354165	0.800923	0.800343	0.653071	C22H43NO	Fatty amides	UAUDZVJPLUQNMU-KTKRTIGZSA-N	N=C(O)CCCCCCCCCCCC=CCCCCCCCC	---	5365371	HMDB0244507	Lipids and lipid-like molecules	Fatty Acyls	NoSig
POS1120	Hypoxanthine	6.739	137.046	[M+H]+	137.046	True	2.97916e+10	3.39127e+10	3.1983e+10	1.7284e+10	1.7792e+10	1.7462e+10	0.000277472	1.82129	0.864964	1.75127e+10	2.57768e+08	1.48822e+08	1.47189	3.18958e+10	2.06197e+09	1.19048e+09	6.46471	0.00223073	1.34869	1.34874	3.55678	C5H4N4O	Purinones	FDGQSTZJBFJUBT-UHFFFAOYSA-N	OC1=NC=NC2=C1NC=N2	C00262	135398638	HMDB0000157	Organoheterocyclic compounds	Imidazopyrimidines	UP
POS568	Uracil	5.165	113.035	[M+H]+	113.035	True	1.42e+10	1.00073e+10	1.55319e+10	1.12189e+10	7.53529e+09	6.94378e+09	0.0934876	1.54639	0.628909	8.56599e+09	2.31645e+09	1.3374e+09	27.0424	1.32464e+10	2.88308e+09	1.66455e+09	21.765	0.180477	1.01022	1.0101	1.02925	C4H4N2O2	Pyrimidones	ISAKRJDGNUQOIC-UHFFFAOYSA-N	OC1=NC=CC(O)=N1	C00106	1174	HMDB0000300	Organoheterocyclic compounds	Diazines	NoSig
NEG2731	3-Phosphoglycerate	0.941	184.985	[M-H]-	184.986	True	3.49031e+08	1.81215e+08	1.74953e+08	7.45208e+08	5.24801e+08	9.19605e+08	0.0179047	0.322065	-1.63458	7.29871e+08	1.97848e+08	1.14228e+08	27.1073	2.35066e+08	9.87461e+07	5.70111e+07	42.0078	0.0488384	1.21474	1.21514	1.74703	C3H7O7P	Sugar acids and derivatives	OSJPPGNTCRNQQC-UHFFFAOYSA-N	O=C(O)C(O)COP(=O)(O)O	C00197	724	HMDB0000807	Organic oxygen compounds	Organooxygen compounds	DOWN
NEG8363	D-myo-Inositol 1,4-bisphosphate	1.086	338.989	[M-H]-	338.988	True	2.29468e+07	3.24602e+07	4.41081e+07	4.4444e+07	77652551	7.46609e+07	0.057149	0.505775	-0.983432	6.55858e+07	1.83703e+07	1.06061e+07	28.0096	3.31717e+07	1.05986e+07	6.11909e+06	31.9507	0.120824	1.09114	1.09101	1.24299	C6H14O12P2	Organooxygen compounds	PELZSPZCXGTUMR-RTPHHQFDSA-N	O[C@H]1[C@@H](O)[C@@H](OP(O)(O)=O)[C@H](O)[C@@H](O)[C@@H]1OP(O)(O)=O	C01220	---	HMDB0000968	Organic oxygen compounds	Organooxygen compounds	NoSig
NEG2557	Myoinositol	0.997	179.055	[M-H]-	179.056	True	1.44402e+08	1.71106e+08	1.72914e+08	1.10755e+08	1.39747e+08	1.23342e+08	0.0375257	1.30648	0.385688	1.24615e+08	1.45378e+07	8.3934e+06	11.6662	1.62807e+08	1.59652e+07	9.21749e+06	9.80616	0.0863586	1.1447	1.14499	1.42567	C6H12O6	Organooxygen compounds	CDAISMWEOUEBRE-GPIVLXJGSA-N	O[C@H]1[C@H](O)[C@@H](O)[C@H](O)[C@@H](O)[C@@H]1O	C06153	---	HMDB0006088	Organic oxygen compounds	Organooxygen compounds	UP
POS8683	Heptadecanoyl carnitine	11.737	414.357	[M+H]+	414.358	True	1.18599e+08	1.25575e+08	1.33224e+08	5.16812e+07	6.11128e+07	5.36399e+07	0.000161328	2.26756	1.18114	5.5478e+07	4.97718e+06	2.87358e+06	8.97146	1.258e+08	7.31477e+06	4.22318e+06	5.81462	0.00170581	1.35311	1.35318	3.79229	C24H47NO4	Fatty Acyls	DWSFAVOTORHAAL-UHFFFAOYSA-N	CCCCCCCCCCCCCCCCC(=O)OC(CC([O-])=O)C[N+](C)(C)C	---	53477803	HMDB0006210	Lipids and lipid-like molecules	Fatty Acyls	UP
POS7363	cis-5-Tetradecenoylcarnitine	10.82	370.295	[M+Na]+	370.296	True	1.07397e+08	1.09278e+08	1.03021e+08	7.72527e+07	7.76838e+07	7.33244e+07	0.000192216	1.40057	0.486018	7.6087e+07	2.40216e+06	1.38689e+06	3.15712	1.06565e+08	3.21029e+06	1.85346e+06	3.01251	0.0018791	1.3518	1.35187	3.71621	C21H39NO4	Fatty Acyls	NNCBVXBBLABOCB-SEYXRHQNSA-N	CCCCCCCC\C=C/CCCC(=O)OC(CC([O-])=O)C[N+](C)(C)C	---	22833575	HMDB0002014	Lipids and lipid-like molecules	Fatty Acyls	UP
POS5457	Glutathione (oxidized)	6.692	307.083	[M+2H]+	307.083	True	1.21239e+10	1.27024e+10	1.31981e+10	5.32793e+09	6.0381e+09	6.21838e+09	7.87409e-05	2.16239	1.11263	5.86147e+09	4.7077e+08	2.71799e+08	8.03161	1.26748e+10	5.37623e+08	3.10397e+08	4.24167	0.00114549	1.35746	1.35746	4.1038	C20H32N6O12S2	Peptides	YPZRWBKMTBYPTK-BJDJZHNGSA-N	C(CC(=O)N[C@@H](CSSC[C@@H](C(=O)NCC(=O)O)NC(=O)CC[C@@H](C(=O)O)N)C(=O)NCC(=O)O)[C@@H](C(=O)O)N	C00127	65359;11215652	HMDB0003337	Organic acids and derivatives	Carboxylic acids and derivatives	UP
POS7338	Cholesterol	13.507	369.351	[M+H-H2O]+	369.352	True	9.05685e+08	1.09277e+09	7.81292e+08	1.25584e+09	1.03007e+09	1.25242e+09	0.0974792	0.78561	-0.348114	1.17944e+09	1.29373e+08	7.46937e+07	10.969	9.26582e+08	1.56787e+08	9.05209e+07	16.921	0.186708	1.00192	1.00217	1.01109	C27H46O	Cholesterols and derivatives	HVYWMOMLDIMFJA-DPAQBDIFSA-N	C[C@H](CCCC(C)C)[C@H]1CC[C@@H]2[C@@]1(CC[C@H]3[C@H]2CC=C4[C@@]3(CC[C@@H](C4)O)C)C	C00187	5997	HMDB0000067	Lipids and lipid-like molecules	Steroids and steroid derivatives	NoSig
POS1660	2-Ethyl-3-hydroxy-2,4,4-trimethyloxazolidine	2.508	160.133	[M+H]+	160.133	True	3.72481e+08	2.3213e+08	4.64223e+08	9.94201e+07	6.02842e+08	2.50721e+08	0.825087	1.12157	0.165514	3.17661e+08	2.583e+08	1.4913e+08	81.3132	3.56278e+08	1.16892e+08	6.74877e+07	32.8092	0.895431	0.159655	0.160182	0.0835005	C8H17NO2	Azolidines	WZZOSBRJFGEGCU-UHFFFAOYSA-N	CCC1(C)OCC(C)(C)N1O	---	125626	HMDB0245114	Organoheterocyclic compounds	Azolidines	NoSig
POS1317	3-Hydroxyadipic acid 3,6-lactone	3.484	145.049	[M+H]+	145.05	True	1.13996e+09	2.72302e+09	5.93906e+08	3.44416e+08	8.91024e+08	1.0667e+09	0.346938	1.93598	0.953063	7.67378e+08	3.76681e+08	2.17477e+08	49.0867	1.48563e+09	1.10585e+09	6.38461e+08	74.4363	0.498189	0.642486	0.642638	0.459748	C6H8O4	Lactones	BWEICTHJUIJQPH-UHFFFAOYSA-N	[H]OC(=O)CC1([H])CCC(=O)O1	---	194109	HMDB0029171	Organoheterocyclic compounds	Lactones	NoSig
POS2310	3-(Indol-3-yl)propionic acid	9.971	190.086	[M+H]+	190.086	True	1.01369e+08	1.02581e+08	1.06234e+08	7.37809e+07	7.41398e+07	7.88441e+07	0.000221834	1.36786	0.451924	7.55883e+07	2.82531e+06	1.63119e+06	3.73776	1.03394e+08	2.53238e+06	1.46207e+06	2.44924	0.00203955	1.35079	1.35072	3.65397	C11H11NO2	Indolyl carboxylic acids and derivatives	GOLXRNDWAUTYKT-UHFFFAOYSA-N	O=C(O)CCC1=CNC=2C=CC=CC21	C22236	3744	HMDB0002302	Organoheterocyclic compounds	Indoles and derivatives	UP
NEG2657	3,5-Dihydroxyphenylglycine	6.704	182.044	[M-H]-	182.046	True	1.45734e+07	1.27322e+07	1.18951e+07	1.12858e+07	9.65531e+06	1.17648e+07	0.100247	1.19858	0.261331	1.0902e+07	1.10586e+06	638471	10.1437	1.30669e+07	1.37015e+06	791059	10.4857	0.190812	0.997198	0.996751	0.998931	C8H9NO4	Carboxylic acids and derivatives	HOOWCUZPEFNHDT-UHFFFAOYSA-N	NC(C(O)=O)C1=CC(O)=CC(O)=C1	---	108001	HMDB0243702	Organic acids and derivatives	Carboxylic acids and derivatives	NoSig
POS10463	(8Z,11Z,13E,15S)-15-Hydroxyicosa-8,11,13-trienoylcarnitine	11.119	466.351	[M+CH3OH+H]+	466.353	True	3.27808e+07	3.10557e+07	2.994e+07	1.08595e+07	1.06432e+07	9.37455e+06	2.46645e-05	3.03708	1.60268	1.02924e+07	802219	463161	7.79428	3.12588e+07	1.43124e+06	826325	4.57866	0.000579616	1.36182	1.36183	4.60793	C27H47NO5	Fatty Acyls	NZRDWBUUKBZXKA-UHFFFAOYSA-N	CCCCCC(O)C=CC=CCC=CCCCCCCC(=O)OC(CC([O-])=O)C[N+](C)(C)C	---	---	HMDB0241584	Lipids and lipid-like molecules	Fatty Acyls	UP
POS5725	7-Methylnonanoylcarnitine	9.953	316.248	[M+H]+	316.249	True	1.91862e+07	1.99514e+07	2.15836e+07	7.87297e+06	6.83594e+06	1.11509e+07	0.00142203	2.34809	1.23149	8.61993e+06	2.25236e+06	1.3004e+06	26.1297	2.02404e+07	1.22452e+06	706974	6.04986	0.00692321	1.32522	1.32506	2.84709	C17H33NO4	Fatty Acyls	MTPSYDDQPQURAJ-UHFFFAOYSA-N	CCC(C)CCCCCC(=O)OC(CC([O-])=O)C[N+](C)(C)C	---	156960941	HMDB0240789	Lipids and lipid-like molecules	Fatty Acyls	UP
NEG1799	Histidine	0.845	154.061	[M-H]-	154.062	True	4.66874e+08	3.93238e+08	5.12793e+08	4.24627e+08	4.71623e+08	4.23362e+08	0.666658	1.04039	0.0571185	4.39871e+08	2.7506e+07	1.58806e+07	6.2532	4.57635e+08	6.03108e+07	3.48205e+07	13.1788	0.7763	0.308978	0.309138	0.176097	C6H9N3O2	Amino acids and derivatives	HNDVDQJCIGZPNO-IFJFHIPQNA-N	C(C1=CN=CN1)[C@@H](C(=O)O)N	C00135	6274;6971009	HMDB0000177	Organic acids and derivatives	Carboxylic acids and derivatives	NoSig
NEG540	Serine	0.843	104.034	[M-H]-	104.035	True	1.07559e+08	1.56478e+08	1.04083e+08	1.8827e+08	1.82772e+08	1.03567e+08	0.331772	0.775627	-0.366565	1.58203e+08	4.73958e+07	2.7364e+07	29.9589	1.22706e+08	2.92987e+07	1.69156e+07	23.877	0.477649	0.661115	0.660526	0.479161	C3H7NO3	Amino acids and derivatives	MTCFGRXMJLQNBG-UHFFFAOYSA-N	C([C@@H](C(=O)O)N)O	C00065	---	HMDB0000187	Organic acids and derivatives	Carboxylic acids and derivatives	NoSig
NEG9028	Pantetheine 4'-phosphate	6.88	357.09	[M-H]-	357.089	True	3.84563e+06	1.40817e+07	3.34761e+06	1.2924e+07	1.67815e+07	1.24415e+07	0.137767	0.504779	-0.986276	1.4049e+07	2.37867e+06	1.37333e+06	16.9313	7.09163e+06	6.05866e+06	3.49797e+06	85.4339	0.24794	0.929271	0.928887	0.860855	C11H23N2O7PS	Carboxylic acids and derivatives	JDMUPRLRUUMCTL-VIFPVBQESA-N	CC(C)(COP(O)(O)=O)[C@@H](O)C(=O)NCCC(=O)NCCS	C01134	115254	HMDB0001416	Organic acids and derivatives	Carboxylic acids and derivatives	NoSig
POS2420	Caffeine	7.621	195.088	[M+H]+	195.088	True	7.58151e+07	8.16853e+07	8.17391e+07	6.97037e+07	6.6945e+07	7.28041e+07	0.018653	1.14221	0.191831	6.98176e+07	2.93124e+06	1.69235e+06	4.19842	7.97465e+07	3.40478e+06	1.96575e+06	4.26951	0.0499867	1.21211	1.21193	1.72925	C8H10N4O2	Xanthines	RYYVLZVUVIJVGH-UHFFFAOYSA-N	O=C1C2=C(N=CN2C)N(C(=O)N1C)C	C07481	2519	HMDB0001847	Organoheterocyclic compounds	Imidazopyrimidines	UP
POS3005	5-hydroxycalamenene	1.003	219.174	[M+H]+	219.174	True	3.83808e+07	4.43914e+07	4.26612e+07	2.5422e+07	2.69299e+07	2.71023e+07	0.00119367	1.57869	0.658728	2.64847e+07	924343	533670	3.4901	4.18111e+07	3.09415e+06	1.78641e+06	7.40029	0.00610321	1.32857	1.32863	2.92311	C15H22O	Prenol lipids	FDMKIGKOMRSCAW-NWDGAFQWSA-N	[H][C@]1(C)CC[C@]([H])(C(C)C)C2=C1C(O)=CC(C)=C2	---	442519	HMDB0303912	Lipids and lipid-like molecules	Prenol lipids	UP
POS7899	2-Hydroxymyristoylcarnitine	10.5	388.305	[M+H]+	388.306	True	6.76958e+07	7.35415e+07	6.99064e+07	6.48974e+07	6.28093e+07	6.50593e+07	0.0297051	1.09534	0.131375	6.42553e+07	1.2549e+06	724518	1.95299	7.03813e+07	2.95164e+06	1.70413e+06	4.19379	0.0713156	1.1702	1.17016	1.52717	C21H41NO5	Fatty Acyls	WWDZVVWQNWNRDM-UHFFFAOYSA-N	CCCCCCCCCCCCC(O)C(=O)OC(CC([O-])=O)C[N+](C)(C)C	---	53481642	HMDB0013166	Lipids and lipid-like molecules	Fatty Acyls	UP
NEG12285	LPE(18:1)	12.568	478.294	[M-H]-	478.294	True	3.29088e+07	2.28587e+07	2.6033e+07	1.15679e+08	3.00677e+07	2.78885e+07	0.35157	0.471106	-1.08588	5.78783e+07	5.00686e+07	2.89071e+07	86.5066	2.72668e+07	5.13744e+06	2.9661e+06	18.8414	0.502478	0.637121	0.637232	0.453988	C23H46NO7P	Lysophosphatidylethanolamines	PYVRVRFVLRNJLY-MZMPXXGTSA-N	CCCCCCCC/C=C\CCCCCCCC(=O)OC[C@H](COP(=O)(O)OCCN)O	---	9547071	HMDB0011506	Lipids and lipid-like molecules	Glycerophospholipids	NoSig
POS7545	Riboflavin	7.583	377.145	[M+H]+	377.146	True	1.66931e+07	1.63334e+07	1.75682e+07	1.73667e+07	1.74383e+07	1.67639e+07	0.486919	0.98111	-0.0275126	1.71896e+07	370412	213857	2.15486	1.68649e+07	635047	366645	3.7655	0.631651	0.488758	0.488501	0.312543	C17H20N4O6	Flavins	AUNGANRZJHBGPY-UHFFFAOYSA-N	CC1=CC2=C(C=C1C)N(C3=NC(=O)NC(=O)C3=N2)C[C@@H]([C@@H]([C@@H](CO)O)O)O	C00255	493570	HMDB0000244	Organoheterocyclic compounds	Pteridines and derivatives	NoSig
POS780	3-Aminopicolinaldehyde	2.829	123.056	[M+NH4]+	123.055	True	5.81151e+10	6.36865e+10	6.09934e+10	3.8277e+10	4.02125e+10	4.17196e+10	0.000384723	1.52064	0.60468	4.00697e+10	1.72575e+09	9.96365e+08	4.30688	6.09317e+10	2.78622e+09	1.60863e+09	4.5727	0.00278184	1.34541	1.34542	3.41485	C6H6N2O	Pyridines and derivatives	QNJCRBZVUFRESB-UHFFFAOYSA-N	NC1=C(C=O)N=CC=C1	---	12204009	HMDB0245820	Organoheterocyclic compounds	Pyridines and derivatives	UP
POS5244	Palmidrol	13.487	300.289	[M+H]+	300.29	True	7.69007e+07	9.88205e+07	9.67772e+07	6.15753e+07	5.72602e+07	6.37989e+07	0.0144722	1.49204	0.577289	6.08781e+07	3.32461e+06	1.91946e+06	5.46109	9.08328e+07	1.21087e+07	6.99099e+06	13.3308	0.0409375	1.23078	1.23078	1.83947	C18H37NO2	Carboximidic acids	HXYVTAGFYLMHSO-UHFFFAOYSA-N	CCCCCCCCCCCCCCCC(=O)NCCO	C16512	4671	HMDB0002100	Organic acids and derivatives	Carboximidic acids and derivatives	UP
POS3259	Prolylleucine	1.509	229.155	[M+H]+	229.155	True	1.96116e+08	2.25584e+08	2.38753e+08	1.71005e+08	1.68636e+08	1.55696e+08	0.0150332	1.33334	0.415046	1.65112e+08	8.24045e+06	4.75763e+06	4.99082	2.20151e+08	2.18316e+07	1.26045e+07	9.91664	0.0423286	1.22795	1.22811	1.82295	C11H20N2O3	Peptides	ZKQOUHVVXABNDG-IUCAKERBSA-N	CC(C)CC(N=C(O)C1CCCN1)C(O)=O	---	3527720;44368932	HMDB0253028	Organic acids and derivatives	Carboxylic acids and derivatives	UP
POS962	Pipecolic acid	1.132	130.086	[M+H]+	130.086	True	5.1496e+08	5.2135e+08	5.38579e+08	5.94453e+08	6.55799e+08	6.48736e+08	0.00634646	0.82933	-0.269982	6.32996e+08	3.35653e+07	1.9379e+07	5.30261	5.24963e+08	1.2217e+07	7.05346e+06	2.3272	0.0214128	1.27752	1.27745	2.19747	C6H11NO2	Amino acids and derivatives	HXEACLLIILLPRG-YFKPBYRVSA-N	OC(=O)[C@@H]1CCCCN1	C00408	439227	HMDB0000070	Organic acids and derivatives	Carboxylic acids and derivatives	DOWN
POS684	Betaine	13.403	118.086	[M]+	118.086	True	5.79185e+07	1.03156e+08	1.57202e+08	1.14072e+08	2.5385e+08	1.6399e+08	0.227188	0.598365	-0.740903	1.77304e+08	7.08338e+07	4.08959e+07	39.9505	1.06092e+08	4.97069e+07	2.86983e+07	46.8526	0.357303	0.794051	0.793587	0.643614	C5H12NO2+	Amino acids and derivatives	KWIUHFFTVRNATP-UHFFFAOYSA-O	C[N+](C)(C)CC(=O)O	C00719	248	HMDB0000043	Organic acids and derivatives	Carboxylic acids and derivatives	NoSig
POS4914	Lauryl Diethanolamide	12.025	288.253	[M+H]+	288.253	True	3.04521e+07	3.21292e+07	2.88228e+07	5.39168e+07	5.78712e+07	5.96239e+07	0.000161926	0.533242	-0.907137	5.71373e+07	2.92344e+06	1.68785e+06	5.11652	3.0468e+07	1.65328e+06	954523	5.42629	0.00170581	1.35314	1.35315	3.79068	C16H33NO3	N-acyl amines	AOMUHOFOVNGZAN-UHFFFAOYSA-N	CCCCCCCCCCCC(=O)N(CCO)CCO	---	8430	HMDB0032358	Lipids and lipid-like molecules	Fatty Acyls	DOWN
POS1123	1-Methylnicotinamide	1.397	137.071	[M]+	137.071	True	1.18583e+08	2.35542e+08	1.38832e+08	1.72847e+08	1.13143e+08	1.21399e+08	0.521421	1.21004	0.275055	1.35796e+08	3.23513e+07	1.8678e+07	23.8234	1.64319e+08	6.25064e+07	3.60881e+07	38.0396	0.664418	0.4527	0.45282	0.282812	C7H9N2O	Pyridinecarboxamides	LDHMAVIPBRSVRG-UHFFFAOYSA-O	C[N+]1=CC=CC(=C1)C(N)=O	C02918	457	HMDB0000699	Organoheterocyclic compounds	Pyridines and derivatives	NoSig
NEG8911	Prostaglandin F2b	10.207	353.233	[M-H]-	353.233	True	6.92208e+07	6.87931e+07	6.03628e+07	5.03959e+07	5.19472e+07	5.46314e+07	0.0117122	1.26375	0.337712	5.23248e+07	2.14287e+06	1.23719e+06	4.09533	6.61256e+07	4.99525e+06	2.88401e+06	7.55418	0.0346544	1.24477	1.24471	1.93136	C20H34O5	Fatty Acyls	PXGPLTODNUVGFL-JZFBHDEDSA-N	CCCCC[C@H](O)\C=C\[C@H]1[C@H](O)C[C@@H](O)[C@@H]1C\C=C/CCCC(O)=O	C02314	5280506	HMDB0001483	Lipids and lipid-like molecules	Fatty Acyls	UP
POS3289	Ergothioneine	1.452	230.096	[M+H]+	230.096	True	3.97472e+08	3.98116e+08	4.66769e+08	1.10479e+08	9.82364e+07	1.00419e+08	0.000167434	4.08352	2.02981	1.03045e+08	6.53001e+06	3.7701e+06	6.33706	4.20786e+08	3.98243e+07	2.29926e+07	9.46427	0.00174875	1.35292	1.35291	3.77616	C9H15N3O2S	Amino acids and derivatives	SSISHJJTAXXQAX-ZETCQYMHSA-N	O=C(O)C(CC1=CN=C([S-])N1)[N+](C)(C)C	C05570	5351619;57509571	HMDB0003045	Organic acids and derivatives	Carboxylic acids and derivatives	UP
NEG1282	Threonic acid	0.97	135.029	[M-H]-	135.03	True	1.68472e+09	1.81839e+09	1.91276e+09	1.72684e+09	2.06448e+09	2.22664e+09	0.281583	0.899952	-0.152081	2.00598e+09	2.54982e+08	1.47214e+08	12.711	1.80529e+09	1.14583e+08	6.61544e+07	6.34707	0.422377	0.72192	0.721997	0.550393	C4H8O5	Sugar acids and derivatives	JPIJQSOTBSSVTP-GBXIJSLDSA-N	C([C@@H]([C@H](C(=O)O)O)O)O	C01620	5460407	HMDB0000943	Organic oxygen compounds	Organooxygen compounds	NoSig
POS6086	Docosahexaenoic acid	13.41	329.248	[M+H]+	329.247	True	1.04705e+08	9.49014e+07	8.52193e+07	7.68079e+07	8.63171e+07	8.40705e+07	0.117937	1.15223	0.204425	8.23985e+07	4.9702e+06	2.86955e+06	6.0319	9.49418e+07	9.74272e+06	5.62496e+06	10.2618	0.216395	0.963547	0.963578	0.928351	C22H32O2	Very long-chain fatty acids	MBMBGCFOFBJSGT-KUBAVDMBSA-N	CC/C=C\C/C=C\C/C=C\C/C=C\C/C=C\C/C=C\CCC(=O)O	C06429	445580	HMDB0002183	Lipids and lipid-like molecules	Fatty Acyls	NoSig
NEG2204	Uric acid	2.718	167.02	[M-H]-	167.021	True	3.48348e+09	3.22387e+09	3.87648e+09	3.56307e+09	4.15707e+09	3.98204e+09	0.223357	0.904432	-0.144916	3.90073e+09	3.05233e+08	1.76226e+08	7.82503	3.52794e+09	3.28572e+08	1.89701e+08	9.3134	0.354471	0.798989	0.798871	0.651	C5H4N4O3	Xanthines	LEHOTFFKMJEONL-UHFFFAOYSA-N	OC=1N=C(O)C=2N=C(O)NC2N1	C00366	---	HMDB0000289	Organoheterocyclic compounds	Imidazopyrimidines	NoSig
POS2543	Dodecanamide	12.431	200.201	[M+H]+	200.201	True	1.30668e+08	1.41916e+08	1.43781e+08	6.8642e+07	7.96112e+07	1.73837e+08	0.403075	1.2927	0.370385	1.07363e+08	5.78284e+07	3.33872e+07	53.8623	1.38788e+08	7.09378e+06	4.0956e+06	5.11122	0.552449	0.57924	0.578701	0.394614	C12H25NO	Fatty Acyls	ILRSCQWREDREME-UHFFFAOYSA-N	CCCCCCCCCCCC(N)=O	C13831	14256	HMDB0251566	Lipids and lipid-like molecules	Fatty Acyls	NoSig
NEG820	Succinic acid	3.288	117.018	[M-H]-	117.019	True	1.17203e+09	1.29628e+09	1.29616e+09	1.74172e+08	2.24629e+08	2.02806e+08	1.78279e-05	6.25735	2.64555	2.00536e+08	2.53053e+07	1.461e+07	12.6188	1.25482e+09	7.16994e+07	4.13957e+07	5.71391	0.000501395	1.36263	1.36267	4.7489	C4H6O4	Dicarboxylic acids and derivatives	KDYFGRWQOYBRFD-UHFFFAOYSA-N	C(CC(=O)O)C(=O)O	C00042	---	HMDB0000254	Organic acids and derivatives	Carboxylic acids and derivatives	UP
POS1833	Uric acid	2.637	169.036	[M+H]+	169.036	True	4.2025e+08	4.96974e+08	4.91314e+08	4.61104e+08	6.54132e+08	6.4029e+08	0.158823	0.802345	-0.317705	5.85175e+08	1.07672e+08	6.21643e+07	18.3999	4.69513e+08	4.27561e+07	2.46853e+07	9.10649	0.276864	0.894516	0.894332	0.799087	C5H4N4O3	Xanthines	LEHOTFFKMJEONL-UHFFFAOYSA-N	O=C1NC2=C(N1)C(=O)NC(=O)N2	C00366	---	HMDB0000289	Organoheterocyclic compounds	Imidazopyrimidines	NoSig
NEG5436	3-(3,5-dihydroxyphenyl)-1-propanoic acid sulphate	7.189	261.007	[M-H]-	261.007	True	1.42441e+07	1.34549e+07	1.26449e+07	1.29414e+07	1.32987e+07	1.26496e+07	0.385838	1.03739	0.0529589	1.29633e+07	325107	187701	2.50791	1.3448e+07	799639	461672	5.94617	0.537621	0.597783	0.597984	0.413595	C9H10O7S	Phenols	IZEZNNYKKNVXNA-UHFFFAOYSA-N	OC1=CC(CCC(=O)OS(O)(=O)=O)=CC(O)=C1	---	131770033	HMDB0061117	Benzenoids	Phenols	NoSig
POS5940	Neoechinulin A	10.335	324.169	[M+H]+	324.171	True	8.47512e+06	9.24848e+06	1.06082e+07	2.2647e+07	2.44466e+07	2.10458e+07	0.000337146	0.415792	-1.26607	2.27131e+07	1.70137e+06	982287	7.49069	9.44393e+06	1.07988e+06	623470	11.4347	0.00257495	1.34696	1.34683	3.47218	C19H21N3O2	Amino acids and derivatives	MYRPIYZIAHOECW-SAIXKJTDSA-N	C[C@@H]1NC(=O)\\C(NC1=O)=C\\C2=C(NC3=CC=CC=C23)C(C)(C)C=C	---	9996305	---	Organic acids and derivatives	Carboxylic acids and derivatives	DOWN
NEG7370	Octadecenedioic acid	12.394	311.223	[M-H]-	311.223	True	5.34802e+07	9.81315e+07	1.26106e+08	4.80302e+07	1.14572e+08	1.15793e+08	0.994502	0.997567	-0.00351381	9.27983e+07	3.87751e+07	2.23868e+07	41.7843	9.25726e+07	3.66306e+07	2.11487e+07	39.5696	0.997043	0.00518287	0.0050115	0.00239413	C18H32O4	Fatty Acyls	YDPSQMGOAILWPE-FYWRMAATSA-N	[H]\C(CCCCCCCCCCCCCCC(O)=O)=C(\[H])C(O)=O	---	6440435	HMDB0304442	Lipids and lipid-like molecules	Fatty Acyls	NoSig
NEG14327	Glutathione (oxidized)	6.596	611.146	[M-H]-	611.145	True	1.52317e+09	1.77279e+09	4.72575e+08	7.73906e+08	7.79696e+08	9.39383e+08	0.3499	1.51165	0.596128	8.30995e+08	9.39115e+07	5.42198e+07	11.3011	1.25618e+09	6.90002e+08	3.98373e+08	54.9287	0.501263	0.63919	0.639179	0.456057	C20H32N6O12S2	Peptides	YPZRWBKMTBYPTK-BJDJZHNGSA-N	O=C(O)CN=C(O)C(N=C(O)CCC(N)C(=O)O)CSSCC(N=C(O)CCC(N)C(=O)O)C(O)=NCC(=O)O	C00127	65359;11215652	HMDB0003337	Organic acids and derivatives	Carboxylic acids and derivatives	NoSig
POS22696	PC(20:5/16:0)	12.446	780.555	[M+H]+	780.554	True	2.9807e+08	2.55446e+08	4.26827e+08	1.33971e+08	1.62634e+08	4.19421e+08	0.446034	1.36915	0.453276	2.38675e+08	1.57185e+08	9.0751e+07	65.8574	3.26781e+08	8.92253e+07	5.15142e+07	27.3043	0.595037	0.532344	0.531802	0.350632	C44H78NO8P	Glycerophospholipids	SUZYROYNFNQALJ-MHEIZRSESA-N	CCCCCCCCCCCCCCCC(=O)O[C@]([H])(COC(=O)CCC\C=C/C\C=C/C\C=C/C\C=C/C\C=C/CC)COP([O-])(=O)OCC[N+](C)(C)C	C00157	52923341	HMDB0008495	Lipids and lipid-like molecules	Glycerophospholipids	NoSig
POS398	Choline	2.09	104.107	[M]+	104.107	True	9.48905e+08	3.95097e+08	1.84096e+08	6.28483e+08	1.16457e+08	2.73424e+08	0.568443	1.50054	0.585485	3.39454e+08	2.62322e+08	1.51452e+08	77.2775	5.09366e+08	3.95002e+08	2.28054e+08	77.5477	0.705709	0.405594	0.405268	0.245313	C5H14NO+	Cholines	OEYIOHPDSNJKLS-UHFFFAOYSA-N	OCC[N+1](C)(C)C	C00114	305	HMDB0000097	Organic nitrogen compounds	Organonitrogen compounds	NoSig
POS3208	Carnosine	1.282	227.114	[M+H]+	227.114	True	1.33887e+08	1.3036e+08	1.4606e+08	1.81334e+08	1.85181e+08	1.98676e+08	0.00188979	0.725963	-0.462032	1.88397e+08	9.1071e+06	5.25799e+06	4.834	1.36769e+08	8.23721e+06	4.75576e+06	6.02271	0.00849014	1.31843	1.31856	2.72359	C9H14N4O3	Hybrid peptides	CQOVPNPJLQNMDC-ZETCQYMHSA-N	O=C(O)C(N=C(O)CCN)CC1=CN=CN1	C00386	439224	HMDB0000033	Organic acids and derivatives	Peptidomimetics	DOWN
POS4194	6,10,14-Trimethyl-5,9,13-pentadecatrien-2-one	12.136	263.237	[2M+H]+	263.237	True	696509	3309.03	1.91947e+06	6.69364e+07	6.68896e+07	7.00195e+07	5.68424e-07	0.0128494	-6.28216	6.79485e+07	1.7937e+06	1.03559e+06	2.6398	873095	970207	560149	111.123	0.00010168	1.36652	1.36654	6.24533	C18H30O	Prenol lipids	LTUMRKDLVGQMJU-HSVQFRAPSA-N	CC(C)=CCC\C(C)=C/CC\C(C)=C\CCC(C)=O	---	1711944	HMDB0034495	Lipids and lipid-like molecules	Prenol lipids	DOWN
NEG5015	Bisphenol S	9.344	249.023	[M-H]-	249.023	True	922014	1.22088e+06	1.13745e+06	1.31192e+06	1.04802e+06	880349	0.935063	1.01236	0.0177247	1.08009e+06	217564	125611	20.1431	1.09345e+06	154214	89035.5	14.1035	0.974954	0.0589104	0.0592332	0.0291593	C12H10O4S	Benzenesulfonyl compounds	VPWNQTHUCYMVMZ-UHFFFAOYSA-N	OC1=CC=C(C=C1)S(=O)(=O)C1=CC=C(O)C=C1	C14216	6626	HMDB0240712	Benzenoids	Benzene and substituted derivatives	NoSig
POS22162	PC(16:0/18:1)	12.358	760.585	[M+H]+	760.585	True	4.76669e+09	3.39145e+09	2.69383e+09	1.12461e+09	8.77185e+08	8.73555e+08	0.0123861	3.77414	1.91615	9.58449e+08	1.43908e+08	8.30853e+07	15.0147	3.61732e+09	1.05473e+09	6.08947e+08	29.1577	0.0360377	1.24124	1.24117	1.90706	C42H82NO8P	Phosphatidylcholines	WTJKGGKOPKCXLL-VYOBOKEXSA-N	CCCCCCCCCCCCCCCC(=O)OC[C@H](COP(=O)([O-])OCC[N+](C)(C)C)OC(=O)CCCCCCC/C=C\CCCCCCCC	---	5497103	HMDB0007972	Lipids and lipid-like molecules	Glycerophospholipids	UP
NEG7081	Eicosatetraenoic acid	11.723	303.232	[M-H]-	303.233	True	3309.03	4.58247e+08	1.26211e+08	3309.03	9.73345e+07	5.58493e+08	0.919049	0.891177	-0.166217	2.1861e+08	2.98343e+08	1.72248e+08	136.473	1.9482e+08	2.36701e+08	1.36659e+08	121.497	0.96154	0.0735751	0.0738654	0.0366611	C20H32O2	Fatty Acyls	IQLUYYHUNSSHIY-UHFFFAOYSA-N	CCCCCCCCCCCC=CC=CC=CC=CC(O)=O	---	53436588	HMDB0002177	Lipids and lipid-like molecules	Fatty Acyls	NoSig
NEG15654	FAD	7.011	784.15	[M-H]-	784.15	True	2.1442e+07	2.03939e+07	1.88324e+07	1.59997e+07	1.71286e+07	1.83953e+07	0.0411564	1.17749	0.235709	1.71746e+07	1.19845e+06	691926	6.97806	2.02228e+07	1.31319e+06	758172	6.49363	0.0921118	1.13432	1.13416	1.38556	C27H33N9O15P2	Flavin nucleotides	VWWQXMAJTJZDQX-HOMBZVRDSA-N	Cc1cc2nc3c(O)nc(=O)nc-3n(CC(O)C(O)C(O)COP(=O)(O)OP(=O)(O)OCC3OC(n4cnc5c(N)ncnc54)C(O)C3O)c2cc1C	C00016	24868262	HMDB0001248	Nucleosides, nucleotides, and analogues	Flavin nucleotides	UP
POS23816	PC(18:0/20:4)	11.677	810.599	[M+H]+	810.601	True	4.76897e+07	4.38811e+07	7.52333e+07	9.44164e+07	5.57245e+07	3.44995e+07	0.782418	0.903399	-0.146564	6.15468e+07	3.03798e+07	1.75398e+07	49.3606	5.56013e+07	1.71081e+07	9.87735e+06	30.7692	0.869986	0.199898	0.199766	0.106561	C46H84NO8P	Phosphatidylcholines	PSVRFUPOQYJOOZ-QNPWAGBNSA-N	CCCCCCCCCCCCCCCCCC(=O)OC[C@H](COP(=O)([O-])OCC[N+](C)(C)C)OC(=O)CCC/C=C\C/C=C\C/C=C\C/C=C\CCCCC	---	16219824	HMDB0008048	Lipids and lipid-like molecules	Glycerophospholipids	NoSig
POS5245	Sphingosine	11.046	300.289	[M+H]+	300.29	True	2.41062e+09	2.62604e+09	2.85955e+09	8.09568e+08	7.79118e+08	8.83568e+08	0.000170983	3.19393	1.67533	8.24084e+08	5.37168e+07	3.10134e+07	6.51836	2.63207e+09	2.24524e+08	1.29629e+08	8.53032	0.00175831	1.35277	1.35276	3.76705	C18H37NO2	Alkanolamines	WWUZIQQURGPMPG-UHFFFAOYSA-N	CCCCCCCCCCCCC/C=C/[C@H]([C@H](CO)N)O	C00319	5280335	HMDB0000252	Organic nitrogen compounds	Organonitrogen compounds	UP
NEG2817	Azelaic acid	9.085	187.097	[M-H]-	187.098	True	2.45659e+08	2.52769e+08	2.5252e+08	8.56345e+08	833616606	8.3503e+08	1.7337e-07	0.297406	-1.74949	8.41664e+08	1.27338e+07	7.35185e+06	1.51293	2.50316e+08	4.03484e+06	2.32951e+06	1.6119	5.29645e-05	1.36691	1.36692	6.76103	C9H16O4	Medium-chain fatty acids	BDJRBEYXGGNYIS-UHFFFAOYSA-N	C(CCCC(=O)O)CCCC(=O)O	C08261	2266	HMDB0000784	Lipids and lipid-like molecules	Fatty Acyls	DOWN
POS4607	4,8,12,15-Octadecatetraenoic acid	11.542	277.215	[M+H]+	277.217	True	1.10121e+07	1.04297e+07	1.29697e+07	1.99812e+07	4.95735e+06	5.38761e+06	0.798721	1.13471	0.182327	1.01087e+07	8.55252e+06	4.9378e+06	84.6054	1.14705e+07	1.33062e+06	768235	11.6004	0.879869	0.184754	0.184605	0.0976048	C18H28O2	Fatty Acyls	SIVLURJESSFFDP-FLVFHSTKSA-N	CC\C=C/C\C=C/CC\C=C\CC\C=C\CCC(O)=O	---	131751278	HMDB0032672	Lipids and lipid-like molecules	Fatty Acyls	NoSig
NEG902	3-(2-Furanyl)-2-propenal	7.896	121.028	[M-H]-	121.029	True	2.94928e+08	2.32762e+08	2.46794e+08	2.59361e+08	2.89154e+08	2.86907e+08	0.390657	0.927058	-0.109269	2.78474e+08	1.65904e+07	9.5785e+06	5.95763	2.58161e+08	3.2605e+07	1.88245e+07	12.6297	0.541865	0.592438	0.592563	0.408204	C7H6O2	Heteroaromatic compounds	VZIRCHXYMBFNFD-IWQZZHSRSA-N	O=C\C=C/C1=CC=CO1	---	1715056	HMDB0032918	Organoheterocyclic compounds	Heteroaromatic compounds	NoSig
NEG8842	Prostaglandin E2	10.397	351.217	[M-H]-	351.218	True	5.7939e+08	5.22889e+08	4.25171e+08	4.5118e+08	5.36376e+08	5.9853e+08	0.768602	0.963031	-0.0543458	5.28695e+08	7.39745e+07	4.27092e+07	13.9919	5.0915e+08	7.80221e+07	4.50461e+07	15.324	0.857746	0.212435	0.212654	0.114299	C20H32O5	Prostaglandins and related compounds	XEYBRNLFEZDVAW-ARSRFYASSA-N	CCCCCC(O)C=CC1C(O)CC(=O)C1CC=CCCCC(=O)O	C00584	5280360	HMDB0001220	Lipids and lipid-like molecules	Fatty Acyls	NoSig
POS5405	2,6,10,14-Hexadecatetraenoic acid, 3,7,11,15-tetramethyl-, (Z,E,E)-	11.805	305.247	[M+NH4]+	305.248	True	672159	2.53909e+09	3.2433e+09	3309.03	4.23425e+09	3.83187e+09	0.67233	0.716956	-0.480043	2.68871e+09	2.33716e+09	1.34936e+09	86.9251	1.92769e+09	1.70558e+09	9.84719e+08	88.4783	0.780235	0.303946	0.303693	0.172417	C20H32O2	Prenol lipids	SZNLKILVMCHHSD-UHFFFAOYSA-N	CC(C)=CCCC(C)=CCCC(C)=CCCC(C)=CC(O)=O	---	128570	HMDB0245522	Lipids and lipid-like molecules	Prenol lipids	NoSig
POS8236	S-Adenosylmethionine	1.392	399.144	[M+H]+	399.144	True	1.26061e+08	8.41523e+07	8.43849e+07	4.95825e+07	5.16569e+07	4.35902e+07	0.0242129	2.0341	1.02439	4.82765e+07	4.18895e+06	2.41849e+06	8.67699	9.81992e+07	2.41289e+07	1.39308e+07	24.5713	0.0617714	1.18981	1.18977	1.61595	C15H22N6O5S	5'-deoxy-5'-thionucleosides	MEFKEPWMEQBLKI-AIRLBKTGSA-N	O=C([O-])C(N)CC[S+](C)CC1OC(N2C=NC=3C(=NC=NC32)N)C(O)C1O	C00019	34755	HMDB0001185	Nucleosides, nucleotides, and analogues	5'-deoxyribonucleosides	UP
POS9968	-Eicosadienoylcarnitine	11.746	452.373	[M+H]+	452.374	True	4.75539e+07	3.46711e+07	4.49692e+07	2.12756e+07	2.34874e+07	2.85382e+07	0.0160405	1.73523	0.795125	2.44337e+07	3.72261e+06	2.14925e+06	15.2355	4.23981e+07	6.8154e+06	3.93487e+06	16.0748	0.0447441	1.22364	1.22343	1.79478	C27H49NO4	Fatty Acyls	OLZWDVKTOGTVLC-UTJQPWESSA-N	[H]\C(CCCCC)=C(/[H])C\C([H])=C(\[H])CCCCCCCCCC(=O)OC(CC([O-])=O)C[N+](C)(C)C	---	71464509	HMDB0240747	Lipids and lipid-like molecules	Fatty Acyls	UP
NEG13774	UDP-glucose	1.368	565.049	[M-H]-	565.048	True	2.05873e+07	2.1346e+07	2.30426e+07	424578	1.06663e+06	1.06117e+06	1.03896e-05	25.457	4.66999	850794	369124	213114	43.3858	2.16586e+07	1.25718e+06	725833	5.80452	0.000365737	1.36378	1.36378	4.9834	C15H24N2O17P2	Pyrimidine nucleotide sugars	HSCJRCZFDFQWRP-JZMIEXBBSA-N	OC[C@@H](O1)[C@@H](O)[C@H](O)[C@@H](O)C1OP(O)(=O)OP(O)(=O)OC[C@@H](O2)[C@@H](O)[C@@H](O)[C@@H]2N(C=3)C(=O)NC(=O)C3	C00029	53477679	HMDB0000286	Nucleosides, nucleotides, and analogues	Pyrimidine nucleotides	UP
POS21375	PC(16:0/16:0)	12.451	734.569	[M+H]+	734.569	True	3.75244e+07	3.26259e+07	4.34785e+07	3.26565e+07	2.69716e+07	2.18653e+07	0.0726003	1.39433	0.479574	2.71644e+07	5.39818e+06	3.11664e+06	19.8722	3.78763e+07	5.43484e+06	3.1378e+06	14.3489	0.145439	1.05431	1.05438	1.13906	C40H80NO8P	Phosphatidylcholines	KILNVBDSWZSGLL-KXQOOQHDSA-N	CCCCCCCCCCCCCCCC(=O)OC[C@H](COP(=O)([O-])OCC[N+](C)(C)C)OC(=O)CCCCCCCCCCCCCCC	---	452110	HMDB0000564	Lipids and lipid-like molecules	Glycerophospholipids	NoSig
NEG5652	Inosine	6.681	267.073	[M-H]-	267.074	True	9.24453e+09	8.80574e+09	7.96543e+09	2.19099e+09	5.58472e+09	5.99765e+09	0.0319451	1.88884	0.917501	4.59112e+09	2.0888e+09	1.20597e+09	45.4965	8.6719e+09	6.49969e+08	3.7526e+08	7.49513	0.0755066	1.16265	1.16266	1.4956	C10H12N4O5	Purine nucleosides	UGQMRVRMYYASKQ-KQYNXXCUSA-N	OC[C@@H](O1)[C@@H](O)[C@@H](O)[C@@H]1n(c3)c(N=2)c(n3)C(=O)NC2	C00294	135398641	HMDB0000195	Nucleosides, nucleotides, and analogues	Purine nucleosides	UP
POS11459	LPC(16:0)	12.457	496.34	[M+CH3OH+H]+	496.34	True	1.6394e+09	2.03987e+09	1.53823e+09	8.41043e+08	7.81525e+08	9.13126e+08	0.00478966	2.05762	1.04098	8.45231e+08	6.59007e+07	3.80478e+07	7.79676	1.73917e+09	2.65286e+08	1.53163e+08	15.2536	0.0168673	1.28937	1.28937	2.3197	C24H50NO7P	Glycerophospholipids	NEGQHKSYEYVFTD-HSZRJFAPSA-N	CCCCCCCCCCCCCCCC(=O)O[C@H](CO)COP([O-])(=O)OCC[N+](C)(C)C	---	15061532	HMDB0240262	Lipids and lipid-like molecules	Glycerophospholipids	UP
POS1459	Guanine	6.73	152.057	[M+H]+	152.057	True	9.87161e+08	1.17131e+09	1.11886e+09	4.15304e+08	4.4128e+08	4.13555e+08	0.000271582	2.58029	1.36753	4.2338e+08	1.55269e+07	8.96445e+06	3.66736	1.09244e+09	9.48731e+07	5.4775e+07	8.68448	0.00222485	1.34888	1.34894	3.5661	C5H5N5O	Purines and purine derivatives	UYTPUPDQBNUYGX-UHFFFAOYSA-N	C1=NC2=C(N1)C(=O)NC(=N2)N	C00242	135398634	HMDB0000132	Organoheterocyclic compounds	Imidazopyrimidines	UP
POS4568	3-Hydroxyhexanoylcarnitine	7.092	276.181	[M+H]+	276.181	True	3.31194e+07	3.90746e+07	3.54227e+07	1.92338e+07	1.86095e+07	2.00273e+07	0.000741604	1.85961	0.895001	1.92902e+07	710587	410258	3.68367	3.58722e+07	3.00297e+06	1.73376e+06	8.37128	0.00433608	1.33685	1.33686	3.12983	C13H25NO5	Fatty Acyls	VYEONLJQPYRKAN-WDEREUQCSA-N	CCC[C@H](O)CC(=O)O[C@H](CC([O-])=O)C[N+](C)(C)C	---	156908002	HMDB0013131	Lipids and lipid-like molecules	Fatty Acyls	UP
POS99	Tetrahydropyridine	1.127	84.0814	[M+H]+	84.0808	True	4.97441e+08	5.08828e+08	5.97085e+08	5.41064e+08	5.93805e+08	5.40255e+08	0.544094	0.957156	-0.0631738	5.58375e+08	3.06862e+07	1.77167e+07	5.49563	5.34452e+08	5.45404e+07	3.14889e+07	10.2049	0.683333	0.430118	0.429748	0.264326	C5H9N	Pyridines and derivatives	VSWICNJIUPRZIK-UHFFFAOYSA-N	C1CNC=CC1	---	10176084	HMDB0244121	Organoheterocyclic compounds	Pyridines and derivatives	NoSig
NEG7449	9,10-Epoxyoctadecanoic acid	11.878	313.239	[M-H]-	313.238	True	1.22428e+08	2.31707e+08	1.2217e+08	2.57405e+08	2.52414e+08	2.85505e+08	0.0485083	0.598881	-0.739658	2.65108e+08	1.78398e+07	1.02998e+07	6.72924	1.58768e+08	6.31665e+07	3.64692e+07	39.7853	0.106041	1.11352	1.1135	1.31418	C18H34O4	Fatty Acyls	ITTPZDMHCNGAGQ-DLBZAZTESA-N	OCCCCCCCC[C@@H]1O[C@@H]1CCCCCCCC(O)=O	C19418	16061045	HMDB0061650	Lipids and lipid-like molecules	Fatty Acyls	DOWN
POS21320	PC(18:1/14:0)	12.45	732.553	[M+H]+	732.554	True	3.75311e+07	4.85248e+07	2.66795e+07	8.28852e+07	1.42164e+07	2.21049e+07	0.92853	0.945716	-0.0805216	3.97355e+07	3.75763e+07	2.16947e+07	94.5661	3.75785e+07	1.09227e+07	6.30624e+06	29.0664	0.96897	0.0650471	0.0652005	0.032204	C40H78NO8P	Phosphatidylcholines	KIVAJCJTVPWSRJ-OQHNRNOKSA-N	CCCCCCCCCCCCCC(=O)O[C@H](COC(=O)CCCCCCC/C=C\CCCCCCCC)COP(=O)([O-])OCC[N+](C)(C)C	---	24778931	HMDB0008097	Lipids and lipid-like molecules	Glycerophospholipids	NoSig
POS5345	8-HETE	12.613	303.231	[M+H-H2O]+	303.231	True	8.94152e+07	1.09091e+08	8.67125e+07	1.97663e+08	2.24192e+08	2.33334e+08	0.000651484	0.435322	-1.19984	2.18397e+08	1.85281e+07	1.06972e+07	8.48368	9.50729e+07	1.2215e+07	7.05233e+06	12.848	0.00393417	1.33879	1.33879	3.1861	C20H32O3	Hydroxyeicosatetraenoic acids	NLUNAYAEIJYXRB-HEJOTXCHSA-N	CCCCC/C=C\C/C=C\C=C\[C@H](C/C=C\CCCC(=O)O)O	C14776	5283154	HMDB0004679	Lipids and lipid-like molecules	Fatty Acyls	DOWN
POS5276	8-HEPE	12.391	301.215	[M+H-H2O]+	301.215	True	4.84202e+07	5.46778e+07	4.94255e+07	1.16041e+08	1.20901e+08	1.36393e+08	0.000333526	0.408543	-1.29144	1.24445e+08	1.06285e+07	6.13635e+06	8.5407	5.08412e+07	3.36041e+06	1.94013e+06	6.60962	0.00256333	1.34687	1.34694	3.47687	C20H30O3	Very long-chain fatty acids	WLOUCHKFBGGNEB-GXIKJMEPSA-N	CC/C=C\C/C=C\C/C=C\C=C\C(C/C=C\CCCC(=O)O)O	---	16061128	HMDB0242271	Lipids and lipid-like molecules	Fatty Acyls	DOWN
POS1391	5-Hydroxy-4-oxo-L-norvaline	1.796	148.06	[M+H]+	148.06	True	8.5162e+08	2.78872e+08	4.58948e+08	7.55153e+08	9.89671e+08	1.24878e+09	0.101766	0.530945	-0.913365	9.97868e+08	2.46916e+08	1.42557e+08	24.7444	5.29814e+08	2.92877e+08	1.69092e+08	55.2792	0.193402	0.99352	0.993806	0.992399	C5H9NO4	Carboxylic acids and derivatives	FRTKOPTWTJLHNO-UHFFFAOYSA-N	NC(CC(=O)CO)C(O)=O	---	10219513	HMDB0246802	Organic acids and derivatives	Carboxylic acids and derivatives	NoSig
POS2422	(1S,2S,6R,7R,9R)-6-methyl-10,12-dioxatricyclo[7.2.1.0<2,7>]dodec-4-en-8-one	12.26	195.101	[M+H]+	195.102	True	1.09484e+08	1.05541e+08	9.38048e+07	1.23378e+08	1.01771e+08	1.15217e+08	0.252315	0.907348	-0.140272	1.13455e+08	1.09104e+07	6.29912e+06	9.61648	1.02943e+08	8.15611e+06	4.70893e+06	7.92291	0.385893	0.759341	0.75977	0.598057	C11H14O3	Oxepanes	AQERSWBBCICMMF-UEWQFTGXSA-N	CC1C=CCC2C3COC(O3)C(=O)C12	---	11878636	---	Organoheterocyclic compounds	Oxepanes	NoSig
NEG1954	5-Dihydroxyhept-6-enoic acid	7.745	159.065	[M-H]-	159.066	True	3.20992e+07	3.64984e+07	3.10154e+07	4.53785e+07	5.23371e+07	5.29619e+07	0.00449237	0.661101	-0.597058	5.02259e+07	4.20952e+06	2.43037e+06	8.38118	3.32043e+07	2.90379e+06	1.6765e+06	8.74522	0.0162899	1.29191	1.29185	2.34752	C7H12O4	Fatty Acyls	VDXAJPMEBTVBFW-UHFFFAOYSA-N	OC(=O)CCCC(O)(O)C=C	---	57016125	HMDB0246781	Lipids and lipid-like molecules	Fatty Acyls	DOWN
NEG1547	2,2-Dimethylsuccinic acid	7.151	145.049	[M-H]-	145.05	True	1.10887e+08	1.05134e+08	1.21308e+08	1.30682e+08	1.52174e+08	1.37402e+08	0.0250995	0.802671	-0.31712	1.40086e+08	1.09947e+07	6.3478e+06	7.84853	1.12443e+08	8.19859e+06	4.73346e+06	7.29132	0.0633711	1.18669	1.18647	1.60033	C6H10O4	Fatty Acyls	GOHPTLYPQCTZSE-UHFFFAOYSA-N	CC(C)(CC(O)=O)C(O)=O	---	11701	HMDB0002074	Lipids and lipid-like molecules	Fatty Acyls	DOWN
POS795	2-Hydroxy-4-imino-2,5-cyclohexadienone	6.614	124.04	[M+H]+	124.04	True	3.64106e+07	4.94401e+07	3.50447e+07	3.36825e+07	5.18389e+07	8.72571e+07	0.350764	0.699713	-0.515164	5.75928e+07	2.72468e+07	1.5731e+07	47.3095	4.02985e+07	7.94629e+06	4.58779e+06	19.7186	0.501913	0.637836	0.638171	0.454985	C6H5NO2	Organonitrogen compounds	FYWMPJHTFWPBOS-UHFFFAOYSA-N	OC1=CC(=N)C=CC1=O	---	---	HMDB0031713	Organic nitrogen compounds	Organonitrogen compounds	NoSig
POS77	4-Methylimidazole	12.56	83.061	[M+H]+	83.0604	True	1.13569e+09	2.16072e+09	1.14664e+09	1.01194e+09	1.17471e+09	4.10662e+09	0.592373	0.706002	-0.502255	2.09776e+09	1.74163e+09	1.00553e+09	83.0235	1.48102e+09	5.88666e+08	3.39867e+08	39.7474	0.722435	0.380969	0.381486	0.227405	C4H6N2	Azoles	XLSZMDLNRCVEIJ-UHFFFAOYSA-N	CC1=CN=CN1	C19262	13195	HMDB0246511	Organoheterocyclic compounds	Azoles	NoSig
NEG2752	6-Methyl-2-methylene-6-octene-1,3,8-triol	10.93	185.117	[M-H]-	185.118	True	1.4731e+07	1.23169e+07	1.86935e+07	1.15563e+07	1.3607e+07	1.60663e+07	0.543927	1.10943	0.149819	13743207	2.25807e+06	1.3037e+06	16.4304	1.52471e+07	3.21946e+06	1.85876e+06	21.1152	0.683333	0.430213	0.429917	0.264459	C10H18O3	Fatty Acyls	KSMRZTSAPKWVGY-YVMONPNESA-N	C\C(CCC(O)C(=C)CO)=C\CO	---	131752432	HMDB0038692	Lipids and lipid-like molecules	Fatty Acyls	NoSig
POS22737	PC(18:2/18:2)	13.47	782.57	[M+H]+	782.569	True	2.69354e+08	4.55447e+08	2.68431e+08	2.84351e+08	2.11836e+08	4.92e+08	0.987927	1.00511	0.00734758	3.29396e+08	1.45412e+08	8.39538e+07	44.1452	3.31077e+08	1.07709e+08	6.21856e+07	32.5327	0.996634	0.0114919	0.0110058	0.00527513	C44H80NO8P	Phosphatidylcholines	FVXDQWZBHIXIEJ-LNDKUQBDSA-N	CCCCC/C=C\C/C=C\CCCCCCCC(=O)OC[C@H](COP(=O)([O-])OCC[N+](C)(C)C)OC(=O)CCCCCCC/C=C\C/C=C\CCCCC	---	5288075	HMDB0008138	Lipids and lipid-like molecules	Glycerophospholipids	NoSig
POS10964	LPE(18:1)	12.708	480.308	[M+H]+	480.308	True	4.31402e+08	5.64257e+08	5.07589e+08	1.93686e+08	2.08125e+08	2.34656e+08	0.00200698	2.36186	1.23993	2.12156e+08	2.07802e+07	1.19975e+07	9.7948	5.01083e+08	6.6666e+07	3.84896e+07	13.3044	0.00887303	1.31702	1.31706	2.69746	C23H46NO7P	Lysophosphatidylethanolamines	PYVRVRFVLRNJLY-MZMPXXGTSA-N	CCCCCCCC/C=C\CCCCCCCC(=O)OC[C@H](COP(=O)(O)OCCN)O	---	9547071	HMDB0011506	Lipids and lipid-like molecules	Glycerophospholipids	UP
NEG5820	7(14)-Bisabolene-2,3,10,11-tetrol	11.823	271.192	[M-H]-	271.191	True	3.55556e+07	4.21866e+07	3.68906e+07	3.6397e+07	3.68999e+07	3.72531e+07	0.541216	1.03693	0.05232	3.685e+07	430217	248386	1.16748	3.82109e+07	3.50713e+06	2.02484e+06	9.17835	0.68158	0.432443	0.432661	0.266629	C15H28O4	Prenol lipids	DIVJRNQAZRYCIO-UHFFFAOYSA-N	CC(C)(O)C(O)CCC(=C)C1CCC(C)(O)C(O)C1	---	73816843	HMDB0035918	Lipids and lipid-like molecules	Prenol lipids	NoSig
NEG2344	N-Acetylisoleucine	8.345	172.097	[M-H]-	172.097	True	5.03987e+07	5.10102e+07	5.20237e+07	3.65855e+07	3.589e+07	3.91413e+07	0.000220348	1.37464	0.459052	3.72056e+07	1.71209e+06	988475	4.6017	5.11442e+07	820741	473855	1.60476	0.00203955	1.35088	1.35078	3.65689	C8H15NO3	Carboxylic acids and derivatives	JDTWZSUNGHMMJM-FSPLSTOPSA-N	CC[C@H](C)[C@H](NC(C)=O)C(O)=O	---	7036275	HMDB0061684	Organic acids and derivatives	Carboxylic acids and derivatives	UP
POS109	Furanone A	2.506	85.0291	[2M+H]+	85.0289	True	2.26726e+08	3.72471e+08	2.72811e+08	2.6431e+08	2.77222e+08	1.95944e+08	0.419268	1.18242	0.241747	2.45825e+08	4.36783e+07	2.52177e+07	17.768	2.90669e+08	7.44955e+07	4.301e+07	25.629	0.568011	0.560284	0.560838	0.377508	C4H4O2	Dihydrofurans	RHDGNLCLDBVESU-UHFFFAOYSA-N	O=C1CC=CO1	C17602	140765	HMDB0094691	Organoheterocyclic compounds	Dihydrofurans	NoSig
NEG4202	N,N,N-Trimethyl-L-alanyl-L-proline betaine	6.967	227.14	[M-H]-	227.14	True	6.42677e+07	5.57135e+07	5.54793e+07	1.88405e+07	2.40719e+07	2.33026e+07	0.000392282	2.64986	1.40592	2.20717e+07	2.8246e+06	1.63078e+06	12.7974	5.84868e+07	5.00776e+06	2.89123e+06	8.56221	0.00281981	1.34522	1.34521	3.4064	C11H20N2O3	Carboxylic acids and derivatives	KXONJPJIFNGMCN-IUCAKERBSA-N	C[C@@H](C(=O)N1CCC[C@H]1C([O-])=O)[N+](C)(C)C	---	134218393	HMDB0240365	Organic acids and derivatives	Carboxylic acids and derivatives	UP
NEG9864	Succinoadenosine	6.799	382.1	[M-H]-	382.1	True	1.57478e+07	1.49862e+07	1.28182e+07	8.57975e+06	9.21237e+06	8.90852e+06	0.00330925	1.63113	0.705869	8.90022e+06	316392	182669	3.55488	1.45174e+07	1.52003e+06	877588	10.4704	0.0128378	1.30262	1.30264	2.48027	C14H17N5O8	Purine nucleosides	VKGZCEJTCKHMRL-MDBUBQOGSA-N	O=C(O)CC(NC1=NC=NC2=C1N=CN2C3OC(CO)C(O)C3O)C(=O)O	---	165243	HMDB0000912	Nucleosides, nucleotides, and analogues	Purine nucleosides	UP
NEG11044	ADP	2.035	426.022	[M-H]-	426.022	True	3.27838e+07	2.94376e+07	1.78743e+07	1.67916e+07	3.17803e+07	5.08154e+07	0.58467	0.805895	-0.311336	3.31291e+07	1.7052e+07	9.84496e+06	51.4713	2.66986e+07	7.82308e+06	4.51666e+06	29.3015	0.716616	0.388774	0.389113	0.233089	C10H15N5O10P2	Purine ribonucleoside diphosphates	XTWYTFMLZFPYCI-KQYNXXCUSA-N	C1=NC(=C2C(=N1)N(C=N2)[C@H]3[C@@H]([C@@H]([C@H](O3)COP(=O)(O)OP(=O)(O)O)O)O)N	C00008	6022	HMDB0001341	Nucleosides, nucleotides, and analogues	Purine nucleotides	NoSig
POS1525	6-n-Propyluracil	6.81	155.081	[M+CH3OH+H]+	155.082	True	2.0153e+07	2.16249e+07	3.01063e+07	2.10169e+07	3.25641e+07	1.94194e+07	0.946122	0.984709	-0.0222302	2.43335e+07	7.17251e+06	4.14105e+06	29.4759	2.39614e+07	5.3723e+06	3.1017e+06	22.4206	0.980075	0.0497999	0.0491356	0.0240528	C7H10N2O2	Diazines	IMUTYIOWQFQGIC-UHFFFAOYSA-N	CCCC1=CC(=O)NC(=O)N1	---	96188	HMDB0247095	Organoheterocyclic compounds	Diazines	NoSig
NEG3364	N-Lactoylleucine	8.448	202.107	[M-H]-	202.108	True	2.73324e+07	2.69761e+07	2.75805e+07	2.98665e+07	2.95151e+07	3.48698e+07	0.0767573	0.868837	-0.202843	3.14171e+07	2.99522e+06	1.72929e+06	9.53373	2.72964e+07	303793	175395	1.11294	0.151286	1.04469	1.04515	1.11488	C9H17NO4	Carboxylic acids and derivatives	BUMIGZVUJKNXCO-BQBZGAKWSA-N	CC(C)C[C@H](NC(=O)[C@H](C)O)C(O)=O	---	57329455	HMDB0062176	Organic acids and derivatives	Carboxylic acids and derivatives	NoSig
POS1597	2,2,6,6-Tetramethylpiperidin-1-ol	1.659	158.154	[M+H]+	158.154	True	5.6014e+08	1.77957e+08	3.79869e+08	3.85542e+08	6.10699e+08	6.93528e+08	0.255401	0.661609	-0.59595	5.63256e+08	1.5938e+08	9.20181e+07	28.2962	3.72655e+08	1.91193e+08	1.10386e+08	51.3057	0.390125	0.755482	0.75571	0.592777	C9H19NO	Piperidines	VUZNLSBZRVZGIK-UHFFFAOYSA-N	CC1(C)CCCC(C)(C)N1O	---	549976	HMDB0245345	Organoheterocyclic compounds	Piperidines	NoSig
POS1782	Phenylalanine	6.915	166.086	[M+H]+	166.086	True	4.48343e+10	4.37362e+10	4.69871e+10	4.03525e+10	4.27178e+10	4.47735e+10	0.182168	1.06034	0.0845241	4.26146e+10	2.21228e+09	1.27726e+09	5.19138	4.51859e+10	1.65373e+09	9.54781e+08	3.65984	0.306202	0.858452	0.858218	0.739528	C9H11NO2	Amino acids and derivatives	COLNVLDHVKWLRT-UHFFFAOYSA-N	N[C@@H](CC1=CC=CC=C1)C(O)=O	C00079	6140	HMDB0000159	Organic acids and derivatives	Carboxylic acids and derivatives	NoSig
POS1369	1H-Indene-1,2(3H)-dione	4.518	147.044	[2M+H]+	147.044	True	7.36599e+08	6.17312e+08	4.14759e+08	8.46585e+08	8.65217e+08	8.79852e+08	0.0438933	0.682448	-0.551208	8.63884e+08	1.66735e+07	9.62645e+06	1.93006	5.89556e+08	1.62705e+08	9.3938e+07	27.5979	0.0968189	1.12623	1.12628	1.3576	C9H6O2	Indanes	WFFZGYRTVIPBFN-UHFFFAOYSA-N	O=C1CC2=CC=CC=C2C1=O	---	123358	HMDB0244733	Benzenoids	Indanes	DOWN
POS698	N-Methyl-a-aminoisobutyric acid	2.945	118.087	[M+CH3OH+H]+	118.087	True	6.08463e+08	3.12881e+08	3.30669e+08	4.83676e+08	3.52458e+08	4.2515e+08	0.97749	0.992649	-0.010644	4.20428e+08	6.57365e+07	3.7953e+07	15.6356	4.17338e+08	1.65759e+08	9.57008e+07	39.7181	0.993815	0.0201036	0.0205209	0.00988746	C5H11NO2	Carboxylic acids and derivatives	DLAMVQGYEVKIRE-UHFFFAOYSA-N	CNC(C)(C)C(O)=O	---	75725;6951124	HMDB0002141	Organic acids and derivatives	Carboxylic acids and derivatives	NoSig
NEG1624	Citramalic acid	3.5	147.029	[M-H]-	147.03	True	27831083	3.61774e+07	3.5662e+07	1.23354e+07	4.4865e+07	4.00231e+07	0.941739	1.02517	0.0358605	3.24078e+07	1.7551e+07	1.01331e+07	54.1567	3.32235e+07	4.67705e+06	2.7003e+06	14.0775	0.977745	0.0528533	0.0531366	0.0260693	C5H8O5	Fatty Acyls	XFTRTWQBIOMVPK-PYKBPPSDNA-N	O=C(O)CC(O)(C(=O)O)C	C02612	1081	HMDB0000426	Lipids and lipid-like molecules	Fatty Acyls	NoSig
POS8217	Trans-Hexadec-2-Enoyl Carnitine	11.243	398.326	[M+H]+	398.327	True	1.5163e+08	1.62261e+08	133686405	1.1428e+08	1.45616e+08	1.13403e+08	0.140175	1.19898	0.261805	1.24433e+08	1.83501e+07	1.05945e+07	14.747	1.49193e+08	1.44425e+07	8.33837e+06	9.68043	0.250795	0.924305	0.924826	0.853331	C23H43NO4	Fatty Acyls	SOYNLLDADLOGAM-ISLYRVAYSA-N	CCCCCCCCCCCCC\C=C\C(=O)OC(CC([O-])=O)C[N+](C)(C)C	---	53477817	HMDB0006317	Lipids and lipid-like molecules	Fatty Acyls	NoSig
POS22831	PC(18:0/18:2)	11.951	786.599	[M+H]+	786.601	True	8.37957e+08	4.4751e+08	4.65892e+08	4.28938e+08	3.88274e+08	4.63574e+08	0.290994	1.36741	0.451447	4.26928e+08	3.769e+07	2.17603e+07	8.82817	5.83787e+08	2.2031e+08	1.27196e+08	37.7381	0.433652	0.710487	0.710178	0.536116	C44H84NO8P	Phosphatidylcholines	FORFDCPQKJHEBF-VPUSDGANSA-N	CCCCCCCCCCCCCCCCCC(=O)OC[C@H](COP(=O)([O-])OCC[N+](C)(C)C)OC(=O)CCCCCCC/C=C\C/C=C\CCCCC	---	6441487	HMDB0008039	Lipids and lipid-like molecules	Glycerophospholipids	NoSig
POS2973	Propionylcarnitine	6.715	218.139	[M+H]+	218.139	True	7.02746e+08	7.77035e+08	9.41765e+08	2.80569e+08	3.46324e+08	2.73515e+08	0.00241495	2.68939	1.42728	3.00136e+08	4.01553e+07	2.31837e+07	13.379	8.07182e+08	1.22328e+08	7.0626e+07	15.1549	0.0102825	1.31206	1.31214	2.61709	C10H19NO4	Acyl carnitines	UFAHZIUFPNSHSL-UHFFFAOYSA-N	[H][C@](CC([O-])=O)(C[N+](C)(C)C)OC(=O)CC	---	12879828	HMDB0000824	Lipids and lipid-like molecules	Fatty Acyls	UP
POS4790	Stearic acid amide	13.403	284.294	[M+H]+	284.295	True	5.47334e+06	6.97173e+06	9.12465e+06	1.90515e+07	2.23366e+07	3309.03	0.401232	0.521116	-0.940322	1.37971e+07	1.20582e+07	6.96179e+06	87.3964	7.1899e+06	1.83541e+06	1.05967e+06	25.5276	0.55213	0.581424	0.580749	0.396605	C18H37NO	Carboximidic acids	LYRFLYHAGKPMFH-UHFFFAOYSA-N	CCCCCCCCCCCCCCCCCC(=O)N	C13846	31292	HMDB0034146	Organic acids and derivatives	Carboximidic acids and derivatives	NoSig
POS3659	Isoleucylhydroxyproline	6.806	245.15	[M+H]+	245.15	True	2.08275e+08	2.1131e+08	2.2432e+08	9.93717e+07	1.13375e+08	1.19191e+08	0.000171227	1.93984	0.955936	1.10646e+08	1.01876e+07	5.88183e+06	9.20743	2.14635e+08	8.52367e+06	4.92114e+06	3.97124	0.00175831	1.35276	1.35275	3.76643	C11H20N2O4	Carboxylic acids and derivatives	IFZSZULHIWFRSB-KZVJFYERSA-N	CC[C@H](C)[C@H](N)C(=O)N1C[C@H](O)C[C@H]1C(O)=O	---	25227053	HMDB0028908	Organic acids and derivatives	Carboxylic acids and derivatives	UP
POS540	1H-Imidazole-4-carboxamide	1.456	112.051	[M+H]+	112.051	True	3.76882e+08	4.0351e+08	4.27811e+08	3.45834e+08	3.66438e+08	3.38782e+08	0.0361463	1.14952	0.201025	3.50351e+08	1.43709e+07	8.29705e+06	4.10186	4.02734e+08	2.54734e+07	1.47071e+07	6.32512	0.0842903	1.14896	1.14924	1.44194	C4H5N3O	Carboxylic acids and derivatives	ZBNZAJFNDPPMDT-UHFFFAOYSA-N	NC(=O)C1=CN=CN1	---	152917	HMDB0244880	Organic acids and derivatives	Carboxylic acids and derivatives	UP
POS2710	Panthenol	6.968	206.139	[M+H]+	206.139	True	1.6779e+07	2.03732e+07	2.37212e+07	1.48499e+07	1.85761e+07	2.03353e+07	0.409406	1.13229	0.179242	1.79204e+07	2.80089e+06	1.61709e+06	15.6296	2.02911e+07	3.47184e+06	2.00446e+06	17.1101	0.557741	0.571697	0.571689	0.387846	C9H19NO4	N-acyl amines	SNPLKNRPJHDVJA-ZETCQYMHSA-N	CC(C)(CO)[C@H](C(=O)NCCCO)O	C05944	131204	HMDB0004231	Organic oxygen compounds	Organooxygen compounds	NoSig
NEG4806	Tridecanedioic acid	11.008	243.16	[M-H]-	243.16	True	4.13031e+07	3.52711e+07	3.8234e+07	5.40651e+07	5.61164e+07	6.58249e+07	0.00712761	0.652295	-0.616403	5.86688e+07	6.28164e+06	3.62671e+06	10.7069	3.82694e+07	3.01617e+06	1.74138e+06	7.88141	0.023351	1.27177	1.27201	2.14706	C13H24O4	Long-chain fatty acids	DXNCZXXFRKPEPY-UHFFFAOYSA-N	C(CCCCCC(=O)O)CCCCCC(=O)O	---	10458	HMDB0002327	Lipids and lipid-like molecules	Fatty Acyls	DOWN
POS5811	Prostaglandin B1	10.212	319.227	[M+H-H2O]+	319.227	True	4.0305e+07	4.48833e+07	4.64232e+07	2.59695e+07	2.7934e+07	2.24996e+07	0.00162728	1.72259	0.784582	2.54677e+07	2.75173e+06	1.58871e+06	10.8048	4.38705e+07	3.18235e+06	1.83733e+06	7.25397	0.00756098	1.32192	1.32209	2.78854	C20H32O4	Prostaglandins and related compounds	YBHMPNRDOVPQIN-VSOYFRJCSA-N	CCCCCC(O)C=CC1=C(CCCCCCC(=O)O)C(=O)CC1	C00959	5280388	HMDB0002982	Lipids and lipid-like molecules	Fatty Acyls	UP
POS2389	Vitispirane	10.963	193.159	[M+H]+	193.159	True	6.94109e+07	7.13688e+07	7.52686e+07	38695852	4.42591e+07	4.14311e+07	0.00020344	1.73692	0.796529	4.1462e+07	2.78174e+06	1.60604e+06	6.70914	7.20161e+07	2.98199e+06	1.72165e+06	4.14072	0.0019575	1.35136	1.35143	3.69156	C13H20O	Tetrahydrofurans	DUPDJVDPPBFBPL-UHFFFAOYSA-N	CC1CCC2(O1)C(=C)C=CCC2(C)C	---	6450832	HMDB0036818	Organoheterocyclic compounds	Tetrahydrofurans	UP
NEG5456	9-(2,3-dihydroxypropoxy)-9-oxononanoic acid	8.697	261.134	[M-H]-	261.134	True	1.85389e+07	1.71218e+07	1.6781e+07	1.1851e+08	1.41645e+08	1.40598e+08	0.000105001	0.130858	-2.93393	1.33584e+08	1.30651e+07	7.54312e+06	9.78038	1.74805e+07	932225	538221	5.33293	0.00135065	1.35594	1.35593	3.97881	C12H22O6	Medium-chain fatty acids	BQRISQXLSXCXSC-UHFFFAOYSA-N	O=C(O)CCCCCCCC(=O)OCC(O)CO	---	45783154	---	Lipids and lipid-like molecules	Fatty Acyls	DOWN
NEG2818	Glycylleucine	6.871	187.108	[M-H]-	187.109	True	7.87867e+07	7.30719e+07	6.99592e+07	8.88073e+06	1.12473e+07	1.17104e+07	2.04514e-05	6.96699	2.80054	1.06128e+07	1.51778e+06	876288	14.3014	7.39392e+07	4.4772e+06	2.58491e+06	6.05524	0.000543297	1.36234	1.36233	4.68928	C8H16N2O3	Peptides	DKEXFJVMVGETOO-LURJTMIESA-N	O=C(O)C(N=C(O)CN)CC(C)C	C02155	92843;1548899	HMDB0000759	Organic acids and derivatives	Carboxylic acids and derivatives	UP
POS963	4-Methylproline	1.506	130.086	[M+H]+	130.087	True	5.06066e+08	7.09e+08	2.90743e+08	3.51069e+08	4.76783e+08	4.57297e+08	0.593306	1.1717	0.228603	4.28383e+08	6.76613e+07	3.90643e+07	15.7946	5.01936e+08	2.09159e+08	1.20758e+08	41.6704	0.722851	0.380352	0.380564	0.226721	C6H11NO2	Carboxylic acids and derivatives	KKJQZEWNZXRJFG-UHFFFAOYSA-N	CC1CNC(C1)C(O)=O	---	352051	HMDB0029435	Organic acids and derivatives	Carboxylic acids and derivatives	NoSig
POS1265	5-Hydroxymaltol	1.912	143.034	[M+H]+	143.034	True	1.25942e+08	1.25768e+08	1.4096e+08	9.48466e+07	9.58934e+07	8.64986e+07	0.00276083	1.41637	0.502193	9.24129e+07	5.14861e+06	2.97255e+06	5.57132	1.3089e+08	8.72125e+06	5.03521e+06	6.66302	0.0112458	1.30819	1.30829	2.55896	C6H6O4	Pyrans	SSSNQLHKSUJJTE-UHFFFAOYSA-N	CC1=C(O)C(=O)C(O)=CO1	---	70627	HMDB0032988	Organoheterocyclic compounds	Pyrans	UP
NEG5289	Tetradecanedioic acid	11.423	257.175	[M-H]-	257.176	True	2.24725e+07	2.68451e+07	2.85085e+07	2.51483e+07	2.90089e+07	3.56648e+07	0.324195	0.866447	-0.206816	2.99407e+07	5.31979e+06	3.07138e+06	17.7678	2.5942e+07	3.11764e+06	1.79997e+06	12.0177	0.471626	0.669316	0.669573	0.489194	C14H26O4	Long-chain fatty acids	HQHCYKULIHKCEB-UHFFFAOYSA-N	C(CCCCCCC(=O)O)CCCCCC(=O)O	---	13185	HMDB0000872	Lipids and lipid-like molecules	Fatty Acyls	NoSig
POS2092	Hippuric acid	8.012	180.065	[M+H]+	180.065	True	9.58622e+07	1.04505e+08	9.77816e+07	7.03906e+07	7.68011e+07	7.64882e+07	0.00176914	1.33293	0.414597	7.456e+07	3.61415e+06	2.08663e+06	4.8473	9.9383e+07	4.53852e+06	2.62031e+06	4.56669	0.00806676	1.32007	1.32015	2.75224	C9H9NO3	Benzamides	QIAFMBKCNZACKA-UHFFFAOYSA-N	OC(=O)CNC(=O)C1=CC=CC=C1	C01586	---	HMDB0000714	Benzenoids	Benzene and substituted derivatives	UP
NEG848	Hydroxyethyl glycine	0.899	118.049	[M-H]-	118.05	True	1.02015e+08	1.54242e+08	1.15028e+08	1.01304e+08	1.1219e+08	1.5724e+08	0.994071	1.00149	0.00214221	1.23578e+08	2.96555e+07	1.71216e+07	23.9974	1.23762e+08	2.71866e+07	1.56962e+07	21.9669	0.997043	0.00564572	0.0054051	0.00258273	C4H9NO3	Carboxylic acids and derivatives	XSISQURPIRTMAY-UHFFFAOYSA-N	NCC(=O)OCCO	---	12603040	HMDB0061148	Organic acids and derivatives	Carboxylic acids and derivatives	NoSig
NEG2158	3-Phenyllactic acid	8.763	165.054	[M-H]-	165.056	True	5.03332e+07	4.66248e+07	4.86202e+07	1.90096e+07	2.00411e+07	2.19009e+07	3.24132e-05	2.38842	1.25606	2.03172e+07	1.46528e+06	845980	7.21202	4.8526e+07	1.85601e+06	1.07157e+06	3.82477	0.000649749	1.36107	1.36102	4.48928	C9H10O3	Phenylpropanoic acids	VOXXWSYKYCBWHO-MRVPVSSYSA-N	O=C(O)C(O)CC=1C=CC=CC1	C05607	---	HMDB0000779	Phenylpropanoids and polyketides	Phenylpropanoic acids	UP
POS4848	C17 Sphingosine	10.77	286.274	[M+H]+	286.274	True	2.15335e+09	2.24376e+09	2.49079e+09	8.9006e+08	8.195e+08	9.70861e+08	0.000217398	2.56971	1.3616	8.93474e+08	7.57381e+07	4.37274e+07	8.47681	2.29597e+09	1.74671e+08	1.00846e+08	7.60774	0.00203955	1.35093	1.35089	3.66274	C17H35NO2	Alkanolamines	RBEJCQPPFCKTRZ-BUHFOSPRSA-N	OCC(N)C(O)C=CCCCCCCCCCCCC	---	14767873	---	Organic nitrogen compounds	Organonitrogen compounds	UP
POS2263	Indole-3-Lactic Acid	7.181	188.071	[M+H-H2O]+	188.07	True	1.02375e+10	1.12197e+10	1.03333e+10	8.49732e+09	8.79777e+09	9.26679e+09	0.0105604	1.19685	0.259241	8.85396e+09	3.878e+08	2.23897e+08	4.37996	1.05969e+10	5.41555e+08	3.12667e+08	5.11052	0.0320445	1.251	1.25099	1.97632	C11H11NO3	Indolyl carboxylic acids and derivatives	XGILAAMKEQUXLS-UHFFFAOYSA-N	C1=CC=C2C(=C1)C(=CN2)CC(C(=O)O)O	C02043	92904	HMDB0000671	Organoheterocyclic compounds	Indoles and derivatives	UP
POS6138	Clupanodonic acid	12.192	331.263	[M+H]+	331.263	True	3309.03	6.28751e+08	6.66206e+08	3309.03	5.31727e+08	5.29292e+08	0.793884	1.22048	0.287454	3.53674e+08	3.0629e+08	1.76837e+08	86.6024	4.31653e+08	3.74289e+08	2.16096e+08	86.7105	0.876773	0.188863	0.189098	0.100243	C22H34O2	Very long-chain fatty acids	YUFFSWGQGVEMMI-JLNKQSITSA-N	CC/C=C\C/C=C\C/C=C\C/C=C\C/C=C\CCCCCC(=O)O	C16513	5497182	HMDB0006528	Lipids and lipid-like molecules	Fatty Acyls	NoSig
POS2489	Citrulline	1.379	198.085	[M+Na]+	198.085	True	1.88783e+08	1.97586e+08	1.86212e+08	1.76344e+08	1.50631e+08	1.44926e+08	0.0307461	1.21335	0.278997	1.573e+08	1.6737e+07	9.6631e+06	10.6401	1.9086e+08	5.96461e+06	3.44367e+06	3.12512	0.0733822	1.16659	1.16664	1.51221	C6H13N3O3	Amino acids and derivatives	RHGKLRLOHDJJDR-BYPYZUCNSA-N	N=C(O)NCCC[C@H](N)C(=O)O	C00327	9750;6992098	HMDB0000904	Organic acids and derivatives	Carboxylic acids and derivatives	UP
POS4642	Triphenylphosphine oxide	11.052	279.093	[M+H]+	279.093	True	3.91422e+07	4.52304e+07	4.63554e+07	5.1185e+07	4.91085e+07	4.56601e+07	0.139756	0.895682	-0.158941	4.86512e+07	2.79068e+06	1.6112e+06	5.7361	4.3576e+07	3.88072e+06	2.24053e+06	8.90564	0.250413	0.92583	0.925531	0.854631	C18H15OP	Phenylphosphines and derivatives	FIQMHBFVRAXMOP-UHFFFAOYSA-N	C1=CC=C(C=C1)P(=O)(C2=CC=CC=C2)C3=CC=CC=C3	---	13097	---	Benzenoids	Benzene and substituted derivatives	NoSig
NEG204	Monoethyl carbonate	6.653	89.0228	[M-H]-	89.0239	True	4.35406e+08	4.47267e+08	2.62781e+08	6.16188e+08	6.63077e+08	6.7708e+08	0.0123304	0.585507	-0.772242	6.52115e+08	3.18916e+07	1.84126e+07	4.89049	3.81818e+08	1.0326e+08	5.9617e+07	27.0442	0.0359612	1.24147	1.24146	1.90902	C3H6O3	Organic carbonic acids and derivatives	CQDGTJPVBWZJAZ-UHFFFAOYSA-N	CCOC(O)=O	---	105349	HMDB0031232	Organic acids and derivatives	Organic carbonic acids and derivatives	DOWN
NEG461	2-Methyl-3-oxopropanoic acid	4.892	101.023	[M-H]-	101.024	True	5.28107e+07	4.33672e+07	2.77467e+07	5.29866e+07	3.21989e+07	2.61766e+07	0.721011	1.11281	0.154204	3.71207e+07	1.40663e+07	8.1212e+06	37.8935	4.13082e+07	1.26582e+07	7.30821e+06	30.6433	0.816965	0.257361	0.257362	0.142058	C4H6O3	Organooxygen compounds	VOKUMXABRRXHAR-UHFFFAOYSA-N	CC(C=O)C(O)=O	C00349	296	HMDB0001172	Organic oxygen compounds	Organooxygen compounds	NoSig
POS1544	Histidine	1.279	156.077	[M+H]+	156.077	True	9.94783e+08	9.73589e+08	1.01571e+09	9.54708e+08	9.02917e+08	8.92684e+08	0.0265578	1.085	0.117691	9.1677e+08	3.32517e+07	1.91979e+07	3.62705	9.94692e+08	2.10585e+07	1.21581e+07	2.11709	0.0663675	1.1812	1.18116	1.57581	C6H9N3O2	Amino acids and derivatives	HNDVDQJCIGZPNO-IFJFHIPQNA-N	N[C@@H](CC1=CN=CN1)C(O)=O	C00135	6274;6971009	HMDB0000177	Organic acids and derivatives	Carboxylic acids and derivatives	UP
POS841	3h-Taurine	1.343	126.022	[M+H]+	126.022	True	8.28224e+08	1.00012e+09	8.80476e+08	1.13692e+09	1.35352e+09	1.31544e+09	0.0120949	0.711746	-0.490566	1.26862e+09	1.1564e+08	6.67648e+07	9.11538	9.02938e+08	8.81194e+07	5.08758e+07	9.75918	0.0355288	1.24284	1.24269	1.9174	C2H7NO3S	Thiocarbonyl compounds	VGCNMTSJZXBQKI-UHFFFAOYSA-N	NCC=S(O)(O)=O	---	129664824	HMDB0246277	Organosulfur compounds	Thiocarbonyl compounds	DOWN
NEG3325	Sebacic acid	9.607	201.113	[M-H]-	201.113	True	7.4348e+07	6.82883e+07	7.17606e+07	1.05116e+08	1.03364e+08	1.12659e+08	0.000444231	0.667614	-0.582913	1.07046e+08	4.93936e+06	2.85174e+06	4.61423	7.14656e+07	3.0406e+06	1.75549e+06	4.25463	0.00307202	1.34364	1.34378	3.35239	C10H18O4	Medium-chain fatty acids	CXMXRPHRNRROMY-UHFFFAOYSA-N	C(CCCCC(=O)O)CCCC(=O)O	C08277	5192	HMDB0000792	Lipids and lipid-like molecules	Fatty Acyls	DOWN
POS2589	Pantothenic acid	6.993	202.107	[M+H-H2O]+	202.107	True	5.08514e+07	5.12147e+07	5.00982e+07	3.39933e+07	3.83356e+07	4.02866e+07	0.00221611	1.35118	0.434225	3.75385e+07	3.22147e+06	1.85992e+06	8.58179	5.07214e+07	569477	328788	1.12275	0.00967176	1.31452	1.31448	2.65441	C9H17NO5	Amino acids and derivatives	GHOKWGTUZJEAQD-ZETCQYMHSA-N	CC(C)(CO)C(O)C(O)=NCCC(=O)O	C00864	988	HMDB0000210	Organic acids and derivatives	Carboxylic acids and derivatives	UP
NEG7241	Indoxyl glucuronide	7.751	308.078	[M-H]-	308.078	True	9.90495e+06	9.734e+06	9.90103e+06	8.22116e+06	8.571e+06	9.44207e+06	0.0399533	1.12601	0.171218	8.74474e+06	628723	362994	7.18973	9.84666e+06	97586	56341.3	0.991057	0.0902336	1.13799	1.1377	1.39845	C14H15NO7	Sugar acids and derivatives	KUYNOZVWCFXSNE-BYNIDDHOSA-N	O=C(O)C1OC(OC2=CNC=3C=CC=CC23)C(O)C(O)C1O	---	2733785	HMDB0010319	Organic oxygen compounds	Organooxygen compounds	UP
NEG13017	Taurohyocholate	10.33	514.284	[M-H]-	514.284	True	2.33061e+07	2.28768e+07	2.10444e+07	1.69434e+07	1.19774e+07	1.55276e+07	0.00963792	1.51248	0.596916	1.48161e+07	2.55832e+06	1.47705e+06	17.2671	2.24091e+07	1.20118e+06	693500	5.36022	0.0296664	1.2565	1.25626	2.01602	C26H45NO7S	Steroids and steroid derivatives	XSOLDPYUICCHJX-RBPXSRGGSA-N	[H][C@@]12C[C@H](O)CC[C@]1(C)C1CC[C@]3(C)[C@H](CCC3C1[C@@H](O)[C@H]2O)[C@H](C)CCC(=O)NCCS(O)(=O)=O	C15516	139292152	HMDB0011637	Lipids and lipid-like molecules	Steroids and steroid derivatives	UP
POS1345	Indole-3-carboxyaldehyde	7.181	146.06	[M+H]+	146.06	True	5.62738e+08	6.44141e+08	5.78041e+08	4.97243e+08	5.11086e+08	5.29757e+08	0.0368539	1.16048	0.214723	5.12695e+08	1.63168e+07	9.42051e+06	3.18255	5.94973e+08	4.32621e+07	2.49774e+07	7.27126	0.0852944	1.14699	1.14705	1.43352	C9H7NO	Indoles	OLNJUISKUQQNIM-UHFFFAOYSA-N	O=Cc1c[nH]c2ccccc12	C08493	10256	HMDB0029737	Organoheterocyclic compounds	Indoles and derivatives	UP
POS9	2-Hydroxyacetamide	1.309	76.0399	[M+H]+	76.0393	True	1.95271e+08	3.08619e+08	1.25133e+08	1.94952e+08	2.70629e+08	2.31631e+08	0.713959	0.902199	-0.148483	2.32404e+08	3.78446e+07	2.18496e+07	16.284	2.09674e+08	9.25869e+07	5.3455e+07	44.1574	0.811589	0.264401	0.264033	0.146327	C2H5NO2	Carboxylic acids and derivatives	TZGPACAKMCUCKX-UHFFFAOYSA-N	NC(=O)CO	---	69021	HMDB0245149	Organic acids and derivatives	Carboxylic acids and derivatives	NoSig
NEG6838	5-Oxooctadecanoic acid	11.54	297.243	[M-H]-	297.243	True	833978	4.88353e+08	4.90906e+08	1.19337e+06	2.94737e+08	6.72477e+08	0.988478	1.01207	0.0173062	3.22802e+08	3.36521e+08	1.9429e+08	104.25	3.26698e+08	2.82209e+08	1.62934e+08	86.3823	0.996634	0.0106554	0.0105033	0.00503289	C18H34O3	Fatty Acyls	UIROXHXJKJUFSV-UHFFFAOYSA-N	CCCCCCCCCCCCCC(=O)CCCC(O)=O	---	85548	HMDB0034074	Lipids and lipid-like molecules	Fatty Acyls	NoSig
NEG6126	Linoleic acid	12.365	279.232	[M-H]-	279.233	True	1.35195e+06	4.57136e+07	5.03938e+07	721478	6.11424e+07	5.71388e+07	0.788142	0.818968	-0.288121	3.96676e+07	3.37877e+07	1.95073e+07	85.177	3.24865e+07	2.70646e+07	1.56258e+07	83.3105	0.873965	0.194692	0.194437	0.103395	C18H32O2	Lineolic acids and derivatives	OYHQOLUKZRVURQ-HZJYTTRNSA-N	CCCCC\C=C/C\C=C/CCCCCCCC(O)=O	C01595	---	HMDB0000673	Lipids and lipid-like molecules	Fatty Acyls	NoSig
NEG11702	Fipronil sulfone	12.395	450.926	[M-H]-	450.926	True	3.09511e+07	3.06112e+07	3.33443e+07	2.53293e+07	1.89404e+07	2.46403e+07	0.0169679	1.37725	0.461794	2.297e+07	3.50673e+06	2.02461e+06	15.2666	3.16355e+07	1.48954e+06	859987	4.70844	0.0469112	1.21958	1.21925	1.77037	C12H4Cl2F6N4O2S	Phenylpyrazoles	LGHZJDKSVUTELU-UHFFFAOYSA-N	NC1=C(C(=NN1C1=C(Cl)C=C(C=C1Cl)C(F)(F)F)C#N)S(=O)(=O)C(F)(F)F	---	3078139	HMDB0252267	Organoheterocyclic compounds	Azoles	UP
POS21264	PC(16:1/16:1)	12.452	730.536	[M+H]+	730.538	True	4.1005e+07	9.18126e+07	7.73111e+07	4.01457e+06	8.8985e+06	6.88775e+06	0.0139154	10.6121	3.40764	6.60027e+06	2.45463e+06	1.41718e+06	37.1898	7.00429e+07	2.6172e+07	1.51104e+07	37.3657	0.0398773	1.23335	1.23348	1.8565	C40H76NO8P	Phosphatidylcholines	GPWHCUUIQMGELX-VHQDNGOZSA-N	CCCCCC/C=C\CCCCCCCC(=O)OC[C@H](COP(=O)([O-])OCC[N+](C)(C)C)OC(=O)CCCCCCC/C=C\CCCCCC	---	24778764	HMDB0008002	Lipids and lipid-like molecules	Glycerophospholipids	UP
POS1014	Creatine	1.789	132.077	[M+H]+	132.077	True	1.02668e+10	2.65068e+10	1.20465e+10	1.69047e+10	1.67533e+10	1.88921e+10	0.822386	0.929018	-0.106221	1.75167e+10	1.19352e+09	6.89077e+08	6.81359	1.62733e+10	8.90697e+09	5.14244e+09	54.7335	0.894088	0.162836	0.162679	0.0849245	C4H9N3O2	Amino acids and derivatives	CVSVTCORWBXHQV-UHFFFAOYSA-N	O=C(O)CN(C(=N)N)C	C00300	586	HMDB0000064	Organic acids and derivatives	Carboxylic acids and derivatives	NoSig
NEG6263	Xanthosine	6.713	283.068	[M-H]-	283.068	True	2.53926e+08	2.46104e+08	2.3651e+08	2.17376e+08	2.60868e+08	2.75279e+08	0.770292	0.97746	-0.0328898	2.51174e+08	3.01443e+07	1.74038e+07	12.0013	2.45513e+08	8.72313e+06	5.0363e+06	3.55302	0.858848	0.210965	0.211075	0.113344	C10H12N4O6	Purine nucleosides	UBORTCNDUKBEOP-UUOKFMHZSA-N	OCC1OC(n2cnc3c(O)nc(O)nc32)C(O)C1O	C01762	64959	HMDB0000299	Nucleosides, nucleotides, and analogues	Purine nucleosides	NoSig
POS547	Histamine	1.261	112.087	[M+H]+	112.087	True	2.56905e+09	2.87544e+09	2.7442e+09	2.63918e+09	2.68551e+09	2.53576e+09	0.331853	1.04176	0.059019	2.62015e+09	7.66703e+07	4.42656e+07	2.92618	2.72956e+09	1.5372e+08	8.87501e+07	5.63166	0.477649	0.65991	0.66043	0.479055	C5H9N3	Primary amines	NTYJJOPFIAHURM-FZOZFQFYNA-N	N1=CNC(=C1)CCN	C00388	774	HMDB0000870	Organic nitrogen compounds	Organonitrogen compounds	NoSig
NEG3783	Undecanedioic acid	10.107	215.128	[M-H]-	215.129	True	5.05977e+07	5.02207e+07	4.4904e+07	1.43439e+08	1.42305e+08	1.54905e+08	2.42825e-05	0.330699	-1.59641	1.46883e+08	6.97023e+06	4.02426e+06	4.74542	4.85741e+07	3.184e+06	1.83829e+06	6.55494	0.000579616	1.36182	1.36188	4.61471	C11H20O4	Medium-chain fatty acids	LWBHHRRTOZQPDM-UHFFFAOYSA-N	OC(=O)CCCCCCCCCC(O)=O	---	15816	HMDB0000888	Lipids and lipid-like molecules	Fatty Acyls	DOWN
POS871	Thymine	6.887	127.05	[M+H]+	127.05	True	1.73586e+08	1.24549e+08	1.57281e+08	1.36466e+08	1.54321e+08	1.00309e+08	0.374188	1.16446	0.219664	1.30365e+08	2.75181e+07	1.58876e+07	21.1084	1.51805e+08	2.49727e+07	1.4418e+07	16.4505	0.525584	0.610808	0.611185	0.42691	C5H6N2O2	Hydroxypyrimidines	RWQNBRDOKXIBIV-ZDKSUBDRNA-N	OC1=NC=C(C(O)=N1)C	C00178	1135	HMDB0000262	Organoheterocyclic compounds	Diazines	NoSig
POS509	3,4-Diaminopyridine	1.278	110.072	[M+NH4]+	110.071	True	2.70345e+08	2.55923e+08	2.80174e+08	2.56412e+08	2.52735e+08	2.2358e+08	0.121807	1.1006	0.138296	2.44242e+08	1.79886e+07	1.03857e+07	7.36505	2.68814e+08	1.21978e+07	7.04238e+06	4.53762	0.222162	0.956325	0.956618	0.914326	C5H7N3	Pyridines and derivatives	OYTKINVCDFNREN-UHFFFAOYSA-N	NC1=CNC=CC1=N	---	5918	HMDB0246022	Organoheterocyclic compounds	Pyridines and derivatives	NoSig
NEG7877	o-Dodecylbenzenesulfonic acid	10.416	325.184	[M-H]-	325.184	True	6.71477e+08	2.37239e+08	3.92871e+08	2.42561e+08	1.07959e+09	3.55663e+08	0.689049	0.775764	-0.366311	5.59271e+08	4.54144e+08	2.622e+08	81.2028	4.33862e+08	2.20002e+08	1.27018e+08	50.7079	0.792123	0.288252	0.287705	0.16175	C18H30O3S	Benzenesulfonic acids and derivatives	WBIQQQGBSDOWNP-UHFFFAOYSA-N	CCCCCCCCCCCCC1=CC=CC=C1S(=O)(=O)O	---	25457	HMDB0031031	Benzenoids	Benzene and substituted derivatives	NoSig
NEG4775	N-Undecanoylglycine	10.175	242.176	[M-H]-	242.176	True	2.92475e+08	2.83949e+08	2.58764e+08	3.77912e+08	4.0765e+08	4.32634e+08	0.00244421	0.685593	-0.544576	4.06066e+08	2.73952e+07	1.58166e+07	6.7465	2.78396e+08	1.75282e+07	1.01199e+07	6.29616	0.0102882	1.31173	1.31181	2.61186	C13H25NO3	Carboxylic acids and derivatives	HEUQYIQQCNOXOG-UHFFFAOYSA-N	CCCCCCCCCCC(=O)NCC(O)=O	---	454092	HMDB0013286	Organic acids and derivatives	Carboxylic acids and derivatives	DOWN
POS1021	D-Leucine	3.841	132.102	[M+H]+	132.102	True	6.43398e+09	1.70309e+10	1.60599e+10	1.01112e+10	8.04558e+09	1.31974e+10	0.502356	1.26059	0.334098	1.04514e+10	2.59271e+09	1.4969e+09	24.8072	1.31749e+10	5.85798e+09	3.38211e+09	44.4631	0.644831	0.472565	0.472446	0.298988	C6H13NO2	Carboxylic acids and derivatives	ROHFNLRQFUQHCH-RXMQYKEDSA-N	CC(C)C[C@@H](N)C(O)=O	C01570	439524;6950207	HMDB0013773	Organic acids and derivatives	Carboxylic acids and derivatives	NoSig
POS2060	Bethanidine	7.129	178.134	[M+CH3OH+H]+	178.134	True	1.28085e+08	1.51183e+08	1.64292e+08	7.97384e+08	7.94135e+08	7.74097e+08	9.67372e-07	0.187503	-2.41501	7.88539e+08	1.26121e+07	7.28162e+06	1.59943	1.47853e+08	1.83319e+07	1.05839e+07	12.3987	0.000131348	1.3663	1.36628	6.01441	C10H15N3	Benzene and substituted derivatives	NIVZHWNOUVJHKV-UHFFFAOYSA-N	CN\C(NCC1=CC=CC=C1)=N/C	---	2368	HMDB0014362	Benzenoids	Benzene and substituted derivatives	DOWN
POS4707	8,12-Octadecadienoic acid	12.427	281.247	[M+H]+	281.248	True	8.96554e+06	1.3881e+08	1.33904e+08	50137.9	1.64277e+08	1.49618e+08	0.88115	0.897224	-0.15646	1.04648e+08	9.08807e+07	5.247e+07	86.8439	9.3893e+07	7.35903e+07	4.24874e+07	78.3767	0.935505	0.108852	0.10857	0.0549499	C18H32O2	Fatty Acyls	FVIFMUSFIUXENC-UHFFFAOYSA-N	CCCCCC=CCCC=CCCCCCCC(O)=O	---	122193	HMDB0247466	Lipids and lipid-like molecules	Fatty Acyls	NoSig
POS763	3-Ethylaniline	12.538	122.097	[M+H]+	122.096	True	1.4636e+09	9.77512e+08	7.54039e+08	1.02189e+09	3.4161e+09	1.84357e+09	0.233095	0.508656	-0.975238	2.09385e+09	1.21657e+09	7.02387e+08	58.102	1.06505e+09	3.6279e+08	2.09457e+08	34.0632	0.363956	0.785972	0.785509	0.632466	C8H11N	Benzene and substituted derivatives	AMKPQMFZCBTTAT-UHFFFAOYSA-N	CCC1=CC(N)=CC=C1	---	11475	HMDB0245866	Benzenoids	Benzene and substituted derivatives	NoSig
POS464	3-Ethylpyridine	13.299	108.081	[M+Na]+	108.081	True	1.15856e+08	3.26805e+08	2.97974e+08	2.37973e+08	2.2964e+08	1.85046e+08	0.688727	1.1348	0.182432	2.17553e+08	2.84586e+07	1.64306e+07	13.0812	2.46878e+08	1.14381e+08	6.60377e+07	46.3308	0.792123	0.28765	0.288012	0.161953	C7H9N	Pyridines and derivatives	MFEIKQPHQINPRI-UHFFFAOYSA-N	CCC1=CC=CN=C1	---	10823	HMDB0029734	Organoheterocyclic compounds	Pyridines and derivatives	NoSig
POS2366	Diethyltoluamide	11.105	192.138	[M+H]+	192.138	True	3.17669e+07	3.17901e+07	3.08429e+07	4.22622e+07	4.2522e+07	4.2171e+07	5.0504e-06	0.743569	-0.427462	4.23184e+07	182120	105147	0.430358	3.14666e+07	540322	311955	1.71713	0.000280487	1.36489	1.36487	5.29667	C12H17NO	Toluamides	MMOXZBCLCQITDF-UHFFFAOYSA-N	CCN(CC)C(=O)C1=CC=CC(C)=C1	C10935	4284	HMDB0250930	Benzenoids	Benzene and substituted derivatives	DOWN
NEG6918	3-Hydroxyoctadecanoic Acid	13.066	299.259	[M-H]-	299.259	True	5.74821e+06	1.19624e+08	1.33257e+08	7.22489e+06	8.27126e+07	7.47522e+07	0.541583	1.5704	0.65113	5.48965e+07	4.14763e+07	2.39463e+07	75.5535	8.62094e+07	7.00141e+07	4.04226e+07	81.2139	0.68158	0.432031	0.43229	0.266335	C18H36O3	Fatty Acyls	POMQYTSPMKEQNB-UHFFFAOYSA-N	[H][C@@](O)(CCCCCCCCCCCCCCC)CC(O)=O	---	5312838	HMDB0010737	Lipids and lipid-like molecules	Fatty Acyls	NoSig
NEG6690	3,4-Dimethyl-5-propyl-2-furannonanoic acid	12.293	293.212	[M-H]-	293.212	True	2.15138e+07	1.46394e+07	1.91988e+07	3.54313e+07	6.065e+07	6.20002e+07	0.0181582	0.350148	-1.51396	5.26939e+07	1.4965e+07	8.64007e+06	28.3999	1.84507e+07	3.49774e+06	2.01942e+06	18.9573	0.0491155	1.21405	1.21404	1.74093	C18H30O3	Fatty Acyls	NMZGYZMOQZXEOU-UHFFFAOYSA-N	CCCC1=C(C)C(C)=C(CCCCCCCCC(O)=O)O1	---	13963864	HMDB0061644	Lipids and lipid-like molecules	Fatty Acyls	DOWN
NEG7513	5,8-Epoxy-13-cis-retinoic acid	10.397	315.196	[M-H2O-H]-	315.196	True	4.18821e+07	4.25738e+07	3.94183e+07	3.75595e+07	4.21122e+07	4.56909e+07	0.854683	0.988128	-0.0172306	4.17875e+07	4.07544e+06	2.35296e+06	9.75277	4.12914e+07	1.65861e+06	957598	4.01684	0.916964	0.132673	0.132888	0.0681951	C20H28O3	Prenol lipids	QDOSIDVGVRAXSE-DYIZZJGFSA-N	C\C(\C=C\C=C(/C)C1OC2(C)CCCC(C)(C)C2=C1)=C\C(O)=O	---	71316382	HMDB0062412	Lipids and lipid-like molecules	Prenol lipids	NoSig
NEG5294	3-hydroxypentadecanoic acid	13.114	257.212	[M-H]-	257.212	True	7.34438e+07	6.45159e+07	6.13546e+07	6.23672e+07	6.96738e+07	6.62849e+07	0.941104	1.00498	0.00717254	6.61086e+07	3.65651e+06	2.11109e+06	5.53107	6.64381e+07	6.26961e+06	3.61976e+06	9.43676	0.977745	0.0536118	0.0537164	0.0263623	C15H30O3	Fatty Acyls	ATMSEJBABXCWDW-UHFFFAOYSA-N	CCCCCCCCCCCCC(O)CC(O)=O	---	182089	HMDB0061657	Lipids and lipid-like molecules	Fatty Acyls	NoSig
POS6685	IMP	3.372	349.055	[M+H]+	349.054	True	4.29285e+08	6.39173e+08	3.63741e+08	5.28597e+06	5.36538e+06	5.18058e+06	0.00473152	90.4627	6.49925	5.27731e+06	92702.1	53521.6	1.75662	4.774e+08	1.43881e+08	8.307e+07	30.1386	0.0168079	1.28978	1.28985	2.325	C10H13N4O8P	Purine ribonucleoside monophosphates	GRSZFWQUAKGDAV-KQYNXXCUSA-N	O=P(O)(O)OCC1OC(N2C=NC=3C(O)=NC=NC32)C(O)C1O	C00130	---	HMDB0000175	Nucleosides, nucleotides, and analogues	Purine nucleotides	UP
POS3542	Pirbuterol	6.72	241.155	[M+H]+	241.155	True	9.32802e+07	1.51146e+08	1.39418e+08	7.94515e+07	8.5144e+07	7.7199e+07	0.0565512	1.58748	0.666739	8.05982e+07	4.0947e+06	2.36408e+06	5.08039	1.27948e+08	3.05906e+07	1.76615e+07	23.9086	0.119767	1.0923	1.09251	1.24756	C12H20N2O3	Pyridines and derivatives	VQDBNKDJNJQRDG-UHFFFAOYSA-N	CC(C)(C)NCC(O)C1=NC(CO)=C(O)C=C1	C07807	4845	HMDB0015407	Organoheterocyclic compounds	Pyridines and derivatives	NoSig
POS647	Proline	1.781	116.071	[M+H]+	116.071	True	4.51062e+09	3.81402e+09	9.55967e+08	3.08976e+09	2.74728e+09	4.34904e+09	0.812526	0.911107	-0.134308	3.39536e+09	8.43478e+08	4.86983e+08	24.8421	3.09354e+09	1.88367e+09	1.08754e+09	60.8905	0.887316	0.171473	0.171803	0.0901629	C5H9NO2	Amino acids and derivatives	ONIBWKKTOPOVIA-BYPYZUCNSA-N	O=C(O)C1NCCC1	C00148	145742	HMDB0000162	Organic acids and derivatives	Carboxylic acids and derivatives	NoSig
NEG4794	Pseudouridine	2.123	243.062	[M-H]-	243.062	True	7.22779e+07	7.80703e+07	4.52693e+07	5.0645e+07	6.17034e+07	7.35779e+07	0.802423	1.05212	0.0733048	6.19754e+07	1.14688e+07	6.62153e+06	18.5054	6.52058e+07	1.75068e+07	1.01075e+07	26.8485	0.879869	0.181293	0.181169	0.0955969	C9H12N2O6	Nucleoside and nucleotide analogues	PTJWIQPHWPFNBW-GBNDHIKLSA-N	OC1=NC=C(C(O)=N1)C2OC(CO)C(O)C2O	C02067	15047	HMDB0000767	Nucleosides, nucleotides, and analogues	Nucleoside and nucleotide analogues	NoSig
POS6259	Prostaglandin E2	10.402	335.222	[M+H-H2O]+	335.222	True	3.63873e+08	3.98494e+08	4.04203e+08	3.20461e+08	3.49438e+08	3.30113e+08	0.0217657	1.16656	0.222254	3.33338e+08	1.4755e+07	8.51882e+06	4.42645	3.88857e+08	2.18237e+07	1.25999e+07	5.61227	0.0564707	1.19893	1.19918	1.66223	C20H32O5	Prostaglandins and related compounds	XEYBRNLFEZDVAW-ARSRFYASSA-N	CCCCCC(O)C=CC1C(O)CC(=O)C1CC=CCCCC(=O)O	C00584	5280360	HMDB0001220	Lipids and lipid-like molecules	Fatty Acyls	UP
POS4651	alpha-Eleostearic acid	11.884	279.231	[M+H]+	279.232	True	8.65026e+07	1.36932e+08	1.52896e+08	7.42651e+07	1.40793e+08	1.40386e+08	0.826851	1.05876	0.0823749	1.18482e+08	3.82931e+07	2.21086e+07	32.3199	1.25443e+08	3.46556e+07	2.00084e+07	27.6264	0.896551	0.158345	0.158551	0.0825725	C18H30O2	Fatty Acyls	CUXYLFPMQMFGPL-UHFFFAOYSA-N	CCCCC=CC=CC=CCCCCCCCC(O)=O	C08315	93077	HMDB0248208	Lipids and lipid-like molecules	Fatty Acyls	NoSig
NEG6830	4-(Decan-4-yl)benzenesulfonic acid	10.218	297.153	[M-H]-	297.153	True	4.4223e+07	1.98337e+07	7.0839e+07	12878867	1.19363e+07	4.02241e+07	0.251968	2.07406	1.05246	2.16798e+07	1.60668e+07	9.27618e+06	74.1097	4.49652e+07	2.55108e+07	1.47286e+07	56.7344	0.385846	0.76064	0.760227	0.598654	C16H26O3S	Benzenesulfonic acids and derivatives	NANHIUZYPFDGJS-UHFFFAOYSA-N	OS(=O)(=O)c1ccc(cc1)C(CCC)CCCCCC	---	14921167	---	Benzenoids	Benzene and substituted derivatives	NoSig
NEG6916	2-Hydroxystearic acid	12.928	299.259	[M-H]-	299.259	True	5.04154e+06	4.19588e+07	5.89561e+07	8.29764e+06	4.51374e+07	3.93957e+07	0.834306	1.14139	0.190797	3.09436e+07	1.9821e+07	1.14436e+07	64.0552	3.53188e+07	2.75638e+07	1.5914e+07	78.0428	0.902232	0.151401	0.151666	0.0786745	C18H36O3	Long-chain fatty acids	KIHBGTRZFAVZRV-KRWDZBQOSA-N	CCCCCCCCCCCCCCCC[C@H](O)C(O)=O	C03045	439887	HMDB0062549	Lipids and lipid-like molecules	Fatty Acyls	NoSig
NEG3587	2-Ethyl-1-hexanol sulfate	11.358	209.084	[M-H]-	209.085	True	4.56335e+07	4.59457e+07	3.62348e+07	5.18648e+07	2.69875e+07	6.12593e+07	0.721363	0.91223	-0.13253	4.67039e+07	1.77092e+07	1.02244e+07	37.9181	4.26047e+07	5.51867e+06	3.18621e+06	12.9532	0.816965	0.256242	0.25703	0.141846	C8H18O4S	Organic sulfuric acids and derivatives	MHGOKSLTIUHUBF-UHFFFAOYSA-N	CCCCC(CC)COS(O)(=O)=O	---	31364	HMDB0033373	Organic acids and derivatives	Organic sulfuric acids and derivatives	NoSig
POS868	4-Hydroxy-2H-pyran-3-carboxaldehyde	3.922	127.039	[M+Na]+	127.04	True	3.03933e+08	3.85808e+08	4.28885e+08	4.51512e+08	3.65616e+08	2.681e+08	0.871193	1.03077	0.0437288	3.61743e+08	9.17673e+07	5.29819e+07	25.3681	3.72875e+08	6.34715e+07	3.66453e+07	17.0222	0.92735	0.117338	0.11771	0.0598859	C6H6O3	Pyrans	ZNUNRMPPGAAKKR-UHFFFAOYSA-N	OC1=C(COC=C1)C=O	---	---	HMDB0031256	Organoheterocyclic compounds	Pyrans	NoSig
POS12	Glycine	1.833	76.0401	[M+H]+	76.0393	True	1.37597e+08	1.06209e+08	9.13528e+07	7.48481e+07	1.0078e+08	1.09392e+08	0.384586	1.17591	0.23378	9.50067e+07	1.7981e+07	1.03813e+07	18.926	1.1172e+08	2.36095e+07	1.3631e+07	21.1328	0.536488	0.599555	0.599396	0.415007	C2H5NO2	Amino acids and derivatives	DHMQDGOQFOQNFH-UHFFFAOYSA-N	C(C(=O)O)N	C00037	750	HMDB0000123	Organic acids and derivatives	Carboxylic acids and derivatives	NoSig
POS11403	LPC(16:1)	11.878	494.325	[M+H]+	494.325	True	1.25489e+08	1.58029e+08	1.39739e+08	1.21128e+08	1.36388e+08	1.45444e+08	0.596829	1.05037	0.070897	1.3432e+08	1.22889e+07	7.09501e+06	9.149	1.41086e+08	1.63117e+07	9.41755e+06	11.5615	0.723915	0.376997	0.377085	0.22415	C24H48NO7P	Glycerophospholipids	LFUDDCMNKWEORN-ZXEGGCGDSA-N	CCCCCC\C=C/CCCCCCCC(=O)OC[C@@H](O)COP([O-])(=O)OCC[N+](C)(C)C	---	24779461	HMDB0010383	Lipids and lipid-like molecules	Glycerophospholipids	NoSig
POS5947	Linoleoyl Ethanolamide	13.09	324.29	[2M+H]+	324.29	True	4.17932e+07	4.55836e+07	4.46468e+07	4.39391e+07	4.52186e+07	4.16795e+07	0.809931	1.00907	0.013023	4.36124e+07	1.79201e+06	1.03462e+06	4.10895	4.40079e+07	1.9743e+06	1.13986e+06	4.48625	0.885274	0.173479	0.174207	0.0915518	C20H37NO2	Carboximidic acids and derivatives	KQXDGUVSAAQARU-HZJYTTRNSA-N	CCCCCC=CCC=CCCCCCCCC(=O)NCCO	---	2183	HMDB0012252	Organic acids and derivatives	Carboximidic acids and derivatives	NoSig
NEG11265	Fipronil	12.26	434.931	[M-H]-	434.931	True	1.36288e+07	1.2618e+07	1.84051e+07	1.51302e+07	1.34774e+07	1.45494e+07	0.80088	1.03464	0.0491288	1.43857e+07	838497	484106	5.8287	1.4884e+07	3.09099e+06	1.78458e+06	20.7672	0.879869	0.182834	0.182601	0.0964327	C12H4Cl2F6N4OS	Phenylpyrazoles	ZOCSXAVNDGMNBV-UHFFFAOYSA-N	NC1=C(C(=NN1C1=C(Cl)C=C(C=C1Cl)C(F)(F)F)C#N)S(=O)C(F)(F)F	C11099	---	HMDB0252265	Organoheterocyclic compounds	Azoles	NoSig
NEG8030	9,12,13-TriHOME	10.649	329.234	[M-H]-	329.233	True	1.86622e+07	2.12094e+07	1.65446e+07	6.68902e+07	7.24844e+07	8.13974e+07	0.000246632	0.255541	-1.96837	7.35906e+07	7.3166e+06	4.22424e+06	9.94229	1.88054e+07	2.33568e+06	1.34851e+06	12.4203	0.0021874	1.34975	1.34981	3.60795	C18H34O5	Fatty Acyls	MDIUMSLCYIJBQC-MVFSOIOZSA-N	CCCCC[C@H](O)[C@@H](O)\C=C\[C@@H](O)CCCCCCCC(O)=O	C14833	9858729	HMDB0004708	Lipids and lipid-like molecules	Fatty Acyls	DOWN
POS47	Methylene-imidazole	13.403	81.0453	[M+H]+	81.0447	True	7.00676e+08	1.28647e+09	9.58096e+08	4.39495e+08	5.69168e+08	1.13918e+09	0.386496	1.37126	0.455497	7.15949e+08	3.72222e+08	2.14903e+08	51.9901	9.81749e+08	2.93615e+08	1.69518e+08	29.9073	0.537925	0.597499	0.597243	0.412855	C4H4N2	Organooxygen compounds	UQOCEEQQGFOLRM-UHFFFAOYSA-N	C=C1N=CC=N1	---	21951823	HMDB0254636	Organic oxygen compounds	Organooxygen compounds	NoSig
POS3472	1-Carboxyethylphenylalanine	8.76	238.107	[M+Na]+	238.108	True	8.76497e+06	8.85219e+06	8.64673e+06	7.41141e+06	8.83907e+06	7.69444e+06	0.154132	1.09685	0.133361	7.98164e+06	755924	436433	9.47078	8.75463e+06	103121	59536.8	1.1779	0.271789	0.901302	0.901852	0.812107	C12H15NO4	Carboxylic acids and derivatives	MSBSJGQKNVMMQB-SCZZXKLOSA-N	C[C@@H](N[C@@H](CC1=CC=CC=C1)C(O)=O)C(O)=O	---	127261991	HMDB0240628	Organic acids and derivatives	Carboxylic acids and derivatives	NoSig
POS2178	Phosphocholine	12.195	184.073	[M+H]+	184.073	True	6.71073e+07	5.85114e+07	2.32836e+08	6.26041e+07	1.29632e+08	7.88182e+07	0.653807	1.32245	0.40321	9.03513e+07	3.49704e+07	2.01902e+07	38.705	1.19485e+08	9.82588e+07	5.67297e+07	82.2354	0.766749	0.32132	0.32151	0.18455	C5H14NO4P	Cholines	YHHSONZFOIEMCP-UHFFFAOYSA-N	O=P([O-])(O)OCC[N+](C)(C)C	C00588	---	HMDB0001565	Organic nitrogen compounds	Organonitrogen compounds	NoSig
POS957	3-Methylene-indolenine	7.182	130.065	[M+CH3OH+H]+	130.066	True	1.09802e+08	1.24584e+08	1.20484e+08	9.99729e+07	1.09531e+08	1.08687e+08	0.0847451	1.11528	0.157402	1.06064e+08	5.29157e+06	3.05509e+06	4.98905	1.1829e+08	7.63135e+06	4.40596e+06	6.45138	0.166182	1.02782	1.02803	1.07189	C9H7N	Indoles and derivatives	BCNUXXXHEIUHJB-UHFFFAOYSA-N	C=C1C=NC2=CC=CC=C12	---	170404	HMDB0011664	Organoheterocyclic compounds	Indoles and derivatives	NoSig
NEG7594	12-HEPE	12.389	317.213	[M-H]-	317.212	True	6.0368e+07	6.17099e+07	8.21503e+07	1.85705e+08	2.39554e+08	2.63565e+08	0.00256818	0.296488	-1.75395	2.29608e+08	3.98715e+07	2.30198e+07	17.365	6.80761e+07	1.22071e+07	7.04778e+06	17.9316	0.0106139	1.31037	1.31041	2.59037	C20H30O3	Very long-chain fatty acids	MCRJLMXYVFDXLS-QGQBRVLBSA-N	C(\CC)=C\C/C=C\C[C@@H](/C=C/C=C\C/C=C\CCCC(=O)O)O	---	5283191	HMDB0010202	Lipids and lipid-like molecules	Fatty Acyls	DOWN
NEG5215	Palmitic acid	11.554	255.233	[M-H]-	255.233	True	2.33907e+07	2.24671e+07	2.26299e+07	2.22969e+07	1.55678e+07	2.28237e+07	0.331221	1.12851	0.174421	2.02295e+07	4.0457e+06	2.33579e+06	19.999	2.28292e+07	493019	284645	2.1596	0.477649	0.661912	0.661181	0.479882	C16H32O2	Long-chain fatty acids	IPCSVZSSVZVIGE-UHFFFAOYSA-N	CCCCCCCCCCCCCCCC(O)=O	C00249	985;135369651	HMDB0000220	Lipids and lipid-like molecules	Fatty Acyls	NoSig
NEG5826	2-Hydroxyhexadecanoic acid	13.461	271.228	[M-H2O-H]-	271.227	True	1.36383e+09	1386255241	1.49882e+09	1.34405e+09	1.343e+09	1.12022e+09	0.159655	1.116	0.158333	1.26909e+09	1.28926e+08	7.44353e+07	10.1589	1.4163e+09	7.23342e+07	4.17621e+07	5.10725	0.277523	0.892557	0.893008	0.796817	C16H32O3	Fatty Acyls	JGHSBPIZNUXPLA-HNNXBMFYSA-N	CCCCCCCCCCCCCC[C@H](O)C(O)=O	---	12575964	HMDB0031057	Lipids and lipid-like molecules	Fatty Acyls	NoSig
NEG5744	3-Oxohexadecanoic acid	12.946	269.212	[M-H]-	269.212	True	1.25005e+08	1.11548e+08	1.21287e+08	7.89145e+07	9.95937e+07	9.43071e+07	0.0185138	1.31165	0.391386	9.09384e+07	1.07433e+07	6.20265e+06	11.8138	1.1928e+08	6.94914e+06	4.01209e+06	5.82592	0.0497226	1.21246	1.21252	1.73251	C16H30O3	Fatty Acyls	ASICPMTWQSESKX-UHFFFAOYSA-N	CCCCCCCCCCCCCC(=O)CC(O)=O	---	5282997	HMDB0010733	Lipids and lipid-like molecules	Fatty Acyls	UP
POS1086	m-Toluamide	4.519	136.076	[M+CH3OH+H]+	136.076	True	3.90197e+09	3.14091e+09	2.07985e+09	5.17199e+09	4.84214e+09	3.4962e+09	0.117881	0.675241	-0.566526	4.50344e+09	8.87756e+08	5.12546e+08	19.7128	3.04091e+09	9.1517e+08	5.28373e+08	30.0953	0.216395	0.963915	0.963678	0.928555	C8H9NO	Benzene and substituted derivatives	WGRPQCFFBRDZFV-UHFFFAOYSA-N	CC1=CC=CC(=C1)C(N)=O	---	69253	HMDB0245928	Benzenoids	Benzene and substituted derivatives	NoSig
POS5542	(2E,6E,8E)-Decatrienoylcarnitine	9.257	310.201	[M+Na]+	310.202	True	4.53557e+07	4.9104e+07	4.78316e+07	1.91954e+07	2.20376e+07	1.7758e+07	7.68213e-05	2.41209	1.27028	1.96637e+07	2.17788e+06	1.2574e+06	11.0756	4.74304e+07	1.90604e+06	1.10045e+06	4.0186	0.00113103	1.35749	1.35759	4.11452	C17H27NO4	Fatty Acyls	WQZGVBGHYLRJAV-UHFFFAOYSA-N	CC=CC=CCCC=CC(=O)OC(CC([O-])=O)C[N+](C)(C)C	---	---	HMDB0241125	Lipids and lipid-like molecules	Fatty Acyls	UP
POS3453	Palmitoleic acid	11.948	237.221	[M+H-H2O]+	237.222	True	3309.03	5.75042e+07	4.2607e+07	3309.03	4.093e+07	3.81471e+07	0.762869	1.26598	0.340259	2.63601e+07	2.2868e+07	1.32029e+07	86.7524	3.33715e+07	2.98422e+07	1.72294e+07	89.4243	0.853686	0.217717	0.218013	0.11755	C16H30O2	Long-chain fatty acids	SECPZKHBENQXJG-BQYQJAHWSA-N	CCCCCC/C=C\CCCCCCCC(=O)O	C08362	445638	HMDB0003229	Lipids and lipid-like molecules	Fatty Acyls	NoSig
POS3930	(Z)-4',6-Dihydroxyaurone	9.546	255.065	[M+H]+	255.066	True	5.0959e+06	3.76978e+06	5.08609e+06	5.83807e+06	6.22161e+06	3.72939e+06	0.529724	0.883634	-0.178479	5.26302e+06	1.34194e+06	774767	25.4974	4.65059e+06	762823	440416	16.4027	0.671496	0.444836	0.444339	0.275951	C15H10O4	Aurone flavonoids	KEZLDSPIRVZOKZ-AUWJEWJLSA-N	OC1=CC=C(\C=C2/OC3=C(C=CC(O)=C3)C2=O)C=C1	C08644	5281254	HMDB0033153	Phenylpropanoids and polyketides	Aurone flavonoids	NoSig
NEG2380	3-Methylpimelic acid	8.458	173.081	[M-H]-	173.081	True	7.63613e+07	7.30793e+07	7.64145e+07	1.77494e+08	1.9366e+08	1.96278e+08	4.4724e-05	0.39803	-1.32905	1.89144e+08	1.01738e+07	5.87387e+06	5.37888	7.5285e+07	1.91041e+06	1.10298e+06	2.53758	0.000780753	1.3599	1.35991	4.34946	C8H14O4	Fatty Acyls	NXDCNRPLRGMKHU-UHFFFAOYSA-N	CC(CCCC(O)=O)CC(O)=O	---	21510350	HMDB0059757	Lipids and lipid-like molecules	Fatty Acyls	DOWN
POS22095	PC(16:0/18:2)	12.451	758.569	[M+H]+	758.569	True	5.94216e+09	3.58072e+09	5.88784e+09	4.84899e+09	8.56843e+09	1.06716e+10	0.197122	0.639741	-0.644441	8.02967e+09	2.94845e+09	1.70229e+09	36.7195	5.1369e+09	1.34797e+09	7.78249e+08	26.2409	0.323768	0.835872	0.836092	0.705264	C42H80NO8P	Phosphatidylcholines	JLPULHDHAOZNQI-AKMCNLDWSA-N	CCCCCCCCCCCCCCCC(=O)OC[C@H](COP(=O)([O-])OCC[N+](C)(C)C)OC(=O)CCCCCCC/C=C\C/C=C\CCCCC	---	5287971	HMDB0007973	Lipids and lipid-like molecules	Glycerophospholipids	NoSig
NEG6207	Oleic acid	13.424	281.248	[M-H]-	281.249	True	261096	3.15081e+07	3.78764e+07	127611	4.34769e+07	3.76206e+07	0.8396	0.85744	-0.221893	2.7075e+07	2.35201e+07	1.35794e+07	86.8702	2.32152e+07	2.01322e+07	1.16234e+07	86.7201	0.906353	0.147072	0.146783	0.0759276	C18H34O2	Long-chain fatty acids	ZQPPMHVWECSIRJ-KTKRTIGZSA-N	CCCCCCCC\C=C/CCCCCCCC(O)=O	C00712	445639	HMDB0000207	Lipids and lipid-like molecules	Fatty Acyls	NoSig
NEG1715	Xanthine	3.702	151.025	[M-H]-	151.026	True	2.07822e+10	1.94824e+10	1.98629e+10	9.84147e+09	2.05664e+10	2.12363e+10	0.488606	1.16426	0.219418	1.72147e+10	6.3942e+09	3.69169e+09	37.1438	2.00425e+10	6.68267e+08	3.85824e+08	3.33426	0.632496	0.486696	0.486739	0.311041	C5H4N4O2	Xanthines	LRFVTYWOQMYALW-JKKKRHIMNA-N	OC=1N=C(O)C=2N=CNC2N1	C00385	1188	HMDB0000292	Organoheterocyclic compounds	Imidazopyrimidines	NoSig
POS550	Betazole	1.094	112.087	[M+NH4]+	112.087	True	1.47175e+09	1.53184e+09	1.53793e+09	1.38982e+09	1.66334e+09	1.53115e+09	0.869966	0.990666	-0.013529	1.5281e+09	1.36786e+08	7.89732e+07	8.95134	1.51384e+09	3.65741e+07	2.11161e+07	2.41599	0.92735	0.119382	0.118836	0.0604976	C5H9N3	Organonitrogen compounds	JXDFEQONERDKSS-UHFFFAOYSA-N	NCCC1=CC=NN1	---	7741	HMDB0014417	Organic nitrogen compounds	Organonitrogen compounds	NoSig
NEG6831	Auraptene	11.973	297.153	[M-H]-	297.15	True	1.4117e+08	6.97935e+07	3.87744e+07	6.36126e+07	1.06362e+08	1.71256e+08	0.522502	0.731874	-0.450334	1.13744e+08	5.42001e+07	3.12924e+07	47.6511	8.32459e+07	5.25065e+07	3.03146e+07	63.074	0.665102	0.451328	0.451713	0.281912	C19H22O3	Terpene lactones	RSDDHGSKLOSQFK-RVDMUPIBSA-N	O=C1OC=2C=C(OCC=C(C)CCC=C(C)C)C=CC2C=C1	---	1550607	HMDB0034054	Lipids and lipid-like molecules	Prenol lipids	NoSig
POS1381	D-Lysine	1.134	147.113	[M+NH4]+	147.113	True	1.1257e+09	1.10359e+09	1.14586e+09	1.30997e+09	1.46968e+09	1.38805e+09	0.00519434	0.809834	-0.304301	1.38924e+09	7.98606e+07	4.61075e+07	5.74852	1.12505e+09	2.11463e+07	1.22088e+07	1.87959	0.0180326	1.28627	1.28611	2.28447	C6H14N2O2	Carboxylic acids and derivatives	KDXKERNSBIXSRK-RXMQYKEDSA-N	NCCCC[C@@H](N)C(O)=O	C00739	57449	HMDB0003405	Organic acids and derivatives	Carboxylic acids and derivatives	DOWN
POS5182	Methylthioadenosine	7.046	298.097	[M+H]+	298.097	True	4.38302e+08	4.70734e+08	4.66283e+08	1.4632e+08	1.40764e+08	1.5412e+08	8.82257e-06	3.1172	1.64025	1.47068e+08	6.70935e+06	3.87365e+06	4.56208	4.5844e+08	1.75816e+07	1.01507e+07	3.83509	0.000359373	1.36407	1.36406	5.05441	C11H15N5O3S	5'-deoxy-5'-thionucleosides	WUUGFSXJNOTRMR-IOSLPCCCSA-N	OC1C(O)C(OC1N2C=NC=3C(=NC=NC32)N)CSC	C00170	439176	HMDB0001173	Nucleosides, nucleotides, and analogues	5'-deoxyribonucleosides	UP
POS1048	Aspartate	1.31	134.045	[M+H]+	134.045	True	2.61597e+08	2.59857e+08	1.35742e+08	3.13719e+08	3.39486e+08	3.5071e+08	0.0550693	0.654633	-0.611241	3.34638e+08	1.89658e+07	1.09499e+07	5.66754	2.19065e+08	7.21654e+07	4.16647e+07	32.9424	0.117238	1.09626	1.09627	1.25909	C4H7NO4	Amino acids and derivatives	CKLJMWTZIZZHCS-REOHCLBHSA-N	C([C@@H](C(=O)O)N)C(=O)O	C00049	5960;44367445;139060126	HMDB0000191	Organic acids and derivatives	Carboxylic acids and derivatives	NoSig
NEG6232	Guanosine	6.683	282.084	[M-H]-	282.084	True	2.14863e+08	2.0114e+08	1.83959e+08	2.41307e+07	6.28743e+07	6.51044e+07	0.000739311	3.94428	1.97976	5.07031e+07	2.30394e+07	1.33018e+07	45.4398	1.99987e+08	1.54841e+07	8.93977e+06	7.74256	0.00433608	1.33691	1.33691	3.13117	C10H13N5O5	Purine nucleosides	NYHBQMYGNKIUIF-BUDDTFTENA-N	N=C1N=C(O)C=2N=CN(C2N1)C3OC(CO)C(O)C3O	C00387	135398635	HMDB0000133	Nucleosides, nucleotides, and analogues	Purine nucleosides	UP
POS1965	Bicifadine	12.327	174.128	[M+CH3OH+H]+	174.128	True	1.28814e+07	2.01973e+07	8.08101e+06	1.70375e+07	1.4773e+07	1.24898e+07	0.794461	0.929108	-0.106081	1.47667e+07	2.27388e+06	1.31282e+06	15.3987	1.37199e+07	6.10151e+06	3.52271e+06	44.472	0.876773	0.188844	0.188562	0.0999274	C12H15N	Piperidines	OFYVIGTWSQPCLF-UHFFFAOYSA-N	CC1=CC=C(C=C1)C12CC1CNC2	---	47953	HMDB0249183	Organoheterocyclic compounds	Piperidines	NoSig
POS2545	N-Methyldodecylamine	10.5	200.237	[M+H]+	200.237	True	8.09028e+07	7.6672e+07	7.45887e+07	1.2364e+08	1.20638e+08	1.11371e+08	0.00057121	0.652788	-0.615313	1.1855e+08	6.39578e+06	3.6926e+06	5.39502	7.73878e+07	3.21735e+06	1.85754e+06	4.15744	0.00365455	1.34069	1.34061	3.2432	C13H29N	Secondary amines	OMEMQVZNTDHENJ-UHFFFAOYSA-N	CCCCCCCCCCCCNC	---	81746	---	Organic nitrogen compounds	Organonitrogen compounds	DOWN
POS2469	Arginine	1.262	197.101	[M+Na]+	197.101	True	3.38192e+08	3.17732e+08	4.47243e+08	3.89536e+08	3.76437e+08	3.66747e+08	0.820799	0.973909	-0.0381413	3.77573e+08	1.14367e+07	6.60297e+06	3.02899	3.67722e+08	6.96228e+07	4.01967e+07	18.9335	0.893954	0.16412	0.164146	0.0857631	C6H14N4O2	Amino acids and derivatives	ODKSFYDXXFIFQN-UHFFFAOYSA-N	N=C(N)NCCC[C@H](N)C(=O)O	C00062	6322;28782	HMDB0000517	Organic acids and derivatives	Carboxylic acids and derivatives	NoSig
POS2384	S-Adenosylhomocysteine	6.694	193.068	[M+2H]+	193.068	True	3.78494e+08	4.0866e+08	4.25572e+08	2.1796e+08	2.36166e+08	2.43902e+08	0.000405247	1.73736	0.796897	2.32676e+08	1.33188e+07	7.68963e+06	5.72419	4.04242e+08	2.3848e+07	1.37686e+07	5.89942	0.00287773	1.34483	1.34485	3.39228	C14H20N6O5S	Gamma butyrolactones	ZJUKTBDSGOFHSH-UHFFFAOYSA-N	C1=NC(=C2C(=N1)N(C=N2)[C@H]3[C@@H]([C@@H]([C@H](O3)CSCC[C@@H](C(=O)O)N)O)O)N	C00021	439155	HMDB0000939	Organoheterocyclic compounds	Lactones	UP
NEG4771	Cytidine	2.061	242.078	[M-H]-	242.078	True	2.64101e+08	2.43876e+08	2.33309e+08	1.91836e+08	2.30504e+08	2.47349e+08	0.272073	1.10691	0.146539	2.2323e+08	2.84627e+07	1.64329e+07	12.7504	2.47095e+08	1.56461e+07	9.0333e+06	6.33203	0.411986	0.734261	0.734098	0.565315	C9H13N3O5	Pyrimidine nucleosides	UHDGCWIWMRVCDJ-XVFCMESISA-N	N=C1N=C(O)N(C=C1)C2OC(CO)C(O)C2O	C00475	6175	HMDB0000089	Nucleosides, nucleotides, and analogues	Pyrimidine nucleosides	NoSig
NEG4276	Dodecanedioic acid	10.569	229.144	[M-H]-	229.145	True	2.46006e+07	2.61596e+07	2.868e+07	3.64063e+07	3.8554e+07	4.28202e+07	0.00457758	0.674476	-0.568161	3.92601e+07	3.26473e+06	1.88489e+06	8.31563	2.648e+07	2.05849e+06	1.18847e+06	7.77375	0.0163562	1.29102	1.29113	2.33936	C12H22O4	Medium-chain fatty acids	TVIDDXQYHWJXFK-UHFFFAOYSA-N	OC(=O)CCCCCCCCCCC(O)=O	C02678	12736	HMDB0000623	Lipids and lipid-like molecules	Fatty Acyls	DOWN
NEG3114	DOPA	3.956	196.061	[M-H]-	196.062	True	5.86423e+07	6.11248e+07	7.07073e+07	6.41379e+07	7.03177e+07	7.77263e+07	0.249941	0.897694	-0.155705	7.07273e+07	6.80348e+06	3.92799e+06	9.61932	6.34915e+07	6.37116e+06	3.67839e+06	10.0347	0.383221	0.762699	0.762906	0.602163	C9H11NO4	Amino acids and derivatives	WTDRDQBEARUVNC-LURJTMIESA-N	C1=CC(=C(C=C1CC(C(=O)O)N)O)O	C00355	836	HMDB0000181	Organic acids and derivatives	Carboxylic acids and derivatives	NoSig
POS22734	PC(16:0/18:1)	11.757	782.566	[M+Na]+	782.567	True	1.57871e+08	2.18547e+08	2.69332e+08	1.21756e+08	1.20377e+08	3.40008e+08	0.803546	1.10927	0.149606	1.94047e+08	1.26408e+08	7.29815e+07	65.1428	2.1525e+08	5.58034e+07	3.22181e+07	25.9249	0.879869	0.180694	0.180127	0.0949892	C42H82NO8P	Phosphatidylcholines	WTJKGGKOPKCXLL-VYOBOKEXSA-N	CCCCCCCCCCCCCCCC(=O)OC[C@H](COP(=O)([O-])OCC[N+](C)(C)C)OC(=O)CCCCCCC/C=C\CCCCCCCC	---	5497103	HMDB0007972	Lipids and lipid-like molecules	Glycerophospholipids	NoSig
POS12330	LPC(18:1)	12.65	522.356	[M+H]+	522.356	True	2.17993e+08	2.4047e+08	2.29208e+08	2.45298e+08	2.21621e+08	2.1988e+08	0.979176	1.00127	0.00182844	2.28933e+08	1.41993e+07	8.19796e+06	6.20237	2.29224e+08	1.12385e+07	6.48854e+06	4.90285	0.993815	0.01887	0.0189838	0.00913907	C26H52NO7P	Glycerophospholipids	PZRFVAHZNWPPAC-VBKSFVIKSA-N	CCCCCC\C=C/CCCCCCCCCC(=O)OC[C@@]([H])(O)COP([O-])(=O)OCC[N+](C)(C)C	---	53480465	HMDB0010385	Lipids and lipid-like molecules	Glycerophospholipids	NoSig
NEG1285	Hypoxanthine	2.896	135.03	[M-H]-	135.031	True	8.05952e+09	6.27484e+09	8.26223e+09	7.9338e+09	1.06817e+10	9.44126e+09	0.147357	0.805389	-0.312242	9.35224e+09	1.3761e+09	7.94491e+08	14.7141	7.5322e+09	1.09361e+09	6.31394e+08	14.5191	0.260972	0.913063	0.912888	0.831629	C5H4N4O	Purinones	FDGQSTZJBFJUBT-UHFFFAOYSA-N	C1=NC2=C(N1)C(=O)NC=N2	C00262	135398638	HMDB0000157	Organoheterocyclic compounds	Imidazopyrimidines	NoSig
NEG1345	Urocanic acid	2.256	137.034	[M-H]-	137.036	True	1.5836e+09	1.42861e+09	1.45628e+09	2.00869e+09	2.13687e+09	2.85735e+09	0.0345977	0.638092	-0.648164	2.3343e+09	4.57485e+08	2.64129e+08	19.5984	1.4895e+09	8.26609e+07	4.77243e+07	5.54958	0.0808383	1.15376	1.1541	1.46095	C6H6N2O2	Substituted imidazoles	LOIYMIARKYCTBW-OWOJBTEDSA-N	C1=C(NC=N1)C=CC(=O)O	C00785	---	HMDB0000301	Organoheterocyclic compounds	Azoles	DOWN
POS6646	dGMP	2.966	348.07	[M+H]+	348.07	True	2.69277e+08	2.78685e+08	2.47377e+08	7.52568e+07	4.0093e+07	1.50149e+07	0.000361126	6.10087	2.60902	4.34549e+07	3.02613e+07	1.74714e+07	69.6385	2.65113e+08	1.60643e+07	9.27473e+06	6.05942	0.00267452	1.34606	1.34611	3.44234	C10H14N5O7P	Purine deoxyribonucleoside monophosphates	LTFMZDNNPPEQNG-KVQBGUIXSA-N	O=P(O)(O)OCC1OC(N2C=NC=3C(O)=NC(=N)NC32)CC1O	C00362	135398597	HMDB0001044	Nucleosides, nucleotides, and analogues	Purine nucleotides	UP
POS1837	3-Acetyl-4-hydroxy-6-methyl-2H-pyran-2-one	10.136	169.05	[2M+H]+	169.05	True	863216	667680	383788	546756	540192	391721	0.38198	1.29487	0.372808	492890	87676.2	50619.9	17.7882	638228	241067	139180	37.7713	0.533462	0.602208	0.602341	0.41796	C8H8O4	Organooxygen compounds	PKLPQOJFHFGVBS-UHFFFAOYSA-N	CC(=O)C1=C(O)C=C(C)OC1=O	C02543	54678494	HMDB0033129	Organic oxygen compounds	Organooxygen compounds	NoSig
NEG3322	Dinotefuran	7.324	201.099	[M-H]-	201.099	True	1.39096e+06	1.47975e+06	1.26361e+06	1.24087e+06	1.19402e+06	1.12846e+06	0.0545269	1.16023	0.214415	1.18778e+06	56467	32601.3	4.75398	1.37811e+06	108643	62724.9	7.88347	0.116286	1.09748	1.09766	1.26339	C7H14N4O3	Nitroguanidines	YKBZOVFACRVRJN-UHFFFAOYSA-N	CNC(NCC1CCOC1)=N[N+]([O-])=O	C18509	197701;86287520;135418283;135779803	HMDB0244741	Organic nitrogen compounds	Organonitrogen compounds	NoSig
POS1376	1,3-Dimethylpyrrolo[1,2-a]pyrazine	12.486	147.092	[M+H]+	147.092	True	1.48241e+08	1.46257e+08	1.66227e+08	1.48587e+08	1.40029e+08	172358684	0.994595	0.999457	-0.000783063	1.53658e+08	1.67507e+07	9.67102e+06	10.9013	1.53575e+08	1.1002e+07	6.35201e+06	7.16393	0.997043	0.00423911	0.0049268	0.00235356	C9H10N2	Pyrrolopyrazines	OZKVDBMWPNGAHE-UHFFFAOYSA-N	CC1=CN2C=CC=C2C(C)=N1	---	12382419	HMDB0030908	Organoheterocyclic compounds	Pyrrolopyrazines	NoSig
POS6021	Tris(2-chloroisopropyl)phosphate	11.688	327.008	[M+H]+	327.008	True	5.4356e+08	5.77125e+08	6.20636e+08	6.42396e+08	7.09139e+08	7.13224e+08	0.0281049	0.843353	-0.245792	6.88253e+08	3.97657e+07	2.29587e+07	5.77777	5.8044e+08	3.86449e+07	2.23117e+07	6.65786	0.0691029	1.17574	1.17568	1.55122	C9H18Cl3O4P	Alkyl phosphates	KVMPUXDNESXNOH-UHFFFAOYSA-N	CC(CCl)OP(=O)(OC(C)CCl)OC(C)CCl	---	26176	---	Organic acids and derivatives	Organic phosphoric acids and derivatives	DOWN
NEG630	2-Furancarboximidamide	12.028	109.039	[M-H]-	109.041	True	3.78115e+08	6.39296e+08	5.7912e+08	3.61037e+08	1.94458e+08	4.76142e+08	0.172961	1.54757	0.630005	3.43879e+08	1.41624e+08	8.17666e+07	41.1842	5.32177e+08	1.36772e+08	7.89654e+07	25.7005	0.295606	0.872558	0.872215	0.762052	C5H6N2O	Heteroaromatic compounds	FUVVSNUVSKUJAS-UHFFFAOYSA-N	NC(=N)C1=CC=CO1	---	3028399	HMDB0245134	Organoheterocyclic compounds	Heteroaromatic compounds	NoSig
NEG672	3-Hydroxy-2H-pyran-2-one	2.536	111.007	[M-H]-	111.008	True	3.81999e+08	3.52943e+08	5.42384e+08	1.52047e+08	2.13628e+08	2.43861e+08	0.0264161	2.09557	1.06734	2.03179e+08	4.67901e+07	2.70143e+07	23.029	4.25775e+08	1.02026e+08	5.89047e+07	23.9624	0.0661484	1.18173	1.18167	1.57813	C5H4O3	Pyrans	LIPRKYKMVQPYPG-UHFFFAOYSA-N	OC1=CC=COC1=O	---	68130	HMDB0032994	Organoheterocyclic compounds	Pyrans	UP
NEG7971	2',3'-Cyclic AMP	5.365	328.045	[M-H]-	328.045	True	8.49457e+06	7.64441e+06	1.27332e+07	4.81446e+06	2.77282e+06	7.96977e+06	0.111718	1.85589	0.892111	5.18569e+06	2.61829e+06	1.51167e+06	50.4907	9.62406e+06	2.72594e+06	1.57382e+06	28.3242	0.206847	0.97541	0.974973	0.951878	C10H12N5O6P	2',3'-cyclic purine nucleotides	KMYWVDDIPVNLME-UHFFFAOYSA-N	Nc1ncnc2c1ncn2[C@@H]1O[C@H](CO)[C@H]2OP(=O)(O)O[C@H]21	C02353	101812	HMDB0011616	Organic oxygen compounds	Organooxygen compounds	NoSig
POS598	Creatine	1.75	114.066	[M+H-H2O]+	114.066	True	1.37379e+09	1.16984e+09	1.26949e+09	1.34621e+09	1.28907e+09	1.65255e+09	0.2817	0.88929	-0.169274	1.42927e+09	1.95458e+08	1.12848e+08	13.6753	1.27104e+09	1.01984e+08	5.88803e+07	8.02365	0.422377	0.721184	0.72185	0.550213	C4H9N3O2	Amino acids and derivatives	CVSVTCORWBXHQV-UHFFFAOYSA-N	CN(CC(=O)O)C(=N)N	C00300	586	HMDB0000064	Organic acids and derivatives	Carboxylic acids and derivatives	NoSig
POS4647	Dibutyl phthalate	12.8	279.159	[M+H]+	279.159	True	5.23837e+08	6.81774e+08	6.20611e+08	5.78491e+08	7.08017e+08	7.21636e+08	0.402124	0.909408	-0.137001	6.69381e+08	7.90072e+07	4.56148e+07	11.803	6.08741e+08	7.9635e+07	4.59773e+07	13.0819	0.55213	0.579953	0.579758	0.39564	C16H22O4	Benzoic acid esters	DOIRQSBPFJWKBE-UHFFFAOYSA-N	CCCCOC(=O)c1ccccc1C(=O)OCCCC	C14214	3026	HMDB0033244	Benzenoids	Benzene and substituted derivatives	NoSig
POS5104	gamma-Glutamylphenylalanine	7.369	295.129	[M+H]+	295.129	True	1.51279e+08	1.4897e+08	1.54178e+08	9.58728e+07	1.08397e+08	1.17425e+08	0.00233478	1.4126	0.498355	1.07232e+08	1.08233e+07	6.24882e+06	10.0934	1.51476e+08	2.60979e+06	1.50676e+06	1.72291	0.0100384	1.31315	1.31307	2.63175	C14H18N2O5	Peptides	XHHOHZPNYFQJKL-QWRGUYRKSA-N	O=C(O)[C@H](CC1=CC=CC=C1)NC(CC[C@H](N)C(O)=O)=O	---	111299	HMDB0000594	Organic acids and derivatives	Carboxylic acids and derivatives	UP
NEG8584	3',5'-Cyclic GMP	6.689	344.039	[M-H]-	344.04	True	1.24514e+07	1.37726e+07	1.03964e+07	2.85013e+07	3.14659e+07	3.63792e+07	0.0013439	0.38009	-1.39559	3.21155e+07	3.97892e+06	2.29723e+06	12.3894	1.22068e+07	1.70131e+06	982254	13.9375	0.00663607	1.32616	1.32625	2.87163	C10H12N5O7P	3',5'-cyclic purine nucleotides	ZOOGRGPOEVQQDX-UUOKFMHZSA-N	O=P1(O)OCC2OC(N3C=NC=4C(O)=NC(=N)NC43)C(O)C2O1	C00942	135398570	HMDB0001314	Nucleosides, nucleotides, and analogues	Purine nucleotides	DOWN
POS2004	N-Acetylaspartic acid	2.515	176.055	[M+H]+	176.055	True	5.48745e+08	5.27596e+08	5.17111e+08	4.09032e+08	4.10171e+08	4.30817e+08	0.000609562	1.27474	0.350204	4.16674e+08	1.22618e+07	7.07936e+06	2.94279	5.31151e+08	1.6114e+07	9.3034e+06	3.03378	0.00377745	1.33983	1.33972	3.21498	C6H9NO5	Amino acids and derivatives	OTCCIMWXFLJLIA-BYPYZUCNSA-N	O=C(O)CC(N=C(O)C)C(=O)O	C01042	97508	HMDB0000812	Organic acids and derivatives	Carboxylic acids and derivatives	UP
NEG520	(S)-3-Hydroxybutyric acid	3.645	103.039	[M-H]-	103.04	True	1.92547e+08	1.90098e+08	1.83245e+08	1.38223e+08	1.40562e+08	1.55615e+08	0.00201132	1.3027	0.3815	1.448e+08	9.43908e+06	5.44966e+06	6.5187	1.8863e+08	4.82162e+06	2.78376e+06	2.55612	0.00887303	1.31715	1.317	2.69652	C4H8O3	Hydroxy acids and derivatives	WHBMMWSBFZVSSR-VKHMYHEASA-N	C[C@H](O)CC(O)=O	C03197	94318	HMDB0000442	Organic acids and derivatives	Hydroxy acids and derivatives	UP
POS691	3-Amino-2,2-dimethylpropanoic acid	9.013	118.086	[M+NH4]+	118.086	True	4.36286e+07	5.2569e+07	6.41816e+07	3.46864e+07	3.33166e+07	5.98089e+07	0.358251	1.25481	0.327465	4.2604e+07	1.49156e+07	8.61153e+06	35.0099	5.34597e+07	1.03054e+07	5.94983e+06	19.277	0.510831	0.629944	0.629478	0.445813	C5H11NO2	Carboxylic acids and derivatives	DGNHGRLDBKAPEH-UHFFFAOYSA-N	CC(C)(CN)C(O)=O	---	95739;36689718	HMDB0245805	Organic acids and derivatives	Carboxylic acids and derivatives	NoSig
POS2881	N,N-Dimethyldodecylamine	10.622	214.253	[M+H]+	214.253	True	2.12387e+07	1.92056e+07	2.20468e+07	2.73189e+07	2.55655e+07	2.70413e+07	0.00444627	0.781864	-0.35501	2.66419e+07	942452	544125	3.53748	2.08304e+07	1.46394e+06	845207	7.02793	0.0161707	1.29206	1.29224	2.352	C14H31N	Tertiary amines	YWFWDNVOPHGWMX-UHFFFAOYSA-N	CCCCCCCCCCCCN(C)C	---	8168	HMDB0255262	Organic nitrogen compounds	Organonitrogen compounds	DOWN
POS634	Ornithine	1.408	115.087	[M+H-H2O]+	115.087	True	1.58477e+08	2.5925e+08	1.911e+08	1.91733e+08	3.64965e+08	4.56318e+08	0.180165	0.601005	-0.734552	3.37672e+08	1.34387e+08	7.75886e+07	39.7982	2.02942e+08	5.14193e+07	2.9687e+07	25.3369	0.303671	0.861181	0.861237	0.744329	C5H12N2O2	Amino acids and derivatives	AHLPHDHHMVZTML-BYPYZUCNSA-N	NCCC[C@H](N)C(=O)O	C00077	---	HMDB0000214	Organic acids and derivatives	Carboxylic acids and derivatives	NoSig
POS1368	1H-Indene-1,2(3H)-dione	4.148	147.044	[M+H-H2O]+	147.044	True	3.45402e+08	1.77661e+08	3.49363e+08	1.64323e+08	2.54978e+08	2.99163e+08	0.499001	1.21429	0.280119	2.39488e+08	6.87413e+07	3.96878e+07	28.7035	2.90809e+08	9.80086e+07	5.65853e+07	33.7021	0.64197	0.476195	0.475922	0.301898	C9H6O2	Indanes	WFFZGYRTVIPBFN-UHFFFAOYSA-N	O=C1CC2=CC=CC=C2C1=O	---	123358	HMDB0244733	Benzenoids	Indanes	NoSig
NEG330	3-Hydroxypyridazine	7.044	95.0236	[M-H2O-H]-	95.0251	True	2.56893e+07	2.07342e+07	1.99104e+07	4.86569e+07	2.66662e+07	4.52387e+07	0.0627722	0.550206	-0.861956	4.01873e+07	1.18336e+07	6.83216e+06	29.4463	2.21113e+07	3.12588e+06	1.80473e+06	14.137	0.130455	1.07674	1.07721	1.20223	C4H4N2O	Diazines	AAILEWXSEQLMNI-UHFFFAOYSA-N	O=C1NN=CC=C1	---	68153	HMDB0246116	Organoheterocyclic compounds	Diazines	NoSig
NEG979	Taurine	0.849	124.006	[M-H]-	124.007	True	6.60712e+09	6.02613e+09	6.71337e+09	5.50659e+09	5.6064e+09	5.32466e+09	0.0133157	1.17697	0.235077	5.47922e+09	1.42849e+08	8.24741e+07	2.60711	6.44887e+09	3.69944e+08	2.13587e+08	5.73656	0.0382864	1.23641	1.23644	1.87564	C2H7NO3S	Organosulfonic acids	XOAAWQZATWQOTB-JLSKMEETNA-N	O=S(=O)(O)CCN	C00245	1123	HMDB0000251	Organic acids and derivatives	Organic sulfonic acids and derivatives	UP
NEG8380	Canrenone	13.385	339.195	[M-H]-	339.197	True	2.97051e+08	1.51721e+08	6.60233e+07	1.93101e+08	3.77564e+07	1.15549e+08	0.526367	1.4861	0.571531	1.15469e+08	7.76725e+07	4.48442e+07	67.267	1.71598e+08	1.16789e+08	6.74284e+07	68.0598	0.668628	0.448151	0.447763	0.278711	C22H28O3	Steroid lactones	UJVLDDZCTMKXJK-AFDHUMPMSA-N	CC12CC[C@H]3C(C=CC4=CC(=O)CCC34C)[C@@H]1CCC21CCC(=O)O1	---	---	HMDB0003033	Lipids and lipid-like molecules	Steroids and steroid derivatives	NoSig
NEG1096	Pyrroline hydroxycarboxylate	0.916	128.034	[M-H]-	128.035	True	3.87765e+08	3.67834e+08	3.96725e+08	3.92027e+08	4.77244e+08	3.96768e+08	0.260397	0.910181	-0.135775	4.22013e+08	4.78899e+07	2.76492e+07	11.348	3.84108e+08	1.47888e+07	8.53834e+06	3.85018	0.396765	0.749748	0.749177	0.584364	C5H7NO3	Carboxylic acids and derivatives	WFOFKRKDDKGRIK-UHFFFAOYSA-N	[H][C@@]1(O)C[C@]([H])(N=C1)C(O)=O	C04281	11966267	HMDB0001369	Organic acids and derivatives	Carboxylic acids and derivatives	NoSig
NEG1929	N-Isovaleroylglycine	7.516	158.081	[M-H]-	158.082	True	5.62898e+07	5.89118e+07	5.67555e+07	5.01571e+07	5.02181e+07	5.222e+07	0.00360704	1.12688	0.172339	5.08651e+07	1.17378e+06	677681	2.30763	5.7319e+07	1.39892e+06	807664	2.44058	0.0137315	1.29984	1.29977	2.44285	C7H13NO3	Amino acids and derivatives	ZRQXMKMBBMNNQC-UHFFFAOYSA-N	O=C(O)CN=C(O)CC(C)C	---	546304	HMDB0000678	Organic acids and derivatives	Carboxylic acids and derivatives	UP
NEG6117	Aspartylphenylalanin	7.096	279.099	[M-H]-	279.099	True	2.28614e+07	2.01966e+07	1.9251e+07	6.27048e+06	7.64135e+06	8.4071e+06	0.000436005	2.79175	1.48117	7.43965e+06	1.0825e+06	624979	14.5504	2.07697e+07	1.87215e+06	1.08089e+06	9.01388	0.00306206	1.34405	1.344	3.36051	C13H16N2O5	Peptides	YZQCXOFQZKCETR-UHFFFAOYSA-N	O=C(O)CC(N)C(O)=NC(C(=O)O)CC=1C=CC=CC1	---	93078	HMDB0000706	Organic acids and derivatives	Carboxylic acids and derivatives	UP
NEG6753	(Z)-13-Oxo-9-octadecenoic acid	13.09	295.227	[M-H]-	295.227	True	1.59874e+08	1.44014e+08	1.34407e+08	1.07708e+08	1.23278e+08	1.15902e+08	0.0246726	1.26351	0.337432	1.15629e+08	7.7887e+06	4.49681e+06	6.73593	1.46098e+08	1.28607e+07	7.42515e+06	8.80281	0.0626817	1.18798	1.18805	1.60779	C18H32O3	Fatty Acyls	LDYZTLZOFONHNA-VQHVLOKHSA-N	CCCCCC(=O)CC\C=C\CCCCCCCC(O)=O	---	44612156	HMDB0029796	Lipids and lipid-like molecules	Fatty Acyls	UP
NEG2524	Hippuric acid	7.956	178.05	[M-H]-	178.051	True	1.95124e+08	2.14174e+08	2.17274e+08	1.83072e+08	1.81634e+08	1.93896e+08	0.0461106	1.12168	0.165661	1.86201e+08	6.70314e+06	3.87006e+06	3.59996	2.08858e+08	1.1994e+07	6.92473e+06	5.74266	0.101247	1.12018	1.12007	1.3362	C9H9NO3	Benzamides	QIAFMBKCNZACKA-UHFFFAOYSA-N	C1=CC=C(C=C1)C(=O)NCC(=O)O	C01586	---	HMDB0000714	Benzenoids	Benzene and substituted derivatives	UP
NEG4880	Glycerophosphoglycerol	0.93	245.043	[M-H]-	245.043	True	1.11149e+08	1.09119e+08	1.122e+08	7.14051e+07	8.35824e+07	7.66117e+07	0.000764789	1.43554	0.521589	7.71997e+07	6.10991e+06	3.52756e+06	7.91442	1.10823e+08	1.56616e+06	904223	1.41321	0.00442925	1.33628	1.33639	3.11646	C6H15O8P	Organic phosphoric acids and derivatives	LLCSXHMJULHSJN-OLQVQODUSA-N	OC[C@H](O)COP(O)(=O)OC[C@H](O)CO	C03274	54575349	HMDB0240316	Organic acids and derivatives	Organic phosphoric acids and derivatives	UP
POS891	1-Piperideine-2-carboxylic acid	6.614	128.071	[M+Na]+	128.071	True	4.68893e+07	4.23694e+07	4.90554e+07	8.20787e+07	7.54069e+07	7.4139e+07	0.000592659	0.597148	-0.743839	7.72082e+07	4.26533e+06	2.46259e+06	5.52445	4.61047e+07	3.41136e+06	1.96955e+06	7.39914	0.00371159	1.34009	1.34011	3.2272	C6H9NO2	Pyridines and derivatives	GEJXSVNGWOSZPC-UHFFFAOYSA-N	OC(=O)C1=NCCCC1	C04092	1194	HMDB0001084	Organoheterocyclic compounds	Pyridines and derivatives	DOWN
NEG8244	ent-1(10)-Halimene-15,19-dioic acid	11.671	335.223	[M-H2O-H]-	335.222	True	1.56621e+07	2.54184e+08	1.15064e+08	3.00666e+07	2.1668e+08	3.1707e+08	0.613026	0.682687	-0.550703	1.87939e+08	1.45644e+08	8.40879e+07	77.4956	1.28304e+08	1.19811e+08	6.9173e+07	93.3809	0.732276	0.361187	0.361159	0.212521	C20H32O4	Fatty Acyls	RGUIVLSKJWVPDX-UHFFFAOYSA-N	CC(CCC1(C)C(C)CCC2C1=CCCC2(C)C(O)=O)CC(O)=O	---	131752648	HMDB0039441	Lipids and lipid-like molecules	Fatty Acyls	NoSig
NEG5357	Glucose 6-phosphate	6.447	259.022	[M-H]-	259.022	True	9.29699e+06	5.49934e+06	9.3953e+06	8.32204e+06	4.24932e+06	5.31364e+06	0.300617	1.35262	0.435758	5.96167e+06	2.11228e+06	1.21952e+06	35.431	8.06388e+06	2.2215e+06	1.28258e+06	27.5487	0.445278	0.698583	0.698238	0.521986	C6H13O9P	Monosaccharides	NBSCHQHZLSJFNQ-GASJEMHNSA-N	O=P(O)(O)OC[C@H]1OC(O)[C@H](O)[C@@H](O)[C@@H]1O	C00092	---	HMDB0001401	Organic oxygen compounds	Organooxygen compounds	NoSig
POS10967	LPC(P-16:0)	12.994	480.346	[M+H]+	480.345	True	8.19731e+07	7.90002e+07	6.91187e+07	2.94258e+07	2.88178e+07	4.63584e+07	0.00381448	2.19969	1.1373	3.48673e+07	9.95625e+06	5.74824e+06	28.5547	7.66973e+07	6.72947e+06	3.88526e+06	8.77407	0.0143424	1.29802	1.29784	2.41856	C24H50NO6P	1Z-alkenylglycerophosphocholines	HTZINLFNXLXRBC-CQLBIITFSA-N	CCCCCCCCCCCCCC/C=C\OC[C@H](COP(=O)([O-])OCC[N+](C)(C)C)O	---	10917802	HMDB0010407	Lipids and lipid-like molecules	Glycerophospholipids	UP
POS1718	4-Methylphthalic anhydride	10.656	163.039	[M+H]+	163.039	True	2.55926e+08	3.01089e+08	3.025e+08	2.88805e+08	3.03815e+08	2.92753e+08	0.617429	0.970796	-0.0427607	2.95124e+08	7.78103e+06	4.49238e+06	2.63653	2.86505e+08	2.64914e+07	1.52948e+07	9.24639	0.736095	0.357231	0.356849	0.209413	C9H6O3	Phthalic anhydrides	ZOXBWJMCXHTKNU-UHFFFAOYSA-N	CC1=CC2=C(C=C1)C(=O)OC2=O	---	88069	---	Organoheterocyclic compounds	Benzofurans	NoSig
NEG6837	5-Oxooctadecanoic acid	12.645	297.243	[M-H2O-H]-	297.243	True	3.78614e+07	3.59744e+07	4.55682e+07	6.0729e+07	5.37957e+07	5.15441e+07	0.0181671	0.719003	-0.475931	5.53563e+07	4.78716e+06	2.76387e+06	8.64792	3.98013e+07	5.08261e+06	2.93445e+06	12.77	0.0491155	1.21401	1.214	1.74071	C18H34O3	Fatty Acyls	UIROXHXJKJUFSV-UHFFFAOYSA-N	CCCCCCCCCCCCCC(=O)CCCC(O)=O	---	85548	HMDB0034074	Lipids and lipid-like molecules	Fatty Acyls	DOWN
POS5169	Vernolic acid	11.896	297.242	[M+H]+	297.242	True	6.22353e+07	5.94089e+07	6.04369e+07	4.94277e+07	7.52001e+07	5.78517e+07	0.986947	0.997816	-0.00315401	6.08265e+07	1.31412e+07	7.58707e+06	21.6044	6.06937e+07	1.43058e+06	825945	2.35705	0.996634	0.012516	0.0118992	0.00570614	C18H32O3	Long-chain fatty acids	CCPPLLJZDQAOHD-FLIBITNWSA-N	CCCCCC1C(O1)C/C=C\CCCCCCCC(=O)O	C08368	5356421	HMDB0004702	Lipids and lipid-like molecules	Fatty Acyls	NoSig
POS4806	Tris(chloroethyl) phosphate	10.616	284.961	[M+H]+	284.961	True	1.15956e+07	1.46368e+07	1.80481e+07	1.36651e+07	1.4053e+07	1.48158e+07	0.773889	1.04106	0.0580598	1.4178e+07	585458	338014	4.12935	1.47602e+07	3.228e+06	1.86368e+06	21.8696	0.861287	0.207702	0.207717	0.111321	C6H12Cl3O4P	Alkyl phosphates	HQUQLFOMPYWACS-UHFFFAOYSA-N	ClCCOP(=O)(OCCCl)OCCCl	C14445	8295	HMDB0259276	Organic acids and derivatives	Organic phosphoric acids and derivatives	NoSig
NEG2346	N-Caproylglycine	8.737	172.097	[M-H]-	172.098	True	4.89739e+07	4.41882e+07	4.26872e+07	3.78664e+07	4.04402e+07	4.31587e+07	0.12027	1.11842	0.161462	4.04884e+07	2.64652e+06	1.52797e+06	6.53647	4.52831e+07	3.28325e+06	1.89559e+06	7.2505	0.219686	0.959617	0.959371	0.919843	C8H15NO3	Amino acids and derivatives	UPCKIPHSXMXJOX-UHFFFAOYSA-N	O=C(O)CN=C(O)CCCCC	---	99463	HMDB0000701	Organic acids and derivatives	Carboxylic acids and derivatives	NoSig
POS2096	Methyl L-Phenylalaninate	7.336	180.102	[M+H]+	180.102	True	3.678e+07	3.99291e+07	4.26989e+07	1.28499e+07	1.45304e+07	1.44113e+07	0.00013422	2.85722	1.51461	1.39306e+07	937742	541405	6.73154	3.98026e+07	2.96146e+06	1.7098e+06	7.44037	0.00155381	1.3544	1.35443	3.87218	C10H13NO2	Amino acids and derivatives	VSDUZFOSJDMAFZ-VIFPVBQESA-N	COC(=O)C(N)Cc1ccccc1	---	736234	HMDB0245704	Organic acids and derivatives	Carboxylic acids and derivatives	UP
NEG7956	Docosahexaenoicacid(DHA)	13.392	327.233	[M-H]-	327.233	True	1.24524e+08	1.25555e+08	1.08905e+08	1.03678e+08	9.64396e+07	1.36859e+08	0.617238	1.0653	0.0912656	1.12326e+08	2.15527e+07	1.24435e+07	19.1877	1.19661e+08	9.32957e+06	5.38643e+06	7.79667	0.736095	0.357687	0.357035	0.209547	C22H32O2	Fatty Acyls	DVSZKTAMJJTWFG-UHFFFAOYSA-N	CCCCCCCCCC=CC=CC=CC=CC=CC=CC(O)=O	---	175542	HMDB0244316	Lipids and lipid-like molecules	Fatty Acyls	NoSig
POS4726	1-Methyladenosine	4.809	282.119	[M+H]+	282.12	True	8.1529e+07	6.14745e+07	8.53624e+07	6.04149e+07	4.33691e+07	2.92691e+07	0.0527181	1.71635	0.779345	4.4351e+07	1.55961e+07	9.00441e+06	35.1651	7.6122e+07	1.28291e+07	7.40687e+06	16.8533	0.113219	1.10229	1.10233	1.27804	C11H15N5O4	Purine nucleosides	GFYLSDSUCHVORB-IOSLPCCCSA-N	N=C1C=2N=CN(C2N=CN1C)C3OC(CO)C(O)C3O	C02494	27476	HMDB0003331	Nucleosides, nucleotides, and analogues	Purine nucleosides	NoSig
NEG3992	Phenylalanylglycine	6.89	221.093	[M-H]-	221.093	True	4.3353e+07	3.87298e+07	4.04657e+07	1.33502e+07	1.47794e+07	1.44638e+07	4.69627e-05	2.87717	1.52465	1.41978e+07	750789	433468	5.28807	4.08495e+07	2.33541e+06	1.34835e+06	5.7171	0.000808288	1.35974	1.35972	4.32825	C11H14N2O3	Carboxylic acids and derivatives	GLUBLISJVJFHQS-VIFPVBQESA-N	N[C@@H](CC1=CC=CC=C1)C(=O)NCC(O)=O	---	6992303;6992304	HMDB0028995	Organic acids and derivatives	Carboxylic acids and derivatives	UP
POS11040	LPE(18:0)	11.157	482.323	[M+H]+	482.325	True	2.80917e+06	9.27e+08	7.3987e+08	2.06927e+06	3.0475e+08	2.70263e+08	0.288572	2.89331	1.53272	1.92361e+08	1.65697e+08	9.56652e+07	86.1386	5.5656e+08	4.88604e+08	2.82096e+08	87.7901	0.430568	0.712953	0.713205	0.539746	C23H48NO7P	Glycerophospholipids	KIHAGWUUUHJRMS-JOCHJYFZSA-N	[H][C@@](CO)(COP(O)(=O)OCCN)OC(=O)CCCCCCCCCCCCCCCCC	---	53480667;90658453	HMDB0011129	Lipids and lipid-like molecules	Glycerophospholipids	NoSig
POS7158	GMP	6.369	364.065	[M+H]+	364.065	True	1.38287e+08	3.6364e+08	2.98217e+08	1.53901e+08	3.10274e+08	3.47231e+08	0.968517	0.986121	-0.0201633	2.70469e+08	1.02628e+08	5.92522e+07	37.9444	2.66715e+08	1.15932e+08	6.69334e+07	43.4667	0.988752	0.0288676	0.0287038	0.0138928	C10H14N5O8P	Purine nucleotide sugars	RQFCJASXJCIDSX-UHFFFAOYSA-N	NC1=NC2=C(N=CN2[C@@H]2O[C@H](COP(O)(O)=O)[C@@H](O)[C@H]2O)C(=O)N1	C00144	---	HMDB0001397	Nucleosides, nucleotides, and analogues	Purine nucleotides	NoSig
POS750	3-Methylbenzaldehyde	4.186	121.065	[M+H]+	121.065	True	5.72637e+07	4.54722e+07	3.12303e+07	9.27361e+07	9.94888e+07	4.44391e+07	0.144302	0.566061	-0.820971	7.8888e+07	3.0024e+07	1.73344e+07	38.0591	4.46554e+07	1.30359e+07	7.52628e+06	29.1922	0.256303	0.918404	0.917935	0.840728	C8H8O	Benzene and substituted derivatives	OVWYEQOVUDKZNU-UHFFFAOYSA-N	CC1=CC(C=O)=CC=C1	C07209	12105	HMDB0029637	Benzenoids	Benzene and substituted derivatives	NoSig
POS889	1-Piperideine-2-carboxylic acid	6.981	128.071	[M+CH3OH+H]+	128.071	True	4.77428e+07	3.81914e+07	4.1311e+07	3.20516e+07	4.22862e+07	3.51203e+07	0.224957	1.1625	0.217233	3.6486e+07	5.2522e+06	3.03236e+06	14.3951	4.24151e+07	4.87044e+06	2.81195e+06	11.4828	0.355501	0.796405	0.79666	0.647901	C6H9NO2	Pyridines and derivatives	GEJXSVNGWOSZPC-UHFFFAOYSA-N	OC(=O)C1=NCCCC1	C04092	1194	HMDB0001084	Organoheterocyclic compounds	Pyridines and derivatives	NoSig
NEG5589	Dodecyl sulfate	10.897	265.147	[M-H]-	265.148	True	3.88502e+09	4.10776e+09	1.4378e+08	2.38608e+10	9.52486e+09	3.36069e+08	0.287941	0.241286	-2.05119	1.12406e+10	1.18558e+10	6.84496e+09	105.474	2.71219e+09	2.22709e+09	1.28581e+09	82.1142	0.430151	0.714187	0.713996	0.540697	C12H26O4S	Sulfuric acid monoesters	MOTZDAYCYVMXPC-UHFFFAOYSA-N	CCCCCCCCCCCCOS(O)(=O)=O	---	8778	---	Organic acids and derivatives	Organic sulfuric acids and derivatives	NoSig
NEG6684	1-Tetradecanol hydrogen sulfate	13.396	293.179	[M-H]-	293.179	True	485606	8.3677e+08	5.75188e+08	7.18106e+08	7.23404e+08	4.48225e+08	0.578102	0.74743	-0.41999	6.29912e+08	1.57368e+08	9.08562e+07	24.9825	4.70815e+08	4.27801e+08	2.46991e+08	90.8639	0.712138	0.396092	0.395637	0.237995	C14H30O4S	Sulfuric acid monoesters	URLJMZWTXZTZRR-UHFFFAOYSA-N	CCCCCCCCCCCCCCOS(O)(=O)=O	---	5248;88769738	HMDB0014607	Organic acids and derivatives	Organic sulfuric acids and derivatives	NoSig
POS7448	Cholic acid	10.333	373.273	[M+H-2H2O]+	373.274	True	1.41695e+07	1.85736e+07	1.49701e+07	1.01593e+07	1.23718e+07	1.08241e+07	0.0335135	1.43046	0.516478	1.11184e+07	1.13525e+06	655435	10.2105	1.59044e+07	2.346e+06	1.35447e+06	14.7506	0.0787566	1.15728	1.15756	1.47478	C24H40O5	Hydroxy bile acids, alcohols and derivatives	BHQCQFFYRZLCQQ-OELDTZBJSA-N	C[C@H](CCC(=O)O)[C@H]1CC[C@@H]2[C@@]1([C@H](C[C@H]3[C@H]2[C@@H](C[C@H]4[C@@]3(CC[C@H](C4)O)C)O)O)C	C00695	221493	HMDB0000619	Lipids and lipid-like molecules	Steroids and steroid derivatives	UP
NEG7294	Lauryl Ether Sulphate	11.965	309.174	[M-H]-	309.174	True	7.60324e+07	5.56236e+07	77783628	8.40168e+07	1.66201e+08	8.58087e+07	0.206537	0.623283	-0.68204	1.12009e+08	4.69402e+07	2.71009e+07	41.9076	6.98132e+07	1.23197e+07	7.11278e+06	17.6467	0.334289	0.823076	0.822516	0.685002	C14H30O5S	Sulfuric acid monoesters	QTDIEDOANJISNP-UHFFFAOYSA-N	O=S(O)(=O)OCCOCCCCCCCCCCCC	---	24761	---	Organic acids and derivatives	Organic sulfuric acids and derivatives	NoSig
POS5346	20-Hydroxy-5,8,11,14-eicosatetraenoic acid	13.188	303.232	[M+H-H2O]+	303.231	True	3.57097e+07	3.53674e+07	2.84784e+07	2.60943e+07	2.73934e+07	2.61726e+07	0.0502466	1.24975	0.321641	2.65534e+07	728490	420594	2.74349	3.31852e+07	4.07978e+06	2.35546e+06	12.294	0.109061	1.10875	1.10884	1.29889	C20H32O3	Long-chain fatty acids	NNDIXBJHNLFJJP-DTLRTWKJSA-N	C(CC/C=C\C/C=C\C/C=C\C/C=C\CCCC(=O)O)CCO	C14748	5283157	HMDB0005998	Lipids and lipid-like molecules	Fatty Acyls	NoSig
NEG9695	Maltose	1.001	377.085	[M+Cl]-	377.086	True	8.14474e+08	8.05657e+08	8.20229e+08	9.21101e+08	8.72042e+08	9.50599e+08	0.0122492	0.889428	-0.169051	9.14581e+08	3.96822e+07	2.29105e+07	4.33884	8.13453e+08	7.33976e+06	4.23761e+06	0.902296	0.0358098	1.24151	1.24188	1.91189	C12H22O11	Glycosyl compounds	GUBGYTABKSRVRQ-DKBJLJRDSA-N	OC[C@H]1O[C@H](O[C@@H]2[C@@H](CO)O[C@@H](O)[C@H](O)[C@H]2O)[C@H](O)[C@@H](O)[C@@H]1O	C00208	439186	HMDB0000163	Organic oxygen compounds	Organooxygen compounds	DOWN
NEG1153	D-Leucine	4.435	130.086	[M-H]-	130.087	True	1.82196e+07	1.93597e+07	5.09759e+07	1.85536e+07	2.18457e+07	1.44899e+07	0.363077	1.61334	0.690055	1.82964e+07	3.68465e+06	2.12733e+06	20.1387	2.95184e+07	1.85915e+07	1.07338e+07	62.9827	0.515908	0.623781	0.623908	0.440001	C6H13NO2	Carboxylic acids and derivatives	ROHFNLRQFUQHCH-RXMQYKEDSA-N	CC(C)C[C@@H](N)C(O)=O	C01570	439524;6950207	HMDB0013773	Organic acids and derivatives	Carboxylic acids and derivatives	NoSig
POS6030	11-Hdohe	12.528	327.231	[M+H-H2O]+	327.231	True	2.68743e+07	4.00772e+07	2.60137e+07	4.51303e+07	5.03628e+07	6.67089e+07	0.0437264	0.573144	-0.803031	5.40673e+07	1.12562e+07	6.49875e+06	20.8188	3.09884e+07	7.8829e+06	4.5512e+06	25.4383	0.0966251	1.12658	1.12676	1.35926	C22H32O3	Very long-chain fatty acids	LTERDCBCHFKFRI-BGKMTWLOSA-N	CC/C=C\C/C=C\C/C=C\CC(/C=C/C=C\C/C=C\CCC(=O)O)O	---	11631564	HMDB0060040	Lipids and lipid-like molecules	Fatty Acyls	DOWN
POS4359	Inosine	6.741	269.088	[M+H]+	269.088	True	8.00452e+09	9.23886e+09	8.34445e+09	4.65694e+09	4.75561e+09	4.65942e+09	0.000485007	1.81835	0.862633	4690657985	5.6265e+07	3.24846e+07	1.19951	8.52928e+09	6.37591e+08	3.68114e+08	7.47533	0.00325648	1.34266	1.34272	3.31425	C10H12N4O5	Purine nucleosides	UGQMRVRMYYASKQ-KQYNXXCUSA-N	OC[C@H]1O[C@H]([C@H](O)[C@@H]1O)N1C=NC2=C1N=CN=C2O	C00294	135398641	HMDB0000195	Nucleosides, nucleotides, and analogues	Purine nucleosides	UP
NEG4710	Thymidine	6.796	241.082	[M-H]-	241.083	True	1.1091e+08	1.04392e+08	9.89544e+07	8.73048e+07	9.89409e+07	9.68331e+07	0.104982	1.11014	0.150739	9.43596e+07	6.19989e+06	3.57951e+06	6.57049	1.04752e+08	5.98584e+06	3.45593e+06	5.71429	0.197975	0.987562	0.987634	0.978885	C10H14N2O5	Pyrimidine 2'-deoxyribonucleosides	IQFYYKKMVGJFEH-UHFFFAOYSA-N	Cc1cn(C2CC(O)C(CO)O2)c(=O)nc1O	C00214	5789	HMDB0000273	Nucleosides, nucleotides, and analogues	Pyrimidine nucleosides	NoSig
NEG3424	Cinnamoylglycine	9.106	204.066	[M-H]-	204.067	True	7.01635e+07	6.85429e+07	6.95824e+07	5.94027e+07	5.70529e+07	5.54291e+07	0.000624606	1.21179	0.277145	5.72949e+07	1.99784e+06	1.15345e+06	3.48694	6.94296e+07	821050	474034	1.18256	0.00383552	1.33936	1.33938	3.20439	C11H11NO3	Amino acids and derivatives	YAADMLWHGMUGQL-UHFFFAOYSA-N	O=C(O)CN=C(O)C=CC=1C=CC=CC1	---	709625	HMDB0011621	Organic acids and derivatives	Carboxylic acids and derivatives	UP
NEG6347	12-hydroxyheptadecanoic acid	12.428	285.244	[M-H2O-H]-	285.243	True	3.35093e+06	3.80234e+08	4.94541e+08	7.05143e+06	2.50974e+08	3.00318e+08	0.573028	1.57274	0.653276	1.86114e+08	1.57024e+08	9.06576e+07	84.3693	2.92709e+08	2.57026e+08	1.48394e+08	87.8096	0.708746	0.400557	0.400691	0.241824	C17H34O3	Fatty Acyls	UGNYDWLENCPIBP-UHFFFAOYSA-N	CCCCCC(O)CCCCCCCCCCC(O)=O	---	15110021	HMDB0061663	Lipids and lipid-like molecules	Fatty Acyls	NoSig
POS4780	Guanosine	6.729	284.099	[M+H]+	284.099	True	1.14711e+09	1.36365e+09	1.23856e+09	2.97389e+08	2.97866e+08	2.94763e+08	0.000109674	4.21265	2.07473	2.96673e+08	1.67111e+06	964814	0.563283	1.24978e+09	1.08705e+08	6.27611e+07	8.69798	0.00139605	1.35564	1.35567	3.9599	C10H13N5O5	Purine nucleosides	NYHBQMYGNKIUIF-BUDDTFTENA-N	NC1=NC2=C(N=CN2[C@@H]2O[C@H](CO)[C@@H](O)[C@H]2O)C(=O)N1	C00387	135398635	HMDB0000133	Nucleosides, nucleotides, and analogues	Purine nucleosides	UP
NEG2151	Phthalic acid	7.896	165.018	[M-H]-	165.019	True	3.88619e+08	4.54005e+08	4.35244e+08	4.35605e+08	4.54323e+08	5.23614e+08	0.243387	0.904018	-0.145576	4.71181e+08	4.63632e+07	2.67678e+07	9.83979	4.25956e+08	3.36678e+07	1.94381e+07	7.90404	0.374573	0.771377	0.771627	0.613703	C8H6O4	Benzoic acids	XNGIFLGASWRNHJ-UHFFFAOYSA-N	O=C(O)C=1C=CC=CC1C(=O)O	C01606	---	HMDB0002107	Benzenoids	Benzene and substituted derivatives	NoSig
POS1778	2-Pyrazinoylguanidine	3.86	166.072	[M+Na]+	166.072	True	5.07256e+07	5.4862e+07	6.10938e+07	1.61778e+07	2.22877e+07	1.72201e+07	0.000481637	2.99326	1.58172	1.85619e+07	3.2685e+06	1.88707e+06	17.6087	5.55605e+07	5.21928e+06	3.01336e+06	9.39388	0.00325648	1.34272	1.34281	3.31728	C6H7N5O	Diazines	WNBSDCKJFDZMHT-UHFFFAOYSA-N	NC(N)=NC(=O)C1=NC=CN=C1	---	124704	HMDB0247125	Organoheterocyclic compounds	Diazines	UP
POS2121	12-Hydroxydodecanoic acid	9.869	181.159	[M-2H2O+H]+	181.159	True	1.02466e+07	8.54099e+06	1.04849e+07	8.63202e+06	7.87203e+06	8.68228e+06	0.110256	1.16224	0.216908	8.39544e+06	453983	262107	5.40749	9.75752e+06	1.06026e+06	612144	10.8661	0.205073	0.978062	0.977691	0.957598	C12H24O3	Medium-chain hydroxy acids and derivatives	ZDHCZVWCTKTBRY-UHFFFAOYSA-N	OCCCCCCCCCCCC(O)=O	C08317	79034	HMDB0002059	Organic acids and derivatives	Hydroxy acids and derivatives	NoSig
NEG11999	Cholesteryl sulfate	13.466	465.304	[M-H]-	465.304	True	1.31729e+08	9.48047e+07	5.95022e+07	1.4875e+08	1.11222e+08	1.25211e+08	0.233206	0.742597	-0.429349	1.28394e+08	1.89658e+07	1.09499e+07	14.7715	9.53453e+07	3.61164e+07	2.08518e+07	37.8796	0.363956	0.785117	0.785358	0.63226	C27H45O4S-	Cholesterols and derivatives	BHYOQNUELFTYRT-DPAQBDIFSA-M	C[C@H](CCCC(C)C)[C@H]1CC[C@@H]2[C@@]1(CC[C@H]3[C@H]2CC=C4[C@@]3(CC[C@@H](C4)OS(=O)(=O)[O-])C)C	C18043	5200198	HMDB0000653	Lipids and lipid-like molecules	Steroids and steroid derivatives	NoSig
POS4753	Glucose 6-phosphate	1.64	283.019	[M+Na]+	283.019	True	1.47761e+08	3.67805e+08	1.24179e+08	3.06434e+08	1.80593e+08	1.6849e+08	0.955849	0.975941	-0.0351342	2.18506e+08	7.63884e+07	4.41029e+07	34.9595	2.13249e+08	1.34368e+08	7.75775e+07	63.0101	0.982378	0.0404381	0.0402592	0.0196107	C6H13O9P	Monosaccharides	NBSCHQHZLSJFNQ-GASJEMHNSA-N	O=P(O)(O)OC[C@H]1OC(O)[C@H](O)[C@@H](O)[C@@H]1O	C00092	---	HMDB0001401	Organic oxygen compounds	Organooxygen compounds	NoSig
POS1411	Phthalic anhydride	7.958	149.023	[M+H]+	149.023	True	2.52466e+08	2.61118e+08	2.48913e+08	2.35167e+08	2.5354e+08	2.44549e+08	0.203808	1.03988	0.0564148	2.44419e+08	9.18698e+06	5.30411e+06	3.75871	2.54166e+08	6.27779e+06	3.62448e+06	2.46996	0.331629	0.825992	0.826425	0.690779	C8H4O3	Phthalic anhydrides	LGRFSURHDFAFJT-UHFFFAOYSA-N	C1=CC=C2C(=C1)C(=O)OC2=O	---	6811	HMDB0256501	Organoheterocyclic compounds	Benzofurans	NoSig
NEG3502	2-Naphthalenesulfonic acid	8.708	207.011	[M-H]-	207.012	True	3.92593e+07	3.51454e+07	3.27937e+07	5.09142e+07	5.69221e+07	5.79304e+07	0.0025122	0.646682	-0.628871	5.52556e+07	3.7934e+06	2.19012e+06	6.8652	3.57328e+07	3.27258e+06	1.88942e+06	9.15848	0.0104418	1.31101	1.31103	2.59995	C10H8O3S	Naphthalene sulfonates	KVBGVZZKJNLNJU-UHFFFAOYSA-N	OS(=O)(=O)C1=CC=C2C=CC=CC2=C1	C16202	8420	HMDB0255446	Benzenoids	Naphthalenes	DOWN
NEG2471	N-Formylmethionine	7.258	176.037	[M-H]-	176.039	True	1.22007e+07	1.12295e+07	1.11189e+07	6.67584e+06	6.50356e+06	7.10504e+06	0.000253059	1.70323	0.768276	6.76148e+06	309750	178834	4.58109	1.15164e+07	595213	343647	5.1684	0.0021874	1.34967	1.34958	3.59678	C6H11NO3S	Amino acids and derivatives	PYUSHNKNPOHWEZ-YFKPBYRVSA-N	CSCCC(N=CO)C(=O)O	C03145	6995182	HMDB0001015	Organic acids and derivatives	Carboxylic acids and derivatives	UP
POS4531	Ensulizole	7.296	275.048	[M+H]+	275.048	True	1.55627e+07	1.51205e+07	1.56472e+07	1.20546e+07	1.34022e+07	1.44513e+07	0.0397853	1.16093	0.215277	1.33027e+07	1.20148e+06	693672	9.03183	1.54434e+07	282887	163325	1.83176	0.0900327	1.13837	1.1382	1.40028	C13H10N2O3S	Phenylbenzimidazoles	UVCJGUGAGLDPAA-UHFFFAOYSA-N	OS(=O)(=O)C1=CC=C2NC(=NC2=C1)C1=CC=CC=C1	---	33919	---	Organoheterocyclic compounds	Benzimidazoles	UP
POS4268	Cytidine	1.469	266.074	[M+Na]+	266.075	True	1.73947e+08	1.87637e+08	1.99005e+08	1.40645e+08	1.55882e+08	1.54634e+08	0.0139753	1.24255	0.313299	1.50387e+08	8.4599e+06	4.88432e+06	5.62541	1.86863e+08	1.2547e+07	7.24402e+06	6.71456	0.0398773	1.2331	1.23318	1.85464	C9H13N3O5	Pyrimidine nucleosides	UHDGCWIWMRVCDJ-XVFCMESISA-N	NC1=NC(=O)N(C=C1)[C@@H]1O[C@H](CO)[C@@H](O)[C@H]1O	C00475	6175	HMDB0000089	Nucleosides, nucleotides, and analogues	Pyrimidine nucleosides	UP
POS2905	Prolylvaline	6.821	215.139	[M+H]+	215.139	True	6.84125e+07	9.88034e+07	1.15126e+08	1.15786e+07	1.56004e+07	1.0579e+07	0.0040798	7.47767	2.90259	1.2586e+07	2.65797e+06	1.53458e+06	21.1184	9.41141e+07	2.37073e+07	1.36874e+07	25.19	0.0151034	1.29536	1.29544	2.38936	C10H18N2O3	Peptides	GIAZPLMMQOERPN-YUMQZZPRSA-N	CC(C)[C@@H](C(=O)N1CCC[C@H]1C(=O)O)N	---	9837272	HMDB0029135	Organic acids and derivatives	Carboxylic acids and derivatives	UP
NEG1930	N-Acetylvaline	7.372	158.081	[M-H]-	158.082	True	2.82396e+07	2.66892e+07	2.69801e+07	2.83035e+07	2.9059e+07	3.79413e+07	0.226968	0.85945	-0.218514	3.1768e+07	5.35963e+06	3.09438e+06	16.8712	2.7303e+07	824065	475774	3.01822	0.357303	0.793348	0.793891	0.644036	C7H13NO3	Carboxylic acids and derivatives	IHYJTAOFMMMOPX-LURJTMIESA-N	CC(C)[C@H](NC(C)=O)C(O)=O	---	66789	HMDB0011757	Organic acids and derivatives	Carboxylic acids and derivatives	NoSig
NEG7589	Atractyligenin	11.719	317.211	[M-H2O-H]-	317.212	True	3309.03	4.06506e+07	1.4832e+07	3309.03	2.36503e+07	4.15834e+07	0.856955	0.850528	-0.233569	2.17457e+07	2.08554e+07	1.20409e+07	95.9059	1.84953e+07	2.05698e+07	1.1876e+07	111.216	0.918596	0.1308	0.130797	0.0670418	C20H30O3	Prenol lipids	DKWHHGKUVUGDBR-LREIXEELSA-N	C[C@H]1C(=C)C2CC11CCC3[C@@H](C[C@@H](O)C[C@@]3(C)C1CC2)C(O)=O	---	131770032	HMDB0061114	Lipids and lipid-like molecules	Prenol lipids	NoSig
POS1371	Glutamine	1.307	147.076	[M+H]+	147.076	True	2.61815e+09	2.87427e+09	2.83618e+09	1.6284e+09	1.70557e+09	1.84775e+09	0.000512591	1.60731	0.684646	1.72724e+09	1.11269e+08	6.42409e+07	6.442	2.7762e+09	1.38194e+08	7.97863e+07	4.97781	0.00336767	1.34205	1.34203	3.29023	C5H10N2O3	Amino acids and derivatives	ZDXPYRJPNDTMRX-VKHMYHEASA-N	O=C(O)C(N)CCC(=N)O	C00064	5961;6992086	HMDB0000641	Organic acids and derivatives	Carboxylic acids and derivatives	UP
POS11186	beta-D-Glucopyranoside, (1R,2S,4R,5R)-5-hydroxy-1,7,7-trimethylbicyclo[2.2.1]hept-2-yl 6-O-[(2R,3R,4R)-tetrahydro-3,4-dihydroxy-4-(hydroxymethyl)-2-furanyl]-	10.192	487.215	[M+Na]+	487.215	True	8.51834e+07	8.19609e+07	9.31321e+07	8.13354e+07	6.84243e+07	8.21746e+07	0.16404	1.1222	0.166328	7.73114e+07	7.70791e+06	4.45016e+06	9.96994	8.67588e+07	5.74979e+06	3.31964e+06	6.62732	0.283532	0.886619	0.886078	0.78505	C21H36O11	Terpene glycosides	BVEVSYQMQABMQM-UHFFFAOYSA-N	OCC1(O)COC(OCC2OC(OC3CC4C(O)CC3(C)C4(C)C)C(O)C(O)C2O)C1O	---	51136374	---	Lipids and lipid-like molecules	Prenol lipids	NoSig
POS304	Phosphoric acid	1.762	98.9848	[M+H]+	98.9842	True	1.72234e+09	2.23969e+09	1.94296e+09	1.60732e+09	2.58243e+09	3.70829e+09	0.347883	0.747652	-0.419562	2.63268e+09	1.05139e+09	6.07018e+08	39.9359	1.96833e+09	2.59607e+08	1.49884e+08	13.1892	0.498959	0.641286	0.641534	0.458567	H3O4P	Non-metal phosphates	NBIIXXVUZAFLBC-UHFFFAOYSA-N	OP(=O)(O)O	C00009	1004;22486802	HMDB0001429	Homogeneous non-metal compounds	Non-metal oxoanionic compounds	NoSig
NEG6635	N-Fructosyl isoleucine	5.902	292.14	[M-H]-	292.14	True	2.80811e+07	34166818	1.86653e+07	3.06051e+07	4.39286e+07	3.75087e+07	0.154903	0.722166	-0.469597	3.73475e+07	6.66319e+06	3.847e+06	17.8411	2.69711e+07	7.81016e+06	4.5092e+06	28.9575	0.272479	0.900934	0.90061	0.80994	C12H23NO7	N-Fructosyl amino acids	VYGRYVGDPYFVCA-UHFFFAOYSA-N	O=C(O)C(NCC1(O)(OC(CO)C(O)C1(O)))C(C)CC	---	139292115	---	Organic acids and derivatives	Carboxylic acids and derivatives	NoSig
POS888	1-Piperideine-2-carboxylic acid	2.74	128.071	[M+H]+	128.071	True	4.26148e+07	8.04278e+07	9.78282e+07	8.85033e+07	6.59052e+07	9.58446e+07	0.626741	0.88259	-0.180185	8.34177e+07	1.56042e+07	9.00907e+06	18.7061	7.36236e+07	2.82286e+07	1.62978e+07	38.3417	0.745017	0.347492	0.347756	0.202912	C6H9NO2	Pyridines and derivatives	GEJXSVNGWOSZPC-UHFFFAOYSA-N	OC(=O)C1=NCCCC1	C04092	1194	HMDB0001084	Organoheterocyclic compounds	Pyridines and derivatives	NoSig
NEG7516	9,10-Dihydroxystearic acid	12.293	315.254	[M-H]-	315.254	True	3.30778e+07	2.92928e+07	3.40525e+07	1.55175e+08	1.95616e+08	1.0642e+09	0.212381	0.0681438	-3.87527	4.71665e+08	5.13551e+08	2.96499e+08	108.881	3.2141e+07	2.51432e+06	1.45164e+06	7.82277	0.341937	0.813688	0.814215	0.672883	C18H36O4	Fatty Acyls	VACHUYIREGFMSP-UHFFFAOYSA-N	CCCCCCCCC(O)C(O)CCCCCCCC(O)=O	C08314	89377	HMDB0302281	Lipids and lipid-like molecules	Fatty Acyls	NoSig
NEG3446	2-Methylcitric acid	6.705	205.035	[M-H]-	205.035	True	8.26958e+07	8.64316e+07	7.01933e+07	3.85615e+07	5.40318e+07	6.07346e+07	0.0249796	1.56084	0.642325	5.11093e+07	1.13718e+07	6.56551e+06	22.25	7.97735e+07	8.50443e+06	4.91004e+06	10.6607	0.0631989	1.18694	1.18691	1.60241	C7H10O7	Tricarboxylic acids and derivatives	YNOXCRMFGMSKIJ-UHFFFAOYSA-N	CC(C(=O)O)C(CC(=O)O)(C(=O)O)O	C02225	515	HMDB0000379	Organic acids and derivatives	Carboxylic acids and derivatives	UP
POS1656	N-Hydroxy-1-aminonaphthalene	6.811	160.076	[M+H-H2O]+	160.076	True	3.2014e+07	3.15805e+07	3.28513e+07	8.88044e+06	8.98013e+06	7.37121e+06	3.16141e-06	3.82239	1.93448	8.41059e+06	901511	520487	10.7188	3.21486e+07	646018	372979	2.00947	0.000214624	1.36537	1.3654	5.50012	C10H9NO	Naphthalenes	CWFINLADSFPMHF-UHFFFAOYSA-N	ONC1=CC=CC2=CC=CC=C12	C14789	11828	HMDB0062503	Benzenoids	Naphthalenes	UP
POS3719	Aspartylleucine	7.015	247.128	[M+H]+	247.129	True	2.5423e+08	2.81397e+08	2.64219e+08	8.96529e+07	1.07934e+08	1.00807e+08	6.2616e-05	2.68051	1.42251	9.94644e+07	9.21411e+06	5.31977e+06	9.26372	2.66615e+08	1.37411e+07	7.93345e+06	5.15392	0.000968566	1.35848	1.35854	4.20331	C10H18N2O5	Peptides	ZVDPYSVOZFINEE-UHFFFAOYSA-N	CC(C)C[C@@H](C(=O)O)NC(=O)[C@H](CC(=O)O)N	---	6992367	HMDB0028757	Organic acids and derivatives	Carboxylic acids and derivatives	UP
NEG7658	19-Hydroxyeicosatetraenoic acid	11.674	319.228	[M-H]-	319.228	True	3309.03	2.03676e+08	8.39368e+07	3309.03	9.96752e+07	2.26843e+08	0.890373	0.880849	-0.183034	1.08841e+08	1.13697e+08	6.56431e+07	104.462	9.5872e+07	1.0236e+08	5.90973e+07	106.767	0.941208	0.100013	0.100113	0.050428	C20H32O3	Fatty Acyls	TYOOWNNSOCLYEI-UHFFFAOYSA-N	CC(O)CCCCCCCCCC=CC=CC=CC=CC(O)=O	---	54340460	HMDB0244833	Lipids and lipid-like molecules	Fatty Acyls	NoSig
POS22640	PC(18:3/18:3)	12.443	778.537	[M+H]+	778.538	True	2.17024e+06	5.54391e+06	9.86659e+06	4.46288e+06	6.2055e+06	1.34318e+07	0.572023	0.729487	-0.455046	8.03338e+06	4.75564e+06	2.74567e+06	59.1985	5.86025e+06	3.85792e+06	2.22737e+06	65.832	0.708219	0.401327	0.401694	0.242587	C44H76NO8P	Phosphatidylcholines	XXKFQTJOJZELMD-JICBSJGISA-N	CC/C=C\C/C=C\C/C=C\CCCCCCCC(=O)OC[C@H](COP(=O)([O-])OCC[N+](C)(C)C)OC(=O)CCCCCCC/C=C\C/C=C\C/C=C\CC	---	24778990	HMDB0008206	Lipids and lipid-like molecules	Glycerophospholipids	NoSig
NEG2387	Arginine	0.853	173.104	[M-H]-	173.104	True	1.37074e+08	1.22475e+08	1.36537e+08	1.61609e+08	1.63132e+08	1.72442e+08	0.00452546	0.79666	-0.327964	1.65728e+08	5.86417e+06	3.38568e+06	3.53844	1.32029e+08	8.27834e+06	4.7795e+06	6.27011	0.016313	1.29139	1.29157	2.34434	C6H14N4O2	Amino acids and derivatives	ODKSFYDXXFIFQN-UHFFFAOYSA-N	N[C@@H](CCCNC(N)=N)C(O)=O	C00062	6322;28782	HMDB0000517	Organic acids and derivatives	Carboxylic acids and derivatives	DOWN
NEG2364	Phenylsulfate	7.645	172.99	[M-H]-	172.991	True	1.92609e+08	1.9649e+08	2.02796e+08	1.67905e+08	1.64675e+08	1.72727e+08	0.00157958	1.17136	0.228181	1.68436e+08	4.05227e+06	2.33958e+06	2.40583	1.97298e+08	5.1417e+06	2.96856e+06	2.60605	0.00742402	1.32288	1.32277	2.80146	C6H6O4S	Phenylsulfates	CTYRPMDGLDAWRQ-UHFFFAOYSA-N	O=S(=O)(O)OC=1C=CC=CC1	C00850	74426	HMDB0060015	Organic acids and derivatives	Organic sulfuric acids and derivatives	UP
POS2627	Dinotefuran	7.388	203.114	[M+H]+	203.114	True	248805	120607	166397	347407	600263	222079	0.146185	0.458055	-1.12641	389917	192642	111222	49.406	178603	64964.6	37507.3	36.3737	0.259272	0.915359	0.914818	0.835097	C7H14N4O3	Nitroguanidines	YKBZOVFACRVRJN-UHFFFAOYSA-N	[O-][N+](=O)NC(=N/C)\NCC1CCOC1	C18509	197701;86287520;135418283;135779803	HMDB0244741	Organic nitrogen compounds	Organonitrogen compounds	NoSig
POS4999	Etiocholanolone	12.056	291.231	[M+H]+	291.232	True	474195	795487	748775	4.26324e+06	4.08827e+06	2.15798e+06	0.0142519	0.192061	-2.38037	3.50316e+06	1.16824e+06	674486	33.3483	672819	173592	100223	25.8006	0.0405019	1.23213	1.23184	1.84613	C19H30O2	Androgens and derivatives	QGXBDMJGAMFCBF-BNSUEQOYSA-N	C[C@]12CC[C@H](C[C@H]1CC[C@@H]3[C@@H]2CC[C@]4([C@H]3CCC4=O)C)O	C04373	5880	HMDB0000490	Lipids and lipid-like molecules	Steroids and steroid derivatives	DOWN
NEG8104	Floionolic acid	11.209	331.249	[M-H]-	331.248	True	3.82281e+06	3.77847e+06	4.88971e+06	3.67941e+07	3.89958e+07	3.63591e+07	3.12267e-06	0.111378	-3.16646	3.7383e+07	1.41358e+06	816133	3.78135	4.16366e+06	629165	363249	15.1109	0.000214624	1.36545	1.36541	5.50547	C18H36O5	Fatty Acyls	OISFHODBOQNZAG-UHFFFAOYSA-N	OCCCCCCCCC(O)C(O)CCCCCCCC(O)=O	C19621	5282938	HMDB0034295	Lipids and lipid-like molecules	Fatty Acyls	DOWN
POS4039	Myristamine Oxide	10.895	258.279	[M+H]+	258.279	True	3.88908e+08	4.21497e+08	4.68787e+08	2.38208e+08	2.45228e+08	2.78973e+08	0.00284206	1.67783	0.746595	2.54136e+08	2.17932e+07	1.25823e+07	8.57539	4.26397e+08	4.01642e+07	2.31888e+07	9.41944	0.0115	1.30748	1.30742	2.54637	C16H35NO	Long-chain alkyl amine oxides	ONHFWHCMZAJCFB-UHFFFAOYSA-N	CCCCCCCCCCCCCC[N+](C)(C)[O-]	---	18739	---	Organic nitrogen compounds	Organonitrogen compounds	UP
NEG9888	S-Adenosylhomocysteine	6.679	383.114	[M-H]-	383.114	True	1.42103e+07	2.84857e+07	2.60363e+07	1.67505e+07	1.87033e+07	2.16194e+07	0.448378	1.20428	0.268176	1.90244e+07	2.45028e+06	1.41467e+06	12.8797	2.29108e+07	7.6337e+06	4.40732e+06	33.3193	0.596211	0.529193	0.529286	0.348356	C14H20N6O5S	Gamma butyrolactones	ZJUKTBDSGOFHSH-UHFFFAOYSA-N	O=C(O)C(N)CCSCC1OC(N2C=NC=3C(=NC=NC32)N)C(O)C1O	C00021	439155	HMDB0000939	Organoheterocyclic compounds	Lactones	NoSig
POS681	Benzeneacetonitrile	7.18	118.065	[M+H]+	118.066	True	4.14966e+08	4.37256e+08	4.02574e+08	3.15775e+08	3.53978e+08	3.84437e+08	0.0400218	1.19029	0.251317	3.51397e+08	3.44035e+07	1.98629e+07	9.79052	4.18265e+08	1.75747e+07	1.01468e+07	4.20182	0.0902336	1.13758	1.13749	1.3977	C8H7N	Benzene and substituted derivatives	SUSQOBVLVYHIEX-UHFFFAOYSA-N	N#CCC1=CC=CC=C1	C16074	8794	HMDB0034171	Benzenoids	Benzene and substituted derivatives	UP
POS892	Baikiain	1.355	128.071	[M+Na]+	128.071	True	1.90682e+08	2.07469e+08	3.32384e+08	1.60334e+08	1.97939e+08	3.42032e+08	0.894244	1.04317	0.060969	2.33435e+08	9.59088e+07	5.53729e+07	41.0858	2.43512e+08	7.74218e+07	4.46995e+07	31.7939	0.943666	0.0970013	0.0965669	0.0485442	C6H9NO2	Carboxylic acids and derivatives	YCQPUTODZKESPK-UHFFFAOYSA-N	OC(=O)C1CC=CCN1	C08268	557590	HMDB0302856	Organic acids and derivatives	Carboxylic acids and derivatives	NoSig
NEG3324	2-Ethylsuberic acid	8.144	201.112	[M-H]-	201.113	True	1.79065e+07	1.60869e+07	1.78519e+07	1.306e+07	1.52757e+07	1.37969e+07	0.0215403	1.23053	0.299276	1.40442e+07	1.12835e+06	651455	8.0343	1.72818e+07	1.03516e+06	597651	5.98991	0.056436	1.19993	1.20008	1.66675	C10H18O4	Fatty Acyls	WUDDSDIHJHPJRP-UHFFFAOYSA-N	CCC(CCCCCC(O)=O)C(O)=O	---	19872	HMDB0059708	Lipids and lipid-like molecules	Fatty Acyls	UP
POS4918	C17-Sphinganine	10.921	288.29	[M+H]+	288.29	True	2.36177e+08	2.51119e+08	2.93058e+08	8.40978e+07	8.42894e+07	9.58364e+07	0.000595312	2.95338	1.56237	8.80745e+07	6.72268e+06	3.88134e+06	7.63295	2.60118e+08	2.94889e+07	1.70254e+07	11.3367	0.00371159	1.34007	1.34005	3.22526	C17H37NO2	Alkanolamines	KFQUQCFJDMSIJF-UHFFFAOYSA-N	CCCCCCCCCCCCCC[C@H]([C@H](CO)N)O	---	3247037	---	Organic nitrogen compounds	Organonitrogen compounds	UP
NEG6939	N-Acetyl-D-mannosamine 6-phosphate	0.943	300.048	[M-H]-	300.048	True	2.11684e+08	1.20022e+08	1.13522e+08	9.70361e+07	1.22709e+08	1.72159e+08	0.669138	1.13606	0.184045	1.30635e+08	3.81832e+07	2.20451e+07	29.229	1.48409e+08	5.48941e+07	3.16931e+07	36.9883	0.777432	0.307177	0.306756	0.174485	C8H16NO9P	Organooxygen compounds	BRGMHAYQAZFZDJ-UOLFYFMNSA-N	CC(=O)N[C@@H]1[C@@H](O)O[C@H](COP(O)(O)=O)[C@@H](O)[C@@H]1O	C04257	440273	HMDB0001121	Organic oxygen compounds	Organooxygen compounds	NoSig
NEG174	Alanine	1.002	88.0388	[M-H]-	88.0404	True	2.93543e+08	2.77298e+08	2.84913e+08	2.99705e+08	3.17402e+08	2.60585e+08	0.696357	0.975004	-0.0365195	2.92564e+08	2.90741e+07	1.67859e+07	9.93767	2.85251e+08	8.12815e+06	4.69279e+06	2.84947	0.795278	0.28143	0.280742	0.157168	C3H7NO2	Amino acids and derivatives	QNAYBMKLOCPYGJ-REOHCLBHSA-N	C[C@H](C(=O)O)N	C00041	71080;7311725	HMDB0000161	Organic acids and derivatives	Carboxylic acids and derivatives	NoSig
POS732	Threonine	1.328	120.066	[M+H]+	120.065	True	1.01215e+09	8.46231e+08	8.04326e+08	1.07288e+09	9.15568e+08	9.17481e+08	0.379388	0.916302	-0.126105	9.68642e+08	9.02762e+07	5.2121e+07	9.31987	8.87569e+08	1.09906e+08	6.34545e+07	12.3829	0.531297	0.605077	0.605275	0.420916	C4H9NO3	Amino acids and derivatives	AYFVYJQAPQTCCC-GBXIJSLDSA-N	O=C(O)C(N)C(O)C	C00188	---	HMDB0000167	Organic acids and derivatives	Carboxylic acids and derivatives	NoSig
NEG3307	4-Ethylphenylsulfate	9.858	201.022	[M-H]-	201.022	True	2.80425e+08	2.69023e+08	2.65897e+08	2.54686e+08	2.37277e+08	2.78626e+08	0.307694	1.05808	0.081449	2.56863e+08	2.07605e+07	1.19861e+07	8.08234	2.71782e+08	7.64702e+06	4.41501e+06	2.81366	0.453488	0.690279	0.68955	0.511881	C8H10O4S	Phenylsulfates	DWZGLEPNCRFCEP-UHFFFAOYSA-N	CCC1=CC=C(OS(O)(=O)=O)C=C1	---	20822574	HMDB0062551	Organic acids and derivatives	Organic sulfuric acids and derivatives	NoSig
POS696	3-Amino-2,2-dimethylpropanoic acid	6.773	118.086	[M+Na]+	118.086	True	6.59731e+07	1.11118e+08	7.55698e+07	1.26751e+08	1.12031e+08	5.76618e+07	0.592129	0.852307	-0.230555	9.88146e+07	3.63915e+07	2.10106e+07	36.828	8.42204e+07	2.37834e+07	1.37314e+07	28.2395	0.722435	0.382311	0.381727	0.227583	C5H11NO2	Carboxylic acids and derivatives	DGNHGRLDBKAPEH-UHFFFAOYSA-N	CC(C)(CN)C(O)=O	---	95739;36689718	HMDB0245805	Organic acids and derivatives	Carboxylic acids and derivatives	NoSig
NEG717	Trifluoroacetic acid	1.406	112.984	[M-H]-	112.986	True	7.86174e+09	8.04815e+09	7.57826e+09	8.97251e+09	9.11405e+09	9826017153	0.00770536	0.84149	-0.248982	9.30419e+09	4.57422e+08	2.64093e+08	4.9163	7.82938e+09	2.36611e+08	1.36608e+08	3.02209	0.0248442	1.268	1.26817	2.11321	C2HF3O2	Alpha-halocarboxylic acids	DTQVDTLACAAQTR-UHFFFAOYSA-N	C(=O)(C(F)(F)F)O	---	6422;23138861	HMDB0014118	Organic acids and derivatives	Carboxylic acids and derivatives	DOWN
POS4819	Dimethylaminopropyl Lauramide	10.235	285.29	[M+H]+	285.29	True	9.37471e+06	1.13792e+07	6.46556e+06	5.65174e+07	5.86629e+07	5.1771e+07	4.77897e-05	0.163038	-2.61672	5.56505e+07	3.52679e+06	2.03619e+06	6.33739	9.07314e+06	2.47064e+06	1.42642e+06	27.2302	0.000811097	1.35973	1.35966	4.32067	C17H36N2O	N-acyl amines	TWMFGCHRALXDAR-UHFFFAOYSA-N	CCCCCCCCCCCC(=O)NCCCN(C)C	---	51392	---	Lipids and lipid-like molecules	Fatty Acyls	DOWN
NEG2369	cis-Aconitate	3.308	173.008	[M-H]-	173.009	True	1.25429e+08	2.05221e+08	2.14694e+08	3.52987e+07	5.54412e+07	9.31073e+07	0.0217232	2.96629	1.56866	6.12824e+07	2.93436e+07	1.69415e+07	47.8826	1.81782e+08	4.90318e+07	2.83085e+07	26.9729	0.0564707	1.19938	1.19935	1.66308	C6H6O6	Tricarboxylic acids and derivatives	GTZCVFVGUGFEME-IWQZZHSRSA-N	O=C(O)C=C(C(=O)O)CC(=O)O	C00417	643757	HMDB0000072	Organic acids and derivatives	Carboxylic acids and derivatives	UP
POS4782	Metolachlor	12.378	284.141	[M+H]+	284.141	True	6.76226e+07	9.17093e+07	6.93823e+07	5.96519e+07	7.47457e+07	8.38873e+07	0.75696	1.04778	0.0673341	7.27616e+07	1.22389e+07	7.06614e+06	16.8206	7.62381e+07	1.34273e+07	7.75227e+06	17.6124	0.847871	0.223499	0.223544	0.120927	C15H22ClNO2	Anilides	WVQBLGZPHOPPFO-UHFFFAOYSA-N	CCc1cccc(C)c1N(C(C)COC)C(=O)CCl	C10953	4169	HMDB0254678	Benzenoids	Benzene and substituted derivatives	NoSig
POS2077	2-isopentyl-3,6-dimethyl pyrazine	11.98	179.154	[M+H]+	179.154	True	1.14963e+08	1.24266e+08	1.14513e+08	7.17646e+07	6.72676e+07	6.2832e+07	0.000245567	1.75238	0.809313	6.72881e+07	4.46638e+06	2.57866e+06	6.63769	1.17914e+08	5.50559e+06	3.17866e+06	4.66916	0.0021874	1.34979	1.34985	3.60983	C11H18N2	Diazines	WWAYKGYKYHEINT-UHFFFAOYSA-N	CC(C)CCC1=NC(C)=CN=C1C	---	519564	HMDB0303880	Organoheterocyclic compounds	Diazines	UP
POS1039	Dehydro-P-Cymene	10.88	133.101	[M+H]+	133.102	True	2.68371e+08	2.95949e+08	2.80727e+08	3.0333e+08	3.24767e+08	2.67764e+08	0.410256	0.94328	-0.0842423	2.9862e+08	2.87922e+07	1.66232e+07	9.64175	2.81682e+08	1.38141e+07	7.97557e+06	4.90414	0.558277	0.57153	0.57075	0.386945	C10H12	Benzene and substituted derivatives	MMSLOZQEMPDGPI-UHFFFAOYSA-N	CC(=C)C1=CC=C(C)C=C1	---	62385	HMDB0029641	Benzenoids	Benzene and substituted derivatives	NoSig
NEG1179	Leucinic acid	8.305	131.07	[M-H]-	131.071	True	1.88421e+08	1.91314e+08	1.41919e+08	1.56951e+08	1.5599e+08	1.62533e+08	0.394056	1.09713	0.133729	1.58491e+08	3.53266e+06	2.03958e+06	2.22893	1.73885e+08	2.77207e+07	1.60045e+07	15.942	0.545516	0.5888	0.588754	0.404442	C6H12O3	Fatty Acyls	LVRFTAZAXQPQHI-UHFFFAOYSA-N	O=C(O)C(O)CC(C)C	C03264	83697	HMDB0000665	Lipids and lipid-like molecules	Fatty Acyls	NoSig
POS421	4-Hydroxybenzaldehyde	8.012	105.034	[M+H-H2O]+	105.033	True	6.25493e+07	6.18334e+07	6.41898e+07	4.45781e+07	4.48052e+07	4.66836e+07	5.43991e-05	1.38588	0.470803	4.53556e+07	1.15567e+06	667227	2.54802	6.28575e+07	1.20808e+06	697487	1.92194	0.000889371	1.35919	1.35914	4.26441	C7H6O2	Aldehydes	RGHHSNMVTDWUBI-UHFFFAOYSA-N	O=Cc1ccc(O)cc1	C00633	---	HMDB0011718	Organic oxygen compounds	Organooxygen compounds	UP
NEG5881	Ensulizole	7.22	273.034	[M-H]-	273.034	True	1.17314e+07	1.0734e+07	1.10782e+07	1.23952e+07	1.21397e+07	1.22179e+07	0.0239983	0.912681	-0.131818	1.22509e+07	130933	75594	1.06876	1.11812e+07	506654	292517	4.53132	0.0614799	1.19041	1.19057	1.61982	C13H10N2O3S	Phenylbenzimidazoles	UVCJGUGAGLDPAA-UHFFFAOYSA-N	C1=CC=C(C=C1)C2=NC3=C(N2)C=C(C=C3)S(=O)(=O)O	---	33919	---	Organoheterocyclic compounds	Benzimidazoles	DOWN
POS6319	Prostaglandin B1	10.213	337.236	[M+H]+	337.237	True	3.28719e+07	3.89622e+07	39826598	2.35739e+07	2.21572e+07	2.1652e+07	0.00285295	1.6571	0.728665	2.2461e+07	996305	575217	4.43571	3.72202e+07	3.79048e+06	2.18844e+06	10.1839	0.0115059	1.30724	1.30731	2.54471	C20H32O4	Prostaglandins and related compounds	YBHMPNRDOVPQIN-VSOYFRJCSA-N	CCCCCC(O)C=CC1=C(CCCCCCC(=O)O)C(=O)CC1	C00959	5280388	HMDB0002982	Lipids and lipid-like molecules	Fatty Acyls	UP
POS5936	CMP	2.743	324.059	[M+H]+	324.059	True	1.00209e+09	7.21624e+08	8.60011e+08	8.04175e+08	7.95931e+08	8.4638e+08	0.60861	1.0561	0.0787404	8.15495e+08	2.70626e+07	1.56246e+07	3.31855	8.61241e+08	1.40236e+08	8.09651e+07	16.283	0.730571	0.365878	0.36549	0.215661	C9H14N3O8P	Pyrimidine ribonucleoside monophosphates	IERHLVCPSMICTF-KWRCWRNTNA-N	NC1=NC(=O)N(C=C1)[C@@H]1O[C@H](COP(O)(O)=O)[C@@H](O)[C@H]1O	C00055	6131	HMDB0000095	Nucleosides, nucleotides, and analogues	Pyrimidine nucleotides	NoSig
NEG493	GABA	0.915	102.055	[M-H]-	102.056	True	1.56917e+08	1.73525e+08	1.98797e+08	1.95144e+08	1.95277e+08	1.81954e+08	0.329192	0.924636	-0.113042	1.90792e+08	7.65373e+06	4.41888e+06	4.01156	1.76413e+08	2.10887e+07	1.21756e+07	11.9542	0.476975	0.663864	0.663597	0.48255	C4H9NO2	Amino acids and derivatives	BTCSSZJGUNDROE-UHFFFAOYSA-N	O=C(O)CCCN	C00334	119;6992099	HMDB0000112	Organic acids and derivatives	Carboxylic acids and derivatives	NoSig
POS4339	C17 Sphingosine	10.769	268.263	[M+H-H2O]+	268.263	True	1.24234e+09	1.35864e+09	1.51091e+09	5.19242e+08	4.93905e+08	5.65623e+08	0.000468043	2.60449	1.381	5.26257e+08	3.63699e+07	2.09982e+07	6.91106	1.37063e+09	1.34685e+08	7.77605e+07	9.82651	0.0032132	1.34318	1.34316	3.32971	C17H35NO2	Alkanolamines	RBEJCQPPFCKTRZ-BUHFOSPRSA-N	CCCCCCCCCCCC/C=C/[C@H]([C@H](CO)N)O	---	5283557	---	Organic nitrogen compounds	Organonitrogen compounds	UP
NEG1097	Pyroglutamic acid	2.378	128.034	[M-H]-	128.035	True	4.99706e+09	4.77651e+09	5.76277e+09	4.81736e+09	5.10865e+09	4.99728e+09	0.546617	1.04108	0.0580808	4.97443e+09	1.46985e+08	8.4862e+07	2.95482	5.17878e+09	5.17636e+08	2.98857e+08	9.99532	0.684391	0.427163	0.427198	0.262317	C5H7NO3	Amino acids and derivatives	ODHCTXKNWHHXJC-VKHMYHEASA-N	O=C(O)C1N=C(O)CC1	C01879	7405	HMDB0000267	Organic acids and derivatives	Carboxylic acids and derivatives	NoSig
POS3003	Serylleucine	6.934	219.134	[M+H]+	219.134	True	9.85405e+07	9.21677e+07	9.33067e+07	9.76175e+06	6.90086e+06	1.27641e+07	5.18491e-06	9.65159	3.27077	9.80892e+06	2.93192e+06	1.69275e+06	29.8904	9.46716e+07	3.39857e+06	1.96216e+06	3.58985	0.000280487	1.36488	1.36484	5.28526	C9H18N2O4	Peptides	NFDYGNFETJVMSE-UHFFFAOYSA-N	CC(C)C[C@@H](C(=O)O)NC(=O)[C@H](CO)N	---	7015695	HMDB0029043	Organic acids and derivatives	Carboxylic acids and derivatives	UP
POS1167	5-Methylpyrazine-2-carboxylic Acid	5.057	139.05	[M+H-H2O]+	139.05	True	2.82188e+07	1.72728e+07	3.47163e+07	2.65419e+07	2.42054e+07	4.83728e+07	0.53198	0.809199	-0.305434	3.30401e+07	1.33299e+07	7.696e+06	40.3445	2.6736e+07	8.81577e+06	5.08979e+06	32.9734	0.672961	0.441374	0.44204	0.274104	C6H6N2O2	Diazines	RBYJWCRKFLGNDB-UHFFFAOYSA-N	CC1=NC=C(N=C1)C(O)=O	---	122831	HMDB0246827	Organoheterocyclic compounds	Diazines	NoSig
NEG16287	PI(18:0/20:4)	11.132	885.548	[M-H]-	885.55	True	3.11013e+07	2.30172e+07	5.14333e+07	4.27585e+07	4.10657e+07	4.80263e+07	0.371096	0.800541	-0.320952	4.39502e+07	3.63009e+06	2.09583e+06	8.25956	3.51839e+07	1.46414e+07	8.45321e+06	41.6139	0.523044	0.614457	0.614713	0.430514	C47H83O13P	Phosphatidylinositols	KRTOMQDUKGRFDJ-ZAHDIIMDSA-N	CCCCCCCCCCCCCCCCCC(=O)OCC(COP(O)(=O)OC1C(O)C(O)C(O)C(O)C1O)OC(=O)CCCCCC\C=C/C\C=C/C\C=C/C\C=C/CC	---	---	HMDB0009815	Lipids and lipid-like molecules	Glycerophospholipids	NoSig
POS1868	Indole-3-acrylic acid	7.18	170.06	[M+H-H2O]+	170.06	True	1.17803e+08	1.30326e+08	1.21184e+08	9.87985e+07	1.05787e+08	1.09699e+08	0.0202617	1.17509	0.232765	1.04762e+08	5.52237e+06	3.18834e+06	5.27136	1.23104e+08	6.47851e+06	3.74037e+06	5.26263	0.0537089	1.20519	1.20522	1.69332	C11H9NO2	Indoles	PLVPPLCLBIEYEA-AATRIKPKSA-N	O=C(O)C=Cc1c[nH]c2ccccc12	C21283	5375048	HMDB0000734	Organoheterocyclic compounds	Indoles and derivatives	UP
POS3947	16-Hydroxypalmitic acid	11.865	255.231	[M+H-H2O]+	255.232	True	1.32397e+06	1.33832e+08	9.57663e+07	1.57469e+06	6.43567e+07	1.01774e+08	0.689619	1.37695	0.461475	5.59018e+07	5.06319e+07	2.92323e+07	90.5729	7.69739e+07	6.82234e+07	3.93888e+07	88.6318	0.792123	0.287082	0.287161	0.161391	C16H32O3	Long-chain fatty acids	UGAGPNKCDRTDHP-GPQMBLKYNA-N	O=C(O)CCCCCCCCCCCCCCCO	C18218	---	HMDB0006294	Lipids and lipid-like molecules	Fatty Acyls	NoSig
POS1126	alpha-Pinene	1.003	137.132	[M+H]+	137.132	True	3.04965e+08	2.38415e+08	2.19422e+08	1.80682e+08	1.41235e+08	1.57198e+08	0.0289649	1.5921	0.670935	1.59705e+08	1.98429e+07	1.14563e+07	12.4247	2.54267e+08	4.4921e+07	2.59352e+07	17.6668	0.0703681	1.17287	1.17269	1.53813	C10H16	Bicyclic monoterpenoids	GRWFGVWFFZKLTI-RKDXNWHRSA-N	CC1=CCC2CC1C2(C)C	C06306	6654	HMDB0006525	Lipids and lipid-like molecules	Prenol lipids	UP
NEG4053	4'-Hydroxychalcone	2.647	223.075	[M-H]-	223.076	True	5.96738e+06	9.4413e+06	8.42832e+06	8.90169e+06	1.01246e+07	9.28902e+06	0.243687	0.841843	-0.248377	9.43842e+06	624981	360833	6.62167	7.94567e+06	1.78655e+06	1.03146e+06	22.4845	0.374573	0.7716	0.771225	0.613168	C15H12O2	Retrochalcones	UAHGNXFYLAJDIN-IZZDOVSWSA-N	O=C(C=CC=1C=CC=CC1)C2=CC=C(O)C=C2	C14232	5282362	---	Phenylpropanoids and polyketides	Linear 1,3-diarylpropanoids	NoSig
POS2594	Capric dimethyl amine oxide	9.624	202.216	[M+H]+	202.217	True	2.80621e+08	2.75407e+08	2.81447e+08	3.45143e+08	3.4461e+08	3.19767e+08	0.00260765	0.829577	-0.269552	3.36506e+08	1.44996e+07	8.37133e+06	4.30885	2.79158e+08	3.2748e+06	1.89071e+06	1.1731	0.0107291	1.31014	1.30997	2.58375	C12H27NO	Long-chain alkyl amine oxides	ZRKZFNZPJKEWPC-UHFFFAOYSA-N	CCCCCCCCCC[N+](C)(C)[O-]	---	62452	---	Organic nitrogen compounds	Organonitrogen compounds	DOWN
NEG202	Methoxyacetic acid	1.746	89.0228	[M-H]-	89.0239	True	4.67051e+10	4.97252e+10	4.83319e+10	4.47672e+10	4.6828e+10	4.7876e+10	0.235136	1.03794	0.0537183	4.64904e+10	1.58166e+09	9.13175e+08	3.40213	4.82541e+10	1.5116e+09	8.72724e+08	3.13259	0.3665	0.782688	0.782737	0.628681	C3H6O3	Carboxylic acids and derivatives	RMIODHQZRUFFFF-UHFFFAOYSA-N	COCC(O)=O	---	12251	HMDB0041929	Organic acids and derivatives	Carboxylic acids and derivatives	NoSig
NEG7245	N-Acetylneuraminic acid	0.995	308.099	[M-H]-	308.099	True	9.93852e+07	1.04799e+08	1.02335e+08	1.87215e+08	1.72551e+08	1.92307e+08	0.000181337	0.555215	-0.848882	1.84024e+08	1.0257e+07	5.92189e+06	5.57373	1.02173e+08	2.71064e+06	1.56499e+06	2.65299	0.00183135	1.35221	1.35232	3.74151	C11H19NO9	Sugar acids and derivatives	SQVRNKJHWKZAKO-LUWBGTNYSA-N	O=C(O)C1(O)OC(C(O)C(O)CO)C(N=C(O)C)C(O)C1	C00270	439197	HMDB0000230	Organic oxygen compounds	Organooxygen compounds	DOWN
NEG2307	p-Toluenesulfonic acid	7.453	171.011	[M-H]-	171.012	True	9.00321e+06	8.49345e+06	9.16938e+06	1.24101e+08	1.20878e+08	1.20508e+08	6.647e-08	0.0729604	-3.77674	1.21829e+08	1.97612e+06	1.14091e+06	1.62204	8.88868e+06	352217	203353	3.96254	3.80252e-05	1.36709	1.36709	7.17737	C7H8O3S	p-Methylbenzenesulfonates	JOXIMZWYDAKGHI-UHFFFAOYSA-N	CC1=CC=C(C=C1)S(=O)(=O)O	C06677	6101;20307553	HMDB0059933	Benzenoids	Benzene and substituted derivatives	DOWN
POS7985	Cholic acid	10.649	391.285	[M+H-H2O]+	391.285	True	2.54333e+07	3.3737e+07	2.13682e+07	2.82857e+07	3.98784e+07	2.1898e+07	0.645826	0.894255	-0.161241	3.00207e+07	9.11486e+06	5.26247e+06	30.3619	2.68462e+07	6.30426e+06	3.63977e+06	23.4829	0.760307	0.330015	0.329223	0.189885	C24H40O5	Hydroxy bile acids, alcohols and derivatives	BHQCQFFYRZLCQQ-OELDTZBJSA-N	C[C@H](CCC(=O)O)[C@H]1CC[C@@H]2[C@@]1([C@H](C[C@H]3[C@H]2[C@@H](C[C@H]4[C@@]3(CC[C@H](C4)O)C)O)O)C	C00695	221493	HMDB0000619	Lipids and lipid-like molecules	Steroids and steroid derivatives	NoSig
POS2806	Cyclo(Pro-Leu)	8.524	211.144	[M+H]+	211.144	True	5.44423e+06	5.28811e+06	4.32475e+06	3.00555e+06	2.89173e+06	3.25307e+06	0.00576712	1.64552	0.718545	3.05012e+06	184749	106665	6.0571	5.01903e+06	606309	350053	12.0802	0.0197961	1.28178	1.2817	2.23904	C11H18N2O2	Amino acids and derivatives	SZJNCZMRZAUNQT-UHFFFAOYSA-N	O=C1N2CCCC2C(O)=NC1CC(C)C	---	---	HMDB0034276	Organic acids and derivatives	Carboxylic acids and derivatives	UP
POS4598	PyroGlu-Phe	8.267	277.118	[M+H]+	277.118	True	1.56245e+07	1.72881e+07	1.65754e+07	1.81473e+07	1.75284e+07	1.80109e+07	0.053756	0.921796	-0.117481	1.78955e+07	325196	187752	1.81719	1.6496e+07	834663	481893	5.05978	0.114842	1.09963	1.09964	1.26957	C14H16N2O4	Peptides	XCEZCXFVJLMPKG-QWRGUYRKSA-N	O=C(N[C@@](C(O)=O)([H])CC1=CC=CC=C1)[C@H]2NC(CC2)=O	---	7408331	---	Organic acids and derivatives	Carboxylic acids and derivatives	NoSig
POS190	beta-Alanine	1.307	90.0555	[M+H]+	90.055	True	1.89002e+09	2.27378e+09	1.14671e+09	1.62903e+09	1.82186e+09	1.85015e+09	0.993006	1.00178	0.00257153	1767014925	1.20329e+08	6.94718e+07	6.80971	1.77017e+09	5.73011e+08	3.30828e+08	32.3704	0.997043	0.00625829	0.00637567	0.00304812	C3H7NO2	Amino acids and derivatives	UCMIRNVEIXFBKS-JSWHHWTPNA-N	O=C(O)CCN	C00099	239	HMDB0000056	Organic acids and derivatives	Carboxylic acids and derivatives	NoSig
NEG5379	Glutamylleucine	7.123	259.13	[M-H]-	259.13	True	1.37974e+08	1.26586e+08	1.09506e+08	8.98647e+07	8.40552e+07	1.02263e+08	0.029701	1.35441	0.437669	9.20609e+07	9.30041e+06	5.36959e+06	10.1024	1.24689e+08	1.43283e+07	8.27242e+06	11.4912	0.0713156	1.17043	1.17017	1.52723	C11H20N2O5	Peptides	MYFMARDICOWMQP-JAMMHHFISA-N	O=C(O)C(N=C(O)CCC(N)C(=O)O)CC(C)C	---	151023	HMDB0011171	Organic acids and derivatives	Carboxylic acids and derivatives	UP
POS5110	Colneleic acid	10.215	295.226	[M+H]+	295.227	True	2.02136e+07	16871336	2.56193e+07	3.97366e+07	3.74497e+07	4.05423e+07	0.0024924	0.532617	-0.908829	3.92429e+07	1.60429e+06	926237	4.08811	2.09014e+07	4.41435e+06	2.54863e+06	21.1199	0.0104305	1.31114	1.31126	2.60338	C18H30O3	Fatty Acyls	HHZKKFXQEIBVEV-CXXUKANQSA-N	CCCCC\C=C/C=C/O\C=C\CCCCCCC(O)=O	C19827	6441681	HMDB0030995	Lipids and lipid-like molecules	Fatty Acyls	DOWN
POS857	3-(Hydroxymethyl)furan-2-carbaldehyde	1.075	127.039	[M+H]+	127.039	True	1.3142e+08	82545234	9.3089e+07	1.54777e+08	8.96142e+07	74263565	0.899695	0.963597	-0.0534976	1.06218e+08	4.27475e+07	2.46803e+07	40.2451	1.02352e+08	2.57203e+07	1.48496e+07	25.1294	0.948557	0.09148	0.0915741	0.0459048	C6H6O3	Organooxygen compounds	CETXOEGRUBXUAL-UHFFFAOYSA-N	OCC1=C(OC=C1)C=O	---	16730373	HMDB0246148	Organic oxygen compounds	Organooxygen compounds	NoSig
NEG3429	Panthenol	6.876	204.123	[M-H]-	204.124	True	6.35841e+06	5.15529e+06	6.73877e+06	5.81876e+06	5.65644e+06	4.83079e+06	0.316202	1.11937	0.162691	5.43533e+06	529801	305881	9.74737	6.08416e+06	826600	477238	13.5861	0.463318	0.679082	0.679202	0.500036	C9H19NO4	N-acyl amines	SNPLKNRPJHDVJA-ZETCQYMHSA-N	CC(C)(CO)C(O)C(=O)NCCCO	C05944	4678	HMDB0004231	Organooxygen compounds	Fatty Acyls	NoSig
POS4807	Xanthosine	6.795	285.083	[M+H]+	285.083	True	1.46132e+08	1.24684e+08	1.20484e+08	1.36709e+08	1.63358e+08	1.43454e+08	0.197432	0.882259	-0.180725	1.4784e+08	1.38553e+07	7.99936e+06	9.3718	1.30434e+08	1.37569e+07	7.94258e+06	10.5471	0.323841	0.835925	0.835642	0.704583	C10H12N4O6	Purine nucleosides	UBORTCNDUKBEOP-UUOKFMHZSA-N	OCC1OC(n2cnc3c(O)nc(O)nc32)C(O)C1O	C01762	64959	HMDB0000299	Nucleosides, nucleotides, and analogues	Purine nucleosides	NoSig
POS3400	Lidocaine	7.911	235.18	[M+H]+	235.18	True	1.58533e+07	1.7395e+07	1.67755e+07	2.01986e+07	2.08e+07	2.17022e+07	0.00250701	0.797818	-0.325868	2.09003e+07	756793	436935	3.62097	1.66746e+07	775803	447910	4.65261	0.0104418	1.31106	1.31109	2.60084	C14H22N2O	m-Xylenes	NNJVILVZKWQKPM-UHFFFAOYSA-N	CCN(CC)CC(=O)NC1=C(C)C=CC=C1C	C07073	3676	HMDB0014426	Benzenoids	Benzene and substituted derivatives	DOWN
POS1595	2,2,6,6-Tetramethylpiperidin-1-ol	14.409	158.154	[M+Na]+	158.154	True	1.38879e+09	3.18566e+09	6.70165e+08	1.88223e+09	1.09232e+09	1.20499e+09	0.675544	1.25483	0.327495	1.39318e+09	4.27264e+08	2.46681e+08	30.6683	1.7482e+09	1.29569e+09	7.48067e+08	74.1155	0.783221	0.300493	0.300614	0.170347	C9H19NO	Piperidines	VUZNLSBZRVZGIK-UHFFFAOYSA-N	CC1(C)CCCC(C)(C)N1O	---	549976	HMDB0245345	Organoheterocyclic compounds	Piperidines	NoSig
POS5569	gamma-Glutamyltyrosine	6.919	311.123	[M+H]+	311.124	True	9.24598e+07	8.37391e+07	8.80292e+07	5.28691e+07	6.18107e+07	6.38306e+07	0.00244998	1.48018	0.565775	5.95035e+07	5.8336e+06	3.36803e+06	9.80379	8.8076e+07	4.36055e+06	2.51756e+06	4.95089	0.0102882	1.31179	1.31174	2.61084	C14H18N2O6	Peptides	VVLXCWVSSLFQDS-QWRGUYRKSA-N	O=C(O)C(N=C(O)CCC(N)C(=O)O)CC1=CC=C(O)C=C1	---	94340	HMDB0011741	Organic acids and derivatives	Carboxylic acids and derivatives	UP
POS321	1-Pyrrolidinecarboxaldehyde	11.315	100.076	[M+H-H2O]+	100.076	True	4.18583e+08	9.00847e+08	5.24831e+08	3.63116e+08	9.49963e+08	5.11563e+08	0.978585	1.01075	0.0154292	6.08214e+08	3.05129e+08	1.76166e+08	50.168	6.14754e+08	2.53396e+08	1.46298e+08	41.2191	0.993815	0.0188236	0.0195229	0.00940141	C5H9NO	Pyrrolidines	AGRIQBHIKABLPJ-UHFFFAOYSA-N	O=CN1CCCC1	---	77372	HMDB0034587	Organoheterocyclic compounds	Pyrrolidines	NoSig
POS3297	Lauramine oxide	10.287	230.247	[M+H]+	230.248	True	2.22703e+09	2.34744e+09	2.45759e+09	2.16321e+09	2.06507e+09	2.04269e+09	0.0290894	1.12137	0.165261	2.09032e+09	6.4104e+07	3.70105e+07	3.0667	2.34402e+09	1.15314e+08	6.65768e+07	4.91951	0.0704769	1.17221	1.17227	1.53627	C14H31NO	Long-chain alkyl amine oxides	SYELZBGXAIXKHU-UHFFFAOYSA-N	CCCCCCCCCCCCN(C)(C)=O	---	15433	---	Organic nitrogen compounds	Organonitrogen compounds	UP
NEG13762	LPC(18:2)	12.17	564.329	[M+HCOO]-	564.329	True	6.53146e+07	6.24526e+07	6.06748e+07	1.51816e+08	7.69817e+07	7.8837e+07	0.182697	0.61255	-0.7071	1.02545e+08	4.26804e+07	2.46415e+07	41.6211	6.2814e+07	2.34089e+06	1.35152e+06	3.72671	0.30667	0.85731	0.857422	0.738268	C26H50NO7P	Lysophosphatidylcholines	SPJFYYJXNPEZDW-FTJOPAKQSA-N	C([C@H](COP(=O)([O-])OCC[N+](C)(C)C)O)OC(CCCCCCC/C=C\C/C=C\CCCCC)=O	---	11005824	HMDB0010386	Lipids and lipid-like molecules	Glycerophospholipids	NoSig
POS6507	Lauramidopropylbetaine	10.629	343.296	[M]+	343.296	True	7.43139e+07	7.73742e+07	7.7698e+07	1.33463e+08	1.46507e+08	1.30973e+08	0.000254182	0.558195	-0.84116	1.36981e+08	8.34337e+06	4.81705e+06	6.09089	7.64621e+07	1.86739e+06	1.07814e+06	2.44224	0.0021874	1.34968	1.34954	3.59486	C19H39N2O3	Amino acids and derivatives	MRUAUOIMASANKQ-UHFFFAOYSA-O	CCCCCCCCCCCC(=O)NCCC[N+](C)(C)CC(O)=O	---	20281	---	Organic acids and derivatives	Carboxylic acids and derivatives	DOWN
NEG13794	LPC(18:1)	13.519	566.346	[M+FA-H]-	566.346	True	5.3795e+07	3.79186e+07	4.47742e+07	4.65971e+07	3.25709e+07	4.93998e+07	0.723179	1.0616	0.0862425	4.28559e+07	9.01666e+06	5.20577e+06	21.0395	4.54959e+07	7.96278e+06	4.59731e+06	17.5022	0.818263	0.256099	0.255314	0.140754	C26H52NO7P	Lysophosphatidylcholines	YAMUFBLWGFFICM-PTGWMXDISA-N	O=C(OCC(O)COP(=O)([O-])OCC[N+](C)(C)C)CCCCCCCC=CCCCCCCCC	C03916	5313988	HMDB0002815	Lipids and lipid-like molecules	Glycerophospholipids	NoSig
NEG8841	13,14-Dihydro-15-keto-PGE2	10.936	351.217	[M-H]-	351.217	True	4.46341e+07	4.4678e+07	3.88126e+07	4.44815e+07	4.08199e+07	5.05418e+07	0.49603	0.943181	-0.0843933	4.52811e+07	4.91002e+06	2.8348e+06	10.8434	4.27082e+07	3.37379e+06	1.94786e+06	7.89963	0.639397	0.478387	0.479007	0.304492	C20H32O5	Fatty Acyls	CUJMXIQZWPZMNQ-XYYGWQPLSA-N	CCCCCC(=O)CC[C@H]1[C@H](O)CC(=O)[C@@H]1C\C=C/CCCC(O)=O	C04671	5280711	HMDB0002776	Lipids and lipid-like molecules	Fatty Acyls	NoSig
POS1299	Tripropylamine	7.695	144.175	[M+H]+	144.175	True	3.68239e+09	3.77056e+09	3.62711e+09	3.43585e+09	4.12384e+09	4.0976e+09	0.447942	0.950483	-0.0732671	3.88576e+09	3.89859e+08	2.25085e+08	10.033	3.69335e+09	7.23532e+07	4.17731e+07	1.95901	0.596211	0.529917	0.529754	0.348778	C9H21N	Tertiary amines	YFTHZRPMJXBUME-UHFFFAOYSA-N	CCCN(CCC)CCC	---	7616	HMDB0032545	Organic nitrogen compounds	Organonitrogen compounds	NoSig
NEG9733	S-Lactoylglutathione	6.68	378.098	[M-H]-	378.098	True	6.09513e+06	9.6151e+06	8.41553e+06	3.46865e+07	4.70522e+07	4.52128e+07	0.00100727	0.190039	-2.39563	4.23172e+07	6.67206e+06	3.85212e+06	15.7668	8.04192e+06	1.78948e+06	1.03315e+06	22.2518	0.00544637	1.33186	1.33179	2.99686	C13H21N3O8S	Peptides	VDYDCVUWILIYQF-CSMHCCOUSA-N	C[C@@H](O)C(=O)SC[C@H](NC(=O)CC[C@H](N)C(O)=O)C(=O)NCC(O)=O	C03451	440018	HMDB0001066	Organic acids and derivatives	Carboxylic acids and derivatives	DOWN
POS3651	Uridine	5.158	245.077	[M+H]+	245.077	True	2.25525e+09	2.52097e+09	1.45892e+09	1.03112e+09	1.88719e+09	2.21563e+09	0.483549	1.21449	0.280355	1.71131e+09	6.11529e+08	3.53066e+08	35.7345	2.07838e+09	5.5267e+08	3.19084e+08	26.5914	0.628614	0.492047	0.492026	0.315559	C9H12N2O6	Pyrimidine nucleosides	DRTQHJPVMGBUCF-UHFFFAOYSA-N	O=C1N=C(O)C=CN1C2OC(CO)C(O)C2O	C00299	6029	HMDB0000296	Nucleosides, nucleotides, and analogues	Pyrimidine nucleosides	NoSig
POS5103	Phenylalanylglutamate	6.921	295.129	[M+H]+	295.129	True	7.2456e+07	7.37498e+07	8.01695e+07	3.35917e+07	3.79874e+07	3.89831e+07	0.000185008	2.0475	1.03386	3.6854e+07	2.86883e+06	1.65632e+06	7.7843	7.54585e+07	4.13084e+06	2.38494e+06	5.47432	0.00183805	1.35217	1.35217	3.73281	C14H18N2O5	Peptides	JXWLMUIXUXLIJR-QWRGUYRKSA-N	C1=CC=C(C=C1)C[C@@H](C(=O)N[C@@H](CCC(=O)O)C(=O)O)N	---	151134	HMDB0028994	Organic acids and derivatives	Carboxylic acids and derivatives	UP
NEG16108	PI(16:0/20:4)	13.508	857.517	[M-H]-	857.518	True	1.52703e+07	1.6307e+07	1.34811e+07	1.70513e+07	1.84354e+07	1.80699e+07	0.0373806	0.841325	-0.249266	1.78522e+07	717269	414116	4.01782	1.50195e+07	1.42958e+06	825366	9.51814	0.0862362	1.14558	1.14544	1.42735	C45H79O13P	Phosphatidylinositols	KIQYUSYSJTUGFZ-LSLODQAYSA-N	CCCCCCCCCCCCCCCC(=O)OCC(COP(O)(=O)OC1C(O)C(O)C(O)C(O)C1O)OC(=O)CCCCCC\C=C/C\C=C/C\C=C/C\C=C/CC	---	138284476	HMDB0009789	Lipids and lipid-like molecules	Glycerophospholipids	DOWN
POS8712	Nonaethylene glycol	7.633	415.254	[M+H]+	415.254	True	5.98558e+06	6.71326e+06	6.22205e+06	5.62259e+06	6.93315e+06	6.26228e+06	0.940934	1.00547	0.00786507	6.27267e+06	655341	378361	10.4476	6.30696e+06	371195	214310	5.88548	0.977745	0.0532746	0.0538714	0.0264407	C18H38O10	Dialkyl ethers	YZUUTMGDONTGTN-UHFFFAOYSA-N	C(COCCOCCOCCOCCOCCOCCOCCOCCO)O	---	4867	---	Organic oxygen compounds	Organooxygen compounds	NoSig
POS2762	Kynurenine	6.909	209.092	[M+H]+	209.092	True	6.72065e+07	5.8253e+07	6.84327e+07	9.27383e+06	4.97563e+07	5.44091e+07	0.141902	1.70922	0.773336	3.78131e+07	2.48249e+07	1.43327e+07	65.6518	6.46307e+07	5.5572e+06	3.20845e+06	8.59839	0.252776	0.921941	0.921931	0.848011	C10H12N2O3	Ketones	YGPSJZOEDVAXAB-QMMMGPOBSA-N	Nc1ccccc1C(=O)CC(N)C(=O)O	C00328	161166	HMDB0000684	Organic oxygen compounds	Organooxygen compounds	NoSig
NEG5292	Diisobutyl adipate	9.724	257.176	[M-H]-	257.175	True	7.9131e+06	9.13308e+06	9.90846e+06	6.70942e+06	8.61155e+06	9.23389e+06	0.449792	1.09773	0.134526	8.18495e+06	1.31519e+06	759325	16.0684	8.98488e+06	1.0059e+06	580757	11.1955	0.597441	0.527757	0.527771	0.346988	C14H26O4	Fatty Acyls	RDOFJDLLWVCMRU-UHFFFAOYSA-N	CC(C)COC(=O)CCCCC(=O)OCC(C)C	C14260	8831	HMDB0041618	Lipids and lipid-like molecules	Fatty Acyls	NoSig
POS4277	Graveolide	10.176	266.172	[M+NH4]+	266.175	True	4.65368e+07	5.18232e+07	5.79067e+07	6.10029e+07	7.85639e+07	6.67879e+07	0.0526092	0.757273	-0.401115	6.87849e+07	8.94919e+06	5.16682e+06	13.0104	5.20889e+07	5.6896e+06	3.28489e+06	10.9229	0.113184	1.10297	1.10262	1.27894	C15H20O3	Sesquiterpene lactones	DCKYPAZZUYXYTC-SCGWIAOYSA-N	O=C1OC2CC(C)C3CCC(=O)C3(C)CC2C1=C	---	11043090	---	Lipids and lipid-like molecules	Prenol lipids	NoSig
POS1497	6-Methoxy-pyridine-3-carboxylic acid	6.752	154.05	[M+H]+	154.05	True	8.18318e+07	9.44627e+07	7.83538e+07	5.38041e+07	6.4091e+07	5.90723e+07	0.0106328	1.43896	0.525023	5.89891e+07	5.14396e+06	2.96987e+06	8.72019	8.48828e+07	8.4768e+06	4.89408e+06	9.98648	0.0320821	1.2504	1.25058	1.97335	C7H7NO3	Pyridinecarboxylic acids	NVDJVEQITUWZDT-UHFFFAOYSA-N	COC1=CC=C(C=N1)C(O)=O	---	592499	HMDB0059749	Organoheterocyclic compounds	Pyridines and derivatives	UP
POS6221	Trp-Glu	7.076	334.139	[M+H]+	334.14	True	4.08072e+07	4.30517e+07	4.04734e+07	2.29768e+07	2.12751e+07	2.35507e+07	5.86958e-05	1.83374	0.874788	2.26009e+07	1.18344e+06	683261	5.23627	4.14441e+07	1.40221e+06	809564	3.38337	0.000919567	1.35886	1.35882	4.23139	C16H19N3O5	Peptides	PWIQCLSQVQBOQV-AAEUAGOBSA-N	C1=CC=C2C(=C1)C(=CN2)C[C@@H](C(=O)N[C@@H](CCC(=O)O)C(=O)O)N	---	7009663	HMDB0029082	Organic acids and derivatives	Carboxylic acids and derivatives	UP
POS2293	Targinine	1.377	189.134	[M+NH4]+	189.135	True	3.22986e+07	4.34858e+07	4.0185e+07	3.78476e+07	4.22249e+07	4.60264e+07	0.453803	0.919669	-0.120813	4.2033e+07	4.09277e+06	2.36296e+06	9.73704	3.86565e+07	5.7481e+06	3.31867e+06	14.8697	0.601193	0.523515	0.523481	0.343133	C7H16N4O2	Carboxylic acids and derivatives	NTNWOCRCBQPEKQ-UHFFFAOYSA-N	CNC(=N)NCCCC(N)C(O)=O	C03884	---	HMDB0029416	Organic acids and derivatives	Carboxylic acids and derivatives	NoSig
POS357	3-Azetidinecarboxylic acid	1.348	102.055	[M+H]+	102.055	True	2.98975e+08	3.90705e+08	3.38991e+08	2.38596e+08	3.11704e+08	3.61271e+08	0.42931	1.12846	0.174355	3.03857e+08	6.17129e+07	3.563e+07	20.3098	3.4289e+08	4.59891e+07	2.65518e+07	13.4122	0.579687	0.5499	0.549875	0.367229	C4H7NO2	Azetidines	GFZWHAAOIVMHOI-UHFFFAOYSA-N	OC(=O)C1CNC1	---	93192;7019175	HMDB0248797	Organoheterocyclic compounds	Azetidines	NoSig
POS4100	Lys-Leu	4.047	260.197	[M+H]+	260.197	True	2.11227e+07	29613299	4.97361e+07	5.17169e+06	1.07404e+07	4.76917e+06	0.0377708	4.85813	2.2804	6.89375e+06	3.33736e+06	1.92682e+06	48.4114	3.34907e+07	1.46955e+07	8.48445e+06	43.8793	0.0867593	1.14412	1.14425	1.42284	C12H25N3O3	Peptides	ATIPDCIQTUXABX-UWVGGRQHSA-N	CC(C)C[C@@H](C(=O)O)NC(=O)[C@H](CCCCN)N	---	7016103	HMDB0028955	Organic acids and derivatives	Carboxylic acids and derivatives	UP
NEG7365	Triptophenolide	13.485	311.168	[M-H]-	311.165	True	3.02817e+08	3.02328e+08	3.29048e+08	2.59384e+08	3.27903e+08	2.89972e+08	0.431079	1.0649	0.0907149	2.9242e+08	3.43248e+07	1.98175e+07	11.7382	3.11397e+08	1.52875e+07	8.82622e+06	4.90931	0.580792	0.547491	0.547953	0.365443	C20H24O3	Oxosteroids	KPXIBWGPZSPABK-FXAWDEMLSA-N	O=C1OCC2=C1CCC3(C4=CC=C(C(O)=C4CCC23)C(C)C)C	---	173273	---	Lipids and lipid-like molecules	Steroids and steroid derivatives	NoSig
NEG6682	Gingerol	11.471	293.176	[M-H]-	293.176	True	1.34978e+08	1.41231e+08	1.49861e+08	2.79738e+07	3.15052e+07	3.78688e+07	2.98875e-05	4.37678	2.12987	3.24493e+07	5.01463e+06	2.8952e+06	15.4537	1.42023e+08	7.47305e+06	4.31457e+06	5.26185	0.000625539	1.36129	1.36127	4.52451	C17H26O4	Gingerols	NLDDIKRKFXEWBK-UHFFFAOYSA-N	CCCCCC(O)CC(=O)CCc1ccc(O)c(OC)c1	C10462	442793	HMDB0005783	Benzenoids	Phenols	UP
POS110	Imidazolone	13.171	85.0403	[M+H]+	85.0402	True	9.50365e+07	5.06653e+07	7.04498e+07	6.10312e+07	7.29366e+07	1.19976e+08	0.599198	0.851177	-0.232469	8.46481e+07	3.1169e+07	1.79954e+07	36.8218	7.20505e+07	2.22289e+07	1.28338e+07	30.8518	0.723915	0.374161	0.374749	0.22243	C3H4N2O	Carboxylic acids and derivatives	CAAMSDWKXXPUJR-UHFFFAOYSA-N	O=C1CN=CN1	C06195	504	HMDB0004363	Organic acids and derivatives	Carboxylic acids and derivatives	NoSig
POS4762	Hexaethylene glycol	7.2	283.175	[M+H]+	283.175	True	2.60852e+07	3.09482e+07	3.06733e+07	3.52703e+07	3.6517e+07	3.8623e+07	0.0151291	0.794371	-0.332116	3.68034e+07	1.69459e+06	978372	4.60444	2.92356e+07	2.73176e+06	1.57718e+06	9.34395	0.0424335	1.22764	1.22766	1.82019	C12H26O7	Dialkyl ethers	IIRDTKBZINWQAW-UHFFFAOYSA-N	C(COCCOCCOCCOCCOCCO)O	---	17472	HMDB0061822	Organic oxygen compounds	Organooxygen compounds	DOWN
POS1659	DL-2-amino-octanoic acid	7.763	160.133	[M+H]+	160.133	True	7.64057e+07	7.37949e+07	7.33069e+07	3.43876e+07	3.78761e+07	3.58608e+07	1.03111e-05	2.06713	1.04763	3.60415e+07	1.75124e+06	1.01108e+06	4.85896	7.45025e+07	1.66619e+06	961976	2.23643	0.000365737	1.36377	1.3638	4.9867	C8H17NO2	Amino acids and derivatives	AKVBCGQVQXPRLD-UHFFFAOYSA-N	O=C(O)C(N)CCCCCC	---	69522	HMDB0000991	Organic acids and derivatives	Carboxylic acids and derivatives	UP
POS1190	Betaine	1.356	140.068	[M+Na]+	140.068	True	5.62458e+07	6.52553e+07	6.86761e+07	3.80809e+07	5.31367e+07	3.93059e+07	0.0308786	1.45703	0.543035	4.35078e+07	8.36128e+06	4.82738e+06	19.2179	6.33924e+07	6.4211e+06	3.70722e+06	10.1291	0.0735548	1.16583	1.1662	1.51034	C5H11NO2	Amino acids and derivatives	KWIUHFFTVRNATP-UHFFFAOYSA-N	O=C([O-])C[N+](C)(C)C	C00719	247	HMDB0000043	Organic acids and derivatives	Carboxylic acids and derivatives	UP
NEG2526	Cyclamic acid	7.429	178.053	[M-H]-	178.054	True	936884	752523	1.08029e+06	1.47191e+06	1.02786e+06	2.43915e+06	0.165864	0.56079	-0.834468	1.64631e+06	721631	416634	43.8334	923232	164309	94864.1	17.7972	0.285875	0.882589	0.883218	0.780248	C6H13NO3S	Cyclamates	HCAJEUSONLESMK-UHFFFAOYSA-N	C1(CCCCC1)NS(O)(=O)=O	C02824	---	HMDB0031340	Organic acids and derivatives	Sulfamic acid derivatives	NoSig
NEG12241	LPE(18:2)	12.121	476.279	[M-H]-	476.278	True	3.99265e+07	3.00449e+07	3.28892e+07	5.43712e+07	5.47321e+07	5.0606e+07	0.00416589	0.644049	-0.634758	5.32364e+07	2.28516e+06	1.31934e+06	4.29247	3.42869e+07	5.08689e+06	2.93692e+06	14.8363	0.0153335	1.29469	1.29467	2.38029	C23H44NO7P	Lysophosphatidylethanolamines	SVRBKLJIDJHADS-USWSLJGRSA-N	CCCCC/C=C\C/C=C\CCCCCCCC(=O)O[C@H](CO)COP(=O)(O)OCCN	---	53480926	HMDB0011477	Lipids and lipid-like molecules	Glycerophospholipids	DOWN
POS8707	Gelomulide N	12.049	415.211	[M-H2O+H]+	415.211	True	4.86433e+07	7.69731e+07	6.92027e+07	8.8059e+07	8.03904e+07	4.4743e+07	0.717978	0.913818	-0.130021	7.10641e+07	2.3115e+07	1.33455e+07	32.527	6.49397e+07	1.46381e+07	8.45131e+06	22.5411	0.814642	0.260842	0.26023	0.143889	C24H32O7	Naphthofurans	YOELDOOOBJSHSZ-SRFZOMHBSA-N	CC(=O)O[C@H]1C[C@H](OC(C)=O)[C@]2(C)[C@H](CC[C@@]34O[C@@H]3C/5=C(C)/C(=O)O[C@@H]5C[C@@H]24)C1(C)C	---	24775138	---	Organoheterocyclic compounds	Naphthofurans	NoSig
NEG802	Norvaline	1.152	116.07	[M-H]-	116.072	True	4.9393e+07	2.27524e+07	2.55918e+07	3.25542e+07	3.80044e+07	2.7759e+07	0.983789	0.994096	-0.00854259	3.27725e+07	5.12619e+06	2.95961e+06	15.6417	3.2579e+07	1.46304e+07	8.44684e+06	44.9072	0.996015	0.0148433	0.0147787	0.0070982	C5H11NO2	Amino acids and derivatives	SNDPXSYFESPGGJ-SCSAIBSYSA-N	CCC[C@@H](C(=O)O)N	C01826	439575	HMDB0013716	Organic acids and derivatives	Carboxylic acids and derivatives	NoSig
POS369	Di-N-propylamine	6.785	102.128	[M+H]+	102.128	True	6.58596e+08	5.36997e+08	6.10934e+08	6.82844e+08	7.95962e+08	6.72051e+08	0.096812	0.839911	-0.251692	7.16952e+08	6.86368e+07	3.96275e+07	9.57341	6.02176e+08	6.12708e+07	3.53747e+07	10.1749	0.186013	1.00378	1.00348	1.01407	C6H15N	Organonitrogen compounds	WEHWNAOGRSTTBQ-UHFFFAOYSA-N	CCCNCCC	---	8902	HMDB0302261	Organic nitrogen compounds	Organonitrogen compounds	NoSig
POS196	Dimethylethanolamine	14.046	90.092	[M+CH3OH+H]+	90.0919	True	1.63609e+07	2.12865e+07	8.08494e+07	3.38828e+07	1.17699e+07	3.4852e+07	0.596534	1.47192	0.557702	2.68349e+07	1.30557e+07	7.53769e+06	48.6518	3.94989e+07	3.58951e+07	2.07241e+07	90.8762	0.723915	0.37765	0.377376	0.224365	C4H11NO	Organonitrogen compounds	UEEJHVSXFDXPFK-UHFFFAOYSA-N	CN(C)CCO	C21521	7902	HMDB0032231	Organic nitrogen compounds	Organonitrogen compounds	NoSig
NEG153	Malonic semialdehyde	6.891	87.0072	[M-H]-	87.0082	True	5.3428e+07	7.9302e+07	1.54267e+08	7.24658e+07	8.50387e+07	4.69385e+07	0.441569	1.4038	0.489337	6.81476e+07	1.94137e+07	1.12085e+07	28.4876	9.56656e+07	5.23732e+07	3.02377e+07	54.7461	0.590369	0.536314	0.536606	0.355002	C3H4O3	Organooxygen compounds	OAKURXIZZOAYBC-UHFFFAOYSA-N	OC(=O)CC=O	C00222	868	HMDB0011111	Organic oxygen compounds	Organooxygen compounds	NoSig
NEG13763	LPC(18:2)	12.292	564.33	[M+FA-H]-	564.334	True	6.65139e+08	3.63082e+08	3.481e+08	3.50248e+08	2.79044e+08	2.53521e+08	0.199861	1.55902	0.640637	2.94271e+08	5.01288e+07	2.89419e+07	17.0349	4.58774e+08	1.78875e+08	1.03273e+08	38.9897	0.326075	0.832253	0.832116	0.699271	C26H50NO7P	Lysophosphatidylcholines	SPJFYYJXNPEZDW-FTJOPAKQSA-N	O=C(OCC(O)COP(=O)([O-])OCC[N+](C)(C)C)CCCCCCCC=CCC=CCCCCC	---	---	HMDB0010386	Lipids and lipid-like molecules	Glycerophospholipids	NoSig
NEG4874	3-(3-Sulfooxyphenyl)propanoic acid	7.904	245.012	[M-H]-	245.013	True	3.97378e+07	4.07917e+07	4.19151e+07	3.76464e+07	3.43934e+07	4.06862e+07	0.167274	1.08621	0.11931	3.75753e+07	3.14701e+06	1.81693e+06	8.3752	4.08149e+07	1.08881e+06	628624	2.66767	0.2879	0.881605	0.881017	0.776572	C9H10O6S	Phenylsulfates	IQWLPDPKVFZEOK-UHFFFAOYSA-N	O=C(O)CCC=1C=CC=C(OS(=O)(=O)O)C1	---	187488	HMDB0094710	Organic acids and derivatives	Organic sulfuric acids and derivatives	NoSig
NEG2786	8-Amino-7-oxononanoic acid	8.102	186.113	[M-H]-	186.113	True	3.26146e+07	3.50435e+07	3.25974e+07	3.90543e+07	3.58534e+07	5.32818e+07	0.160788	0.782088	-0.354597	4.27298e+07	9.27737e+06	5.35629e+06	21.7117	3.34185e+07	1.40732e+06	812518	4.21121	0.279096	0.890669	0.891209	0.793745	C9H17NO3	Fatty Acyls	GUAHPAJOXVYFON-ZETCQYMHSA-N	C[C@H](N)C(=O)CCCCCC(O)=O	C01092	448124;36688192	HMDB0240687	Lipids and lipid-like molecules	Fatty Acyls	NoSig
POS1414	Tropic acid	6.914	149.06	[M+H-H2O]+	149.06	True	2.72895e+08	2.86346e+08	3.21861e+08	2.61617e+08	2.79186e+08	2.79869e+08	0.270846	1.07364	0.102505	2.73557e+08	1.03465e+07	5.97356e+06	3.78221	2.93701e+08	2.5298e+07	1.46058e+07	8.61352	0.410638	0.735607	0.73567	0.567277	C9H10O3	Beta hydroxy acids and derivatives	JACRWUWPXAESPB-UHFFFAOYSA-N	C1=CC=C(C=C1)C(CO)C(=O)O	C01456	10726	HMDB0062590	Organic acids and derivatives	Hydroxy acids and derivatives	NoSig
NEG2558	Glucose	0.913	179.055	[M-H2O-H]-	179.056	True	6.72375e+07	6.00239e+07	6.32139e+07	5.32963e+07	4.15312e+07	5.05571e+07	0.0218364	1.31015	0.389729	4.84615e+07	6.15611e+06	3.55423e+06	12.7031	6.34918e+07	3.61485e+06	2.08703e+06	5.69341	0.0565342	1.19926	1.1989	1.66082	C6H12O6	Organooxygen compounds	WQZGKKKJIJFFOK-VFUOTHLCSA-N	[H][C@@](O)(CO)[C@@]([H])(O)[C@]([H])(O)[C@]([H])(O)C=O	C00031	107526	HMDB0000122	Organic oxygen compounds	Organooxygen compounds	UP
POS3619	Cytidine	2.532	244.093	[M+H]+	244.093	True	2.70186e+09	2.41136e+09	2.63077e+09	2.02917e+09	1.80709e+09	2.04659e+09	0.00599639	1.31637	0.396565	1.96095e+09	1.33531e+08	7.70939e+07	6.80949	2.58133e+09	1.5143e+08	8.74281e+07	5.86635	0.0204111	1.28025	1.27999	2.22211	C9H13N3O5	Pyrimidine nucleosides	UHDGCWIWMRVCDJ-XVFCMESISA-N	NC1=NC(=O)N(C=C1)[C@@H]1O[C@H](CO)[C@@H](O)[C@H]1O	C00475	6175	HMDB0000089	Nucleosides, nucleotides, and analogues	Pyrimidine nucleosides	UP
POS5313	Tetradecyldiethanolamine	10.835	302.305	[M+H]+	302.305	True	2.11122e+09	2.0626e+09	2.19667e+09	1.31332e+09	1.2221e+09	1.27504e+09	5.5384e-05	1.67184	0.741441	1.27015e+09	4.58065e+07	2.64464e+07	3.60638	2.1235e+09	6.78737e+07	3.91869e+07	3.19632	0.000890516	1.35911	1.35907	4.25662	C18H39NO2	Alkanolamines	CPHJEACXPATRSU-UHFFFAOYSA-N	CCCCCCCCCCCCCCN(CCO)CCO	---	12942137	---	Organic nitrogen compounds	Organonitrogen compounds	UP
POS4701	Tyr-Val	6.953	281.15	[M+H]+	281.15	True	4.59699e+07	4.90527e+07	4.53872e+07	9.11932e+06	1.11385e+07	6.43741e+06	2.83713e-05	5.25974	2.39499	8.8984e+06	2.3583e+06	1.36157e+06	26.5025	4.68033e+07	1.9697e+06	1.13721e+06	4.20847	0.000619102	1.36136	1.36143	4.54712	C14H20N2O4	Peptides	OYOQKMOWUDVWCR-RYUDHWBXSA-N	CC(C)[C@@H](C(=O)O)NC(=O)[C@H](CC1=CC=C(C=C1)O)N	---	7009560	HMDB0029118	Organic acids and derivatives	Carboxylic acids and derivatives	UP
NEG6107	Uridine	4.592	279.039	[M+Cl]-	279.039	True	1.09653e+09	1.4074e+09	1.76215e+09	1.15953e+09	7.2388e+08	9.78583e+08	0.111689	1.4906	0.575892	9.53997e+08	2.18862e+08	1.2636e+08	22.9416	1.42203e+09	3.33052e+08	1.92288e+08	23.421	0.206847	0.975196	0.975027	0.951991	C9H12N2O6	Pyrimidine nucleosides	DRTQHJPVMGBUCF-UHFFFAOYSA-N	O=c1nc(O)ccn1C1OC(CO)C(O)C1O	C00299	6029	HMDB0000296	Nucleosides, nucleotides, and analogues	Pyrimidine nucleosides	NoSig
POS3495	Gly-Tyr	6.762	239.102	[M+H]+	239.103	True	6.43447e+07	8.28787e+07	9.91132e+07	3.32902e+07	2.76953e+07	5.45612e+07	0.0281747	2.13192	1.09215	3.85156e+07	1.41747e+07	8.18379e+06	36.8026	8.21122e+07	1.73969e+07	1.00441e+07	21.1868	0.0691356	1.17564	1.17544	1.55014	C11H14N2O4	Dipeptides	XBGGUPMXALFZOT-UHFFFAOYSA-N	O=C(O)C(N=C(O)CN)CC1=CC=C(O)C=C1	---	---	HMDB0028853	Organic acids and derivatives	Carboxylic acids and derivatives	UP
POS2357	5-Hydroxyindoleacetate	7.794	192.065	[M+H]+	192.065	True	1.85505e+07	1.88967e+07	1.92091e+07	1.9036e+07	1.95937e+07	1.81295e+07	0.945054	0.998189	-0.00261489	1.89197e+07	738975	426648	3.90585	1.88855e+07	329466	190217	1.74455	0.980075	0.0509102	0.0501107	0.0245435	C10H9NO3	Indole-3-acetic acid derivatives	DUUGKQCEGZLZNO-UHFFFAOYSA-N	O=C(O)CC1=CNC=2C=CC(O)=CC21	C05635	1826	HMDB0000763	Organoheterocyclic compounds	Indoles and derivatives	NoSig
POS2740	Benzoylcholine	6.862	208.133	[M]+	208.134	True	8.2059e+07	7.60555e+07	8.76427e+07	7.86307e+07	9.76202e+07	8.59285e+07	0.444748	0.937362	-0.0933213	8.73931e+07	9.57907e+06	5.53048e+06	10.9609	8.1919e+07	5.79486e+06	3.34567e+06	7.07389	0.59397	0.533587	0.533184	0.351886	C12H18NO2+	Benzoic acid esters	HOPVGFKDVOOCHD-UHFFFAOYSA-N	C[N+](C)(C)CCOC(=O)C1=CC=CC=C1	---	16632	---	Benzenoids	Benzene and substituted derivatives	NoSig
POS697	3-Amino-2,2-dimethylpropanoic acid	5.4	118.087	[M+CH3OH+H]+	118.086	True	1.79467e+08	2.4094e+08	3.17593e+08	2.74837e+08	2.12195e+08	9.76739e+07	0.478727	1.26217	0.335911	1.94902e+08	8.98388e+07	5.18684e+07	46.0943	2.46e+08	6.92019e+07	3.99537e+07	28.1308	0.623008	0.496699	0.497084	0.319912	C5H11NO2	Carboxylic acids and derivatives	DGNHGRLDBKAPEH-UHFFFAOYSA-N	CC(C)(CN)C(O)=O	---	95739;36689718	HMDB0245805	Organic acids and derivatives	Carboxylic acids and derivatives	NoSig
POS12402	Platelet-activating factor	11.244	524.371	[M+H]+	524.371	True	2.81591e+06	1.31507e+08	1.2081e+07	5.7742e+06	6.31338e+07	5.67056e+07	0.885662	1.16551	0.220961	4.18712e+07	3.14257e+07	1.81436e+07	75.0533	4.88013e+07	7.17748e+07	4.14392e+07	147.076	0.937851	0.104121	0.104432	0.0527318	C26H54NO7P	1-alkyl,2-acylglycero-3-phosphocholines	HVAUUPRFYPCOCA-AREMUKBSSA-N	CCCCCCCCCCCCCCCCOC[C@H](COP(=O)([O-])OCC[N+](C)(C)C)OC(=O)C	C04598	108156	HMDB0062195	Lipids and lipid-like molecules	Glycerophospholipids	NoSig
NEG826	2-Hydroxyisovaleric acid	7.239	117.054	[M-H]-	117.056	True	5.19492e+08	5.06295e+08	5.05382e+08	3.37714e+08	3.37967e+08	3.63221e+08	6.90215e-05	1.47383	0.559575	3.46301e+08	1.46543e+07	8.46064e+06	4.23166	5.1039e+08	7.89617e+06	4.55886e+06	1.54709	0.00102925	1.35818	1.3581	4.16102	C5H10O3	Fatty Acyls	NGEWQZIDQIYUNV-UHFFFAOYSA-N	CC(C)C(C(=O)O)O	---	99823	HMDB0000407	Lipids and lipid-like molecules	Fatty Acyls	UP
NEG4332	Mandelic acid sulfate	7.265	230.997	[M-H]-	230.997	True	1.7074e+07	1.56635e+07	1.59531e+07	1.63625e+07	1.61591e+07	1.56725e+07	0.745716	1.0103	0.0147893	1.60647e+07	354564	204707	2.2071	1.62302e+07	744918	430079	4.5897	0.84065	0.234095	0.234089	0.127427	C8H8O6S	Benzene and substituted derivatives	HTJHXKPVAJSPPA-UHFFFAOYSA-N	O=C(O)C(OS(=O)(=O)O)C=1C=CC=CC1	---	129632755	---	Benzenoids	Benzene and substituted derivatives	NoSig
NEG2019	2-Hydroxy-2-ethylsuccinic acid	4.93	161.044	[M-H]-	161.045	True	1.22943e+08	4.05127e+07	4.65478e+07	9.09479e+07	8.88635e+07	1.06315e+08	0.402009	0.733955	-0.446237	9.53755e+07	9.53114e+06	5.5028e+06	9.99328	7.00013e+07	4.59484e+07	2.65283e+07	65.6393	0.55213	0.57955	0.579885	0.395764	C6H10O5	Fatty Acyls	YVYGHRNLPUMVBU-UHFFFAOYSA-N	CCC(O)(CC(O)=O)C(O)=O	C02488	439736	HMDB0059758	Lipids and lipid-like molecules	Fatty Acyls	NoSig
POS11521	Taurocholic acid	10.332	498.289	[M-H2O+H]+	498.287	True	8.38084e+06	9.18934e+06	8.22585e+06	4.72573e+06	3.39727e+06	2.93966e+06	0.00131897	2.33181	1.22145	3.68755e+06	927741	535632	25.1587	8.59868e+06	517367	298702	6.01682	0.00655198	1.32658	1.32663	2.87976	C26H45NO7S	Taurinated bile acids and derivatives	WBWWGRHZICKQGZ-HZAMXZRMSA-N	O=S(=O)(O)CCN=C(O)CCC(C)C1CCC2C3C(O)CC4CC(O)CCC4(C)C3CC(O)C12C	C05122	139292118	HMDB0000036	Lipids and lipid-like molecules	Steroids and steroid derivatives	UP
NEG366	Phosphoric acid	0.898	96.968	[M-H]-	96.9696	True	1.88565e+09	1.78664e+09	1.71952e+09	2.94104e+09	3.05278e+09	3.01548e+09	3.24343e-05	0.598471	-0.740646	3.0031e+09	5.68893e+07	3.2845e+07	1.89435	1.79727e+09	8.35747e+07	4.82519e+07	4.65009	0.000649749	1.36103	1.36102	4.489	H3O4P	Non-metal phosphates	NBIIXXVUZAFLBC-UHFFFAOYSA-N	OP(=O)(O)O	C00009	1004;22486802	HMDB0001429	Homogeneous non-metal compounds	Non-metal oxoanionic compounds	DOWN
POS20227	SM(d18:0/16:1)	12.492	703.576	[M+H]+	703.575	True	1.67497e+07	1.86003e+08	9.30667e+07	4.96008e+08	1.79449e+08	1.14367e+08	0.26651	0.374539	-1.41681	2.63274e+08	2.04163e+08	1.17873e+08	77.5475	9.86064e+07	8.47624e+07	4.89376e+07	85.9604	0.404566	0.741351	0.74125	0.574286	C39H79N2O6P	Phosphosphingolipids	CGVOQSQIYSUXAT-PPLFXBRHSA-N	CCCCCCCCCCCCCCC[C@@H](O)[C@H](COP([O-])(=O)OCC[N+](C)(C)C)NC(=O)CCCCCCC\C=C/CCCCCC	C00550	53481781	HMDB0013464	Lipids and lipid-like molecules	Sphingolipids	NoSig
POS3095	Glycyl-L-phenylalanine	7.117	223.108	[M+H]+	223.108	True	1.27936e+08	1.38448e+08	1.40356e+08	1.93058e+07	1.88522e+07	1.83168e+07	7.20397e-06	7.20216	2.84843	1.88249e+07	495037	285810	2.62969	1.3558e+08	6.68806e+06	3.86135e+06	4.93292	0.000336388	1.36437	1.36438	5.14243	C11H14N2O3	Peptides	JBCLFWXMTIKCCB-VIFPVBQESA-N	C1=CC=C(C=C1)C[C@@H](C(=O)O)NC(=O)CN	---	92953;1549344	HMDB0028848	Organic acids and derivatives	Carboxylic acids and derivatives	UP
POS3821	Hexadeca-7,10,13-trienoic acid	12.071	251.201	[M+H-H2O]+	251.201	True	7.16994e+07	6.81788e+07	6.85063e+07	7.07975e+07	7.7441e+07	7.17155e+07	0.177922	0.9474	-0.0779543	7.3318e+07	3.60002e+06	2.07847e+06	4.91014	6.94615e+07	1.94498e+06	1.12293e+06	2.80008	0.300721	0.865058	0.864634	0.749769	C16H26O2	Fatty Acyls	KBGYPXOSNDMZRV-UHFFFAOYSA-N	CCC=CCC=CCC=CCCCCCC(O)=O	---	2826712	HMDB0302990	Lipids and lipid-like molecules	Fatty Acyls	NoSig
POS2161	Triethyl Phosphate	9.517	183.078	[M+H]+	183.078	True	5.47533e+07	5.46184e+07	5.62993e+07	5.63242e+07	5.90191e+07	5.22707e+07	0.766104	0.988408	-0.016821	5.58713e+07	3.3969e+06	1.9612e+06	6.07986	5.52237e+07	933985	539237	1.69128	0.85574	0.215765	0.214988	0.115712	C6H15O4P	Alkyl phosphates	DQWPFSLDHJDLRL-UHFFFAOYSA-N	CCOP(=O)(OCC)OCC	---	6535	HMDB0259191	Organic acids and derivatives	Organic phosphoric acids and derivatives	NoSig
NEG6434	(S)-10,16-Dihydroxyhexadecanoic acid	11.503	287.222	[M-H]-	287.222	True	4.78948e+06	8.47108e+06	1.02287e+07	3.7677e+07	4.25247e+07	4.90389e+07	0.000650582	0.181748	-2.45999	4.30802e+07	5.70127e+06	3.29163e+06	13.2341	7.82976e+06	2.77576e+06	1.60259e+06	35.4514	0.00393417	1.33875	1.33881	3.1867	C16H32O4	Fatty Acyls	VJZBXAQGWLMYMS-UHFFFAOYSA-N	OCCCCCCC(O)CCCCCCCCC(O)=O	C08285	441449	HMDB0037798	Lipids and lipid-like molecules	Fatty Acyls	DOWN
NEG7710	10-(Phosphonooxy)decyl methacrylate	11.015	321.147	[M-H]-	321.147	True	3.04609e+07	2.70768e+07	2.89759e+07	2.54443e+07	2.70769e+07	2.83012e+07	0.213074	1.07042	0.098172	2.69408e+07	1.43331e+06	827523	5.32023	2.88379e+07	1.69627e+06	979341	5.88209	0.342601	0.813534	0.813237	0.671469	C14H27O6P	Organic phosphoric acids and derivatives	CFKBCVIYTWDYRP-UHFFFAOYSA-N	CC(=C)C(=O)OCCCCCCCCCCOP(O)(O)=O	---	135071	HMDB0247525	Organic acids and derivatives	Organic phosphoric acids and derivatives	NoSig
NEG329	3-Hydroxypyridazine	2.328	95.0236	[M-H]-	95.0251	True	2.86269e+07	2.76115e+07	1.81097e+07	1.35222e+07	13557162	4.76279e+07	0.992418	0.995191	-0.00695439	2.49024e+07	1.96809e+07	1.13628e+07	79.0319	2.47827e+07	5.80128e+06	3.34937e+06	23.4086	0.997043	0.00626481	0.00691128	0.00330515	C4H4N2O	Diazines	AAILEWXSEQLMNI-UHFFFAOYSA-N	O=C1NN=CC=C1	---	68153	HMDB0246116	Organoheterocyclic compounds	Diazines	NoSig
NEG1932	Calystegine A7	8.189	158.081	[M-H]-	158.082	True	2.119e+07	8.27486e+06	3.34394e+07	4.24587e+07	5.9671e+07	6.07007e+07	0.0236922	0.386317	-1.37214	5.42768e+07	1.02477e+07	5.91654e+06	18.8805	2.09681e+07	1.25837e+07	7.26523e+06	60.0138	0.0608234	1.19169	1.19173	1.62539	C7H13NO3	Tropane alkaloids	FSMRMYVITPBGGD-UHFFFAOYSA-N	OC1CC(O)C2(O)CCC1N2	---	101409755	HMDB0036384	Alkaloids and derivatives	Tropane alkaloids	DOWN
POS4506	Lauryldiethanolamine	10.237	274.274	[M+H]+	274.274	True	8.7611e+09	8.77462e+09	9.23125e+09	9.02203e+09	8.54141e+09	8.09448e+09	0.297872	1.04322	0.0610495	8.55264e+09	4.63873e+08	2.67817e+08	5.42374	8.92232e+09	2.67626e+08	1.54514e+08	2.99951	0.442822	0.70141	0.701629	0.52597	C16H35NO2	Alkanolamines	NKFNBVMJTSYZDV-UHFFFAOYSA-N	CCCCCCCCCCCCN(CCO)CCO	---	352309	---	Organic nitrogen compounds	Organonitrogen compounds	NoSig
NEG13748	LPC(18:3)	11.891	562.315	[M+HCOO]-	562.313	True	1.47617e+07	1.18679e+07	1.36928e+07	1.40344e+07	1.70581e+07	1.50222e+07	0.190771	0.874392	-0.193648	1.53716e+07	1.54187e+06	890201	10.0307	1.34408e+07	1.46327e+06	844821	10.8868	0.315883	0.845627	0.845402	0.719489	C26H48NO7P	Lysophosphatidylcholines	WKQNRCYKYCKESD-YVHLTTHBSA-N	O=C(OCC(O)COP(=O)([O-])OCC[N+](C)(C)C)CCCCCCCC=CCC=CCC=CCC	---	---	HMDB0010388	Lipids and lipid-like molecules	Glycerophospholipids	NoSig
NEG4126	Pentobarbital	10.346	225.124	[M-H2O-H]-	225.124	True	6.48883e+09	6.57571e+09	7.01389e+09	4.72341e+09	4.19329e+09	4.74623e+09	0.000919113	1.46956	0.555379	4.55431e+09	3.12859e+08	1.80629e+08	6.86951	6.69281e+09	2.81436e+08	1.62487e+08	4.20505	0.00512857	1.33352	1.33339	3.03663	C11H18N2O3	Diazines	WEXRUCMBJFQVBZ-UHFFFAOYSA-N	CCCC(C)C1(CC)C(=O)NC(=O)NC1=O	C07422	4737	HMDB0014457	Organoheterocyclic compounds	Diazines	UP
POS4245	Phenylalanylvaline	7.248	265.154	[M+H]+	265.155	True	2.26205e+07	2.51243e+07	2.28316e+07	1.51338e+06	1.6983e+06	1.90623e+06	1.12765e-05	13.7901	3.78556	1705972	196537	113471	11.5205	2.35255e+07	1.38867e+06	801748	5.90283	0.000382774	1.36362	1.36363	4.94783	C14H20N2O3	Peptides	IEHDJWSAXBGJIP-UHFFFAOYSA-N	CC(C)C(C(=O)O)NC(=O)C(CC1=CC=CC=C1)N	---	4096934	HMDB0029008	Organic acids and derivatives	Carboxylic acids and derivatives	UP
NEG1260	2-Aminopurine	7.996	134.046	[M-H]-	134.047	True	2.45003e+07	2.6889e+07	2.50463e+07	1.7831e+07	7.05302e+07	5.36456e+07	0.232642	0.538252	-0.893645	4.73356e+07	2.69103e+07	1.55367e+07	56.85	2.54785e+07	1.25161e+06	722615	4.9124	0.363956	0.786445	0.786127	0.633313	C5H5N5	Imidazopyrimidines	MWBWWFOAEOYUST-UHFFFAOYSA-N	N=C1NC=C2N=CN=C2N1	---	9955	HMDB0245025	Organoheterocyclic compounds	Imidazopyrimidines	NoSig
POS1498	Creatine	1.453	154.058	[M+Na]+	154.059	True	8.98896e+08	9.25944e+08	9.74926e+08	7.27464e+08	7.78032e+08	8.35843e+08	0.0164245	1.1958	0.257973	7.80446e+08	5.42302e+07	3.13098e+07	6.94861	9.33256e+08	3.85389e+07	2.22504e+07	4.12951	0.045512	1.2218	1.22169	1.78451	C4H9N3O2	Amino acids and derivatives	CVSVTCORWBXHQV-UHFFFAOYSA-N	CN(CC(=O)O)C(=N)N	C00300	586	HMDB0000064	Organic acids and derivatives	Carboxylic acids and derivatives	UP
NEG2823	xi-5-Hydroxydecanoic acid	11.362	187.133	[M-H]-	187.133	True	1.40886e+07	1.71823e+07	1.78424e+07	2.40056e+07	2.22859e+07	3.02805e+07	0.0272432	0.641401	-0.640701	2.5524e+07	4.20801e+06	2.4295e+06	16.4865	1.63711e+07	2.00405e+06	1.15704e+06	12.2414	0.067665	1.1784	1.17871	1.56474	C10H20O3	Fatty Acyls	LMHJFKYQYDSOQO-UHFFFAOYSA-N	CCCCCC(O)CCCC(O)=O	---	1825	HMDB0040329	Lipids and lipid-like molecules	Fatty Acyls	DOWN
POS1801	N-(2-Hydroxyethyl)nicotinamide	2.779	167.081	[M+H]+	167.082	True	1.16302e+06	3.59209e+06	1.29987e+06	1.19961e+08	1.43819e+08	1.16983e+08	0.000126513	0.0159022	-5.97463	1.26921e+08	1.471e+07	8.49282e+06	11.5899	2.01832e+06	1.36464e+06	787875	67.6125	0.00151366	1.35492	1.35481	3.89786	C8H10N2O2	Pyridines and derivatives	SJZLOWYUGKIWAK-UHFFFAOYSA-N	OCCNC(=O)C1=CN=CC=C1	---	72663	HMDB0254988	Organoheterocyclic compounds	Pyridines and derivatives	DOWN
NEG13	Peracetic acid	1.277	75.0072	[M-H]-	75.0082	True	9.26746e+07	6.69582e+07	6.69739e+07	8.643e+07	5.35948e+07	1.23036e+08	0.60713	0.861425	-0.215204	8.76868e+07	3.47374e+07	2.00557e+07	39.6154	7.55356e+07	1.48429e+07	8.56954e+06	19.6502	0.729695	0.366114	0.366944	0.216718	C2H4O3	Carboxylic acids and derivatives	KFSLWBXXFJQRDL-UHFFFAOYSA-N	CC(=O)OO	---	6585	HMDB0031608	Organic acids and derivatives	Carboxylic acids and derivatives	NoSig
NEG1883	Allantoin	0.972	157.036	[M-H]-	157.037	True	1.3245e+08	1.33889e+08	1.25464e+08	9.72658e+07	1.03619e+08	1.12085e+08	0.00636077	1.25189	0.324106	1.04323e+08	7.43442e+06	4.29227e+06	7.12633	1.30601e+08	4.50686e+06	2.60204e+06	3.45086	0.0214128	1.27745	1.27735	2.19649	C4H6N4O3	Imidazoles	POJWUDADGALRAB-BANUENCFNA-N	N=C(O)NC1N=C(O)N=C1O	C01551	204	HMDB0000462	Organoheterocyclic compounds	Azoles	UP
NEG2989	Phenylacetylglycine	8.317	192.066	[M-H]-	192.067	True	4.66268e+07	4.83237e+07	4.82299e+07	3.9037e+07	4.20927e+07	4.30948e+07	0.00917515	1.15259	0.204884	4.14082e+07	2.11372e+06	1.22036e+06	5.1046	4.77268e+07	953773	550661	1.9984	0.0283132	1.25899	1.259	2.03739	C10H11NO3	Amino acids and derivatives	UTYVDVLMYQPLQB-UHFFFAOYSA-N	O=C(O)CN=C(O)CC=1C=CC=CC1	C05598	68144	HMDB0000821	Organic acids and derivatives	Carboxylic acids and derivatives	UP
POS4181	Phe-Pro	7.273	263.139	[M+H]+	263.139	True	7.03497e+07	7.23571e+07	7.6335e+07	2.50667e+07	2.81529e+07	2.83548e+07	2.39736e-05	2.68518	1.42502	2.71915e+07	1.84287e+06	1.06398e+06	6.77739	7.3014e+07	3.04623e+06	1.75874e+06	4.17212	0.000579616	1.3619	1.36191	4.62027	C14H18N2O3	Peptides	WEQJQNWXCSUVMA-RYUDHWBXSA-N	C1C[C@H](N(C1)C(=O)[C@H](CC2=CC=CC=C2)N)C(=O)O	---	7020642	HMDB0011177	Organic acids and derivatives	Carboxylic acids and derivatives	UP
POS8241	Tri(butoxyethyl)phosphate	12.699	399.25	[M+H]+	399.251	True	1.96673e+07	2.69508e+07	2.48867e+07	2.25714e+07	2.62129e+07	3.24721e+07	0.419204	0.87999	-0.18444	2.70855e+07	5.00771e+06	2.8912e+06	18.4885	2.3835e+07	3.75396e+06	2.16735e+06	15.7498	0.568011	0.560725	0.560908	0.377574	C18H39O7P	Alkyl phosphates	WTLBZVNBAKMVDP-UHFFFAOYSA-N	CCCCOCCOP(=O)(OCCOCCCC)OCCOCCCC	C14446	6540	HMDB0259275	Organic acids and derivatives	Organic phosphoric acids and derivatives	NoSig
POS20151	SM(d18:2/16:0)	12.473	701.558	[M+CH3OH+H]+	701.56	True	3.81876e+07	348838	9.40522e+06	154538	3.31257e+07	2.55669e+07	0.822184	0.81468	-0.295694	1.96157e+07	1.72724e+07	9.97224e+06	88.054	1.59805e+07	1.97577e+07	1.14071e+07	123.636	0.894088	0.162877	0.162865	0.0850309	C39H77N2O6P	Phosphosphingolipids	YLWSJLLZUHSIEA-CKSUKHGVSA-N	[H][C@@](COP([O-])(=O)OCC[N+](C)(C)C)(NC(=O)CCCCCCCCCCCCCCC)[C@H](O)\C=C\CCCCCCCC\C=C/CCC	C00550	52931235	HMDB0240638	Lipids and lipid-like molecules	Sphingolipids	NoSig
NEG521	2-Hydroxyisobutyric acid	4.117	103.039	[M-H]-	103.04	True	6.2024e+08	5.994e+08	5.7304e+08	3.43413e+08	3.58073e+08	3.90054e+08	0.00027188	1.64234	0.715753	3.63847e+08	2.38506e+07	1.37701e+07	6.55511	5.9756e+08	2.36535e+07	1.36564e+07	3.95836	0.00222485	1.349	1.34893	3.56562	C4H8O3	Alpha hydroxy acids and derivatives	BWLBGMIXKSTLSX-UHFFFAOYSA-N	CC(C)(C(=O)O)O	C21297	11671	HMDB0000729	Organic acids and derivatives	Hydroxy acids and derivatives	UP
NEG12973	Sulfolithocholylglycine	9.95	512.268	[M-H]-	512.268	True	710990	897912	1.19139e+06	475466	253724	487522	0.0294597	2.30153	1.20259	405571	131641	76003	32.4582	933432	242164	139813	25.9434	0.0711457	1.17116	1.171	1.53077	C26H43NO7S	Steroids and steroid derivatives	FHXBAFXQVZOILS-OETIFKLTSA-N	[H][C@@]1(CC[C@@]2([H])[C@]3([H])CC[C@]4([H])C[C@@H](CC[C@]4(C)[C@@]3([H])CC[C@]12C)OS(O)(=O)=O)[C@H](C)CCC(=O)NCC(O)=O	C11301	72222	HMDB0002639	Lipids and lipid-like molecules	Steroids and steroid derivatives	UP
POS2404	Phenylacetylglycine	8.357	194.081	[M+H]+	194.081	True	3.1981e+07	3.19403e+07	3.0111e+07	2.30647e+07	2.34254e+07	2.45476e+07	0.000547514	1.3237	0.404573	2.36792e+07	773354	446496	3.26596	3.13441e+07	1.06809e+06	616665	3.40764	0.0035396	1.34123	1.34117	3.2616	C10H11NO3	Amino acids and derivatives	UTYVDVLMYQPLQB-UHFFFAOYSA-N	O=C(O)CN=C(O)CC=1C=CC=CC1	C05598	68144	HMDB0000821	Organic acids and derivatives	Carboxylic acids and derivatives	UP
POS2624	Psicose	1.338	203.053	[M+Na]+	203.053	True	7.46997e+09	8.55702e+09	9.12258e+09	7.22028e+09	7.26217e+09	6.92151e+09	0.0657784	1.175	0.232655	7.13465e+09	1.85771e+08	1.07255e+08	2.60378	8.38319e+09	8.39905e+08	4.84919e+08	10.0189	0.135322	1.06987	1.07006	1.18192	C6H12O6	Monosaccharides	BJHIKXHVCXFQLS-PUFIMZNGSA-N	C1C(C(C(C(O1)(CO)O)O)O)O	C06468	90008	HMDB0250793	Organic oxygen compounds	Organooxygen compounds	NoSig
POS2474	Cyclo(Pro-Val)	7.269	197.128	[M+H]+	197.128	True	2.8795e+07	1.84443e+07	3.32312e+07	9.14853e+07	1.03979e+08	1.11776e+08	0.000505802	0.261914	-1.93284	1.02413e+08	1.02354e+07	5.90942e+06	9.99421	2.68235e+07	7.58804e+06	4.38096e+06	28.2888	0.00335104	1.34214	1.3422	3.29602	C10H16N2O2	Amino acids and derivatives	XLUAWXQORJEMBD-UHFFFAOYSA-N	CC(C)[C@H]1C(=O)N2CCC[C@H]2C(=O)N1	---	---	HMDB0240493	Organic acids and derivatives	Carboxylic acids and derivatives	DOWN
NEG3928	5-Hydroxytryptophan	7.091	219.077	[M-H]-	219.078	True	1.87299e+07	1.94658e+07	1.98355e+07	1.76168e+07	1.62882e+07	1.88787e+07	0.0985295	1.09941	0.136735	1.75946e+07	1.29539e+06	747894	7.36244	1.93437e+07	562846	324959	2.90971	0.187836	1.00059	1.0001	1.00643	C11H12N2O3	Serotonins	LDCYZAJDBXYCGN-VIFPVBQESA-N	O=C(O)C(N)CC1=CNC=2C=CC(O)=CC21	C01017	144	HMDB0000472	Organoheterocyclic compounds	Indoles and derivatives	NoSig
POS150	Morpholine	12.505	88.0763	[M+H]+	88.0757	True	1.474e+08	2.1038e+08	1.23962e+08	1.34736e+08	2.33507e+08	1.47145e+08	0.794979	0.934717	-0.0973986	1.71796e+08	5.38021e+07	3.10627e+07	31.3175	1.60581e+08	4.46913e+07	2.58025e+07	27.8311	0.876773	0.188785	0.188081	0.0996442	C4H9NO	Morpholines	YNAVUWVOSKDBBP-UHFFFAOYSA-N	C1COCCN1	C14452	8083	HMDB0031581	Organoheterocyclic compounds	Oxazinanes	NoSig
NEG5150	8-Hydroxy-4(6)-lactarene-5,14-diol	12.379	253.18	[M-H]-	253.18	True	4.20272e+07	4.40065e+07	56627151	4.04369e+07	4.18799e+07	4.64017e+07	0.397731	1.10832	0.14837	4.29062e+07	3.11201e+06	1.79672e+06	7.25306	4.75536e+07	7.91997e+06	4.5726e+06	16.6548	0.549805	0.584822	0.584649	0.40041	C15H26O3	Organooxygen compounds	UMXJEXAFNWMBJX-UHFFFAOYSA-N	CC1C=C(CO)C(CO)C(O)C2CC(C)(C)CC12	---	14109856	HMDB0035780	Organic oxygen compounds	Organooxygen compounds	NoSig
NEG2195	Phosphoenolpyruvate	0.988	166.974	[M-H]-	166.975	True	2.15743e+08	9.57243e+07	8.72886e+07	2.70956e+08	2.69852e+08	3.02758e+08	0.0258395	0.472704	-1.08099	2.81188e+08	1.86876e+07	1.07893e+07	6.64592	1.32919e+08	7.18521e+07	4.14839e+07	54.0572	0.0648376	1.18357	1.18376	1.58772	C3H5O6P	Phosphate esters	DTBNBXWJWCWCIK-UHFFFAOYSA-N	O=C(O)C(OP(=O)(O)O)=C	C00074	1005	HMDB0000263	Organic acids and derivatives	Organic phosphoric acids and derivatives	DOWN
NEG818	Erythronolactone	2.076	117.018	[M-H]-	117.019	True	2.9808e+07	1.07597e+07	2.9367e+07	6.47335e+07	5.1074e+07	75386617	0.0127808	0.365779	-1.45096	6.37314e+07	1.21872e+07	7.03631e+06	19.1228	2.33116e+07	1.08725e+07	6.27724e+06	46.6399	0.0368352	1.2388	1.23914	1.89344	C4H6O4	Gamma butyrolactones	SGMJBNSHAZVGMC-PWNYCUMCSA-N	O=C1OCC(O)C1O	---	5325915	HMDB0000349	Organoheterocyclic compounds	Lactones	DOWN
POS987	Cinnamic acid	6.914	131.049	[M+H-H2O]+	131.049	True	4.34439e+08	4.54651e+08	4.81394e+08	4.10963e+08	3.8525e+08	4.61216e+08	0.222639	1.08991	0.124209	4.19143e+08	3.86379e+07	2.23076e+07	9.21832	4.56828e+08	2.3553e+07	1.35984e+07	5.15578	0.354251	0.800391	0.799866	0.652399	C9H8O2	Cinnamic acids	WBYWAXJHAXSJNI-SREVYHEPSA-N	O=C(O)C=Cc1ccccc1	C10438	5372954	HMDB0000567	Phenylpropanoids and polyketides	Cinnamic acids and derivatives	NoSig
POS270	1,2-Dimethylimidazole	13.049	97.0764	[M+H]+	97.076	True	1.82257e+08	1.83376e+08	2.94021e+08	7.82537e+07	3.23106e+08	2.07109e+08	0.841235	1.08412	0.116528	2.02823e+08	1.22482e+08	7.07151e+07	60.3887	2.19885e+08	6.42066e+07	3.70697e+07	29.2001	0.907316	0.144842	0.145275	0.0750828	C5H8N2	Azoles	GIWQSPITLQVMSG-UHFFFAOYSA-N	CN1C=CN=C1C	---	15617	HMDB0244082	Organoheterocyclic compounds	Azoles	NoSig
POS4563	N-Fructosyl isoleucine	6.416	276.144	[M-H2O+H]+	276.144	True	2.31474e+07	1.60055e+07	1.04971e+07	5.34743e+07	2.23001e+07	7.7096e+07	0.102172	0.324784	-1.62245	5.09568e+07	2.74845e+07	1.58682e+07	53.937	1.655e+07	6.34271e+06	3.66196e+06	38.3246	0.193874	0.992428	0.993021	0.990667	C12H23NO7	N-Fructosyl amino acids	VYGRYVGDPYFVCA-UHFFFAOYSA-N	O=C(O)C(NCC1(O)(OC(CO)C(O)C1(O)))C(C)CC	---	139292115	---	Organic acids and derivatives	Carboxylic acids and derivatives	NoSig
NEG12445	Antcin K	8.225	487.305	[M-H]-	487.307	True	6.10554e+06	5.69793e+06	5.58926e+06	6.92535e+06	6.86086e+06	8.09096e+06	0.0253441	0.795018	-0.330941	7.29239e+06	692336	399720	9.49395	5.79758e+06	272184	157146	4.69479	0.0638566	1.18521	1.18557	1.59612	C29H44O6	Steroids and steroid derivatives	RWTLLOHEXIZDCG-UHFFFAOYSA-N	CC(CCC(=C)C(C)C(O)=O)C1CCC2C3=C(C(=O)CC12C)C1(C)CCC(O)C(C)(O)C1CC3O	---	76008041	HMDB0249891	Lipids and lipid-like molecules	Steroids and steroid derivatives	DOWN
NEG4261	D-Arabinose 5-phosphate	0.919	229.012	[M-H]-	229.012	True	2.53137e+08	2.32105e+08	2.32241e+08	1.97428e+08	1.94825e+08	2.23198e+08	0.0410019	1.16578	0.221301	2.0515e+08	1.56835e+07	9.05489e+06	7.64489	2.39161e+08	1.2104e+07	6.98826e+06	5.06104	0.0919346	1.135	1.13461	1.3872	C5H11O8P	Pentose phosphates	PPQRONHOSHZGFQ-WDCZJNDASA-N	OC(COP(O)(O)=O)C(O)C(O)C=O	C01112	230	HMDB0011734	Organic oxygen compounds	Organooxygen compounds	UP
NEG94	2-Cyanoacetamide	13.413	83.0236	[M-H]-	83.0251	True	1.22352e+09	1.89215e+09	1.27868e+09	3.41781e+09	1.64697e+09	1.07729e+09	0.473223	0.715449	-0.483078	2.04736e+09	1.22055e+09	7.04686e+08	59.616	1.46478e+09	3.71136e+08	2.14276e+08	25.3373	0.618447	0.503017	0.502875	0.324934	C3H4N2O	Carboxylic acids and derivatives	DGJMPUGMZIKDRO-UHFFFAOYSA-N	NC(=O)CC#N	---	7898	HMDB0245084	Organic acids and derivatives	Carboxylic acids and derivatives	NoSig
NEG99	2-Cyanoacetamide	12.532	83.0236	[M-H2O-H]-	83.0251	True	1.18576e+09	8.32617e+08	1.46751e+09	1.10427e+09	1.80734e+09	1.03504e+09	0.643739	0.883253	-0.179101	1.31555e+09	4.27303e+08	2.46704e+08	32.481	1.16196e+09	3.18114e+08	1.83663e+08	27.3773	0.758582	0.331779	0.331243	0.19129	C3H4N2O	Carboxylic acids and derivatives	DGJMPUGMZIKDRO-UHFFFAOYSA-N	NC(=O)CC#N	---	7898	HMDB0245084	Organic acids and derivatives	Carboxylic acids and derivatives	NoSig
POS749	Urocanic acid	2.727	121.04	[M-H2O+H]+	121.039	True	7.66201e+08	7.51917e+08	8.61247e+08	9.3084e+08	9.16356e+08	9.04471e+08	0.0242132	0.864699	-0.20973	9.17223e+08	1.32059e+07	7.62441e+06	1.43977	7.93121e+08	5.94289e+07	3.43113e+07	7.49303	0.0617714	1.18977	1.18977	1.61595	C6H6N2O2	Imidazoles	LOIYMIARKYCTBW-OWOJBTEDSA-N	OC(=O)\C=C\C1=CNC=N1	C00785	---	HMDB0000301	Organoheterocyclic compounds	Azoles	DOWN
NEG421	Succinic anhydride	3.274	99.0069	[M-H2O-H]-	99.0082	True	2.51e+07	4.98732e+07	4.84191e+07	1.07341e+07	1.31206e+07	9.17238e+06	0.0205632	3.7361	1.90153	1.1009e+07	1.98839e+06	1.148e+06	18.0615	4.11308e+07	1.39021e+07	8.02636e+06	33.7997	0.05439	1.20383	1.204	1.68691	C4H4O3	Carboxylic acids and derivatives	RINCXYDBBGOEEQ-UHFFFAOYSA-N	O=C1CCC(=O)O1	C19524	7922	HMDB0032523	Organic acids and derivatives	Carboxylic acids and derivatives	UP
NEG13747	LPC(18:3)	11.814	562.315	[M+FA-H]-	562.315	True	1.3167e+07	7.13889e+06	1.27881e+07	6.63607e+06	1.47853e+07	7.01603e+06	0.662034	1.16375	0.218781	9.47912e+06	4.59918e+06	2.65534e+06	48.5191	1.10313e+07	3.37627e+06	1.94929e+06	30.6062	0.77269	0.313115	0.313583	0.179119	C26H48NO7P	Lysophosphatidylcholines	WKQNRCYKYCKESD-YVHLTTHBSA-N	O=C(OCC(O)COP(=O)([O-])OCC[N+](C)(C)C)CCCCCCCC=CCC=CCC=CCC	---	---	HMDB0010388	Lipids and lipid-like molecules	Glycerophospholipids	NoSig
POS5307	Isoleucyl-Glycyl-Isoleucine	7.896	302.207	[M+H]+	302.207	True	4.39721e+06	4652661	1.25484e+06	661865	1.40052e+06	1.04357e+06	0.0973597	3.31772	1.73019	1.03532e+06	369398	213272	35.6796	3.4349e+06	1.89231e+06	1.09252e+06	55.0905	0.186708	1.0023	1.0024	1.01162	C14H27N3O4	Peptides	MQFGXJNSUJTXDT-QSFUFRPTSA-N	CC[C@H](C)[C@@H](C(=O)NCC(=O)N[C@@H]([C@@H](C)CC)C(=O)O)N	---	145456148	---	Organic acids and derivatives	Carboxylic acids and derivatives	NoSig
NEG2424	Citrulline	0.937	174.087	[M-H]-	174.088	True	1.14488e+08	1.1082e+08	1.12537e+08	8.31801e+07	8.45291e+07	9.34793e+07	0.00167981	1.29349	0.371272	8.70628e+07	5.59762e+06	3.23179e+06	6.42941	1.12615e+08	1.8353e+06	1.05961e+06	1.62971	0.00771703	1.32153	1.32136	2.77474	C6H13N3O3	Amino acids and derivatives	RHGKLRLOHDJJDR-BYPYZUCNSA-N	C(C[C@@H](C(=O)O)N)CNC(=O)N	C00327	9750;6992098	HMDB0000904	Organic acids and derivatives	Carboxylic acids and derivatives	UP
POS3128	4-Hydroxybenzoylcholine	13.446	224.128	[M]+	224.128	True	7.48846e+07	1.14127e+08	7.87382e+07	1.15045e+08	6.37124e+07	4.81469e+07	0.597271	1.18001	0.238801	7.56349e+07	3.50066e+07	2.02111e+07	46.2837	8.925e+07	2.16304e+07	1.24883e+07	24.2357	0.723915	0.376461	0.376649	0.223829	C12H18NO3	Benzoic acid esters	BAPAICNRGIBFJT-UHFFFAOYSA-O	C[N+](C)(C)CCOC(=O)C1=CC=C(C=C1)O	---	151252	HMDB0029559	Benzenoids	Benzene and substituted derivatives	NoSig
POS23605	PC(16:0/22:6)	11.782	806.57	[M+H]+	806.569	True	2.93033e+08	8.79858e+07	6.49964e+07	1.51183e+08	4.19163e+08	3.33788e+08	0.227572	0.493306	-1.01944	3.01378e+08	1.36898e+08	7.90383e+07	45.4241	1.48672e+08	1.25548e+08	7.24851e+07	84.4463	0.357446	0.793175	0.79306	0.642881	C46H80NO8P	Phosphatidylcholines	IESVDEZGAHUQJU-ZLBXKVHBSA-N	CCCCCCCCCCCCCCCC(=O)OC[C@H](COP(=O)([O-])OCC[N+](C)(C)C)OC(=O)CC/C=C\C/C=C\C/C=C\C/C=C\C/C=C\C/C=C\CC	---	6441886	HMDB0007991	Lipids and lipid-like molecules	Glycerophospholipids	NoSig
POS7633	S-Lactoylglutathione	6.741	380.111	[M+H]+	380.112	True	2.3481e+07	2.45155e+07	2.57292e+07	1.12825e+08	1.24562e+08	1.12588e+08	2.12124e-05	0.21066	-2.24701	1.16658e+08	6.84583e+06	3.95244e+06	5.86827	2.45752e+07	1.12525e+06	649666	4.57882	0.000551523	1.36231	1.36224	4.67341	C13H21N3O8S	Peptides	VDYDCVUWILIYQF-CSMHCCOUSA-N	CC(C(=O)SCC(C(=O)NCC(=O)O)NC(=O)CCC(C(=O)O)N)O	C03451	440018	HMDB0001066	Organic acids and derivatives	Carboxylic acids and derivatives	DOWN
POS3792	O-Desmethyltramadol	10.962	250.178	[M+H]+	250.18	True	1.01038e+08	1.04178e+08	1.21298e+08	4.65283e+07	5.15075e+07	5.98253e+07	0.00160615	2.06837	1.04849	5.26204e+07	6.71801e+06	3.87864e+06	12.7669	1.08838e+08	1.09043e+07	6.29561e+06	10.0188	0.00749127	1.32245	1.32239	2.79421	C15H23NO2	Cyclohexylphenols	RSMYYINTIXFRCJ-JDLVMGNASA-N	CN(C)C[C@@H]1CCCC([C@H]1C2=CC(=CC=C2)O)O	---	---	HMDB0060997	Benzenoids	Benzene and substituted derivatives	UP
POS1842	Pyridoxamine	1.253	169.095	[M+H]+	169.097	True	2.12525e+08	4.20762e+08	3.04929e+08	3.56501e+08	4.04135e+08	4.14339e+08	0.277386	0.798498	-0.32464	3.91659e+08	3.08719e+07	1.78239e+07	7.88235	3.12739e+08	1.04338e+08	6.02395e+07	33.3627	0.418486	0.727529	0.727318	0.556915	C8H12N2O2	Pyridoxamine 5'-phosphates	NHZMQXZHNVQTQA-UHFFFAOYSA-N	CC1=NC=C(C(=C1O)CN)CO	C00534	1052	HMDB0001431	Organoheterocyclic compounds	Pyridines and derivatives	NoSig
POS305	alpha-Methylene butyrolactone	1.634	99.0444	[M+H]+	99.0441	True	2.37682e+08	1.32933e+08	1.54143e+08	7.825e+07	2.56303e+08	5.35015e+07	0.558217	1.35228	0.435391	1.29352e+08	1.10638e+08	6.38767e+07	85.5325	1.74919e+08	5.53791e+07	3.19732e+07	31.6598	0.697486	0.414914	0.415514	0.253197	C5H6O2	Gamma butyrolactones	GSLDEZOOOSBFGP-UHFFFAOYSA-N	O=C1OCCC1=C	C20578	68352	HMDB0246945	Organoheterocyclic compounds	Lactones	NoSig
POS5226	Norethindrone	10.402	299.2	[M+H]+	299.201	True	1.07692e+08	1.16416e+08	1.18237e+08	9.88116e+07	9.79772e+07	9.55042e+07	0.00802461	1.17124	0.228036	9.7431e+07	1.71998e+06	993031	1.76533	1.14115e+08	5.63685e+06	3.25444e+06	4.93962	0.0254703	1.26598	1.26611	2.09558	C20H26O2	Estrogens and derivatives	VIKNJXKGJWUCNN-UHFFFAOYSA-N	C[C@]12CC[C@H]3[C@@H](CCC4=CC(=O)CC[C@H]34)[C@@H]1CC[C@@]2(O)C#C	C05028	6230	HMDB0014855	Lipids and lipid-like molecules	Steroids and steroid derivatives	UP
POS4881	Arachidonic acid	11.795	287.236	[M+H-H2O]+	287.236	True	3309.03	2.12895e+08	4.32715e+08	3309.03	3.15631e+08	3.00523e+08	0.954514	1.04781	0.0673703	2.05386e+08	1.78027e+08	1.02784e+08	86.6792	2.15204e+08	2.16365e+08	1.24918e+08	100.539	0.981832	0.0412981	0.0414772	0.0202177	C20H32O2	Long-chain fatty acids	YZXBAPSDXZZRGB-UHFFFAOYSA-N	CCCCC/C=C\C/C=C\C/C=C\C/C=C\CCCC(=O)O	C00219	444899	HMDB0001043	Lipids and lipid-like molecules	Fatty Acyls	NoSig
POS9266	7b,9-Dihydroxy-3-(hydroxymethyl)-1,1,6,8-tetramethyl-5-oxo-1,1a,1b,4,4a,5,7a,7b,8,9-decahydro-9ah-cyclopropa[3,4]benzo[1,2-e]azulen-9a-yl acetate	11.856	432.238	[M+ACN+H]+	432.238	True	3.90678e+07	4.86665e+07	4.25377e+07	2.62053e+07	3.78464e+07	3.96545e+07	0.155193	1.25616	0.329024	3.45688e+07	7.29916e+06	4.21417e+06	21.1149	4.3424e+07	4.86037e+06	2.80614e+06	11.1928	0.272479	0.900024	0.900144	0.809129	C22H30O6	Tigliane and ingenane diterpenoids	WZYGIALDVOKLLL-UHFFFAOYSA-N	CC1C(O)C2(OC(C)=O)C(C3\C=C(CO)/CC4C(\C=C(C)/C4=O)C13O)C2(C)C	---	45360040	---	Lipids and lipid-like molecules	Prenol lipids	NoSig
POS11039	dihydrocytochalasin B	10.103	482.289	[M+H]+	482.29	True	2.17514e+07	1.94964e+07	2.18038e+07	2.86033e+07	3.25708e+07	3.40503e+07	0.00394539	0.662137	-0.594799	3.17415e+07	2.81661e+06	1.62617e+06	8.87359	2.10172e+07	1.3173e+06	760543	6.26772	0.0147892	1.29658	1.29664	2.40391	C29H39NO5	Cytochalasans	WIULKAASLBZREV-UHFFFAOYSA-N	CC1C2C(CC3=CC=CC=C3)NC(=O)C22OC(=O)CCC(O)CCCC(C)CC=CC2C(O)C1=C	---	3064	HMDB0251302	Alkaloids and derivatives	Cytochalasans	DOWN
NEG790	Acetylglycine	1.703	116.034	[M-H]-	116.035	True	5.98819e+07	3.82242e+07	3.11529e+07	4.72071e+07	1.93783e+07	6.45992e+07	0.969449	0.985321	-0.0213338	4.37282e+07	2.28103e+07	1.31695e+07	52.1639	4.30863e+07	1.49689e+07	8.64231e+06	34.7417	0.988871	0.0270429	0.0278536	0.0134749	C4H7NO3	Amino acids and derivatives	OKJIRPAQVSHGFK-UHFFFAOYSA-N	O=C(NCC(=O)O)C	---	10972	HMDB0000532	Organic acids and derivatives	Carboxylic acids and derivatives	NoSig
NEG1763	2,6-Dihydroxybenzoate	8.501	153.018	[M-H]-	153.019	True	1.6428e+07	1.71842e+07	1.7185e+07	1.36825e+07	1.64415e+07	1.83766e+07	0.609906	1.04735	0.0667491	1.61669e+07	2.35907e+06	1.36201e+06	14.592	1.69324e+07	436822	252199	2.5798	0.731409	0.364408	0.364218	0.214737	C7H6O4	Hydroxybenzoic acid derivatives	AKEUNCKRJATALU-UHFFFAOYSA-N	C1=CC(=C(C(=C1)O)C(=O)O)O	C21298	9338	HMDB0013676	Benzenoids	Benzene and substituted derivatives	NoSig
NEG1514	Quinolinol	7.169	144.044	[M-H]-	144.046	True	2.37517e+07	3.27865e+07	3.05887e+07	3.17743e+07	2.64628e+07	4.23819e+07	0.452756	0.86591	-0.207711	3.35396e+07	8.10504e+06	4.67945e+06	24.1656	2.90423e+07	4.71171e+06	2.72031e+06	16.2236	0.600725	0.524066	0.5246	0.344136	C9H7NO	Hydroquinolones	LISFMEBWQUVKPJ-UHFFFAOYSA-N	OC=1N=C2C=CC=CC2=CC1	C06338	6038	---	Organoheterocyclic compounds	Quinolines and derivatives	NoSig
NEG1884	5,6-Dimethyl-2,3-pyrazinedicarbonitrile	11.864	157.051	[M-H]-	157.052	True	6.23714e+07	1.16592e+08	3.73228e+07	5.03255e+07	1.0371e+08	3.5677e+07	0.790703	1.14007	0.189123	6.32376e+07	3.58075e+07	2.06734e+07	56.6237	7.20953e+07	4.05192e+07	2.33938e+07	56.2023	0.874424	0.191355	0.192056	0.101987	C8H6N4	Diazines	VPRRXMCIOHZBCX-UHFFFAOYSA-N	CC1=NC(C#N)=C(N=C1C)C#N	---	299559	HMDB0246643	Organoheterocyclic compounds	Diazines	NoSig
POS3161	1,3-Dicyclohexylurea	11.273	225.196	[M+H]+	225.196	True	4.96616e+07	5.63436e+07	5.18463e+07	6.16562e+07	5.11368e+07	4.31367e+07	0.916106	1.01232	0.0176724	5.19766e+07	9.28824e+06	5.36257e+06	17.8701	5.26172e+07	3.40704e+06	1.96706e+06	6.47516	0.959282	0.0762221	0.0765568	0.0380543	C13H24N2O	Ureas	ADFXKUOMJKEIND-UHFFFAOYSA-N	C1CCC(CC1)NC(=O)NC2CCCCC2	---	4277	HMDB0244166	Organic acids and derivatives	Organic carbonic acids and derivatives	NoSig
POS2738	N-Acetylphenylalanine	8.704	208.097	[M+H]+	208.097	True	1.13544e+07	1.0654e+07	9.76349e+06	7.70309e+06	9.48547e+06	8.07958e+06	0.038126	1.25739	0.330432	8.42271e+06	939425	542377	11.1535	1.05906e+07	797355	460353	7.52887	0.0874108	1.1429	1.14317	1.41878	C11H13NO3	Amino acids and derivatives	CBQJSKKFNMDLON-UHFFFAOYSA-N	CC(O)=N[C@@H](Cc1ccccc1)C(=O)O	C03519	74839	HMDB0000512	Organic acids and derivatives	Carboxylic acids and derivatives	UP
NEG7866	1,5-Bis(4-hydroxy-3-methoxyphenyl)-1,4-pentadien-3-one	6.723	325.107	[M-H]-	325.108	True	5.86762e+07	4.96059e+07	5.11045e+07	7.82107e+07	9.17354e+07	8.48467e+07	0.0027105	0.625554	-0.676794	8.49309e+07	6.76278e+06	3.90449e+06	7.96268	5.31289e+07	4.86224e+06	2.80721e+06	9.15177	0.0111149	1.30892	1.30884	2.56695	C19H18O5	Cinnamic acids and derivatives	ISIMGBQRFXXNON-VHOZIDCHSA-N	COC1=C(O)C=CC(\C=C/C(=O)/C=C\C2=CC(OC)=C(O)C=C2)=C1	---	131752986	HMDB0040930	Phenylpropanoids and polyketides	Cinnamic acids and derivatives	DOWN
POS186	Alanine	1.448	90.0554	[M+H]+	90.055	True	3.05581e+09	3.13959e+09	3.21636e+09	3.09803e+09	2.18432e+09	2.53051e+09	0.119965	1.20465	0.268614	2.60429e+09	4.61301e+08	2.66332e+08	17.7131	3.13725e+09	8.03016e+07	4.63622e+07	2.55962	0.219456	0.960205	0.95992	0.920947	C3H7NO2	Amino acids and derivatives	QNAYBMKLOCPYGJ-REOHCLBHSA-N	C[C@H](N)C(O)=O	C00041	5950;7311724	HMDB0000161	Organic acids and derivatives	Carboxylic acids and derivatives	NoSig
POS4567	3-Hydroxyhexanoylcarnitine	6.888	276.181	[M+H-H2O]+	276.181	True	2.61268e+07	2.6763e+07	3.50834e+07	1.32894e+07	1.16737e+07	1.11437e+07	0.00426607	2.43647	1.2848	1.20356e+07	1.1177e+06	645305	9.28664	2.93244e+07	4.99761e+06	2.88537e+06	17.0425	0.0156417	1.29379	1.2938	2.36997	C13H25NO5	Fatty Acyls	VYEONLJQPYRKAN-WDEREUQCSA-N	CCC[C@H](O)CC(=O)O[C@H](CC([O-])=O)C[N+](C)(C)C	---	156908002	HMDB0013131	Lipids and lipid-like molecules	Fatty Acyls	UP
NEG2806	Isoplumbagin	1.744	187.041	[M-H2O-H]-	187.04	True	2.04652e+08	3.43484e+08	3.66205e+08	5.8457e+07	3.16931e+08	3.4256e+08	0.562616	1.27355	0.348852	2.39316e+08	1.57152e+08	9.07317e+07	65.6671	3.0478e+08	8.74548e+07	5.04921e+07	28.6944	0.700833	0.41097	0.4111	0.249788	C11H8O3	Naphthalenes	ZMOIGGHUSNHCAB-UHFFFAOYSA-N	CC1=CC(=O)C2=C(C(O)=CC=C2)C1=O	---	375105	HMDB0035291	Benzenoids	Naphthalenes	NoSig
POS5777	Phytosphingosine	10.891	318.3	[M+H]+	318.3	True	4.34397e+08	4.39555e+08	4.25348e+08	4.15028e+08	4.48561e+08	3.98404e+08	0.462595	1.02956	0.0420315	4.20664e+08	2.55493e+07	1.47509e+07	6.07357	4.331e+08	7.19208e+06	4.15235e+06	1.66061	0.608494	0.513325	0.514119	0.334799	C18H39NO3	Alkanolamines	AERBNCYCJBRYDG-KSZLIROESA-N	CCCCCCCCCCCCCC[C@H]([C@H]([C@H](CO)N)O)O	C12144	---	HMDB0004610	Organic nitrogen compounds	Organonitrogen compounds	NoSig
NEG424	Succinic anhydride	6.664	99.007	[M-H]-	99.0082	True	7.55385e+06	1.49698e+07	7.09476e+06	1.19067e+07	1.49466e+07	1.5098e+07	0.210002	0.70602	-0.50222	1.39838e+07	1.80037e+06	1.03945e+06	12.8747	9.87281e+06	4.42011e+06	2.55195e+06	44.7706	0.339447	0.817786	0.817584	0.677777	C4H4O3	Carboxylic acids and derivatives	RINCXYDBBGOEEQ-UHFFFAOYSA-N	O=C1CCC(=O)O1	C19524	7922	HMDB0032523	Organic acids and derivatives	Carboxylic acids and derivatives	NoSig
POS1038	Ornithine	1.126	133.097	[M+H]+	133.097	True	1.83332e+08	1.85486e+08	2.01009e+08	2.68379e+08	3.12822e+08	2.82518e+08	0.00234119	0.659735	-0.600041	2.87907e+08	2.27064e+07	1.31096e+07	7.88674	1.89942e+08	9.64413e+06	5.56804e+06	5.0774	0.0100384	1.31317	1.313	2.63056	C5H12N2O2	Amino acids and derivatives	AHLPHDHHMVZTML-BYPYZUCNSA-N	O=C(O)C(N)CCCN	C00077	---	HMDB0000214	Organic acids and derivatives	Carboxylic acids and derivatives	DOWN
POS254	1H-Pyrrole-2-carboxaldehyde	2.829	96.0449	[M+H]+	96.0449	True	263965187	3.81548e+08	2.69136e+08	2.4689e+08	1.49375e+08	2.17304e+08	0.10478	1.4907	0.57599	2.04523e+08	4.9998e+07	2.88664e+07	24.4461	3.04883e+08	6.64443e+07	3.83617e+07	21.7934	0.1979	0.988156	0.988019	0.979721	C5H5NO	Organooxygen compounds	ZSKGQVFRTSEPJT-UHFFFAOYSA-N	O=CC1=CC=CN1	---	13854	HMDB0036057	Organic oxygen compounds	Organooxygen compounds	NoSig
POS5081	N-Fructosyl isoleucine	6.407	294.154	[M+H]+	294.155	True	9.83888e+07	1.98237e+08	2.51618e+08	1.09453e+08	1.58645e+08	2.55877e+08	0.902781	1.04632	0.0653188	1.74658e+08	7.4514e+07	4.30207e+07	42.6627	1.82748e+08	7.77799e+07	4.49062e+07	42.5613	0.949397	0.0889615	0.0887479	0.0444174	C12H23NO7	N-Fructosyl amino acids	VYGRYVGDPYFVCA-UHFFFAOYSA-N	O=C(O)C(NCC1(O)(OC(CO)C(O)C1(O)))C(C)CC	---	139292115	---	Organic acids and derivatives	Carboxylic acids and derivatives	NoSig
POS3516	Carbazolepropanoic acid	6.946	240.102	[M+CH3OH+H]+	240.102	True	2.26114e+07	2.76092e+07	3.0245e+07	1.69155e+07	8.25185e+06	1.55539e+07	0.0193394	1.97601	0.98259	1.35738e+07	4.65891e+06	2.68982e+06	34.3229	2.68219e+07	3.87726e+06	2.23854e+06	14.4556	0.0515437	1.20925	1.20903	1.71356	C15H13NO2	Indoles and derivatives	NHIYJOFCMZBBHA-UHFFFAOYSA-N	OC(=O)CCC1=CC=CC2=C1NC1=CC=CC=C21	---	19962862	HMDB0249628	Organoheterocyclic compounds	Indoles and derivatives	UP
NEG683	Uracil	1.931	111.018	[M-H]-	111.02	True	6.17286e+08	5.59111e+08	4.72528e+08	4.54292e+08	5.47744e+08	4.50015e+08	0.281613	1.13558	0.183434	4.84017e+08	5.5231e+07	3.18876e+07	11.411	5.49642e+08	7.28422e+07	4.20555e+07	13.2527	0.422377	0.7216	0.72196	0.550347	C4H4N2O2	Pyrimidones	ISAKRJDGNUQOIC-UHFFFAOYSA-N	O=C1C=CNC(=O)N1	C00106	1174	HMDB0000300	Organoheterocyclic compounds	Diazines	NoSig
NEG4592	HEPES	6.689	237.091	[M-H]-	237.091	True	4.10483e+07	4.54271e+07	5.21633e+07	6.1748e+07	7.01649e+07	5.14908e+07	0.0767298	0.755921	-0.403693	6.11345e+07	9.35217e+06	5.39948e+06	15.2977	4.62129e+07	5.59899e+06	3.23258e+06	12.1157	0.151286	1.0457	1.04521	1.11504	C8H18N2O4S	N-alkylpiperazines	JKMHFZQWWAIEOD-UHFFFAOYSA-N	O=S(=O)(O)CCN1CCN(CCO)CC1	---	23831	HMDB0062295	Organoheterocyclic compounds	Diazinanes	NoSig
POS7497	Prostaglandin E2	10.398	375.213	[M+Na]+	375.214	True	4.34804e+07	4.70273e+07	4.35925e+07	3.05636e+07	3.15896e+07	4.07976e+07	0.0397626	1.30257	0.381356	3.43169e+07	5.6358e+06	3.25383e+06	16.4228	4.47001e+07	2.0162e+06	1.16405e+06	4.51051	0.0900327	1.13854	1.13826	1.40052	C20H32O5	Prostaglandins and related compounds	XEYBRNLFEZDVAW-ARSRFYASSA-N	CCCCCC(O)C=CC1C(O)CC(=O)C1CC=CCCCC(=O)O	C00584	5280360	HMDB0001220	Lipids and lipid-like molecules	Fatty Acyls	UP
POS2893	Citric acid	2.508	215.016	[M+Na]+	215.016	True	2.5776e+08	2.74328e+08	3.61365e+08	8.31861e+07	9.4696e+07	1.03878e+08	0.0033644	3.17097	1.66492	9.39201e+07	1.03679e+07	5.98589e+06	11.039	2.97817e+08	5.56536e+07	3.21316e+07	18.6871	0.0130104	1.30211	1.3021	2.47309	C6H8O7	Tricarboxylic acids and derivatives	KRKNYBCHXYNGOX-UHFFFAOYSA-N	O=C(O)CC(O)(C(=O)O)CC(=O)O	C00158	311	HMDB0000094	Organic acids and derivatives	Carboxylic acids and derivatives	UP
POS1654	Indole-3-acetaldehyde	7.183	160.076	[M+H]+	160.076	True	8.05599e+07	5.69875e+07	4.92824e+07	3.47695e+07	4.15807e+07	4.49599e+07	0.091439	1.5401	0.623025	4.04367e+07	5.1906e+06	2.99679e+06	12.8364	6.22766e+07	1.62957e+07	9.40835e+06	26.1667	0.176801	1.01438	1.01423	1.03887	C10H9NO	3-alkylindoles	WHOOUMGHGSPMGR-UHFFFAOYSA-N	O=CCc1c[nH]c2ccccc12	C00637	800	HMDB0001190	Organoheterocyclic compounds	Indoles and derivatives	NoSig
POS2947	1,2,3,4-Tetrahydro-beta-carboline-3-carboxylic acid	7.577	217.097	[M+H]+	217.097	True	2.25719e+07	2.23626e+07	2.37231e+07	3.1834e+07	3.4746e+07	3.70843e+07	0.00177694	0.662306	-0.594429	3.45548e+07	2.6304e+06	1.51866e+06	7.61225	2.28859e+07	732553	422940	3.2009	0.0080722	1.31997	1.32005	2.75033	C12H12N2O2	Beta carbolines	FSNCEEGOMTYXKY-UHFFFAOYSA-N	C1C(NCC2=C1C3=CC=CC=C3N2)C(=O)O	---	98285;3288669	HMDB0035665	Organoheterocyclic compounds	Indoles and derivatives	DOWN
NEG1119	gamma-delta-Dioxovaleric acid	6.873	129.018	[M-H]-	129.019	True	8.58704e+07	7.23869e+07	8.02335e+07	8.0524e+07	8.36084e+07	8.41534e+07	0.467358	0.960549	-0.0580683	8.27619e+07	1.95714e+06	1.12995e+06	2.36478	7.94969e+07	6.77188e+06	3.90975e+06	8.51842	0.612781	0.50883	0.50907	0.33035	C5H6O4	Keto acids and derivatives	YHUFRVYVNKGICT-UHFFFAOYSA-N	OC(=O)CCC(=O)C=O	C02800	119412	HMDB0013233	Organic acids and derivatives	Keto acids and derivatives	NoSig
NEG10931	Riboflavin	7.536	421.136	[M+FA-H]-	421.137	True	3.65003e+06	3.14234e+06	3.42916e+06	4.60724e+06	4.61698e+06	4.14905e+06	0.00787931	0.764325	-0.387741	4.45776e+06	267394	154380	5.9984	3.40718e+06	254555	146967	7.47113	0.0251615	1.26716	1.26704	2.10351	C17H20N4O6	Flavins	AUNGANRZJHBGPY-UHFFFAOYSA-N	Cc1cc2nc3c(O)nc(=O)nc-3n(CC(O)C(O)C(O)CO)c2cc1C	C00255	493570	HMDB0000244	Organoheterocyclic compounds	Pteridines and derivatives	DOWN
POS2631	Alanylleucine	6.986	203.139	[M+H]+	203.139	True	5.99834e+07	6.70974e+07	7.05688e+07	9.41808e+06	1.23583e+07	1.32245e+07	8.24562e-05	5.647	2.49748	1.16669e+07	1.99514e+06	1.1519e+06	17.1008	6.58832e+07	5.39612e+06	3.11545e+06	8.19044	0.00115818	1.35722	1.35723	4.08378	C9H18N2O3	Peptides	RDIKFPRVLJLMER-BQBZGAKWSA-N	O=C(O)C(N=C(O)C(N)C)CC(C)C	---	259583	HMDB0028691	Organic acids and derivatives	Carboxylic acids and derivatives	UP
POS5755	15-Deoxy-PGJ2	11.689	317.211	[M+H]+	317.211	True	4.21086e+07	4.40131e+07	3.37826e+07	1.37943e+07	2.35502e+07	2.44559e+07	0.013969	1.94018	0.956193	2.06002e+07	5.9114e+06	3.41295e+06	28.6959	3.99681e+07	5.44075e+06	3.14122e+06	13.6127	0.0398773	1.23318	1.23321	1.85483	C20H28O3	Prostaglandins and related compounds	VHRUMKCAEVRUBK-GODQJPCRSA-N	CCCCCC=CC=C1C(C=CC1=O)CC=CCCCC(=O)O	C14717	---	HMDB0005079	Lipids and lipid-like molecules	Fatty Acyls	UP
POS862	Maltol	6.919	127.039	[M+H]+	127.039	True	1.20963e+08	9.25712e+07	1.87395e+08	8.16755e+07	1.14486e+08	5.60549e+07	0.205172	1.58962	0.668683	8.40722e+07	2.92892e+07	1.69101e+07	34.8381	1.33643e+08	4.86667e+07	2.80978e+07	36.4155	0.332962	0.824188	0.824468	0.687881	C6H6O3	Pyranones and derivatives	XPCTZQVDEJYUGT-UHFFFAOYSA-N	O=C1C=COC(=C1O)C	C11918	8369	HMDB0030776	Organoheterocyclic compounds	Pyrans	NoSig
POS8649	Bicyclogermacrene	7.051	413.141	[M+H]+	413.142	True	2.29513e+07	2.72553e+07	2.4569e+07	1.66697e+07	1.52584e+07	1.67138e+07	0.00291315	1.53727	0.62037	1.62139e+07	827822	477943	5.10562	2.49252e+07	2.174e+06	1.25516e+06	8.72211	0.0115957	1.30668	1.30667	2.53564	C15H20N6O8	Purine nucleosides	UNUYMBPXEFMLNW-DWVDDHQFSA-N	C[C@H]([C@@H](C(=O)O)NC(=O)Nc1c2c(ncn1)n(cn2)[C@H]3[C@@H]([C@@H]([C@H](O3)CO)O)O)O	C20175	161466	HMDB0038137	Prenol lipids	Purine nucleosides	UP
POS12260	LPC(18:2)	12.294	520.339	[M+H]+	520.34	True	5.95877e+09	6.59886e+09	6.27245e+09	3.13902e+09	3.58446e+09	3.5348e+09	0.000251399	1.8356	0.876249	3.41943e+09	2.44105e+08	1.40934e+08	7.13875	6.27669e+09	3.20062e+08	1.84788e+08	5.09921	0.0021874	1.34959	1.34964	3.59964	C26H50NO7P	Lysophosphatidylcholines	SPJFYYJXNPEZDW-FTJOPAKQSA-N	O=C(OCC(O)COP(=O)([O-])OCC[N+](C)(C)C)CCCCCCCC=CCC=CCCCCC	---	---	HMDB0010386	Lipids and lipid-like molecules	Glycerophospholipids	UP
POS1482	1,3-Benzodioxole-5,6-diamine	6.759	153.066	[M+H]+	153.066	True	2.89262e+08	3.07911e+08	2.77796e+08	1.73811e+08	2.49641e+08	1.95612e+08	0.024304	1.41337	0.499143	2.06355e+08	3.90399e+07	2.25397e+07	18.9188	2.91657e+08	1.51999e+07	8.77565e+06	5.21157	0.0618739	1.18908	1.18943	1.61432	C7H8N2O2	Benzodioxoles	SNHKEQOYVVRBQO-UHFFFAOYSA-N	NC1=CC2=C(OCO2)C=C1N	---	3080788	HMDB0244157	Organoheterocyclic compounds	Benzodioxoles	UP
POS114	Acetone cyanohydrin	11.314	86.0605	[M+H]+	86.06	True	1.30047e+08	2.60709e+08	1.33383e+08	1.42907e+08	3.79879e+08	2.40551e+08	0.381217	0.686643	-0.542369	2.54446e+08	1.19095e+08	6.87598e+07	46.8059	1.74713e+08	7.44937e+07	4.30089e+07	42.6377	0.533006	0.603771	0.603204	0.418828	C4H7NO	Organooxygen compounds	MWFMGBPGAXYFAR-UHFFFAOYSA-N	CC(C)(O)C#N	C02659	6406	HMDB0060427	Organic oxygen compounds	Organooxygen compounds	NoSig
NEG1522	N-Butyrylglycine	6.887	144.065	[M-H]-	144.067	True	5.03147e+07	4.43491e+07	4.88611e+07	3.79962e+07	4.1573e+07	4.45938e+07	0.0694006	1.15594	0.209067	4.13876e+07	3.30271e+06	1.90682e+06	7.97995	4.78417e+07	3.11071e+06	1.79597e+06	6.50209	0.140178	1.06189	1.06165	1.15864	C6H11NO3	Amino acids and derivatives	WPSSBBPLVMTKRN-UHFFFAOYSA-N	O=C(O)CN=C(O)CCC	---	88412	HMDB0000808	Organic acids and derivatives	Carboxylic acids and derivatives	NoSig
POS3882	Phenylalanylserine	6.815	253.118	[M+H]+	253.119	True	1.08739e+08	1.17969e+08	1.2048e+08	1.33995e+07	1.63359e+07	1.37396e+07	1.04753e-05	7.98594	2.99746	1.44917e+07	1.60616e+06	927314	11.0833	1.15729e+08	6.18279e+06	3.56963e+06	5.34245	0.000365737	1.36374	1.36377	4.97983	C12H16N2O4	Carboxylic acids and derivatives	ROHDXJUFQVRDAV-UWVGGRQHSA-N	N[C@@H](CC1=CC=CC=C1)C(=O)N[C@@H](CO)C(O)=O	---	193508;7021825	HMDB0029004	Organic acids and derivatives	Carboxylic acids and derivatives	UP
NEG1521	N-(2-Carboxymethyl)-morpholine	3.546	144.065	[M-H]-	144.066	True	1.63889e+07	7.23906e+06	9.81487e+06	1.61045e+07	1.06564e+07	1.1781e+07	0.622427	0.867702	-0.204728	1.28473e+07	2.8763e+06	1.66064e+06	22.3884	1.11476e+07	4.71828e+06	2.7241e+06	42.3254	0.740609	0.351616	0.351964	0.205912	C6H11NO3	Carboxylic acids and derivatives	VIWZVFVJPXTXPA-UHFFFAOYSA-N	OC(=O)CN1CCOCC1	---	438968;1616939	HMDB0061156	Organic acids and derivatives	Carboxylic acids and derivatives	NoSig
POS3094	Phenylalanylglycine	6.961	223.107	[M+H]+	223.108	True	2.30655e+08	2.51847e+08	2.60541e+08	1.26166e+08	6.44193e+07	1.36721e+08	0.0046259	2.27018	1.18281	1.09102e+08	3.90546e+07	2.25482e+07	35.7964	2.47681e+08	1.53722e+07	8.87513e+06	6.20644	0.0164806	1.29096	1.29073	2.3348	C11H14N2O3	Carboxylic acids and derivatives	GLUBLISJVJFHQS-VIFPVBQESA-N	NC(CC1=CC=CC=C1)C(O)=NCC(O)=O	---	98207	HMDB0028995	Organic acids and derivatives	Carboxylic acids and derivatives	UP
NEG14866	Stachyose	1.796	665.215	[M-H]-	665.215	True	1.2047e+07	1.7345e+07	2.94203e+07	3.11706e+06	2.30126e+06	1.83916e+07	0.186923	2.47007	1.30455	7.93666e+06	9.06347e+06	5.2328e+06	114.198	1.96041e+07	8.90424e+06	5.14086e+06	45.4202	0.31184	0.851466	0.851104	0.728338	C24H42O21	Oligosaccharides	UQZIYBXSHAGNOE-XNSRJBNMSA-N	OC[C@H]1O[C@@](CO)(O[C@H]2O[C@H](CO[C@H]3O[C@H](CO[C@H]4O[C@H](CO)[C@H](O)[C@H](O)[C@H]4O)[C@H](O)[C@H](O)[C@H]3O)[C@@H](O)[C@H](O)[C@H]2O)[C@@H](O)[C@@H]1O	C01613	439531	HMDB0003553	Organic oxygen compounds	Organooxygen compounds	NoSig
POS4307	Phe-Thr	6.849	267.134	[M+H]+	267.134	True	5.1603e+07	4.0453e+07	4.61565e+07	6.83851e+06	7.27663e+06	7.53199e+06	0.000272262	6.38479	2.67464	7.21571e+06	350731	202495	4.86066	4.60708e+07	5.57549e+06	3.21901e+06	12.102	0.00222485	1.34896	1.34892	3.56501	C13H18N2O4	Peptides	NYQBYASWHVRESG-MIMYLULJSA-N	C[C@H]([C@@H](C(=O)O)NC(=O)[C@H](CC1=CC=CC=C1)N)O	---	10445608	HMDB0029005	Organic acids and derivatives	Carboxylic acids and derivatives	UP
POS1862	Taurine	1.276	169.986	[M-H+2Na]+	169.986	True	2.29429e+09	2.37224e+09	2.47151e+09	2.021e+09	2.20659e+09	2.0653e+09	0.0206272	1.1343	0.181803	2.09763e+09	9.69243e+07	5.59593e+07	4.62065	2.37934e+09	8.88223e+07	5.12816e+07	3.73306	0.0544416	1.20346	1.20374	1.68556	C2H7NO3S	Organosulfonic acids	XOAAWQZATWQOTB-JLSKMEETNA-N	NCCS(=O)(=O)O	C00245	1123	HMDB0000251	Organic acids and derivatives	Organic sulfonic acids and derivatives	UP
POS2499	Cyclododecalactam	9.869	198.185	[M+H]+	198.185	True	1.70636e+07	1.71465e+07	1.95734e+07	1.53519e+07	1.23769e+07	1.55949e+07	0.0577442	1.24143	0.312007	1.44412e+07	1.79187e+06	1.03454e+06	12.408	1.79278e+07	1.42568e+06	823119	7.95235	0.121661	1.08991	1.08952	1.23849	C12H23NO	Macrolactams	JHWNWJKBPDFINM-UHFFFAOYSA-N	O=C1CCCCCCCCCCCN1	---	13690	---	Phenylpropanoids and polyketides	Macrolactams	NoSig
NEG1142	Creatine	1.002	130.061	[M-H]-	130.062	True	2.78535e+08	3.21384e+08	3.00008e+08	3.26057e+08	3.40388e+08	3.12418e+08	0.149477	0.91936	-0.121298	3.26288e+08	1.39866e+07	8.07514e+06	4.28657	2.99976e+08	2.14246e+07	1.23695e+07	7.1421	0.264342	0.909925	0.909412	0.825427	C4H9N3O2	Amino acids and derivatives	CVSVTCORWBXHQV-UHFFFAOYSA-N	O=C(O)CN(C(=N)N)C	C00300	586	HMDB0000064	Organic acids and derivatives	Carboxylic acids and derivatives	NoSig
NEG1832	Imidazolelactic acid	6.899	155.045	[M-H]-	155.046	True	2.83918e+07	2.7557e+07	3.34103e+07	3.3373e+07	2.87071e+07	3.57332e+07	0.364546	0.913569	-0.130415	3.26044e+07	3.57552e+06	2.06433e+06	10.9664	2.97864e+07	3.166e+06	1.82789e+06	10.629	0.51693	0.621611	0.622219	0.438248	C6H8N2O3	Azoles	JTYMXXCJQKGGFG-UHFFFAOYSA-N	OC(CN1C=CN=C1)C(O)=O	---	459122	HMDB0002320	Organoheterocyclic compounds	Azoles	NoSig
POS340	Dihydro-5-methyl-2(3H)-furanone	1.024	101.06	[M+H]+	101.06	True	8.74749e+07	7.97985e+07	1.18661e+08	1.32446e+08	8.65219e+07	1.40849e+08	0.298855	0.794666	-0.331579	1.19939e+08	2.92435e+07	1.68837e+07	24.382	9.53115e+07	2.05824e+07	1.18832e+07	21.5948	0.443743	0.69979	0.700413	0.524539	C5H8O2	Lactones	GAEKPEKOJKCEMS-UHFFFAOYSA-N	CC1CCC(=O)O1	---	7921	HMDB0033840	Organoheterocyclic compounds	Lactones	NoSig
NEG1591	Glutamic acid	2.657	146.045	[M-H]-	146.046	True	2.90736e+06	5.79965e+06	3.84082e+06	1.96274e+06	4.7896e+06	1.84316e+07	0.45978	0.498248	-1.00506	8.39464e+06	8.8064e+06	5.08438e+06	104.905	4.18261e+06	1.47613e+06	852242	35.292	0.606097	0.516618	0.51711	0.33745	C5H9NO4	Amino acids and derivatives	WHUUTDBJXJRKMK-UHFFFAOYSA-N	C(CC(=O)O)[C@@H](C(=O)O)N	C00025	---	HMDB0000148	Organic acids and derivatives	Carboxylic acids and derivatives	NoSig
NEG759	Fumaric acid	1.059	115.002	[M-H]-	115.004	True	1.26542e+08	1.82757e+08	1.7139e+08	71537639	1.26911e+08	1.46721e+08	0.185623	1.39262	0.4778	1.15057e+08	3.89684e+07	2.24984e+07	33.8689	1.6023e+08	2.97229e+07	1.71605e+07	18.5502	0.310727	0.85299	0.853042	0.731369	C4H4O4	Dicarboxylic acids and derivatives	VZCYOOQTPOCHFL-OWOJBTEDSA-N	C(=C/C(=O)O)\C(=O)O	C00122	444972	HMDB0000134	Organic acids and derivatives	Carboxylic acids and derivatives	NoSig
POS3399	Walleminone	11.79	235.169	[M-H2O+H]+	235.169	True	3.18104e+06	4.47544e+07	6.33172e+07	2.60531e+06	7.85829e+07	4.68435e+07	0.853021	0.868946	-0.202661	4.26772e+07	3.81598e+07	2.20315e+07	89.4148	3.70842e+07	3.07931e+07	1.77784e+07	83.0355	0.915985	0.134873	0.134418	0.0690404	C15H24O3	Sesquiterpenoids	NGQXJSTYWWTPOG-VGYDOTAVSA-N	C[C@H]1[C@@H]([C@@H](CC(=C)[C@@H]2CC([C@@H]2CC1=O)(C)C)O)O	---	15431312	---	Lipids and lipid-like molecules	Prenol lipids	NoSig
POS4331	Adenosine	6.711	268.104	[M+H]+	268.104	True	1.44616e+08	1.60114e+08	1.66354e+08	7.15331e+07	8.5572e+07	7.66183e+07	0.000494462	2.01556	1.01118	7.79078e+07	7.10772e+06	4.10364e+06	9.12324	1.57028e+08	1.11925e+07	6.46201e+06	7.12773	0.00330182	1.34239	1.34248	3.30587	C10H13N5O4	Purine nucleosides	OIRDTQYFTABQOQ-KQYNXXCUSA-N	OCC1OC(N2C=NC=3C(=NC=NC32)N)C(O)C1O	C00212	60961	HMDB0000050	Nucleosides, nucleotides, and analogues	Purine nucleosides	UP
POS2053	2-Benzimidazolecarbamic acid	1.266	178.059	[M+CH3OH+H]+	178.061	True	1.54717e+08	1.0475e+08	1.8071e+08	1.34976e+08	1.57044e+08	1.03436e+08	0.612574	1.11308	0.154559	1.31819e+08	2.69431e+07	1.55556e+07	20.4395	1.46725e+08	3.86054e+07	2.22889e+07	26.3114	0.732276	0.361297	0.361603	0.212842	C8H7N3O2	Benzimidazoles	WEYSQARHSRZNTC-UHFFFAOYSA-N	OC(=O)NC1=NC2=CC=CC=C2N1	---	29128	HMDB0248994	Organoheterocyclic compounds	Benzimidazoles	NoSig
NEG2556	Myoinositol	1.739	179.055	[2M-H]-	179.056	True	4.72043e+07	2.52909e+07	3.80643e+07	2.44751e+07	4.32185e+07	3.60368e+07	0.799296	1.06583	0.091984	3.45768e+07	9.45659e+06	5.45976e+06	27.3495	3.68532e+07	1.10068e+07	6.35479e+06	29.8667	0.879869	0.183993	0.184071	0.0972921	C6H12O6	Organooxygen compounds	CDAISMWEOUEBRE-GPIVLXJGSA-N	O[C@H]1[C@H](O)[C@@H](O)[C@H](O)[C@@H](O)[C@@H]1O	C06153	---	HMDB0006088	Organic oxygen compounds	Organooxygen compounds	NoSig
POS6317	8-Hydroxy-9,10-epoxystearic acid	11.883	337.235	[M+Na]+	337.235	True	5.12195e+07	7.09052e+07	6.44177e+07	3.61538e+07	6.06227e+07	5.98228e+07	0.370305	1.19121	0.252426	5.21998e+07	1.3902e+07	8.02631e+06	26.6322	6.21808e+07	1.00317e+07	5.79178e+06	16.1331	0.522532	0.61538	0.615616	0.43144	C18H34O4	Lineolic acids and derivatives	GQEOLYBERRZZCE-UHFFFAOYSA-N	CCCCCCCCC1OC1C(O)CCCCCCC(O)=O	---	53851542	---	Lipids and lipid-like molecules	Fatty Acyls	NoSig
POS5186	7-Methylguanosine	6.802	298.115	[M+H]+	298.115	True	6.93865e+07	6.78945e+07	7.1298e+07	4.15264e+07	4.35411e+07	4.30039e+07	2.03071e-05	1.62862	0.703646	4.26905e+07	1.04328e+06	602341	2.44384	6.95263e+07	1.70609e+06	985012	2.45388	0.000543297	1.36234	1.36235	4.69235	C11H15N5O5	Purine nucleosides	OGHAROSJZRTIOK-KQYNXXCUSA-N	[O-]C1=NC(=N)NC2=C1[N+](=CN2C3OC(CO)C(O)C3O)C	---	6474236	HMDB0001107	Nucleosides, nucleotides, and analogues	Purine nucleosides	UP
POS2784	Bistris	1.359	210.134	[M+H]+	210.134	True	7.06281e+07	8.28978e+07	8.20299e+07	6.53396e+07	7.0621e+07	7.97071e+07	0.314229	1.09222	0.127258	7.18892e+07	7.26726e+06	4.19576e+06	10.109	7.85186e+07	6.84715e+06	3.95321e+06	8.72043	0.461523	0.681735	0.681592	0.502754	C8H19NO5	Alkanolamines	OWMVSZAMULFTJU-UHFFFAOYSA-N	C(CO)N(CCO)C(CO)(CO)CO	---	81462	HMDB0249241	Organic nitrogen compounds	Organonitrogen compounds	NoSig
POS716	Benzofuran	4.523	119.049	[M+H-H2O]+	119.05	True	7.92571e+08	6.73747e+08	5.09388e+08	9.46742e+08	9.5149e+08	1.20644e+09	0.033882	0.636365	-0.652073	1.03489e+09	1.48586e+08	8.5786e+07	14.3576	6.58569e+08	1.422e+08	8.20993e+07	21.5923	0.0793176	1.15609	1.15638	1.47003	C8H6O	Benzofurans	IANQTJSKSUMEQM-UHFFFAOYSA-N	O1C=CC2=C1C=CC=C2	C14512	9223	HMDB0032929	Organoheterocyclic compounds	Benzofurans	DOWN
NEG3204	5-octenoylglycine	9.643	198.113	[M-H]-	198.113	True	1.73076e+07	1.49745e+07	1.598e+07	1.26053e+07	1.20414e+07	1.39838e+07	0.0224852	1.24932	0.321149	1.28768e+07	999294	576943	7.7604	1.60873e+07	1.17026e+06	675648	7.27439	0.0580909	1.19671	1.19636	1.6481	C10H17NO3	Carboxylic acids and derivatives	MUPWSWBISABXLE-UHFFFAOYSA-N	CCC=CCCCC(O)=NCC(O)=O	---	---	HMDB0094804	Organic acids and derivatives	Carboxylic acids and derivatives	UP
POS1093	3-(2-Methylpropyl)pyridine	13.171	136.112	[M+H]+	136.113	True	7.99777e+07	4.9122e+07	4.9388e+07	9.13255e+07	1.34626e+08	4.48738e+07	0.33131	0.659052	-0.601537	9.0275e+07	4.48852e+07	2.59145e+07	49.7205	5.94959e+07	1.77382e+07	1.02412e+07	29.8142	0.477649	0.661694	0.661075	0.479766	C9H13N	Pyridines and derivatives	DEGXTCKEZCCZOP-UHFFFAOYSA-N	CC(C)CC1=CN=CC=C1	---	61715	HMDB0037287	Organoheterocyclic compounds	Pyridines and derivatives	NoSig
POS448	Guaiacol	4.532	107.05	[M+H-H2O]+	107.049	True	7.23939e+07	1.59223e+08	6.39767e+07	1.11644e+08	1.09288e+08	5.61941e+07	0.870467	1.06664	0.0930701	9.23754e+07	3.1356e+07	1.81034e+07	33.9441	9.85311e+07	5.27286e+07	3.04429e+07	53.5147	0.92735	0.117841	0.118377	0.0602478	C7H8O2	Methoxyphenols	LHGVFZTZFXWLCP-UHFFFAOYSA-N	COc1ccccc1O	C01502	460	HMDB0001398	Benzenoids	Phenols	NoSig
NEG9477	20-Hydroxy-PGF2a	9.494	369.228	[M-H]-	369.228	True	1.1796e+07	1.30687e+07	1.34977e+07	2.35646e+07	2.15754e+07	2.30053e+07	0.00022198	0.562949	-0.828924	2.27151e+07	1.02585e+06	592274	4.51615	1.27875e+07	885007	510959	6.9209	0.00203955	1.35065	1.35071	3.65369	C20H34O6	Fatty Acyls	XQXUYZDBZCLAQO-BFDMEJFDSA-N	OCCCCC[C@H](O)\C=C\C1[C@H](O)C[C@H](O)C1C\C=C/CCCC(O)=O	---	53477777	HMDB0004049	Lipids and lipid-like molecules	Fatty Acyls	DOWN
POS776	2-Methyl-1,4-benzoquinone	4.147	123.044	[M+H]+	123.044	True	7.85207e+08	6.58491e+08	4.07664e+08	3.67849e+08	6.21706e+08	7.38883e+08	0.805638	1.07112	0.0991174	5.76146e+08	1.89666e+08	1.09504e+08	32.9198	6.1712e+08	1.92141e+08	1.10933e+08	31.1352	0.88137	0.178334	0.178186	0.0938599	C7H6O2	Ketones	VTWDKFNVVLAELH-UHFFFAOYSA-N	O=C1C=CC(=O)C(=C1)C	---	11122	---	Organic oxygen compounds	Organooxygen compounds	NoSig
POS808	Histidinol	1.089	124.087	[M+H-H2O]+	124.087	True	9.98919e+07	9.27647e+07	9.15186e+07	1.27328e+08	1.43796e+08	1.16131e+08	0.0152513	0.733819	-0.446503	1.29085e+08	1.39155e+07	8.03414e+06	10.7801	9.47251e+07	4.51779e+06	2.60835e+06	4.76937	0.0426479	1.22742	1.22708	1.81669	C6H11N3O	Aralkylamines	ZQISRDCJNBUVMM-YFKPBYRVSA-N	N[C@H](CO)Cc1cnc[nH]1	C00860	165271	HMDB0003431	Organic nitrogen compounds	Organonitrogen compounds	DOWN
POS360	Cyclopentanone	13.391	102.092	[M+NH4]+	102.091	True	1.42141e+08	1.45363e+08	1.94027e+08	2.02971e+08	1.8119e+08	1.97919e+08	0.136543	0.827256	-0.273594	1.94027e+08	1.14004e+07	6.58202e+06	5.87567	1.6051e+08	2.9071e+07	1.67842e+07	18.1117	0.246099	0.930765	0.930963	0.864731	C5H8O	Ketones	BGTOWKSIORTVQH-UHFFFAOYSA-N	C1CCC(=O)C1	C00557	8452	HMDB0031407	Organic oxygen compounds	Organooxygen compounds	NoSig
NEG1139	N-Acetylalanine	1.965	130.049	[M-H]-	130.051	True	1.06815e+08	1.53791e+08	8.45814e+07	2.58564e+07	1.3594e+08	1.14289e+08	0.589901	1.2503	0.322271	9.20282e+07	5.832e+07	3.36711e+07	63.3719	1.15063e+08	3.53343e+07	2.04002e+07	30.7087	0.720859	0.383607	0.38393	0.229221	C5H9NO3	Amino acids and derivatives	KTHDTJVBEPMMGL-UHFFFAOYSA-N	CC(O)=NC(C)C(=O)O	---	7345	HMDB0000766	Organic acids and derivatives	Carboxylic acids and derivatives	NoSig
POS3255	Prolylhydroxyproline	2.116	229.118	[M+H]+	229.118	True	1.2997e+08	102611961	1.07694e+08	8.81896e+07	6.52886e+07	8.01048e+07	0.0296955	1.45677	0.54277	7.7861e+07	1.16142e+07	6.70547e+06	14.9166	1.13425e+08	1.45517e+07	8.40144e+06	12.8293	0.0713156	1.17049	1.17019	1.52731	C10H16N2O4	Peptides	ONPXCLZMBSJLSP-CSMHCCOUSA-N	O=C(O)C1N(C(=O)C2NCCC2)CC(O)C1	---	11902893	HMDB0006695	Organic acids and derivatives	Carboxylic acids and derivatives	UP
NEG2370	Dehydroascorbic acid	2.317	173.008	[M-H]-	173.009	True	3.18127e+08	3.20694e+08	3.29145e+08	1.24089e+08	2.33628e+08	2.62356e+08	0.051678	1.56105	0.642517	2.06691e+08	7.29636e+07	4.21256e+07	35.3008	3.22655e+08	5.76474e+06	3.32828e+06	1.78666	0.111771	1.10508	1.10505	1.28669	C6H6O6	Gamma butyrolactones	SBJKKFFYIZUCET-JLAZNSOCSA-N	O=C1OC(C(=O)C1=O)C(O)CO	C05422	440667	HMDB0001264	Organoheterocyclic compounds	Lactones	NoSig
NEG703	Creatinine	1.142	112.05	[M-H]-	112.052	True	7.52617e+07	4.62421e+07	6.84745e+07	6.76406e+07	3.51824e+07	9.65332e+07	0.882021	0.952959	-0.0695136	6.64521e+07	3.06927e+07	1.77204e+07	46.1877	6.33261e+07	1.51794e+07	8.7638e+06	23.9701	0.935616	0.106894	0.107771	0.054521	C4H7N3O	Amino acids and derivatives	DDRJAANPRJIHGJ-GLFQYTTQNA-N	CN1CC(=O)N=C1N	C00791	588	HMDB0000562	Organic acids and derivatives	Carboxylic acids and derivatives	NoSig
NEG3062	Gluconic acid	0.906	195.05	[M-H]-	195.051	True	2.86043e+08	2.89863e+08	3.15113e+08	2.22511e+08	2.43517e+08	2.49695e+08	0.00892371	1.24492	0.316054	2.38574e+08	1.425e+07	8.22724e+06	5.97298	2.97006e+08	1.5797e+07	9.12038e+06	5.31874	0.0277994	1.26053	1.26051	2.04945	C6H12O7	Medium-chain hydroxy acids and derivatives	RGHNJXZEOKUKBD-IBOZAKBINA-N	O=C(O)[C@H](O)[C@@H](O)[C@H](O)[C@H](O)CO	C00257	604	HMDB0000625	Organic oxygen compounds	Organooxygen compounds	UP
NEG4722	Pyroglutamylisoleucine	7.766	241.119	[M-H]-	241.119	True	9.43493e+06	1.01154e+07	9.74232e+06	1.31828e+07	1.28063e+07	1.29451e+07	0.000140454	0.752363	-0.410499	1.29781e+07	190376	109914	1.4669	9.76423e+06	340784	196751	3.49012	0.00160406	1.35413	1.35413	3.85247	C11H18N2O4	Peptides	MKCVLTRITQNGQI-UHFFFAOYSA-N	O=C(O)C(NC(=O)C1NC(=O)CC1)C(C)CC	---	21405068	HMDB0341381	Organic acids and derivatives	Carboxylic acids and derivatives	DOWN
POS609	1-Piperidinecarboxaldehyde	7.503	114.092	[M+H]+	114.092	True	3.74804e+08	3.93424e+08	6.37734e+08	6.33401e+08	5.86498e+08	6.94136e+08	0.133844	0.734553	-0.445061	6.38012e+08	5.39669e+07	3.11578e+07	8.4586	4.68654e+08	1.46723e+08	8.47106e+07	31.3073	0.242268	0.935349	0.935569	0.873402	C6H11NO	Piperidines	FEWLNYSYJNLUOO-UHFFFAOYSA-N	O=CN1CCCCC1	---	17429	HMDB0031702	Organoheterocyclic compounds	Piperidines	NoSig
POS9429	2-methoxy-6-[(triphenylmethoxy)methyl]-2H-3,4,5,6-tetrahydropyran-3,4,5-triol	11.858	437.194	[M+H]+	437.196	True	2.46338e+07	3.68935e+07	2.55124e+07	2.55519e+07	3.19848e+07	2.89008e+07	0.965506	1.00697	0.0100181	2.88125e+07	3.21735e+06	1.85754e+06	11.1665	2.90132e+07	6.83866e+06	3.9483e+06	23.5708	0.988752	0.0310053	0.0314497	0.0152449	C26H28O6	Triphenyl compounds	WYAMNJUPQNEGOI-UHFFFAOYSA-N	COC1OC(COC(c2ccccc2)(c2ccccc2)c2ccccc2)C(O)C(O)C1O	---	242528	---	Benzenoids	Triphenyl compounds	NoSig
NEG9742	N-palmitoyl-phosphoethanolamine	11.181	378.241	[M-H]-	378.241	True	2.21891e+07	2.00887e+07	2.06223e+07	1.51924e+07	1.23938e+07	1.45158e+07	0.00275224	1.49399	0.579174	1.4034e+07	1.46021e+06	843054	10.4048	2.09667e+07	1.09174e+06	630318	5.20703	0.0112458	1.30859	1.30838	2.56031	C18H38NO5P	Organic phosphonic acids and derivatives	REFUVLFHSVMCAO-UHFFFAOYSA-N	CCCCCCCCCCCCCCCC(O)=NC(O)CP(O)(O)=O	---	131769777	HMDB0059630	Organic acids and derivatives	Organic phosphonic acids and derivatives	UP
NEG1015	Isethionic acid	1.583	124.99	[M-H]-	124.991	True	4.91638e+06	1.204e+07	9.2626e+06	2.18367e+06	3.25134e+06	4.51094e+06	0.0675585	2.63615	1.39843	3.31531e+06	1.16495e+06	672586	35.1386	8.73966e+06	3.59048e+06	2.07297e+06	41.0826	0.137493	1.06582	1.0659	1.17032	C2H6O4S	Organosulfonic acids	SUMDYPCJJOFFON-UHFFFAOYSA-N	O=S(=O)(O)CCO	C05123	7866	HMDB0003903	Organic acids and derivatives	Organic sulfonic acids and derivatives	NoSig
POS952	4-Oxo-L-proline	7.18	130.05	[M+H-H2O]+	130.05	True	4.95904e+07	4.76739e+07	5.1146e+07	4.62352e+07	5.42384e+07	6.29126e+07	0.367595	0.90834	-0.138696	5.44621e+07	8.34096e+06	4.81565e+06	15.3152	4.94701e+07	1.73919e+06	1.00412e+06	3.51564	0.519308	0.61839	0.618719	0.43463	C5H7NO3	Carboxylic acids and derivatives	HFXAFXVXPMUQCQ-UHFFFAOYSA-N	OC(=O)C1CC(=O)CN1	C01877	413589;74546988	HMDB0246561	Organic acids and derivatives	Carboxylic acids and derivatives	NoSig
NEG2317	trans-3-Octenedioic acid	8.802	171.065	[M-H]-	171.066	True	2.27074e+07	2.0072e+07	1.97018e+07	2.48353e+07	2.19822e+07	2.79105e+07	0.105168	0.836117	-0.258224	2.49093e+07	2.96485e+06	1.71176e+06	11.9026	2.08271e+07	1.63891e+06	946223	7.86911	0.198021	0.9867	0.987279	0.978115	C8H12O4	Fatty Acyls	QWWZNXBOJLOHGI-HNQUOIGGSA-N	OC(=O)CCC\C=C\CC(O)=O	---	22495178	HMDB0013312	Lipids and lipid-like molecules	Fatty Acyls	NoSig
NEG7373	15,16-DiHODE	11.523	311.223	[M-H]-	311.222	True	6.44942e+07	7.51144e+07	7.555e+07	6.4972e+07	6.90007e+07	8.74095e+07	0.803294	0.971888	-0.0411385	7.37941e+07	1.19621e+07	6.90634e+06	16.2102	7.17195e+07	6.26108e+06	3.61484e+06	8.72995	0.879869	0.17995	0.180361	0.0951254	C18H32O4	Fatty Acyls	LKLLJYJTYPVCID-OHPMOLHNSA-N	CCC(O)C(O)C\C=C/C\C=C/CCCCCCCC(O)=O	---	16061068	HMDB0010208	Lipids and lipid-like molecules	Fatty Acyls	NoSig
POS6561	3-(2-(2H,3H-benzo[3,4-e]1,4-dioxin-6-yl)-2-oxoethyl)-3-hydroquinazolin-4-one	10.816	345.087	[M+Na]+	345.085	True	1.17267e+08	1.15511e+08	9.88425e+07	145458164	1.44434e+08	1.16917e+08	0.0856774	0.815174	-0.294819	1.35603e+08	1.61907e+07	9.34771e+06	11.9398	1.1054e+08	1.01684e+07	5.87075e+06	9.19887	0.167249	1.02645	1.02608	1.06713	C18H14N2O4	Quinazolines	ILEYTZZTYFIPGV-UHFFFAOYSA-N	O=C(Cn1cnc2ccccc2c1=O)c1ccc2c(c1)OCCO2	---	2403995	---	Organoheterocyclic compounds	Diazanaphthalenes	NoSig
POS1045	Timonacic	1.459	134.027	[M+H]+	134.027	True	5.07918e+08	2.38568e+08	5.01044e+08	1.01424e+08	4.51472e+07	5.24786e+07	0.0180553	6.26741	2.64787	6.635e+07	3.05956e+07	1.76644e+07	46.1124	4.15843e+08	1.53564e+08	8.866e+07	36.9283	0.0490748	1.21462	1.21449	1.74339	C4H7NO2S	Amino acids and derivatives	DZLNHFMRPBPULJ-UHFFFAOYSA-N	O=C(O)C1NCSC1	---	9934	HMDB0258979	Organic acids and derivatives	Carboxylic acids and derivatives	UP
POS1638	1-(Aminocarbonyl)-L-proline	1.38	159.076	[M+H]+	159.076	True	2.01128e+08	1.76026e+08	2.20613e+08	1.38847e+08	1.18843e+08	1.11094e+08	0.00759634	1.62092	0.696809	1.22928e+08	1.43202e+07	8.26775e+06	11.6492	1.99256e+08	2.23522e+07	1.2905e+07	11.2178	0.0245575	1.26892	1.26889	2.1194	C6H10N2O3	Amino acids and derivatives	RTNFBJXLYMERBB-BYPYZUCNSA-N	O=C(N)N1CCCC1C(=O)O	---	217338	---	Organic acids and derivatives	Carboxylic acids and derivatives	UP
POS777	4-Hydroxybenzaldehyde	4.518	123.044	[M+H]+	123.044	True	1.58686e+09	1.3873e+09	8.93994e+08	2.18898e+09	1.1578e+09	1.55024e+09	0.399775	0.7899	-0.340258	1.63234e+09	5.20473e+08	3.00495e+08	31.8851	1.28939e+09	3.5666e+08	2.05918e+08	27.6613	0.552006	0.582026	0.58237	0.398184	C7H6O2	Aldehydes	RGHHSNMVTDWUBI-UHFFFAOYSA-N	OC1=CC=C(C=O)C=C1	C00633	---	HMDB0011718	Organic oxygen compounds	Organooxygen compounds	NoSig
POS6800	6,15-Diketo-13,14-dihydroprostaglandin F1alpha	9.512	353.232	[M+H-H2O]+	353.229	True	1.00705e+07	1.04208e+07	1.12281e+07	1.91851e+07	1.76463e+07	2.00881e+07	0.000444966	0.557268	-0.843558	1.89732e+07	1.23461e+06	712804	6.50716	1.05731e+07	593647	342742	5.61467	0.00307202	1.34362	1.34376	3.35167	C20H34O6	Prostaglandins and related compounds	KBHLXKOKUVJZIS-MKXGPGLRSA-N	CCCCCC(=O)CC[C@H]1[C@@H](C[C@@H]([C@@H]1CC(=O)CCCCC(=O)O)O)O	---	174013	---	Lipids and lipid-like molecules	Fatty Acyls	DOWN
POS4993	Argininosuccinic acid	1.395	291.13	[M+H]+	291.13	True	2.7697e+07	5.02865e+07	3.86102e+07	4.32349e+07	2.81652e+07	2.97476e+07	0.558963	1.15271	0.205026	3.37159e+07	8.2816e+06	4.78138e+06	24.5629	3.88646e+07	1.12969e+07	6.52225e+06	29.0673	0.697705	0.414671	0.414764	0.252617	C10H18N4O6	Amino acids and derivatives	KDZOASGQNOPSCU-WDSKDSINSA-N	C(C[C@@H](C(=O)O)N)CNC(=N)N[C@@H](CC(=O)O)C(=O)O	C03406	16950;136664755	HMDB0000052	Organic acids and derivatives	Carboxylic acids and derivatives	NoSig
POS845	(1-Methyl-2,3-Dihydropyridin-6-Ylidene)Hydrazine	12.517	126.102	[M+H]+	126.103	True	1.57227e+08	4.32855e+08	1.41153e+08	1.34323e+08	3.06731e+08	4.60133e+08	0.693108	0.811414	-0.30149	3.00396e+08	1.62997e+08	9.41064e+07	54.2608	2.43745e+08	1.63971e+08	9.46688e+07	67.2715	0.794326	0.283798	0.283836	0.159199	C6H11N3	Pyridines and derivatives	LNWMKFPGICKEQH-UHFFFAOYSA-N	CN1CCC=CC1=NN	---	91247425	HMDB0242286	Organoheterocyclic compounds	Pyridines and derivatives	NoSig
POS6257	Bicyclo-Prostaglandin E2	11.719	335.221	[M+H]+	335.222	True	5.8677e+07	7.08456e+07	7.96085e+07	5.41037e+07	5.61493e+07	4.29119e+07	0.0636853	1.3654	0.449321	5.1055e+07	7.12588e+06	4.11413e+06	13.9573	6.97103e+07	1.05118e+07	6.069e+06	15.0793	0.131681	1.0747	1.07502	1.19596	C20H30O4	Prostaglandins and related compounds	CGCZPIJMGKLVTQ-PAJBVNRRSA-N	CCCCC1[C@H]2CC(=O)[C@@H]([C@H]2CCC1=O)C/C=C\CCCC(=O)O	---	5283043	HMDB0060054	Lipids and lipid-like molecules	Fatty Acyls	NoSig
POS1639	1,5-Naphthalenediamine	7.18	159.091	[M+H]+	159.092	True	3.24772e+08	3.62428e+08	3.32631e+08	2.711e+08	2.89075e+08	2.94652e+08	0.01514	1.19302	0.254624	2.84943e+08	1.23078e+07	7.10591e+06	4.31939	3.39944e+08	1.98644e+07	1.14687e+07	5.84345	0.0424335	1.22753	1.22761	1.81988	C10H10N2	Naphthalenes	KQSABULTKYLFEV-UHFFFAOYSA-N	NC1=CC=CC2=C(N)C=CC=C12	C19463	16720	HMDB0244231	Benzenoids	Naphthalenes	UP
NEG15400	SM(d18:1/16:0)	12.386	747.567	[M+FA-H]-	747.566	True	1.32083e+07	451387	1.04709e+07	2.12274e+07	1.76745e+06	9.95508e+06	0.689705	0.732341	-0.449413	1.09833e+07	9.77064e+06	5.64108e+06	88.959	8.04352e+06	6.71592e+06	3.87744e+06	83.4948	0.792123	0.286562	0.28708	0.161337	C39H79N2O6P	Phosphosphingolipids	RWKUXQNLWDTSLO-GWQJGLRPSA-N	[H][C@@](COP([O-])(=O)OCC[N+](C)(C)C)(NC(=O)CCCCCCCCCCCCCCC)[C@H](O)\C=C\CCCCCCCCCCCCC	---	9939941	HMDB0010169	Lipids and lipid-like molecules	Sphingolipids	NoSig
POS1452	6-Hydroxybenzothiazole	9.774	152.016	[M+H]+	152.016	True	2.74228e+07	3.06629e+07	3.28638e+07	3.4087e+07	3.71355e+07	3.20831e+07	0.128884	0.880392	-0.183782	3.44352e+07	2.54412e+06	1.46885e+06	7.38814	3.03165e+07	2.737e+06	1.58021e+06	9.0281	0.233973	0.944631	0.944139	0.889801	C7H5NOS	Benzothiazoles	ORIIXCOYEOIFSN-UHFFFAOYSA-N	OC1=CC2=C(C=C1)N=CS2	---	151811	HMDB0247072	Organoheterocyclic compounds	Benzothiazoles	NoSig
POS2424	Tetraethylene glycol	6.96	195.123	[M+H]+	195.123	True	6.91073e+07	6.58949e+07	7.63246e+07	9.49712e+07	1.01687e+08	9.91153e+07	0.0015249	0.714488	-0.485018	9.85912e+07	3.38857e+06	1.95639e+06	3.43698	7.04423e+07	5.34145e+06	3.08389e+06	7.58273	0.00727901	1.32358	1.32355	2.81676	C8H18O5	Dialkyl ethers	UWHCKJMYHZGTIT-UHFFFAOYSA-N	C(COCCOCCOCCO)O	---	8200	HMDB0094708	Organic oxygen compounds	Organooxygen compounds	DOWN
POS2635	N,N-Dimethylarginine	1.452	203.15	[M+H]+	203.15	True	4.79228e+08	5.00056e+08	5.50981e+08	7.8075e+08	7.59066e+08	7.83809e+08	0.000309807	0.658568	-0.602595	7.74542e+08	1.34891e+07	7.78791e+06	1.74155	5.10088e+08	3.69132e+07	2.13118e+07	7.23662	0.00241137	1.34764	1.34768	3.50891	C8H18N4O2	Amino acids and derivatives	YDGMGEXADBMOMJ-LURJTMIESA-N	CN(C)C(=NCCCC(C(=O)O)N)N	C03626	123831	HMDB0001539	Organic acids and derivatives	Carboxylic acids and derivatives	DOWN
POS176	Putrescine	1.084	89.1079	[M+H]+	89.1073	True	4.0797e+08	4.53223e+08	4.20613e+08	1.87536e+08	2.1074e+08	2.21974e+08	0.000197646	2.06659	1.04726	2.0675e+08	1.75622e+07	1.01395e+07	8.49441	4.27269e+08	2.3349e+07	1.34805e+07	5.4647	0.00191685	1.35164	1.35166	3.70411	C4H12N2	Primary amines	KIDHWZJUCRJVML-UHFFFAOYSA-N	NCCCCN	C00134	1045	HMDB0001414	Organic nitrogen compounds	Organonitrogen compounds	UP
POS134	2-oxo-Butanal	3.269	87.0447	[M+H]+	87.044	True	6.64435e+07	1.21862e+08	6.37825e+07	8.44236e+07	7.77875e+07	8.61705e+07	0.95154	1.01492	0.0213682	8.27938e+07	4.42273e+06	2.55347e+06	5.34186	8.40293e+07	3.27909e+07	1.89318e+07	39.0232	0.981832	0.0440659	0.0441914	0.0215732	C4H6O2	Organooxygen compounds	RWHQMRRVZJSKGX-UHFFFAOYSA-N	CCC(=O)C=O	---	145744	HMDB0252077	Organic oxygen compounds	Organooxygen compounds	NoSig
POS1963	Acetylleucine	8.695	174.113	[M+H]+	174.112	True	2.20091e+07	1.38485e+07	5.45434e+06	8.46045e+06	1.03354e+07	2.33406e+06	0.277393	1.95513	0.967268	7.04332e+06	4.1847e+06	2.41604e+06	59.4138	1.37706e+07	8.27764e+06	4.7791e+06	60.1108	0.418486	0.727093	0.72731	0.556905	C8H15NO3	Amino acids and derivatives	WXNXCEHXYPACJF-UHFFFAOYSA-N	O=C(O)C(N=C(O)C)CC(C)C	C02710	70912	HMDB0011756	Organic acids and derivatives	Carboxylic acids and derivatives	NoSig
POS2233	N,N-Dimethyldecylamine	10.346	186.221	[M+H]+	186.222	True	8.01452e+07	8.49241e+07	8.11405e+07	8.2663e+07	7.68793e+07	7.22291e+07	0.22425	1.0623	0.0871856	7.72571e+07	5.22723e+06	3.01794e+06	6.76602	8.20699e+07	2.52139e+06	1.45573e+06	3.07225	0.355426	0.797345	0.797636	0.649267	C12H27N	Tertiary amines	YWWNNLPSZSEZNZ-UHFFFAOYSA-N	CCCCCCCCCCN(C)C	---	70711	---	Organic nitrogen compounds	Organonitrogen compounds	NoSig
POS5637	Palmitoyl glycerol	12.531	313.273	[M-H2O+H]+	313.273	True	1.38047e+07	1.4527e+07	1.66187e+07	4.01625e+06	2.4017e+06	3.20938e+06	0.000257916	4.66904	2.22313	3.20911e+06	807273	466079	25.1557	1.49834e+07	1.46149e+06	843794	9.75405	0.00219082	1.34945	1.34941	3.58852	C19H38O4	Monoacylglycerols	QHZLMUACJMDIAE-SFHVURJKSA-N	O=C(OCC(O)CO)CCCCCCCCCCCCCCC	---	14900	HMDB0011564	Lipids and lipid-like molecules	Glycerolipids	UP
POS5275	Isotretinoin	10.212	301.215	[M+H]+	301.216	True	2.45485e+07	2.79029e+07	2.74069e+07	1.38177e+07	1.36506e+07	1.32526e+07	0.000249178	1.96112	0.971677	1.35736e+07	290317	167615	2.13884	2.66194e+07	1.81058e+06	1.04534e+06	6.80172	0.0021874	1.34967	1.34972	3.60349	C20H28O2	Retinoids	SHGAZHPCJJPHSC-XFYACQKRSA-N	CC(C=CC1=C(C)CCCC1(C)C)=CC=CC(C)=CC(=O)O	C07058	5282379	HMDB0006219	Lipids and lipid-like molecules	Prenol lipids	UP
NEG13790	LPC(18:1)	12.913	566.34	[M+HCOO]-	566.345	True	1.09271e+08	1.27194e+08	7.16524e+07	3.17311e+07	7.84643e+07	7.91542e+07	0.15575	1.62724	0.702429	6.31165e+07	2.71828e+07	1.5694e+07	43.0676	1.02706e+08	2.83468e+07	1.6366e+07	27.6	0.273065	0.899131	0.899248	0.807573	C26H52NO7P	Lysophosphatidylcholines	YAMUFBLWGFFICM-PTGWMXDISA-N	O=C(OCC(O)COP(=O)([O-])OCC[N+](C)(C)C)CCCCCCCC=CCCCCCCCC	C03916	5313988	HMDB0002815	Lipids and lipid-like molecules	Glycerophospholipids	NoSig
POS1351	Spermidine	1.188	146.165	[M+H]+	146.165	True	5.34787e+08	6.6159e+08	8.37278e+08	8.031e+08	7.43545e+08	1.07791e+09	0.219048	0.774858	-0.367996	8.7485e+08	1.78354e+08	1.02973e+08	20.3868	6.77885e+08	1.51902e+08	8.77009e+07	22.4083	0.351281	0.804438	0.804859	0.659461	C7H19N3	Secondary amines	ATHGHQPFGPMSJY-UHFFFAOYSA-N	NCCCCNCCCN	C00315	1102	HMDB0001257	Organic nitrogen compounds	Organonitrogen compounds	NoSig
POS3564	Pantothenic acid	6.993	242.1	[M+Na]+	242.1	True	5.67297e+07	4.67762e+07	4.41196e+07	3.75465e+07	3.60779e+07	4.08092e+07	0.053615	1.29005	0.36743	3.81445e+07	2.42163e+06	1.39813e+06	6.34855	4.92085e+07	6.64764e+06	3.83802e+06	13.5091	0.114742	1.10027	1.10001	1.27071	C9H17NO5	Amino acids and derivatives	GHOKWGTUZJEAQD-ZETCQYMHSA-N	CC(C)(CO)C(O)C(O)=NCCC(=O)O	C00864	988	HMDB0000210	Organic acids and derivatives	Carboxylic acids and derivatives	NoSig
POS3916	1-Dodecyl-2-pyrrolidinone	10.474	254.248	[M+H]+	254.248	True	3.40991e+08	3.73357e+08	3.79349e+08	1.73111e+08	1.69335e+08	1.73883e+08	8.82734e-05	2.11821	1.08285	1.7211e+08	2.4338e+06	1.40515e+06	1.4141	3.64566e+08	2.06349e+07	1.19136e+07	5.66014	0.0012258	1.35687	1.35688	4.05417	C16H31NO	N-alkylpyrrolidines	NJPQAIBZIHNJDO-UHFFFAOYSA-N	CCCCCCCCCCCCN1CCCC1=O	---	62459	---	Organoheterocyclic compounds	Pyrrolidines	UP
POS1087	Octopamine	4.148	136.076	[M+H-H2O]+	136.075	True	1.78768e+09	1.23538e+09	1.87496e+09	9.0795e+08	8.55118e+08	1.71086e+09	0.237086	1.40994	0.49563	1.15798e+09	4.79542e+08	2.76864e+08	41.412	1.63267e+09	3.46822e+08	2.00238e+08	21.2426	0.368131	0.780676	0.780098	0.625094	C8H11NO2	1-hydroxy-2-unsubstituted benzenoids	QHGUCRYDKWKLMG-QMMMGPOBSA-N	C1=CC(=CC=C1[C@H](CN)O)O	C04227	---	HMDB0004825	Benzenoids	Phenols	NoSig
POS2032	2-(hydroxymethyl)quinazolin-4(3h)-one	1.177	177.061	[M+H]+	177.066	True	9.61876e+07	8.37555e+07	9.7892e+07	1.44679e+08	1.45315e+08	1.61251e+08	0.00118431	0.615708	-0.699682	1.50415e+08	9.38983e+06	5.42122e+06	6.24262	9.26117e+07	7.71689e+06	4.45535e+06	8.33252	0.00609846	1.32862	1.32878	2.92653	C9H8N2O2	Quinazolines	QXGGDTNBLBJSIJ-UHFFFAOYSA-N	O=C1N=C(NC=2C=CC=CC12)CO	---	135505242	---	Organoheterocyclic compounds	Diazanaphthalenes	DOWN
POS2273	3-(Octyloxy)propanamine	9.488	188.201	[M+H]+	188.201	True	2.47087e+07	2.81743e+07	2.95242e+07	4.98968e+07	4.90999e+07	4.34538e+07	0.00128805	0.578498	-0.789617	4.74835e+07	3.5125e+06	2.02794e+06	7.39732	2.74691e+07	2.48402e+06	1.43415e+06	9.04296	0.00644856	1.32726	1.32711	2.89007	C11H25NO	Dialkyl ethers	RDCAZFAKCIEASQ-UHFFFAOYSA-N	CCCCCCCCOCCCN	---	85192	---	Organic oxygen compounds	Organooxygen compounds	DOWN
NEG8494	Methylthioadenosine	6.947	342.088	[M+FA-H]-	342.088	True	1.96141e+07	1.53459e+07	1.74026e+07	5.61868e+06	8.47655e+06	7.89159e+06	0.00257097	2.38154	1.25189	7.32894e+06	1.50973e+06	871644	20.5996	1.74542e+07	2.13457e+06	1.2324e+06	12.2296	0.0106139	1.31039	1.31037	2.5899	C11H15N5O3S	5'-deoxy-5'-thionucleosides	WUUGFSXJNOTRMR-IOSLPCCCSA-N	CSCC1OC(n2cnc3c(N)ncnc32)C(O)C1O	C00170	---	HMDB0001173	Nucleosides, nucleotides, and analogues	5'-deoxyribonucleosides	UP
NEG2177	N-Acetyltaurine	1.404	166.017	[M-H]-	166.017	True	4.4651e+07	5.6174e+07	5.35297e+07	5.81658e+07	6.39379e+07	6.50676e+07	0.0554719	0.82467	-0.278111	6.23904e+07	3.70198e+06	2.13734e+06	5.93358	5.14515e+07	6.03605e+06	3.48491e+06	11.7315	0.11789	1.09537	1.09525	1.25593	C4H9NO4S	Organic sulfonic acids and derivatives	CXJAAWRLVGAKDV-UHFFFAOYSA-N	CC(=O)NCCS(O)(=O)=O	C19478	159864	HMDB0240253	Organic acids and derivatives	Organic sulfonic acids and derivatives	NoSig
NEG490	3-Oxoalanine	14.178	102.018	[M-H2O-H]-	102.019	True	2.03204e+07	1.96402e+07	2.98977e+07	8.79132e+06	1.52559e+07	2.77534e+07	0.405276	1.3486	0.43146	1.72669e+07	9.63968e+06	5.56547e+06	55.8276	2.32861e+07	5.73592e+06	3.31164e+06	24.6324	0.553349	0.576638	0.576259	0.392249	C3H5NO3	Carboxylic acids and derivatives	XMTCKNXTTXDPJX-UHFFFAOYSA-N	NC(C=O)C(O)=O	---	29	HMDB0011602	Organic acids and derivatives	Carboxylic acids and derivatives	NoSig
POS713	Hypoxanthine	6.739	119.035	[M+H-H2O]+	119.035	True	9.4371e+07	1.15807e+08	1.06886e+08	6.17346e+07	5.7277e+07	5.6359e+07	0.00183427	1.80796	0.854366	5.84568e+07	2.87548e+06	1.66016e+06	4.91898	1.05688e+08	1.07681e+07	6.21694e+06	10.1886	0.00827112	1.31921	1.31928	2.73654	C5H4N4O	Purinones	FDGQSTZJBFJUBT-UHFFFAOYSA-N	Oc1ncnc2[nH]cnc12	C00262	135398638	HMDB0000157	Organoheterocyclic compounds	Imidazopyrimidines	UP
POS900	Coniine	11.427	128.144	[M+H]+	128.143	True	5.20529e+07	2.66239e+08	1.01659e+08	2.35908e+08	5.64414e+07	1.60215e+08	0.902169	0.927938	-0.107899	1.50855e+08	9.00986e+07	5.20184e+07	59.7254	1.39984e+08	1.12118e+08	6.47315e+07	80.0937	0.949397	0.0891472	0.0893086	0.0447121	C8H17N	Alkaloids and derivatives	NDNUANOUGZGEPO-UHFFFAOYSA-N	CCCC1CCCCN1	C06523	9985	HMDB0030285	Alkaloids and derivatives	---	NoSig
POS1050	2-Aminobenzimidazole	1.259	134.069	[M+H]+	134.071	True	1.27717e+09	1.28355e+09	1.50875e+09	9.2371e+08	1.01533e+09	9.34736e+08	0.00808019	1.41607	0.501897	9.57925e+08	5.00189e+07	2.88784e+07	5.22159	1.35649e+09	1.319e+08	7.61525e+07	9.7236	0.0255803	1.26566	1.26576	2.09258	C7H7N3	Benzimidazoles	JWYUFVNJZUSCSM-UHFFFAOYSA-N	c1ccc2c(c1)[nH]c(=N)[nH]2	C10901	13624	HMDB0245008	Organoheterocyclic compounds	Benzimidazoles	UP
POS1875	3-Methylhistidine	1.285	170.093	[M+H]+	170.092	True	1.66679e+08	1.53079e+08	1.60018e+08	1.2991e+08	117642062	1.18535e+08	0.00243585	1.31055	0.390172	1.22029e+08	6.8396e+06	3.94884e+06	5.60489	1.59925e+08	6.80025e+06	3.92612e+06	4.25214	0.0102882	1.31199	1.3119	2.61335	C7H11N3O2	Amino acids and derivatives	JDHILDINMRGULE-LURJTMIESA-N	O=C(O)C(N)CC1=CN=CN1C	C01152	64969;6971061	HMDB0000479	Organic acids and derivatives	Carboxylic acids and derivatives	UP
NEG8562	10-HDoHE	12.524	343.227	[M-H]1-	343.228	True	8.25824e+07	7.1805e+07	7.11243e+07	1.83146e+08	1.92018e+08	2.31921e+08	0.00118775	0.371466	-1.4287	2.02362e+08	2.59808e+07	1.5e+07	12.8388	7.51706e+07	6.4278e+06	3.71109e+06	8.55096	0.00609846	1.32858	1.32872	2.92527	C22H32O3	Very long-chain fatty acids	DDCYKEYDTGCKAS-SKSHMZPZSA-N	CC\C=C/C\C=C/C\C=C/C=C/C(O)C\C=C/C\C=C/CCC(O)=O	---	11537494	HMDB0060037	Lipids and lipid-like molecules	Fatty Acyls	DOWN
POS2680	Ketopinic Acid	12.801	205.086	[M+Na]+	205.084	True	5.28575e+07	5.67848e+07	5.49277e+07	5.48872e+07	6.36242e+07	6.69098e+07	0.138435	0.887547	-0.172105	6.1807e+07	6.21388e+06	3.58759e+06	10.0537	5.48566e+07	1.96459e+06	1.13426e+06	3.58132	0.24841	0.927738	0.927757	0.858755	C10H14O3	Bicyclic monoterpenoids	WDODWBQJVMBHCO-LDWIPMOCSA-N	CC1(C)C2CCC1(C(=O)O)C(=O)C2	---	739183	---	Lipids and lipid-like molecules	Prenol lipids	NoSig
POS6907	Arachidoyl Ethanolamide	11.499	356.351	[M+H]+	356.352	True	7.1991e+07	9.08706e+07	8.56375e+07	2.86096e+07	3.46187e+07	2.35565e+07	0.00113577	2.86339	1.51773	2.89283e+07	5.53802e+06	3.19737e+06	19.144	8.2833e+07	9.74725e+06	5.62758e+06	11.7673	0.00595975	1.32943	1.32958	2.94471	C22H45NO2	Alkanolamines	AUJVQJHODMISJP-UHFFFAOYSA-N	CCCCCCCCCCCCCCCCCCCC(=O)NCCO	---	3787294	HMDB0248559	Organic nitrogen compounds	Organonitrogen compounds	UP
POS5194	-N-(2-hydroxyethyl)hexadec-9-enamide	12.938	298.273	[M+H]+	298.274	True	2.30526e+07	3.0665e+07	3.22125e+07	2.21892e+07	2.25865e+07	2.64904e+07	0.195211	1.20576	0.269948	2.37554e+07	2.37692e+06	1.37232e+06	10.0058	2.86434e+07	4.9032e+06	2.83086e+06	17.1181	0.321912	0.838964	0.838881	0.709496	C18H35NO2	Alkanolamines	WFRLANWAASSSFV-FPLPWBNLSA-N	CCCCCC/C=C\CCCCCCCC(NCCO)=O	---	9835868	HMDB0013648	Organic nitrogen compounds	Organonitrogen compounds	NoSig
NEG6418	Thymidine	6.794	287.088	[M+FA-H]-	287.089	True	1.44415e+08	1.35709e+08	1.2845e+08	1.13054e+08	1.24749e+08	1.24719e+08	0.0638254	1.12703	0.172526	1.20841e+08	6.74372e+06	3.89349e+06	5.58066	1.36191e+08	7.9935e+06	4.61505e+06	5.86932	0.131748	1.0747	1.07469	1.19501	C10H14N2O5	Pyrimidine 2'-deoxyribonucleosides	IQFYYKKMVGJFEH-UHFFFAOYSA-N	Cc1cn(C2CC(O)C(CO)O2)c(=O)nc1O	C00214	5789	HMDB0000273	Nucleosides, nucleotides, and analogues	Pyrimidine nucleosides	NoSig
NEG119	Methyl acrylate	2.537	85.0278	[M-H]-	85.0289	True	2.69332e+07	2.57087e+07	4.07523e+07	1.01133e+07	1.87036e+07	2.10966e+07	0.0688229	1.87112	0.903904	1.66378e+07	5.77569e+06	3.3346e+06	34.7142	3.11314e+07	8.35442e+06	4.82342e+06	26.836	0.139472	1.06302	1.06298	1.16227	C4H6O2	Carboxylic acids and derivatives	BAPJBEWLBFYGME-UHFFFAOYSA-N	COC(=O)C=C	C19443	7294	HMDB0033977	Organic acids and derivatives	Carboxylic acids and derivatives	NoSig
POS4778	Oxolinic acid	9.681	284.056	[M+Na]+	284.053	True	9.50591e+06	8.73853e+06	1.06545e+07	350840	1.753e+06	1.40558e+06	0.000265985	8.23469	3.04171	1.16981e+06	730209	421586	62.4213	9.633e+06	964309	556744	10.0105	0.00222485	1.34912	1.34913	3.57514	C13H11NO5	Quinoline carboxylic acids	KYGZCKSPAKDVKC-UHFFFAOYSA-N	CCn1cc(C(=O)O)c(=O)c2cc3c(cc21)OCO3	C11342	4628	HMDB0255996	Organoheterocyclic compounds	Quinolines and derivatives	UP
POS4645	Tyrosylproline	6.952	279.134	[M+H]+	279.134	True	6.7519e+07	6.92992e+07	7.05653e+07	2.87812e+07	2.68779e+07	3.04722e+07	7.70774e-06	2.40776	1.26769	2.87105e+07	1.79819e+06	1.03819e+06	6.26319	6.91278e+07	1.53038e+06	883567	2.21385	0.000336388	1.36432	1.36428	5.11307	C14H18N2O4	Peptides	VNYDHJARLHNEGA-RYUDHWBXSA-N	C1C[C@H](N(C1)C(=O)[C@H](CC2=CC=C(C=C2)O)N)C(=O)O	---	9795637	HMDB0029113	Organic acids and derivatives	Carboxylic acids and derivatives	UP
NEG1175	3-Ureidopropionic acid	0.851	131.045	[M-H]-	131.046	True	8.61787e+07	7.95552e+07	7.67372e+07	1.0158e+08	9.91261e+07	9.36474e+07	0.00905722	0.82374	-0.279738	9.81179e+07	4.06138e+06	2.34484e+06	4.13928	8.08237e+07	4.84686e+06	2.79833e+06	5.99683	0.0280201	1.25978	1.25971	2.043	C4H8N2O3	Ureas	JSJWCHRYRHKBBW-UHFFFAOYSA-N	C(CNC(=O)N)C(=O)O	C02642	111	HMDB0000026	Organic acids and derivatives	Organic carbonic acids and derivatives	DOWN
POS717	Benzofuran	4.146	119.049	[M+H]+	119.05	True	1.91428e+08	2.652e+08	3.87502e+08	2.16669e+08	2.85873e+08	2.55822e+08	0.661602	1.11309	0.154576	2.52788e+08	3.47019e+07	2.00351e+07	13.7277	2.81377e+08	9.90329e+07	5.71767e+07	35.1958	0.77269	0.31378	0.313999	0.179403	C8H6O	Benzofurans	IANQTJSKSUMEQM-UHFFFAOYSA-N	O1C=CC2=C1C=CC=C2	C14512	9223	HMDB0032929	Organoheterocyclic compounds	Benzofurans	NoSig
POS12812	Butyryl-n-trihexylcitrate	12.72	537.34	[M+Na]+	537.34	True	1.00685e+07	1.19858e+07	1.13527e+07	1.21518e+07	1.15556e+07	1.2373e+07	0.220655	0.925905	-0.111064	1.20268e+07	422779	244092	3.51531	1.11357e+07	976881	564002	8.77254	0.352471	0.802536	0.80262	0.656286	C28H50O8	Tetracarboxylic acids and derivatives	GWVUTNGDMGTPFE-UHFFFAOYSA-N	CCCCCCOC(=O)CC(CC(=O)OCCCCCC)(C(=O)OCCCCCC)OC(=O)CCC	---	133914	HMDB0247498	Organic acids and derivatives	Carboxylic acids and derivatives	NoSig
NEG16277	PI(18:1/20:4)	13.507	883.537	[M-H]-	883.534	True	7.20835e+06	9.35926e+06	8.29325e+06	1.11795e+07	1.20474e+07	9.20212e+06	0.073435	0.766624	-0.383409	1.08097e+07	1.45823e+06	841912	13.4901	8.28695e+06	1.07547e+06	620923	12.9779	0.146391	1.05302	1.05251	1.1341	C47H81O13P	Phosphatidylinositols	SSZPKZKUQCKMKS-YDHZRSOTSA-N	CCCCCCCC\C=C/CCCCCCCC(=O)OCC(COP(O)(=O)OC1C(O)C(O)C(O)C(O)C1O)OC(=O)CCCCCC\C=C/C\C=C/C\C=C/C\C=C/CC	---	---	HMDB0009832	Lipids and lipid-like molecules	Glycerophospholipids	NoSig
POS1349	Deoxycarnitine	1.452	146.118	[M+H]+	146.118	True	3.64499e+08	3.45081e+08	4.05269e+08	2.41749e+08	2.54301e+08	2.36348e+08	0.00233214	1.52219	0.606147	2.44133e+08	9.21111e+06	5.31804e+06	3.77299	3.71616e+08	3.07187e+07	1.77354e+07	8.26624	0.0100384	1.31307	1.31311	2.63225	C7H15NO2	Straight chain fatty acids	JHPNVNIEXXLNTR-UHFFFAOYSA-N	O=C([O-])CCC[N+](C)(C)C	C01181	725	HMDB0001161	Lipids and lipid-like molecules	Fatty Acyls	UP
NEG1554	Glutamine	1.052	145.06	[M-H]-	145.062	True	3.0397e+08	2.81423e+08	2.70635e+08	1.66809e+08	1.95141e+08	1.89547e+08	0.00149254	1.55219	0.634304	1.83832e+08	1.50058e+07	8.66359e+06	8.16275	2.85343e+08	1.70096e+07	9.82051e+06	5.96112	0.0071525	1.324	1.32402	2.82607	C5H10N2O3	Amino acids and derivatives	ZDXPYRJPNDTMRX-VKHMYHEASA-N	C(CC(=O)N)[C@@H](C(=O)O)N	C00064	5961;6992086	HMDB0000641	Organic acids and derivatives	Carboxylic acids and derivatives	UP
POS607	Creatinine	6.168	114.067	[M+H]+	114.066	True	5.63578e+08	3.28739e+08	1.16204e+09	2.70404e+08	4.19816e+08	4.96508e+08	0.323071	1.73111	0.791696	3.95576e+08	1.14985e+08	6.63865e+07	29.0677	6.84785e+08	4.29668e+08	2.48069e+08	62.745	0.470551	0.671045	0.670922	0.490703	C4H7N3O	Amino acids and derivatives	DDRJAANPRJIHGJ-GLFQYTTQNA-N	N=C1N=C(O)CN1C	C00791	588	HMDB0000562	Organic acids and derivatives	Carboxylic acids and derivatives	NoSig
NEG2878	4-Nitroquinoline-N-oxide	1.591	189.033	[M-H]-	189.031	True	1.09098e+07	8.42801e+06	9.40829e+06	8.20964e+07	9.81149e+07	1.06209e+08	0.000271034	0.100363	-3.3167	9.54735e+07	1.22716e+07	7.08498e+06	12.8534	9.58202e+06	1.24996e+06	721664	13.0448	0.00222485	1.34893	1.34896	3.56698	C9H6N2O3	4-nitroquinoline N-oxides	YHQDZJICGQWFHK-UHFFFAOYSA-N	O=N(=O)C1=CC=N(=O)C=2C=CC=CC12	C03474	5955	HMDB0246549	Organoheterocyclic compounds	Quinolines and derivatives	DOWN
NEG5616	P-Nitrophenyl Glutamine	2.316	266.078	[M-H]-	266.078	True	8.90869e+07	8.71441e+07	1.0094e+08	4.76317e+07	7.86627e+07	5.07784e+07	0.0362131	1.5653	0.646436	5.90243e+07	1.708e+07	9.86112e+06	28.9372	9.23905e+07	7.46792e+06	4.31161e+06	8.083	0.0842903	1.14867	1.14903	1.44113	C11H13N3O5	Amino acids and derivatives	IMTMBDXEKMXETQ-VIFPVBQESA-N	NC(=O)CC[C@H](NC1=CC=C(C=C1)[N+]([O-])=O)C(O)=O	---	21115778	---	Organic acids and derivatives	Carboxylic acids and derivatives	UP
POS4991	Inosine	6.742	291.07	[M+Na]+	291.07	True	1.23357e+07	1.15944e+07	2.11602e+07	1.09304e+07	1.3454e+07	1.41144e+07	0.532729	1.17121	0.228003	1.2833e+07	1.68039e+06	970171	13.0943	1.50301e+07	5.32171e+06	3.07249e+06	35.407	0.673211	0.441335	0.441278	0.273494	C10H12N4O5	Purine nucleosides	UGQMRVRMYYASKQ-KQYNXXCUSA-N	OC[C@H]1O[C@@H](n2cnc3c(O)ncnc32)[C@H](O)[C@@H]1O	C00294	135398641	HMDB0000195	Nucleosides, nucleotides, and analogues	Purine nucleosides	NoSig
POS2228	2,3-dihydro-1H-carbazol-4(9H)-one	2.319	186.087	[M+H]+	186.091	True	1.65892e+08	1.6971e+08	1.58463e+08	2.6706e+08	2.54238e+08	2.95755e+08	0.00106457	0.604692	-0.725727	2.72351e+08	2.12586e+07	1.22737e+07	7.80559	1.64688e+08	5.7192e+06	3.30198e+06	3.47274	0.00568079	1.33062	1.33079	2.97283	C12H11NO	Carbazoles	DSXKDTZEIWTHRO-UHFFFAOYSA-N	O=C1C=2C=3C=CC=CC3NC2CCC1	---	929130	---	Organoheterocyclic compounds	Indoles and derivatives	DOWN
POS1695	5-Methyl DL-Glutamate	2.098	162.076	[M+H-H2O]+	162.077	True	4.16313e+08	6.262e+08	4.27777e+08	1.27161e+08	1.21353e+08	1.38997e+08	0.00616117	3.79419	1.92379	1.2917e+08	8.99191e+06	5.19148e+06	6.96128	4.90097e+08	1.18008e+08	6.8132e+07	24.0785	0.0209137	1.27872	1.27879	2.21034	C6H11NO4	Carboxylic acids and derivatives	ZGEYCCHDTIDZAE-BYPYZUCNSA-N	COC(=O)CC[C@H](N)C(O)=O	---	68662;6998933	HMDB0061715	Organic acids and derivatives	Carboxylic acids and derivatives	UP
POS356	L-3-Aminodihydro-2(3H)-furanone	2.41	102.055	[M+NH4]+	102.055	True	3.48732e+08	1.90888e+08	2.96266e+08	1.53503e+08	1.59537e+08	2.18151e+08	0.116127	1.57361	0.654075	1.77064e+08	3.571e+07	2.06172e+07	20.1679	2.78628e+08	8.03864e+07	4.64111e+07	28.8508	0.213716	0.967218	0.966866	0.935066	C4H7NO2	Carboxylic acids and derivatives	QJPWUUJVYOJNMH-UHFFFAOYSA-N	NC1CCOC1=O	C02926	73509	HMDB0029387	Organic acids and derivatives	Carboxylic acids and derivatives	NoSig
POS487	4-Vinylcyclohexene	11.091	109.101	[M+H-H2O]+	109.101	True	5.14374e+07	5.95319e+07	6.82543e+07	3.63907e+07	5.02132e+07	5.4508e+07	0.157277	1.27008	0.344921	4.70373e+07	9.46698e+06	5.46577e+06	20.1265	5.97412e+07	8.41039e+06	4.85574e+06	14.078	0.275012	0.896792	0.8968	0.803334	C8H12	Unsaturated hydrocarbons	BBDKZWKEPDTENS-UHFFFAOYSA-N	C=CC1CCC=CC1	C19310	7499	HMDB0246592	Hydrocarbons	Unsaturated hydrocarbons	NoSig
POS4767	Trans-Oleic Acid	13.357	283.263	[M+H]+	283.263	True	1.15372e+06	3.5107e+07	2.98257e+07	619254	3.39556e+07	3.47463e+07	0.947607	0.953338	-0.0689406	2.3107e+07	1.9479e+07	1.12462e+07	84.299	2.20288e+07	1.82702e+07	1.05483e+07	82.9377	0.980075	0.0480152	0.0477803	0.0233718	C18H34O2	Long-chain fatty acids	ZQPPMHVWECSIRJ-MDZDMXLPSA-N	CCCCCCCC/C=C/CCCCCCCC(=O)O	C01712	637517	HMDB0000573	Lipids and lipid-like molecules	Fatty Acyls	NoSig
NEG2874	Dobesilic acid	7.343	188.985	[M-H]-	188.986	True	1.74151e+08	1.58868e+08	1.74209e+08	1.46422e+08	1.61426e+08	1.59323e+08	0.12637	1.08574	0.118682	1.55724e+08	8.12413e+06	4.69047e+06	5.21701	1.69076e+08	8.84055e+06	5.1041e+06	5.22875	0.229798	0.948556	0.948537	0.898356	C6H6O5S	Benzenesulfonic acids and derivatives	IKQCSJBQLWJEPU-UHFFFAOYSA-N	OC1=CC=C(O)C(=C1)S(O)(=O)=O	---	---	HMDB0245498	Benzenoids	Benzene and substituted derivatives	NoSig
NEG2554	Monomethyl phthalate	9.149	179.034	[M-H]-	179.035	True	5.82173e+07	5.84476e+07	6.0823e+07	9.52349e+07	1.00382e+08	9.79783e+07	2.2272e-05	0.604532	-0.726108	9.78651e+07	2.57541e+06	1.48691e+06	2.63159	5.91626e+07	1.44254e+06	832849	2.43826	0.000567008	1.36215	1.36211	4.65224	C9H8O4	Benzoic acid esters	FNJSWIPFHMKRAT-UHFFFAOYSA-N	COC(=O)C1=C(C=CC=C1)C(O)=O	---	20392	HMDB0002130	Benzenoids	Benzene and substituted derivatives	DOWN
NEG11402	Vilazodone	9.36	440.211	[M-H]-	440.209	True	1.28503e+07	1.17567e+07	1.30845e+07	1.20647e+07	1.09688e+07	1.19893e+07	0.175246	1.0762	0.105946	1.16743e+07	612095	353393	5.24312	1.25638e+07	708733	409187	5.64105	0.298416	0.869233	0.868713	0.756353	C26H27N5O2	Diazinanes	SGEGOXDYSFKCPT-UHFFFAOYSA-N	NC(=O)C1=CC2=C(O1)C=CC(=C2)N1CCN(CCCCC2=CNC3=C2C=C(C=C3)C#N)CC1	---	6918314	HMDB0015637	Organoheterocyclic compounds	Diazinanes	NoSig
NEG3358	Adipoylglycine	6.761	202.071	[M-H]-	202.072	True	2.51883e+07	2.10045e+07	2.3158e+07	77108.3	1.63494e+07	1.6704e+07	0.0979837	2.09326	1.06575	1.10435e+07	9.49882e+06	5.48415e+06	86.0128	2.31169e+07	2.0922e+06	1.20793e+06	9.05049	0.18738	1.00115	1.00118	1.00885	C8H13NO5	Carboxylic acids and derivatives	UJHDYVYBNDNRRQ-UHFFFAOYSA-N	OC(=O)CCCCC(=O)NCC(O)=O	---	60941336	HMDB0240731	Organic acids and derivatives	Carboxylic acids and derivatives	NoSig
NEG5148	4-Methylene-2-octyl-5-oxotetrahydrofuran-3-carboxylic acid	11.287	253.144	[M-H]-	253.145	True	1.6725e+07	1.77824e+07	1.91178e+07	1.76136e+07	1.77167e+07	2.17973e+07	0.491091	0.938692	-0.0912769	1.90426e+07	2.38624e+06	1.37769e+06	12.5311	1.78751e+07	1.19907e+06	692283	6.70805	0.635041	0.483629	0.484147	0.308838	C14H22O4	Lactones	VCWLZDVWHQVAJU-UHFFFAOYSA-N	CCCCCCCCC1OC(=O)C(=C)C1C(O)=O	---	4248455	HMDB0249518	Organoheterocyclic compounds	Lactones	NoSig
POS3500	3,6,9,12-Tetraoxatetradecane-1,14-diol	7.074	239.149	[M+H]+	239.149	True	5.19585e+07	5.56212e+07	5.74662e+07	7.33611e+07	7.54709e+07	7.63442e+07	0.000407404	0.732963	-0.448188	7.50587e+07	1.53365e+06	885451	2.04326	5.50153e+07	2.8034e+06	1.61854e+06	5.09567	0.00287773	1.3448	1.34479	3.38998	C10H22O6	Dialkyl ethers	JLFNLZLINWHATN-UHFFFAOYSA-N	OCCOCCOCCOCCOCCO	---	62551	HMDB0256256	Organic oxygen compounds	Organooxygen compounds	DOWN
POS3194	Vitamin K1	10.179	226.18	[M+2H]+	226.182	True	4.08022e+08	4.29117e+08	4.71357e+08	5.24977e+08	5.21255e+08	5.60273e+08	0.0113613	0.814498	-0.296017	5.35502e+08	2.15333e+07	1.24323e+07	4.02114	4.36165e+08	3.22504e+07	1.86198e+07	7.39409	0.0338361	1.24644	1.24659	1.94457	C31H46O2	Vitamin K compounds	MBWXNTAXLNYFJB-NKFFZRIASA-N	CC(=CCC1=C(C)C(=O)c2ccccc2C1=O)CCCC(C)CCCC(C)CCCC(C)C	C02059	5280483	HMDB0003555	Lipids and lipid-like molecules	Prenol lipids	DOWN
POS895	gamma-Guanidinobutyric acid	13.081	128.082	[M+H-H2O]+	128.082	True	5.04901e+07	4.2927e+07	1.9467e+08	5.09008e+07	9.56453e+07	5.24424e+07	0.595052	1.44776	0.533822	6.63295e+07	2.53999e+07	1.46646e+07	38.2935	9.60292e+07	8.55095e+07	4.93689e+07	89.0453	0.723536	0.378662	0.378839	0.225445	C5H11N3O2	Amino acids and derivatives	TUHVEAJXIMEOSA-UHFFFAOYSA-N	N=C(N)NCCCC(=O)O	C01035	500;25200642	HMDB0003464	Organic acids and derivatives	Carboxylic acids and derivatives	NoSig
NEG2986	2-Methylhippuric acid	8.559	192.065	[M-H]-	192.067	True	1.20655e+07	1.74866e+07	1.70482e+07	2.57158e+07	2.67159e+07	2.86582e+07	0.00407317	0.574674	-0.799185	2.703e+07	1.49616e+06	863810	5.53519	1.55334e+07	3.0113e+06	1.73858e+06	19.3859	0.0151034	1.29549	1.2955	2.39007	C10H11NO3	Benzamides	YOEBAVRJHRCKRE-UHFFFAOYSA-N	O=C(O)CN=C(O)C=1C=CC=CC1C	---	91637	HMDB0011723	Benzenoids	Benzene and substituted derivatives	DOWN
POS3684	Cerulenin	2.178	246.108	[M+Na]+	246.11	True	330736	927504	536298	420981	185345	382631	0.229721	1.81458	0.859633	329652	126437	72998.2	38.3546	598179	303158	175029	50.6802	0.360358	0.790143	0.790114	0.6388	C12H17NO3	Oxirane carboxylic acids and derivatives	GVEZIHKRYBHEFX-NQQPLRFYSA-N	CC=CCC=CCCC(=O)C1OC1C(=N)O	C12058	5282054	HMDB0015168	Organoheterocyclic compounds	Epoxides	NoSig
NEG2018	Allose	6.897	161.044	[M-H2O-H]-	161.045	True	2.19255e+07	1.75088e+07	4.34445e+07	3.64632e+07	6.15503e+07	2.58495e+07	0.361567	0.669117	-0.57967	4.12877e+07	1.83328e+07	1.05845e+07	44.4027	2.76263e+07	1.38758e+07	8.0112e+06	50.2269	0.514359	0.626215	0.625649	0.441812	C6H12O6	Monosaccharides	WQZGKKKJIJFFOK-HOWGCPQDSA-N	C([C@@H]1[C@H]([C@H]([C@H](C(O1)O)O)O)O)O	C01487	439507	HMDB0001151	Organic oxygen compounds	Organooxygen compounds	NoSig
POS6056	Stearoylethanolamide	13.153	328.32	[M+H]+	328.321	True	3309.03	4.52207e+07	4.23848e+07	3309.03	1.50389e+07	1.45396e+07	0.278319	2.96157	1.56636	9.86061e+06	8.54033e+06	4.93076e+06	86.6105	2.92029e+07	2.53273e+07	1.46228e+07	86.7288	0.419365	0.725914	0.726134	0.555458	C20H41NO2	Alkanolamines	OTGQIQQTPXJQRG-UHFFFAOYSA-N	CCCCCCCCCCCCCCCCCC(=O)NCCO	---	27902	HMDB0013078	Organic nitrogen compounds	Organonitrogen compounds	NoSig
POS6049	N-Fructosyl phenylalanine	6.913	328.139	[M+H]+	328.139	True	1.6499e+08	1.45997e+08	1.47019e+08	3.34686e+08	3.24695e+08	3.47733e+08	3.58191e-05	0.45477	-1.13679	3.35705e+08	1.15528e+07	6.66998e+06	3.44134	1.52669e+08	1.06827e+07	6.16768e+06	6.99733	0.0006734	1.36062	1.36069	4.44588	C15H21NO7	N-Fructosyl amino acids	FAVRCIXPIVJIPN-VJDSNFAGSA-N	O=C(O)C(NCC1(O)(OC(CO)C(O)C1(O)))CC2=CC=CC=C2	---	85152457	HMDB0037846	Organic acids and derivatives	Carboxylic acids and derivatives	DOWN
POS23079	PC(O-18:1/20:4)	12.46	794.604	[M+H]+	794.606	True	3.94915e+07	3.81196e+07	3.36711e+07	1.27505e+07	2.23262e+07	3.08439e+07	0.0517724	1.68813	0.755424	2.19735e+07	9.05185e+06	5.22609e+06	41.1944	3.70941e+07	3.04267e+06	1.75669e+06	8.20258	0.111777	1.10498	1.1048	1.2859	C46H84NO7P	1-alkyl,2-acylglycero-3-phosphocholines	VJNPDLZENXBRLB-MQEDXBOASA-N	[H][C@@](COCCCCCCCC\C=C/CCCCCCCC)(COP([O-])(=O)OCC[N+](C)(C)C)OC(=O)CCC\C=C/C\C=C/C\C=C/C\C=C/CCCCC	---	---	HMDB0013432	Lipids and lipid-like molecules	Glycerophospholipids	NoSig
POS7708	Phytosphingosine acetamide	10.578	382.294	[M+Na]+	382.293	True	5.0267e+07	5.09205e+07	5.48628e+07	2.75851e+07	2.99475e+07	2.98346e+07	0.000148598	1.78614	0.836849	2.91224e+07	1.33253e+06	769335	4.57561	5.20168e+07	2.4863e+06	1.43547e+06	4.7798	0.00164719	1.35374	1.35375	3.82799	C20H41NO4	Phytoceramides	SZUJJDLBXJCDNT-ZCNNSNEGSA-N	CCCCCCCCCCCCCCC(O)C(O)C(CO)N=C(C)O	---	9798946	---	Lipids and lipid-like molecules	Sphingolipids	UP
POS4300	Uridine	5.166	267.059	[M+Na]+	267.059	True	4.6474e+08	3.9883e+08	4.62422e+08	2.38007e+08	9.48226e+07	2.26263e+08	0.00728292	2.37168	1.24591	1.86364e+08	7.94946e+07	4.58962e+07	42.6555	4.41997e+08	3.74022e+07	2.15942e+07	8.46208	0.0237326	1.27126	1.27096	2.13769	C9H12N2O6	Pyrimidine nucleosides	DRTQHJPVMGBUCF-UHFFFAOYSA-N	O=C1C=CN(C(=O)N1)C2OC(CO)C(O)C2O	C00299	6029	HMDB0000296	Nucleosides, nucleotides, and analogues	Pyrimidine nucleosides	UP
POS2954	Valylvaline	6.835	217.155	[M+H]+	217.155	True	5.17998e+07	5.2351e+07	6.00009e+07	1.54208e+07	16530299	1.54904e+07	0.000129201	3.46009	1.79081	1.58138e+07	621451	358795	3.9298	5.47172e+07	4.58409e+06	2.64663e+06	8.37779	0.00151812	1.35466	1.35467	3.88873	C10H20N2O3	Peptides	KRNYOVHEKOBTEF-UHFFFAOYSA-N	CC(C)[C@@H](C(=O)N[C@@H](C(C)C)C(=O)O)N	---	107475	HMDB0029140	Organic acids and derivatives	Carboxylic acids and derivatives	UP
POS382	DL-Cycloserine	6.914	103.055	[M+H]+	103.05	True	2.7448e+09	2.65888e+09	3.03916e+09	2.46483e+09	2.61597e+09	2.72145e+09	0.19442	1.0821	0.113837	2.60075e+09	1.28981e+08	7.44674e+07	4.95939	2.81428e+09	1.99433e+08	1.15143e+08	7.08647	0.321056	0.840197	0.840038	0.711259	C3H6N2O2	Amino acids and derivatives	DYDCUQKUCUHJBH-UHFFFAOYSA-N	O=C1NOCC1N	C08057	6234;51670069	HMDB0014405	Organoheterocyclic compounds	Azolines	NoSig
POS4814	Oxysophocarpine	7.352	285.155	[M+Na]+	285.157	True	1.68139e+07	1.75922e+07	1.6161e+07	1.79129e+07	2.00217e+07	2.17339e+07	0.0618976	0.847467	-0.238772	1.98895e+07	1.91392e+06	1.105e+06	9.62278	1.68557e+07	716530	413689	4.25097	0.128857	1.07919	1.07932	1.20833	C15H22N2O2	Matrine alkaloids	QMGGMESMCJCABO-LHDUFFHYSA-N	O=C1C=CCC2N1CC3CCC[N+]4([O-])CCCC2C34	---	161544	HMDB0256022	Alkaloids and derivatives	Lupin alkaloids	NoSig
POS35	Pyridine	2.83	80.05	[M+H]+	80.0495	True	4.32634e+08	4.36193e+08	4.57656e+08	3.32896e+08	3.22329e+08	3.75705e+08	0.00552496	1.28669	0.36366	3.43643e+08	2.82647e+07	1.63186e+07	8.22499	4.42161e+08	1.35363e+07	7.81519e+06	3.06139	0.0190721	1.28377	1.28353	2.25767	C5H5N	Pyridines and derivatives	JUJWROOIHBZHMG-UHFFFAOYSA-N	N=1C=CC=CC1	C00747	1049	HMDB0000926	Organoheterocyclic compounds	Pyridines and derivatives	UP
NEG1287	Allopurinol	12.456	135.03	[M-H]-	135.031	True	1.40126e+08	1.07867e+08	1.2918e+08	1.30411e+08	1.11838e+08	1.1585e+08	0.595022	1.05327	0.0748701	1.19366e+08	9.77312e+06	5.64251e+06	8.18751	1.25724e+08	1.64044e+07	9.47109e+06	13.0479	0.723536	0.379231	0.378869	0.225467	C5H4N4O	Pyrazolo[3,4-d]pyrimidines	OFCNXPDARWKPPY-UHFFFAOYSA-N	C1=NNC2=C1C(=NC=N2)O	---	135401907	HMDB0014581	Organoheterocyclic compounds	Pyrazolopyrimidines	NoSig
POS3319	TFMPP	7.63	231.113	[M+H]+	231.11	True	1.44523e+07	1.21498e+07	1.36683e+07	9.10414e+07	8.77425e+07	9.14463e+07	5.82455e-07	0.149023	-2.74639	9.00767e+07	2.0316e+06	1.17295e+06	2.25541	1.34235e+07	1.17064e+06	675868	8.72081	0.00010168	1.3665	1.36653	6.23474	C11H13F3N2	Phenylpiperazines	KKIMDKMETPPURN-UHFFFAOYSA-N	FC(F)(F)C1=CC(=CC=C1)N1CCNCC1	---	---	HMDB0244703	Organoheterocyclic compounds	Diazinanes	DOWN
NEG1174	Ethylmalonate	13.389	131.035	[M-H]-	131.035	True	2.06665e+08	4.46248e+08	5.44731e+08	8.07779e+08	4.02975e+08	3.2877e+08	0.560088	0.777931	-0.362286	5.13175e+08	2.57818e+08	1.48851e+08	50.2399	3.99215e+08	1.73871e+08	1.00385e+08	43.5533	0.698396	0.413726	0.413635	0.251744	C5H8O4	Branched fatty acids	UKFXDFUAPNAMPJ-UHFFFAOYSA-N	CCC(C(=O)O)C(=O)O	---	11756	HMDB0000622	Lipids and lipid-like molecules	Fatty Acyls	NoSig
NEG8638	3Beta-Hydroxy-23,24-Bisnorchol-5-Enic Acid	12.618	345.243	[M-H]-	345.244	True	1.21764e+07	1.24833e+07	1.35541e+07	4.10369e+07	4.14956e+07	4.30236e+07	2.38083e-06	0.304356	-1.71617	4.1852e+07	1.04023e+06	600578	2.4855	1.27379e+07	723270	417580	5.67809	0.000210352	1.36564	1.36566	5.62327	C22H34O3	Hydroxy bile acids, alcohols and derivatives	NPBNRBWMDNZEBN-YTEKVJICSA-N	O=C(O)C(C)C1CCC2C3CC=C4CC(O)CCC4(C)C3CCC12C	---	6728949	---	Lipids and lipid-like molecules	Steroids and steroid derivatives	DOWN
NEG9123	Resolvin D5	11.86	359.223	[M-H]-	359.223	True	3.49104e+06	4.04636e+06	3.0619e+06	2.50937e+07	2.62277e+07	2.14275e+07	0.000149622	0.145697	-2.77896	2.42496e+07	2.5089e+06	1.44851e+06	10.3461	3.5331e+06	493575	284966	13.97	0.00164719	1.35381	1.3537	3.825	C22H32O4	Very long-chain fatty acids	JBRPFYYLEQERPG-XTIXYJHRSA-N	C(C(O)=O)CC/C=C\[C@@H](/C=C/C=C\C\C=C/C=C/[C@H](C/C=C\CC)O)O	---	16061139	HMDB0004038	Lipids and lipid-like molecules	Fatty Acyls	DOWN
POS1129	Camphene	14.87	137.132	[M+H]+	137.132	True	7.19641e+07	1.34738e+08	6.91645e+07	1.13924e+08	1.25917e+08	5.36435e+07	0.858777	0.93997	-0.0893129	9.7828e+07	3.87319e+07	2.23619e+07	39.5918	9.19554e+07	3.7077e+07	2.14064e+07	40.3206	0.919742	0.129825	0.129121	0.0661195	C10H16	Bicyclic monoterpenoids	CRPUJAZIXJMDBK-UHFFFAOYSA-N	CC1(C)C2CCC(C2)C1=C	C06076	---	HMDB0059839	Lipids and lipid-like molecules	Prenol lipids	NoSig
POS22786	PC(18:1/18:2)	11.646	784.584	[M+H]+	784.585	True	1.35557e+08	9.17079e+07	8.76692e+07	7.33395e+07	2.09884e+08	1.16787e+08	0.546463	0.787315	-0.344987	1.33337e+08	6.97603e+07	4.02761e+07	52.3188	1.04978e+08	2.65593e+07	1.5334e+07	25.2999	0.684391	0.427865	0.427353	0.262439	C44H82NO8P	Phosphatidylcholines	YBNAKFLXDDROCX-YGRWKTHCSA-N	CCCCCC\C=C/CCCCCCCCCC(=O)OC[C@]([H])(COP([O-])(=O)OCC[N+](C)(C)C)OC(=O)CCCCCCC\C=C/C\C=C/CCCCC	---	53478723	HMDB0008072	Lipids and lipid-like molecules	Glycerophospholipids	NoSig
NEG5238	GlcNAc	0.977	256.059	[M+Cl]-	256.059	True	9.32204e+07	1.02506e+08	1.18587e+08	9.56365e+07	1.22477e+08	1.25884e+08	0.459412	0.91371	-0.130191	1.14666e+08	1.65676e+07	9.56528e+06	14.4486	1.04771e+08	1.28342e+07	7.40985e+06	12.2498	0.606097	0.517562	0.517502	0.337798	C8H15NO6	Aminosaccharides	OVRNDRQMDRJTHS-RTRLPJTCSA-N	OC(=NC1C(O)OC(CO)C(O)C1O)C	C00140	899	HMDB0000215	Organic oxygen compounds	Organooxygen compounds	NoSig
NEG761	Maleic acid	2.535	115.002	[M-H]-	115.004	True	5.88007e+07	1.33935e+08	1.54325e+08	1.54888e+06	2.34065e+07	1.3836e+08	0.29946	2.12509	1.08753	5.44384e+07	7.34953e+07	4.24325e+07	135.006	1.15687e+08	5.03087e+07	2.90457e+07	43.487	0.444102	0.699997	0.699666	0.523661	C4H4O4	Dicarboxylic acids and derivatives	VZCYOOQTPOCHFL-UPHRSURJSA-N	O=C(O)C=CC(=O)O	C01384	444266	HMDB0000176	Organic acids and derivatives	Carboxylic acids and derivatives	NoSig
NEG6262	Brazilein	0.984	283.06	[M-H]-	283.061	True	3.50709e+07	3.51048e+07	3.39181e+07	6.63408e+07	5.96999e+07	6.49234e+07	0.000147669	0.545096	-0.875417	6.36547e+07	3.4975e+06	2.01928e+06	5.49449	3.46979e+07	675535	390020	1.9469	0.00164719	1.35369	1.35379	3.83071	C16H12O5	Indanes	PGERTGWKXFAEFR-UHFFFAOYSA-N	O=C1C=CC=2C(OCC3(O)C2C=4C=C(O)C(O)=CC4C3)=C1	---	6453902	---	Benzenoids	Indanes	DOWN
POS1436	5-Butyl-2-methylpyridine	13.135	150.127	[M+H]+	150.128	True	4.04599e+07	6.10477e+07	8.66691e+07	2.77812e+07	7.33753e+07	4.36109e+07	0.486631	1.29986	0.378351	4.82558e+07	2.31492e+07	1.33652e+07	47.9719	6.27256e+07	2.31502e+07	1.33658e+07	36.9071	0.631651	0.48832	0.488801	0.3128	C10H15N	Pyridines and derivatives	GSYSNSTWMPZEQK-UHFFFAOYSA-N	CCCCC1=CN=C(C)C=C1	---	69704	HMDB0246758	Organoheterocyclic compounds	Pyridines and derivatives	NoSig
NEG2081	p-Coumaric acid	8.672	163.039	[M-H]-	163.04	True	5.62478e+07	5.37676e+07	5.28013e+07	2.92794e+07	2.19248e+07	2.98428e+07	0.000581195	2.00892	1.00642	2.70157e+07	4.41783e+06	2.55063e+06	16.3528	5.42722e+07	1.77779e+06	1.02641e+06	3.27569	0.00369907	1.34054	1.34038	3.23568	C9H8O3	Cinnamic acids and derivatives	NGSWKAQJJWESNS-ZZXKWVIFSA-N	OC(=O)\C=C/C1=CC=C(O)C=C1	C00811	637542	HMDB0002035	Phenylpropanoids and polyketides	Cinnamic acids and derivatives	UP
POS242	Phenol	6.913	95.0495	[M+H]+	95.0492	True	2.01342e+08	1.87041e+08	2.06236e+08	1.63606e+08	2.08212e+08	1.71763e+08	0.316487	1.09389	0.129469	1.81194e+08	2.37515e+07	1.37129e+07	13.1083	1.98206e+08	9.97423e+06	5.75862e+06	5.03225	0.463318	0.678346	0.678857	0.499644	C6H6O	Aralkylamines	ISWSIDIOOBJBQZ-UHFFFAOYSA-N	c1ccc(cc1)O	C00146	996	HMDB0000228	Benzenoids	Phenols	NoSig
NEG1986	N-Acetylthreonine	2.706	160.061	[M-H]-	160.062	True	1.11742e+07	3.34277e+07	1.09702e+07	1.33073e+07	8.24364e+06	1.29379e+07	0.409038	1.61131	0.68823	1.14963e+07	2.82293e+06	1.62982e+06	24.5552	1.8524e+07	1.29074e+07	7.45207e+06	69.6789	0.557741	0.572028	0.572095	0.388236	C6H11NO4	Amino acids and derivatives	PEDXUVCGOLSNLQ-WUJLRWPWSA-N	O=C(O)C(N=C(O)C)C(O)C	---	152204	HMDB0062557	Organic acids and derivatives	Carboxylic acids and derivatives	NoSig
POS3628	N-Lauroylethanolamine	9.737	244.227	[M+H]+	244.227	True	2.60142e+07	2.47967e+07	2.94112e+07	2.38685e+07	2.70696e+07	2.39946e+07	0.366398	1.07059	0.0984038	2.49776e+07	1.81284e+06	1.04664e+06	7.25788	2.67407e+07	2.39146e+06	1.38071e+06	8.94314	0.518768	0.619738	0.620092	0.436047	C14H29NO2	Carboximidic acids	QZXSMBBFBXPQHI-UHFFFAOYSA-N	CCCCCCCCCCCC(=O)NCCO	---	8899	---	Organic acids and derivatives	Carboximidic acids and derivatives	NoSig
POS309	4-Hydroxymethylpyrazole	13.265	99.056	[M+H]+	99.0553	True	3.81569e+08	2.9131e+08	2.60879e+08	3.30318e+08	7.47154e+08	5.1705e+08	0.155058	0.585603	-0.772004	5.31508e+08	2.08794e+08	1.20547e+08	39.2833	3.11253e+08	6.27675e+07	3.62389e+07	20.1661	0.272479	0.900731	0.900361	0.809507	C4H6N2O	Azoles	JRMKJOOJKCAEJK-UHFFFAOYSA-N	OCC1=CNN=C1	---	3015210	HMDB0060768	Organoheterocyclic compounds	Azoles	NoSig
POS2101	Rimantadine	10.182	180.175	[M+H]+	180.175	True	1.72888e+07	2.14784e+07	2.30345e+07	2.44662e+07	2.77692e+07	2.89753e+07	0.0413374	0.761004	-0.394023	2.70702e+07	2.33441e+06	1.34777e+06	8.62355	2.06006e+07	2.97176e+06	1.71575e+06	14.4256	0.092348	1.13367	1.13363	1.38366	C12H21N	Primary amines	UBCHPRBFMUDMNC-UHFFFAOYSA-N	NC(C)C13CC2CC(CC(C1)C2)C3	C07236	5071	HMDB0014621	Organic nitrogen compounds	Organonitrogen compounds	DOWN
POS2	Hydroxyacetone	6.594	75.0447	[M+NH4]+	75.0446	True	9.98251e+07	6.81728e+07	7.44993e+07	1.03606e+08	7.29397e+07	6.51871e+07	0.987424	1.00316	0.00455708	8.05775e+07	2.03162e+07	1.17296e+07	25.2132	8.08324e+07	1.67496e+07	9.67037e+06	20.7214	0.996634	0.0115826	0.0114646	0.00549641	C3H6O2	Organooxygen compounds	XLSMFKSTNGKWQX-UHFFFAOYSA-N	CC(=O)CO	C05235	8299	HMDB0006961	Organic oxygen compounds	Organooxygen compounds	NoSig
NEG732	Dihydrouracil	6.918	113.034	[M-H]-	113.036	True	2.11663e+07	3.21489e+07	4.42883e+07	2.89858e+07	1.78387e+07	2.53129e+07	0.317529	1.35302	0.436185	2.40458e+07	5.68054e+06	3.27966e+06	23.6238	3.25345e+07	1.15658e+07	6.67753e+06	35.5494	0.463584	0.677766	0.677597	0.498217	C4H6N2O2	Pyrimidones	OIVLITBTBDPEFK-UHFFFAOYSA-N	C1CNC(=O)NC1=O	C00429	649	HMDB0000076	Organoheterocyclic compounds	Diazines	NoSig
NEG6937	N-Acetylgalactosamine 4-sulfate	1.001	300.04	[M-H]-	300.039	True	6.87454e+07	6.43212e+07	7.4129e+07	3.47507e+07	4.31219e+07	3.32152e+07	0.0015657	1.86515	0.899294	3.70292e+07	5.33197e+06	3.07842e+06	14.3994	6.90652e+07	4.91171e+06	2.83578e+06	7.11169	0.00738721	1.32283	1.32296	2.80529	C8H15NO9S	Monosaccharides	RKFMAQNDSSSRTH-OSMVPFSASA-N	CC(=O)N[C@@H](C=O)[C@H]([C@H]([C@@H](CO)O)OS(=O)(=O)O)O	C16265	---	HMDB0000781	Organic oxygen compounds	Organooxygen compounds	UP
POS510	3,4-Diaminopyridine	13.391	110.072	[M+CH3OH+H]+	110.071	True	1.07176e+08	2.00016e+08	4.8865e+08	1.69556e+08	5.62341e+08	4.25838e+08	0.499414	0.687412	-0.540753	3.85912e+08	1.99413e+08	1.15131e+08	51.6733	2.6528e+08	1.98935e+08	1.14855e+08	74.9906	0.64197	0.475783	0.475494	0.301539	C5H7N3	Pyridines and derivatives	OYTKINVCDFNREN-UHFFFAOYSA-N	NC1=CNC=CC1=N	---	5918	HMDB0246022	Organoheterocyclic compounds	Pyridines and derivatives	NoSig
NEG9714	5-[5-(acetyloxymethyl)-1,2,4a-trimethyl-7-oxo-3,4,8,8a-tetrahydro-2H-naphthalen-1-yl]-3-methylpentanoic acid	10.827	377.233	[M-H]-	377.233	True	1.54707e+07	1.29482e+07	1.54275e+07	2.00859e+07	1.79849e+07	2.17651e+07	0.0179025	0.732777	-0.448554	1.99453e+07	1.89402e+06	1.09351e+06	9.49606	1.46155e+07	1.44409e+06	833746	9.88057	0.0488384	1.21477	1.21515	1.74709	C22H34O5	Colensane and clerodane diterpenoids	OLDFOHABNQZMKB-UHFFFAOYSA-N	O=C(OCC1=CC(=O)CC2C1(C)CCC(C)C2(C)CCC(C)CC(=O)O)C	---	44715828	---	Lipids and lipid-like molecules	Prenol lipids	DOWN
POS14497	Bilirubin	9.864	585.268	[M+H]+	585.271	True	1.32513e+07	1.21718e+07	1.83149e+07	66888.2	4.94581e+06	6.77457e+06	0.0180717	3.71062	1.89166	3.92909e+06	3.4675e+06	2.00196e+06	88.2519	1.45794e+07	3.2798e+06	1.89359e+06	22.4962	0.0490748	1.21447	1.21442	1.743	C33H36N4O6	Bilirubins	BPYKTIZUTYGOLE-IFADSCNNSA-N	O=C(O)CCC1=C(NC(C=C2N=C(O)C(=C2C=C)C)=C1C)CC=3NC(C=C4N=C(O)C(C=C)=C4C)=C(C3CCC(=O)O)C	C00486	5280352	HMDB0000054	Organoheterocyclic compounds	Tetrapyrroles and derivatives	UP
NEG6470	Ophthalmic acid	3.006	288.12	[M-H]-	288.12	True	3.11197e+07	3.52947e+07	3.64739e+07	7.81568e+06	8.69417e+06	1.96145e+07	0.0057258	2.84817	1.51004	1.20415e+07	6.57314e+06	3.795e+06	54.5876	3.42961e+07	2.8133e+06	1.62426e+06	8.20298	0.0197097	1.28219	1.28201	2.24216	C11H19N3O6	Peptides	JCMUOFQHZLPHQP-BQBZGAKWSA-N	CC[C@H](N=C(O)CC[C@H](N)C(=O)O)C(O)=NCC(=O)O	C21016	---	HMDB0005765	Organic acids and derivatives	Carboxylic acids and derivatives	UP
POS2353	N-Acetylserine	1.35	192.024	[M-H+2Na]+	192.024	True	2.6136e+08	2.8374e+08	2.93764e+08	3.16323e+08	3.19224e+08	3.02325e+08	0.0389408	0.894434	-0.160953	3.12624e+08	9.03645e+06	5.2172e+06	2.89052	2.79621e+08	1.65901e+07	9.57831e+06	5.93307	0.0887793	1.14099	1.14071	1.40959	C5H9NO4	Amino acids and derivatives	JJIHLJJYMXLCOY-BYPYZUCNSA-N	CC(O)=NC(CO)C(=O)O	---	352294	HMDB0002931	Organic acids and derivatives	Carboxylic acids and derivatives	DOWN
POS1024	Isoleucine	6.418	132.102	[M+H]+	132.102	True	1.87767e+08	9.03481e+07	1.60672e+08	9.3869e+07	1.57647e+08	1.42926e+08	0.693267	1.11243	0.153709	1.31481e+08	3.33939e+07	1.928e+07	25.3983	1.46262e+08	5.02826e+07	2.90307e+07	34.3783	0.794326	0.283737	0.283685	0.1591	C6H13NO2	Amino acids and derivatives	AGPKZVBTJJNPAG-WHFBIAKZSA-N	CCC(C)C(N)C(=O)O	C00407	6306	HMDB0000172	Organic acids and derivatives	Carboxylic acids and derivatives	NoSig
POS1132	Myrcene	4.124	137.132	[M+H]+	137.132	True	1.47382e+08	1.88481e+08	1.41878e+08	1.97127e+08	4.34686e+08	1.57944e+08	0.301289	0.604921	-0.725182	2.63253e+08	1.49753e+08	8.64599e+07	56.8856	1.59247e+08	2.54666e+07	1.47031e+07	15.9919	0.445733	0.698146	0.69741	0.521017	C10H16	Acyclic monoterpenoids	UAHWPYUMFXYFJY-UHFFFAOYSA-N	C=CC(=C)CCC=C(C)C	C06074	31253	HMDB0038169	Lipids and lipid-like molecules	Prenol lipids	NoSig
NEG6681	Myrsinone	11.941	293.175	[M-H2O-H]-	293.175	True	4.92679e+07	3.96807e+07	3.4117e+07	2.48933e+07	2.60583e+07	2.71617e+07	0.0285717	1.57547	0.655786	2.60378e+07	1.13435e+06	654917	4.35655	4.10219e+07	7.66397e+06	4.4248e+06	18.6827	0.069551	1.17415	1.17405	1.54406	C17H26O4	Prenol lipids	JPFXYNDBKFIYLX-UHFFFAOYSA-N	CCCCCCCCCCCC1=CC(=O)C(O)=C(O)C1=O	---	137177207	HMDB0040646	Lipids and lipid-like molecules	Prenol lipids	UP
NEG1257	4-Hydroxybenzotriazole	13.381	134.035	[M-H]-	134.036	True	1.45129e+08	5.19741e+08	1.85943e+08	2.58044e+08	1.9948e+08	4.41162e+08	0.914259	0.946731	-0.0789737	2.99562e+08	1.26077e+08	7.27904e+07	42.087	2.83604e+08	2.05516e+08	1.18655e+08	72.4658	0.958168	0.0780553	0.078246	0.0389308	C6H5N3O	Benzotriazoles	JMTMSDXUXJISAY-UHFFFAOYSA-N	C1=CC2=NNN=C2C(=C1)O	---	135399369	---	Organoheterocyclic compounds	Benzotriazoles	NoSig
POS1084	Adenine	6.699	136.062	[M+H]+	136.062	True	1.81603e+08	1.81121e+08	1.93241e+08	1.417e+08	1.232e+08	1.49639e+08	0.00580445	1.34116	0.423485	1.3818e+08	1.35661e+07	7.83241e+06	9.81774	1.85322e+08	6.86264e+06	3.96215e+06	3.7031	0.0198685	1.28169	1.28142	2.23624	C5H5N5	6-aminopurines	GFFGJBXGBJISGV-UHFFFAOYSA-N	NC1=C2N=CNC2=NC=N1	C00147	190	HMDB0000034	Organoheterocyclic compounds	Imidazopyrimidines	UP
NEG1550	Adipic acid	12.017	145.051	[M-H]-	145.051	True	2.82642e+08	2.53102e+08	2.20183e+08	1.34802e+08	1.63679e+08	3.38407e+08	0.580732	1.18691	0.247206	2.12296e+08	1.10165e+08	6.36039e+07	51.8923	2.51976e+08	3.12449e+07	1.80393e+07	12.4	0.714657	0.393603	0.393023	0.236025	C6H10O4	Medium-chain fatty acids	WNLRTRBMVRJNCN-UHFFFAOYSA-N	O=C(O)CCCCC(=O)O	C06104	---	HMDB0000448	Lipids and lipid-like molecules	Fatty Acyls	NoSig
POS659	N-(3-Methylbutyl)acetamide	9.024	116.107	[M+CH3OH+H]+	116.108	True	3.70404e+10	3.8317e+10	3.91916e+10	3.7923e+10	4.10203e+10	3.71693e+10	0.715852	0.986533	-0.0195603	3.87042e+10	2.04092e+09	1.17833e+09	5.27313	3.8183e+10	1.08187e+09	6.24621e+08	2.83339	0.812985	0.26303	0.262241	0.145177	C6H13NO	Carboxylic acids and derivatives	GYLDXXLJMRTVSS-UHFFFAOYSA-N	CCCCNC(C)=O	---	61265	HMDB0031651	Organic acids and derivatives	Carboxylic acids and derivatives	NoSig
NEG4563	1-Carboxyethylphenylalanine	6.806	236.092	[M-H2O-H]-	236.092	True	7.1264e+06	6.08133e+06	5.7099e+06	1.26766e+07	1.44342e+07	1.52154e+07	0.000826108	0.446947	-1.16182	1.41088e+07	1.30031e+06	750734	9.21632	6.30588e+06	734460	424041	11.6472	0.00467363	1.33512	1.33517	3.08296	C12H15NO4	Carboxylic acids and derivatives	MSBSJGQKNVMMQB-SCZZXKLOSA-N	C[C@@H](N[C@@H](CC1=CC=CC=C1)C(O)=O)C(O)=O	---	127261991	HMDB0240628	Organic acids and derivatives	Carboxylic acids and derivatives	DOWN
POS5634	Dihydroxyoctadecadienoic acid	10.943	313.237	[M+H]+	313.237	True	2.00641e+07	2.05331e+07	2.12677e+07	6.32954e+07	5.31277e+07	5.76849e+07	0.000225909	0.355325	-1.49279	5.8036e+07	5.0929e+06	2.94039e+06	8.77542	2.06216e+07	606685	350270	2.94198	0.00206015	1.35049	1.35057	3.64607	C18H32O4	Lineolic acids and derivatives	YJNRBSIIJBOEIF-FZIQOSRTSA-N	O=C(O)C(O)=C(O)C=CCCCCCCCCCCCCC	---	---	---	Lipids and lipid-like molecules	Fatty Acyls	DOWN
POS1143	1,2,3,4,5,6-Hexahydro-7H-cyclopenta[b]pyridin-7-one	6.863	138.091	[M+CH3OH+H]+	138.092	True	2.26661e+07	1.91612e+07	2.40457e+07	2.58529e+07	2.7649e+07	2.88805e+07	0.0316991	0.7996	-0.322649	2.74608e+07	1.52256e+06	879048	5.54447	2.19577e+07	2.51813e+06	1.45385e+06	11.4681	0.0750703	1.16331	1.16347	1.49895	C8H11NO	Pyridines and derivatives	JOAMMKKZSZEDHD-UHFFFAOYSA-N	O=C1CCC2=C1NCCC2	---	6428973	HMDB0039657	Organoheterocyclic compounds	Pyridines and derivatives	DOWN
POS11982	Pro-CDCA	11.923	512.335	[M+Na]+	512.335	True	3.59738e+08	3.39696e+08	2.58356e+08	1.38932e+08	1.44954e+08	1.39106e+08	0.00456671	2.26432	1.17908	1.40998e+08	3.42765e+06	1.97896e+06	2.431	3.19263e+08	5.36906e+07	3.09983e+07	16.817	0.0163562	1.29121	1.29122	2.3404	C29H47NO5	ClassyFy Status	TVNLAWCTCXPKQY-AVINCHNBSA-N	C[C@H](CCC(N1C(C(O)=O)CCC1)=O)[C@H]2CC[C@@]3([H])[C@]4([H])[C@H](O)C[C@]5([H])C[C@H](O)CC[C@]5(C)[C@H]4CC[C@@]32C	---	163166904	---	---	---	UP
POS2446	4-Chlorohippuric acid	13.584	196.017	[M+H-H2O]+	196.016	True	5.64683e+08	3.31049e+08	2.91547e+08	6.06424e+08	4.42106e+08	2.26033e+08	0.844728	0.931519	-0.102343	4.24854e+08	1.90781e+08	1.10147e+08	44.905	3.9576e+08	1.47619e+08	8.52279e+07	37.3002	0.908734	0.142239	0.142055	0.0732831	C9H8ClNO3	Benzamides	COYZIYOEXGRBHQ-UHFFFAOYSA-N	O=C(O)CNC(=O)c1ccc(Cl)cc1	---	26009	---	Benzenoids	Benzene and substituted derivatives	NoSig
POS1350	L-beta-Homoleucine	7.101	146.118	[M+H]+	146.118	True	4.28811e+07	4.81829e+07	4.63909e+07	2.76926e+07	3.12872e+07	2.77538e+07	0.000990255	1.58479	0.664295	2.89112e+07	2.0579e+06	1.18813e+06	7.118	4.58183e+07	2.69686e+06	1.55703e+06	5.88599	0.00540702	1.33194	1.3321	3.00425	C7H15NO2	Amino acids and derivatives	MLYMSIKVLAPCAK-LURJTMIESA-N	CC(C)CC(CC(=O)O)N	---	2733735	---	Organic acids and derivatives	Carboxylic acids and derivatives	UP
POS191	Sarcosine	2.257	90.0555	[M+H]+	90.055	True	4.52522e+08	5.36279e+08	3.56478e+08	1.97991e+08	2.14887e+08	2.10811e+08	0.0099672	2.15697	1.10901	2.07896e+08	8.81659e+06	5.09026e+06	4.24086	4.48426e+08	8.99702e+07	5.19443e+07	20.0635	0.0306028	1.25428	1.25435	2.00143	C3H7NO2	Amino acids and derivatives	FSYKKLYZXJSNPZ-UHFFFAOYSA-N	O=C(O)CNC	C00213	1088	HMDB0000271	Organic acids and derivatives	Carboxylic acids and derivatives	UP
NEG2020	Sorbose	0.962	161.044	[M-H2O-H]-	161.045	True	2.67788e+07	37809526	3.43642e+07	2.70575e+07	5.54689e+07	3.09715e+07	0.635583	0.871845	-0.197857	3.78326e+07	1.53983e+07	8.89022e+06	40.7011	3.29842e+07	5.64337e+06	3.2582e+06	17.1093	0.753329	0.339916	0.339153	0.196828	C6H12O6	Monosaccharides	LKDRXBCSQODPBY-IANNHFEVSA-N	C1[C@@H]([C@H]([C@@H](C(O1)(CO)O)O)O)O	C00247	439192	HMDB0001266	Organic oxygen compounds	Organooxygen compounds	NoSig
POS4191	(1R,2R,4aS,8aS)-2-[(2R)-2-Hydroxybutyl]-1,3-dimethyl-1,2,4a,5,6,7,8,8a-octahydro-1-naphthalenecarboxylic acid	12.092	263.201	[M-H2O+H]+	263.2	True	1.24911e+08	1.08525e+08	1.11335e+08	9.77243e+07	1.09849e+08	1.09316e+08	0.221396	1.08799	0.12166	1.0563e+08	6.8515e+06	3.95571e+06	6.48633	1.14924e+08	8.76272e+06	5.05916e+06	7.62481	0.353193	0.801667	0.80159	0.65483	C17H28O3	Secondary alcohols	HIVVBTLNCFFLPO-LVNYTYFRSA-N	CC[C@@H](O)C[C@@H]1\C(=C/[C@@H]2CCCC[C@@H]2[C@@]1(C)C(O)=O)C	---	9795706	---	Organic oxygen compounds	Organooxygen compounds	NoSig
POS2419	Dimethyl phthalate	10.656	195.065	[M+H]+	195.065	True	4.51048e+07	5.0828e+07	4.8913e+07	4.92918e+07	5.12693e+07	5.33492e+07	0.214468	0.941106	-0.0875702	5.13034e+07	2.02892e+06	1.1714e+06	3.95474	4.8282e+07	2.91331e+06	1.682e+06	6.03394	0.344389	0.811288	0.811273	0.668637	C10H10O4	Benzoic acid esters	NIQCNGHVCWTJSM-UHFFFAOYSA-N	O=C(OC)C=1C=CC=CC1C(=O)OC	C11233	8554	HMDB0251388	Benzenoids	Benzene and substituted derivatives	NoSig
POS3694	Dezocine	1.338	246.181	[M+H]+	246.185	True	7.45e+07	8.67213e+07	6.42916e+07	4.73744e+07	5.07239e+07	3.1902e+07	0.0215676	1.73471	0.794694	4.33334e+07	1.00405e+07	5.79691e+06	23.1704	7.5171e+07	1.12299e+07	6.48358e+06	14.9391	0.056436	1.19967	1.19997	1.6662	C16H23NO	Tetralins	VTMVHDZWSFQSQP-VBNZEHGJSA-N	[H][C@@]12CC3=CC=C(O)C=C3[C@@](C)(CCCCC1)[C@H]2N	C08010	3033053	HMDB0015340	Benzenoids	Tetralins	UP
NEG147	2-hydroxyacrylic Acid	1.035	87.0071	[M-H]-	87.0082	True	1.43693e+08	1.83447e+08	1.51137e+08	9.8609e+07	8.48602e+07	1.01967e+08	0.00838973	1.6756	0.74468	9.51453e+07	9.064e+06	5.23311e+06	9.52648	1.59426e+08	2.11337e+07	1.22016e+07	13.2561	0.0263554	1.26384	1.2638	2.07625	C3H4O3	Carboxylic acids and derivatives	FEWFXBUNENSNBQ-UHFFFAOYSA-N	OC(=C)C(O)=O	---	37873	HMDB0062676	Organic acids and derivatives	Carboxylic acids and derivatives	UP
POS1140	6-Methyl-2-pyridinecarboxylic acid	1.462	138.053	[M+H]+	138.055	True	3.83307e+08	4.48952e+08	5.15497e+08	3.03582e+08	3.76879e+08	4.26501e+08	0.199354	1.21753	0.283954	3.68987e+08	6.18384e+07	3.57024e+07	16.7589	4.49252e+08	6.60954e+07	3.81602e+07	14.7123	0.326075	0.832914	0.83285	0.700374	C7H7NO2	Pyridines and derivatives	LTUUGSGSUZRPRV-UHFFFAOYSA-N	CC1=CC=CC(=N1)C(O)=O	---	70282	HMDB0247665	Organoheterocyclic compounds	Pyridines and derivatives	NoSig
POS2632	Leucylalanine	6.773	203.139	[M+H]+	203.139	True	4.87522e+07	5.28984e+07	4.73762e+07	6.72294e+06	1.00386e+07	7.64594e+06	2.76442e-05	6.10578	2.61018	8.13583e+06	1.71127e+06	987999	21.0337	4.96756e+07	2.87458e+06	1.65964e+06	5.78669	0.000614203	1.36146	1.36151	4.5584	C9H18N2O3	Peptides	HSQGMTRYSIHDAC-BQBZGAKWSA-N	C[C@@H](C(=O)O)NC(=O)[C@H](CC(C)C)N	---	81721;6992295	HMDB0028922	Organic acids and derivatives	Carboxylic acids and derivatives	UP
POS12851	1-acyl-PAF	12.205	538.351	[M+H]+	538.35	True	6.41017e+07	8.07065e+07	6.53941e+07	1.90317e+07	2.47411e+07	1.55912e+07	0.00108333	3.54091	1.82412	1.9788e+07	4.6216e+06	2.66828e+06	23.3556	7.00674e+07	9.23635e+06	5.33261e+06	13.1821	0.0057558	1.33033	1.33047	2.96524	C26H52NO8P	Glycerophospholipids	XPAXRSJGGFVTFM-UHFFFAOYSA-N	CCCCCCCCCCCCCCCC(=O)OCC(COP([O-])(=O)OCC[N+](C)(C)C)OC(C)=O	---	1363	HMDB0243815	Lipids and lipid-like molecules	Glycerophospholipids	UP
POS6564	N-[2-(5-methoxy-2-methylindol-3-yl)ethyl](4-methylphenyl)carboxamide	8.106	345.151	[M+Na]+	345.157	True	1.66526e+07	1.69132e+07	1.78113e+07	1.39269e+07	1.70853e+07	1.60357e+07	0.219749	1.09202	0.126995	1.56826e+07	1.60857e+06	928706	10.257	1.71257e+07	607914	350979	3.54972	0.351484	0.803578	0.803881	0.658072	C20H22N2O2	3-alkylindoles	OFQGMJSMIPGNIW-UHFFFAOYSA-N	COc1ccc2[nH]c(C)c(CCNC(=O)c3ccc(C)cc3)c2c1	---	729218	---	Organoheterocyclic compounds	Indoles and derivatives	NoSig
POS4812	1-Ethyl-5-(4-hydroxyphenyl)-3-methyl-6,7-dihydropyrazolo(4,3-E)(1,4)diazepin-8(1H)-one	8.717	285.131	[M+H]+	285.135	True	8.66941e+06	1.05834e+07	1.02688e+07	5.14685e+07	4.74673e+07	5.82854e+07	0.00018761	0.187771	-2.41295	5.24071e+07	5.4698e+06	3.15799e+06	10.4371	9.84053e+06	1.02635e+06	592561	10.4298	0.00184887	1.35195	1.35206	3.72674	C15H16N4O2	Carboxylic acid amides	BEOZJBLIRPRMJM-UHFFFAOYSA-N	CCN1N=C(C)C2=C1C(=O)NCC(=N2)C1=CC=C(O)C=C1	---	135418174	---	Organic acids and derivatives	Carboxylic acids and derivatives	DOWN
POS10906	LPE(18:2)	12.131	478.293	[M+H]+	478.293	True	8.88902e+07	1.07283e+08	9.27204e+07	1.44132e+08	1.45872e+08	1.44717e+08	0.000986823	0.664549	-0.589553	1.44907e+08	885335	511148	0.610967	9.62978e+07	9.70414e+06	5.60269e+06	10.0772	0.00540702	1.33223	1.33216	3.00576	C23H44NO7P	Lysophosphatidylethanolamines	DBHKHNGBVGWQJE-USWSLJGRSA-N	O=C(OCC(O)COP(=O)(O)OCCN)CCCCCCCC=CCC=CCCCCC	---	---	HMDB0011507	Lipids and lipid-like molecules	Glycerophospholipids	DOWN
NEG13817	LPC(17:0)	11.688	568.362	[M-H]-	568.362	True	1063800	1.17295e+08	8.14398e+07	6.37712e+06	2.14693e+07	9.07468e+07	0.563851	1.68474	0.752527	3.95311e+07	4.49914e+07	2.59758e+07	113.813	6.65996e+07	5.95198e+07	3.43638e+07	89.3696	0.701656	0.410003	0.409863	0.248836	C25H52NO7P	Lysophosphatidylcholines	SRRQPVVYXBTRQK-YXKUJCFLSA-N	[H]C(O)(C([H])([H])OC(=O)CCCCCCCCCCCCCCCC)C([H])([H])OP(=O)([O-])OCC[N+](C)(C)C	---	146171620	HMDB0012108	Lipids and lipid-like molecules	Glycerophospholipids	NoSig
POS11661	3-{[1-(tert-butyl)(1,2,3,4-tetraazol-5-yl)][4-benzylpiperazinyl]methyl}-6-etho xyhydroquinolin-2-one	12.129	502.293	[M+H]+	502.292	True	1.61614e+08	2.60116e+08	2.27107e+08	2.25384e+08	2.21744e+08	2.14688e+08	0.889058	0.980387	-0.0285765	2.20605e+08	5.43814e+06	3.13971e+06	2.4651	2.16279e+08	5.0136e+07	2.8946e+07	23.1812	0.940631	0.101622	0.101319	0.0510701	C28H35N7O2	Hydroquinolones	NEHSMRMOOSXSBN-UHFFFAOYSA-N	CCOc1ccc2[nH]c(=O)c(C(c3nnnn3C(C)(C)C)N3CCN(Cc4ccccc4)CC3)cc2c1	---	3150430	---	Organoheterocyclic compounds	Quinolines and derivatives	NoSig
NEG11223	4-Bromo-N-[2-(4-Fluoro-2,7-Dimethyl-1H-Indol-3-Yl)Ethyl]Benzamide	0.903	433.057	[M-H]-	433.057	True	1.23075e+07	1.22716e+07	1.56921e+07	6.78619e+06	6.95942e+06	7.15386e+06	0.00477745	1.9269	0.946283	6.96649e+06	183938	106196	2.64032	1.34237e+07	1.96453e+06	1.13422e+06	14.6347	0.0168673	1.28949	1.28947	2.3208	C19H18BrFN2O	3-alkylindoles	HQCPQPWREIXMHM-UHFFFAOYSA-N	Cc1[nH]c2c(C)ccc(F)c2c1CCNC(=O)c1ccc(Br)cc1	---	1045098	---	Organoheterocyclic compounds	Indoles and derivatives	UP
NEG15750	PC(16:0/18:2)	13.517	802.561	[M-H]-	802.56	True	3.75869e+07	4.77431e+07	3.33393e+07	9.76198e+06	1.15762e+07	1.62813e+07	0.0045191	3.15447	1.6574	1.25398e+07	3.36478e+06	1.94266e+06	26.8328	3.95564e+07	7.40109e+06	4.27302e+06	18.7102	0.016313	1.29163	1.29163	2.34495	C42H80NO8P	Phosphatidylcholines	JLPULHDHAOZNQI-AKMCNLDWSA-N	[H][C@@](COC(=O)CCCCCCCCCCCCCCC)(COP([O-])(=O)OCC[N+](C)(C)C)OC(=O)CCCCCCC\C=C/C\C=C/CCCCC	---	5287971	HMDB0007973	Lipids and lipid-like molecules	Glycerophospholipids	UP
POS10426	2-[[3,4-dihydroxy-4-(hydroxymethyl)oxolan-2-yl]oxymethyl]-6-[(1,3,3-trimethyl-2-oxabicyclo[2.2.2]octan-5-yl)oxy]oxane-3,4,5-triol	10.196	465.233	[M+H]+	465.233	True	2.84363e+07	2.89027e+07	3.34506e+07	3.04343e+07	2.87539e+07	3.17012e+07	0.986226	0.998901	-0.00158645	3.02965e+07	1.4785e+06	853613	4.88011	3.02632e+07	2.77018e+06	1.59936e+06	9.15363	0.996634	0.0121482	0.0125566	0.00602356	C21H36O11	Glycosyl compounds	MPYSZNHNOUOLSB-UHFFFAOYSA-N	OCC1(O)COC(OCC2OC(OC3CC4(OC(C)(C)C3CC4)C)C(O)C(O)C2O)C1O	---	57509351	---	Organic oxygen compounds	Organooxygen compounds	NoSig
POS3524	Isolongifolol	10.629	240.232	[M+H-H2O]+	240.232	True	1.50174e+07	1.81447e+07	1.54075e+07	2.83866e+07	3.08382e+07	3.19393e+07	0.000591822	0.53277	-0.908415	3.03881e+07	1.81862e+06	1.04998e+06	5.98464	1.61899e+07	1.70413e+06	983882	10.5259	0.00371159	1.34014	1.34013	3.22781	C15H26O	Sesquiterpenoids	VZJHQHUOVIDRCF-BIGJJFBESA-N	OCC1C2CCC3C2C(C)(C)CCCC13C	---	572865	---	Lipids and lipid-like molecules	Prenol lipids	DOWN
POS810	Histidinol	13.209	124.087	[M+H]+	124.087	True	7.65589e+09	4.82731e+09	5.73249e+09	9.85284e+09	1.64386e+10	2.06233e+10	0.0420083	0.388272	-1.36486	1.56383e+10	5.42967e+09	3.13482e+09	34.7204	6.0719e+09	1.44451e+09	8.33987e+08	23.7901	0.0936753	1.13153	1.13168	1.37667	C6H11N3O	Aralkylamines	ZQISRDCJNBUVMM-YFKPBYRVSA-N	C1=C(NC=N1)C[C@@H](CO)N	C00860	165271	HMDB0003431	Organic nitrogen compounds	Organonitrogen compounds	DOWN
POS1838	1-(carboxypropyl)urea	1.304	169.059	[M+Na]+	169.058	True	1.02932e+09	1.07527e+09	1.18639e+09	5.93542e+08	6.5679e+08	6.49462e+08	0.000794449	1.73228	0.792675	6.33265e+08	3.45954e+07	1.99737e+07	5.46303	1.09699e+09	8.07579e+07	4.66256e+07	7.36174	0.00455782	1.33576	1.33579	3.09993	C5H10N2O3	Amino acids and derivatives	QYTWIMMLQKHPGL-UHFFFAOYSA-N	O=C(N)NCCCC(=O)O	---	1571307	---	Organic acids and derivatives	Carboxylic acids and derivatives	UP
POS2225	Phosphoserine	1.346	186.016	[M+H]+	186.016	True	9.75417e+07	1.04162e+08	1.09408e+08	6.96214e+07	6.88411e+07	7.52332e+07	0.00122841	1.45586	0.541875	7.12319e+07	3.48712e+06	2.01329e+06	4.89545	1.03704e+08	5.94646e+06	3.43319e+06	5.73408	0.00620296	1.32812	1.32806	2.91066	C3H8NO6P	Amino acids and derivatives	BZQFBWGGLXLEPQ-REOHCLBHSA-N	O=C(O)C(N)COP(=O)(O)O	C01005	68841	HMDB0000272	Organic acids and derivatives	Carboxylic acids and derivatives	UP
POS1960	Orthanilic acid	7.929	174.022	[M+H]+	174.022	True	5.16902e+08	5.19536e+08	5.34239e+08	3.38855e+07	3.54509e+07	3.66719e+07	9.33516e-08	14.8165	3.88914	3.53361e+07	1.39671e+06	806391	3.95265	5.23559e+08	9.34247e+06	5.39388e+06	1.78442	3.80252e-05	1.36704	1.36704	7.02988	C6H7NO3S	Benzenesulfonic acids and derivatives	ZMCHBSMFKQYNKA-UHFFFAOYSA-N	O=S(=O)(O)C=1C=CC=CC1N	C06333	---	HMDB0304940	Benzenoids	Benzene and substituted derivatives	UP
NEG2087	1,5-Anhydrosorbitol	12.022	163.061	[M-H2O-H]-	163.061	True	1.522e+08	2.18996e+08	1.16736e+08	1.51434e+08	8.87526e+07	1.76405e+08	0.581714	1.17125	0.228049	1.38864e+08	4.51579e+07	2.60719e+07	32.5196	1.62644e+08	5.19238e+07	2.99782e+07	31.9248	0.715146	0.392443	0.392047	0.23529	C6H12O5	Monosaccharides	MPCAJMNYNOGXPB-SLPGGIOYSA-N	OCC1OCC(O)C(O)C1O	C07326	64960	HMDB0002712	Organic oxygen compounds	Organooxygen compounds	NoSig
POS2486	N-Acetylaspartic acid	2.052	198.037	[M+Na]+	198.037	True	2.02731e+08	2.6519e+08	2.88004e+08	1.01444e+08	4.53925e+07	1.16339e+08	0.00794955	2.87233	1.52222	8.7725e+07	3.74098e+07	2.15986e+07	42.6444	2.51975e+08	4.41456e+07	2.54875e+07	17.5198	0.0252978	1.26675	1.26659	2.09966	C6H9NO5	Amino acids and derivatives	OTCCIMWXFLJLIA-BYPYZUCNSA-N	CC(=O)N[C@@H](CC(O)=O)C(O)=O	C01042	---	HMDB0000812	Organic acids and derivatives	Carboxylic acids and derivatives	UP
POS359	Valeramide	11.318	102.092	[M+H]+	102.091	True	5.66725e+09	6.07268e+09	6.42189e+09	5.46513e+09	6.38631e+09	6.35314e+09	0.971281	0.99765	-0.00339379	6.0682e+09	5.22532e+08	3.01684e+08	8.611	6.05394e+09	3.7767e+08	2.18048e+08	6.23842	0.989913	0.0263697	0.0261832	0.0126552	C5H11NO	Fatty amides	IPWFJLQDVFKJDU-UHFFFAOYSA-N	N=C(O)CCCC	C01842	12298	HMDB0256275	Lipids and lipid-like molecules	Fatty Acyls	NoSig
POS6166	1,3-Benzenediol, 5-(8Z,11Z)-8,11,14-pentadecatrienyl-	12.055	332.258	[M+H]+	332.258	True	3309.03	1.70582e+07	1.84574e+07	3309.03	1.43855e+07	1.35973e+07	0.75611	1.26916	0.343876	9.32871e+06	8.08564e+06	4.66825e+06	86.6748	1.18396e+07	1.02744e+07	5.93193e+06	86.7797	0.847871	0.224085	0.22434	0.121415	C21H30O2	Resorcinols	OOXBEOHCOCMKAC-UTOQUPLUSA-N	OC=1C=C(O)C=C(C1)CCCCCCCC=CCC=CCC=C	---	13259919	---	Benzenoids	Phenols	NoSig
NEG2341	1-Aminocyclopentane-1,3-Dicarboxylic Acid	12.61	172.062	[M-H]-	172.062	True	5.56388e+08	9.28064e+07	8.80304e+07	2.0815e+08	9.8405e+07	1.59631e+08	0.599253	1.58139	0.661198	1.55396e+08	5.49951e+07	3.17514e+07	35.3904	2.45742e+08	2.69038e+08	1.55329e+08	109.48	0.723915	0.375006	0.374694	0.22239	C7H11NO4	Carboxylic acids and derivatives	YFYNOWXBIBKGHB-UHFFFAOYSA-N	NC1(CCC(C1)C(O)=O)C(O)=O	---	1310;59951972	HMDB0242328	Organic acids and derivatives	Carboxylic acids and derivatives	NoSig
POS967	Piperazineethanamine	12.242	130.134	[M+CH3OH+H]+	130.134	True	1.75928e+06	1.50568e+06	2.59928e+06	3309.03	3.44974e+06	1.32893e+06	0.749987	1.22632	0.294333	1.59399e+06	1.73844e+06	1.00369e+06	109.062	1.95474e+06	572404	330478	29.2828	0.844686	0.229535	0.23008	0.124946	C6H15N3	N-alkylpiperazines	IMUDHTPIFIBORV-UHFFFAOYSA-N	NCCN1CCNCC1	---	8795	---	Organoheterocyclic compounds	Diazinanes	NoSig
NEG5417	Imazapyr	7.528	260.104	[M-H]-	260.104	True	1.95819e+07	1.80152e+07	1.97757e+07	6.625e+07	7.13716e+07	6.70709e+07	8.21586e-06	0.280288	-1.83502	6.82308e+07	2.75076e+06	1.58815e+06	4.03155	1.91243e+07	965357	557349	5.04781	0.000346199	1.36422	1.36418	5.08535	C13H15N3O3	Amino acids and derivatives	CLQMBPJKHLGMQK-UHFFFAOYSA-N	CC(C)C1(C(=O)NC(=N1)C2=C(C=CC=N2)C(=O)O)C	C18864	54738	HMDB0253405	Organic acids and derivatives	Carboxylic acids and derivatives	DOWN
POS1572	(4-Methylcyclohex-3-Ene-1,1-Diyl)Dimethanol	12.007	157.122	[M+H]+	157.122	True	6.74205e+07	6.37826e+07	6.88049e+07	5.59302e+07	5.93286e+07	5.31942e+07	0.010577	1.18732	0.247711	5.6151e+07	3.0732e+06	1.77431e+06	5.47309	6.66693e+07	2.59407e+06	1.49769e+06	3.89095	0.0320445	1.25068	1.25089	1.97564	C9H16O2	Primary alcohols	JTRLVVUONAUOHI-UHFFFAOYSA-N	OCC1(CO)CC=C(C)CC1	---	3809023	---	Organic oxygen compounds	Organooxygen compounds	UP
POS672	N-Nitrosomorpholine	12.766	117.066	[M+H]+	117.066	True	8.17836e+07	8.36485e+07	3.3258e+07	1.04715e+08	6.60907e+07	8.7868e+07	0.372443	0.768112	-0.380612	8.62244e+07	1.93644e+07	1.118e+07	22.4581	6.623e+07	2.85699e+07	1.64948e+07	43.1373	0.523735	0.612914	0.613174	0.42894	C4H8N2O2	Morpholines	ZKXDGKXYMTYWTB-UHFFFAOYSA-N	C1COCCN1N=O	C19283	6046	HMDB0255208	Organoheterocyclic compounds	Oxazinanes	NoSig
NEG5347	3,5-Dihydroxycinnamic acid sulfate	7.845	258.991	[M-H]-	258.991	True	194632	185874	348003	514534	634534	1.21001e+06	0.0697387	0.308811	-1.69521	786360	371767	214640	47.2769	242836	91181.9	52643.9	37.5487	0.140628	1.06051	1.06087	1.15653	C9H8O7S	Cinnamic acids and derivatives	KTPBHOMURDURSV-OWOJBTEDSA-N	[H]\C(=C(\[H])C1=CC(O)=CC(OS(O)(=O)=O)=C1)C(O)=O	---	156960869	HMDB0240449	Phenylpropanoids and polyketides	Cinnamic acids and derivatives	NoSig
NEG3864	L-Lysopine	6.819	217.119	[M-H]-	217.119	True	2.66741e+07	2.36256e+07	2.26282e+07	3.56871e+06	5.29117e+06	4.62969e+06	0.000113529	5.40624	2.43463	4.49652e+06	868917	501669	19.3242	2.43093e+07	2.10781e+06	1.21694e+06	8.67079	0.00143023	1.35547	1.35547	3.94489	C9H18N2O4	Carboxylic acids and derivatives	ZZYYVZYAZCMNPG-UHFFFAOYSA-N	CC(NC(CCCCN)C(O)=O)C(O)=O	C04020	3325403	HMDB0033675	Organic acids and derivatives	Carboxylic acids and derivatives	UP
NEG5582	Carbobenzoxy-L-asparagine	6.84	265.083	[M-H]-	265.083	True	1.51845e+07	1.37359e+07	1.28605e+07	1.44287e+07	1.57004e+07	1.58098e+07	0.162136	0.90949	-0.136871	1.53129e+07	767758	443265	5.01378	1.3927e+07	1.17374e+06	677657	8.42779	0.281036	0.88901	0.889077	0.79012	C12H14N2O5	Amino acids and derivatives	FUCKRCGERFLLHP-SECBINFHSA-N	C1=CC=C(C=C1)COC(=O)N[C@H](CC(=O)N)C(=O)O	---	---	---	Organic acids and derivatives	Carboxylic acids and derivatives	NoSig
POS2317	2-amino-3-hydroxynonanoic acid	9.477	190.144	[M+H]+	190.144	True	4.66826e+07	4.63595e+07	4.5385e+07	7.67551e+07	4.43587e+07	4.33101e+07	0.474308	0.841891	-0.248294	5.4808e+07	1.9014e+07	1.09777e+07	34.6921	4.61423e+07	675513	390008	1.46398	0.618447	0.501643	0.501732	0.32394	C9H19NO3	Amino acids and derivatives	ICWOFXKZEXYLQJ-UHFFFAOYSA-N	CCCCCCC(O)C(N)C(=O)O	---	5305380	---	Organic acids and derivatives	Carboxylic acids and derivatives	NoSig
POS481	Phenylhydrazine	8.686	109.076	[M+H]+	109.076	True	1.72748e+06	4.498e+06	4.72523e+06	1.77669e+06	3.10394e+06	1.50733e+06	0.232764	1.71427	0.777597	2.12932e+06	854727	493477	40.1408	3.65024e+06	1.66903e+06	963614	45.7239	0.363956	0.785499	0.78596	0.633084	C6H8N2	Phenylhydrazines	HKOOXMFOFWEVGF-UHFFFAOYSA-N	NNC1=CC=CC=C1	C02304	7516	HMDB0256439	Benzenoids	Benzene and substituted derivatives	NoSig
POS1247	Pseudotropine	11.384	142.123	[M+H]+	142.123	True	7.76112e+06	4.43863e+07	5.98409e+06	2.26485e+07	8.86894e+06	6.2643e+06	0.641935	1.53861	0.621631	1.25939e+07	8.80437e+06	5.0832e+06	69.9098	1.93772e+07	2.16768e+07	1.25151e+07	111.868	0.75737	0.332771	0.33299	0.192509	C8H15NO	Tropane alkaloids	CYHOMWAPJJPNMW-RNLVFQAGSA-N	O[C@@H](C1)C[C@@H](C2)N(C)[C@@H](C2)1	C00729	449293	HMDB0259297	Alkaloids and derivatives	Tropane alkaloids	NoSig
POS2561	Epialyxialactone	14.435	201.112	[M+H]+	201.112	True	1.23793e+08	2.06122e+08	1.43408e+08	1.80844e+08	1.83907e+08	4.22269e+08	0.279844	0.601412	-0.733575	2.6234e+08	1.38511e+08	7.99694e+07	52.7983	1.57774e+08	4.30032e+07	2.48279e+07	27.2561	0.421145	0.723721	0.724198	0.553084	C10H16O4	Terpene lactones	DYRWCEDTDIXFOD-UHFFFAOYSA-N	CC1C(CC2C1COC(=O)C2CO)O	---	14194342	---	Lipids and lipid-like molecules	Prenol lipids	NoSig
POS9964	Antibiotic PF 1052	11.987	452.277	[M+H]+	452.277	True	2.94478e+08	3.00942e+08	3.15546e+08	2.01637e+08	1.9534e+08	1.71959e+08	0.000483952	1.60118	0.679134	1.89645e+08	1.56372e+07	9.02814e+06	8.24551	3.03655e+08	1.07924e+07	6.23102e+06	3.55418	0.00325648	1.34265	1.34275	3.3152	C26H39NO4	N-alkylpyrrolidines	NPWKEUKXVOMELT-LNVKXUELSA-N	O=C1C(C(=O)C(N1C)C(C)CC)=C(O)C2C(C=CC3CC(C)CC(C)C32)C4(OC4C)C	---	54687121	---	Organoheterocyclic compounds	Pyrrolidines	UP
POS7743	{4-[(4-chlorophenyl)methoxy]-3-methoxyphenyl}-N-(3-pyridylmethyl)carboxamide	1.336	383.116	[M+H]+	383.116	True	5.36457e+07	5.20373e+07	7.84043e+07	7.41768e+07	6.43531e+07	5.96461e+07	0.648559	0.928909	-0.106391	6.60587e+07	7.41396e+06	4.28045e+06	11.2233	6.13625e+07	1.47806e+07	8.53357e+06	24.0873	0.76279	0.32661	0.326579	0.188051	C21H19ClN2O3	Benzamides	BAXSUYQQDWAPBS-UHFFFAOYSA-N	COc1cc(C(O)=NCc2cccnc2)ccc1OCc1ccc(Cl)cc1	---	1124525	---	Benzenoids	Benzene and substituted derivatives	NoSig
POS7840	(7E)-11-Hydroxy-3-isobutyl-12-methoxy-4,5,8-trimethyl-2,3,3a,4,6a,9,10,11,12,13-decahydrocyclodeca[d]isoindole-1,14-dione	13.409	386.268	[M+H]+	386.268	True	2.5955e+07	3.03529e+07	2.7921e+07	1.9275e+07	2.5565e+07	2.34314e+07	0.0766514	1.23373	0.303032	2.27571e+07	3.19878e+06	1.84682e+06	14.0562	2.80763e+07	2.20305e+06	1.27193e+06	7.84665	0.151286	1.04508	1.04538	1.11548	C24H37NO4	Isoindolones	MQVLYVXFAYNRER-UHFFFAOYSA-N	O=C1CC(OC)C(O)CCC(=CC2C=C(C)C(C)C3C(N=C(O)C123)CC(C)C)C	---	134750437	---	Organoheterocyclic compounds	Isoindoles and derivatives	NoSig
POS1969	Menthol	8.847	174.185	[M+H]+	174.185	True	1.75343e+07	1.37707e+07	1.95051e+07	2.57134e+07	2.72091e+07	2.7074e+07	0.00511087	0.635154	-0.654823	2.66655e+07	827298	477641	3.1025	1.69367e+07	2.9135e+06	1.68211e+06	17.2023	0.0178442	1.28672	1.28677	2.29151	C10H20O	Menthane monoterpenoids	NOOLISFMXDJSKH-KXUCPTDWSA-N	OC1CC(C)CCC1C(C)C	C00400	16666	HMDB0003352	Lipids and lipid-like molecules	Prenol lipids	DOWN
NEG10141	Cortodoxone	10.557	391.212	[M-H]-	391.213	True	1.56069e+07	1.22788e+07	1.31182e+07	1.11897e+07	1.33086e+07	1.33511e+07	0.440071	1.08334	0.115491	1.26165e+07	1.2358e+06	713490	9.79514	1.3668e+07	1.73085e+06	999307	12.6636	0.589656	0.538351	0.538221	0.356478	C21H30O4	21-hydroxysteroids	WHBHBVVOGNECLV-UHFFFAOYSA-N	CC12CCC(=O)C=C1CCC1C2CCC2(C)C1CCC2(O)C(=O)CO	C05488	---	HMDB0000015	Lipids and lipid-like molecules	Steroids and steroid derivatives	NoSig
POS3322	Sebacic acid dimethyl ester	12.007	231.159	[M+H]+	231.159	True	3.40356e+08	3.31851e+08	3.59039e+08	2.65597e+08	2.67497e+08	2.62186e+08	0.000653549	1.29671	0.374853	2.65094e+08	2.69094e+06	1.55362e+06	1.01509	3.43749e+08	1.39077e+07	8.02964e+06	4.04591	0.00393417	1.33873	1.33874	3.18472	C12H22O4	Fatty acid methyl esters	ALOUNLDAKADEEB-UHFFFAOYSA-N	COC(=O)CCCCCCCCC(=O)OC	---	7829	---	Lipids and lipid-like molecules	Fatty Acyls	UP
NEG7289	Ovalitenin B	6.737	309.113	[M-H]-	309.113	True	9.19551e+07	8.05962e+07	8.97259e+07	5.78633e+07	6.88745e+07	6.04375e+07	0.00649437	1.40124	0.486701	6.23918e+07	5.75985e+06	3.32545e+06	9.23175	8.74257e+07	6.01862e+06	3.47485e+06	6.88427	0.0215656	1.27629	1.27639	2.18746	C19H18O4	Butyrophenones	AADNEQWIZKTMBL-UHFFFAOYSA-N	O=C(C1=CC=C2OC=CC2=C1OC)CC(OC)C=3C=CC=CC3	---	15160711	---	Benzenoids	Benzene and substituted derivatives	UP
POS3494	Decarestrictine D	9.144	239.089	[M+Na]+	239.089	True	4.55643e+07	3.85179e+07	4.07205e+07	34148307	4.03221e+07	4.0041e+07	0.30166	1.08987	0.124159	3.81705e+07	3.48612e+06	2.01271e+06	9.13302	4.16009e+07	3.60475e+06	2.0812e+06	8.66507	0.445742	0.697019	0.696953	0.520483	C10H16O5	Oxocins	HWMMWMJBUOCCFZ-XYEXOTNWSA-N	O=C1OC(C)CC(O)C=CC(O)C(O)C1	---	6507065	---	Organoheterocyclic compounds	Oxocins	NoSig
POS5228	Ricinoleic acid	12.164	299.258	[M+H]+	299.258	True	5.23553e+06	7.96241e+06	6.07085e+06	2.04828e+08	2.14114e+08	2.36529e+08	2.32872e-05	0.0293969	-5.08819	2.1849e+08	1.62973e+07	9.40925e+06	7.45905	6.42293e+06	1.39712e+06	806628	21.7521	0.000579616	1.36195	1.36199	4.63288	C18H34O3	Long-chain fatty acids	WBHHMMIMDMUBKC-UHFFFAOYSA-N	O=C(O)CCCCCCCC=CCC(O)CCCCCC	C08365	---	HMDB0034297	Lipids and lipid-like molecules	Fatty Acyls	DOWN
NEG2775	N-(3-Hydroxybutanoyl)homoserine lactone	12.457	186.078	[M-H2O-H]-	186.077	True	1.07959e+08	7.31743e+07	5.13675e+07	1.3442e+08	7.27742e+07	4.08302e+07	0.879492	0.93741	-0.0932477	8.26747e+07	4.75739e+07	2.74668e+07	57.5434	7.75001e+07	2.85425e+07	1.6479e+07	36.829	0.934556	0.110169	0.110092	0.0557682	C8H13NO4	Amino acids and derivatives	FIXDIFPJOFIIEC-UHFFFAOYSA-N	CC(O)CC(=O)NC1CCOC1=O	C21195	130846	HMDB0243607	Organic acids and derivatives	Carboxylic acids and derivatives	NoSig
NEG12745	3-{[1-(tert-butyl)(1,2,3,4-tetraazol-5-yl)][4-benzylpiperazinyl]methyl}-6-etho xyhydroquinolin-2-one	12.02	500.278	[M-H]-	500.278	True	7.11409e+06	9.1165e+06	6.41425e+06	9.53947e+07	8.60188e+07	7.18967e+07	0.000364342	0.0893958	-3.48365	8.44367e+07	1.18286e+07	6.82924e+06	14.0088	7.54828e+06	1.40247e+06	809717	18.58	0.00267531	1.34609	1.34602	3.43849	C28H35N7O2	Hydroquinolones	NEHSMRMOOSXSBN-UHFFFAOYSA-N	CCOc1ccc2[nH]c(=O)c(C(c3nnnn3C(C)(C)C)N3CCN(Cc4ccccc4)CC3)cc2c1	---	3150430	---	Organoheterocyclic compounds	Quinolines and derivatives	DOWN
NEG7061	3-Isoquinolinecarboxylic acid, 1,2-dihydro-1-oxo-4-(1H-pyrrol-2-yl)-, methyl ester	3.704	303.054	[M-H]-	303.054	True	1.8366e+08	1.94882e+08	1.41965e+08	2.48406e+07	9.49975e+07	4.35817e+07	0.0108044	3.18509	1.67133	5.44733e+07	3.63245e+07	2.09719e+07	66.6831	1.73502e+08	2.78826e+07	1.6098e+07	16.0705	0.0323603	1.24939	1.24963	1.9664	C15H12N2O3	Isoquinolones and derivatives	IADWMRZHOGHTMQ-UHFFFAOYSA-N	O=C(OC)C1=NC(O)=C2C=CC=CC2=C1C3=CC=CN3	---	57525107	---	Organoheterocyclic compounds	Isoquinolines and derivatives	UP
[truncated: 355 more rows]
